# Supplementary material for: Uncovering the functional diversity of rare CRISPR-Cas systems with deep terascale clustering
Source: PubMed Central journal article supplement (PMC10910872; doi:10.1126/science.adi1910), 2023-11-23
Supplement: NIHMS1969090-supplement-supplementary_information.pdf [file NIHMS1969090-supplement-supplementary_information.pdf]

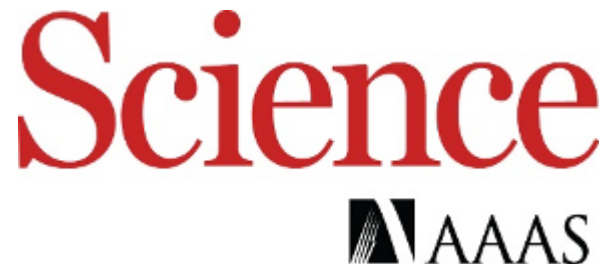

Supplementary Materials for  
**Uncovering the functional diversity of rare CRISPR-Cas systems with  
deep terascale clustering**

Han Altae-Tran<sup>1,2,3,4,5,\*</sup>, Soumya Kannan<sup>1,2,3,4,5,\*</sup>, Anthony J. Suberski<sup>1,2,3,4,5,‡</sup>,  
Kepler Mears<sup>1,2,3,4,5,‡</sup>, F. Esra Demircioglu<sup>1,2,3,4,5</sup>, Lukas Moeller<sup>1,2,3,4,5</sup>, Selin Kocalar<sup>1,2,3,4,5</sup>,  
Rachel Oshiro<sup>1,2,3,4,5</sup>, Kira S. Makarova<sup>6</sup>, Rhiannon K. Macrae<sup>1,2,3,4,5</sup>,  
Eugene V. Koonin<sup>6,†</sup>, and Feng Zhang<sup>1,2,3,4,5,†</sup>

**This PDF file includes:**

Materials and Methods  
Supplementary text  
Figs. S1 to S21  
Captions for Tables S1 to S6  
Captions for Data S1 to S6

**Other Supplementary Materials for this manuscript include the following:**

Tables S1 to S6  
Data S1 to S6

---

Affiliations: (1) Howard Hughes Medical Institute, Cambridge, MA 02139, USA; (2) Broad Institute of MIT and Harvard, Cambridge, MA 02142, USA; (3) McGovern Institute for Brain Research at MIT, Cambridge, MA 02139, USA; (4) Department of Brain and Cognitive Science, Massachusetts Institute of Technology, Cambridge, MA 02139, USA; (5) Department of Biological Engineering, Massachusetts Institute of Technology, Cambridge, MA 02139, USA; (6) National Center for Biotechnology Information, National Library of Medicine, National Institutes of Health, Bethesda, MD 20894, USA.

\* These authors contributed equally to this work. ‡ These authors contributed equally to this work.

† Correspondence should be addressed to F.Z. ([zhang@broadinstitute.org](mailto:zhang@broadinstitute.org)) and E.V.K. ([koonin@ncbi.nlm.nih.gov](mailto:koonin@ncbi.nlm.nih.gov)).

## List of Supplementary Materials:

|                                                                                                         |     |
|---------------------------------------------------------------------------------------------------------|-----|
| Materials and Methods .....                                                                             | 4   |
| Supplementary text. Extended discussion of FLSHclust algorithm .....                                    | 26  |
| Fig. S1. Complete FLSHclust algorithm .....                                                             | 27  |
| Fig. S2. Empirical scaling and benchmarking of FLSHclust vs other clustering algorithms.....            | 29  |
| Fig. S3. Performance benchmarks of various CRISPR finders against synthetically generated CRISPRs ..... | 34  |
| Fig. S4. Biochemical characterization of DinG-HNH system.....                                           | 43  |
| Fig. S5. Additional characterization of Cas8-HNH and Cas5-HNH effector complexes .....                  | 45  |
| Fig. S6. Analysis of candidate type VII proteins.....                                                   | 46  |
| Fig. S7. Structural comparison of Cas14 $\beta$ -CASP domain of and human $\beta$ -CASP protein .....   | 49  |
| Fig. S8. Spacer matches for candidate type VII system .....                                             | 50  |
| Fig. S9. New candidate subtype of type III CRISPR .....                                                 | 51  |
| Fig. S10. RNA cleavage by candidate type VII system. ....                                               | 52  |
| Fig. S11. Comparison of CRISPR types along with candidate type VII CRISPR type .....                    | 53  |
| Fig. S12. Index of all systems identified in this study .....                                           | 54  |
| Fig. S13. Representative loci of all systems identified in this study .....                             | 59  |
| Fig. S14. Limited loci of all systems identified in this study .....                                    | 86  |
| Fig. S15. AlphaFold2 predictions of CasMu-I system .....                                                | 284 |
| Fig. S16. CasMu-V Transposon ends and homing spacer.....                                                | 285 |
| Fig. S17. Structural comparison of DUF3800-TPR protein.....                                             | 286 |
| Fig. S18. Small RNA-seq of Cas12 RNPs from new Type-V associated systems.....                           | 288 |
| Fig. S19. PhageCas9 compared to a corresponding Cas9 in the host organism .....                         | 290 |
| Fig. S20. Additional interspaced repeat array systems.....                                              | 294 |
| Fig. S21. Alignments of various tRNA associated systems with variable spacer regions. ....              | 295 |
| Table S1. CRISPR association scores of clusters passing filters.....                                    | 298 |
| Table S2. Redundant names for Cas proteins .....                                                        | 298 |
| Table S3. Pipeline comparisons.....                                                                     | 298 |
| Table S4. Guide sequences, data and statistical analysis related to genome editing experiments .....    | 298 |
| Table S5. Taxonomic distribution of $\beta$ -CASP proteins .....                                        | 298 |
| Table S6. List of plasmids used in this study and links to sequences .....                              | 298 |
| Data S1. Appearance of CRISPR systems in public data .....                                              | 299 |
| Data S2. Genbank files of all redundant loci associated with the manually curated set of hits .....     | 299 |
| Data S3. Representative proteins from systems identified in this study.....                             | 299 |
| Data S4. Protein-protein association analysis results .....                                             | 299 |
| Data S5. Spacer analysis for candidate type VII system .....                                            | 299 |

Data S6. Genbank files of all plasmids.....299

## Materials and Methods

### FLSHclust implementation

The FLSHclust algorithm was implemented in Python 3 using PySpark for distributed computation on commodity clusters without shared memory or disk. Described below are the general implementation details (see Fig S1 for visual depiction of the algorithm).

The algorithm has the following core parameters: `min_seq_id`: The minimum sequence identity for including proteins in a cluster, `cov`: The minimum coverage between sequences for alignment, `cov_approx_factor`: an approximation parameter for filtering out sequences pairs that will not match the clustering criteria without actually aligning the sequences, `k`: The main kmer length used for clustering.

The family of hash functions used for locality-sensitive hashing is random position masking, which involves dropping random positions in each kmer before matching them with a hash table. Each hash function drops different combinations of positions. Thus, the set of hash functions can be reduced to the set of position combinations that are dropped,  $\{H_i\}$ , which essentially is a boolean matrix of positions that are to be dropped out. Optimal functions are generated using Markov Chain Monte Carlo (MCMC) as follows. We use the following method to achieve hash functions with no false negatives for up to  $r$  mismatches. All combinations of mismatch positions are enumerated up until a value  $m_{max}$  and stored as our input  $X$ . For an initial set of hash functions,  $\{H_i\}$ , LSH is performed on the entirety of  $X$ . The fraction of recovered sequences via LSH as a function of the number of mismatches,  $m$ , is stored as  $R$ . An energy function of the form  $\exp(-R / T)$  is used for MCMC to maximize  $R$  as a function of  $\{H_i\}$ . Optimal hash functions can be obtained and then stored for use. Perfect hash functions are obtained when  $R = 1$  at the end of optimization. Not all combinations of parameters will result in perfect hash functions.

Proteins are assigned random numeric ids at the start. Next all protein amino acid sequences are first converted to a reduced alphabet that groups related amino acids together. The reduced alphabet has 13 tokens, which allows each token to be represented by 4 bits, allowing for more space efficient representations than using a full char (8 bits). The map between tokens and amino acids are shown below:

[(0, ['T', 'A', 'S']), (1, ['L', 'M']), (2, ['I', 'V']), (3, ['R', 'K']), (4, ['Q', 'E']), (5, ['D', 'N']), (6, ['Y', 'F']), (7, ['W']), (8, ['C']), (9, ['G']), (10, ['H']), (11, ['P']), (12, ['U', 'O', 'J', 'Z', 'X', 'B', '\*'])]

Kmers of length  $k$  are then generated for each protein, while excluding any kmers that contain amino acid stop codons (“\*”) characters. Kmers are stored in compressed format as integers when performing joins and merges to reduce space usage. Compressed formats are calculated efficiently using a rolling calculation with bitshifting. Each reduced amino acid token is stored as 4 bits in the final representation, and the bits are stored in an 8 byte integer. Calculations comparing kmers and number of mismatches between kmers are performed directly on the bit representations when possible. To assist with reducing noise, for each kmer, we additionally add a paired kmer of the same size that is equal to the length  $k$  sequence immediately upstream from the kmer, which we refer to as the paired kmer (`kmer_pre`). Using the paired kmer mode is optional.

Next, we iterate over all  $L$  hash functions, starting with  $i=0$ . All kmers (represented as integers) are mapped to their respective hash values using the hash function  $H_i$ . Hash values are matched. Buckets with more than 1 kmer are retained. Two representative protein ids

(rep\_proteins) are then selected for each bucket: L\_rep, which is the protein id corresponding to the longest sequence in the bucket (using protein id as a tiebreaker), and H\_rep, which is the protein with the largest protein id (which was randomly selected at the start), using length (in descending order) as a tiebreaker. All proteins in the bucket are then paired to each of the two representative protein ids. For each protein/rep\_protein pair, if  $\text{cov} * \text{cov\_approx\_factor} * \text{length}(\text{rep\_seq}) > \text{length}(\text{protein})$ , then remove the pair from further consideration. If paired kmer mode is used, then additionally, the paired kmers between the protein and the rep\_protein are compared according to their hamming distances as computed from their bit representations. If the hamming distance divided by  $k$  is less than the min\_seq\_id, we discard the pair from future consideration. All remaining pairs are merged into a persistent bucketed table, and  $i$  is incremented from 0 to  $L-1$ . The persistent bucketed table is maintained across all iterations and holds all pairs of sequences to be aligned. The bucketing is performed on the join keys during save to prevent complete repartitioning of both the persistent and update table at each iteration, drastically reducing runtime. The maximum number of pairs in the table will be  $K * N * L$ , where  $K$  is the maximum sequence length. The iterations can be performed in batches as memory and disk allows.

After all iterations have been completed, the final persistent table is used to generate alignments. Due to the massive size of the table, the task of creating alignments is split further into  $A$  iterations, where  $A$  is determined by the size of the persistent table as well as the cluster resources so as to prevent consuming the entire storage of the cluster. For each of the  $A$  iterations,  $j=0, \dots, A$ , all rep\_seq ids with a modulo equal to  $j$  are considered for alignment. Then all passing protein/rep\_protein pairs are materialized using a join to a database containing the original sequences. The sequence identity between each protein and the rep\_protein sequences are then determined according to the user's choice of 1) a fast edit distance based estimate of sequence identity or 2) a slower but more Smith-Waterman accurate local sequence alignment using a Blosom62 scoring matrix with a gap open penalty of 11 and a gap extension penalty of 1 (which can be adjusted if desired). Minimum sequence coverage and minimum sequence identity are then enforced according to the clustering criterion min\_seq\_id and cov, resulting in a set of protein/rep\_protein pairs that satisfy the clustering criteria. After all  $A$  iterations have been performed and their results merged, the next step is the optional graph simplification.

The resulting set of remaining protein/rep\_protein pairs then form the basis for a directed graph. Graph simplification is essential for reducing long chains in the graph that result from deep homology within a family or fold of proteins. These long chains can result in very large communities detected by connected components and is thus important when clustering at low sequence identity and while using connected components for community detection. Graph simplification may not be necessary if other community detection algorithms are used.

The main graph simplification step works by clustering together nodes that are closely connected, in a way that preserves the overall structure of the graph. The first step is to create a new table of nodes and their degrees, where the degree of a node is the number of edges that it is connected to. Next, we group the edges by their destination node and aggregate the information for each node in a list of (degree, source) tuples. The winning edge for each node is then determined as the edge with the highest degree and smallest source node.

The next step is to determine the winning edges for each source and destination node. This is done by ranking the edges for each node based on their winning degree and then selecting the top-ranked edge. Finally, the winning edges for the source nodes are combined with the

winning edges for the destination nodes to form the final set of edges for the simplified graph. Any edges that connect a node to itself are filtered out.

After the graph simplification, a distributed connected components algorithm is performed on the graph to identify communities. Within each community, all sequences are realigned to the representative protein. Extremely large communities are processed separately to avoid skew times due to allocation to a single CPU.

The node with the max original degree in the graph (prior to simplification) within each community is selected as the megarep node. All nodes within the community that have not been aligned to the megarep node are realigned to the megarep node, forming new edges as required. For each cluster, all nodes are then sorted by the number of edges it is connected to within the cluster. The list of sorted nodes is then traversed and for each node visited that has not been assigned to a cluster, a new cluster is created consisting of all nodes that it is connected to that has not been clustered, along with itself. The final list of clusters are then combined across all communities to form the final clustering of the entire dataset. Numeric protein ids were then reassigned back to their original ids using a join.

### Clustering comparison

UniRef100, UniRef90, and UniRef50 were downloaded from UniProt on 2022-04-18 for comparing clustering methods. Clustering was performed either on UniRef90 or UniRef50 using multiple software packages as possible to compare their clustering results. For timing comparisons, different clustering software were tested on a OpenMPI/Hadoop cluster with two 64 CPU nodes (each of type n1-highmem64 from Google Cloud with 512 GB of memory and 2TB SSD disk each) against various random samples of differing size from UniRef50 to test their runtimes as a function of the number of input sequences. Linear models were fitted to linearithmic scaling functions ( $N \log N$ ) using a least squares fit with heteroskedastic error model where the expected variance scales with the square of the number of input proteins, while also forcing the constant and linear term to be non-negative. Quadratic models were fitted in the same manner for quadratic algorithms but using a quadratic model in place of a linearithmic model. The Nelder-Mead optimization algorithm was used to obtain minima.

For each 1M sample of UniRef50 (for 30 or 25% sequence identity clusterings) (or UniRef90 for 50% sequence identity clusterings, or UniRef100 for 90% sequence identity clusterings), as well as for the full UniRef50 dataset, the following was performed. All sequences were searched against the entire sample on a 160 CPU machine with 3.8TB shared memory using MMSeqs2 with sensitivity of 7.5, a minimum coverage of 0.8, and maximum 100 sequences per query, with the --realign mode. An exception was made for the full UniRef50 dataset, in which case only a 1M sample was selected. For each query, the top 100 hits were then realigned to the query using the standard Smith-Waterman algorithm with a Blosum62 matrix, a gap open penalty of 11 and a gap extension penalty of 1. If the number of aligned residues in the query divided by the length of the query was less than the `min_cov` of 0.8, then the query/target pair was ignored. Similarly, if the number of aligned residues in the target divided by the length of the target was less than the `min_cov` of 0.8, then the query/target pair was ignored. Of the passing query/target pairs, the target with the maximum sequence identity was selected to be the nearest neighbor. For each clustering result, the following was computed for each range of sequence identities (20-25%, 25-30%, ... 95-100%): the percentage of proteins that are clustered (that is the percentage of proteins that has a nearest neighbor within the given sequence identity range while also being found in a non-singleton cluster (cluster with size  $\geq 2$ ). The cumulative

(from 100% to 20% sequence identity) percentage of proteins clustered was also obtained by multiplying each sequence identity range by the number of proteins in the range and then summing (starting from the largest sequence identity range, 95-100%, and ending with the smallest sequence identity range, 20-25%), dividing by the total number of proteins in the input dataset.

Inter cluster distances were also analyzed using the following approach. For each clustering method, a random sample of 5000 cluster representatives from the resulting clustering was taken and aligned against all cluster representatives from the clustering using the above BLOSUM62 Smith-Waterman alignment strategy. For each sampled cluster representative, the sequence identity to the nearest (non-self) neighboring cluster representative was then taken to be sequence identity to the nearest cluster. A cumulative distribution (starting from 100% going down to 20%) was then generated on the quantity: sequence identity to the nearest cluster over the sample of 5000 cluster representatives. This analysis provided a comparison for how well a given clustering method generated clusters that are sufficiently far apart for the given target clustering threshold.

A power analysis of cluster sizes was also performed as a function of the input dataset size (based on the UniRef50 samples). The distribution of cluster size was plotted on a log-log scale for the resulting clustering from each of UniRef50 samples.

FLSHclust scaling as a function of number of nodes was computed by progressively scaling the number of compute nodes and testing for time of completion versus the 3160k sample UniRef50 dataset. Relative completion time was taken to be the time for completion at N nodes divided by time for completion using 1 node. Computational efficiency for each value of number of nodes (1, 2, 4, 8, or 16) was computed using the standard formula, which is the speedup (inverse of relative completion time) divided by the number of nodes.

#### CRONUS CRISPR repeat tool

CRONUS was implemented with python 3 and operates as follows. For main parameters, CRONUS uses the minimum number of repeats - `min_repeats` (default 3), the minimum repeat length - `min_len` (default 15), the minimum sequence identity between repeats - `min_id` (default 85), the maximal size of the direct repeats - `max_repeat_sz` (default 200), the maximum spacer length - `max_spacer_len` (default 200), the seed size of the initial search - `seed_size` (default 5), the maximum number of repeat types per array - `max_repeat_types` (default 2). A general description of the program is given below.

First, `vmatch2` is run with the query (len N) against itself with a seed length `seed_size` and a min identity `min_id` and a max edit distance based on the `min_len`, `min_id`, and `seed_size`. A sparse NxN coverage matrix was then formed containing all of the pairwise matches from `vmatch2` with max genomic distance of 400. Connected components were then obtained from treating the coverage matrix as an adjacency matrix. Clusters of related sequences were determined by the connected components algorithm. Match groups were formed based on the connected components, consisting of a sequence along with all of its matches if it belongs to a connected component. For each match group the following was performed: A focus region was defined as the entire region spanning the sequences found in the component plus an additional 200 bp on either side. Next, length 5 kmers from all sequences covered by the connected component are grouped into a list to serve as passable kmers. All kmers of length 5 in the focus region were then identified and counted, provided that they exist in the list of passable kmers. Kmers with a count of 3 or more were included for further processing. For each kmer, the

positions in the focus were taken into a list  $d$  in sorted order. If  $med\_len$ , the median difference in adjacent positions (called  $diff$ ) in  $d$  was below 15, the kmer was skipped. The spacing regularity was defined as  $\text{mean}(\text{abs}(diff - med\_len) \% med\_len)$ , where  $\%$  is the modulo operator. The normalized regularity was equal to the spacing regularity divided by the  $med\_len$ . If the normalized regularity was  $> 0.35$  or if  $med\_len \geq 300$ , then the kmers were discarded. For the remaining kmers, if any of them overlap with the positions of the initial matches from the match group, the match was retained. If the final number of matches was less than  $min\_repeats$ , then the entire match group was skipped. Next, the distances between all remaining matches were calculated. If the 80th percentile of the distance between matches (defined as  $soft\_max\_neigh\_dist$ ) is greater than  $2 * max\_spacer\_len$ , then the entire match group was skipped. Next, the match group was filtered to remove deviating matches. Specifically, if a match on either end of the match group is more than  $1.5 * soft\_max\_neigh\_dist$  from the rest of the list, it is removed. This is repeated until no more matches are removed.

Next, we construct a list of start and end positions for each putative DR, as determined by the current match group. We then sort these positions by their starting location. Next, we apply a merging step to combine overlapping DRs into longer contiguous regions. This is done by checking if two adjacent DRs have an overlap of at least  $overlap\_buffer$  base pairs, and if so, merging them together. After the DRs have been identified and merged, we align the putative DR sequences to each other and process the alignment to determine which DRs should be extended to improve the alignment. DRs are extended if they have a critical threshold of mismatches or gaps compared to the other DRs in the alignment. The extended DRs are then re-aligned with the other DRs, and the process is repeated until either no DRs need to be extended or the maximum number of iterations is reached. Using these alignments of the putative DRs, the DRs are further refined. The full alignment is converted into an embedding matrix,  $E$  of size  $N * 5 * M$ , where  $N$  is the number of sequences and  $M$  is the alignment length, by setting  $E[i, j + 5 * f(x[i, j])] = 1 / M$  for each  $i, j$ , and 0 otherwise, where  $f$  sends 'A' to 0, 'T' to 1, 'G' to 2, 'C' to 3 and '-' to 4. Lastly, clustering is performed using DBSCAN with the `dbscan` function from `scikit-learn`. The parameters used are  $eps=0.55$  and  $p=1$ . The  $eps$  parameter determines the maximum distance between two samples for them to be considered as in the same neighborhood. The  $p$  parameter is the power parameter for the Minkowski metric used by DBSCAN. Using the DBSCAN clusters, the repeat boundaries are refined while considering sequence divergence. The spacer regions are then tested for minimum variability.

To limit the extent of all-to-all comparisons within each contig, contigs are split into 20kb overlapping tiles (with 13334 bp overlaps) and CRONUS is run on each split with resulting overlapping CRISPR arrays deduplicated by prioritizing the longest arrays followed by the arrays with the smallest start site.

### Performance comparison of CRISPR finders on synthetic CRISPR array benchmark

A synthetic benchmark was constructed using parameterized probability distributions over CRISPR arrays. These CRISPR arrays were then embedded in totally random nucleotide sequences and then used as inputs for the various CRISPR finders along with different parameter combinations for the CRISPR finders. Tasks were parallelized using Apache Spark on a compute cluster with 6400 CPUs.

Synthetic CRISPRs were generated according to the following process. We start by setting the seed for the random number generator using the "trial" value. Then, we generate a consensus sequence for the direct repeat (DR) by generating a random sequence of canonical



bases (A, C, G, T) of length equal to the prespecified DR length. We also define a range for the DR size that is equal to  $[\text{floor}(\text{dr\_len} * (1 - \text{rel\_indel\_range})), \text{ceil}(\text{dr\_len} * (1 + \text{rel\_indel\_range}))]$ . Similarly, we define a range for the spacer size that takes into account the spacer indel relative range, equal to  $[\text{floor}(\text{dr\_len} * (1 - \text{spacer\_rel\_indel\_range})), \text{ceil}(\text{dr\_len} * (1 + \text{spacer\_rel\_indel\_range}))]$ .

Next, we create empty lists to hold the DR and spacer sequences generated in the loop. We iterate "n\_dr" times to generate the DR sequences. For each DR, we start with the consensus sequence and perform mismatches by randomly selecting a base that is different from the consensus base with a probability of "p\_mismatch". We then check if an indel should be performed by randomly selecting a value between the defined range for the DR size and comparing it to the original length. If an indel should be performed, we randomly select the position(s) and type of indel(s) to be made. If an insertion is made, we insert a randomly chosen base at the selected position(s). If a deletion is made, we remove the base(s) at the selected position(s). The resulting DR sequence is added to the list.

Similarly, we iterate "n\_dr-1" times to generate the spacer sequences between the DRs. For each spacer, we start with the consensus spacer sequence and perform mismatches with a probability of "1 - p\_spacer\_similarity". This allows control over the level of similarity between spacer sequences. For all tests used, p\_spacer\_similarity is selected to be 0.3, resulting in highly differing spacer sequences. We then check if an indel should be performed by randomly selecting a value between the defined range for the spacer size and comparing it to the original length. If an indel should be performed, we randomly select the position(s) and type of indel(s) to be made. If an insertion is made, we insert a randomly chosen base at the selected position(s). If a deletion is made, we remove the base(s) at the selected position(s). The resulting spacer sequence is added to the list.

The final CRISPR array is formed by interleaving the spacers into the DR sequences and then concatenating the full array into a single sequence. Then, we generate left and right flanking sequences to be added to the CRISPR sequence. Then we generate a random DNA sequence of length 20000 and insert the synthetic CRISPR array at the randomly selected position in the sequence.

For each CRISPR parameter set of the 35 selected combinations, 2000 random synthetic CRISPRs embedded in random DNA sequences were created using the above procedure, and all CRISPR predictors with selected corresponding parameters were tested against the synthetic sequences, keeping track of time elapsed.

To understand the CRISPR performance of each of the finders, we compiled scores for each CRISPR finder / CRISPR parameter set (condition group) pair as follows. We defined the consensus sequence of a list of DRs to be the DR with the minimum average normalized edit distance to the remaining DRs, where the normalized edit distance is defined as the edit distance between DR\_i and DR\_j divided by the minimum length of the two DRs (DR\_i, DR\_j). We then calculated 3 simple metrics of performance: "hit" rate, "DR count error" and "boundary position error" (indels between predicted and true DR). For each synthetic CRISPR, a predicted CRISPR was considered a "hit" if it overlaps with the synthetic CRISPR interval (expanded by a 50 bp buffer). If a hit was found, then we aligned the consensus of the synthetic DRs with the consensus of the predicted DRs using Biopython pairwise2 alignment module and calculated the number of gap columns in the alignment as the boundary prediction error (in bp). The absolute value difference between the number of true DRs and predicted DRs was taken to be the DR count error. We then used bootstrapping with 2000 samples to calculate the mean, upper quartile,

and lower quartile of the means of all three performance metrics as well as elapsed time in order to compare between all CRISPR predictors.

### Prokaryotic genome/metagenome CDS prediction and clustering

We used Prodigal (76) to predict all genes in the genomes/metagenomes, using the metagenomic option for metagenomic datasets (WGS metagenomes, JGI, MG-RAST). Next we deduplicated all proteins, then iteratively clustered all proteins at 100%, 98%, 90%, 70%, 50%, and 30% sequence identities with a minimum coverage of 80%. For 100%-50% sequence identity, we clustered using the FLSHclust implementation without the use of LSH functions and used the LSH functions for clustering from 50% to 30% sequence identity. All 6 clusterings along with deduplication were performed with the FLSHclust implementation over the course of ~1-2 weeks with intermittent breaks on a Hadoop cluster containing 30 compute nodes with 32CPUs, 256 GB memory and 2TB SSD non-shared storage each.

### Sensitive CRISPR discovery pipeline

For CRISPR prediction, 4 CRISPR finders were used with a total of 6 different runs based on parameter combinations selected from a calibration against the synthetic CRISPR array benchmark. Parameters for each CRISPR finder are as follows:

1. PILERCR with minarray=3, mincons=0.9, minid=0.94, maxrepeat=64, maxspacer=64 (codename PILER\_1)
2. PILERCR with minarray=3, mincons=0.8, minid=0.85, maxrepeat=128, maxspacer=128 (codename PILER\_5)
3. CRT with minNR=3, minRL=16, maxRL=128, minSL=16, maxSL=128 (codename CRT\_2)
4. CRISPRFinder with mNS=2 (codename CRISPRFinder)
5. CRONUS with seed\_size=5, min\_len=16, minid=8, max\_repeat\_size=128 (codename CRONUS\_2)
6. CRONUS with seed\_size=11, min\_len=16, minid=80, max\_repeat\_size=512 (codename CRONUS\_4)

Next, we deduplicated CRISPR array predictions from the various CRISPR finders as follows. For each contig, we create an empty list of intervals. We loop through each CRISPR and check if it overlaps with any of the existing intervals. If it does, we merge the intervals and add the CRISPR to the corresponding list of CRISPRs in the merged interval. If it doesn't overlap with any existing intervals, we create a new interval for the CRISPR.

Finally, we select the best CRISPR from each interval by selecting the CRISPR with the most DRs, highest priority index, longest length, and earliest start position. Here, the priority index of the various CRISPR finders is determined according to the following order: ['CRISPRFinder', 'PILER\_5', 'PILER\_1', 'CRT\_2', 'CRONUS\_4', 'CRONUS\_2']. For consistency across the CRISPR arrays, we then redefine the spacers to be the sequences interleaving the predicted DRs as not all CRISPR prediction tools may do this.

We defined the distance (interval\_distance) between two genomic feature intervals (e.g. a CRISPR array, or CDS) to be equal to zero if the two intervals overlap, and otherwise the minimum distance between all combinations of the endpoints. We further corrected this distance

for circular contigs (e.g. plasmids and some phage, entire bacterial genomes) by using the nearest distance along a circle as opposed to a line when necessary.

We then used the following procedure to define operons from the set of predicted proteins within a given contig. We create two lists called "proteins\_f" and "proteins\_r" to store proteins in forward and reverse directions, respectively. We then sort the proteins in both lists based on their starting position for forward proteins and ending position for reverse proteins. We create an empty list called "intervals\_f" to store forward protein operons. We loop through each forward protein in "proteins\_f" and get its starting and ending positions. If the "intervals\_f" list is empty, we create a new interval with the protein and append it to the list. Otherwise, we check if the current protein is within a distance of 200bp to the last interval in the list. If it is, we add the protein to the last operon and update its starting and ending positions to encompass all proteins currently in the operon. If it is not, we create a new interval with the protein and append it to the list. If the DNA strand is circular and there is more than one interval in the "intervals\_f" list, we check if the first and last intervals are within the maximum distance of each other. If they are, we merge them into a single interval that crosses the circular boundary. We repeat the above process for the reverse proteins and store the resulting intervals in a list called "intervals\_r". The final set of operons is defined by the concatenation of "intervals\_f" and "intervals\_r"

We then define the operonic distance between a protein and another feature of interest as the interval\_distance between the feature of interest and the operon containing the protein. We then computed the operonic distance between each protein and the nearest CRISPR array. For this study, we set max\_association\_distance = 3000 to be the maximum operonic distance between a protein gene and a CRISPR array at which the protein gene is considered to be associated with a CRISPR array. For each gene, the associated CRISPR array is the CRISPR array closest to the protein within max\_association\_distance operonic distance from the protein, or an empty array if none exists.

Metagenomic data poses a challenge in inferring associations due to the tendency for short contigs to contain partial systems. However, the information from metagenomic data can still be leveraged for calculating associations by calculating an effective sample size for each protein that incorporates information about distances to the contig edge. For each protein, two quantities are computed, "u\_d" and "d\_d" which are the upstream and downstream distances to the contig edge from the operon containing the protein. Upstream and downstream are determined relative to the orientation of the protein on the contig. The contig weight for the protein is then computed as the weighted average  $w = 0.5 * \min(1, u_d / \text{max\_association\_distance}) + 0.5 * \min(1, d_d / \text{max\_association\_distance})$ . If the protein is not associated with a CRISPR array (i.e. there is no CRISPR array with an operonic distance of less than 3000 to the protein), the effective sample size is the contig weight. If the protein is considered to be associated with a CRISPR array, then the effective sample size is equal to 1.

Proteins are then redundancy reduced as follows. All proteins within the same c90 cluster (90% identity cluster) are grouped. The proteins are then ordered in lexicographic order using the followed ordered criteria: 1) the number of DRs in the associated CRISPR array (descending order), 2) contig weight of the protein (descending order), 3) the protein id as a tiebreaker (descending order). The rank 1 protein from each c90 cluster as determined from the above ordering is then selected to be the representative protein for the c90 cluster with regards to association calculation. The resulting set of proteins is considered to be the redundancy reduced set for the naive score calculation.

The naive association score is then calculated as follows. For each c30 cluster (30% identity cluster), three quantities were computed using all the non-redundant proteins (c90 cluster representatives defined above) contained within the 30% cluster: the number of non-redundant proteins with CRISPR associations ( $N_{cr}$ ), and the sum of the effective sample sizes of all non-redundant proteins ( $N_{eff}$ ), as well as the total number of non-redundant proteins ( $N$ ). The naive score (referred to as  $weighted\_icity$ ) was then calculated to be  $S = N_{cr} / N_{eff}$ .

All 30% clusters with ( $weighted\_icity \geq 0.02$  and  $N_{cr} \geq 2$ ) or ( $weighted\_icity \geq 0.1$  and  $N_{cr} \geq 1$ ) were selected for performing blast searches of the respective DRs in order to calculate the enhanced score. Therefore, extremely low confidence clusters were dropped to avoid performing excessive blast searches. The remaining 30% clusters were considered candidate 30% clusters.

We then searched for divergent DRs for the candidate 30% clusters as follows. All non-redundant 90% clusters were assigned to the consensus DR of the closest CRISPR array of the representative cluster member, which were selected as above. Then, for each of the 30% clusters, the consensus DRs of all 90% clusters were collected into a list. For each protein belonging to the candidate 30% clusters, the 10kb vicinity was searched against all of the consensus DRs from the 30% cluster using an expect value of  $1e-3$  (with the db size equal to the 10kbp window around the protein, accounting for reduced size when necessary due to short contigs), and a word size of 7, a gap open penalty of 6, and a gap extension penalty of 2. We additionally required a minimum coverage of 0.4 to the DR to be considered a divergent DR, that is match length / DR length was required to be  $\geq 0.4$ . Furthermore, we required that all matches be  $\geq 16bp$  to reduce noise. Matches with an operonic distance of 3kbp or more were discarded. All remaining matches were considered divergent DRs (alternatively referred to as “searched DRs”). Enhanced CRISPR scores were then calculated in the same manner as the naive score, but using the “searched DRs” in place of the CRISPR arrays when computing all quantities, namely presence of CRISPR within the vicinity (“searched DRs” within 3kbp of the protein) and effective sample size, with the caveat that only “searched DRs” for a given 30% cluster were considered for scoring that cluster (i.e. “searched DRs” for cluster  $i$  would not be used to count towards the scores for cluster  $j$ ).

Protein-protein associations were then computed using same  $weighted\_icity$  method as above except with a prespecified cluster id ( $c30\_id$ ) in place of CRISPR arrays and an association distance of 10kb in place of 3kb. Each cluster ( $c30\_id$ ) from the above analysis was used, providing specific associations between other genes and newly identified candidate CRISPR-associated genes.

For selecting an appropriate threshold for the CRISPR association score, we selected a set of Cas and Non-Cas genes. For the Cas genes, we selected Cas9, Cas12, Cas13, Cas7, Csf2, and Cas7\_TypeIII (profiles described below in Appearance of CRISPR systems in the public dataset). We took all  $c98\_id$  clusters (clusters at 98% sequence identity) and checked if any had a hit to these profiles using HMMER with an e-value cutoff of  $1e-50$  (as determined by searching against the complete set of Cas profiles). A  $c30\_id$  was considered then to be a Cas cluster (for this analysis) if any 98% cluster had a hit to one of the above Cas profiles. For the Non-Cas genes, the same was performed, except with a more permissive cutoff of  $1e-5$  and also only using the following PFAM profiles, which were determined to be in general unrelated to CRISPR:

'PF04313', # HSDR\_N\_1  
'PF00144', # Beta-lactamase  
'PF00665', # RVE (transposases)

'PF10145', # Phage tail minor protein  
'PF00437', # Type II/IV SS  
'PF00085', # Thioredoxin  
'PF01841', # Transglutaminase  
'PF00313', # Cold shock domain  
'PF07508', # Recombinase  
'PF01765', # Ribosome recycling factor

### Pipeline comparisons

Various pipelines that estimate CRISPR association score were all run using a minimum  $N_{\text{eff}}$  of 3 and a minimum calculated score of 0.35. The pipelines considered were the full pipeline, and pipelines using the simple weighted score either with 50% clusters or 30% clusters (as produced by FLSHclust) with either all predicted CRISPRs or only those predicted by the CRT\_2 condition. The number of passing clusters from each were reported, as well as the number of overlaps between the passing clusters and the full set of 187 clusters corresponding to the 187 identified systems (excluding PhageCas9 system due to this system being identified for having a score of 0).

### Appearance of CRISPR systems in the public dataset

All projects from NCBI, JGI, WGS, and EMBL were mapped to their project add dates whenever possible. Projects that could not be matched were discarded from analysis. All predicted proteins were then assigned a date based on the add date of the corresponding project. The appearance of a cluster in the public data was defined as follows. All proteins with an upstream or downstream distance to the contig edge of < 500bp were discarded due to their low quality and likely presence of protein truncations from having incomplete contigs. Then all proteins with a distance of  $\leq 10000$  bp to a predicted CRISPR array were retained. For each 90% cluster, the minimum add date of all proteins within the cluster was taken to be the appearance date of the 90% cluster (referred to as non-redundant protein). This step constitutes the redundancy reduction step for CRISPR-associated non-redundant proteins in the calculation. Afterward, for each 30% cluster, all of the CRISPR-associated non-redundant proteins were obtained, and their appearance dates sorted. The date of the 2nd row in the sorted list was designated the appearance date of the cluster in the public data (corresponding to the minimum date at which 2 or more CRISPR-associated non-redundant proteins existed in the public data). The appearance date of a given CRISPR system was then defined as the minimum appearance date of all clusters from the system, as defined by a given signature gene. For the PhageCas9 system, which was not associated with CRISPR arrays, we disregarded the requirement that the loci are CRISPR associated when identifying loci for the appearance date calculation.

The signature genes used for defining the system are as follows: VII: b-CASP, Cas12+DUF3800: DUF3800-TPR, Cas5-HNH: Cas5-HNH, Cas8-HNH: Cas8-HNH, DinG-HNH: DinG-HNH, CasMu-V: Cas12, CasMu-I: CasMuC, Cas12+IscB: IscB, Cas12+Cas3: Cas12, PhageCas9: Cas9, Cas8-Cas3: Cas8-Cas3, Cas5-Cas3: Cas5-Cas3, Cas11-VRR: Cas11-VRR, gRAMP: gRAMP, Cas13bt: Cas13bt.

For the known CRISPR genes, the following combinations of HMMER profiles were used per system, where KOON indicates the profile were taken from (9), and when indicated from (77):

```
CARF = ['KOON_icity0089',  
'KOON_icity0091',  
'KOON_icity0093',  
'KOON_icity0095',  
'KOON_icity0100',  
'KOON_icity0102',  
'KOON_icity0103',  
'KOON_icity0104',  
'KOON_icity0119',  
'KOON_icity0120',  
'KOON_icity0105',  
'KOON_cls000179',  
'KOON_COG0640',  
'KOON_cd09694',  
'KOON_cd09699',  
'KOON_cd09742',  
'KOON_cd09746',  
'KOON_COG1517',  
'KOON_COG4006',  
'KOON_pfam09651',  
'KOON_pfam09659',  
'KOON_cd09660',  
'KOON_cd09668',  
'KOON_cd09671',  
'KOON_cd09686',  
'KOON_cd09702',  
'KOON_cd09723',  
'KOON_cd09728',  
'KOON_cd09732',  
'KOON_cd09741',  
'KOON_cd09747',  
'KOON_cls000955',  
'KOON_cls001403',  
'KOON_mkCas0085',  
'KOON_mkCas0108',  
'KOON_mkCas0109',  
'KOON_mkCas0112',  
'KOON_pfam09002',  
'KOON_pfam09455',  
'KOON_pfam09623',  
'KOON_pfam09670',]
```

```
Cas1 = ['KOON_COG1518',  
'KOON_cd09634',  
'KOON_cd09636',  
'KOON_cd09718',
```

```
'KOON_cd09719',
'KOON_cd09720',
'KOON_cd09721',
'KOON_cd09722',
'KOON_icity0124',
'KOON_pfam01867',
'TIGR00287',
'TIGR03637',
'TIGR03638',
'TIGR03639',
'TIGR03640',
'TIGR03641',
'TIGR03983',
'TIGR04093',
'TIGR04329',
'cas1', # From CRISPRDisco
'cas1_updated' # FROM CRISPRDisco
]
```

```
Cas2 = ['KOON_COG1343',
'KOON_COG3512',
'KOON_cd09638',
'KOON_cd09648',
'KOON_cd09725',
'KOON_cd09755',
'KOON_icity0022',
'KOON_mkCas0081',
'KOON_mkCas0128',
'KOON_mkCas0179',
'KOON_mkCas0206',
'KOON_pfam09707',
'KOON_pfam09827',
'TIGR01573',
'TIGR01873',
'cas2', # From CRISPRDisco
]
```

```
Cas4 = ['KOON_COG1468',
'KOON_COG4343',
'KOON_cd09637',
'KOON_cd09659',
'KOON_cls000170',
'KOON_pfam01930',
'KOON_pfam06023',
'TIGR00372',
'TIGR01896',
```

```
'TIGR04328',  
'cas4' # From CRISPRDisco  
]
```

```
Cas6 = 'KOON_COG1583',  
'KOON_COG5551',  
'KOON_cd09652',  
'KOON_cd09664',  
'KOON_cd09674',  
'KOON_cd09703',  
'KOON_cd09727',  
'KOON_cd09733',  
'KOON_cd09739',  
'KOON_cd09759',  
'KOON_cd09760',  
'KOON_cls000004',  
'KOON_cls000976',  
'KOON_icity0019',  
'KOON_icity0020',  
'KOON_icity0025',  
'KOON_icity0026',  
'KOON_icity0028',  
'KOON_mkCas0062',  
'KOON_mkCas0066',  
'KOON_mkCas0091',  
'KOON_mkCas0166',  
'KOON_pfam01881',  
'KOON_pfam08798',  
'KOON_pfam09559',  
'KOON_pfam09618',  
'KOON_pfam10040',  
'TIGR01877',  
'TIGR01907',  
'TIGR02563',  
'TIGR02807',  
'cas6' # From CRISPRDisco  
]
```

```
Cas9 = ['cas9', # From CRISPRDisco  
'TIGR01865',  
'TIGR03031',  
'KOON_cd09643',  
'KOON_cd09704',  
'KOON_COG3513',  
'KOON_icity0002',  
'KOON_mkCas0193'
```



]

Cas12a = ['KOON\_Cas12a', 'KOON\_Cas12a\_var']

Cas12b = ['KOON\_Cas12b', 'KOON\_Cas12b2']

Cas12c = ['KOON\_Cas12c', 'KOON\_Cas12c\_arbor\_variant']

Cas12d = ['KOON\_Cas12d']

Cas12e = ['KOON\_Cas12e', 'KOON\_Cas12e\_var'],

Cas12=[

'KOON\_Cas14e', 'KOON\_Cas14f', 'KOON\_Cas12a', 'KOON\_Cas12a\_var', 'KOON\_Cas12b', 'KOON\_Cas12b2', 'KOON\_Cas14g', 'KOON\_Cas12c', 'KOON\_Cas12c\_arbor\_variant', 'KOON\_Cas12d', 'KOON\_Cas12e', 'KOON\_Cas12e\_var', 'KOON\_Cas14a', 'KOON\_Cas14b', 'KOON\_V\_U3', 'KOON\_Cas14c', 'KOON\_Cas14u', 'KOON\_V\_U4', 'KOON\_V\_U2', 'KOON\_V\_U1', 'KOON\_V\_U5', 'KOON\_Cas14d', 'KOON\_Cas14h', 'KOON\_Cas12g', 'KOON\_Cas12h', 'KOON\_Cas12i', 'cas12a', 'cas12b', 'cas12c', 'cas12d']

Cas13a = ['KOON\_Fish20601',

'cas13a' # From CRISPRDisco

]

Cas12b = ['KOON\_Fish20602',

'KOON\_Fish20602a',

'cas13b' # From CRISPRDisco

]

Cas13c = ['KOON\_Fish20603',

'cas13c' # From CRISPRDisco

]

Cas13d = ['KOON\_Cas13d',

'cas13d' # From CRISPRDisco

]

Cas7 = ['KOON\_COG1857',

'KOON\_COG3649',

'KOON\_cd09640',

'KOON\_cd09646',

'KOON\_cd09650',

'KOON\_cd09677',

'KOON\_cd09678',

'KOON\_cd09685',

'KOON\_cd09687',

'KOON\_cd09689',

'KOON\_cd09690',

'KOON\_cd09717',

'KOON\_cd09737',

'KOON\_cd09738',

```
'KOON_cls000038',  
'KOON_cls000079',  
'KOON_mkCas0088',  
'KOON_pfam01905',  
'KOON_pfam05107',  
'KOON_pfam09344',  
'KOON_pfam09615'  
]
```

```
Cas7_TypeIII = ['KOON_icity0012',  
'KOON_cd09662',  
'KOON_icity0009',  
'KOON_mkCas0142',  
'KOON_cls000184',  
'KOON_cls000253',  
'KOON_cd09657',  
'KOON_cls000708',  
'KOON_mkCas0198',  
'KOON_COG1332',  
'KOON_COG1336',  
'KOON_icity0013',  
'KOON_cd09683',  
'KOON_mkCas0086',  
'KOON_pfam03787',  
'KOON_cls001827',  
'KOON_mkCas0182',  
'KOON_COG1604',  
'KOON_cd09709',  
'KOON_cls000670',  
'KOON_mkCas0143',  
'KOON_icity0006',  
'KOON_COG1367',  
'KOON_pfam09617',  
'KOON_COG1337',  
'KOON_mkCas0095',  
'KOON_mkCas0175',  
'KOON_cls000690',  
'KOON_cd09661',  
'KOON_cd09726',  
'KOON_cd09682',  
'KOON_cd09684',  
'KOON_mkCas0102']
```

```
Csf1 = ['KOON_cd09705', 'KOON_icity0010', 'KOON_mkCas0068', 'KOON_mkCas0185',  
'KOON_mkCas0210']
```

Csf2 = ['KOON\_cd09706', 'KOON\_mkCas0162', 'KOON\_mkCas0183']

Csf3 = ['KOON\_cd09707', 'KOON\_mkCas0093']

The signature genes used for the appearance data calculation were as follows: Type I: Cas7, Type II: Cas9, Type III: Cas7\_TypeIII, Type IV: Csf2, Type V: Cas12, Type VI: Cas13. For Type V, V-F was excluded due to profile overlap with TnpB, while V-H and V-E were excluded because they were identified from non-public data. The following concerns curation of the c30\_ids that are associated with each broad CRISPR-Cas designation. First, to predict gene families, HMMER search was performed using all profiles against each of the 98% cluster representatives with a maximum e-value score of  $1e-10$ , assigning each gene to the profile with the lowest e-value. For each profile set (e.g. Cas9, Cas1...), all 98% cluster centers were considered “hits” if the representative protein matched any profile in the profile set and fit within the size range, assigned as follows: Cas1: (150, 400), Cas2: (50, 200), Cas4: (200, 500), Cas6: (150, 500), Cas7: (200, 400), Cas7\_TypeIII: (150, 400), Csf2: (150, 400), Csf1/3: (1500, 1000), Cas9: (700, 2200), Cas12: (500, 2500), Cas12 subtypes (500, 2000), Cas13: (700, 2000), Csn2: (50, 400). The mean number of passing “hits” per 90% cluster was then aggregated. 90% clusters were considered “passing” if 50% or more of the 98% clusters in the 90% cluster was a “hit”. A 30% cluster was then considered a “match” to the signature gene of interest if 10% or more of the 90% clusters in the 30% cluster were considered “passing.” For each CRISPR system, the corresponding set of “matches” for the signature gene was used to calculate the appearance date as above. For the general calculation of all type V related clusters, an additional requiring either protein size to be  $\geq 800$ aa or have a weighted CRISPR-association score of  $\geq 0.25$  to avoid TnpB contamination. V-D and V-C profiles overlapped heavily and were thus combined into one designation

#### Spacer search for selected CRISPR systems

CRISPR spacers were obtained from predicted CRISPR arrays, including the left and right cryptic “spacers” outside of the array by extending 30bp past the first and last DRs. A consensus DR was obtained for each CRISPR array by taking the DR with the minimum average normalized edit distance to all the other DRs in the array, where we define normalized edit distance as the edit distance between DR<sub>i</sub> and DR<sub>j</sub> divided by the maximum length of DR<sub>i</sub> and DR<sub>j</sub>. Each spacer was assigned a representative DR equal to the consensus DR for the CRISPR array it originated from.

Spacers were then searched against the entire genomic/metagenomic database using BLASTN with an e-value cutoff of 1 and word size of 11, and effective database size of 8871099067954. The effective database size was used because the BLASTN search was performed by distributing the query identically over all nodes in the cluster and then using each cluster node to blast the query against different subsets of the full database, such that the full database was searched against across all nodes. Instead of an e-value cutoff, a bit score threshold of 48 was used as a minimum for a significant match. A threshold was selected as opposed to an e-value cutoff to reduce the effect of database size on the search, however, the database size still affected the number of candidate hits below the e-value cutoff of 1. For each query, all target matches were then expanded by 100bp in each direction. The representative DR for the spacer was then searched against the expanded region using BLASTN with a word size of 7. A target was then considered a self-match if any of the DR representative blast hits occurred within

100bp of the spacer target match with a minimum bit score of 24. Here, a self-match is a spacer match to a locus that is identical or similar to the original CRISPR array containing the spacer. All target matches with self-matches as defined above were removed. All remaining matches were considered significant matches to the spacer sequence that are considered unrelated to the original locus.

#### E. coli PAM discovery assay

100 ng each of one plasmid expressing the proteins and corresponding crRNA from the system of interest and one plasmid containing a target 8N degenerate flanking library plasmid were transformed by electroporation into 30  $\mu$ L Endura Electrocompetent *E. coli* (Lucigen) as per the manufacturer's protocol, with 3 biological replicates per condition as well as 3 biological replicates of an empty control. After recovery by shaking at 37°C for 1 hour, cells were plated across one 22.7cm x 22.7 cm BioAssay plate with the appropriate antibiotic resistance and grown for 12-16 h at 37°C. Cells were scraped from the plate and mixed well, and 2 mL of the scraped cells were used as input to minipreps (Qiagen). 100 ng miniprep plasmids were input to PCR to amplify the PAM-containing region with an 8-cycle PCR using NEBNext High Fidelity 2X PCR Master Mix (NEB) with an annealing temperature of 63°C, followed by a second 12-cycle PCR to further add Illumina adaptors and barcodes. Amplified libraries were gel extracted, quantified by a Qubit dsDNA HS assay (Thermo Fisher Scientific) and subject to single-end sequencing on an Illumina NextSeq with Read 1 75 cycles, Index 1 8 cycles and Index 2 8 cycles. PAMs were extracted and Weblogos depicting PAMs depleted 5 standard deviations relative to the empty control were visualized using Weblogo3.

#### Expression and purification of recombinant proteins

*Cas5-HNH, Cas8-HNH and DinG-HNH effector RNP complexes:* To purify the Cas5-HNH, Cas8-HNH and DinG-HNH-associated effector complexes in complex with their cognate crRNAs, the *E. coli* codon optimized operons were cloned into pET45b(+) backbone. A His14 tag was inserted at the N-terminus of the Cas11 gene for Cas5-HNH, the Cas8-HNH gene for Cas8-HNH and the Cas5 gene in the DinG-HNH-associated Cascade by Gibson assembly. The crRNAs were similarly cloned into a separate pCOLADuet-1 vector under control of a T7 promoter, and co-expressed with the cognate Cascade proteins in BL21(DE3) strain (NEB). Cells were grown at 37°C in autoinduction terrific broth (TB) medium (78) supplemented with 100  $\mu$ g/ml ampicillin and 100  $\mu$ g/ml kanamycin until reaching an optical density (OD600) of 0.4-0.6, then shifted to 18°C for overnight induction. The bacteria were harvested by centrifugation and the cell paste was resuspended in lysis buffer (50 mM Tris-HCl pH 8, 200 mM NaCl, 5% glycerol, 40 mM imidazole and 5 mM  $\beta$ -mercaptoethanol) supplemented with protease inhibitors (PMSF and Roche cOmplete, EDTA-free). The resuspended pellet was lysed by two passes with a high-pressure homogenizer (LM20 Microfluidizer, Microfluidics). The lysate was cleared by centrifugation, and the soluble fraction was mixed with Ni Sepharose 6 Fast Flow Affinity Chromatography Media (Cytiva) at 4°C. The resin was first washed with lysis buffer, then with 5 column volumes of buffer A (50 mM Tris-HCl pH 8, 1 M NaCl, 5% glycerol, 40 mM imidazole and 5 mM  $\beta$ -mercaptoethanol), and buffer B (50 mM Tris-HCl pH 8, 500 mM NaCl, 5% glycerol, 40 mM imidazole and 5 mM  $\beta$ -mercaptoethanol) on a gravity flow column. Bound RNP was then eluted in elution buffer (50 mM Tris-HCl pH 8, 500 mM NaCl, 5% glycerol, 300 mM imidazole and 5 mM  $\beta$ -mercaptoethanol). Eluted RNP was then dialyzed overnight into dialysis buffer (20 mM Tris-HCl pH 8, 250 mM NaCl, 5% glycerol and 1 mM DTT).

*DinG-HNH protein:* DinG-HNH protein was purified similarly to Cas5-HNH, Cas8-HNH and DinG-HNH-associated effector complexes with the following modifications: buffer A contained 50 mM Tris-HCl pH 8, 500 mM NaCl, 5% glycerol, 40 mM imidazole and 5 mM  $\beta$ -mercaptoethanol, buffer B was the same as lysis buffer, and elution buffer contained 20 mM Tris-HCl pH 8, 250 mM NaCl, 5% glycerol, 300 mM imidazole and 5 mM  $\beta$ -mercaptoethanol.

*Candidate Type VII proteins and RNP complexes:* To purify the candidate type VII Cas7/Cas5 RNP complex and Cas14 protein, cognate crRNAs were cloned into a pET45b(+) vector under control of a T7 promoter by Gibson assembly. The *E. coli* codon optimized operon was synthesized by Twist Biosciences and cloned into the crRNA-containing pET45b(+) backbone by Gibson assembly. A His14 tag was inserted at the N-terminus of the Cas5 gene and a TwinStrep tag was inserted at the N-terminus of the Cas14 gene by Gibson assembly. Proteins were expressed as described above using media supplemented only with 100  $\mu$ g/ml ampicillin and cell paste was resuspended in His lysis buffer for Cas7/Cas5 RNP complexes (50 mM Tris-HCl pH 8, 250 mM NaCl, 5% glycerol, 40 mM imidazole and 5 mM  $\beta$ -mercaptoethanol) or Strep lysis buffer for Cas14 proteins (50 mM Tris-HCl pH 8, 250 mM NaCl, 5% glycerol, 5 mM  $\beta$ -mercaptoethanol). Cells were lysed and lysate was cleared as described, then the soluble fraction was mixed with Ni Sepharose 6 Fast Flow Affinity Chromatography Media (Cytiva) at 4°C for Cas7/Cas5 RNP complexes or Strep-Tactin Superflow Plus resin (Qiagen) at 4°C for Cas14. Each resin was washed on a gravity flow column as described above with the modification for Cas14 that imidazole was removed for all buffers. Bound RNP was then eluted in His elution buffer (50 mM Tris pH 8, 500 mM NaCl, 5% glycerol, 300 mM imidazole and 5 mM  $\beta$ -mercaptoethanol) or Strep elution buffer (50 mM Tris-HCl pH 8, 500 mM NaCl, 5% glycerol, 5 mM desthiobiotin and 5 mM  $\beta$ -mercaptoethanol) as appropriate and dialyzed overnight into dialysis buffer (20 mM Tris-HCl pH 8, 250 mM NaCl, 5% glycerol and 1 mM DTT).

*Cas12 RNP complexes:* To purify Cas12s from the various newly identified Type-V associated systems in complex with cognate ncRNAs, Cas12 genes were either *E. coli* or human codon optimized, synthesized by Twist Biosciences and cloned into a pET45b(+) backbone with a His14-TwinStrep-bdSUMO solubility/affinity tag by Gibson assembly. Cognate predicted CRISPR arrays under expression of synthetic promoters (T7 or pJ23119, as specified) or full loci were similarly cloned into a separate pCOLADuet-1 vector and co-expressed with the cognate Cascade proteins in BL21(DE3) strain (NEB). Cells were grown at 37°C in terrific broth (TB) medium supplemented with 100  $\mu$ g/ml ampicillin and 50  $\mu$ g/ml kanamycin until reaching an optical density (OD600) of 0.4-0.6, then shifted to 18°C and induced with 0.2 mM IPTG overnight. RNPs were then purified as described for Cas5-HNH/Cas8-HNH/DinG-HNH effector complexes above. Instead of dialyzing, RNPs were directly concentrated using Vivaspin 20 columns with a molecular weight cutoff of 50 kDa (Cytiva) and 300  $\mu$ L was taken as input for small RNA-sequencing.

### Small RNA sequencing

*RNPs:* Small RNA sequencing of RNPs was performed as previously described (25). Briefly, 300  $\mu$ L of protein elute was mixed with 900  $\mu$ L TRI reagent (Zymo) and incubated at room temperature for 5 min. 180  $\mu$ L of chloroform (Sigma Aldrich) was added and the samples were mixed gently and incubated at room temperature for an additional 3 min, then spun at 12000xg for 15 min at 4°C. The aqueous phase was used as input for RNA extraction using a Direct-zol RNA miniprep plus kit (Zymo), with in-column DNase treatment. The purified RNA was then

subject to treatment as per manufacturer's instructions with 20 U of T4 PNK (NEB) for 1 hour at 37°C, then 20 U of RNA 5' polyphosphatase (Biosearch Technologies) for 30 min at 37°C, with each enzymatic step followed by cleanup with a Zymo RNA Clean & Concentrator-5 kit as per the manufacturer's instructions. Following enzymatic treatments, purified RNA was subject to library preparation with an NEBNext Multiplex Small RNA Library Prep kit (NEB) as per the manufacturer's instructions, with an extension time of 1 min and 12 cycles in the final PCR. Amplified libraries were gel extracted, quantified by qPCR using a KAPA Library Quantification Kit for Illumina (Roche) on a CFX Opus 384 (BioRad) and sequenced on an Illumina MiSeq with Read 1 45 cycles, Read 2 45 cycles and Index 1 6 cycles. Adapters were trimmed using CutAdapt (79) and mapped to loci of interest using BWA. Filled reads were obtained and filled reads filtered as indicated were visualized using a custom Python script (25).

*Heterologous loci in E. coli:* Small RNA sequencing of heterologous loci in *E. coli* was performed as previously described (25). Briefly, Stbl3 chemically competent *E. coli* were transformed with plasmids containing the locus of interest. A single colony was used to seed a 5 mL overnight culture. Following overnight growth, cultures were spun down, resuspended in 750 µL TRI reagent (Zymo) and incubated for 5 min at room temperature. 0.5 mm zirconia/silica beads (BioSpec Products) were added and the culture was vortexed for approximately 1 minute to mechanically lyse cells. 200 µL chloroform (Sigma Aldrich) was then added and the above protocol was followed with the following modifications: prior to T4 PNK treatment, ribosomal RNA was removed using an NEBNext rRNA depletion kit (Bacteria) (NEB).

*Native expression:* Organisms were obtained from NRRL or ATCC as freeze dried cultures, resuspended in the appropriate media and cultured as follows: *Saccharomoronospora internatus* (Agre et. al.) Greiner-Mai et. al. (ATCC 33517) was grown in ISP Medium 4 at 37°C for 4 days and *Amycolatopsis decaplanensis* (NRRL B-24209) and *Prauserella rugosa* (NRRL B-2295) were grown in GYM Streptomyces media at 28°C for 3 days. RNA was extracted and libraries were prepared as described for “Heterologous loci in *E. coli*” above.

### *In vitro* cleavage assays

*Cas5-HNH and Cas8-HNH cleavage assays:* For dsDNA cleavage, substrates were produced by PCR amplification of pUC19 plasmids containing the target sites and the TAM sequences. Cy3 and Cy5-conjugated DNA oligonucleotides (IDT) were used as primers to generate the labeled dsDNA substrates. For ssDNA cleavage, substrates were ordered as Cy5-conjugated oligonucleotides (IDT). Target cleavage assays contained 8 nM of dsDNA substrate or 25 nM of ssDNA substrate, and RNP in a final 1x reaction buffer of 20 mM Tris pH 8, 50 mM NaCl and 5 mM MgCl<sub>2</sub>. For the Cas8-HNH system, an RNP concentration of approximately 100 nM was used. For the Cas5-HNH system, RNP concentration could not be estimated due to super-stoichiometric levels of the tagged Cas11 protein in the sample. For collateral cleavage assays, conditions an additional 25 nM of FAM-labeled collateral (untargeted) ssDNA was added. Assays were allowed to proceed at 37°C for 1 hour. Reactions were then treated with 1.6 U of Proteinase K (NEB) at room temperature for 15 min, followed by treatment with 1 µL of 10 mg/mL RNase A (Qiagen) for 5 min at room temperature. DNA was resolved by gel electrophoresis on 2% agarose E-gels (Thermo Fisher Scientific) or Novex 10% TBE-Urea gels (Thermo Fisher Scientific) as specified and imaged using a BioRad ChemiDoc imaging system.

*DinG-HNH cleavage assays:* DsDNA substrates were produced by PCR amplification of pUC19 plasmids containing the target sites and the TAM sequences. Cy3 and Cy5-conjugated DNA oligonucleotides (IDT) were used as primers to generate the labeled dsDNA substrates.

Target cleavage assays contained 8 nM of DNA substrate, and 1  $\mu$ M of each specified protein or RNP in a final 1x reaction buffer of 20 mM Tris-HCl pH 8, 50 mM NaCl, 10 mM MgCl<sub>2</sub> and 1 mM ATP. Assays were allowed to proceed at 22°C or temperature as specified for 1 hour. Reactions were then treated with 1.6 U of Proteinase K (NEB) at room temperature for 15 min, followed by treatment with 1  $\mu$ L of 10 mg/mL RNase A (Qiagen) for 5 min at room temperature. DNA was resolved by gel electrophoresis on Novex 10% TBE-Urea polyacrylamide gels (Thermo Fisher Scientific) as specified and imaged using a BioRad ChemiDoc imaging system.

*Candidate Type VII cleavage assays:* Templates for *in vitro* transcription of target RNAs were produced by PCR amplification of pUC19 plasmids containing the target site. RNA was *in vitro* transcribed using the PCR templates with a HiScribe T7 Quick High Yield RNA Synthesis kit (NEB). 50 pmol of target RNA was heated for 3 min at 65°C, then labeled with 100 pmol of pCp-Cy5 (Jena Biosciences) using 68 U T4 RNA ligase 1, ssRNA ligase (High Concentration) (NEB) in a 1X buffer of 50 mM Tris-HCl pH 7.5, 10 mM MgCl<sub>2</sub>, 2 mM DTT, 2 mM ATP and 10% DMSO at 4°C overnight and purified using a Zymo RNA Clean & Concentrator-5 column as per the manufacturer's instructions. Target cleavage assays contained 25 nM of labeled RNA substrate, ~1  $\mu$ M of Cas7/Cas5 RNP and ~2  $\mu$ M of Cas14 protein in a final 1x reaction buffer of 20 mM HEPES pH 8, 100 mM KCl, 40 mM NaCl, 1 mM MgCl<sub>2</sub>, and 1 mM ATP. Collateral cleavage assays contained an additional 25 nM of either ssRNA labeled as described or ssDNA ordered as a Cy5-conjugated oligonucleotide (IDT) along with an unlabeled ssRNA containing the cognate target sequence. Assays were allowed to proceed at 45°C or temperature as specified for 1 hour. Reactions were then treated with 1.6 U of Proteinase K (NEB) at room temperature for 15 min. RNA was resolved by gel electrophoresis on Novex 10% TBE-Urea polyacrylamide gels (Thermo Fisher Scientific) as specified and imaged using a BioRad ChemiDoc imaging system.

#### E. coli transformation spot assays

Stb13 competent cells were transformed with plasmids containing protein(s) of interest and corresponding crRNAs and selected on LB plates with 25 $\mu$ M chloramphenicol and 50 $\mu$ M kanamycin. Overnight cultures in TB were prepared then diluted 1:100 in selective ZymoBroth (Zymo Research) and cultured to an OD<sub>600</sub> of 0.6-0.8 at 37° C at 220 rpm. Competent cells were prepared with a Mix & Go E. Coli transformation kit (Zymo Research) according to developer instructions. 20 $\mu$ L of competent cells were transformed by heat shock with 100 ng pUC19 or plasmids containing an a crRNA target and appropriate PAM and recovered in 80 $\mu$ L of SOC media (Thermo Fisher Scientific) and for 2 hours at 37° C at 220 rpm. Transformed cells were normalized to OD<sub>600</sub> = 0.1 then five 1:10 serial dilutions prepared in TB. 5 $\mu$ L of each dilution were induced on LB plates with 25 $\mu$ M chloramphenicol, 50 $\mu$ M kanamycin, 100 $\mu$ M ampicillin and 0.1mM IPTG then incubated 24 hours at 37° C. Plates were imaged with a BioRad ChemiDoc imaging system.

#### Sanger sequencing of cleavage sites

*In vitro* cleavage assays were performed as described above and products were run on 2% agarose E-gels (Invitrogen) and cleaved products were extracted using a QIAquick gel extraction kit (Qiagen). Gel extracted cleavage products were submitted for Sanger sequencing by Genewiz/Azenta Life Sciences using primers 5'-

AGTCACGACGTTGTAAAACGACGGCCAGTG-3' for the non-target strand and 5'-TCATTAGGCACCCCAGGCTTTAC-3' for the target strand.

#### Mammalian cell culture and transfection

Mammalian cell culture experiments were performed in the HEK293FT line (Thermo Fisher Scientific) grown in Dulbecco's Modified Eagle Medium with high glucose, sodium pyruvate, and GlutaMAX (Thermo Fisher Scientific), additionally supplemented with 1× penicillin–streptomycin (Thermo Fisher Scientific), 10 mM HEPES (Thermo Fisher Scientific), and 10% fetal bovine serum (VWR Seradigm). All cells were maintained at confluency below 80%.

Unless otherwise indicated, all transfections were performed with Lipofectamine 3000 (Thermo Fisher Scientific). Cells were plated 16-20 hours prior to transfection to ensure 90% confluency at the time of transfection. For 96-well plates, cells were plated at 20,000 cells/well. For each well on the plate, transfection plasmids were combined with 2 µL P3000 transfection enhancer (Thermo Fisher Scientific) per 1 µg DNA and OptiMEM I Reduced Serum Medium (Thermo Fisher Scientific) to a total of 25 µL. Separately, 23 µL of OptiMEM was combined with 2 µL of Lipofectamine 2000. Plasmid/P3000 and Lipofectamine solutions were then combined and pipetted onto cells.

For off-target genome editing, cells were plated in 12-well plates at 200,000 cells/well 16-20 hours prior to transfection to ensure 90% confluency at the time of transfection. To transfect, 200 ng of each protein expression plasmid and 500 ng of each crRNA expression plasmid per well were combined with OptiMEM I Reduced Serum Medium (Thermo Fisher Scientific) up to 250 µL. Separately, 5 µL of GeneJuice transfection reagent (EMD Millipore) was combined with 245 µL OptiMEM I Reduced Serum Medium (Thermo Fisher Scientific). DNA and GeneJuice mixes were combined to a final volume of 500 µL and pipetted onto cells.

#### Mammalian genome editing

crRNA scaffold backbones were cloned into a pUC19-based human U6 expression backbone by Gibson Assembly. To clone guides, oligos with appropriate overhangs were synthesized by Genewiz, annealed and phosphorylated using T4 PNK (NEB) and cloned into crRNA backbones by restriction-ligation cloning. To clone protein expression constructs, *E. coli* codon optimized genes were cloned into a CMV expression backbone by Gibson assembly using 2X Gibson Assembly Master Mix (NEB) to generate pCMV-FLAG-SV40-Cas protein constructs.

50 ng each protein expression plasmid and 100 ng crRNA expression plasmid were transfected in each of 4 wells as biological replicates in a 96-well plate for each guide condition as described. An empty protein expression plasmid was used for dropout experiments as indicated. After 60-72 hours, genomic DNA was harvested by washing the cells once in 1xDPBS (Sigma Aldrich) and adding 50 µL QuickExtract DNA Extraction Solution (Lucigen). Cells were scraped from the plates to suspend in QuickExtract and cycled at 65°C for 15 min, 68°C for 15 min then 95°C for 10 min to lyse cells. 2.5 µL of lysed cells were used as input into each PCR reaction. For library amplification, target genomic regions were amplified and with a 12-cycle PCR using NEBNext High Fidelity 2X PCR Master Mix (NEB) with an annealing temperature of 63°C for 15 s, followed by a second 18-cycle round of PCR to add Illumina adapters and barcodes. The libraries were gel extracted and subject to single-end sequencing on an Illumina MiSeq with Read 1 300 cycles, Index 1 8 cycles, Index 2 8 cycles.

Insertion/deletion (indel) frequency was analyzed using CRISPResso2 (80). In order to eliminate noise from PCR and sequencing error, only indels with at least 2 reads or more than 1



base inserted or deleted were counted towards reported indel frequencies. To assess statistical significance, 2-tailed T-tests were performed using non-targeting guide/crRNA conditions as a negative control.

#### Off-target genome editing analysis

Off-target genome editing was analyzed by tagmentation-based tag integration site sequencing (TTISS) (41). Briefly, donor oligos (5'-phospho-G\*T\*T\*GTGAGCAAGGGCGAGGAGGATAACGCCTCTCTCCCAGCGACT\*A\*T-3' and 5'-phospho-A\*T\*AGTCGCTGGGAGAGAGGCGTTATCCTCCTCGCCCTTGCTCACA\*A\*C-3', where \* indicates a phosphorothioate modification) were annealed duplex buffer (30 mM HEPES pH 7.5, 100 mM KAc) at a final concentration of 10  $\mu$ M per oligo by incubating in a thermocycler at 95°C for 5 s, then ramping down to 4°C at  $\sim$ 0.1°C/s. Cells were transfected as described in “Mammalian cell culture and transfection” above. 72-96 hours after transfection, cells were harvested by washing each well with 1 mL PBS (Sigma Aldrich), then dry trypsinizing with 200  $\mu$ L of TrypLE Express Enzyme (no phenol red) (Thermo Fisher Scientific) and resuspended in 1 mL PBS (Sigma Aldrich). Cell samples were then centrifuged at 300xg for 5 min at 4°C to pellet and resuspended in 200  $\mu$ L PBS (Sigma Aldrich). A DNeasy Blood & Tissue kit (Qiagen) was used to extract genomic DNA as per the manufacturer’s instructions.

Genomic DNA was then tagmented by mixing 1 $\mu$ g DNA with Tn5 enzyme and TAPS buffer in a final volume of 100  $\mu$ L and heating to 55°C for 10 min. The tagmentation reactions were mixed with 500  $\mu$ L of PB Binding buffer (Qiagen) and purified using a Qiaquick spin column (Qiagen). 10  $\mu$ L of purified tagmented DNA was input into 2 rounds of PCR to add Illumina handles using 2X KOD Hot Start PCR master mix (EMD Millipore). The final libraries were gel extracted, quantified with a KAPA Library Quantification Kit (Roche), mixed with 10% PhiX Sequencing Control V3 (Illumina) and loaded on an Illumina NextSeq with the following read parameters: Read 1 59 cycles, Index 1 8 cycles, Read 2 25 cycles.

Off-target sites were identified by mapping reads to the hg38 assembly of the human genome using BrowserGenome.org as described (41). Identified sites were then filtered for those containing a continuous sequence with up to 1/3 of bases mismatched to the guide sequence and up to 1 mismatch in the PAM sequence to identify “true” off-target cleavage events.

#### Size exclusion chromatography

Candidate Type VII Cas7/Cas5 complexes were purified as described, with the following modifications: buffer A contained 500 mM NaCl, buffer B contained 250 mM NaCl, and elution buffer contained 250 mM NaCl. The elution was directly diluted into to achieve a final concentration of 20 mM Tris-HCl pH 8, 150 mM NaCl, 100 mM imidazole and 3.6 % glycerol. The sample was concentrated to 500  $\mu$ L using a Vivaspin 20 column with a molecular weight cutoff of 50 kDa (Cytiva) and purified through a Superose 6 Increase 10/300 GL column (Cytiva) in 20 mM Tris-HCl pH 8, 150 mM NaCl, 1% glycerol. Fractions were collected and analyzed by SDS-PAGE gel electrophoresis.

## Supplementary text. Extended discussion of FLSHclust algorithm

Hash-based clustering algorithms divide objects into a set of elements that can be matched individually using hash functions. With proteins, a hash function bucketing scheme allows grouping proteins that share kmers. However, the efficiency of kmer-based grouping for linear time clustering decreases as sequence identity between proteins drops because kmer bucketing requires long strings of identical consecutive matches. Thus, the technique becomes less effective in grouping proteins that share low sequence similarity.

Locality sensitive hashing (LSH) is a well-established technique for approximate nearest neighbor matching (81). By expanding a single hash function into a family of hash functions, LSH allows for inexact matching of elements at the cost of false negatives, false positives, and extra computational time (Fig. 1D). While LSH eliminates the need for long consecutive identical sequence matches, the high number of false negatives can adversely affect clustering performance by causing missed matches. However, a recent theorem for binary LSH functions (functions acting on 01 bit vectors) demonstrates the possibility of implementing these functions in a way that guarantees the absence of binary LSH families that have no false negatives (14). We applied this theorem to the case of string kmers to generate false negative-free kmer LSH families and subsequently developed the FLSHclust algorithm. Using Markov-Chain Monte Carlo, we generated kmer LSH functions with no false negatives. To do so for a specific kmer length,  $k$ , we enumerated all possible combinations of mismatch positions up to  $r$  and computed a loss equal to the number of mismatch combinations that go undetected using the entire set of hash functions. The hash functions are then perturbed using MCMC until the loss converges.

The FLSH clustering algorithm is then constructed as follows: first, all amino acids are compressed to a reduced alphabet that groups similar amino acids together. Next, all kmers of size  $k$  are extracted from each protein. Then, for each hash function, all kmers are mapped to buckets using the output of the hash function applied to the kmers. 2 representative sequences are deterministically selected per bucket to be temporary cluster centers. All sequences in the bucket are then retrieved and aligned against the cluster centers. A graph edge is formed if the alignment between the two sequences satisfies the clustering sequence identity and minimum coverage criteria. The resulting graph of edges is then simplified using a local density-based transformation that removes weak links that would otherwise create long chains of unrelated sequences in the graph. Next, a community detection algorithm is applied to form groups of sequences. For simplicity, a PREGEL implementation of the breadth first connected components algorithm is used; however notably other algorithms could be used in this place instead, such as the Leiden algorithm (82). The most hub-like sequence from each group is selected as the initial cluster center and all sequences in the group are realigned to the initial cluster center forming new edges. Each group of sequences is then clustered using greedy clustering using the new subgraph. To increase parallelizability, the FLSHclust algorithm replaces the global greedy clustering stage included in LinClust (11) with a parallelized graph simplification and community detection algorithm followed by local greedy clustering within each detected community (Fig. 1E). The algorithm is parallelizable and is bottlenecked by the maximum size of the detected communities. We implemented FLSHclust in Apache Spark, employing Apache Arrow for in-memory access to enhance fault tolerance and scalability on distributed commodity clusters. Other implementations aimed at speed as opposed to fault tolerance may yield performance improvements in other computing environments.

Fig. S1.

A

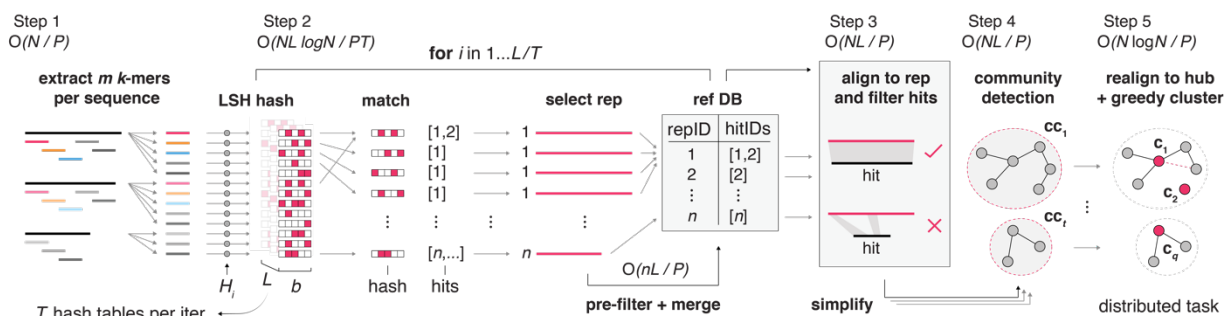

B

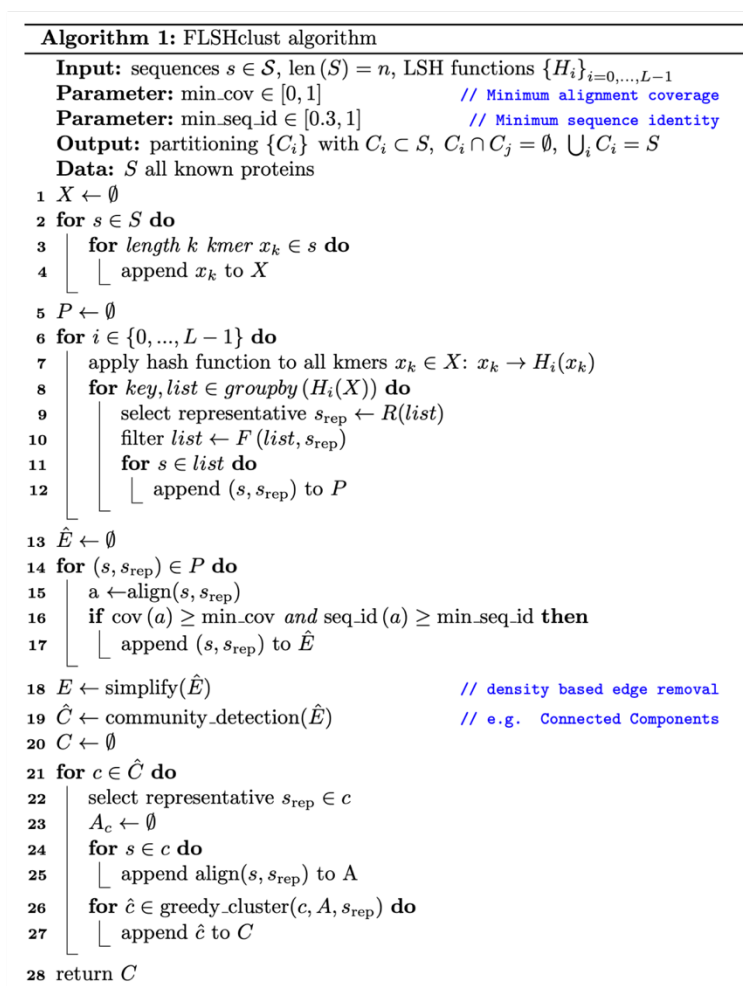

Fig. S1. Complete FLSHclust algorithm

(A) Complete outline of the FLSHclust algorithm. Unlike with typical LSH, which often requires materializing the entire set of  $L$  hash tables, FLSHclust only needs to materialize one hash table at a time, storing all potential matches in a reference database. As memory and disk space

permits, up to  $T$  hash tables can be materialized per iteration, potentially reducing runtime. Time complexities shown (big O notation) are assuming the use of hash join implementations, however if merge join implementations are used, additional logarithmic factors are included in Step 2.  $N$  is the number of sequences.  $L$  is the number of hash functions.  $P$  is the parallel speedup that can be obtained using the given number of processors. **(B)** Pseudocode of the FLSHclust algorithm.

Fig. S2.

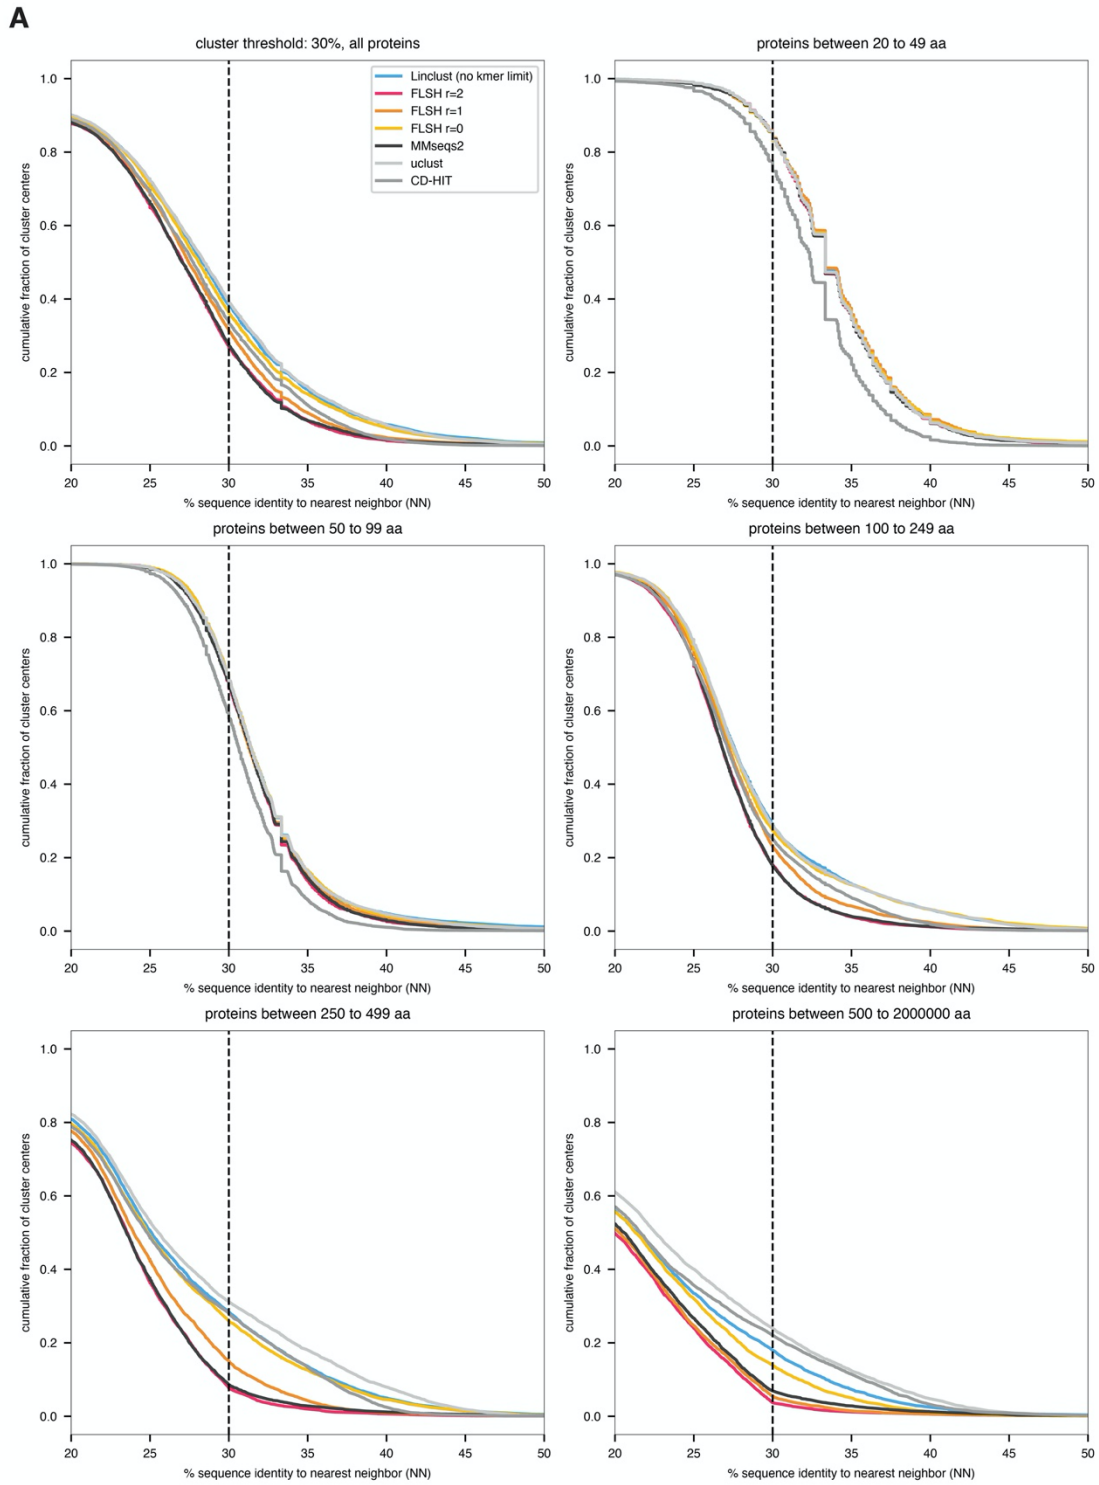

Fig. S2. (cont'd)

B

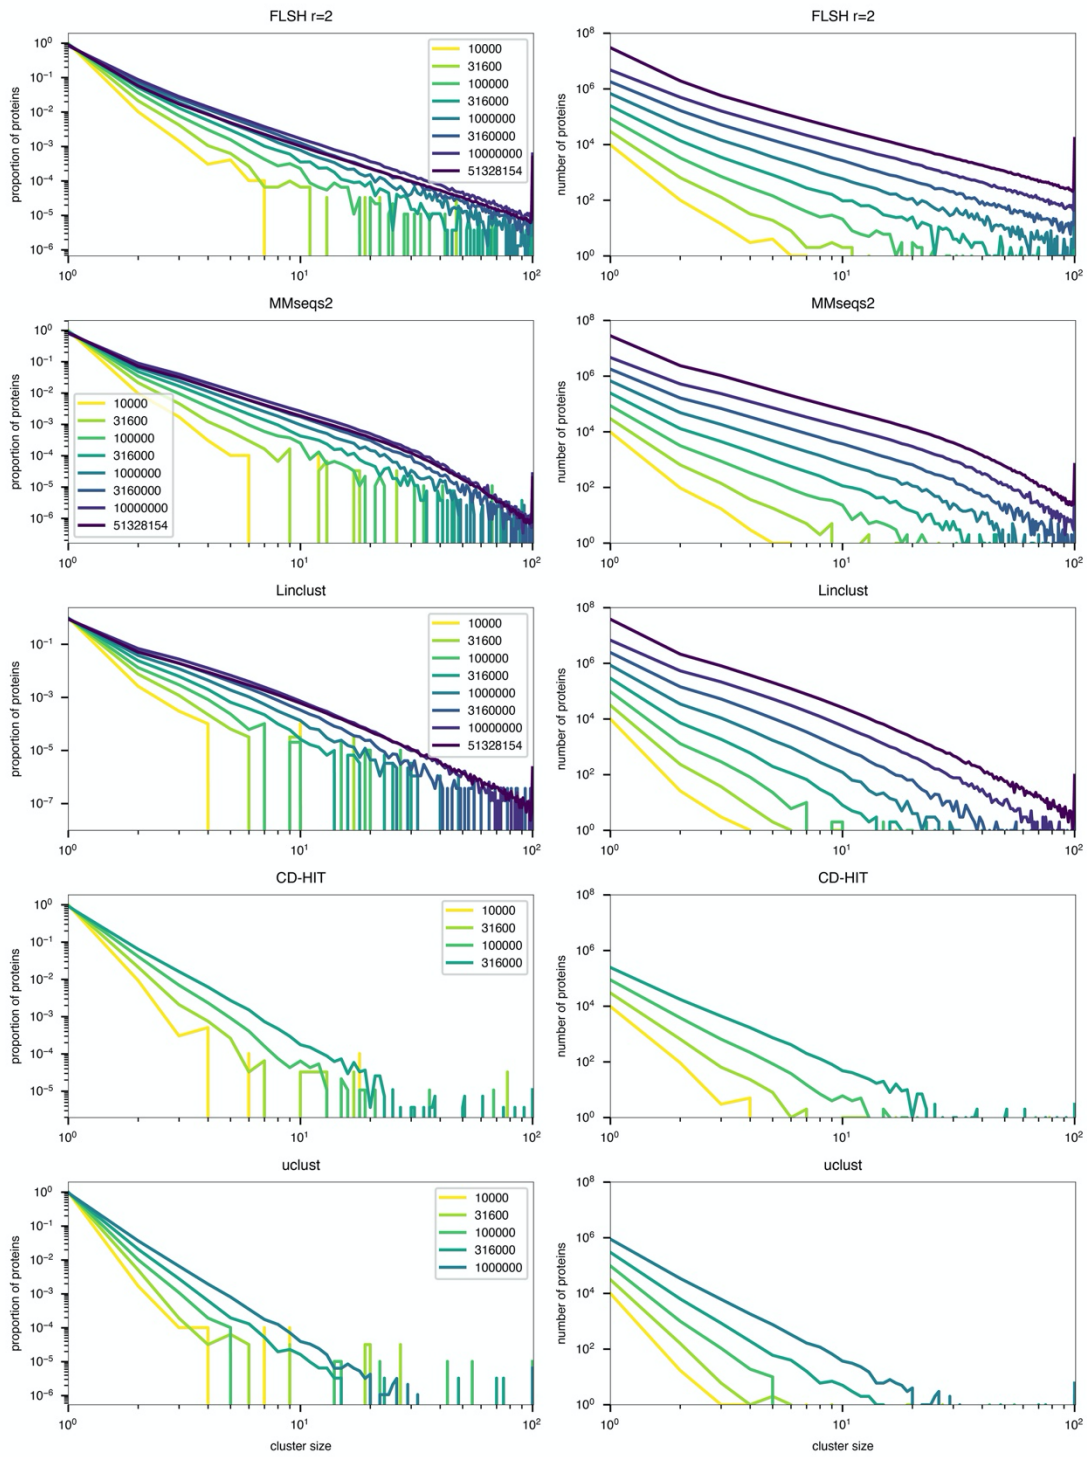

Fig. S2. (cont'd)

C

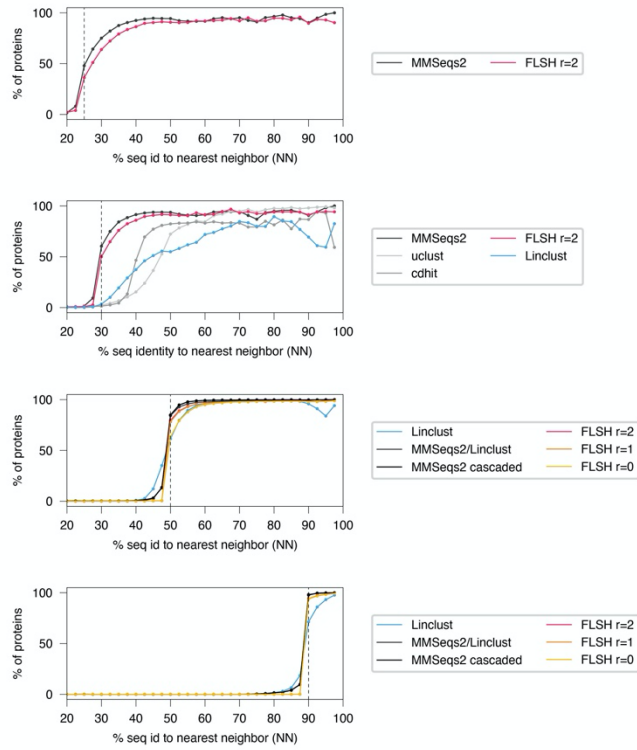

Fig. S2. (cont'd)

D

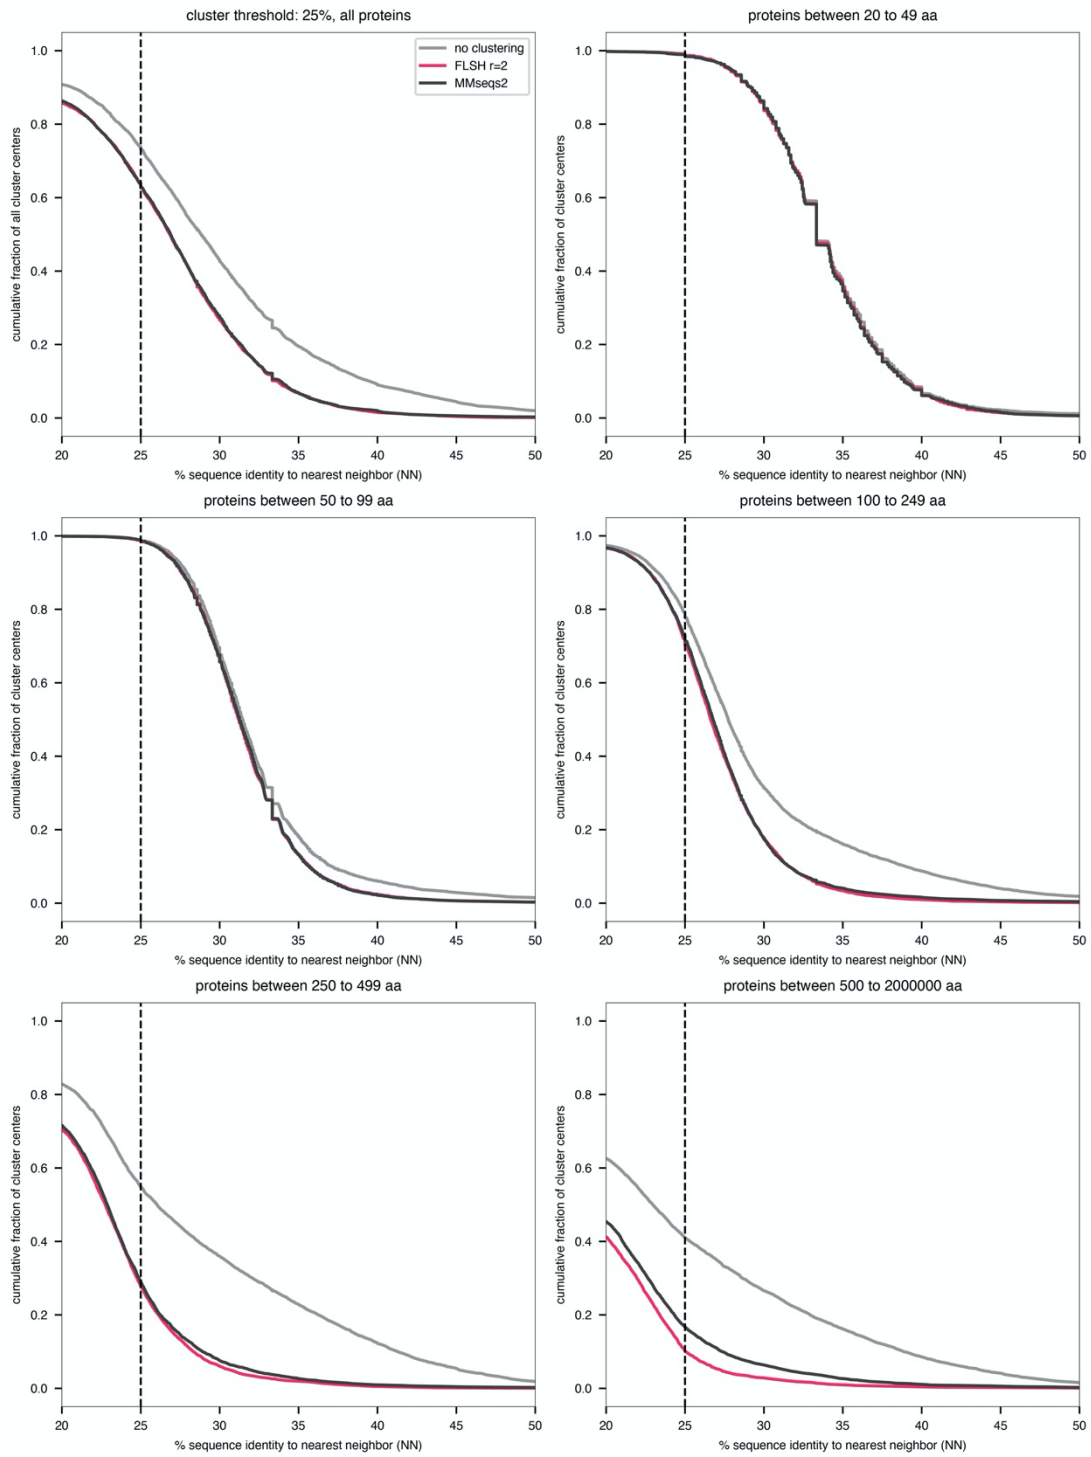



**Fig. S2. (cont'd)**

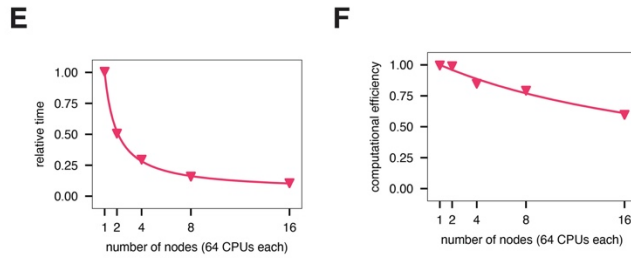

**Fig. S2. Empirical scaling and benchmarking of FLSHclust vs other clustering algorithms**

**(A)** Comparison of inter cluster distances for clustering the UniRef50 1M sample at 30% sequence identity. For each method, a random sample of 5000 cluster representatives were selected and aligned to all other cluster representatives from that clustering outcome. Then, the cumulative distribution of the nearest (non-self) neighbor distances were plotted. Separately, the analysis was performed for different subsets of cluster centers satisfying a given protein size range. **(B)** Distribution of cluster sizes for various clustering methods as a function of the number of input sequences from UniRef50. **(C)** Clustering performance for different clustering tasks (from top to bottom: UniRef50 1M sample at 25% sequence identity, UniRef50 1M sample at 30% sequence identity, UniRef90 1M sample at 50% sequence identity, UniRef100 1M sample at 90% sequence identity). Dotted vertical black line indicates the target clustering threshold. For FLSHclust,  $r$ , references the target number of mismatches in the FLSH kmer comparison step, with a larger  $r$  corresponding to exponentially more hash functions ( $r=0$  uses 1 hash function,  $r=1$  uses 6 hash functions,  $r=2$  uses 24 hash functions). **(D)** same as **(A)**, but for the target clustering threshold of 25% sequence identity. **(E)**. Relative time required for FLSHclust to complete clustering the 3.62as as a function of number of compute nodes (each with 64 CPUs, 512 GB of memory and 2TB of RAM). **(F)** Parallel computation efficiency for FLSHclust as a function of the number of compute nodes.

Fig. S3.

A

| dr_len | spacer_len | p_mismatch | indel_rel_range | p_indel | p_spacer_similarity | spacer_indel_rel_range | p_spacer_indel | condition_group |
|--------|------------|------------|-----------------|---------|---------------------|------------------------|----------------|-----------------|
| 0      | 37         | 30         | 0.00            | 0.0     | 0.0                 | 0.3                    | 0.3            | 1.0             |
| 1      | 37         | 30         | 0.05            | 0.0     | 0.0                 | 0.3                    | 0.3            | 1.0             |
| 2      | 37         | 30         | 0.10            | 0.0     | 0.0                 | 0.3                    | 0.3            | 1.0             |
| 3      | 37         | 30         | 0.20            | 0.0     | 0.0                 | 0.3                    | 0.3            | 1.0             |
| 4      | 37         | 30         | 0.00            | 0.1     | 0.2                 | 0.3                    | 0.3            | 1.0             |
| 5      | 37         | 30         | 0.00            | 0.1     | 0.4                 | 0.3                    | 0.3            | 1.0             |
| 6      | 37         | 30         | 0.00            | 0.1     | 0.6                 | 0.3                    | 0.3            | 1.0             |
| 7      | 37         | 30         | 0.00            | 0.1     | 0.8                 | 0.3                    | 0.3            | 1.0             |
| 8      | 37         | 30         | 0.10            | 0.1     | 0.2                 | 0.3                    | 0.3            | 1.0             |
| 9      | 37         | 80         | 0.10            | 0.1     | 0.2                 | 0.3                    | 0.3            | 1.0             |
| 10     | 20         | 30         | 0.10            | 0.1     | 0.2                 | 0.3                    | 0.3            | 1.0             |
| 11     | 72         | 30         | 0.10            | 0.1     | 0.2                 | 0.3                    | 0.3            | 1.0             |
| 12     | 128        | 30         | 0.10            | 0.1     | 0.2                 | 0.3                    | 0.3            | 1.0             |
| 13     | 256        | 30         | 0.10            | 0.1     | 0.2                 | 0.3                    | 0.3            | 1.0             |
| 14     | 400        | 60         | 0.20            | 0.1     | 0.2                 | 0.3                    | 0.3            | 1.0             |
| 15     | 20         | 30         | 0.00            | 0.0     | 0.0                 | 0.3                    | 0.3            | 1.0             |
| 16     | 30         | 30         | 0.05            | 0.0     | 0.0                 | 0.3                    | 0.3            | 1.0             |
| 17     | 24         | 30         | 0.05            | 0.0     | 0.0                 | 0.3                    | 0.3            | 1.0             |
| 18     | 42         | 30         | 0.05            | 0.0     | 0.0                 | 0.3                    | 0.3            | 1.0             |
| 19     | 10         | 5          | 0.00            | 0.0     | 0.0                 | 0.3                    | 0.3            | 1.0             |
| 20     | 20         | 5          | 0.00            | 0.0     | 0.0                 | 0.3                    | 0.3            | 1.0             |
| 21     | 30         | 5          | 0.00            | 0.0     | 0.0                 | 0.3                    | 0.3            | 1.0             |
| 22     | 40         | 5          | 0.00            | 0.0     | 0.0                 | 0.3                    | 0.3            | 1.0             |
| 23     | 50         | 5          | 0.00            | 0.0     | 0.0                 | 0.3                    | 0.3            | 1.0             |
| 24     | 60         | 5          | 0.00            | 0.0     | 0.0                 | 0.3                    | 0.3            | 1.0             |
| 25     | 70         | 5          | 0.00            | 0.0     | 0.0                 | 0.3                    | 0.3            | 1.0             |
| 26     | 80         | 5          | 0.00            | 0.0     | 0.0                 | 0.3                    | 0.3            | 1.0             |
| 27     | 10         | 10         | 0.00            | 0.0     | 0.0                 | 0.3                    | 0.3            | 1.0             |
| 28     | 20         | 10         | 0.00            | 0.0     | 0.0                 | 0.3                    | 0.3            | 1.0             |
| 29     | 30         | 10         | 0.00            | 0.0     | 0.0                 | 0.3                    | 0.3            | 1.0             |
| 30     | 40         | 10         | 0.00            | 0.0     | 0.0                 | 0.3                    | 0.3            | 1.0             |
| 31     | 50         | 10         | 0.00            | 0.0     | 0.0                 | 0.3                    | 0.3            | 1.0             |
| 32     | 60         | 10         | 0.00            | 0.0     | 0.0                 | 0.3                    | 0.3            | 1.0             |
| 33     | 70         | 10         | 0.00            | 0.0     | 0.0                 | 0.3                    | 0.3            | 1.0             |
| 34     | 80         | 10         | 0.00            | 0.0     | 0.0                 | 0.3                    | 0.3            | 1.0             |

B

| Program      | Condition    | Parameters                                                        |
|--------------|--------------|-------------------------------------------------------------------|
| CRT          | CRT_1        | minNR=3, minRL=16, maxRL=38, minSL=16, maxSL=48                   |
| CRT          | CRT_2        | minNR=3, minRL=16, maxRL=128, minSL=16, maxSL=128                 |
| CRT          | CRT_3        | minNR=3, minRL=16, maxRL=256, minSL=16, maxSL=128                 |
| CRT          | CRT_4        | minNR=3, minRL=16, maxRL=512, minSL=16, maxSL=128                 |
| PILER-CR     | PILER_1      | minarray=3, mincons=0.9, minid=0.94, maxrepeat=64, maxspacer=64   |
| PILER-CR     | PILER_2      | minarray=3, mincons=0.9, minid=0.94, maxrepeat=128, maxspacer=128 |
| PILER-CR     | PILER_3      | minarray=3, mincons=0.9, minid=0.94, maxrepeat=256, maxspacer=256 |
| PILER-CR     | PILER_4      | minarray=3, mincons=0.8, minid=0.85, maxrepeat=512, maxspacer=128 |
| PILER-CR     | PILER_5      | minarray=3, mincons=0.8, minid=0.85, maxrepeat=128, maxspacer=128 |
| CRISPRDetect | CRISPRDetect | ALL DEFAULT PARAMETERS                                            |
| CRISPRFinder | CRISPRFinder | ALL DEFAULT PARAMETERS                                            |
| CRONUS       | CRONUS_1     | seed_size=11, min_len=16, minid=90, max_repeat_size=256           |
| CRONUS       | CRONUS_2     | seed_size=5, min_len=16, minid=80, max_repeat_size=128            |
| CRONUS       | CRONUS_3     | seed_size=11, min_len=16, minid=80, max_repeat_size=256           |
| CRONUS       | CRONUS_4     | seed_size=11, min_len=16, minid=80, max_repeat_size=512           |

C

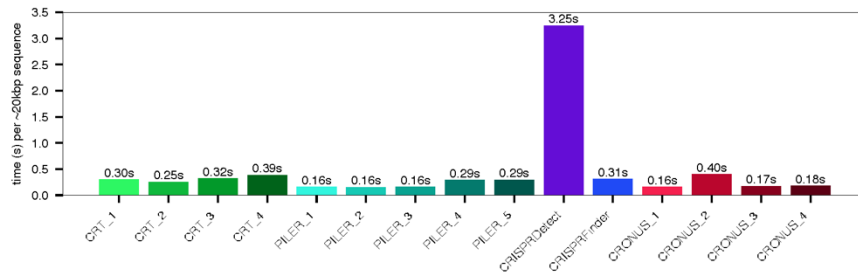

Fig. S3 (cont'd)

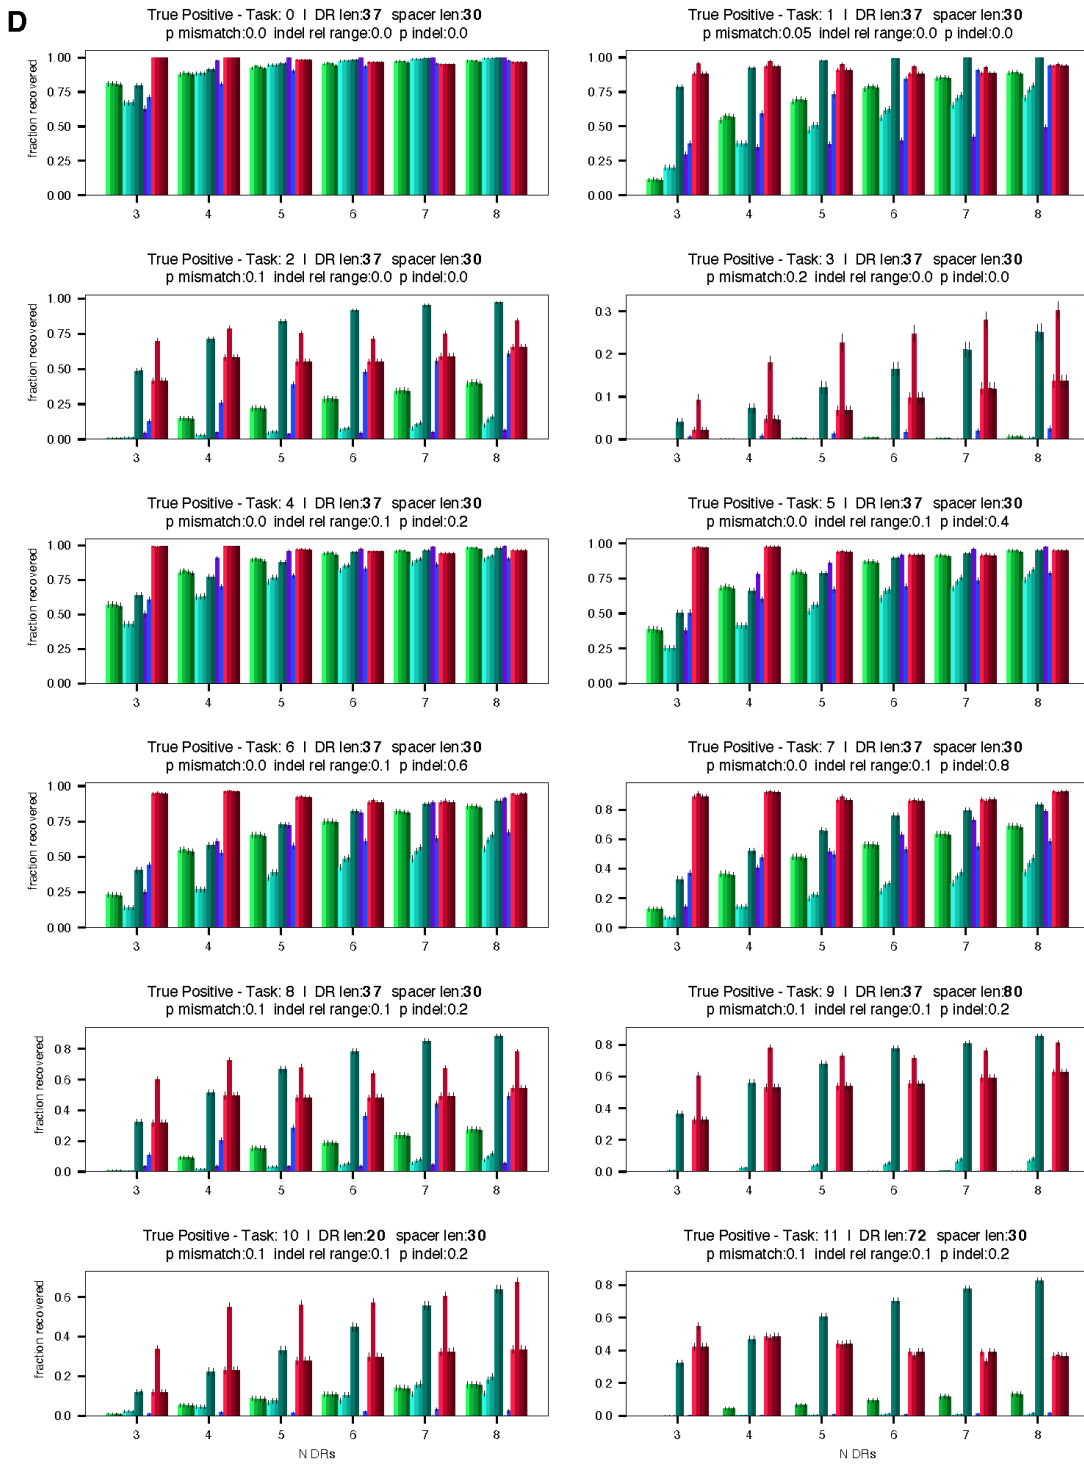

**Fig. S3 (cont'd)**

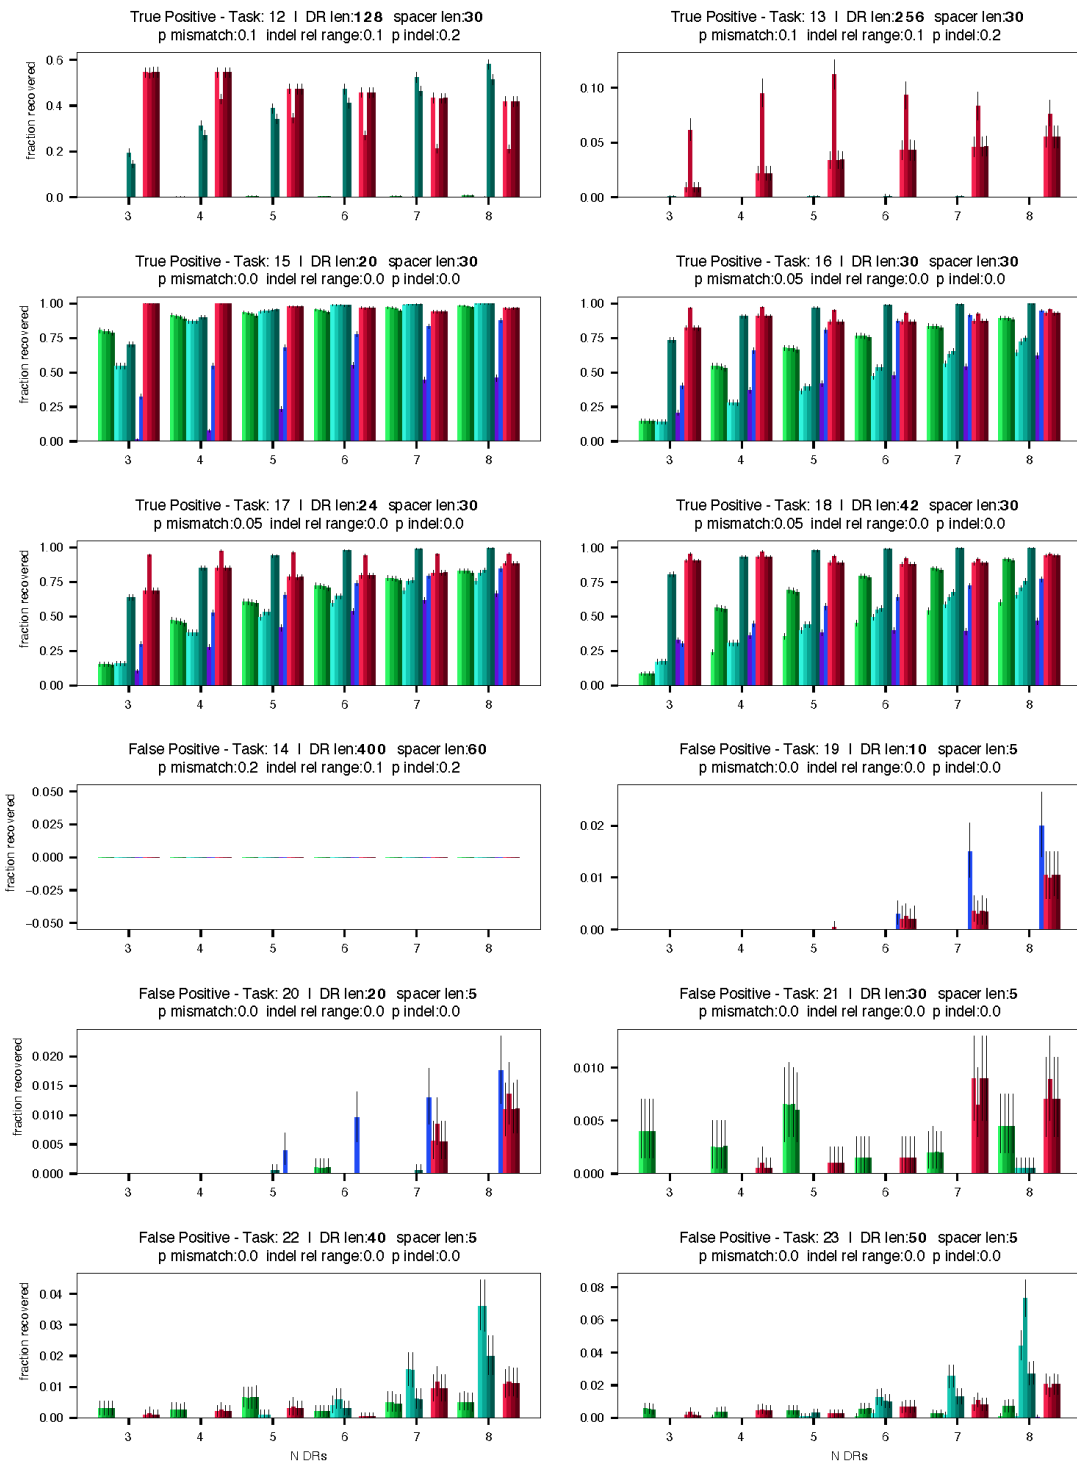

Fig. S3 (cont'd)

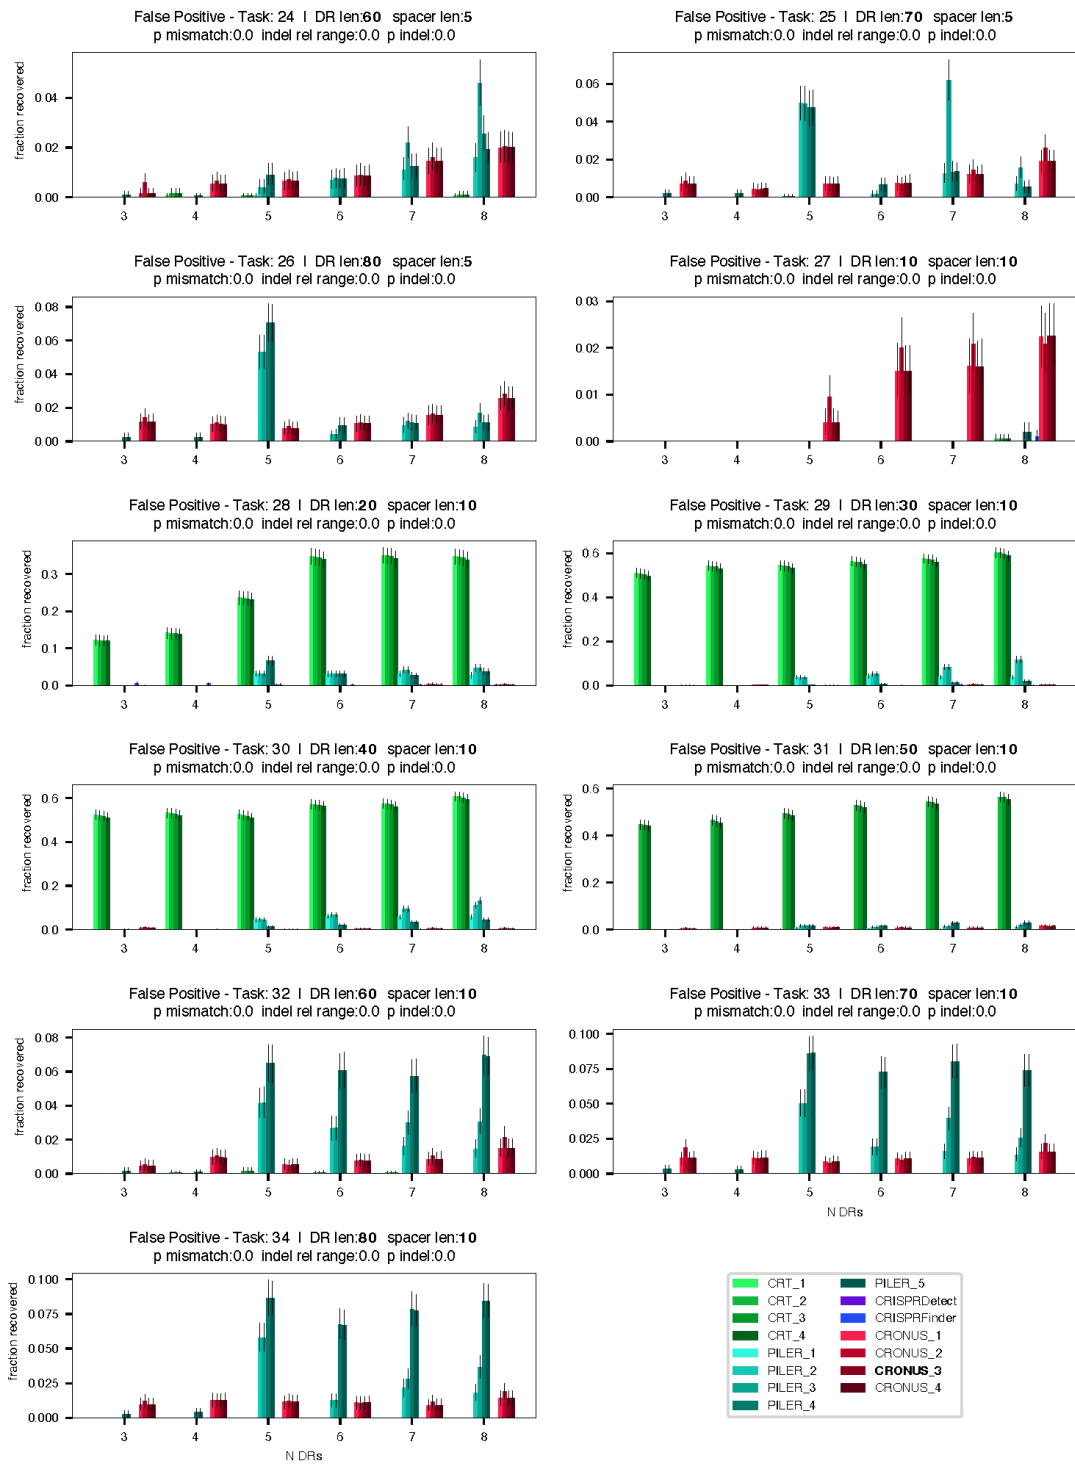

Fig. S3 (cont'd)

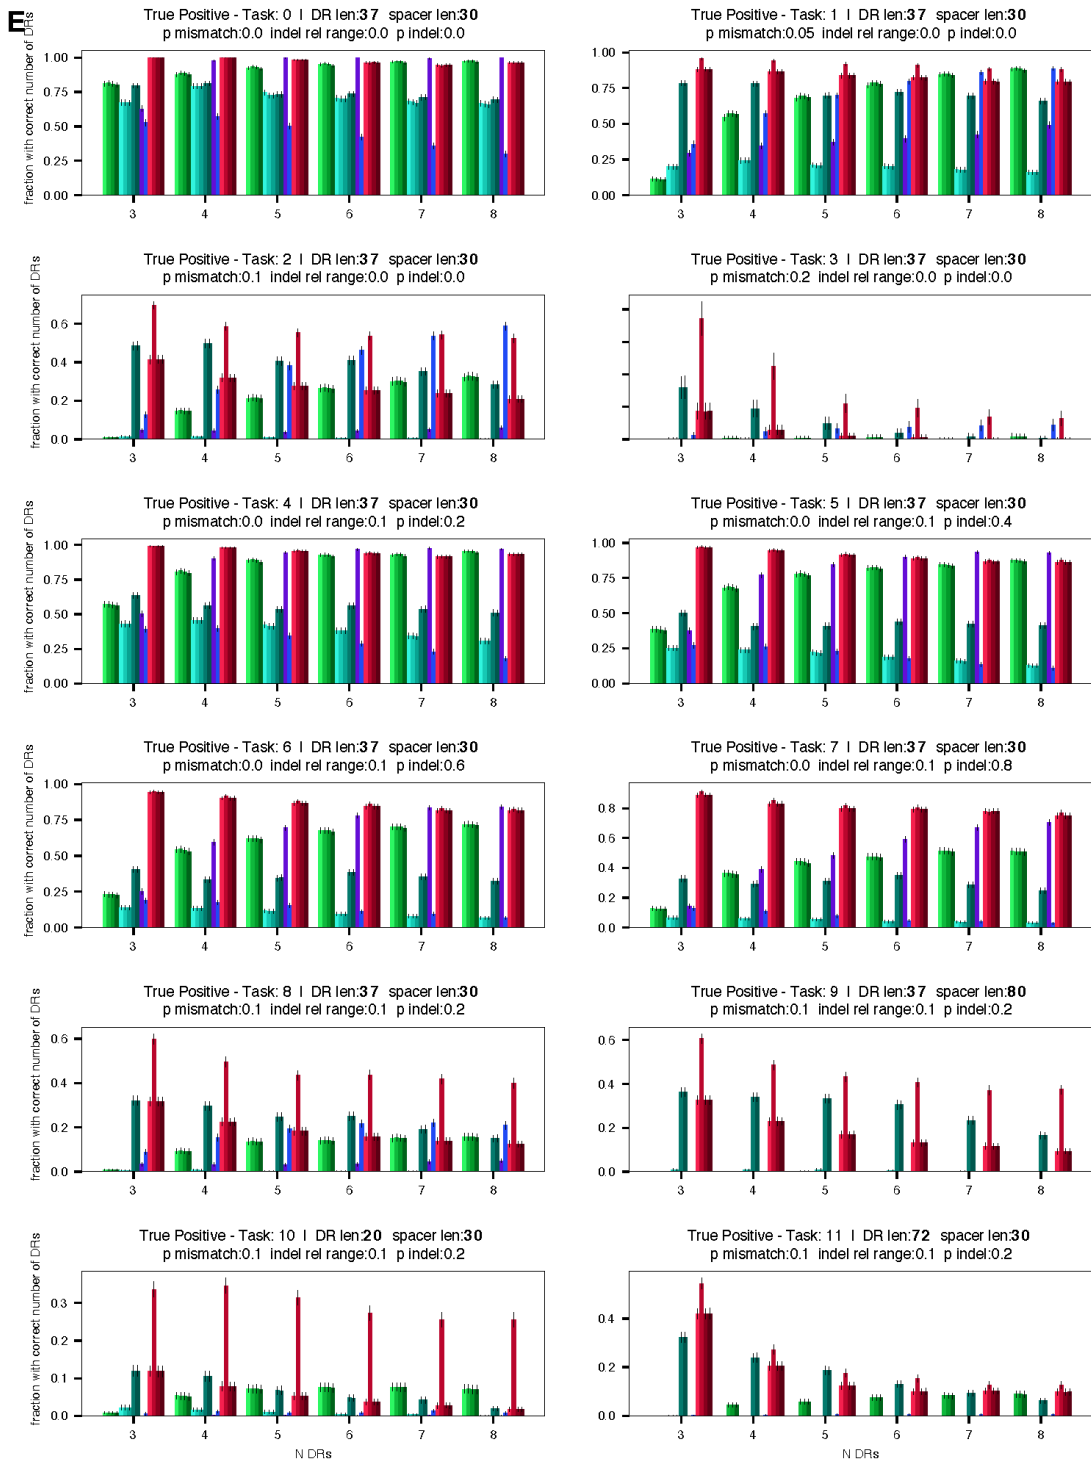

**Fig. S3 (cont'd)**

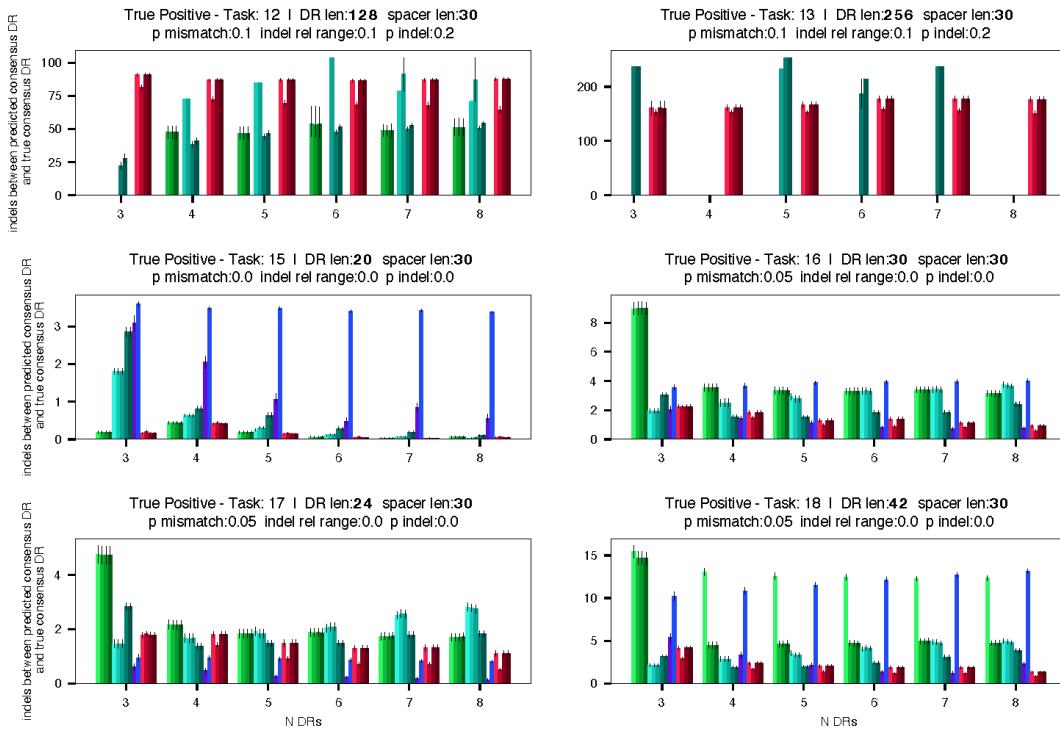

Fig. S3 (cont'd)

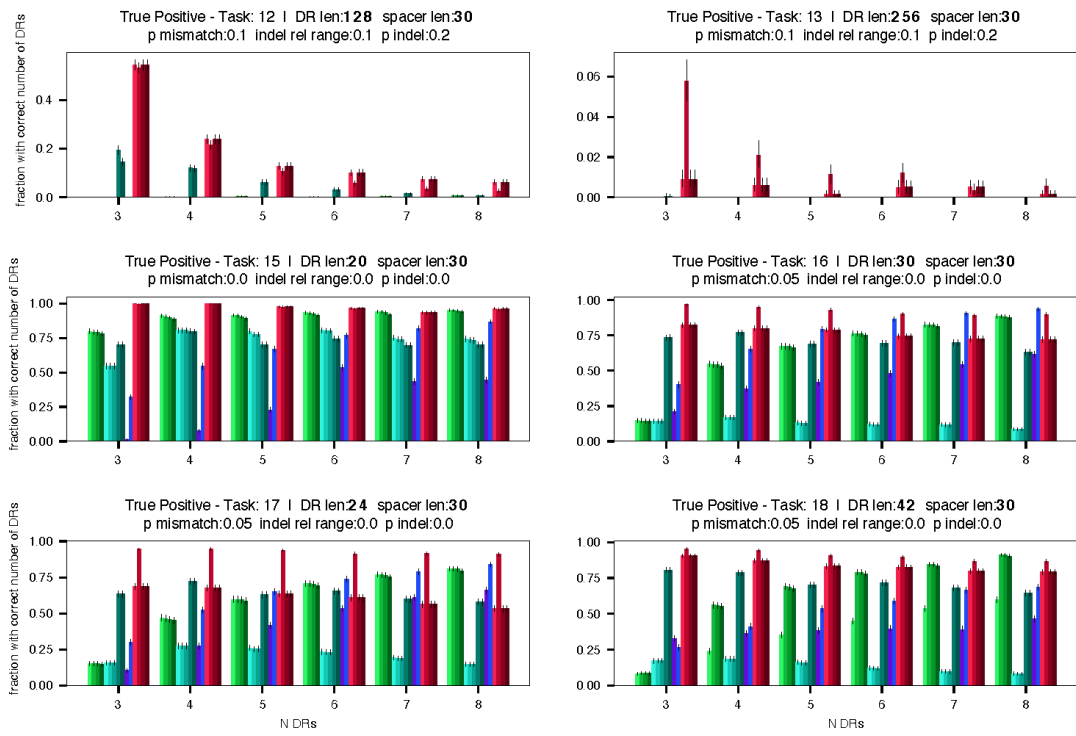



Fig. S3 (cont'd)

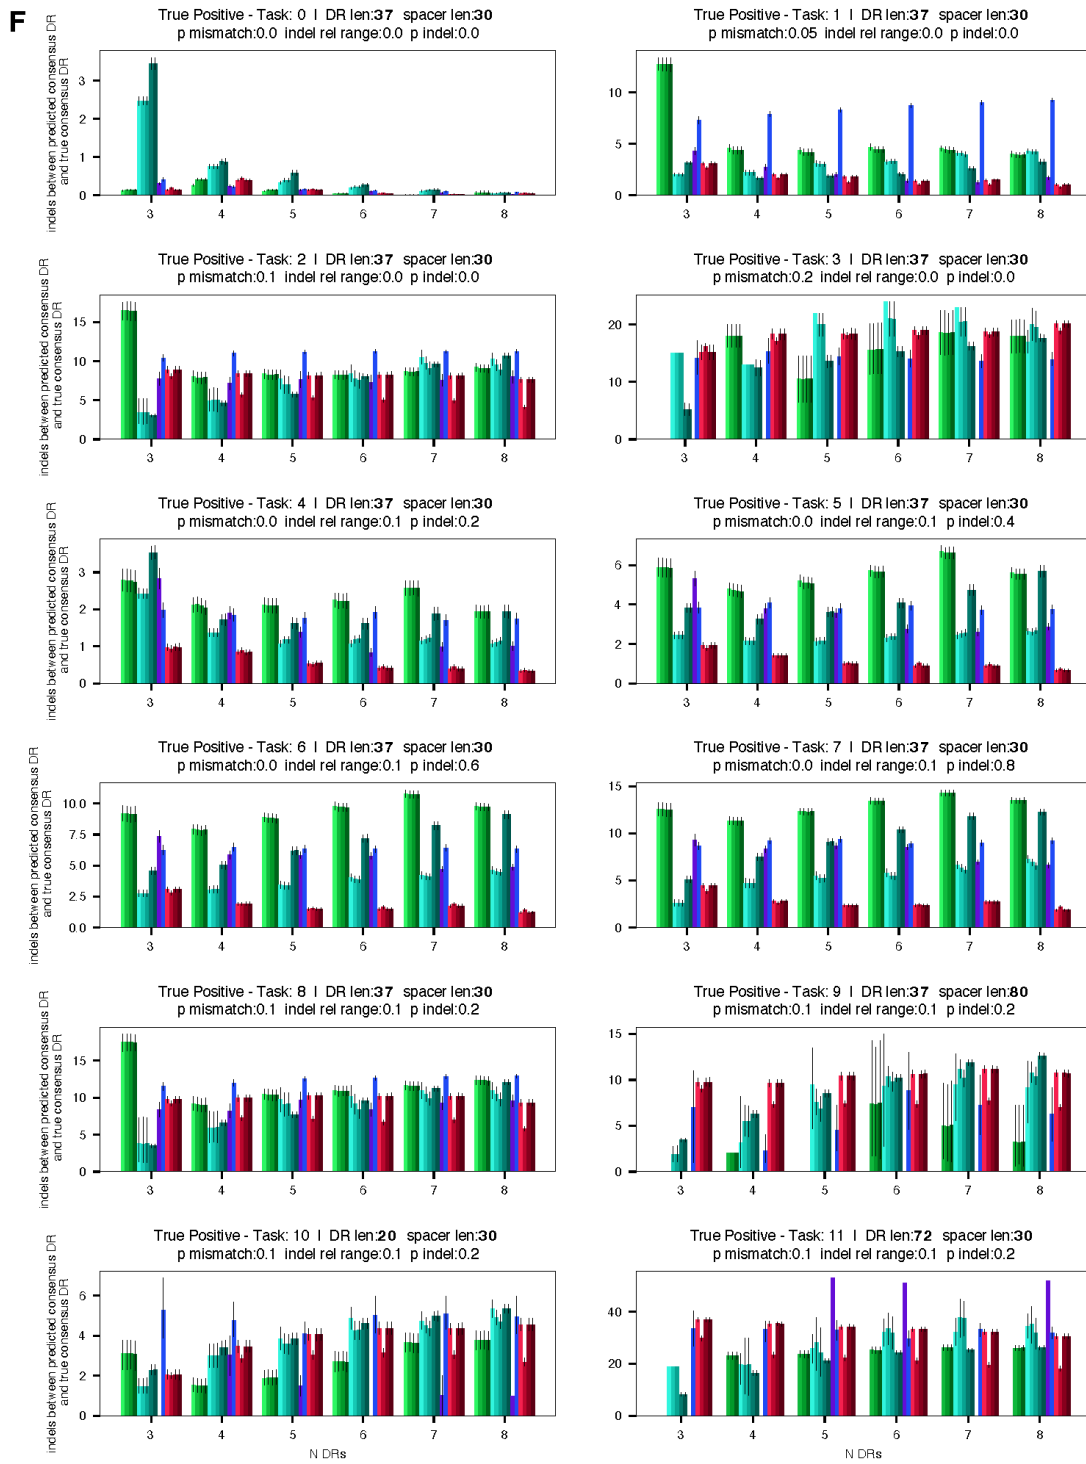

**Fig. S3. Performance benchmarks of various CRISPR finders against synthetically generated CRISPRs**

**(A)** Description of all parameter sets used for generating the 35 synthetic CRISPR array datasets. **(B)** Description of all of the CRISPR finder tools and their tested parameters for the benchmark along with their id/label (condition column). **(C)** Average runtime per ~20kb sequence for each of the CRISPR prediction tools. **(D)** Average recovery rates of all tools vs each of the synthetic CRISPR datasets. True Positives (real CRISPR-like arrays) vs False Positives (tandem repeats) are differentiated in the subplot titles. Error bars show 95% confidence bounds as determined by bootstrap with 2000 bootstraps. **(E)** Average fraction of correctly predicted number of DRs with error bars as in **(D)**. **(F)** average number of indels between predicted CRISPR DR and true CRISPR DR with error bars as in **(D)**.

**Fig. S4.**

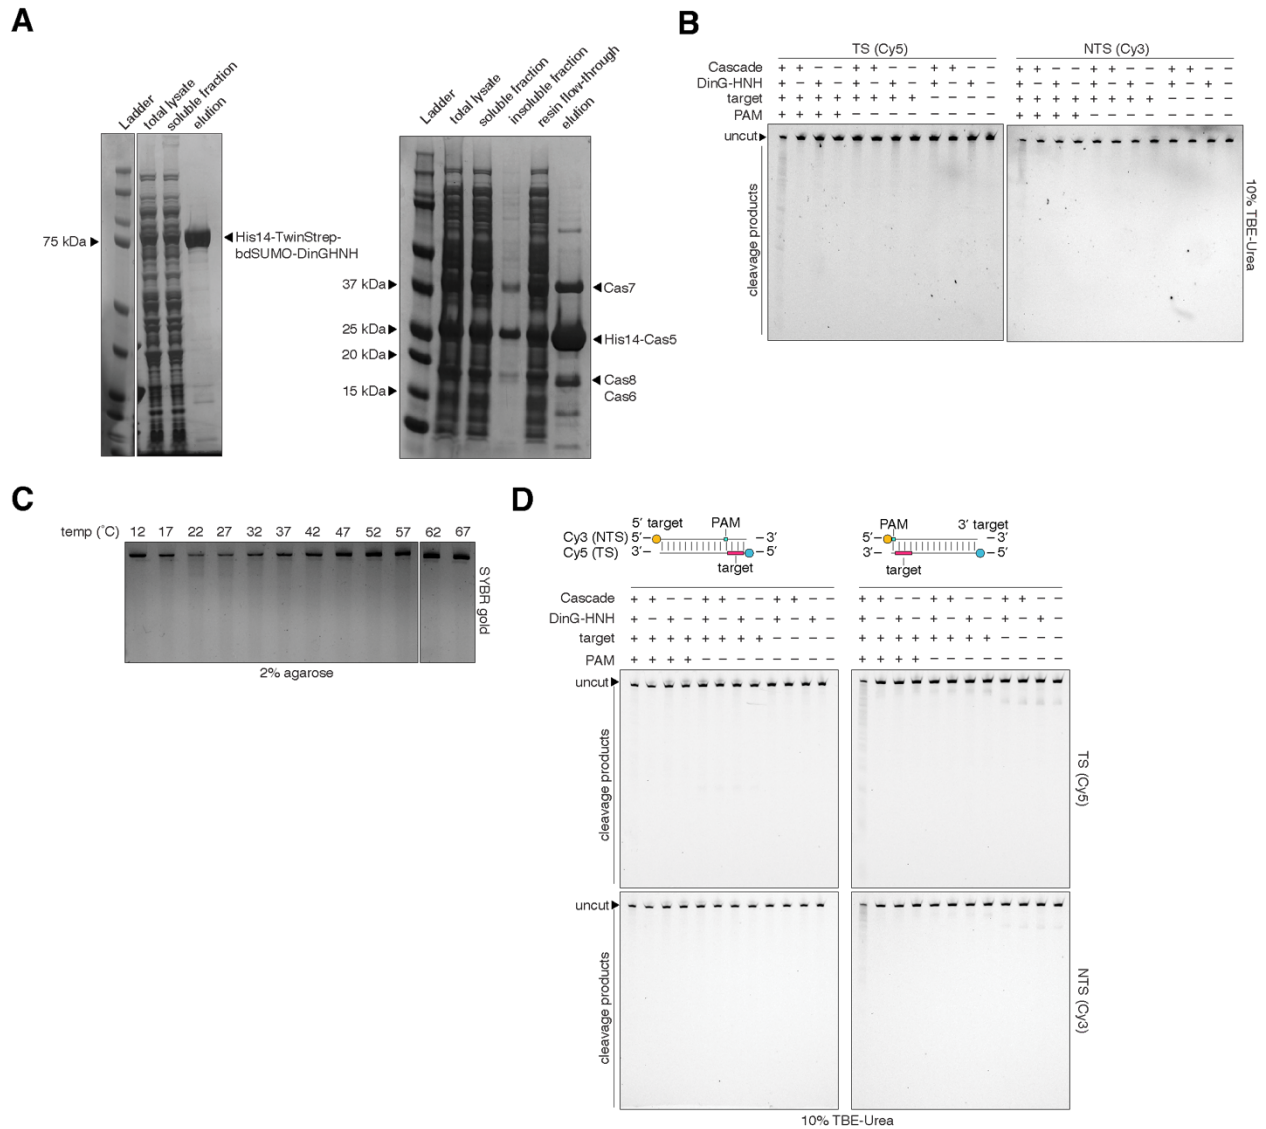

**Fig. S4. Biochemical characterization of DinG-HNH system**

(A) Affinity purification of DinG-HNH protein (left) and DinG-HNH-associated effector RNP complex (right). (B) Target dsDNA cleavage by DinG-HNH and associated effector RNP complex. Reactions were performed at 37°C, run on denaturing TBE-Urea gels and imaged in both the Cy5 and Cy3 channels as indicated. Cleavage of DNA, as indicated by laddering of products in both the Cy5 and Cy3 channels, was observed only when all protein components, the correct PAM and cognate protospacer target were present. (C) Target dsDNA cleavage by DinG-HNH and associated effector RNP complex at various temperatures. Products were analyzed on pre-SYBR Gold-stained 2% agarose gels. The greatest decrease in intensity of the uncleaved band was observed at ~22°C. (D) Target dsDNA cleavage by DinG-HNH and associated effector RNP complex with target sites placed on the 5' or 3' end of the target DNA species. Reactions

were performed at 22°C, run on denaturing TBE-Urea gels and imaged in both the Cy5 and Cy3 channels. The first four lanes of each gel display the same assay samples as shown in Fig. 3E.

**Fig. S5.**

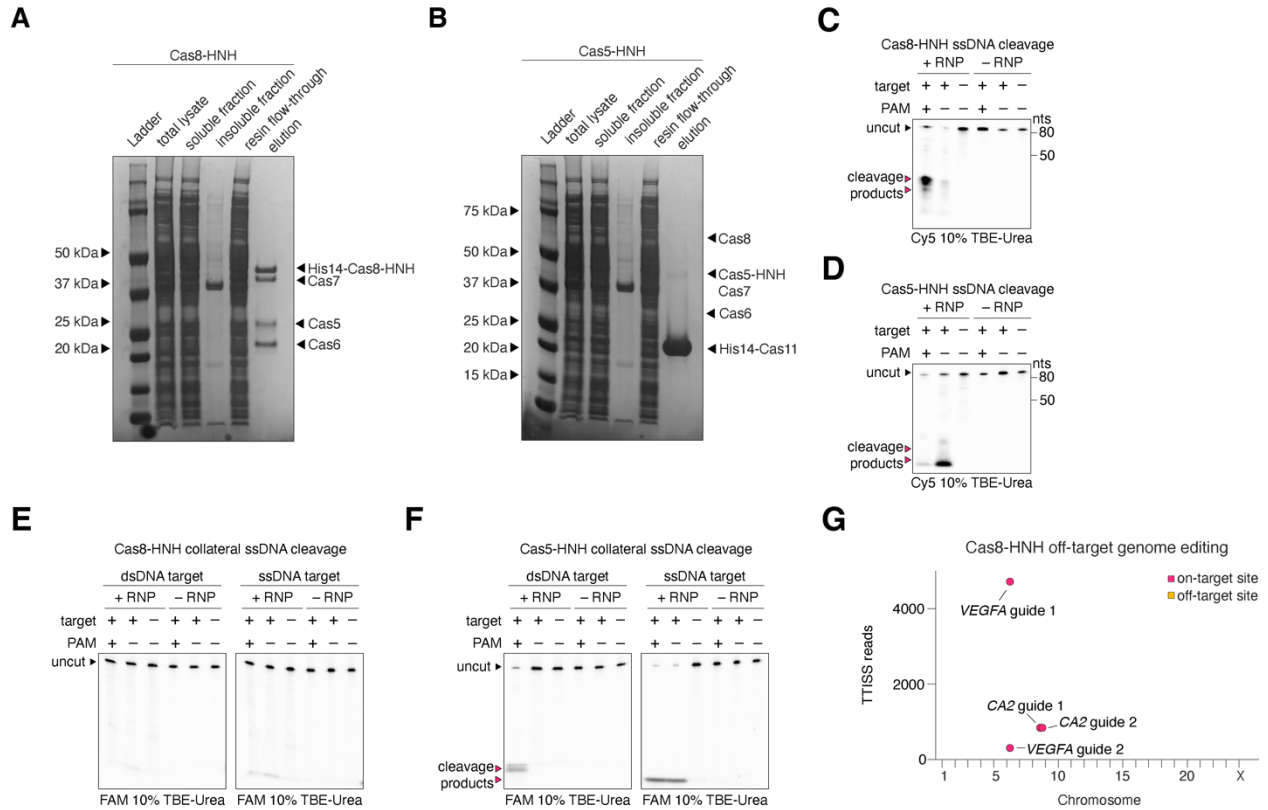

**Fig. S5. Additional characterization of Cas8-HNH and Cas5-HNH effector complexes**

SDS-PAGE gel electrophoresis of affinity purified **(A)** Cas8-HNH and **(B)** Cas5-HNH effector RNP complexes. **(C)** *In vitro* reconstituted Cas8-HNH Cascade RNP cleavage of linear ssDNA targets, in the presence or absence of a cognate target and/or PAM. + PAM: CCA; – PAM: AAG. **(D)** *In vitro* reconstituted Cas5-HNH Cascade RNP cleavage of linear ssDNA targets, in the presence or absence of a cognate target and/or PAM. + PAM: AAG; – PAM: CCA. **(E)** *In vitro* reconstituted Cas8-HNH Cascade RNP cleavage of collateral linear ssDNA substrates (FAM labeled), in the presence or absence of a dsDNA (left) or ssDNA (right) cognate target and/or PAM (unlabeled). + PAM: CCA; – PAM: AAG **(F)** *In vitro* reconstituted Cas5-HNH Cascade RNP cleavage of collateral linear ssDNA substrates (FAM labeled), in the presence or absence of a dsDNA (left) or ssDNA (right) cognate target and/or PAM (unlabeled). + PAM: AAG; – PAM: CCA. **(G)** TTISS off-target analysis of Cas8-HNH genome editing in HEK293FT cells for 4 guides.



Fig. S6. (cont'd)

H

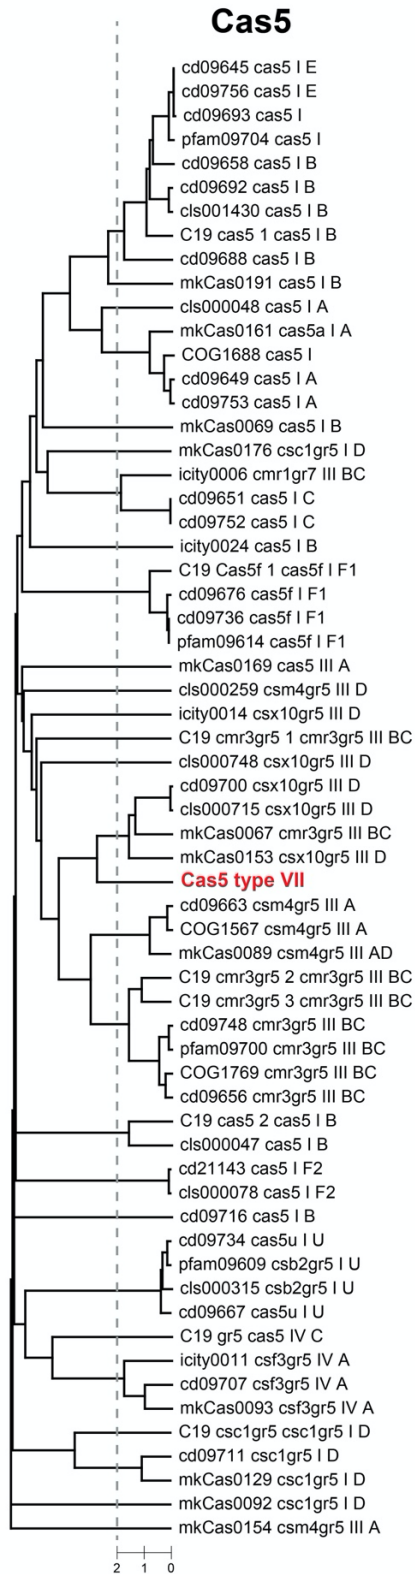

I

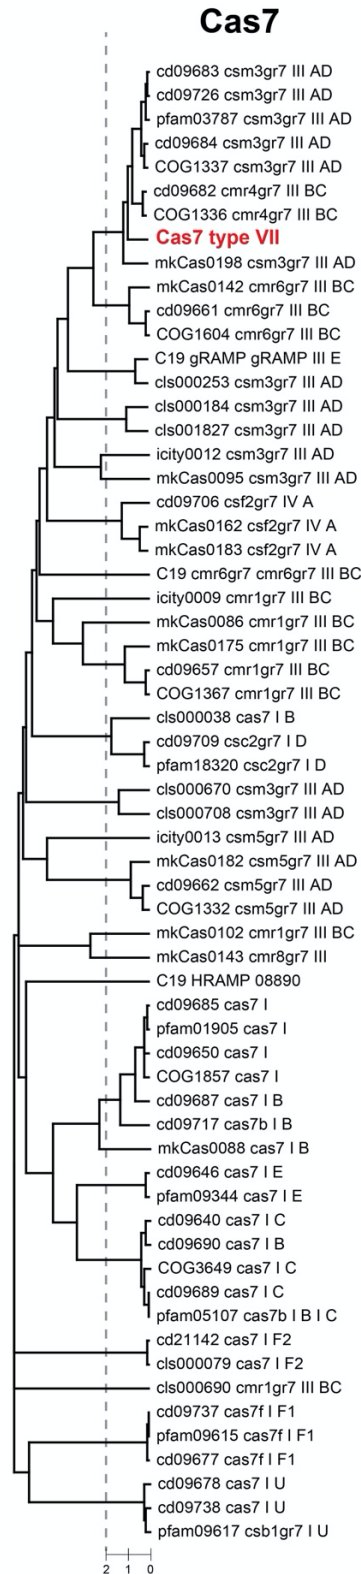

### **Fig. S6. Analysis of candidate type VII proteins**

**(A)** Locus diagram of a candidate type VII locus in candidate division WOR-3 bacterium isolate SpSt-780. **(B)** Top BLASTP (against NR and PDB) and HHpred results for each of the four components of the candidate type VII system. **(C)** UPGMA tree of representative Cas7 homologs across type III CRISPR and type VII systems. **(D)** Top HHpred result of Cas7 from candidate type VII systems. The catalytic aspartate (red triangles) is not conserved and is mutated to asparagine, suggesting that Cas7 is not capable of RNA cleavage as it is in many type III CRISPR systems. **(E)** Top HHpred result for Cas5, which is most similar to the type III-D Cas5 homolog Csx10. **(F)** FastTree phylogenetic analysis of representative  $\beta$ -CASP domain proteins from bacteria and archaea. Cas14 proteins form a single clade, shown in red. **(G)** Top HHpred result for Cas14. The N-terminal  $\beta$ -CASP domain of Cas14 is similar to the yeast cleavage and polyadenylation specificity factor 100. Catalytic residues that coordinate  $Zn^{2+}$  ions required for catalysis are marked by red triangles. **(H)** Broader HHSuite distance-based UPGMA tree of Cas5 proteins from all class 1 systems based on HMM profiles. **(I)** Broader HHSuite distance-based UPGMA tree of Cas7 proteins from all class 1 systems based on HMM profiles.



**Fig. S7.**

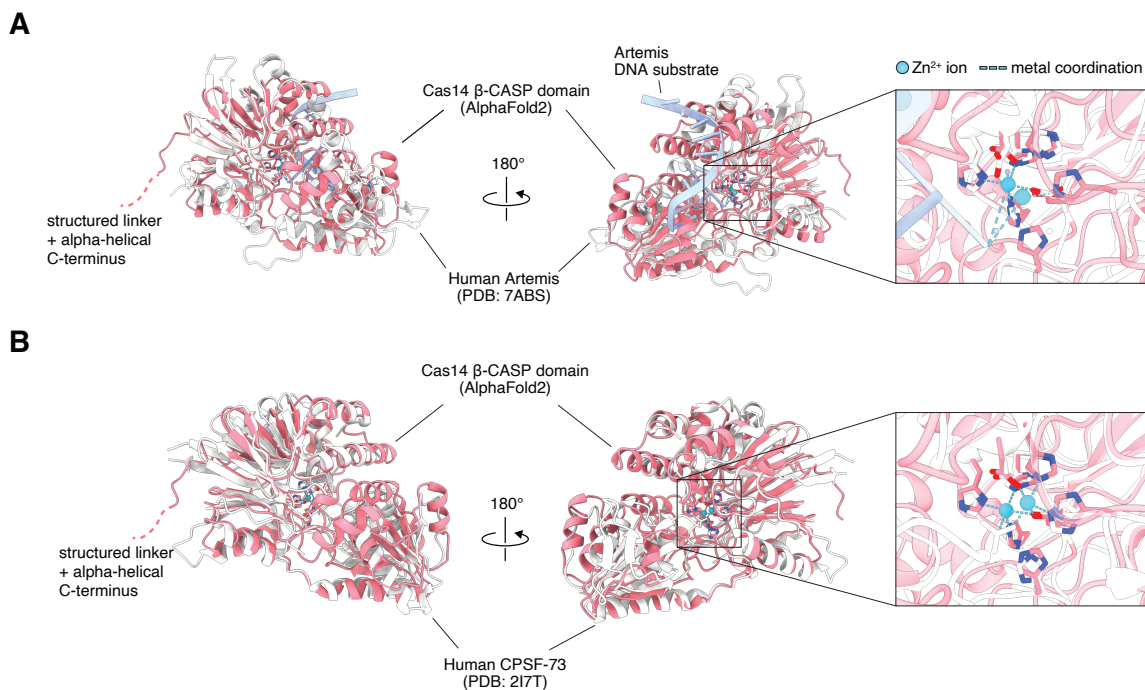

**Fig. S7. Structural comparison of Cas14  $\beta$ -CASP domain of and human  $\beta$ -CASP protein**

Superimposition of (A) AlphaFold2 prediction of Cas14, with only the  $\beta$ -CASP domain shown, and the X-ray crystal structure of the human Artemis protein in complex with a DNA substrate (PDB: 7ABS) and (B) AlphaFold2 prediction of Cas14, with only the  $\beta$ -CASP domain shown, and the X-ray crystal structure of the human CPSF-73 protein. Insets show the catalytic centers, which coordinate two  $Zn^{2+}$  ions (blue). Catalytic residues responsible for  $Zn^{2+}$  coordination are shown as sticks with colored heteroatoms.

**Fig. S8.**

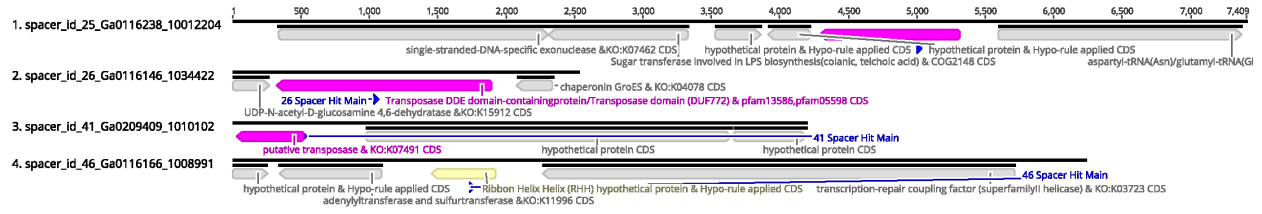

**Fig. S8. Spacer matches for candidate type VII system**

Four examples of spacers from CRISPR arrays associated with the candidate type VII system, with matching protospacers in predicted transposon genes.



**Fig. S10.**

**A**

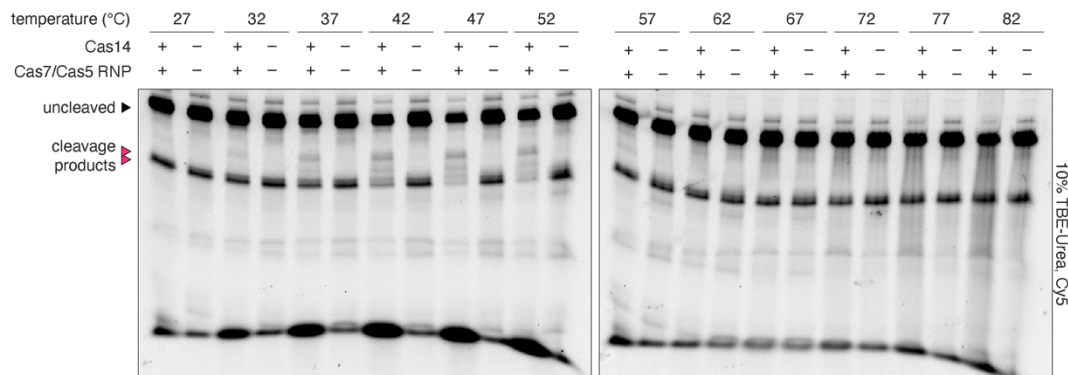

**B**

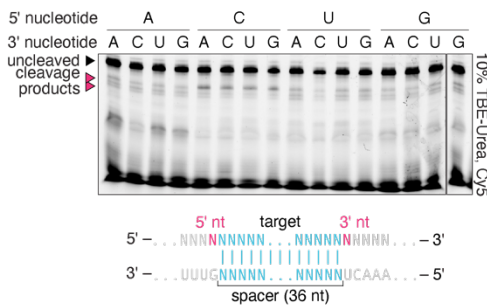

**C**

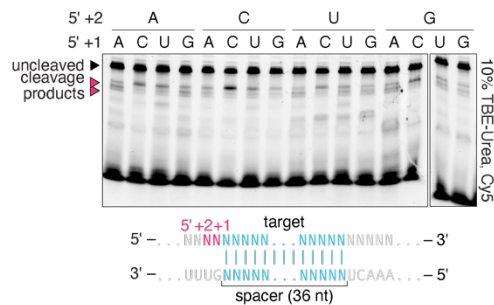

**D**

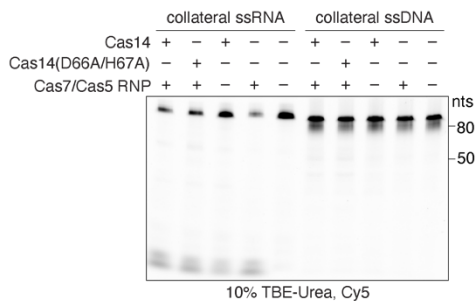

**Fig. S10. RNA cleavage by candidate type VII system.**

(A) Target RNA cleavage by Cas14 and associated Cas7/Cas5 RNP at various temperatures. Cleavage is apparent in a range from 37°C to 52°C. Targets contain a 3N degenerate sequence on either side of the protospacer. Reactions were conducted at 45°C for all subsequent experiments. (B) Cleavage of target RNAs with all combinations of 5' and 3' flanking sequences. Targets with a 5' C are preferred. (C) Cleavage of target RNAs with all 5' flanking dinucleotide combinations. Targets with a C directly 5' of the protospacer are preferred. (D) Candidate type VII system incubated with collateral ssRNA or ssDNA substrates in the presence of a matching target. Collateral substrates are labeled with Cy5, and matching targets are unlabeled. No collateral cleavage of either ssRNA or ssDNA was observed.

**Fig. S11.**

| Type Subtype                  | Type I                                    |                                                                                      |                  | Type III                                          |                                                                 | Type IV                                                                    | Type VII                                            |
|-------------------------------|-------------------------------------------|--------------------------------------------------------------------------------------|------------------|---------------------------------------------------|-----------------------------------------------------------------|----------------------------------------------------------------------------|-----------------------------------------------------|
|                               | Typical                                   | I-D                                                                                  | CAST (I-F)       | Typical                                           | Type III-E                                                      |                                                                            |                                                     |
| Effector Surveillance Complex | Cas7, Cas5, Cas8, [...Cas11]              | Cas7, Cas5, [...Cas11]                                                               | Cas7, Cas5, Cas8 | multiple Cas7s, multiple Cas11s, Cas5             | fusion of: multiple Cas7s + multiple Cas11s + Cas5              | Cas7, Cas5, Cas8-like, Cas11                                               | Cas7, Cas5                                          |
| Interference                  | Cas3                                      | Cas3 <sup>HD</sup> (HD) + Cas10d fusion, [Cas3]                                      |                  | Cas7, Cas10+HD                                    | Cas7                                                            | Cas10+HD, or DinG                                                          | Cas14 (b-CASP)                                      |
| Downstream cascade            |                                           |                                                                                      | Tn7 transposase  | Cas10 (coA sigalling)                             | Csx29 signal cascade                                            |                                                                            |                                                     |
| Target                        | DNA                                       | DNA                                                                                  | DNA              | RNA, ssDNA                                        | RNA                                                             | DNA                                                                        | RNA                                                 |
| Biological Mechanism          | Cas3 recruitment for cleavage via Cas3 HD | Recruitment of Cas3 <sup>HD</sup> /Cas10d fusion for cleavage via Cas3 <sup>HD</sup> |                  | Cas7 RNase, Cas10 recruitment for cleavage via HD | Cas7 RNase, Csx29 recruitment for proteolytic cleavage of Csx30 | DinG recruitment for DNA unwinding / Cas10 recruitment for cleavage via HD | putative: Cas14 recruitment for cleavage via b-CASP |

Cas10 C-terminus homologous to Cas11

Cas15 C-terminus homologous to Cas11/Cas10 C-terminus

Cas3 is composed of a helicase (Cas3<sup>3'</sup>) and an HD domain Cas3<sup>HD</sup>, which is homologous to the HD domain from Cas10

\*Cas6s are involved in CRISPR RNA processing and often interacts with effector complexes

| Type Subtype                  | Type II                                    | Type V                              |                                                       | Type VI                             |
|-------------------------------|--------------------------------------------|-------------------------------------|-------------------------------------------------------|-------------------------------------|
|                               |                                            | Typical                             | CAST (V-K)                                            |                                     |
| Effector Surveillance Complex | Cas9                                       | Cas12                               | Cas12                                                 | Cas13                               |
| Interference                  | Cas9                                       | Cas12                               |                                                       | Cas13                               |
| Downstream cascade            |                                            |                                     | Tn7 transposase                                       |                                     |
| Target                        | DNA                                        | DNA / RNA                           | DNA                                                   | RNA                                 |
| Biological Mechanism          | Cas9 binding for cleavage via RuvC and HNH | Cas12 binding for cleavage via RuvC | Cas12-mediated recruitment of Tn7 transposon via TniQ | Cas13 binding for cleavage via HEPN |

**Fig. S11. Comparison of CRISPR types along with candidate type VII CRISPR type**

Comparison of various essential system characteristics of different CRISPR types, namely proteins involved in the effector surveillance complex and the proteins involved in the target cleavage interference mechanism. Additionally shown are potential downstream cascade events that may take place for a given system, as well as the target nucleic acid type, and the biological mechanism for the system's activity.

**Fig. S12. Index of all systems identified in this study**

First row is the designation of the system. Second row is the set of defining domains of the system. Third row contains the enhanced CRISPR association score (if the system is contained in the passing sets). Some systems were included if they were identified through protein-protein associations, even if their enhanced CRISPR-association score did not meet the filtering threshold.

Note: Fig. S12 spans pages **55 to 58**

effector modules

**III-UAS**  
(new III subtype)  
6 / 7.0

**PhageCas9**  
(PhageCas9 + Helicase)  
N/A

**CasMu-I**  
(CasMu-I)  
20 / 46.0

**Cas12\_DUF3800\_TPR\_UvrD\_TPR**  
(DUF3800\_TPR + Cas12)  
11 / 12.0

**UAS-36**  
(Cas3\_PDDEXK)  
3 / 3.0

**Cas11-VRR**  
(Cse2\_VRR)  
7 / 7.2

**VII**  
(VII b-CASP)  
10 / 16.3

**Cas5-HNH**  
(Cas5\_HNH)  
161 / 243.7

**CasMu-V**  
(CasMuV MuB)  
2 / 4.0

**Cas12-Cas3**  
(Cas12 + Cas3)  
7 / 8.0

**Cas12-IscB**  
(Cas12 + IscB + HTH)  
4 / 9.5

**Cas8-HNH**  
(Cas8\_HNH)  
5 / 8.0

**DinG-HNH**  
(DinG\_HNH)  
111 / 129.0

**Cas8-Cas5**  
(Cas7 + Cas8\_Cas5 fusion)  
3 / 4.7

**UAS-37**  
(Cas9\_Cas1 fusion)  
3 / 3.0

**Cas5-Cas3**  
(Cas5\_Cas3 fusion)  
27 / 27.7

**UAS-38**  
(Cmr6\_Cmr1 fusion)  
24 / 37.1

**UAS-39**  
(Cas6\_Cas5\_fusion)  
4 / 4.0

**UAS-40**  
(Csa5\_Csa4 fusion)  
4 / 6.1

**UAS-41**  
(Cas8\_Cas5 fusion)  
4 / 4.0

**UAS-42**  
(DUF3761)  
22 / 22.7

**UAS-43**  
(RVT + group II intron PrimPol)  
14 / 15.7

**UAS-3**  
(DUF370)  
2 / 3.5

**UAS-7**  
(vWA + RDD)  
2 / 4.7

**UAS-2**  
(Tbf2 WYL)  
9 / 13.8

**UAS-44**  
(DUF2797 large zinc finger protein)  
8 / 9.2

**UAS-45**  
(RNaseH)  
11 / 21.5

**UAS-13**  
(DUF2797)  
6 / 7.9

**UAS-4**  
(DUF1882\_primase)  
15 / 16.5

**UAS-5**  
(DUF4384 + TPR)  
38 / 43.4

**UAS-46**  
(DUF3761)  
11 / 13.8

**UAS-10**  
(HlfK)  
11 / 23.1

**UAS-8**  
(23S rRNA IVP + DUF2325  
+ RT sometimes)

**UAS-11**  
(type II secretion GspH)  
8 / 8.5

**UAS-17**  
(Tbf2)  
13 / 32.9

**UAS-47**  
(WYL)  
35 / 37.0

**UAS-1**  
(Ras GTPase)  
8 / 14.3

**UAS-48**  
(Cas2 + 3'-5' proofreading exonuclease)  
16 / 17.0

**UAS-12**  
(FlhB)  
3 / 5.0

**UAS-9**  
(DUF4407 + other protein)  
23 / 39.3

**UAS-14**  
(SWIM)  
3 / 6.5

**UAS-6**  
(Acquisition-associated NACHT)  
25 / 40.6

**UAS-16**  
(DUF3761)  
9 / 12.0

**UAS-15**  
(TPR + DNA polA)  
10 / 14.3

**UAS-49**  
(large WYL)  
51 / 53.9

**UAS-50**  
(CARF\_RelA)  
8 / 11.5

**UAS-51**  
(SAVED\_TIR2)  
4 / 5.2

**UAS-52**  
(CARF\_Sigma)  
N/A

**UAS-53**  
(CARF\_DUF859 + many nearby genes)  
4 / 5.0

**UAS-54**  
(SIR2\_CHAT\_SAVED + SMODS)  
5 / 10.3

**UAS-55**  
(EAD7\_SAVED)  
2 / 5.6

**UAS-56**  
(CARF\_DUF859\_ATPase + many nearby genes)  
7 / 8.7

**UAS-57**  
(SAVED TIR)  
9 / 18.6

**UAS-58**  
(CARF\_ATPase\_HTH + RNAPol)  
N/A

**UAS-59**  
(CARF\_CYTH\_HD)  
3 / 5.1

**UAS-60**  
(CARF\_SIR2)  
N/A

**UAS-61**  
(CARF\_TIR\_Mrr)  
11 / 15.3

**UAS-62**  
(csx1 + Phage RNAPol)  
5 / 12.2

**UAS-63**  
(CARF\_2p\_deoxyribosyltransferase)  
5 / 7.7

**UAS-64**  
(CARF\_EAD7)  
N/A

**UAS-65**  
(CARF\_5p\_nucleotidase)  
6 / 6.6

**UAS-66**  
(SAVED\_APH\_TCAD9)  
4 / 4.5

**UAS-67**  
(Cutinase\_Lipase\_SAVED)  
4 / 4.7

CARF effectors

cas fusions

acquisition

**UAS-68**  
(SMODS + SAVED CHAT)  
N/A

**UAS-69**  
(methyltransferase)  
3 / 7.0

**UAS-70**  
(vATP-synt\_E)  
9 / 9.3

**UAS-71**  
(NERD)  
4 / 4.7

**UAS-72**  
(multi-gene system including greA greB)  
20 / 26.7

**UAS-73**  
(Mrr nuclease)  
7 / 10.5

**UAS-74**  
(PKinase)  
2 / 3.4

**UAS-75**  
(Sigma\_factor + Csx1 + large Csx1)  
7 / 7.5

**UAS-76**  
(HTH\_M78 peptidase)  
41 / 53.8

**UAS-77**  
(DUF2283)  
3 / 5.5

**UAS-78**  
(Nif11)  
7 / 7.7

**UAS-79**  
(XRE HTH regulator operonized with  
8 / 8.9 Cas effectors)

**UAS-80**  
(RepA replication)  
5 / 5.1

**UAS-81**  
(DUF4145)  
3 / 3.0

**UAS-82**  
(pentapeptide + unknown domain)  
4 / 7.6

**UAS-83**  
(Recep domain + 4 unknown genes)  
8 / 8.0

**UAS-84**  
(MazF)  
2 / 5.3

**UAS-31**  
(Kinase)  
10 / 16.4

**UAS-85**  
(betalactamase)  
2 / 5.5

**UAS-86**  
(large Sigma\_factor)  
3 / 4.0

**UAS-87**  
(vwa + PPC + kinase system)  
14 / 25.6

**UAS-24**  
(RNaseT)  
3 / 3.0

**UAS-88**  
(Sigma\_factor + Csx1)  
6 / 7.2

**UAS-19**  
(Cas9 or Cas12 associated WYL)  
19 / 35.1

**UAS-23**  
(unknown + DUF2791 + DUF2791\_ATPase)  
3 / 6.5

**UAS-89**  
(unknown accessory)  
8 / 13.6

**UAS-90**  
(nurA dsDNA break repair + DUF87)  
9 / 19.4

**UAS-91**  
(vWA + FHA + PP2C)  
3 / 6.8

**UAS-92**  
(DUF2281)  
13 / 17.6

**UAS-93**  
(PAP\_phosphatase\_CorA)  
63 / 127.1

**UAS-28**  
(Y1 TPase type III)  
6 / 7.3

**UAS-94**  
(DUF3800\_TPR)  
8 / 14.3

**UAS-95**  
(RAMA + DUF444 + PIN)  
25 / 34.3

**UAS-96**  
(unknown transmembrane protein)  
N/A

**UAS-97**  
(Fic Cascade)  
2 / 4.2

**UAS-98**  
(TPR\_MALT)  
5 / 6.3

**UAS-30**  
(UvrD\_NERD nuclease)  
6 / 6.0

**UAS-99**  
(Radical SAM protein)  
20 / 37.7

**UAS-100**  
(wWA + kinase)  
6 / 9.9

**UAS-101**  
(DUF2204)  
19 / 47.0

**UAS-102**  
(DUF5343 + Helicase\_HNH\_ResIII)  
3 / 3.0

**UAS-103**  
(TPR HATPase)  
2 / 3.0

**UAS-104**  
(ATPase + Metallophosphatase)  
3 / 3.0

**UAS-105**  
(M78 peptidase)  
5 / 5.6

**UAS-106**  
(DUF3800)  
3 / 3.0

**UAS-107**  
(Toprim)  
17 / 25.5

**UAS-108**  
(DUF433)  
7 / 16.3

**UAS-109**  
(DUF4407 + transpeptidase)  
2 / 5.3

**UAS-110**  
(mega peptidase)  
2 / 3.5

**UAS-111**  
(TIR cascade)  
2 / 4.4

**UAS-29**  
(Phage RNAPol)  
4 / 8.6

**UAS-112**  
(Csx20 operonized with Alpha Amylase)  
N/A

**UAS-113**  
(RNaseH)  
10 / 14.6

**UAS-114**  
(Tfb2\_Cas3Cterminus\_WYL)  
5 / 5.5

**UAS-115**  
(SLATT)  
N/A

**UAS-116**  
(Moca oxoreductase + SDR)  
21 / 38.1

**UAS-117**  
(DUF4231)  
3 / 4.8

**UAS-118**  
(DUF3891)  
12 / 23.7

**UAS-119**  
(DUF5679, zinc ribbon)  
6 / 9.9

**UAS-120**  
(DUF2225)  
2 / 4.1

**UAS-121**  
(RNAPol + Sigma\_factor + unknown gene)  
15 / 41.0

**UAS-122**  
(PRiA3 + zf)  
15 / 36.2

**UAS-22**  
(Cut8\_TPR)  
3 / 8.1



|                                                                |                                                                    |                                                    |                                                                         |
|----------------------------------------------------------------|--------------------------------------------------------------------|----------------------------------------------------|-------------------------------------------------------------------------|
| <b>UAS-21</b><br>(Cas13b + CorA)<br>3 / 3.7                    | <b>UAS-141</b><br>(PRiA4 ORF3)<br>2 / 3.9                          | toxin-antitoxin<br>↓                               | <b>UAS-34</b><br>(DarT DarG toxin-antitoxin ribosylation)<br>15 / 22.9  |
| <b>UAS-123</b><br>(NACHT)<br>2 / 3.2                           | <b>UAS-142</b><br>(TPR Protein Kinase)<br>3 / 7.2                  |                                                    | <b>UAS-35</b><br>(addiction gene orf associated with Cas9)<br>9 / 9.0   |
| <b>UAS-124</b><br>(unknown)<br>3 / 3.3                         | <b>UAS-143</b><br>(EamA _ F420H2_quin_red)<br>3 / 3.0              |                                                    | <b>UAS-158</b><br>(AbiE + DUF87)<br>8 / 18.7                            |
| <b>UAS-125</b><br>(UPF0158)<br>11 / 24.8                       | <b>UAS-144</b><br>(TPR)<br>24 / 48.9                               |                                                    | <b>UAS-159</b><br>(Nucleotidyltransferase HEPN, antitoxin)<br>18 / 48.1 |
| <b>UAS-126</b><br>(Cut8)<br>3 / 6.4                            | <b>UAS-145</b><br>(transmembrane NARF)<br>5 / 10.7                 |                                                    | <b>UAS-160</b><br>(DUF86 + Nucleotidyltransferase)<br>104 / 173.3       |
| <b>UAS-26</b><br>(DUF87 + NurA 5' to 3' nuclease)<br>4 / 4.0   | <b>UAS-25</b><br>(NACHT_PDDEXK + cascade)<br>8 / 12.8              |                                                    | <b>UAS-161</b><br>(Cas9 HicAB TA)<br>3 / 3.0                            |
| <b>UAS-127</b><br>(NACHT)<br>3 / 7.4                           | <b>UAS-146</b><br>(EAD11)<br>5 / 8.2                               |                                                    | <b>UAS-162</b><br>(Cas9 TA system)<br>25 / 36.4                         |
| <b>UAS-128</b><br>(Mrr nuclease)<br>N/A                        | <b>UAS-147</b><br>(WYL I-D)<br>36 / 66.5                           |                                                    | <b>UAS-163</b><br>(nucleotidyltransferase + HTH)<br>4 / 6.9             |
| <b>UAS-129</b><br>(Tubulin + other protein + vWa)<br>16 / 43.6 | <b>UAS-27</b><br>(methyltransferase + cascade)<br>2 / 3.2          |                                                    | <b>UAS-164</b><br>(AbiEii)<br>2 / 5.2                                   |
| <b>UAS-130</b><br>(Tubulin system)<br>5 / 13.1                 | <b>UAS-148</b><br>(mega Cas8-like)<br>37 / 51.3                    |                                                    | <b>UAS-165</b><br>(TA DUF3368 _ UPF0175)<br>11 / 16.6                   |
| <b>UAS-131</b><br>(TIR2)<br>8 / 18.9                           | <b>UAS-149</b><br>(vWA + Tubulin)<br>N/A                           |                                                    | <b>UAS-166</b><br>(AbiEi + AbiEii)<br>N/A                               |
| <b>UAS-132</b><br>(Cas9 associated Y1)<br>20 / 27.4            | <b>UAS-150</b><br>(APH_EckKinase)<br>3 / 3.0                       |                                                    | <b>UAS-167</b><br>(TA system)<br>7 / 7.3                                |
| <b>UAS-133</b><br>(TPR Rho RNA binding)<br>5 / 6.4             | <b>UAS-151</b><br>(Cas8_Fic fusion)<br>2 / 5.0                     |                                                    | <b>UAS-168</b><br>(PHD + PIN TA)<br>3 / 3.9                             |
| <b>UAS-18</b><br>(toprim)<br>4 / 6.6                           | <b>UAS-152</b><br>(RNaseT)<br>4 / 7.4                              |                                                    | <b>UAS-169</b><br>(DUF370 + RNaseH TA)<br>3 / 5.2                       |
| <b>UAS-134</b><br>(WYL operonized with cascade)<br>15 / 29.8   | <b>UAS-153</b><br>(SNF2 instead of Cas3)<br>7 / 9.9                | <b>UAS-170</b><br>(DUF2442 + DUF4160)<br>3 / 3.0   |                                                                         |
| <b>UAS-135</b><br>(ATPase_DUF4435 + Cas12)<br>3 / 3.0          | <b>UAS-154</b><br>(HIRAN Cas9, one case ATPase)<br>28 / 44.9       | <b>UAS-171</b><br>(small ORFs)<br>43 / 48.3        |                                                                         |
| <b>UAS-136</b><br>(DUF6155)<br>4 / 6.7                         | <b>UAS-20</b><br>(Cas12 + bzip)<br>7 / 7.4                         | <b>UAS-172</b><br>(RHH TA system)<br>23 / 35.0     |                                                                         |
| <b>UAS-137</b><br>(Holliday Junction Resolvase)<br>6 / 6.7     | <b>UAS-155</b><br>(transmembrane_vWA + DUF4407)<br>3 / 4.4         | <b>UAS-173</b><br>(DUF3368 TA system)<br>42 / 56.2 |                                                                         |
| <b>UAS-138</b><br>(TIR)<br>5 / 11.2                            | <b>UAS-156</b><br>(Mrr nuclease + ATPase)<br>N/A                   | massive<br>↓                                       | <b>M2</b><br>(massive defense genes)<br>3 / 3.0                         |
| <b>UAS-139</b><br>(metal system)<br>3 / 4.3                    | <b>UAS-33</b><br>(Prok_E2 + ThiF + ThiS + NYN + CorA)<br>34 / 50.0 |                                                    | <b>M1</b><br>(massive defense system)<br>6 / 13.3                       |
| <b>UAS-140</b><br>(DUF5919)<br>2 / 3.0                         | <b>UAS-157</b><br>(RecJ_HD)<br>19 / 25.4                           | tRNA<br>arrays<br>↓                                | (GGDEF tRNA array)<br>174 / 347.6                                       |

(tRNA array DEDDh)  
483 / 551.2

(tRNA array ribonuclease)  
104 / 112.6

hypervariable  
interspersed arrays  
↓

(DUF3800 standalone)  
12 / 12.0

(PDDEXK + Metallophosphatase)  
44 / 47.4

(PDDEXK\_ATPase)  
37 / 39.4

(PLMP\_corA-like)  
37 / 48.3

(DUF222\_HNH)  
51 / 111.4

(GGDEF + MFS + Phospholipase)  
25 / 35.5

### Fig. S13. Representative loci of all systems identified in this study

One representative locus was selected for each system and displayed along with the genes that are considered to be associated (red colored genes). The cluster id below the characteristic domains associated with the system (top middle bold for each system) is shown with regular font and corresponds to the gene with the asterisk. The designated name for the system is shown on the upper left. Gene names for newly identified genes, as applicable, are shown below the genes in bold. All gene names follow the format *uas#A*, *uas#B*,... corresponding to the genes that make up the system UAS-#. When space is limited, the *uas#* portion is omitted visually, but the underlying gene name is still *uas-#A*, etc. For example, a gene displayed with **C** underneath it, but belonging to UAS-293 would have a gene name of *uas293C*. Signature effector genes are colored in darker blue. Other cas genes are shown as light blue. Cas6 is shown as light green. Unrelated or other genes are shown as light grey. White genes with shorter height are genes that overlap with CRISPR arrays (vertical black lines). Above each gene are redundancy reduced predictions of the protein domains via HMMER on the PFAM database. Enhanced CRISPR association scores for the cluster ids are shown as applicable: some systems were included if they were identified through protein-protein associations, or exceptionally low association score (in the case of PhageCas9), even if their enhanced CRISPR-association score did not meet the filtering threshold, in which case the CRISPR association-scores are not shown.

Note: Fig. S13 spans pages **60 to 85**

#### Sub table of contents

|                                              |    |
|----------------------------------------------|----|
| Effector Modules                             | 60 |
| Cas Fusions                                  | 62 |
| Acquisition                                  | 63 |
| CARF                                         | 66 |
| Auxiliary                                    | 69 |
| Toxin-Antitoxin                              | 81 |
| Massive Genes                                | 83 |
| Non-CRISPR tRNA arrays                       | 84 |
| Non-CRISPR arrays with hypervariable spacers | 85 |

**III-UAS**Effector-Modules  
6 / 7.0**(new III subtype)**

EMBL\_ERZ584659&amp;&amp;contig\_33476&amp;&amp;1228\_2278\_-1

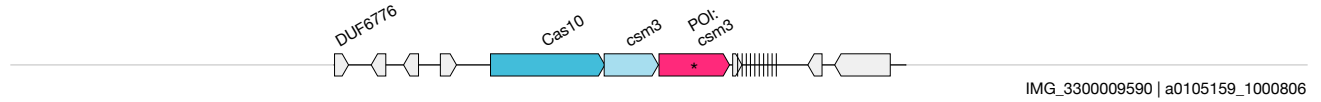

IMG\_3300009590 | a0105159\_1000806

**PhageCas9**Effector-Modules  
N/A**(PhageCas9 + Helicase)**

EMBL\_ERZ795075&amp;&amp;contig\_381&amp;&amp;19666\_22555\_1

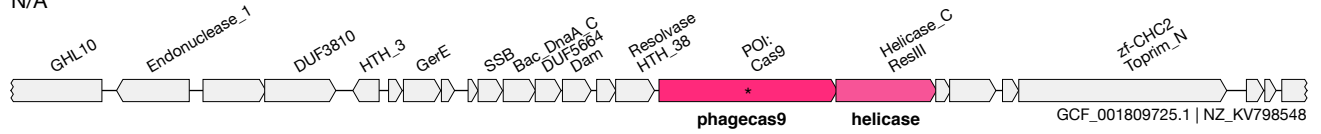

GCF\_001809725.1 | NZ\_KV798548

**CasMu-I**Effector-Modules  
20 / 46.0**(CasMu-I)**

GCA\_004138175.2&amp;&amp;RYFE02000070&amp;&amp;3219\_4437\_1

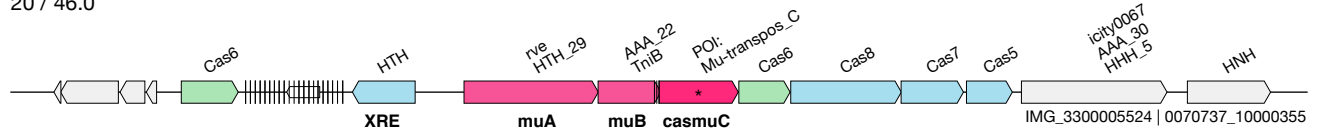

IMG\_3300005524 | 0070737\_10000355

**Cas12\_DUF3800\_TPR\_UvrD\_TPR**Effector-Modules  
11 / 12.0**(DUF3800\_TPR + Cas12)**

GCA\_018268035.1&amp;&amp;JAFDXI010000155&amp;&amp;1871\_5534\_-1

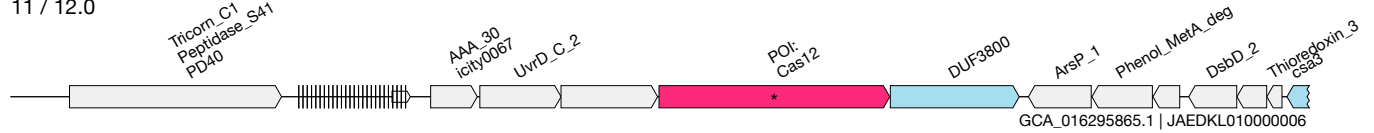

GCA\_016295865.1 | JAEDKL010000006

**UAS-36**Effector-Modules  
3 / 3.0**(Cas3\_PDDEXK)**

GCA\_018369695.1&amp;&amp;JAGZBW010000011&amp;&amp;6634\_10387\_-1

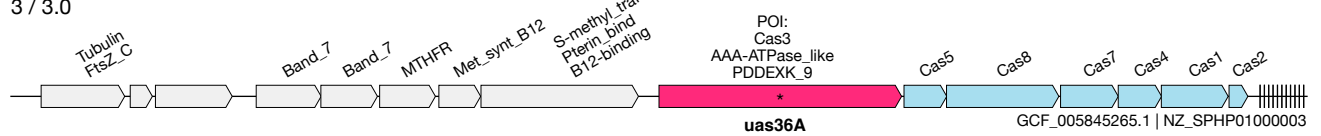

GCF\_005845265.1 | NZ\_SPHP010000003

**Cas11-VRR**Effector-Modules  
7 / 7.2**(Cse2\_VRR)**

IMG\_3300006527&amp;&amp;Ga0100159\_100137&amp;&amp;71478\_72558\_1

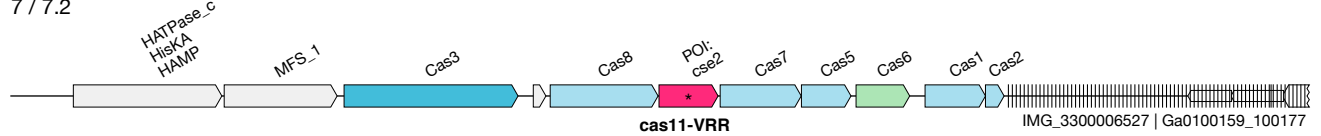

IMG\_3300006527 | Ga0100159\_100177

**VII**Effector-Modules  
10 / 16.3**(VII b-CASP)**

IMG\_3300009712&amp;&amp;a0116165\_1003158&amp;&amp;2597\_4427\_-1

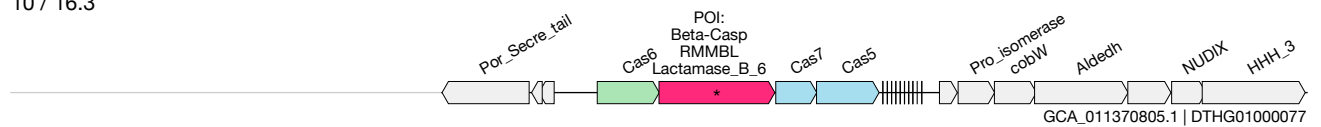

GCA\_011370805.1 | DTHG010000077

**Cas5-HNH**Effector-Modules  
161 / 243.7**(Cas5\_HNH)**

IMG\_3300010327&amp;&amp;0116246\_10008300&amp;&amp;2259\_3435\_-1

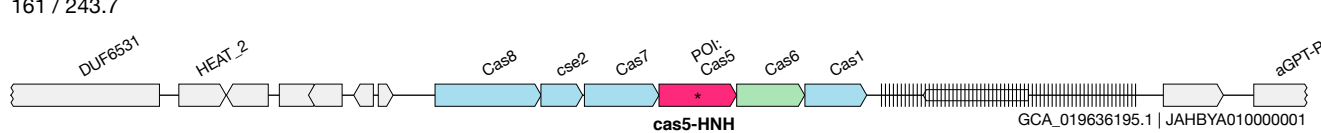

GCA\_019636195.1 | JAHHYA010000001

**CasMu-V**Effector-Modules  
2 / 4.0**(CasMuV MuB)**

IMG\_3300010349&amp;&amp;0116240\_10096391&amp;&amp;801\_1509\_-1

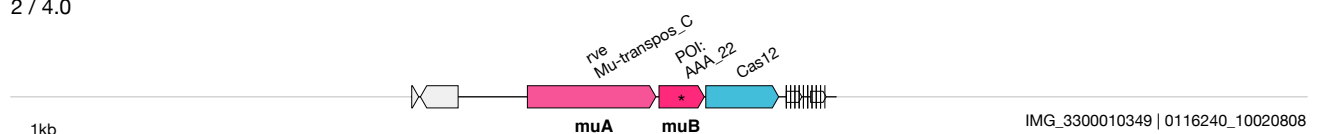

IMG\_3300010349 | 0116240\_10020808

1kb

**Cas12-Cas3**  
Effector-Modules  
7 / 8.0

**(Cas12 + Cas3)**  
IMG\_3300020641&&Ga0206884\_1077&&6347\_8576\_1

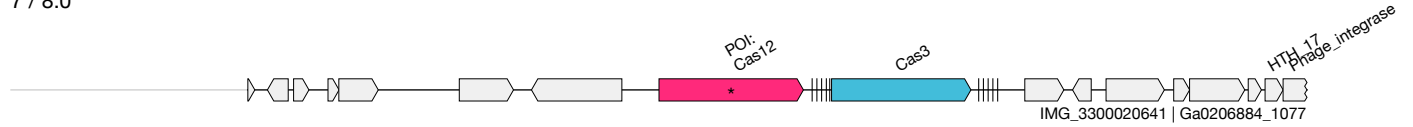

**Cas12-IscB**  
Effector-Modules  
4 / 9.5

**(Cas12 + IscB + HTH)**  
IMG\_3300027823&&0209490\_10014851&&1048\_2638\_1

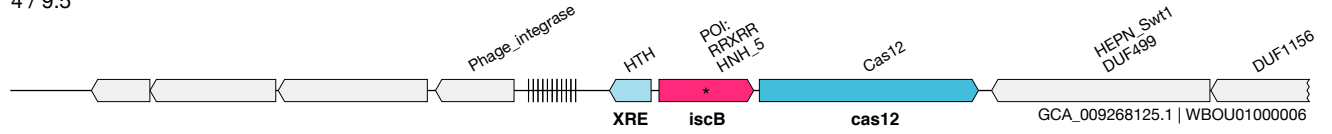

**Cas8-HNH**  
Effector-Modules  
5 / 8.0

**(Cas8\_HNH)**  
IMG\_3300031760&&0326513\_10063483&&752\_1769\_-1

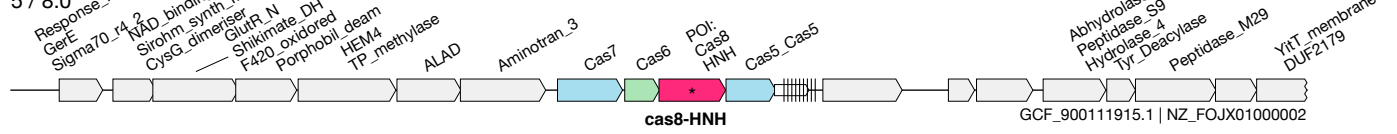

**DinG-HNH**  
Effector-Modules  
111 / 129.0

**(DinG\_HNH)**  
IMG\_3300044617&&a0453743\_0023453&&2386\_4123\_-1

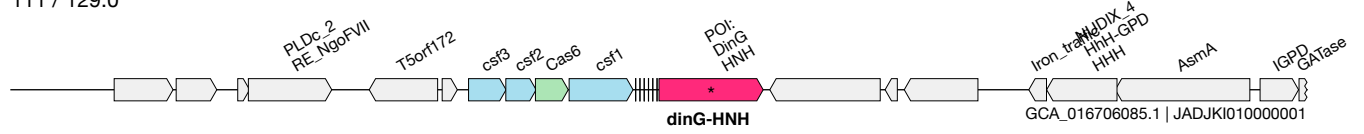

1kb

**Cas8-Cas5**Cas-Fusions  
3 / 4.7**(Cas7 + Cas8\_Cas5 fusion)**

EMBL\_ERZ505329&amp;&amp;contig\_129&amp;&amp;28461\_30633\_-1

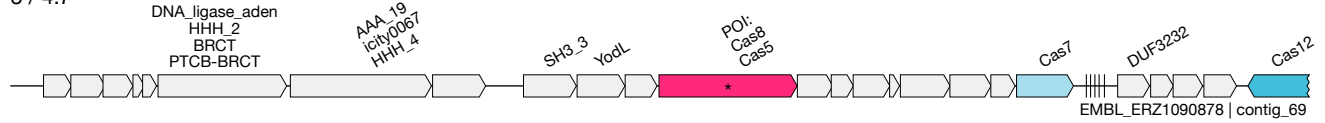**UAS-37**Cas-Fusions  
3 / 3.0**(Cas9\_Cas1 fusion)**

GCA\_904380115.1&amp;&amp;CAJFHU010000034&amp;&amp;10263\_14391\_-1

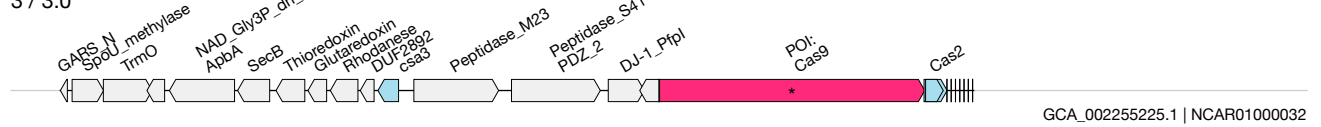**Cas5-Cas3**Cas-Fusions  
27 / 27.7**(Cas5\_Cas3 fusion)**

GCF\_000058485.1&amp;&amp;NC\_008278&amp;&amp;6031418\_6034760\_1

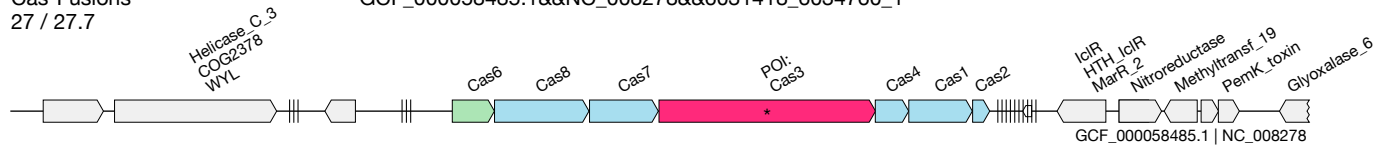**UAS-38**Cas-Fusions  
24 / 37.1**(Cmr6\_Cmr1 fusion)**

GCF\_021018745.1&amp;&amp;NZ\_CP063845&amp;&amp;4894452\_4896432\_-1

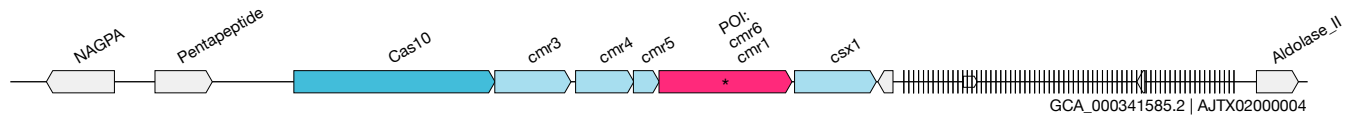**UAS-39**Cas-Fusions  
4 / 4.0**(Cas6\_Cas5 fusion)**

IMG\_3300001592&amp;&amp;Draft\_10000135&amp;&amp;23396\_24782\_1

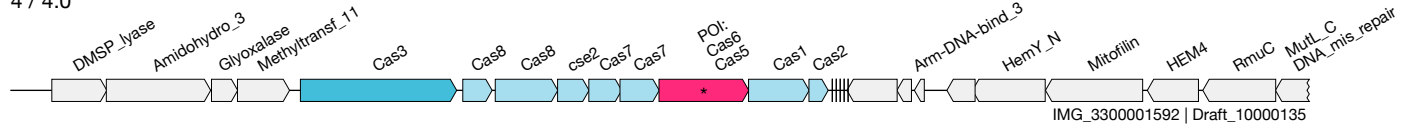**UAS-40**Cas-Fusions  
4 / 6.1**(Csa5\_Csa4 fusion)**

IMG\_3300021472&amp;&amp;a0190363\_1001919&amp;&amp;8327\_9779\_1

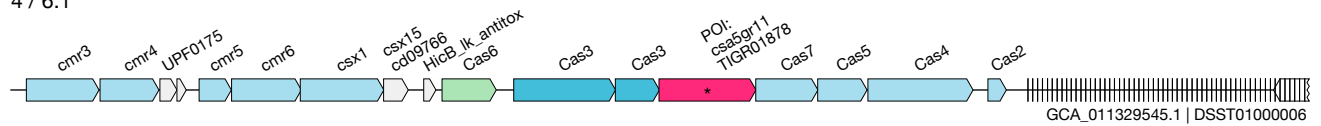**UAS-41**Cas-Fusions  
4 / 4.0**(Cas8\_Cas5 fusion)**

WGS\_JABLTL01&amp;&amp;JABLTL010073043&amp;&amp;184\_2911\_1

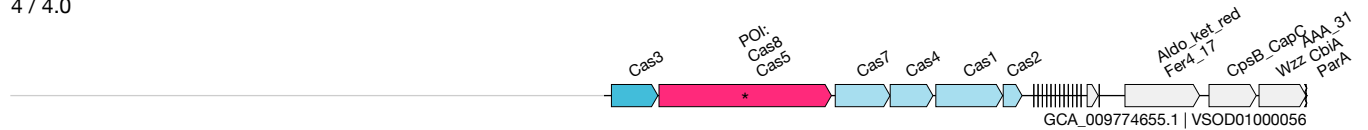

1kb

**UAS-42**Acquisition  
22 / 22.7**(DUF3761)**

EMBL\_ERZ724514&amp;&amp;contig\_3192&amp;&amp;343\_1033\_-1

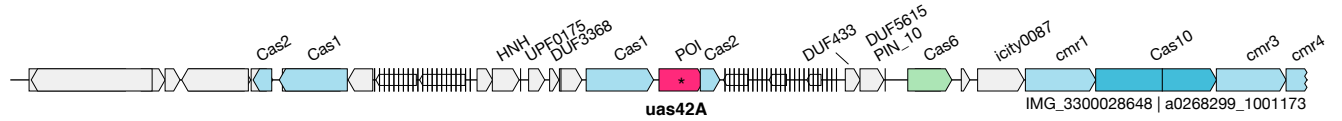**UAS-43**Acquisition  
14 / 15.7**(RVT + group II intron PrimPol)**

GCA\_002358875.1&amp;&amp;DEPS01000038&amp;&amp;15824\_19211\_-1

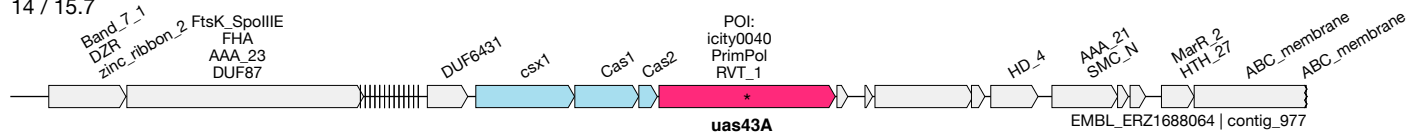**UAS-3**Acquisition  
2 / 3.5**(DUF370)**

GCA\_013359445.1&amp;&amp;JABWBV010000281&amp;&amp;2844\_3129\_-1

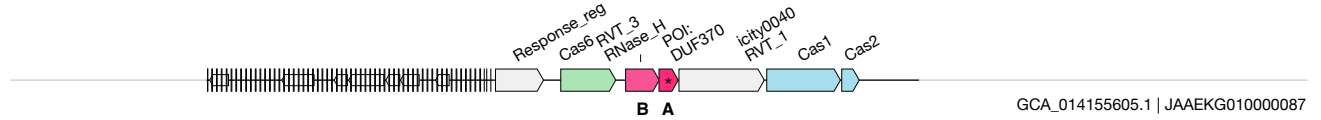**UAS-7**Acquisition  
2 / 4.7**(vWA + RDD)**

GCA\_016179065.1&amp;&amp;JACOSD010000405&amp;&amp;5712\_7455\_-1

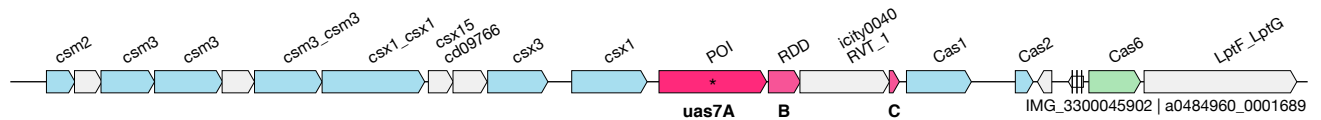**UAS-2**Acquisition  
9 / 13.8**(Tbf2 WYL)**

GCA\_016223105.1&amp;&amp;JACRPR010000238&amp;&amp;1\_1870\_1

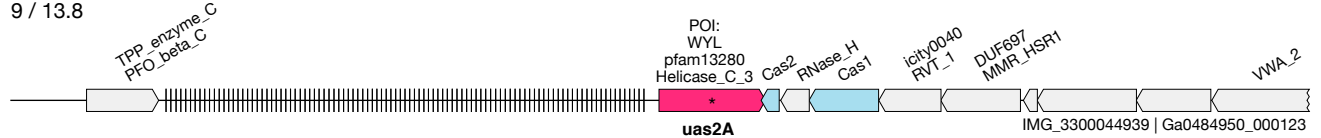**UAS-44**Acquisition  
8 / 9.2**(DUF2797 large zinc finger protein)**

GCA\_016840085.1&amp;&amp;JAEOTA010000034&amp;&amp;18467\_19766\_-1

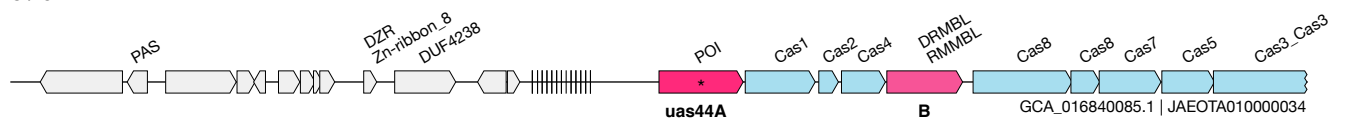**UAS-45**Acquisition  
11 / 21.5**(RNaseH)**

GCA\_016876015.1&amp;&amp;VGOD01000184&amp;&amp;7922\_8489\_1

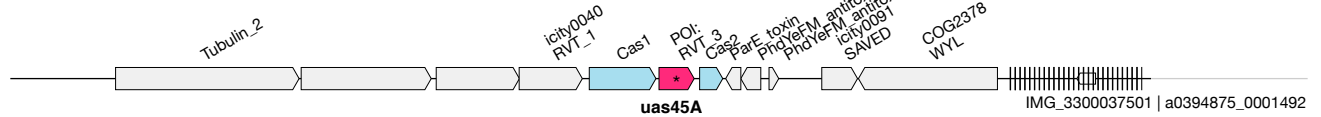**UAS-13**Acquisition  
6 / 7.9**(DUF2797)**

GCA\_018238085.1&amp;&amp;JABCUA010000354&amp;&amp;227\_1190\_-1

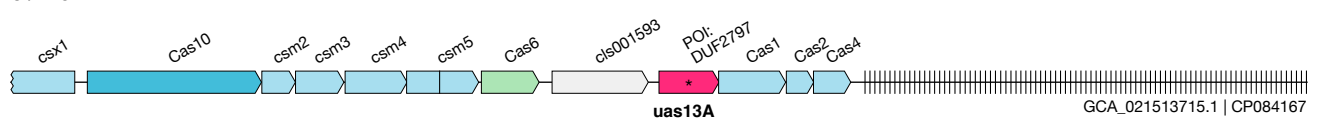**UAS-4**Acquisition  
15 / 16.5**(DUF1882 primase)**

GCA\_018712075.1&amp;&amp;DVHN01000112&amp;&amp;0\_1944\_1

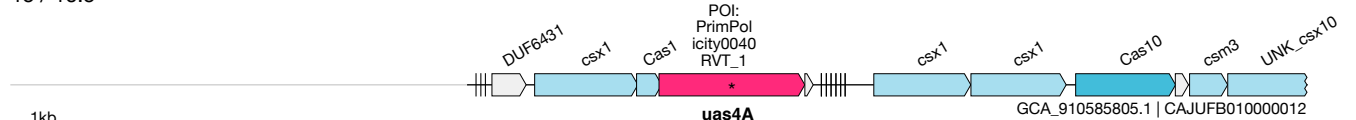

1kb

**UAS-5**Acquisition  
38 / 43.4**(DUF4384 + TPR)**

GCA\_019359625.1&amp;&amp;JAHHGW010000067&amp;&amp;164750\_165512\_-1

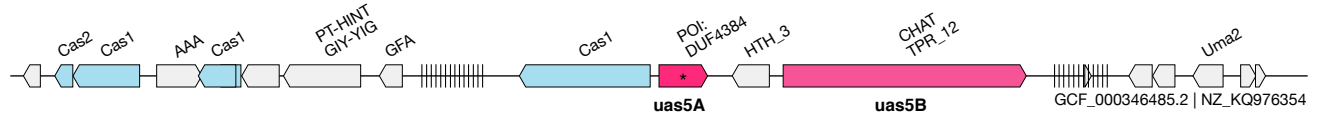**UAS-46**Acquisition  
11 / 13.8**(DUF3761)**

GCA\_020629965.1&amp;&amp;JAHDCG010000247&amp;&amp;2680\_3286\_1

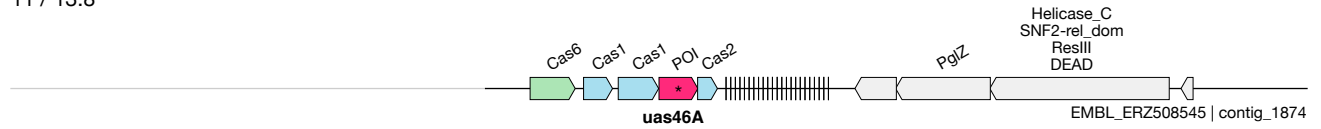**UAS-10**Acquisition  
11 / 23.1**(HlfK)**

GCA\_903844205.1&amp;&amp;CAIMSW010000586&amp;&amp;959\_2393\_-1

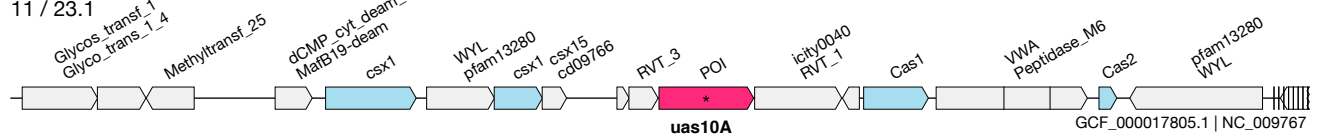**UAS-8**Acquisition  
18 / 22.0**(23S rRNA IVP + DUF2325 + RT sometimes)**

GCF\_002075285.3&amp;&amp;NZ\_CP021983&amp;&amp;497963\_498752\_-1

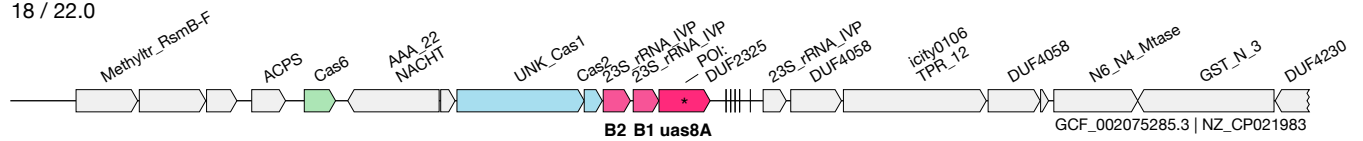**UAS-11**Acquisition  
8 / 8.5**(type II secretion GspH)**

GCF\_014695895.1&amp;&amp;NZ\_JACJPD010000040&amp;&amp;5457\_6090\_-1

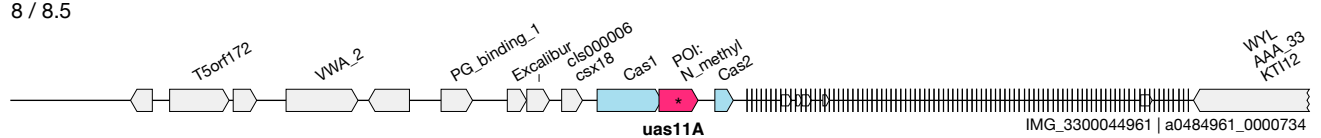**UAS-17**Acquisition  
13 / 32.9**(Tbf2)**

IMG\_3300009499&amp;&amp;0114930\_10001113&amp;&amp;3299\_5312\_-1

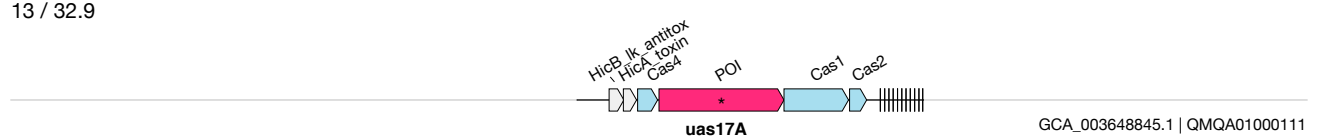**UAS-47**Acquisition  
35 / 37.0**(WYL)**

IMG\_3300012091&amp;&amp;a0136625\_1012864&amp;&amp;2\_971\_1

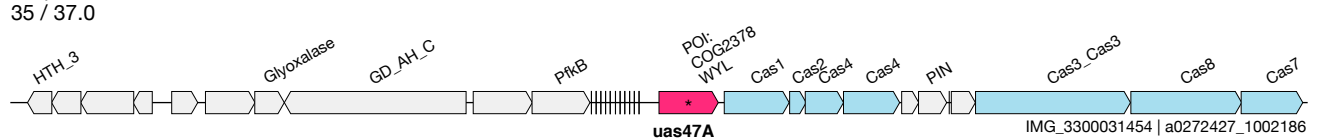**UAS-1**Acquisition  
8 / 14.3**(Ras GTPase)**

IMG\_3300015360&amp;&amp;0163144\_10061397&amp;&amp;188\_1256\_1

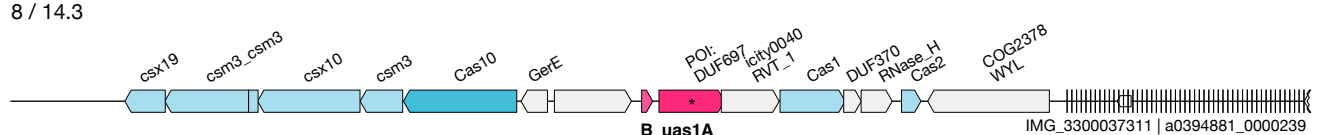**UAS-48**Acquisition  
16 / 17.0**(Cas2 + 3'-5' proofreading exonuclease)**

IMG\_3300019992&amp;&amp;Ga0197015\_1040&amp;&amp;6129\_7227\_-1

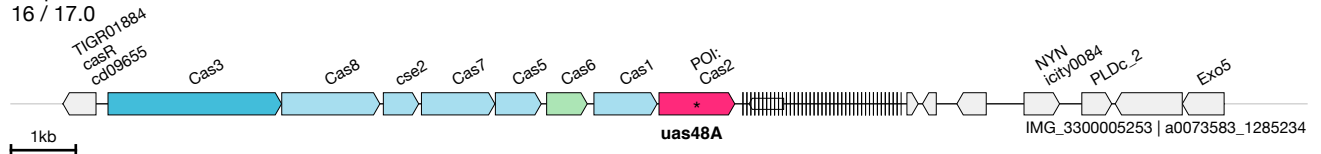



**UAS-12**Acquisition  
3 / 5.0**(FihB)**

IMG\_3300026484&amp;&amp;a0256837\_1016836&amp;&amp;561\_990\_-1

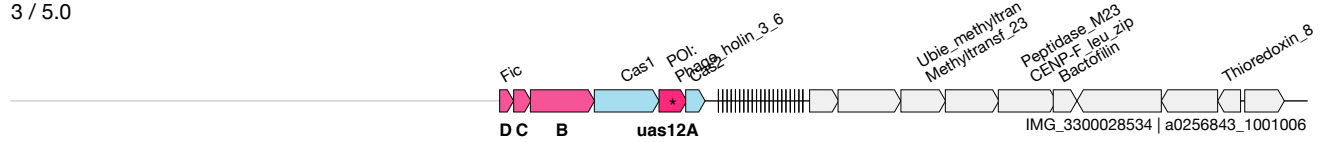**UAS-9**Acquisition  
23 / 39.3**(DUF4407 + other protein)**

IMG\_3300026531&amp;&amp;a0256835\_1021849&amp;&amp;344\_1451\_1

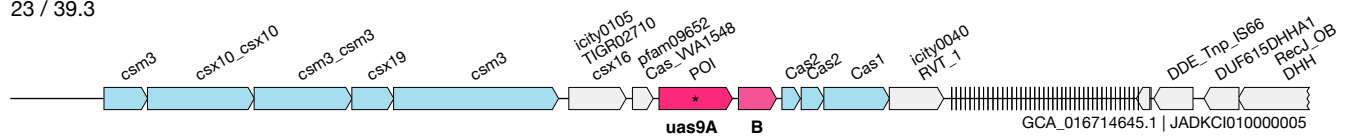**UAS-14**Acquisition  
3 / 6.5**(SWIM)**

IMG\_3300027532&amp;&amp;a0209544\_1004784&amp;&amp;1334\_3008\_1

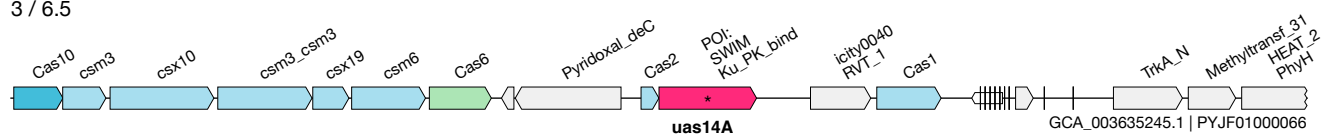**UAS-6**Acquisition  
25 / 40.6**(Acquisition-associated NACHT)**

IMG\_3300035668&amp;&amp;a0372944\_0001891&amp;&amp;1173\_5076\_-1

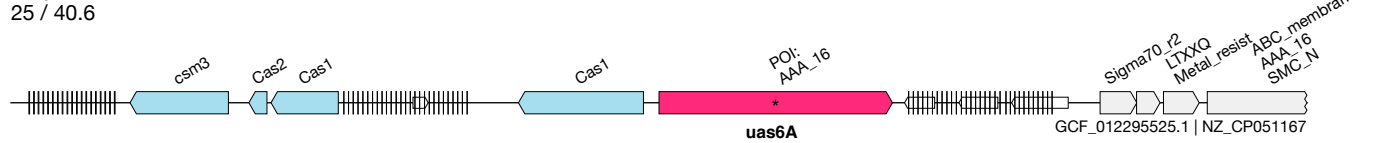**UAS-16**Acquisition  
9 / 12.0**(DUF3761)**

IMG\_3300037311&amp;&amp;a0394881\_0014120&amp;&amp;7964\_8594\_-1

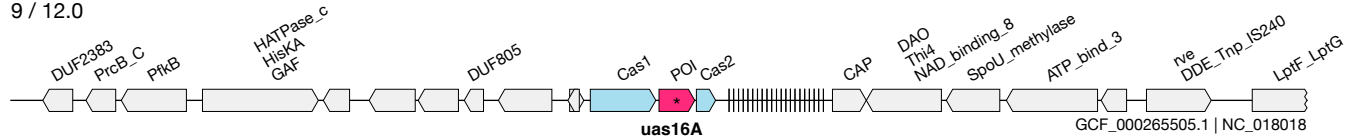**UAS-15**Acquisition  
10 / 14.3**(TPR + DNA polA)**

WGS\_JACDJC01&amp;&amp;JACDJC010011245&amp;&amp;1712\_3152\_-1

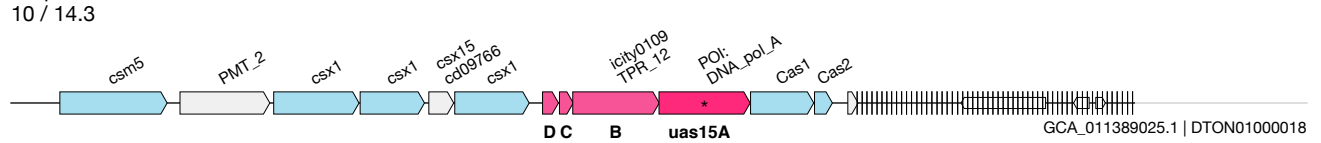**UAS-49**Acquisition  
51 / 53.9**(large WYL)**

WGS\_RRYU01&amp;&amp;RRYU01005723&amp;&amp;198\_2535\_1

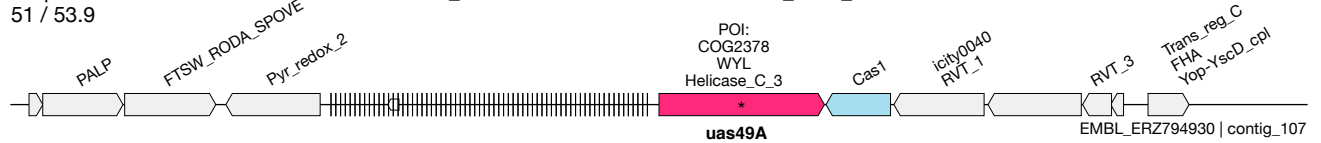

1kb

**UAS-50**  
CARF  
8 / 11.5

(**CARF\_ReIA**)  
EMBL\_ERZ404942&&contig\_42542&&228\_1605\_-1

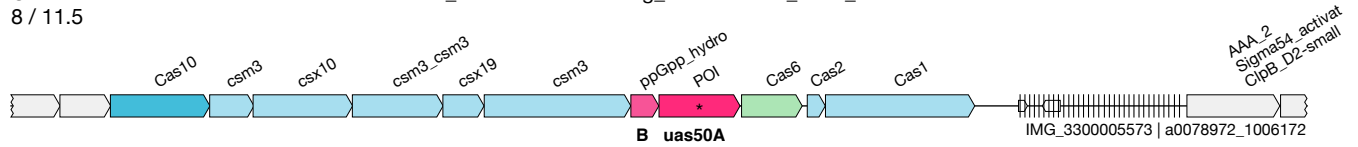

**UAS-51**  
CARF  
4 / 5.2

(**SAVED\_TIR2**)  
EMBL\_ERZ773005&&contig\_5&&212166\_213489\_1

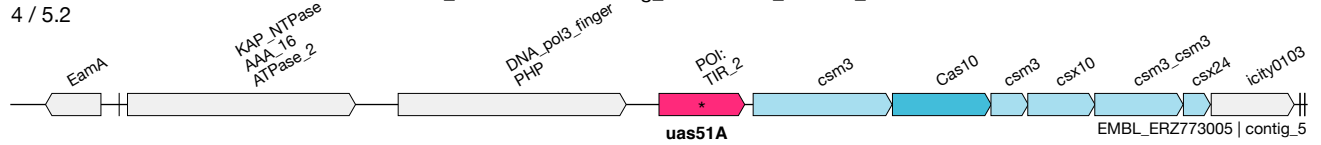

**UAS-52**  
CARF  
N/A

(**CARF\_Sigma**)  
EMBL\_ERZ795034&&contig\_47960&&1548\_2448\_-1 extraction

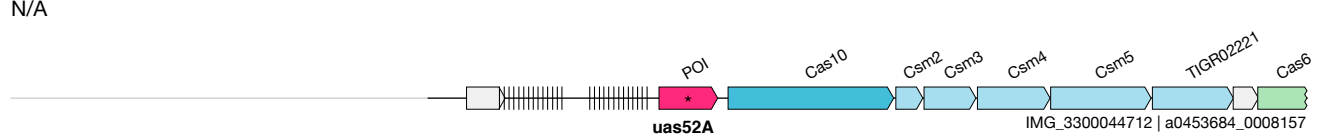

**UAS-53**  
CARF  
4 / 5.0

(**CARF\_DUF859 + many nearby genes**)  
EMBL\_ERZ894180&&contig\_692&&8871\_11661\_-1 extraction

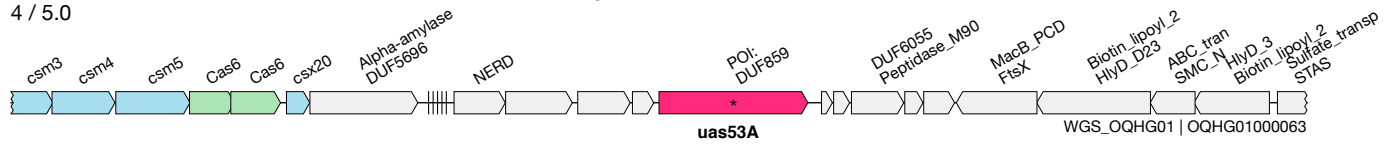

**UAS-54**  
CARF  
5 / 10.3

(**SIR2\_CHAT\_SAVED + SMODS**)  
GCA\_016712315.1&&JADJRG010000028&&300098\_302447\_1

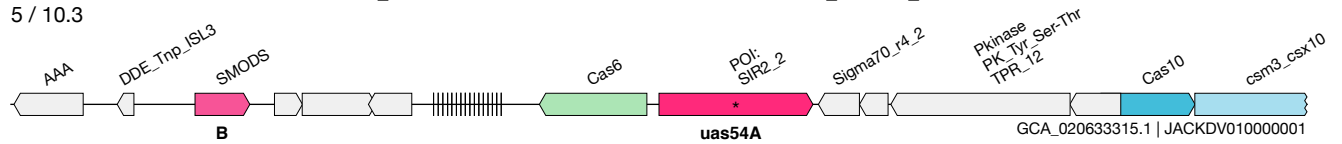

**UAS-55**  
CARF  
2 / 5.6

(**EAD7\_SAVED**)  
GCA\_020634195.1&&JACKCE010000043&&1971\_2784\_-1

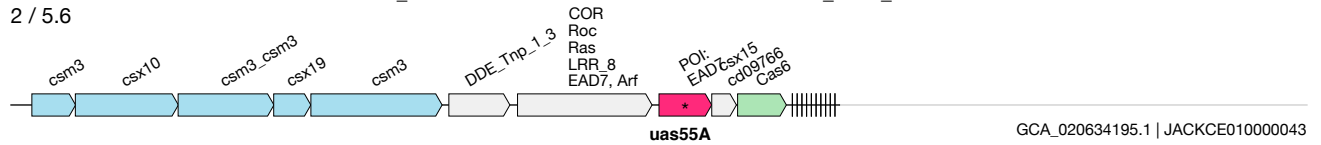

**UAS-56**  
CARF  
7 / 8.7

(**CARF\_DUF859\_ATPase + many nearby genes**)  
GCA\_900541305.1&&UQJJ01000039&&1337\_4901\_1 extraction

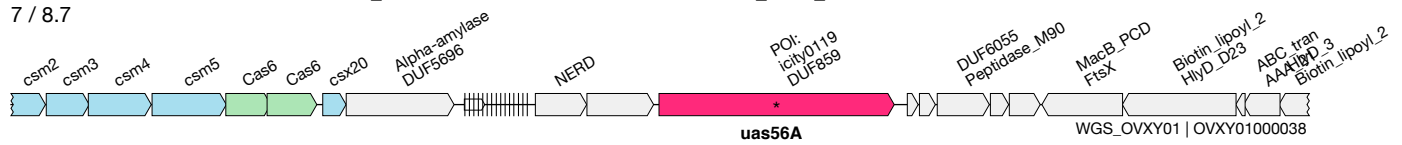

**UAS-57**  
CARF  
9 / 18.6

(**SAVED TIR**)  
GCF\_000024805.1&&NC\_013440&&7674710\_7676006\_1

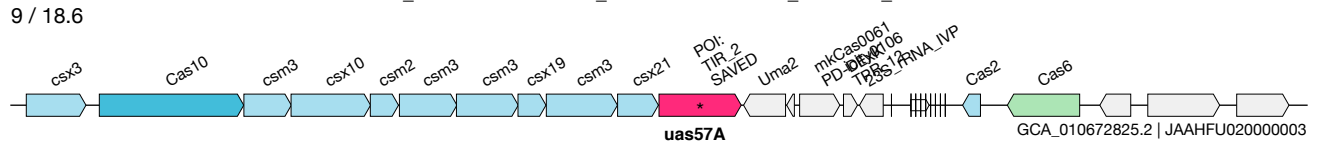

**UAS-58**  
CARF  
N/A

(**CARF\_ATPase\_HTH + RNAPol**)  
GCF\_000224065.1&&NZ\_AFWT01000006&&121441\_122968\_1 extraction 2

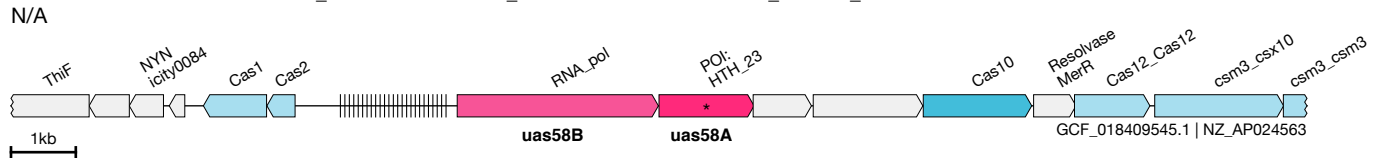

**UAS-59**  
CARF  
3 / 5.1

**(CARF\_CYTH\_HD)**

IMG\_3300002498&&TOLCLC\_10008146&&3727\_6961\_-1 extraction

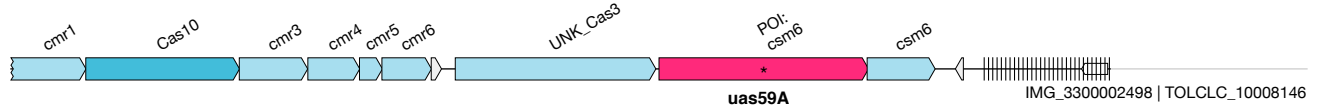

**UAS-60**  
CARF  
N/A

**(CARF\_SIR2)**

IMG\_3300009523&&a0116221\_1002542&&6420\_8025\_-1\_loci\_to\_order

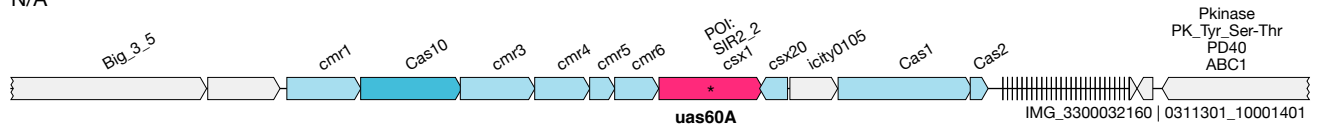

**UAS-61**  
CARF  
11 / 15.3

**(CARF\_TIR\_Mrr)**

IMG\_3300020198&&0194120\_10015339&&5702\_6689\_1 extraction

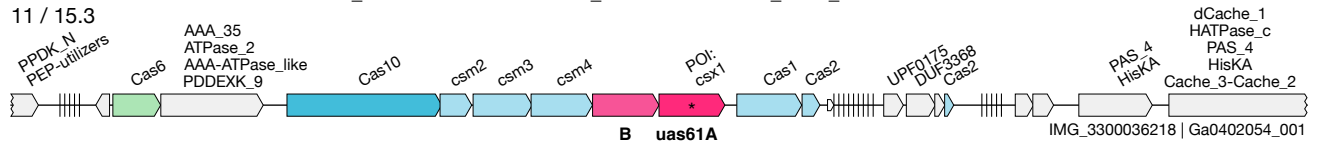

**UAS-62**  
CARF  
5 / 12.2

**(csx1 + Phage RNAPol)**

IMG\_3300026484&&a0256837\_1008848&&1106\_4061\_-1

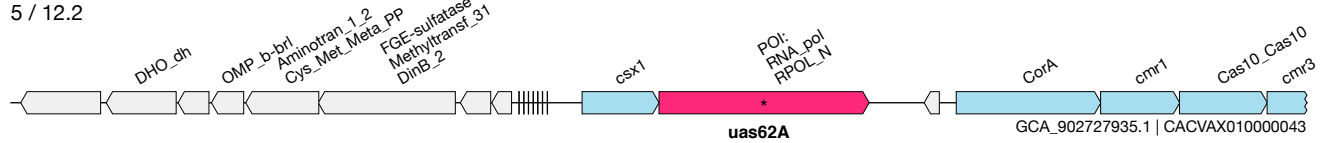

**UAS-63**  
CARF  
5 / 7.7

**(CARF\_2p\_deoxyribosyltransferase)**

IMG\_3300031539&&0307380\_10010365&&4440\_5463\_-1

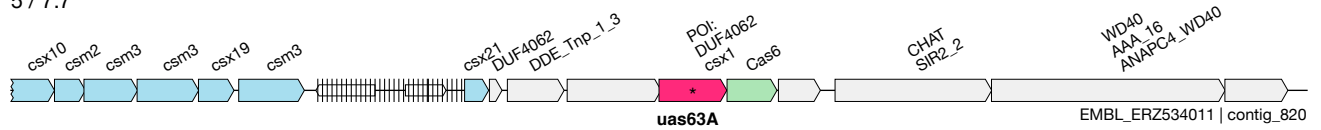

**UAS-64**  
CARF  
N/A

**(CARF\_EAD7)**

IMG\_3300031566&&0307378\_10017289&&164\_1499\_1 extraction

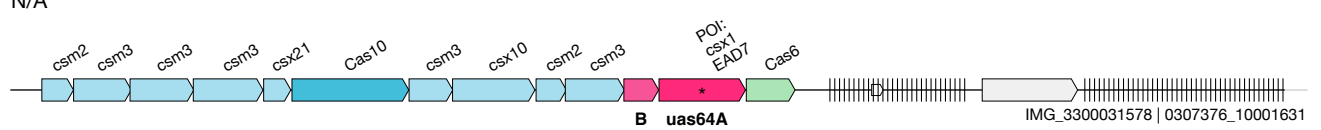

**UAS-65**  
CARF  
6 / 6.6

**(CARF\_5p\_nucleotidase)**

IMG\_3300031994&&0310691\_10021322&&2165\_3863\_1 extraction

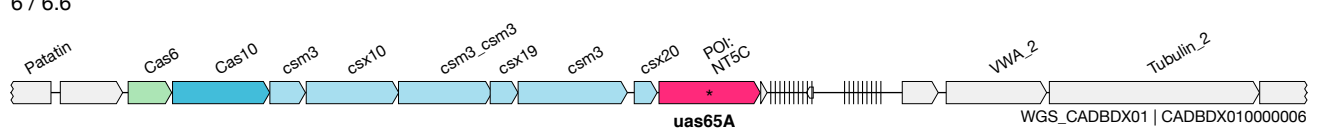

**UAS-66**  
CARF  
4 / 4.5

**(SAVED\_APH\_TCAD9)**

IMG\_3300034111&&a0335063\_0013299&&1300\_3253\_1

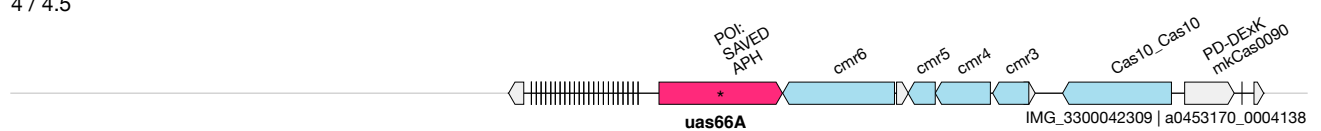

**UAS-67**  
CARF  
4 / 4.7

**(Cutinase\_Lipase\_SAVED)**

IMG\_3300042939&&a0453142\_0007685&&8027\_9725\_-1

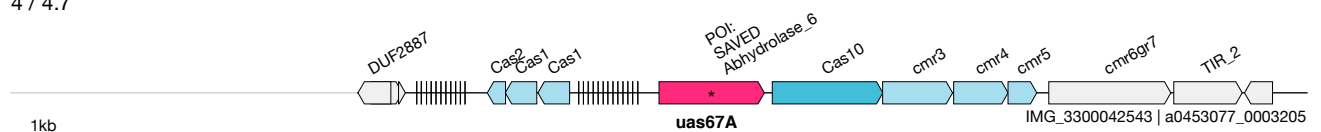

UAS-68  
CARF  
N/A

(SMODS + SAVED CHAT)  
IMG\_3300046790&&a0495499\_0000077&&7424\_8333\_1

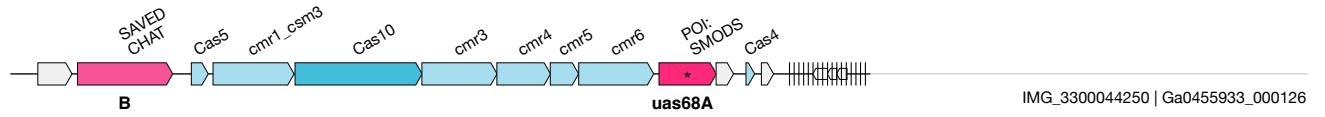

1kb

**UAS-69**  
Auxiliary  
3 / 7.0

**(methyltransferase)**  
EMBL\_ERZ1030305&&contig\_263&&8899\_9757\_1

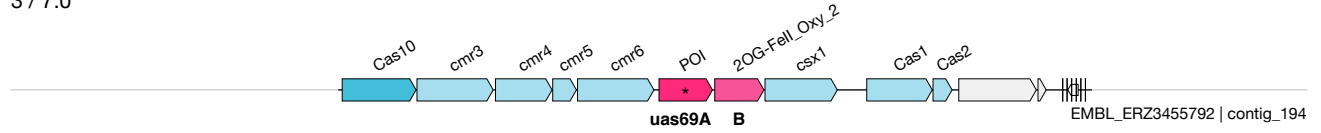

**UAS-70**  
Auxiliary  
9 / 9.3

**(vATP-synt E)**  
EMBL\_ERZ1699236&&contig\_1829&&258\_2607\_-1

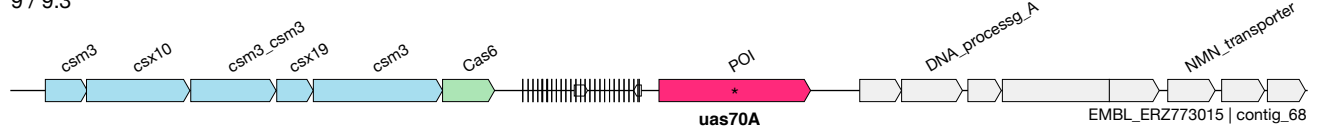

**UAS-71**  
Auxiliary  
4 / 4.7

**(NERD)**  
EMBL\_ERZ1764562&&contig\_378&&16539\_17331\_1

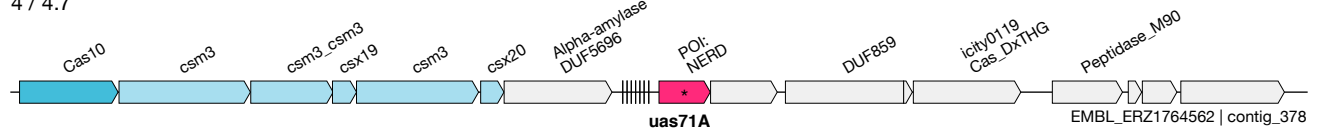

**UAS-72**  
Auxiliary  
20 / 26.7

**(multi-gene system including greA greB)**  
EMBL\_ERZ3455816&&contig\_9406&&2751\_3312\_1

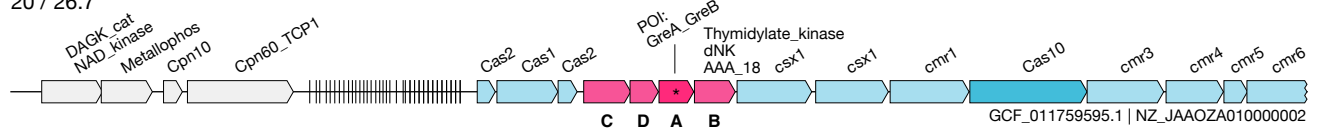

**UAS-73**  
Auxiliary  
7 / 10.5

**(Mrr nuclease)**  
EMBL\_ERZ405284&&contig\_1793&&4535\_5441\_1

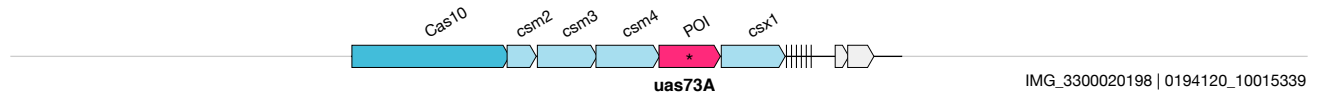

**UAS-74**  
Auxiliary  
2 / 3.4

**(PKinase)**  
EMBL\_ERZ4560480&&contig\_4482&&7569\_10323\_-1

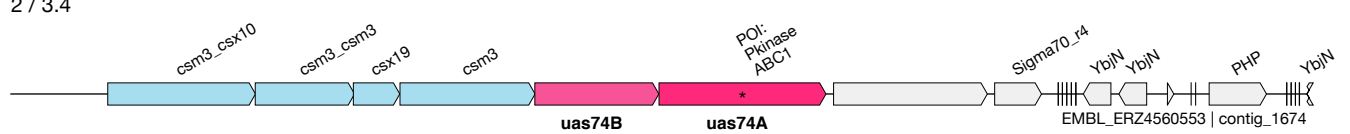

**UAS-75**  
Auxiliary  
7 / 7.5

**(Sigma\_factor + Csx1 + large Csx1)**  
EMBL\_ERZ4560494&&contig\_2628&&7202\_8435\_1

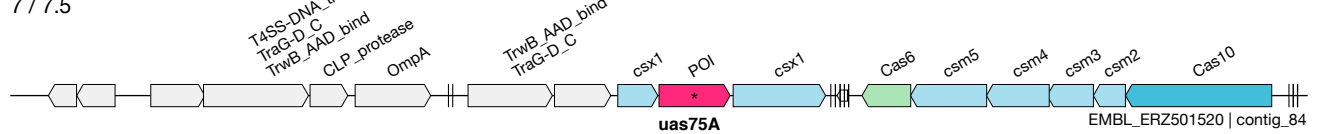

**UAS-76**  
Auxiliary  
41 / 53.8

**(HTH\_M78 peptidase)**  
EMBL\_ERZ4560656&&contig\_7640&&76\_1108\_-1

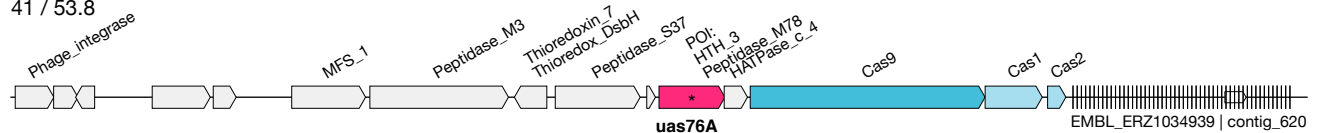

**UAS-77**  
Auxiliary  
3 / 5.5

**(DUF2283)**  
EMBL\_ERZ584659&&contig\_1773&&510\_1521\_-1

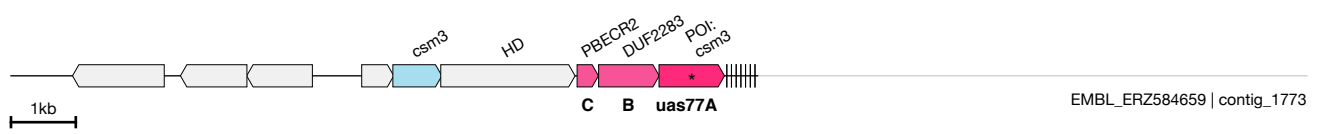

1kb

**UAS-78**  
Auxiliary  
7 / 7.7

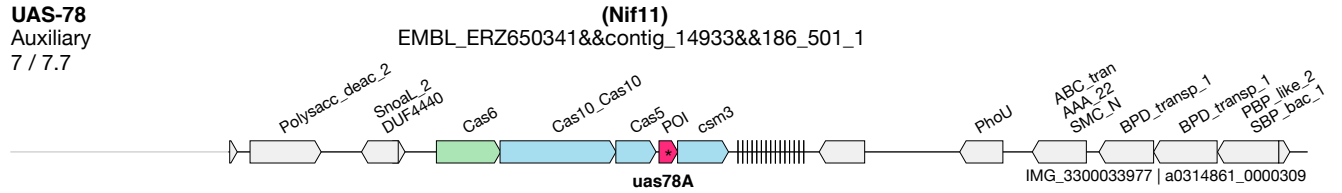

**UAS-79**  
Auxiliary  
8 / 8.9

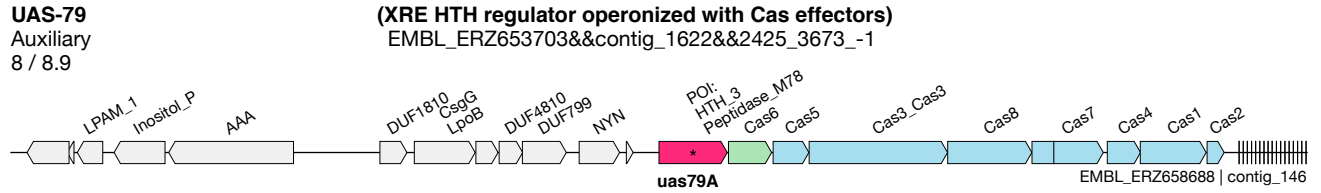

**UAS-80**  
Auxiliary  
5 / 5.1

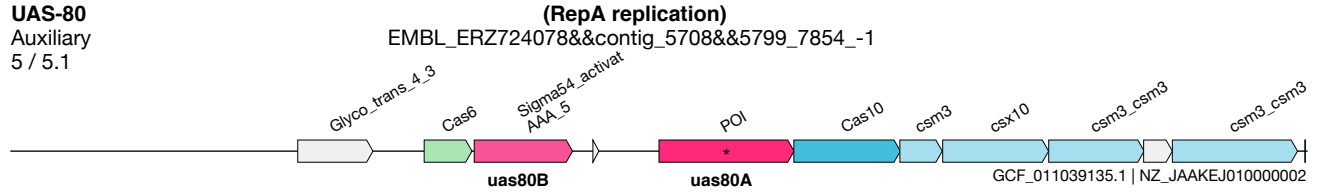

**UAS-81**  
Auxiliary  
3 / 3.0

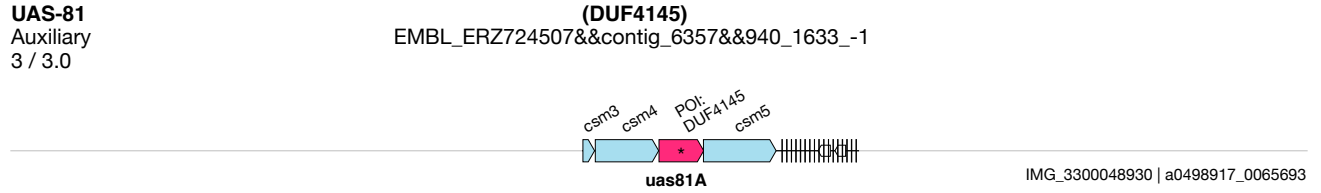

**UAS-82**  
Auxiliary  
4 / 7.6

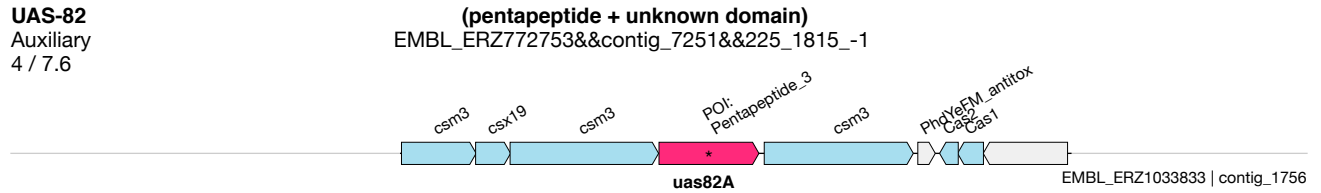

**UAS-83**  
Auxiliary  
8 / 8.0

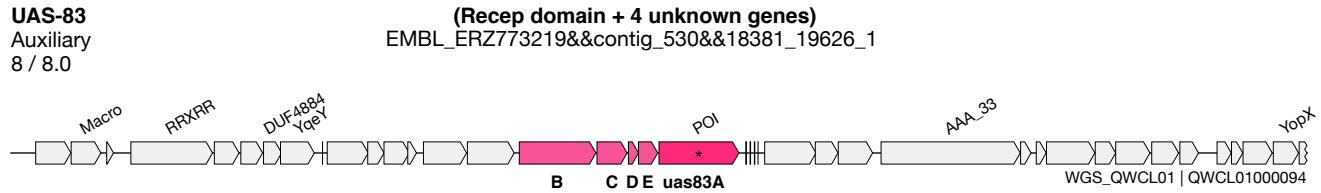

**UAS-84**  
Auxiliary  
2 / 5.3

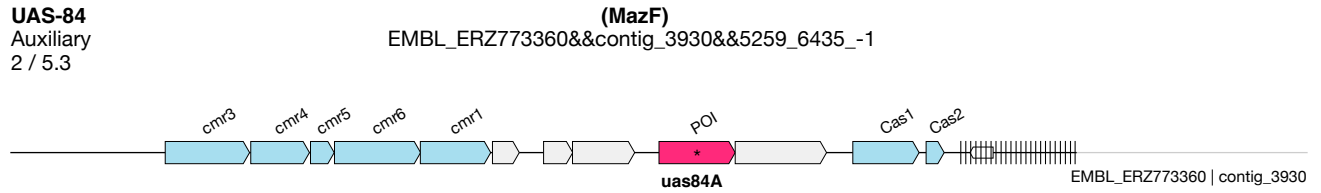

**UAS-31**  
Auxiliary  
10 / 16.4

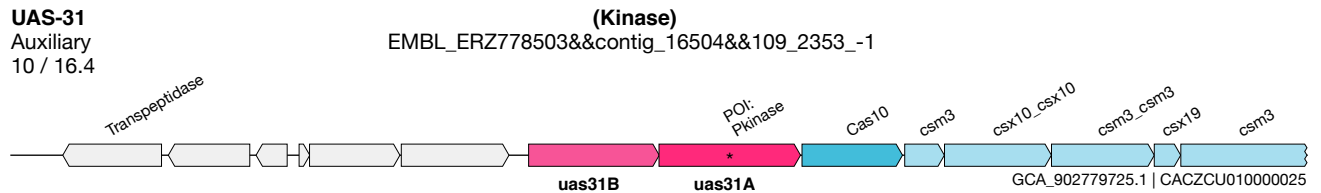

**UAS-85**  
Auxiliary  
2 / 5.5

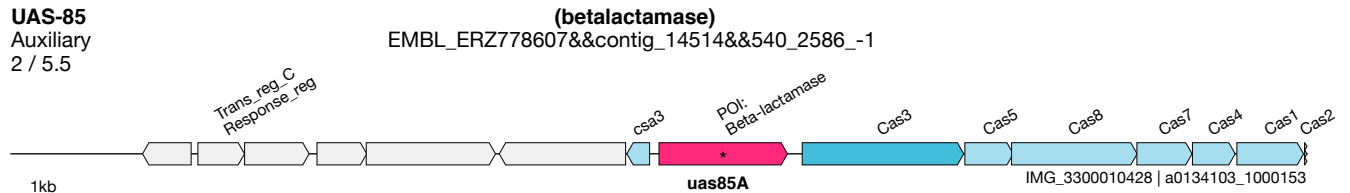

1kb

**UAS-86**  
Auxiliary  
3 / 4.0

**(large Sigma factor)**  
EMBL\_ERZ779846&&contig\_3976&&4008\_5559\_-1

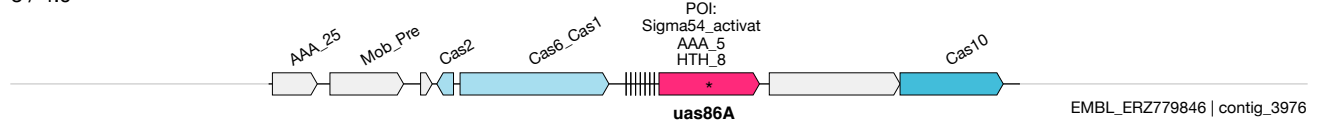

**UAS-87**  
Auxiliary  
14 / 25.6

**(vwa + PPC + kinase system)**  
EMBL\_ERZ795109&&contig\_975&&4795\_5770\_1

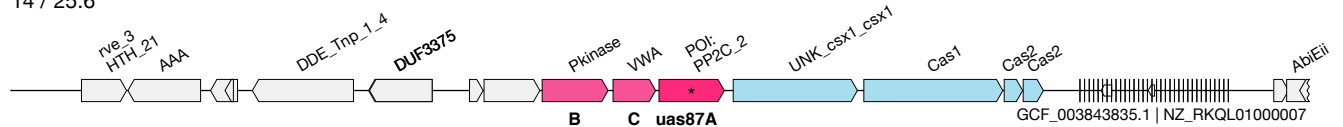

**UAS-24**  
Auxiliary  
3 / 3.0

**(RNaseT)**  
EMBL\_ERZ827088&&contig\_3603&&12691\_12832\_1

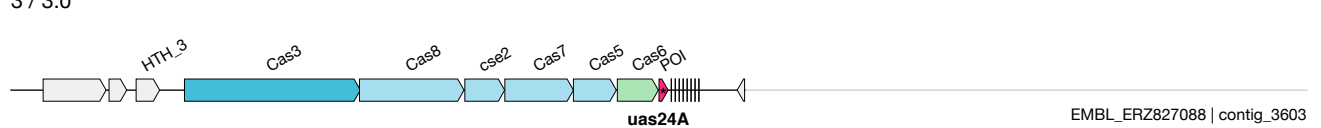

**UAS-88**  
Auxiliary  
6 / 7.2

**(Sigma factor + Csx1)**  
EMBL\_ERZ842392&&contig\_23636&&3690\_4530\_1

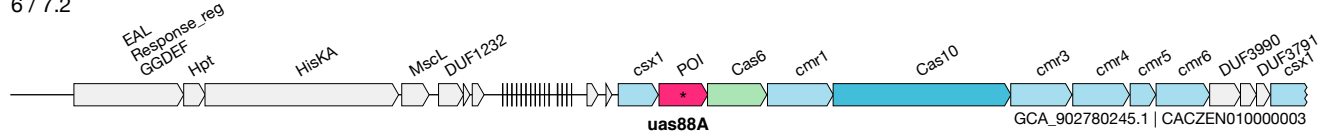

**UAS-19**  
Auxiliary  
19 / 35.1

**(Cas9 or Cas12 associated WYL)**  
EMBL\_MGYG000290606&&MGYG000290606\_2&&40\_988\_-1

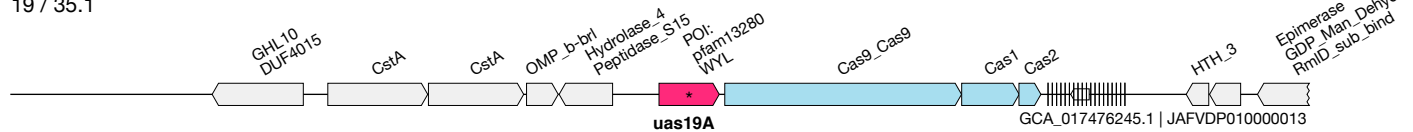

**UAS-23**  
Auxiliary  
3 / 6.5

**(unknown + DUF2791 + DUF2791\_ATPase)**  
GCA\_001508235.1&&LGFR01000093&&2560\_3565\_-1

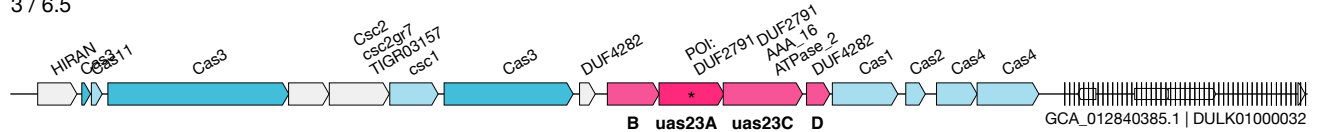

**UAS-89**  
Auxiliary  
8 / 13.6

**(unknown accessory)**  
GCA\_001570385.1&&BBYL01000030&&535\_1639\_-1

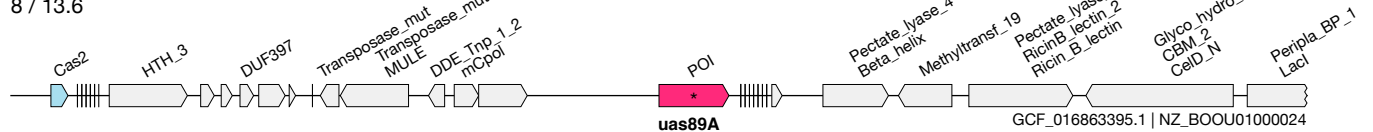

**UAS-90**  
Auxiliary  
9 / 19.4

**(nurA dsDNA break repair + DUF87)**  
GCA\_003086515.1&&QEFL01000015&&20967\_22101\_-1

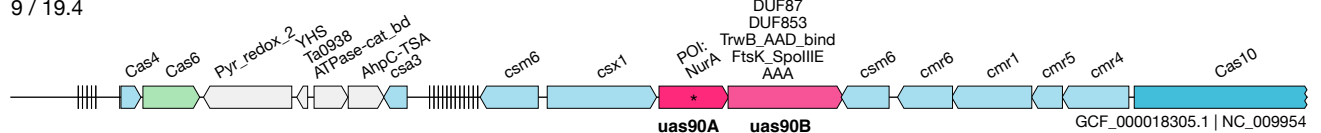

**UAS-91**  
Auxiliary  
3 / 6.8

**(vWA + FHA + PP2C)**  
GCA\_011362195.1&&DTDN01000009&&39236\_40742\_-1

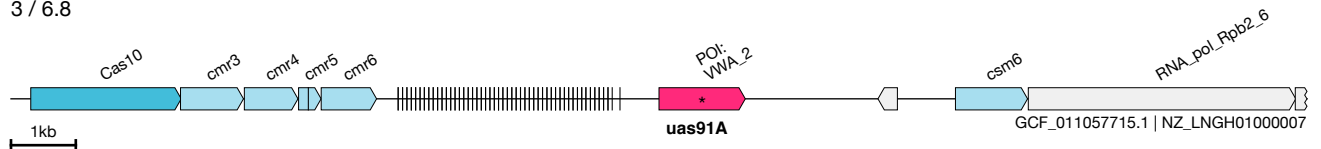

**UAS-92**  
Auxiliary  
13 / 17.6

(DUF2281)

GCA\_013140405.1&&JABFSV010000514&&13559\_13769\_-1

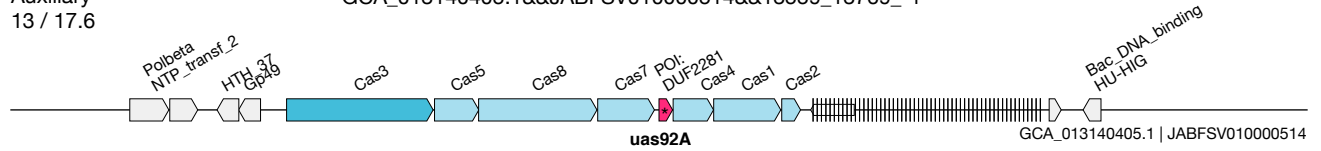

**UAS-93**  
Auxiliary  
63 / 127.1

(PAP\_phosphatase CorA)

GCA\_015662405.1&&DQUE01000208&&5320\_7480\_-1

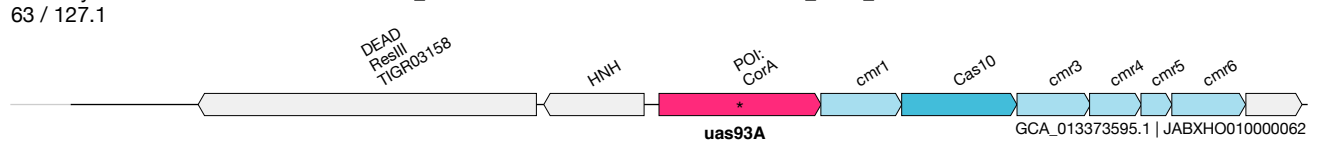

**UAS-28**  
Auxiliary  
6 / 7.3

(Y1 TPase type III)

GCA\_017544725.1&&JAFYDR010000170&&27158\_28184\_-1

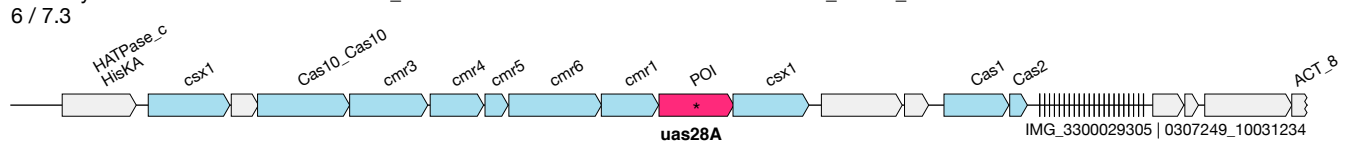

**UAS-94**  
Auxiliary  
8 / 14.3

(DUF3800\_TPR)

GCA\_017934005.1&&JAGBKJ010000834&&818\_3053\_-1

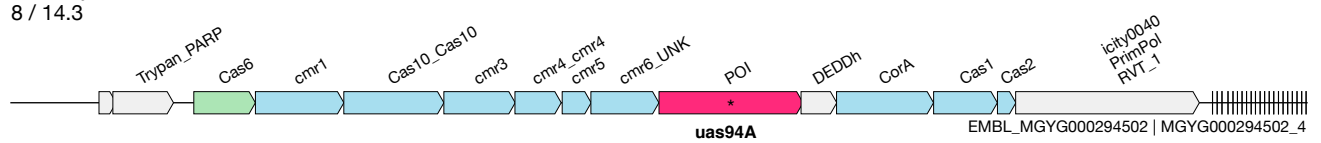

**UAS-95**  
Auxiliary  
25 / 34.3

(RAMA + DUF444 + PIN)

GCA\_019359445.1&&JAHHHJ010000029&&16098\_16602\_-1

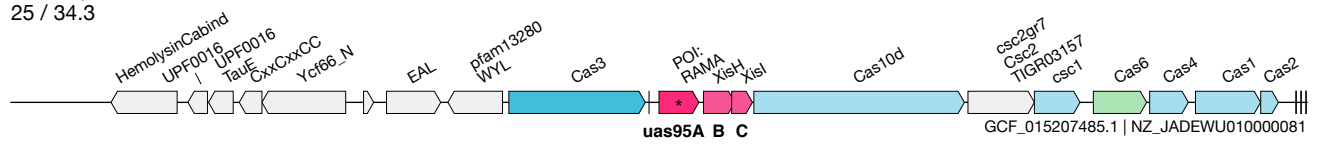

**UAS-96**  
Auxiliary  
N/A

(unknown transmembrane protein)

GCA\_020434175.1&&JAGR BH010000503&&340\_1450\_-1

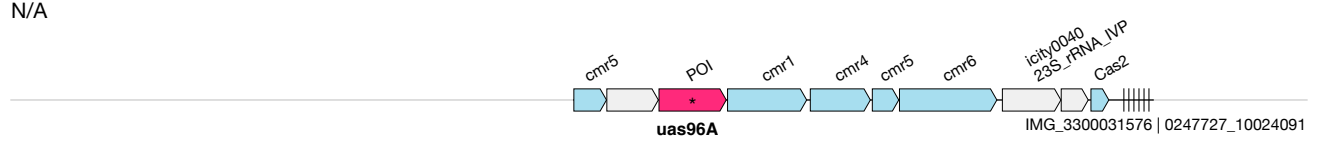

**UAS-97**  
Auxiliary  
2 / 4.2

(Fic Cascade)

GCA\_903847485.1&&CAINDV010000696&&9392\_10559\_-1

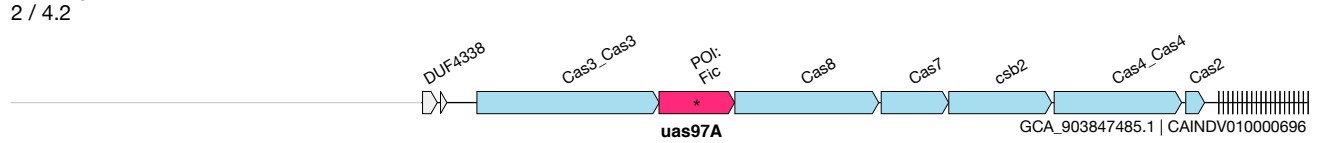

**UAS-98**  
Auxiliary  
5 / 6.3

(TPR\_MALT)

GCA\_910584945.1&&CAJUDY010000014&&24554\_26873\_-1

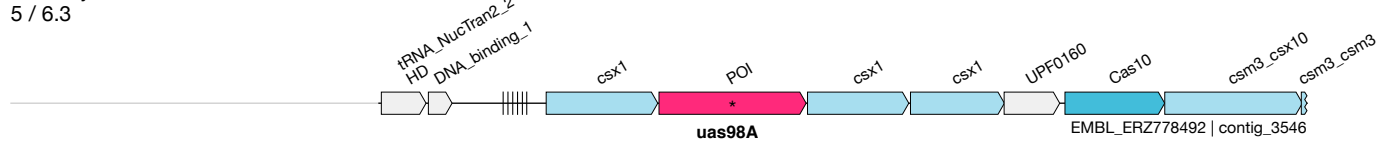

**UAS-30**  
Auxiliary  
6 / 6.0

(UvrD\_NERD nuclease)

GCF\_000419585.1&&NZ\_ATTH01000001&&941528\_943577\_-1

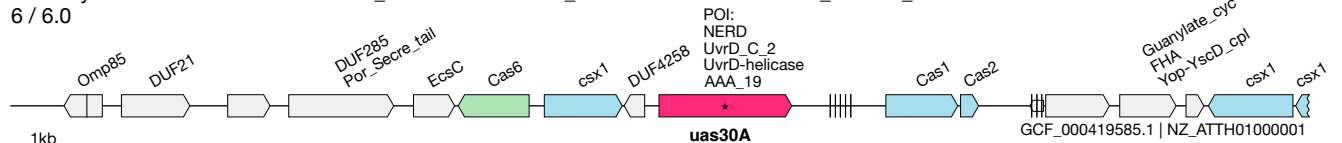



**UAS-99**  
Auxiliary  
20 / 37.7

**(Radical SAM protein)**

GCF\_001029445.1&&NZ\_LDOT01000053&&7692\_9432\_1

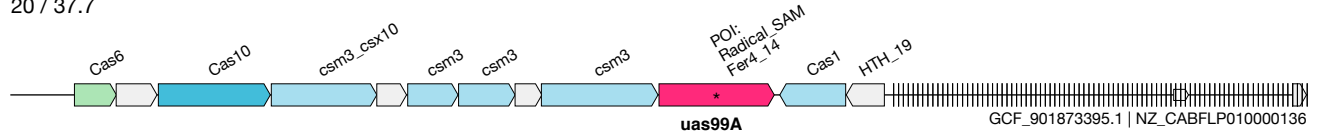

**UAS-100**  
Auxiliary  
6 / 9.9

**(wWA + kinase)**

GCF\_001655635.1&&NZ\_LSNH01000001&&2031044\_2032025\_-1

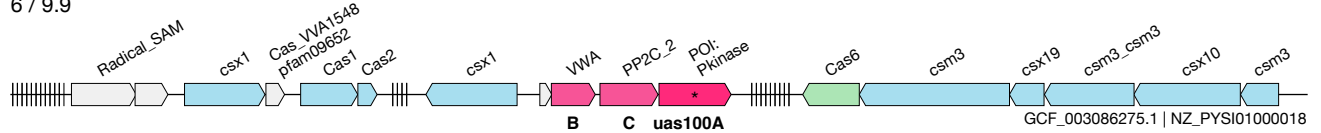

**UAS-101**  
Auxiliary  
19 / 47.0

**(DUF2204)**

GCF\_003668875.1&&NZ\_RAWM01000178&&1907\_2396\_-1

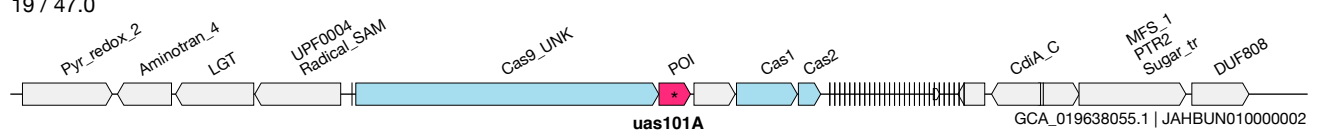

**UAS-102**  
Auxiliary  
3 / 3.0

**(DUF5343 + Helicase\_HNH\_ResIII)**

GCF\_016526145.1&&NZ\_JADDUE010000010&&220137\_220869\_-1

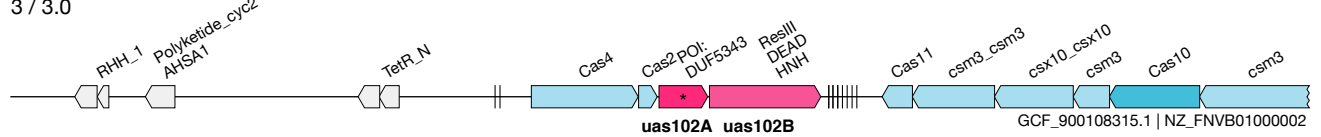

**UAS-103**  
Auxiliary  
2 / 3.0

**(TPR HATPase)**

GCF\_016757215.1&&NZ\_JAESIY010000005&&313654\_315544\_1

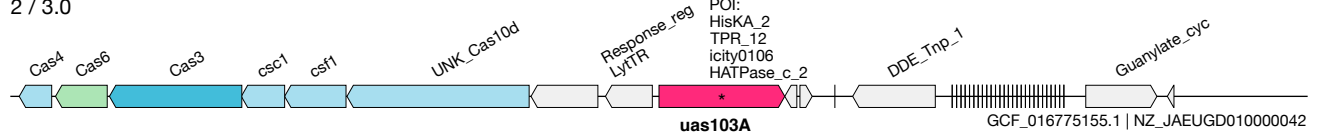

**UAS-104**  
Auxiliary  
3 / 3.0

**(ATPase + Metallophosphatase)**

GCF\_018502485.1&&NZ\_CP075546&&993250\_997099\_1

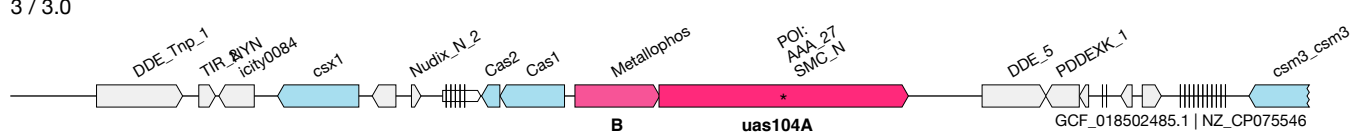

**UAS-105**  
Auxiliary  
5 / 5.6

**(M78 peptidase)**

GCF\_021531665.1&&NZ\_JADYUH010000077&&9506\_10499\_-1

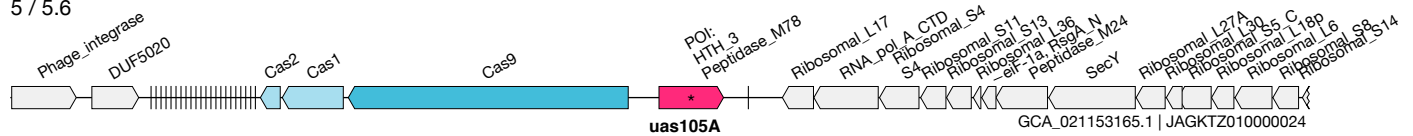

**UAS-106**  
Auxiliary  
3 / 3.0

**(DUF3800)**

GCF\_900453405.1&&NZ\_UGPM01000003&&1785257\_1786514\_-1

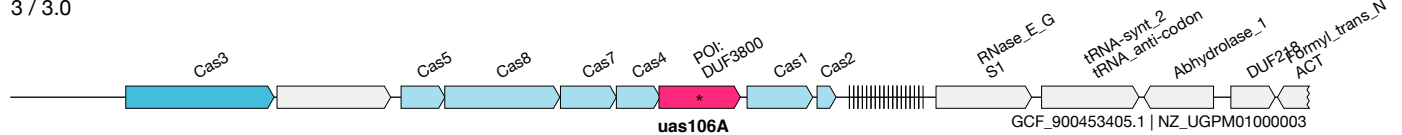

**UAS-107**  
Auxiliary  
17 / 25.5

**(Toprim)**

GCF\_902500215.1&&NZ\_CABVOU010000021&&55311\_56466\_-1

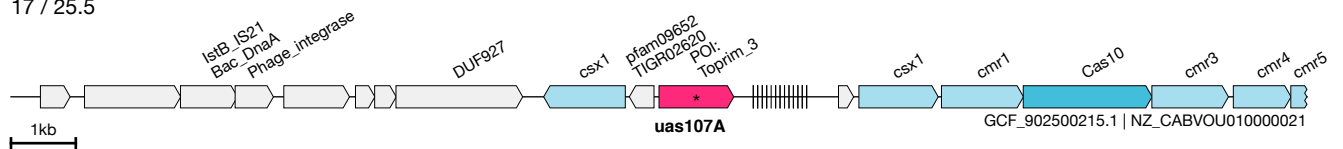

1kb

**UAS-108**Auxiliary  
7 / 16.3**(DUF433)**

IMG\_3300000574&amp;&amp;7J11328\_10007417&amp;&amp;1272\_1539\_-1

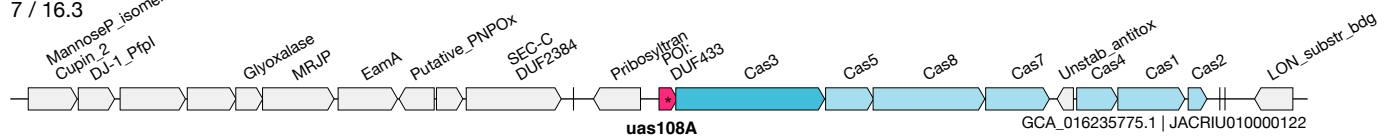**UAS-109**Auxiliary  
2 / 5.3**(DUF4407 + transpeptidase)**

IMG\_3300000574&amp;&amp;7J11328\_10033202&amp;&amp;130\_1651\_1

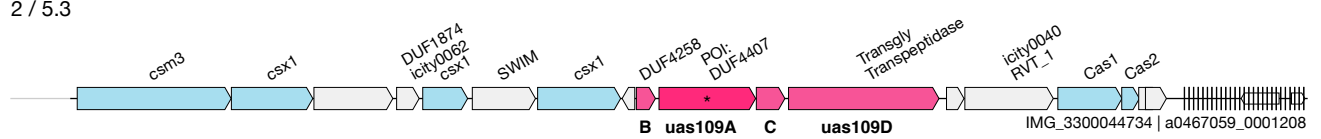**UAS-110**Auxiliary  
2 / 3.5**(mega peptidase)**

IMG\_3300001598&amp;&amp;EMG\_10018732&amp;&amp;309\_3072\_1

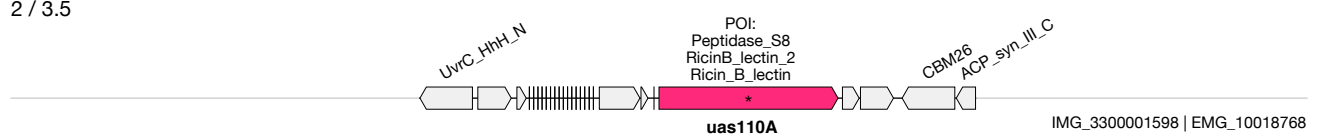**UAS-111**Auxiliary  
2 / 4.4**(TIR cascade)**

IMG\_3300002223&amp;&amp;7J26845\_10007859&amp;&amp;1305\_2472\_1

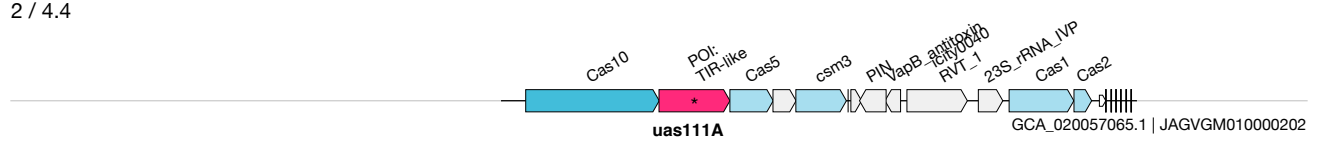**UAS-29**Auxiliary  
4 / 8.6**(Phage RNAPol)**

IMG\_33000003177&amp;&amp;DffDRAFT\_1003423&amp;&amp;1014\_3828\_-1

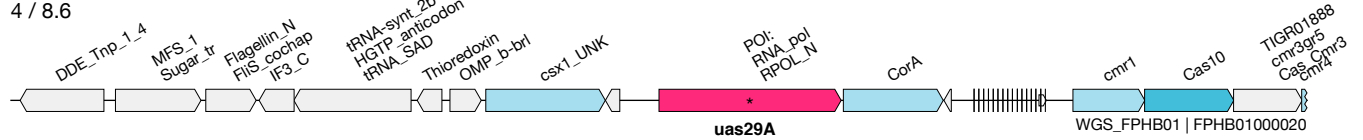**UAS-112**Auxiliary  
N/A**(Csx20 operonized with Alpha Amylase)**

IMG\_3300004628&amp;&amp;a0070399\_1037568&amp;&amp;498\_2109\_1

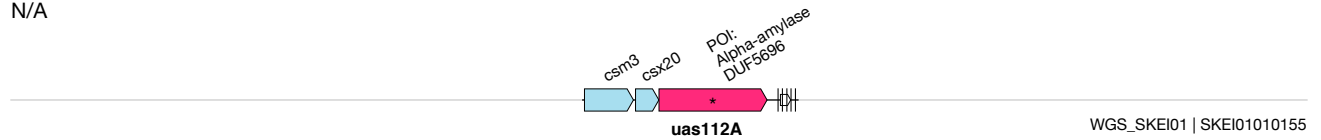**UAS-113**Auxiliary  
10 / 14.6**(RNaseH)**

IMG\_3300005573&amp;&amp;a0078972\_1000107&amp;&amp;101916\_102516\_1

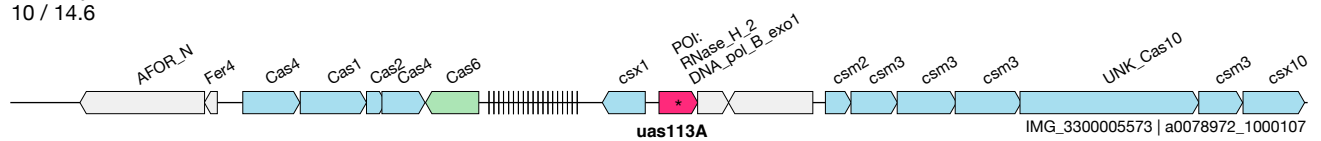**UAS-114**Auxiliary  
5 / 5.5**(Tfb2\_Cas3Cterminus\_WYL)**

IMG\_3300007521&amp;&amp;0105044\_10068709&amp;&amp;481\_2728\_1

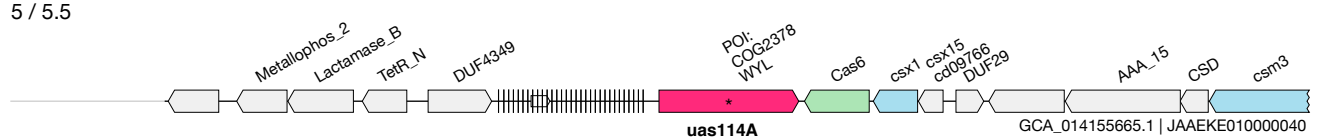**UAS-115**Auxiliary  
N/A**(SLATT)**

IMG\_3300007964&amp;&amp;a0100400\_1019481&amp;&amp;1335\_1944\_-1

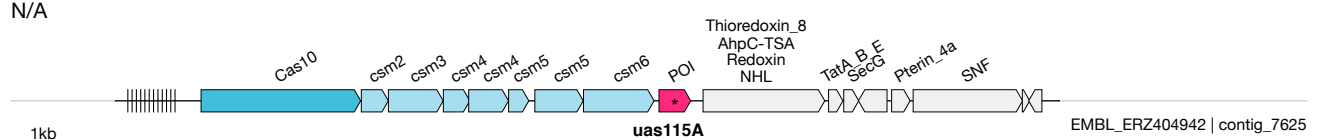

1kb

**UAS-116**Auxiliary  
21 / 38.1**(Moca oxoreductase + SDR)**

IMG\_3300008252&amp;&amp;0105357\_10033588&amp;&amp;329\_1373\_1

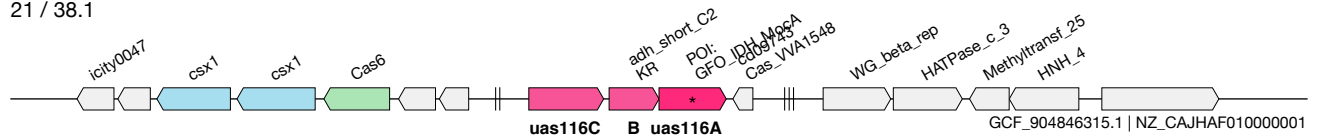**UAS-117**Auxiliary  
3 / 4.8**(DUF4231)**

IMG\_3300009032&amp;&amp;0105048\_10143319&amp;&amp;1427\_2051\_-1

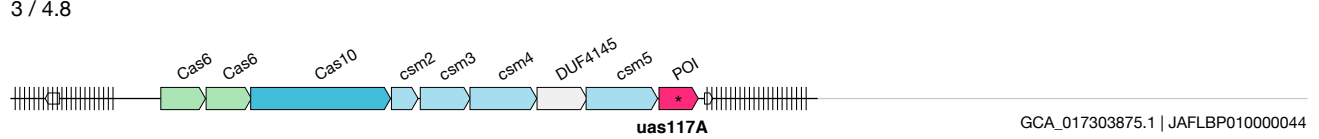**UAS-118**Auxiliary  
12 / 23.7**(DUF3891)**

IMG\_3300009083&amp;&amp;0105047\_10063153&amp;&amp;274\_994\_-1

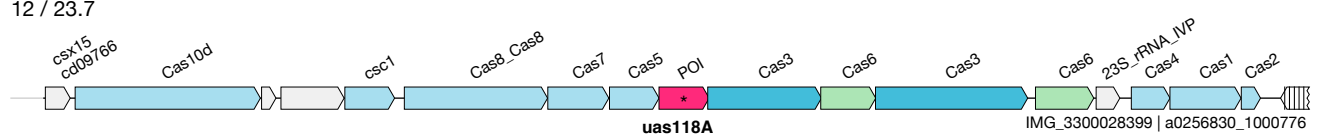**UAS-119**Auxiliary  
6 / 9.9**(DUF5679, zinc ribbon)**

IMG\_3300009175&amp;&amp;0073936\_10076949&amp;&amp;1196\_1451\_-1

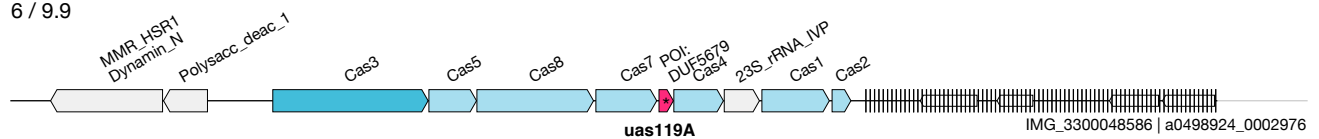**UAS-120**Auxiliary  
2 / 4.1**(DUF2225)**

IMG\_3300009503&amp;&amp;0123519\_10124867&amp;&amp;69\_1659\_-1

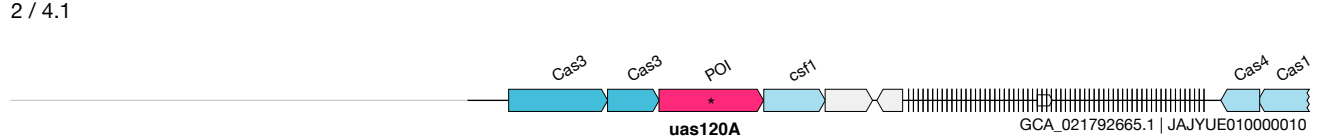**UAS-121**Auxiliary  
15 / 41.0**(RNAPol + Sigma\_factor + unknown gene)**

IMG\_3300009585&amp;&amp;a0105160\_1000939&amp;&amp;4188\_8637\_1

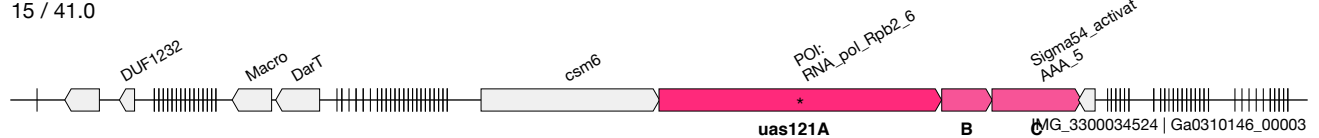**UAS-122**Auxiliary  
15 / 36.2**(PRIA3 + zf)**

IMG\_3300012931&amp;&amp;0153915\_10003429&amp;&amp;308\_1193\_1

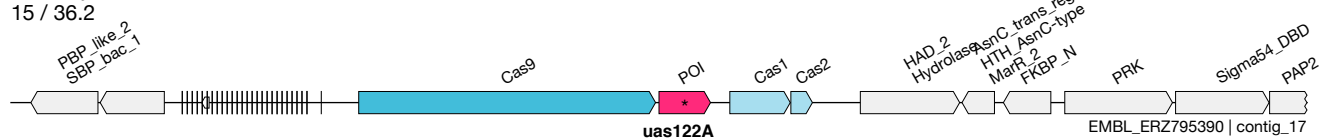**UAS-22**Auxiliary  
3 / 8.1**(Cut8\_TPR)**

IMG\_3300012943&amp;&amp;0164241\_10011111&amp;&amp;1329\_2733\_-1

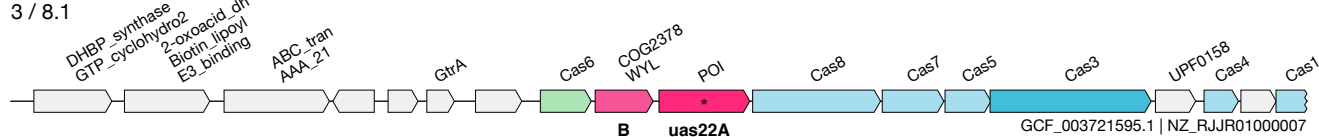**UAS-21**Auxiliary  
3 / 3.7**(Cas13b + CorA)**

IMG\_3300012983&amp;&amp;0123349\_10003896&amp;&amp;1100\_3251\_1

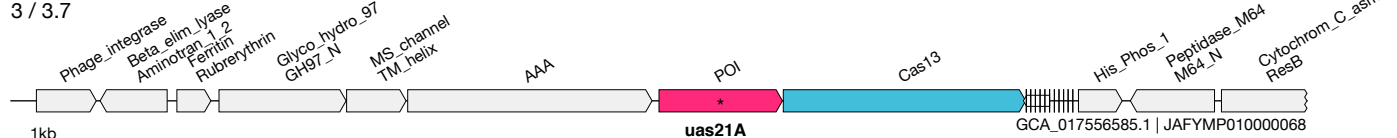

1kb

**UAS-123**  
Auxiliary  
2 / 3.2

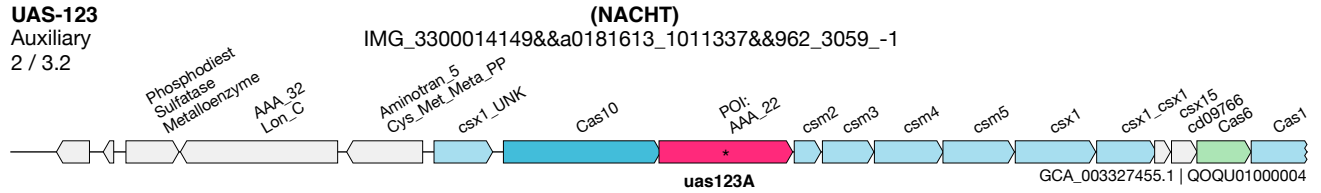

**UAS-124**  
Auxiliary  
3 / 3.3

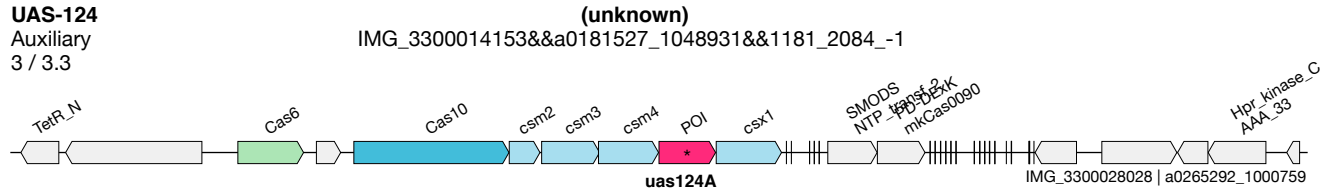

**UAS-125**  
Auxiliary  
11 / 24.8

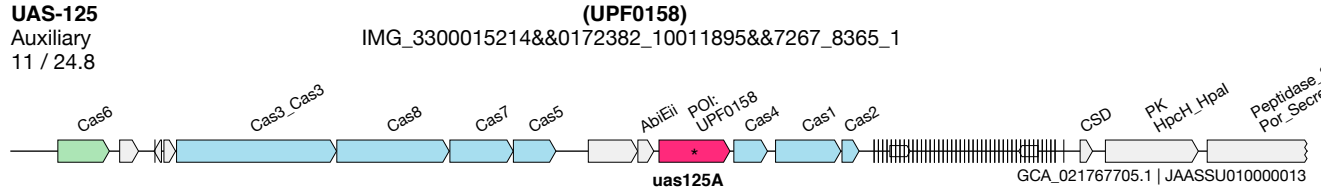

**UAS-126**  
Auxiliary  
3 / 6.4

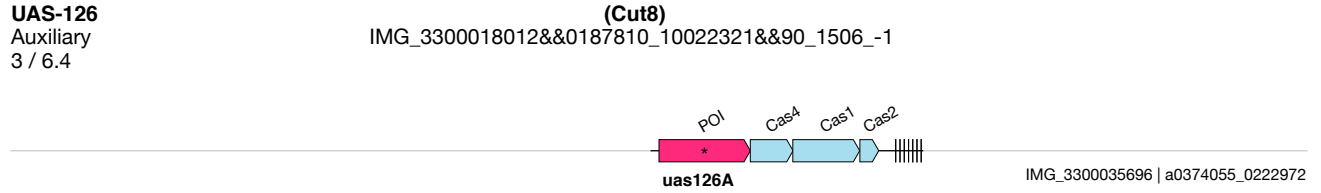

**UAS-26**  
Auxiliary  
4 / 4.0

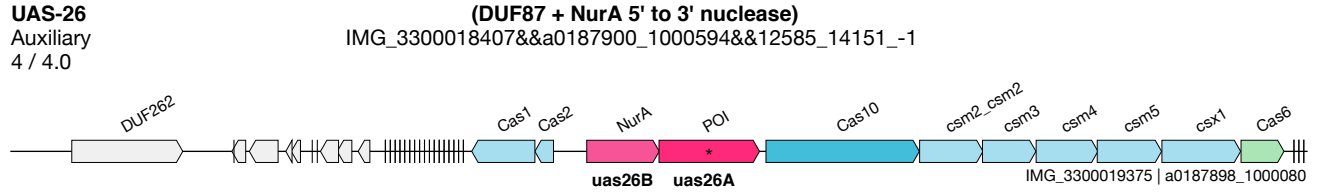

**UAS-127**  
Auxiliary  
3 / 7.4

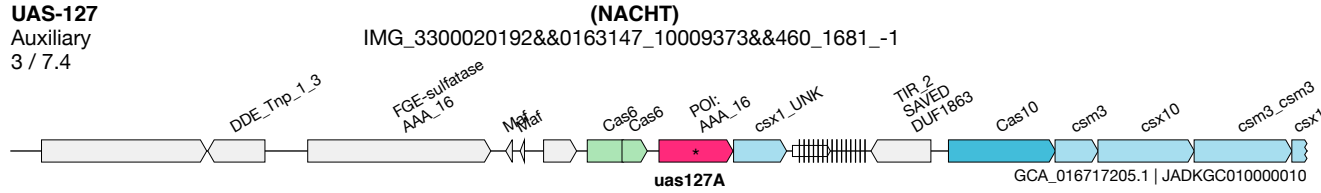

**UAS-128**  
Auxiliary  
N/A

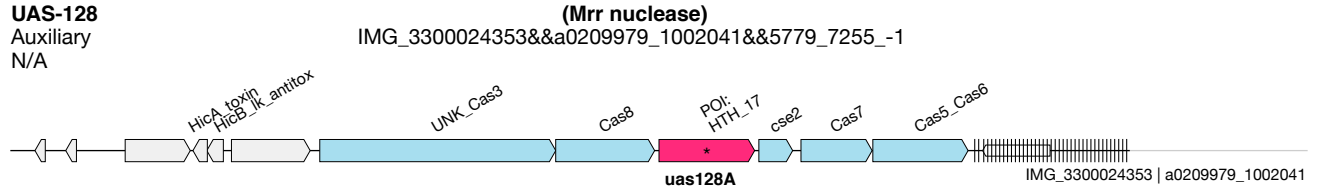

**UAS-129**  
Auxiliary  
16 / 43.6

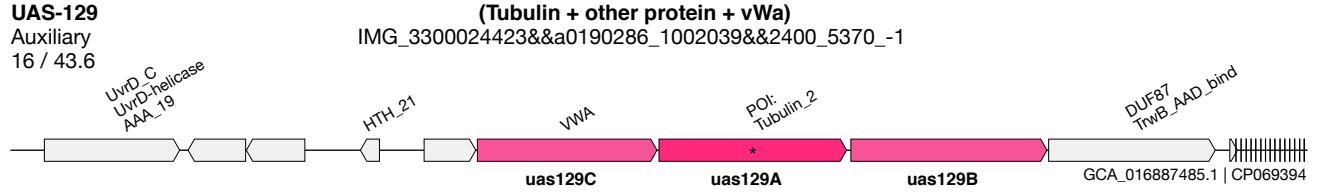

**UAS-130**  
Auxiliary  
5 / 13.1

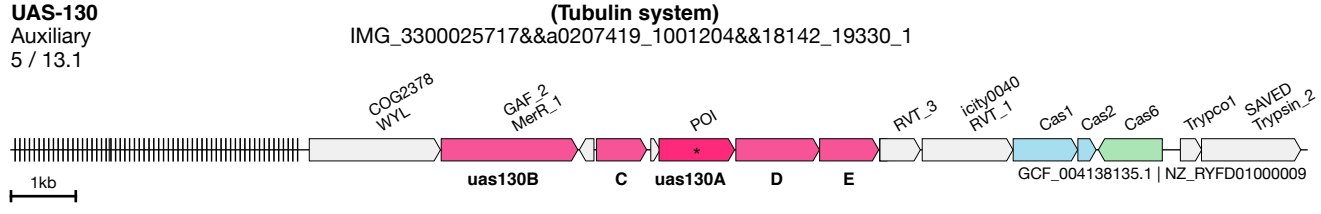

**UAS-131**  
Auxiliary  
8 / 18.9

(TIR2)  
IMG\_3300026304&&a0209240\_1021588&&337\_1153\_1

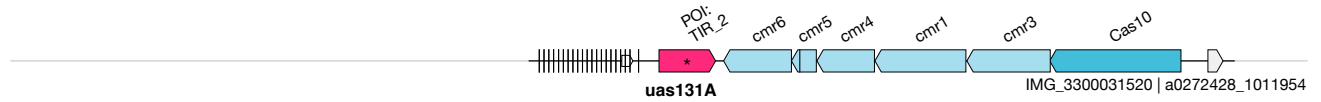

**UAS-132**  
Auxiliary  
20 / 27.4

(Cas9 associated Y1)  
IMG\_3300026516&&a0209573\_1000325&&56350\_57046\_-1

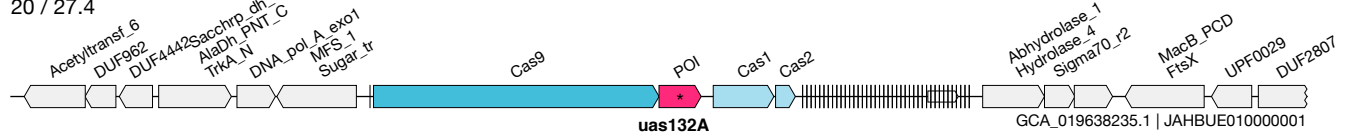

**UAS-133**  
Auxiliary  
5 / 6.4

(TPR Rho RNA binding)  
IMG\_3300026546&&0256913\_10013832&&2\_1481\_1

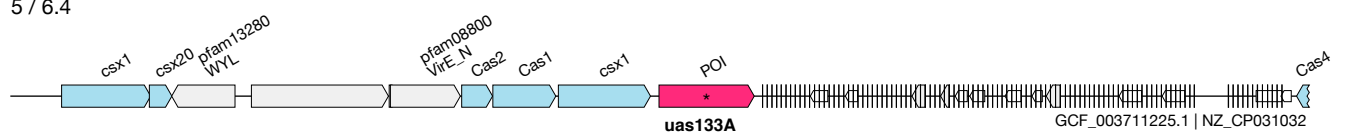

**UAS-18**  
Auxiliary  
4 / 6.6

(toprim)  
IMG\_3300026546&&0256913\_10022199&&462\_1617\_-1

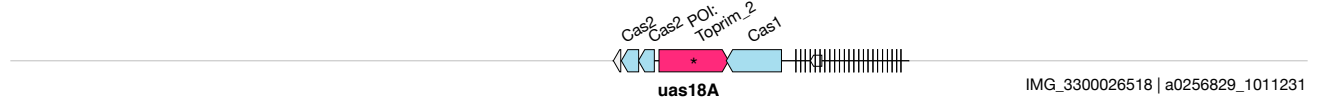

**UAS-134**  
Auxiliary  
15 / 29.8

(WYL operonized with cascade)  
IMG\_3300027878&&0209181\_10066870&&0\_1041\_1

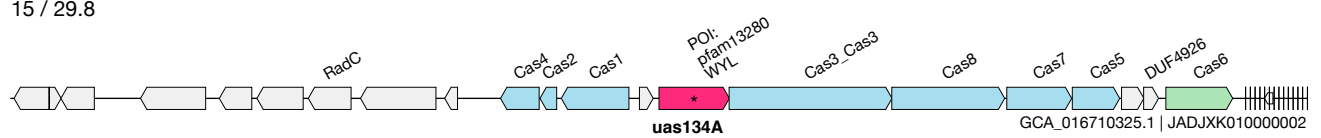

**UAS-135**  
Auxiliary  
3 / 3.0

(ATPase\_DUF4435 + Cas12)  
IMG\_3300028048&&0256405\_10015800&&2772\_4671\_-1

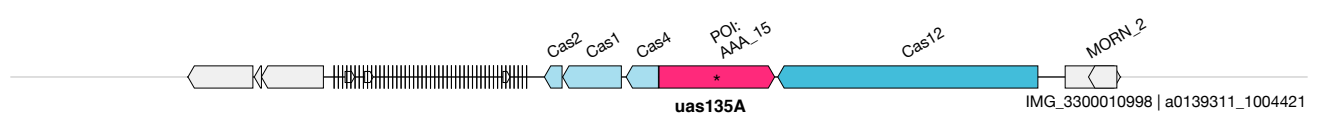

**UAS-136**  
Auxiliary  
4 / 6.7

(DUF6155)  
IMG\_3300028191&&a0265595\_1000410&&37454\_38072\_1

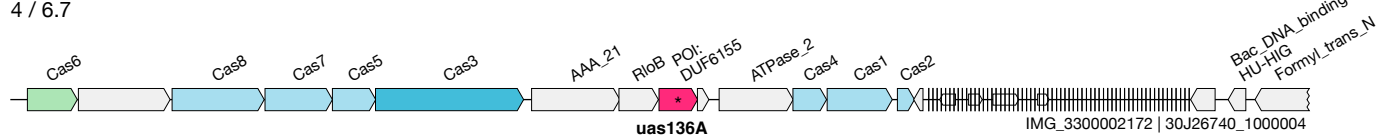

**UAS-137**  
Auxiliary  
6 / 6.7

(Holliday Junction Resolvase)  
IMG\_3300031520&&a0272428\_1002147&&25604\_25976\_-1

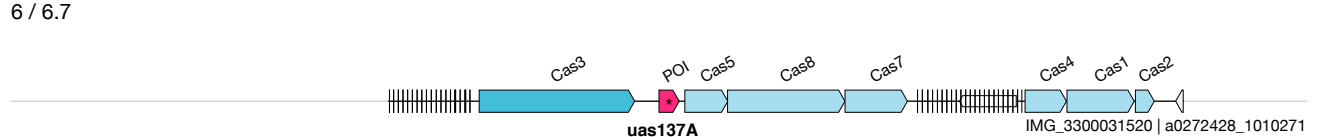

**UAS-138**  
Auxiliary  
5 / 11.2

(TIR)  
IMG\_3300031631&&a0307987\_1000023&&70180\_70972\_-1

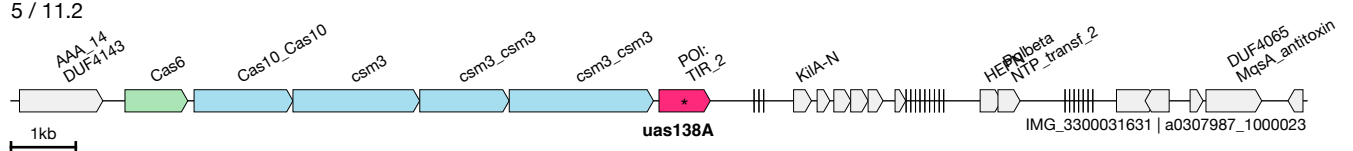

**UAS-139**Auxiliary  
3 / 4.3**(metal system)**

IMG\_3300031654&amp;&amp;0315549\_1044866&amp;&amp;183\_2397\_-1

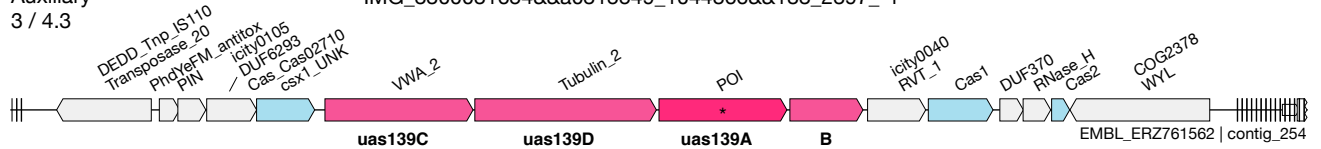**UAS-140**Auxiliary  
2 / 3.0**(DUF5919)**

IMG\_3300031670&amp;&amp;0307374\_10003486&amp;&amp;16416\_17127\_-1

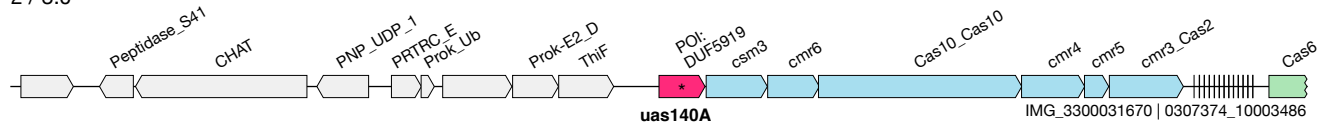**UAS-141**Auxiliary  
2 / 3.9**(PRiA4 ORF3)**

IMG\_3300031911&amp;&amp;0307412\_1000093&amp;&amp;68229\_68721\_-1

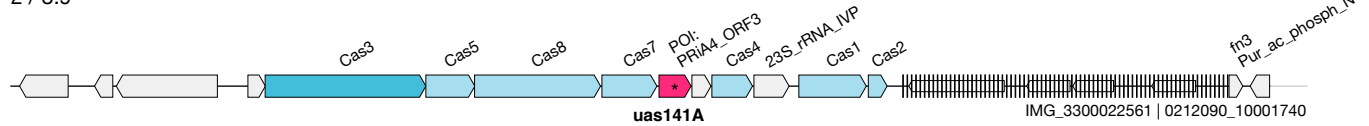**UAS-142**Auxiliary  
3 / 7.2**(TPR Protein Kinase)**

IMG\_3300032272&amp;&amp;0316189\_10000814&amp;&amp;17931\_20814\_-1

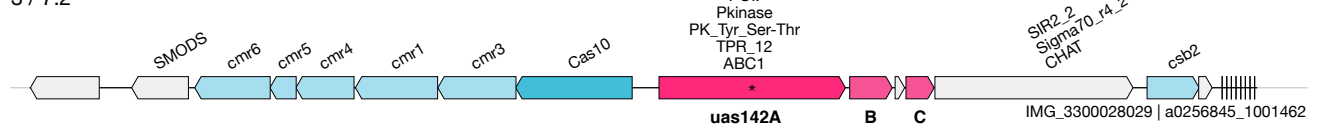**UAS-143**Auxiliary  
3 / 3.0**(EamA\_F420H2\_quin\_red)**

IMG\_3300033167&amp;&amp;0334898\_1003770&amp;&amp;3048\_4593\_-1

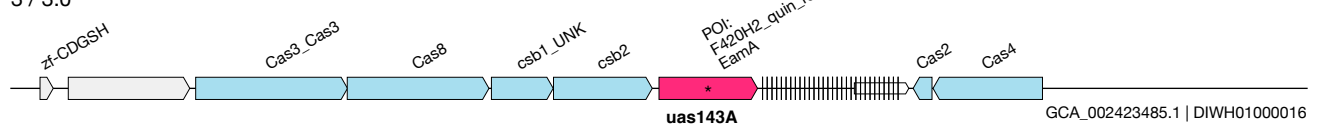**UAS-144**Auxiliary  
24 / 48.9**(TPR)**

IMG\_3300033463&amp;&amp;0310690\_10163143&amp;&amp;217\_2491\_-1

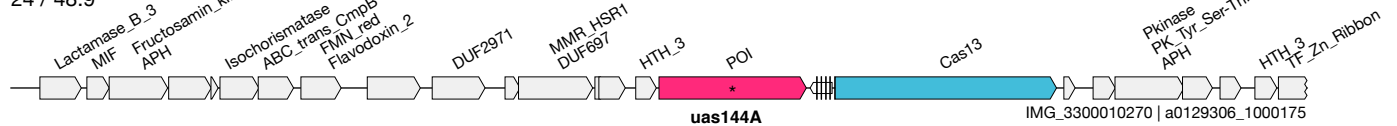**UAS-145**Auxiliary  
5 / 10.7**(transmembrane NARF)**

IMG\_3300034107&amp;&amp;0335037\_0001347&amp;&amp;11328\_12051\_-1

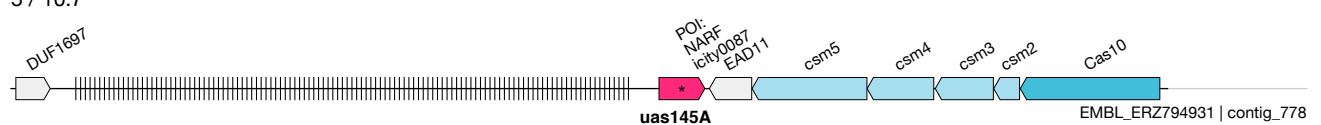**UAS-25**Auxiliary  
8 / 12.8**(NACHT\_PDEXK + cascade)**

IMG\_3300035698&amp;&amp;Ga0374944\_616918&amp;&amp;9967\_11707\_-1

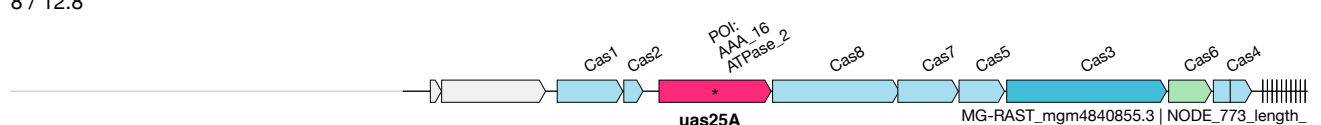**UAS-146**Auxiliary  
5 / 8.2**(EAD11)**

IMG\_3300037311&amp;&amp;0394881\_0008304&amp;&amp;11617\_12277\_-1

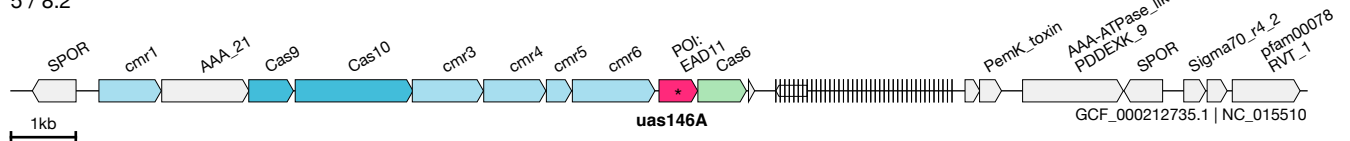

**UAS-147**  
Auxiliary  
36 / 66.5

(WYL I-D)

IMG\_3300037509&&a0394184\_0000482&&19069\_20062\_1

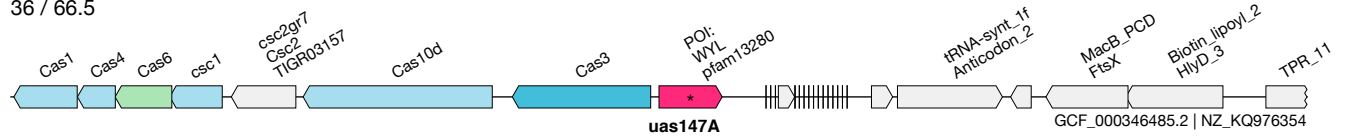

**UAS-27**  
Auxiliary  
2 / 3.2

(methyltransferase + cascade)

IMG\_3300041417&&a0439242\_0072051&&1423\_2242\_1

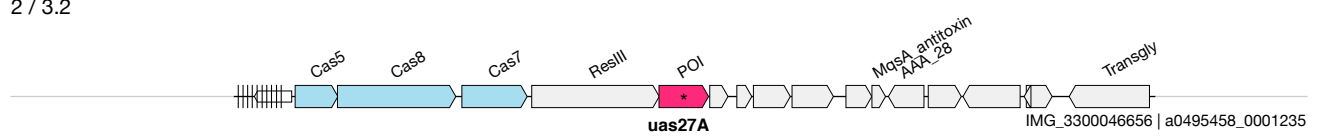

**UAS-148**  
Auxiliary  
37 / 51.3

(mega Cas8-like)

IMG\_3300042340&&a0453917\_0000106&&32810\_35291\_-1

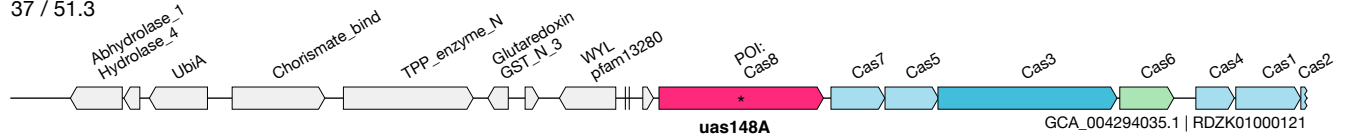

**UAS-149**  
Auxiliary  
N/A

(vWA + Tubulin)

IMG\_3300043390&&Ga0454692\_000076&&4479\_7614\_1

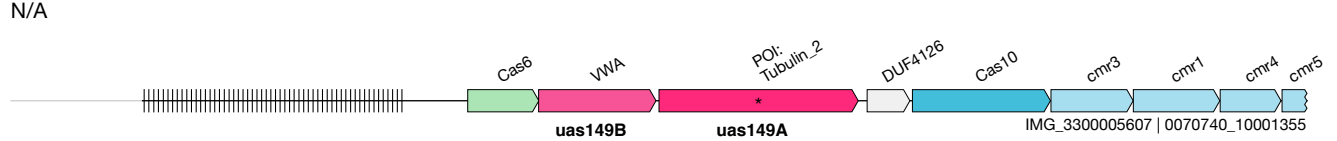

**UAS-150**  
Auxiliary  
3 / 3.0

(APH\_EckKinase)

IMG\_3300044730&&a0453757\_0004423&&6344\_8234\_-1

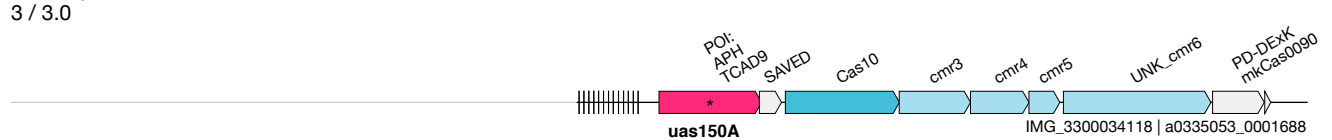

**UAS-151**  
Auxiliary  
2 / 5.0

(Cas8\_Fic fusion)

IMG\_3300045107&&a0484955\_0013512&&3038\_6074\_-1

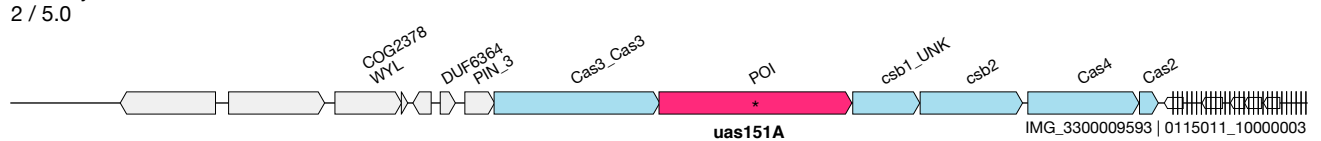

**UAS-152**  
Auxiliary  
4 / 7.4

(RNaseT)

IMG\_3300046534&&a0491194\_0030312&&2144\_2783\_-1

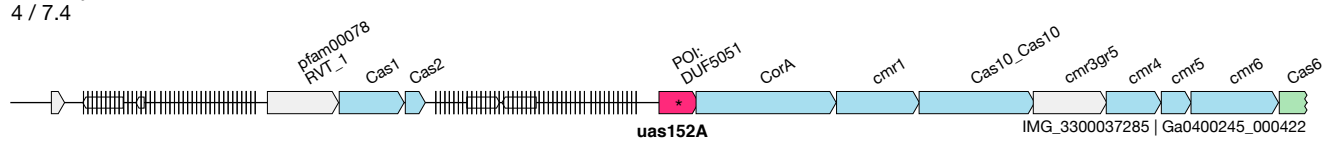

**UAS-153**  
Auxiliary  
7 / 9.9

(SNF2 instead of Cas3)

IMG\_3300047317&&a0495604\_0021803&&2293\_4057\_-1

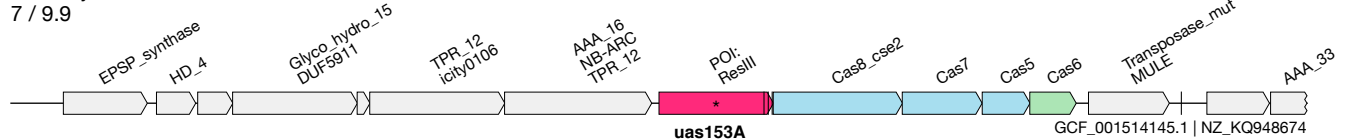

**UAS-154**  
Auxiliary  
28 / 44.9

(HIRAN Cas9, one case ATPase)

IMG\_3300048583&&a0498911\_0096679&&1007\_1916\_1

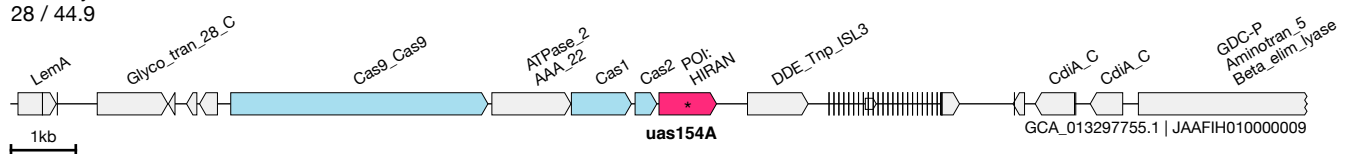

**UAS-20**  
Auxiliary  
7 / 7.4

(Cas12 + bzip)  
IMG\_3300048589&&a0498927\_0037426&&1005\_1464\_1

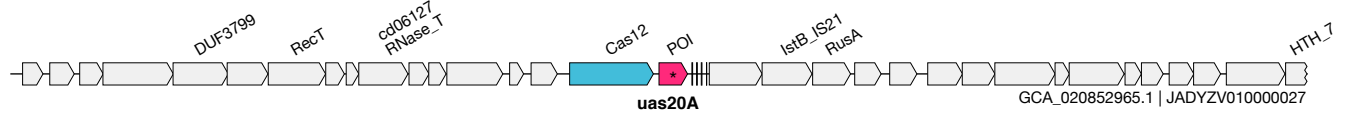

**UAS-155**  
Auxiliary  
3 / 4.4

(transmembrane\_vWA + DUF4407)  
IMG\_3300048987&&a0467049\_0000162&&19133\_19934\_1

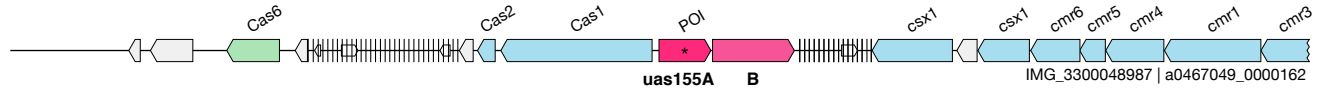

**UAS-156**  
Auxiliary  
N/A

(Mrr nuclease + ATPase)  
WGS\_CADHRT01&&CADHRT010000022&&25862\_26885\_1

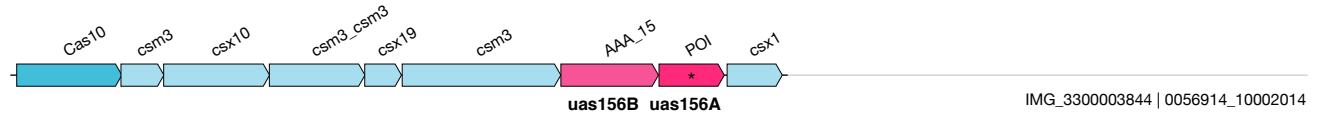

**UAS-33**  
Auxiliary  
34 / 50.0

(Prok\_E2 + ThiF + ThiS + NYN + CorA)  
WGS\_JAAUYB01&&JAAUYB010070855&&3244\_3730\_1

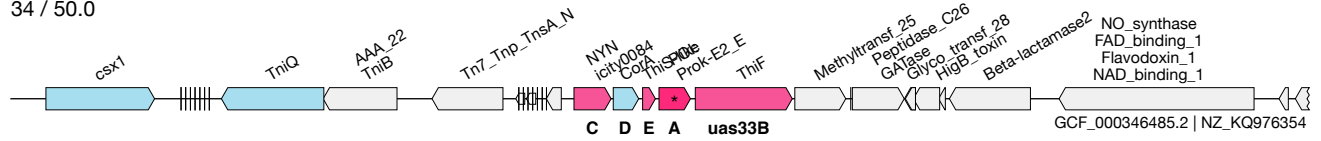

**UAS-157**  
Auxiliary  
19 / 25.4

(RecJ\_HD)  
WGS\_MTBK01&&MTBK01177382&&2891\_4688\_1

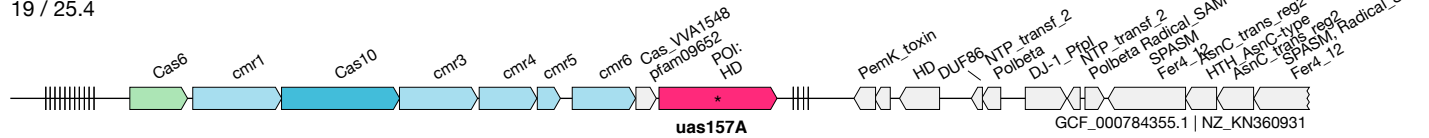

1kb



**UAS-34**Toxin-Antitoxin  
15 / 22.9**(DarT DarG toxin-antitoxin ribosylation)**  
EMBL\_ERZ1033877&&contig\_98&&37922\_38591\_-1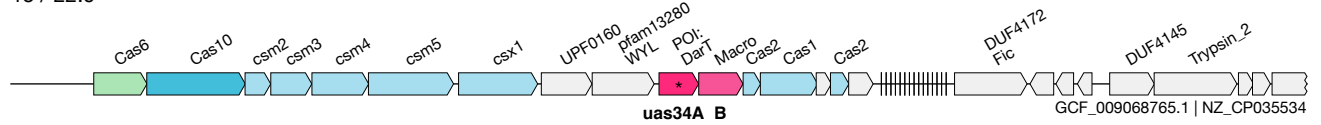**UAS-35**Toxin-Antitoxin  
9 / 9.0**(addiction gene orf associated with Cas9)**  
EMBL\_ERZ1505400&&contig\_18950&&117\_258\_1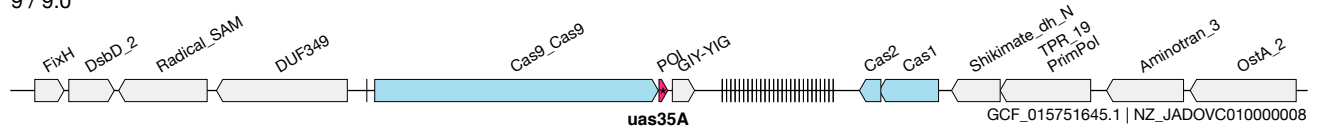**UAS-158**Toxin-Antitoxin  
8 / 18.7**(AbiE + DUF87)**  
EMBL\_ERZ1742239&&contig\_29570&&162\_1638\_1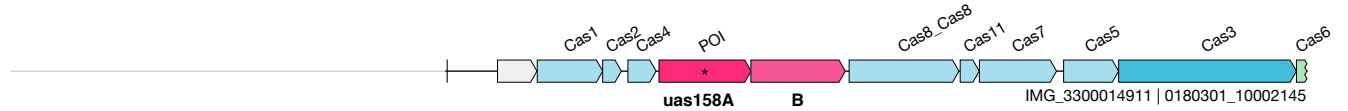**UAS-159**Toxin-Antitoxin  
18 / 48.1**(Nucleotidyltransferase HEPN, antitoxin)**  
EMBL\_ERZ511474&&contig\_784&&79398\_79716\_-1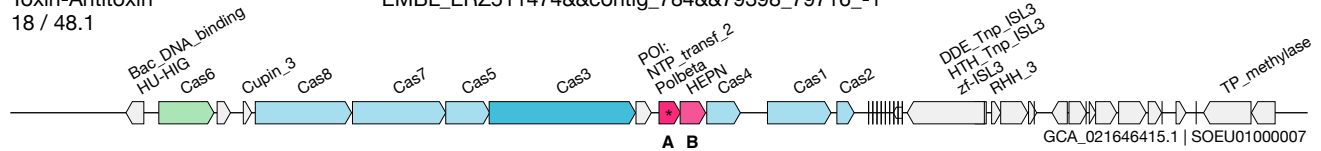**UAS-160**Toxin-Antitoxin  
104 / 173.3**(DUF86 + Nucleotidyltransferase)**  
GCA\_01328545.1&&JAAXLU010000071&&33674\_34109\_-1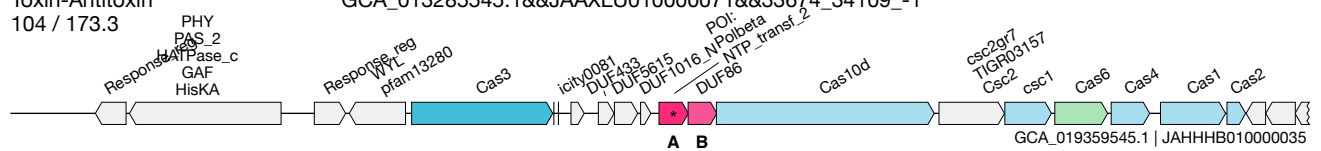**UAS-161**Toxin-Antitoxin  
3 / 3.0**(Cas9 HicAB TA)**  
GCF\_003337175.1&&NZ\_NETH01000035&&6357\_6546\_1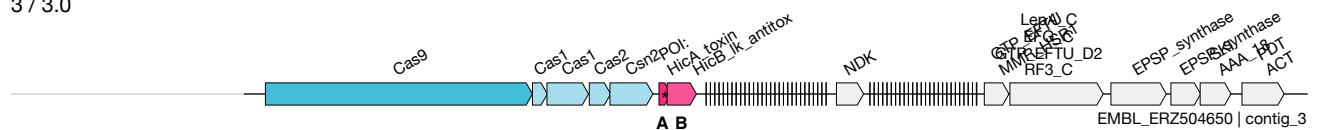**UAS-162**Toxin-Antitoxin  
25 / 36.4**(Cas9 TA system)**  
GCF\_012037625.1&&NZ\_JAAVJS010000002&&280535\_280832\_-1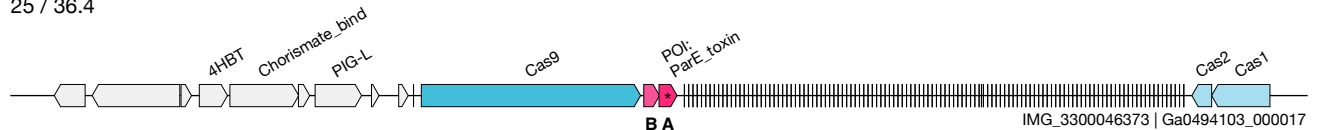**UAS-163**Toxin-Antitoxin  
4 / 6.9**(nucleotidyltransferase + HTH)**  
IMG\_3300001380&&6J14229\_10033242&&787\_1210\_1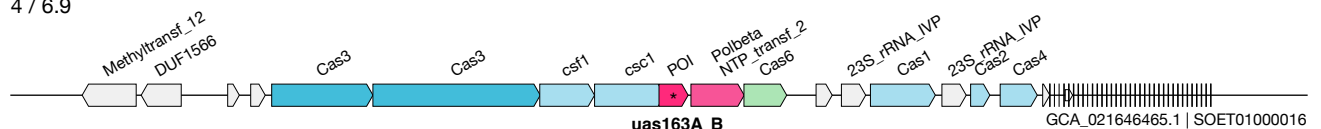**UAS-164**Toxin-Antitoxin  
2 / 5.2**(AbiEii)**  
IMG\_3300005452&&a0068706\_1004208&&1242\_2085\_1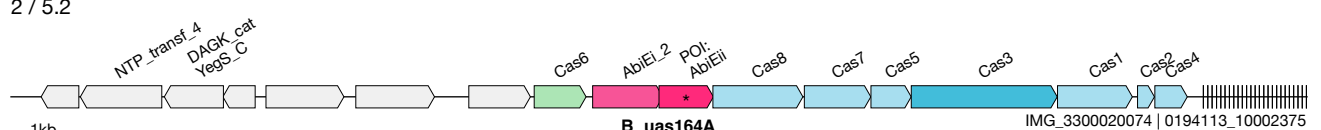

1kb

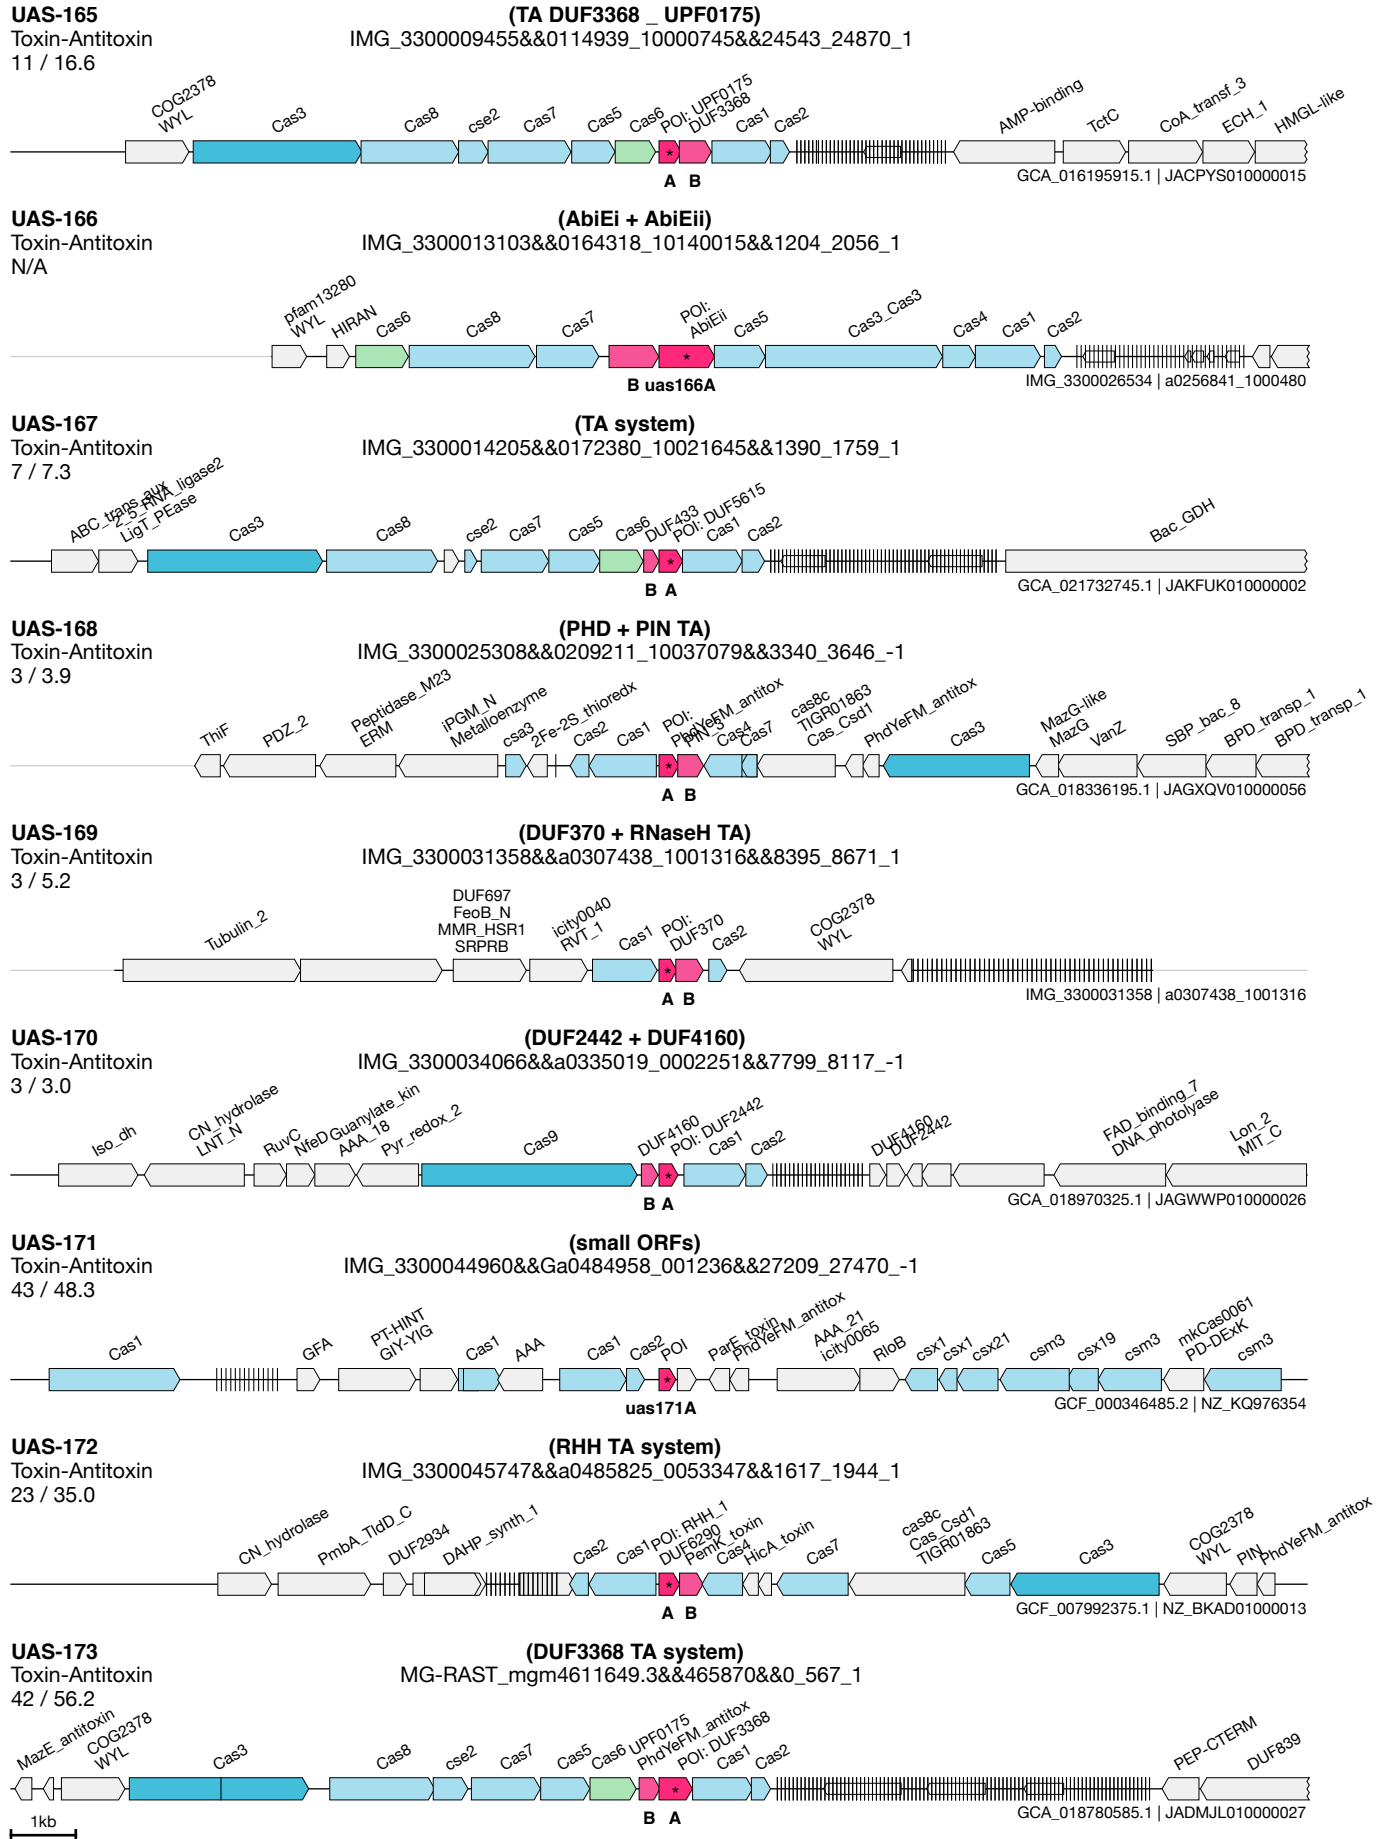

**M2**  
Giant  
3 / 3.0

**(massive defense genes)**  
EMBL\_MGYG000003147&&MGYG000003147\_7&&47692\_56296\_-1

POI:  
Lipase\_GDSL\_2  
NPCBM  
BNR\_2  
Sialidase  
Flg\_new  
Btg\_2  
fn3  
Laminin\_G\_3

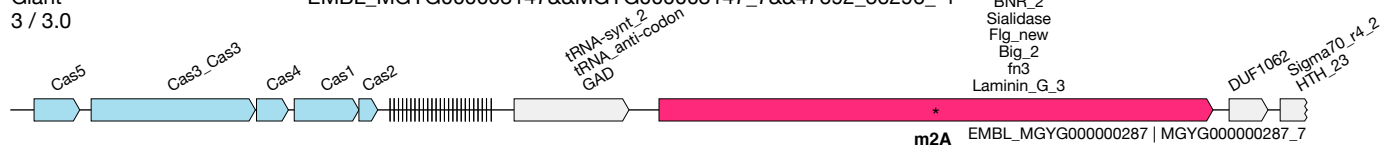

**M1**  
Giant  
6 / 13.3

**(massive defense system)**  
WGS\_BOFR01&&BOFR01000007&&165916\_179089\_-1

POI:  
LPD39  
Eco57I  
Helicase\_C

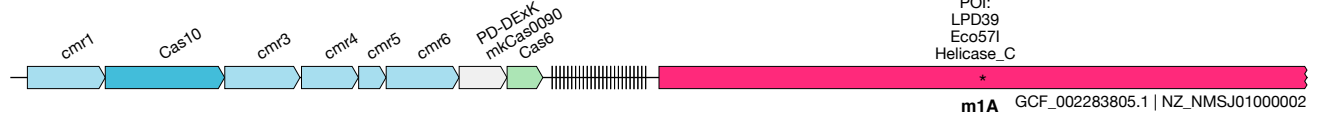

1kb

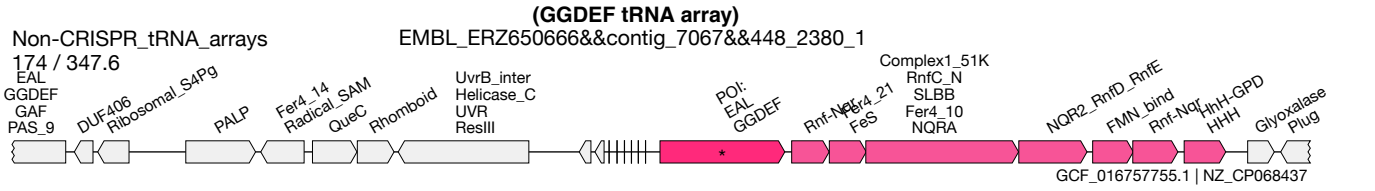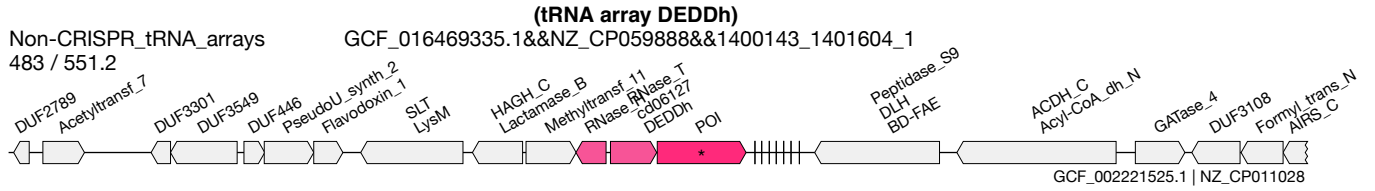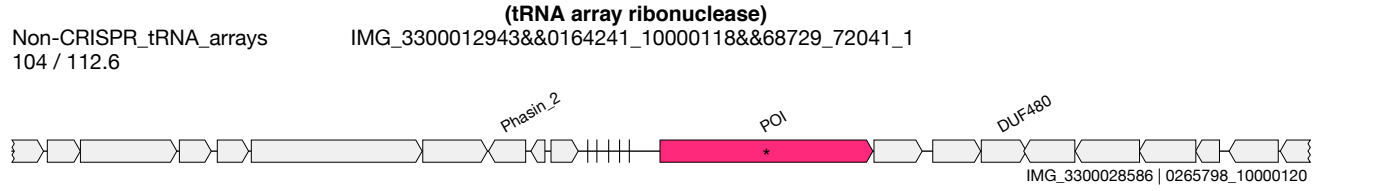

1kb

**(DUF3800 standalone)**  
 Non-CRISPR\_hypervariable\_repeat EMBL\_ERZ795038&&contig\_16642&&892\_1681\_1  
 12 / 12.0

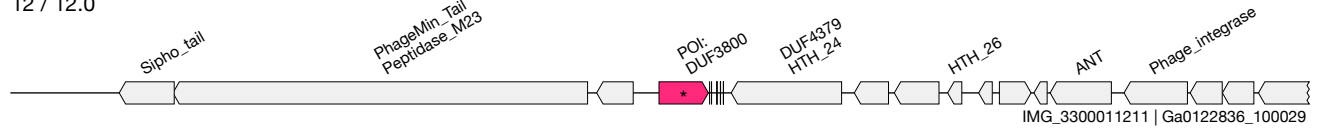

**(PDDEXK + Metallophosphatase)**  
 Non-CRISPR\_hypervariable\_repeat EMBL\_ERZ825177&&contig\_7965&&5053\_8428\_1  
 44 / 47.4

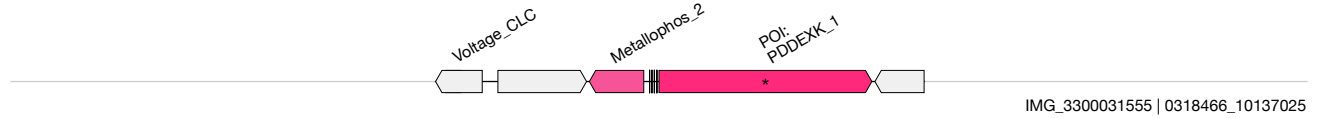

**(PDDEXK\_ATPase)**  
 Non-CRISPR\_hypervariable\_repeat EMBL\_ERZ842383&&contig\_35002&&108\_1647\_-1  
 37 / 39.4

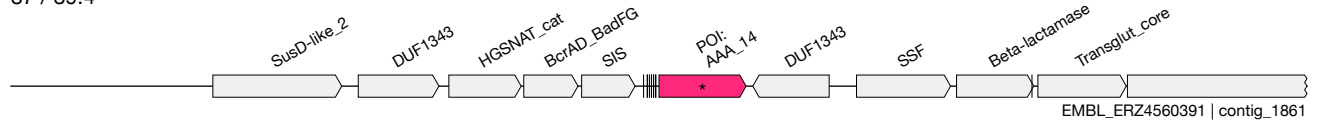

**(PLMP\_corA-like)**  
 Non-CRISPR\_hypervariable\_repeat GCA\_014804555.1&&JAAUZO010000014&&4635\_6039\_-1  
 37 / 48.3

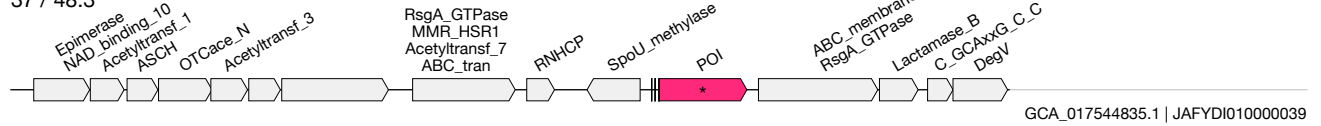

**(DUF222\_HNH)**  
 Non-CRISPR\_hypervariable\_repeat GCF\_000442645.1&&NC\_021915&&2150743\_2152009\_1  
 51 / 111.4

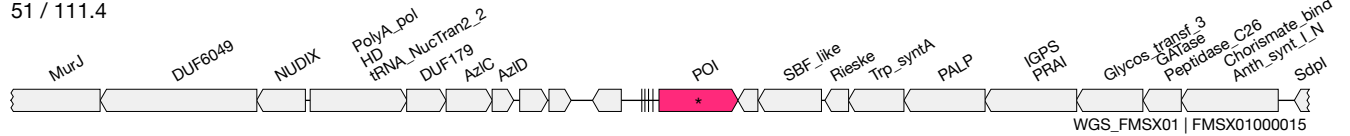

**(GGDEF + MFS + Phospholipase)**  
 Non-CRISPR\_hypervariable\_repeat GCF\_002262875.1&&NZ\_NKYE01000003&&91808\_93059\_-1  
 25 / 35.5

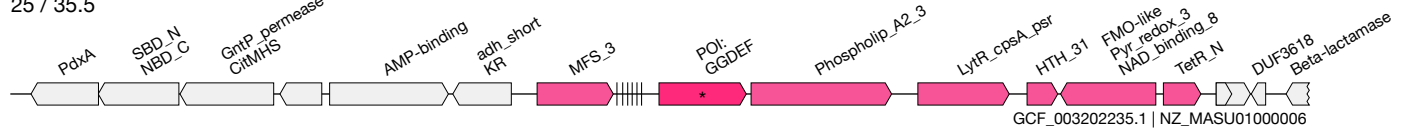

1kb

## Fig. S14. Limited loci of all systems identified in this study

Example loci (up to one page) of each identified system (ranked by length to contig edge of the characteristic gene corresponding to the cluster id). Associated genes are not explicitly shown but can be found in **Data S2-3** and have visualizations for a representative locus available in Fig. S13. In contrast to Fig. S13, only the characteristic gene from the cluster id is shown in red (other known associated genes are not demarcated). The cluster id below the characteristic domains associated with the system (top middle bold for each system) is shown with regular font and corresponds to the gene with the asterisk. Signature effector genes are colored in darker blue (Cas6, Cas9, Cas10, Cas12, Cas13). Other Cas genes are shown as light blue. Cas6 is shown as light green. Unrelated or other genes are shown as light grey. White genes with shorter height are genes that overlap with CRISPR arrays (vertical black lines). Above each gene are redundancy reduced predictions of the protein domains via HMMER on the PFAM database using a minimum bit score threshold of 18. Enhanced CRISPR association scores for the cluster ids are shown as applicable: some systems were included if they were identified through protein-protein associations, or exceptionally low association score (in the case of PhageCas9), even if their enhanced CRISPR-association score did not meet the filtering threshold, in which case the CRISPR association-scores are not shown.

Note: Fig. S14 spans pages **87 to 283**

### Sub table of contents

|                                              |     |
|----------------------------------------------|-----|
| Effector Modules                             | 87  |
| Cas Fusions                                  | 100 |
| Acquisition                                  | 107 |
| CARF                                         | 132 |
| Auxiliary                                    | 151 |
| Toxin-Antitoxin                              | 255 |
| Massive Genes                                | 273 |
| Non-CRISPR tRNA arrays                       | 275 |
| Non-CRISPR arrays with hypervariable spacers | 278 |

A

III-UAS  
Effector-Modules

(new III subtype)  
EMBL\_ERZ584659&&contig\_33476&&1228\_2278\_-1

6 / 7.0

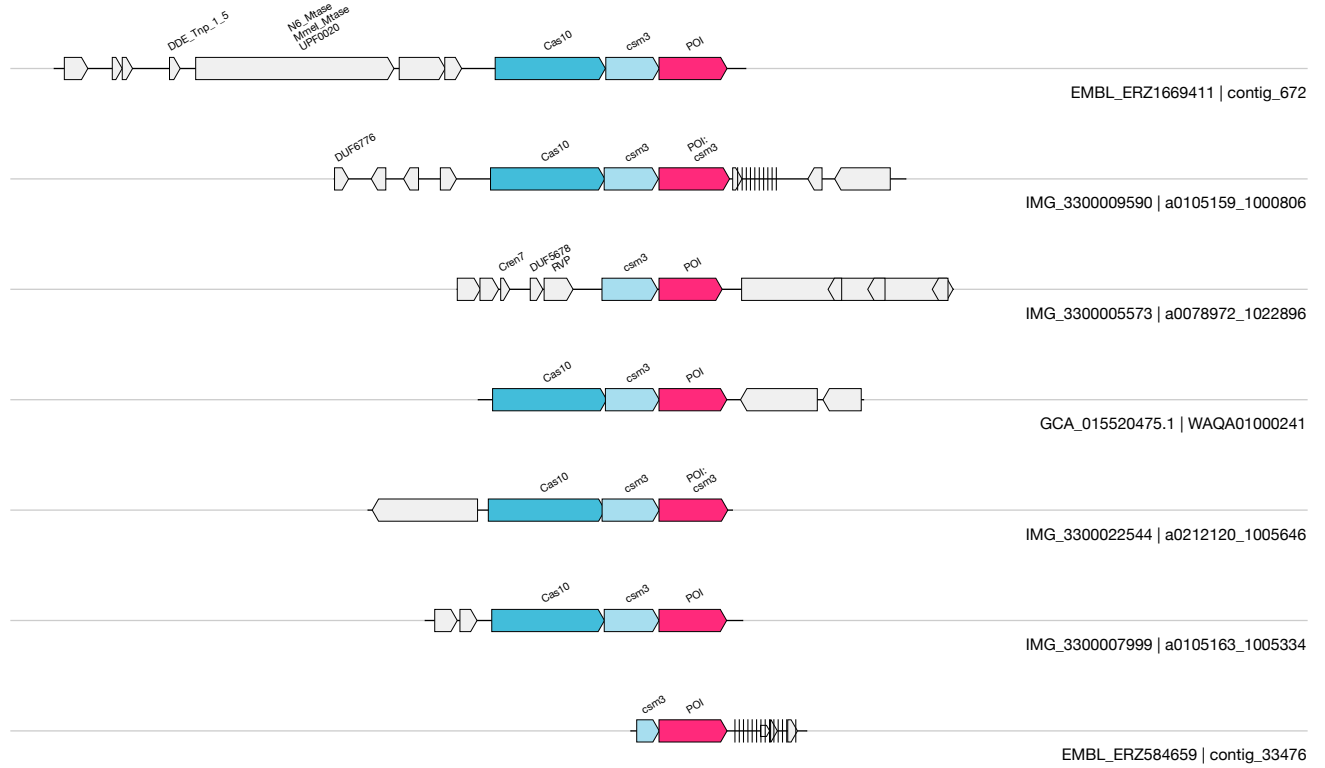

1kb

B

**PhageCas9**  
Effector-Modules

**(PhageCas9 + Helicase)**  
EMBL\_ERZ795075&&contig\_381&&19666\_22555\_1

N/A

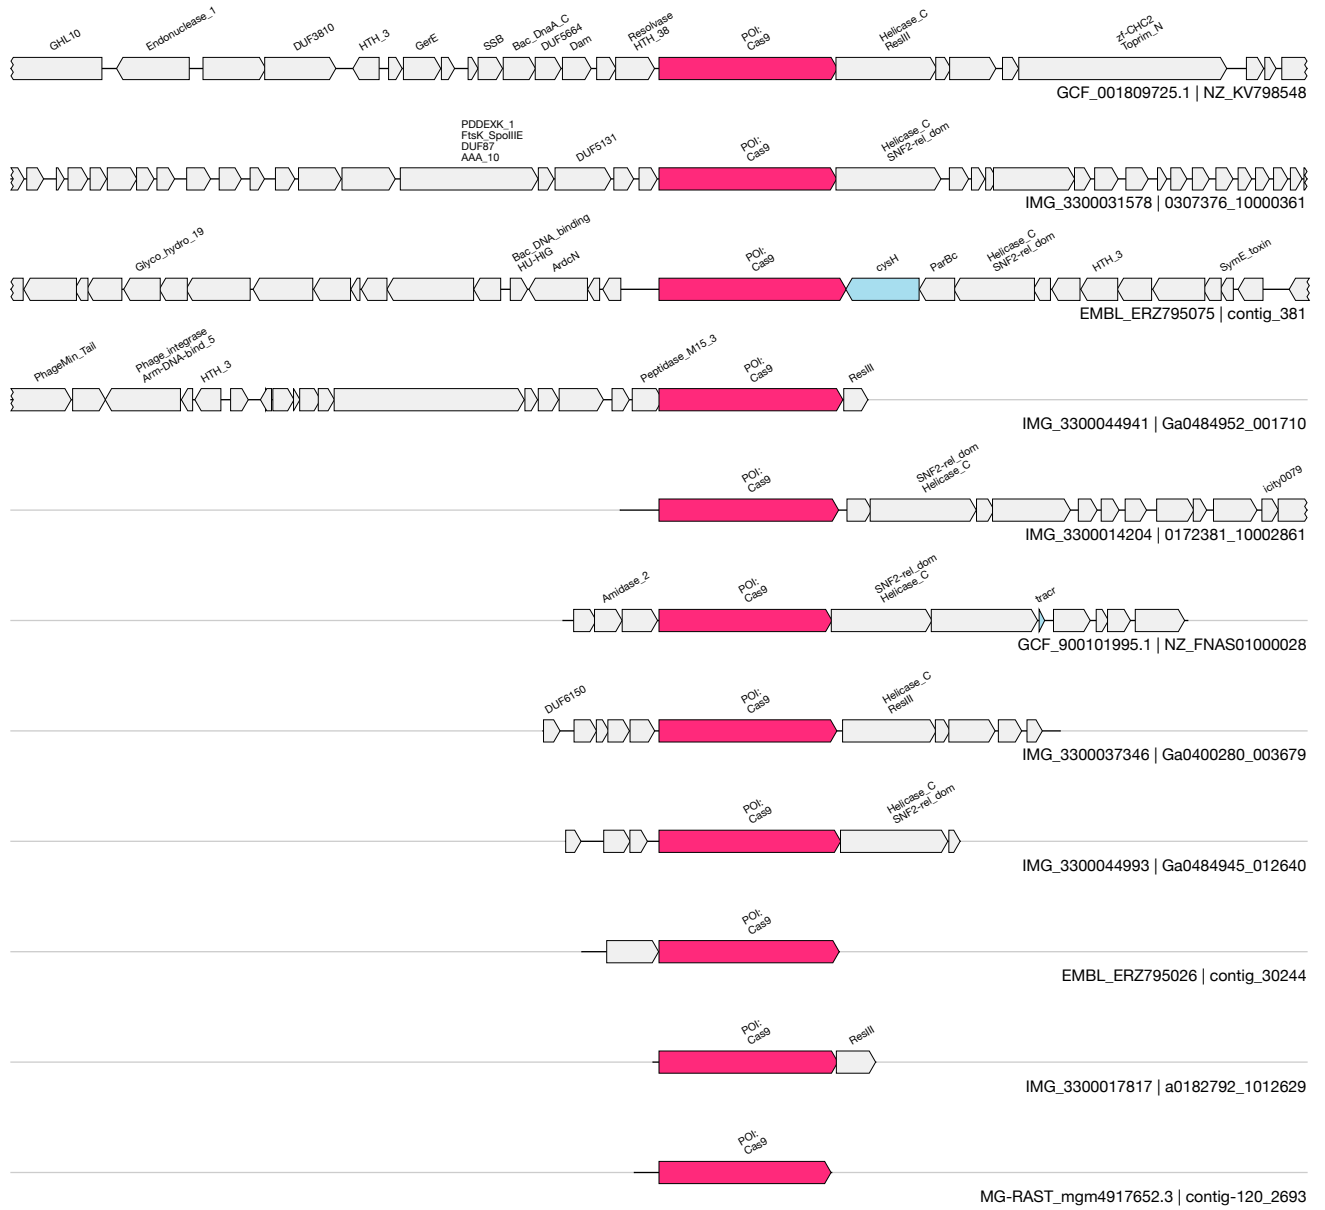

1kb



C

**CasMu-I**  
Effector-Modules

**(CasMu-I)**  
GCA\_004138175.2&&RYFE02000070&&3219\_4437\_1

20 / 46.0

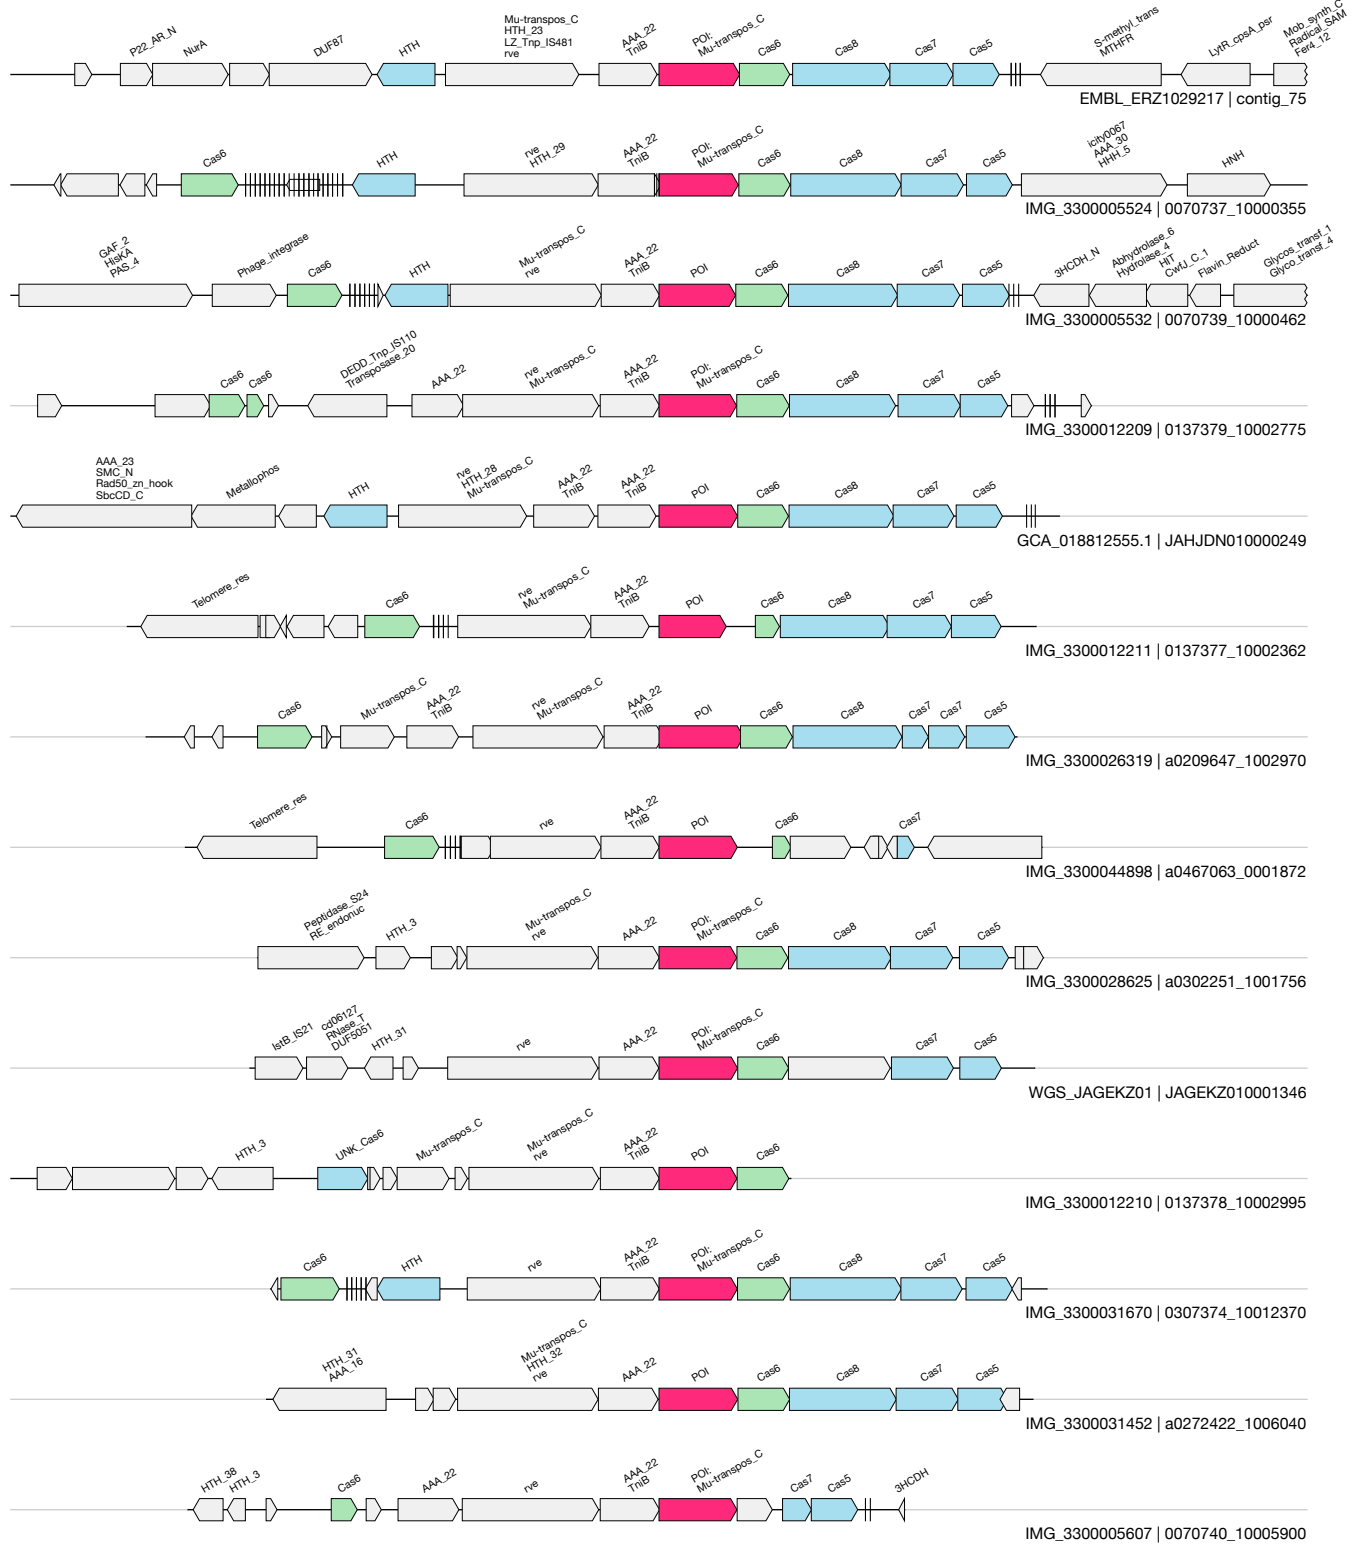

1kb

D

**Cas12\_DUF3800\_TPR\_UvrD\_TPR** (DUF3800\_TPR + Cas12)  
Effector-Modules GCA\_018268035.1&&JAFDXI010000155&&1871\_5534\_-1

11 / 12.0

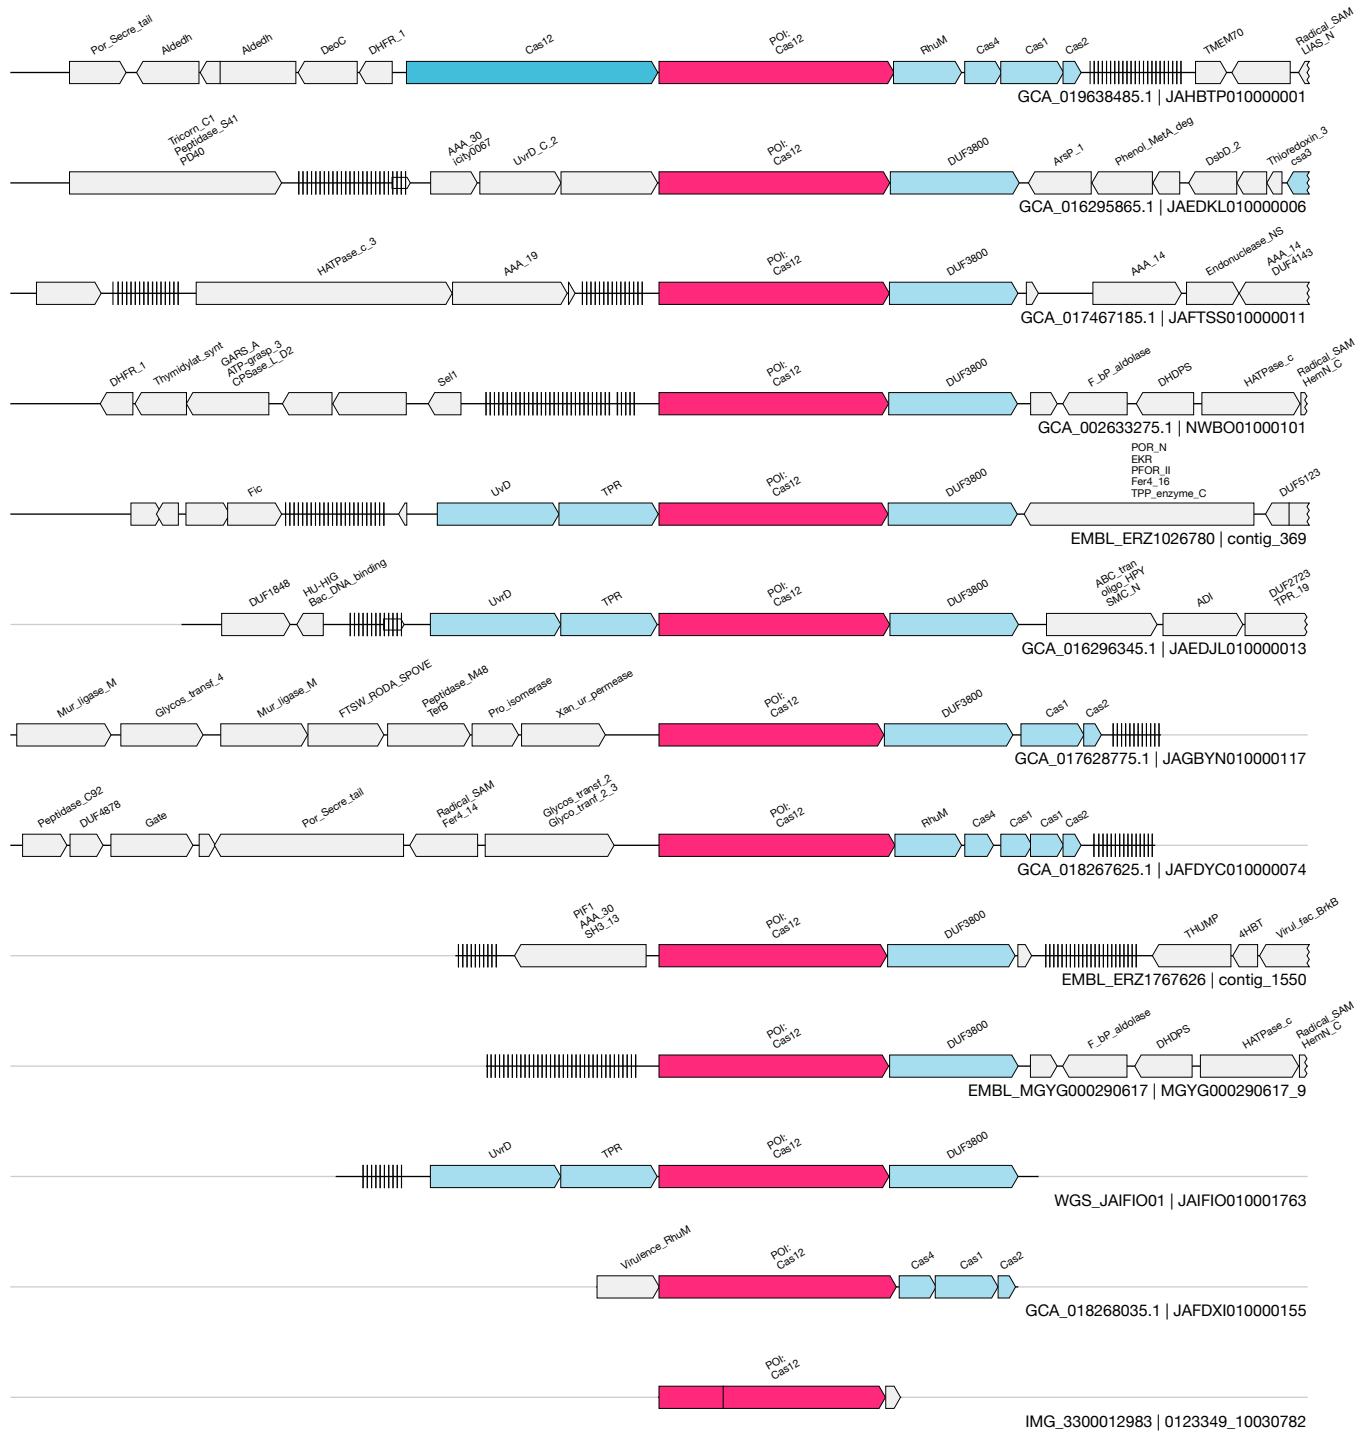

1kb

E

**UAS-36**  
Effector-Modules

**(Cas3\_PDDEXK)**

3 / 3.0

GCA\_018369695.1&&JAGZBW010000011&&6634\_10387\_-1

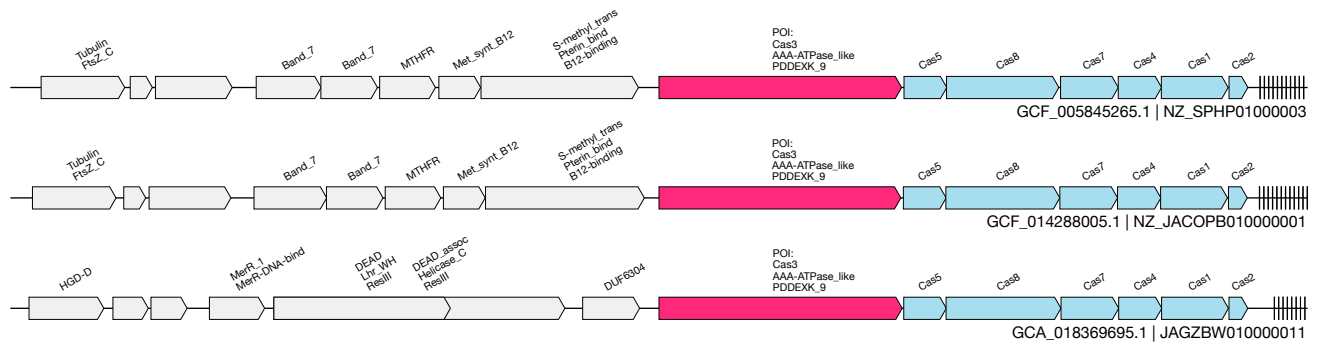

1kb

F

**Cas11-VRR**  
Effector-Modules

**(Cse2\_VRR)**  
IMG\_3300006527&&Ga0100159\_100137&&71478\_72558\_1

7 / 7.2

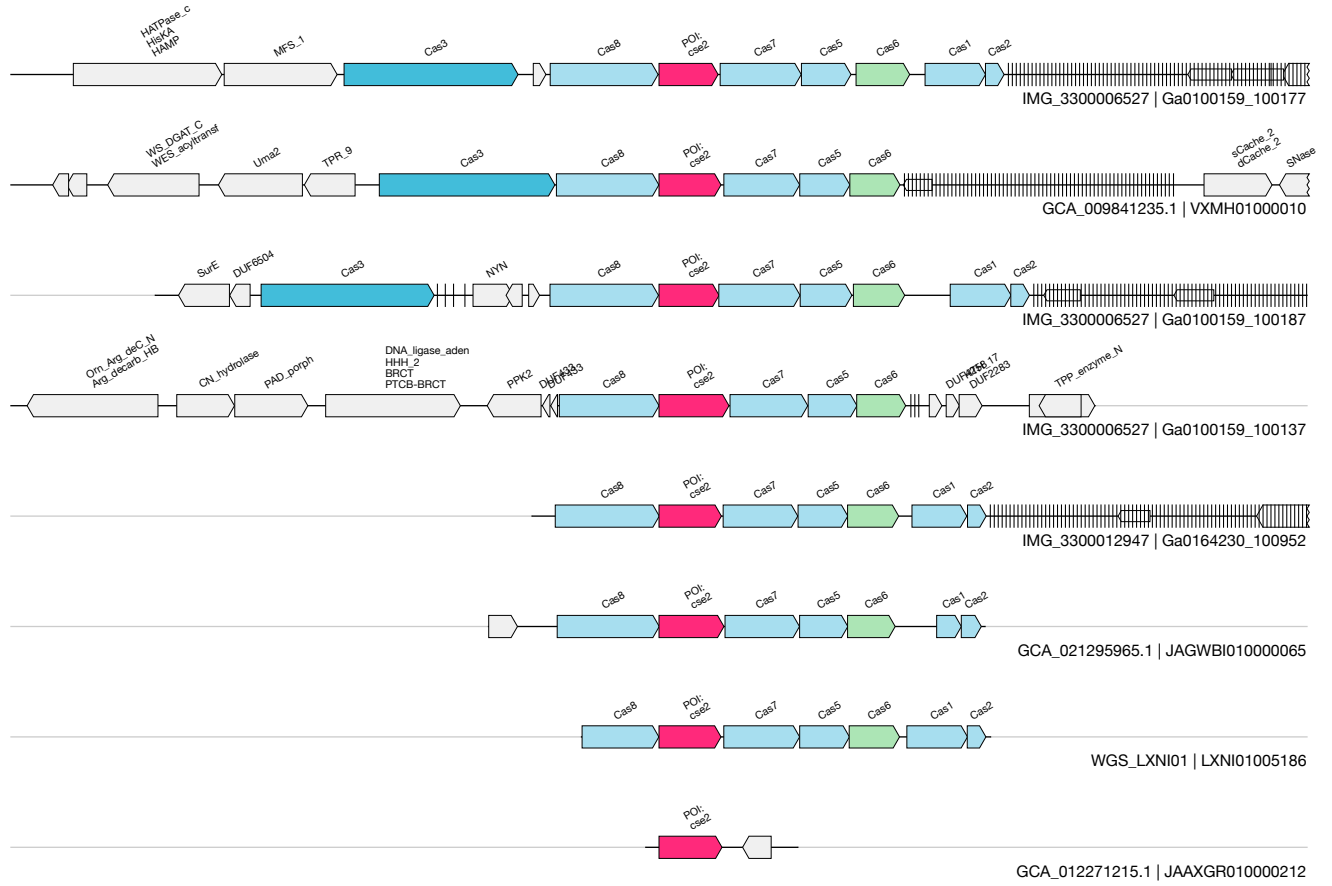

G

VII  
Effector-Modules

(VII b-CASP)  
IMG\_3300009712&&a0116165\_1003158&&2597\_4427\_-1

10 / 16.3

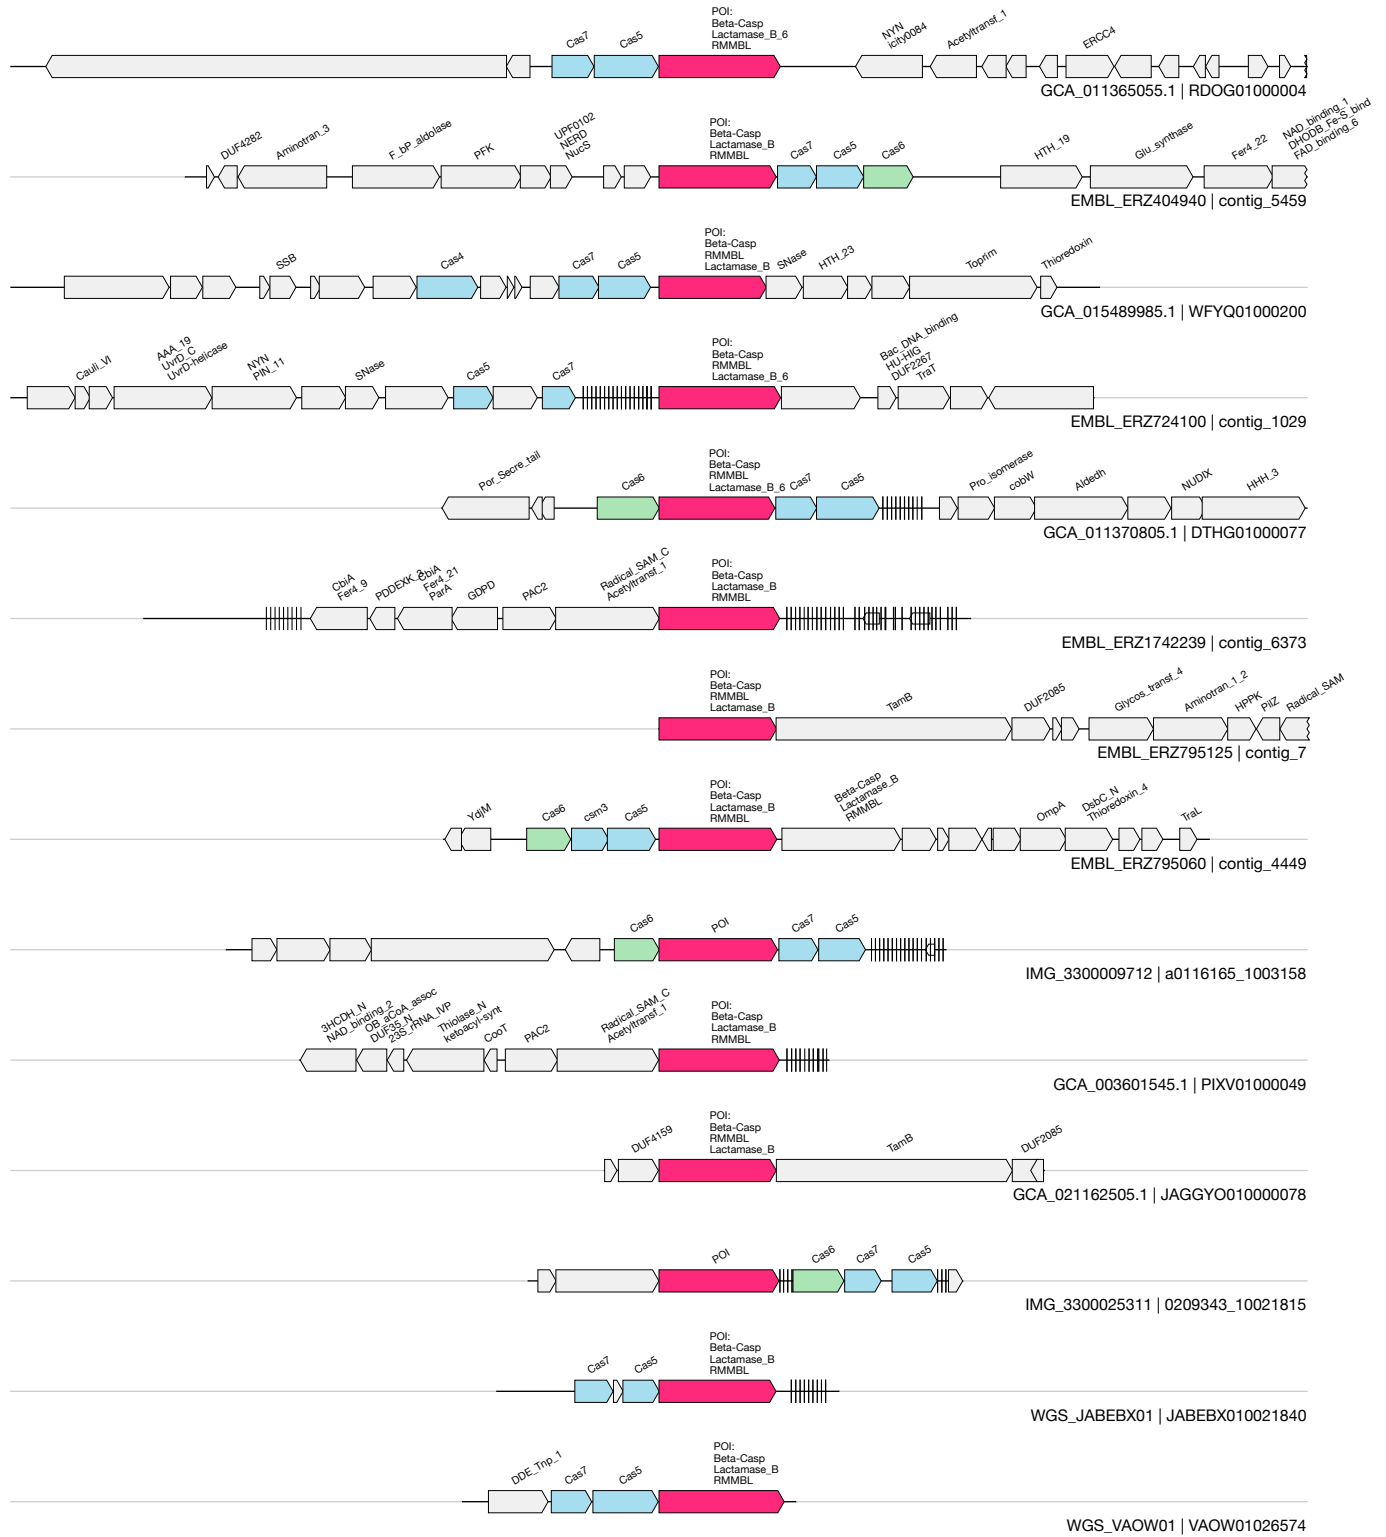

1kb

H

Cas5-HNH  
Effector-Modules

(Cas5\_HNH)

161 / 243.7

IMG\_3300010327&&0116246\_10008300&&2259\_3435\_-1

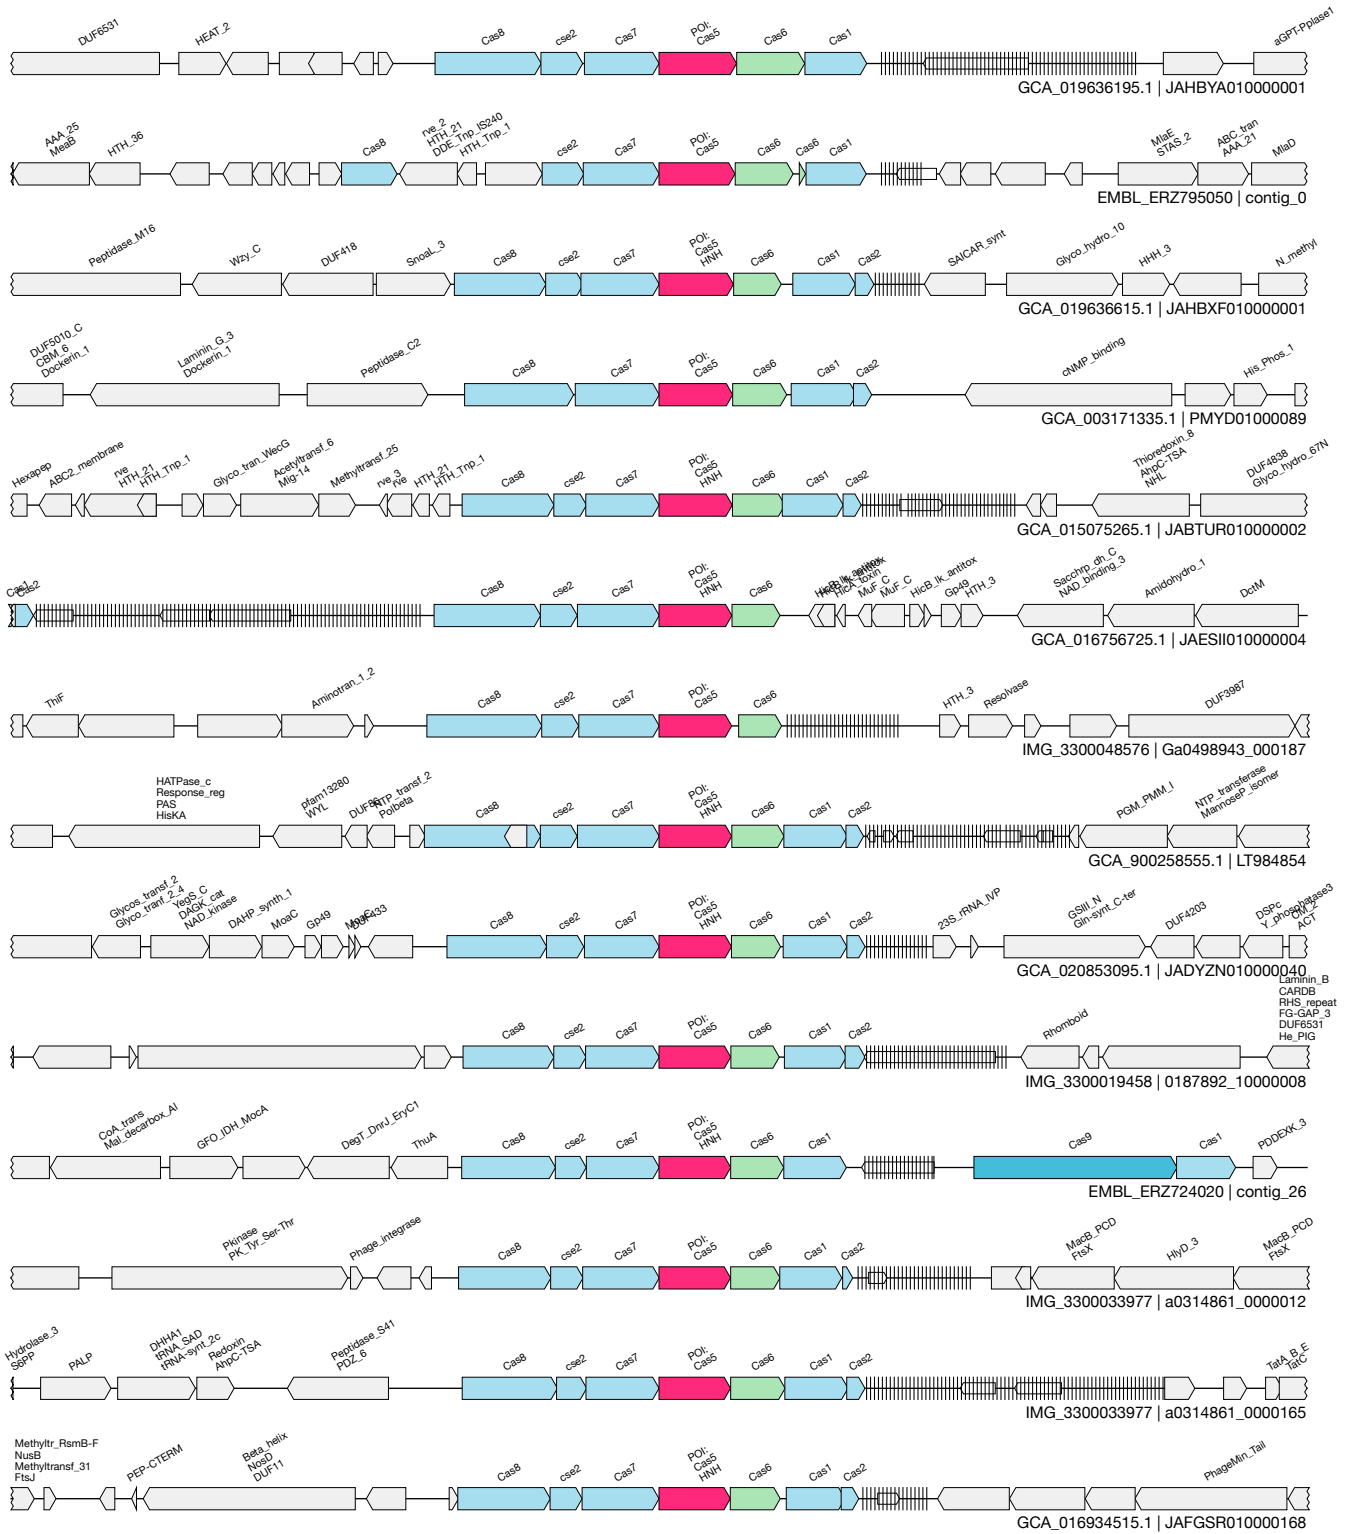

1kb

I

**CasMu-V**  
Effector-Modules

**(CasMuV MuB)**

2 / 4.0

IMG\_3300010349&&0116240\_10096391&&801\_1509\_-1

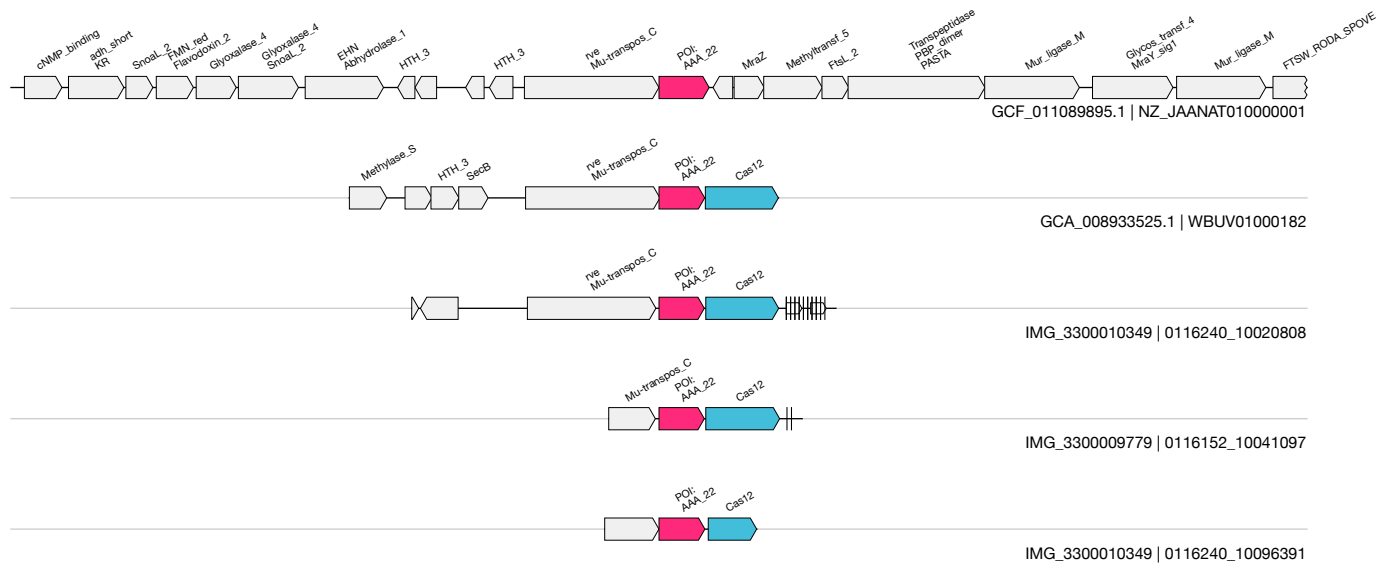

1kb

J

**Cas12-Cas3**  
Effector-Modules

**(Cas12 + Cas3)**  
IMG\_3300020641&&Ga0206884\_1077&&6347\_8576\_1

7 / 8.0

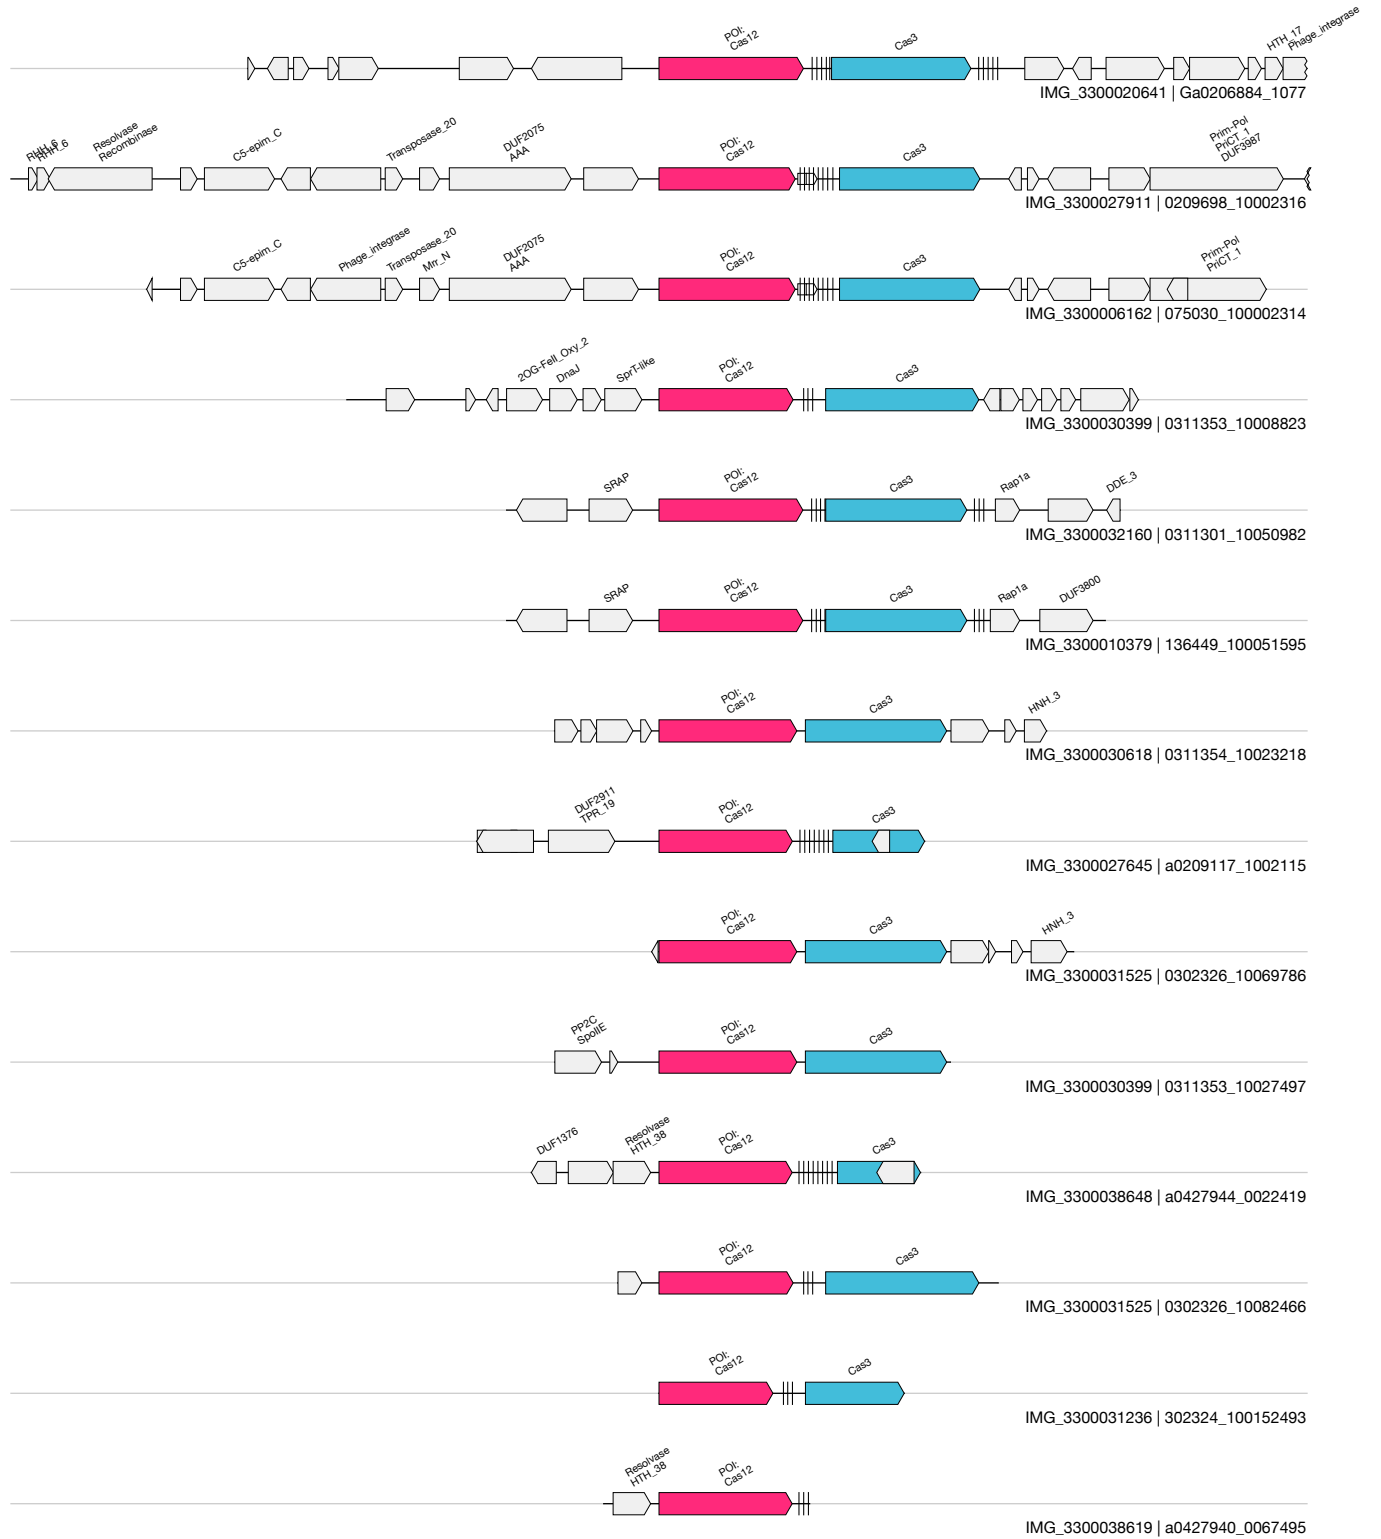

1kb



K

**Cas12-IscB**  
Effector-Modules

**(Cas12 + IscB + HTH)**  
IMG\_3300027823&&0209490\_10014851&&1048\_2638\_1

4 / 9.5

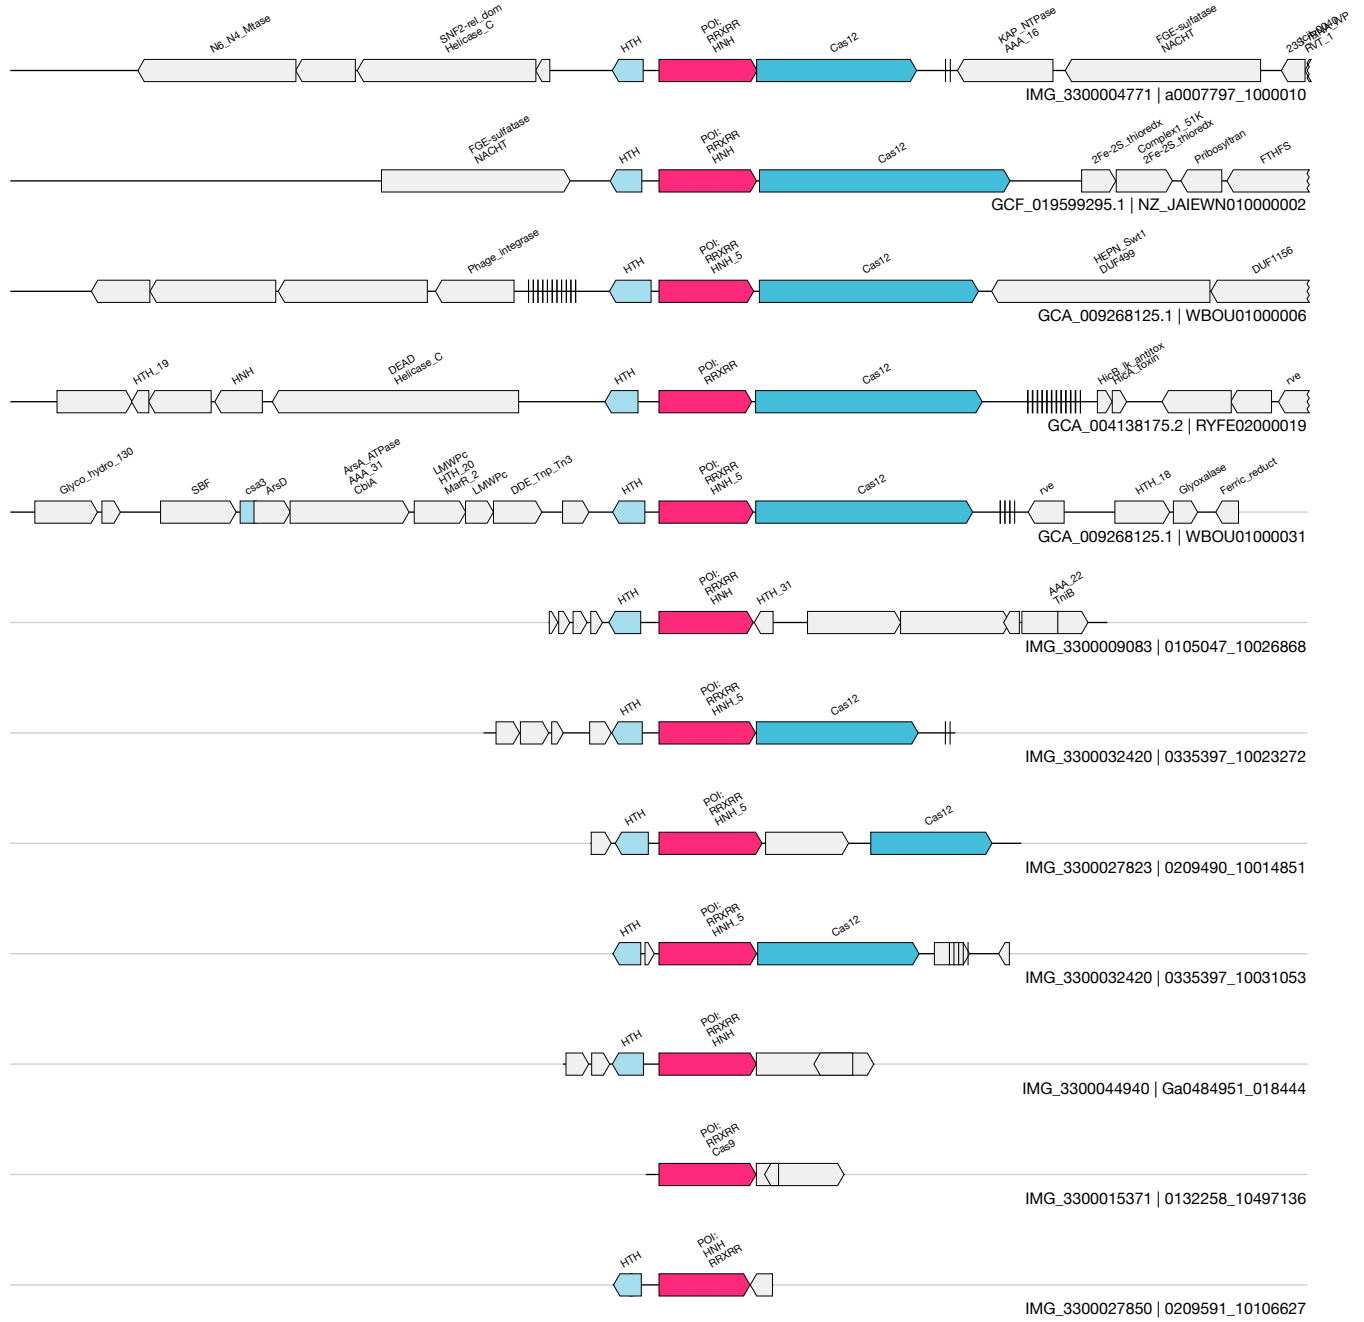

1kb

L

**Cas8-HNH**  
Effector-Modules

**(Cas8\_HNH)**

5 / 8.0

IMG\_3300031760&&0326513\_10063483&&752\_1769\_-1

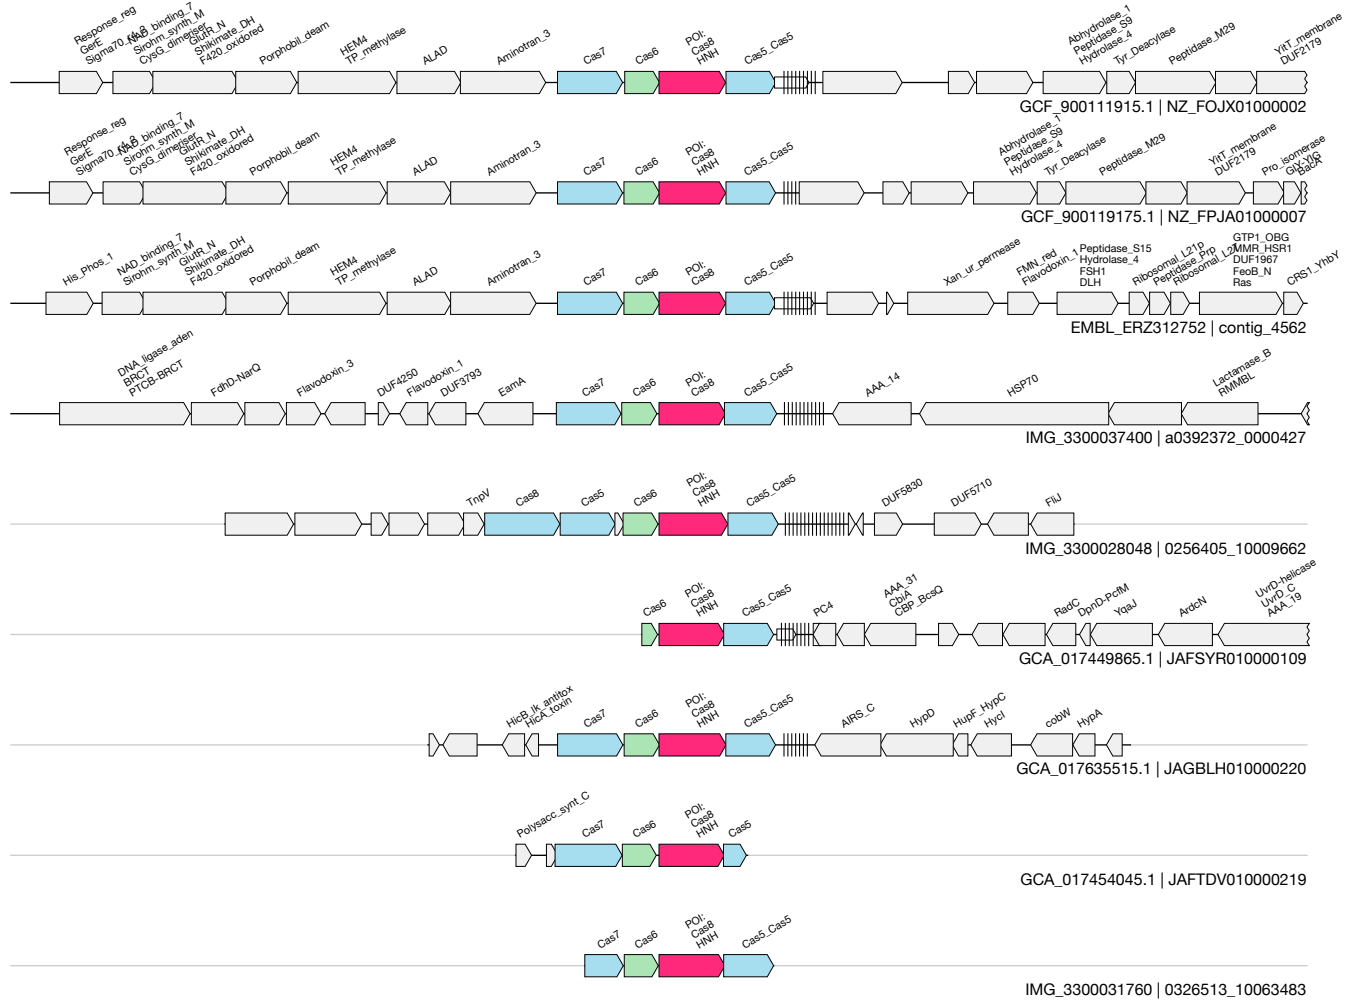

1kb

M

**DinG-HNH**  
Effector-Modules

**(DinG\_HNH)**

111 / 129.0

IMG\_3300044617&&a0453743\_0023453&&2386\_4123\_-1

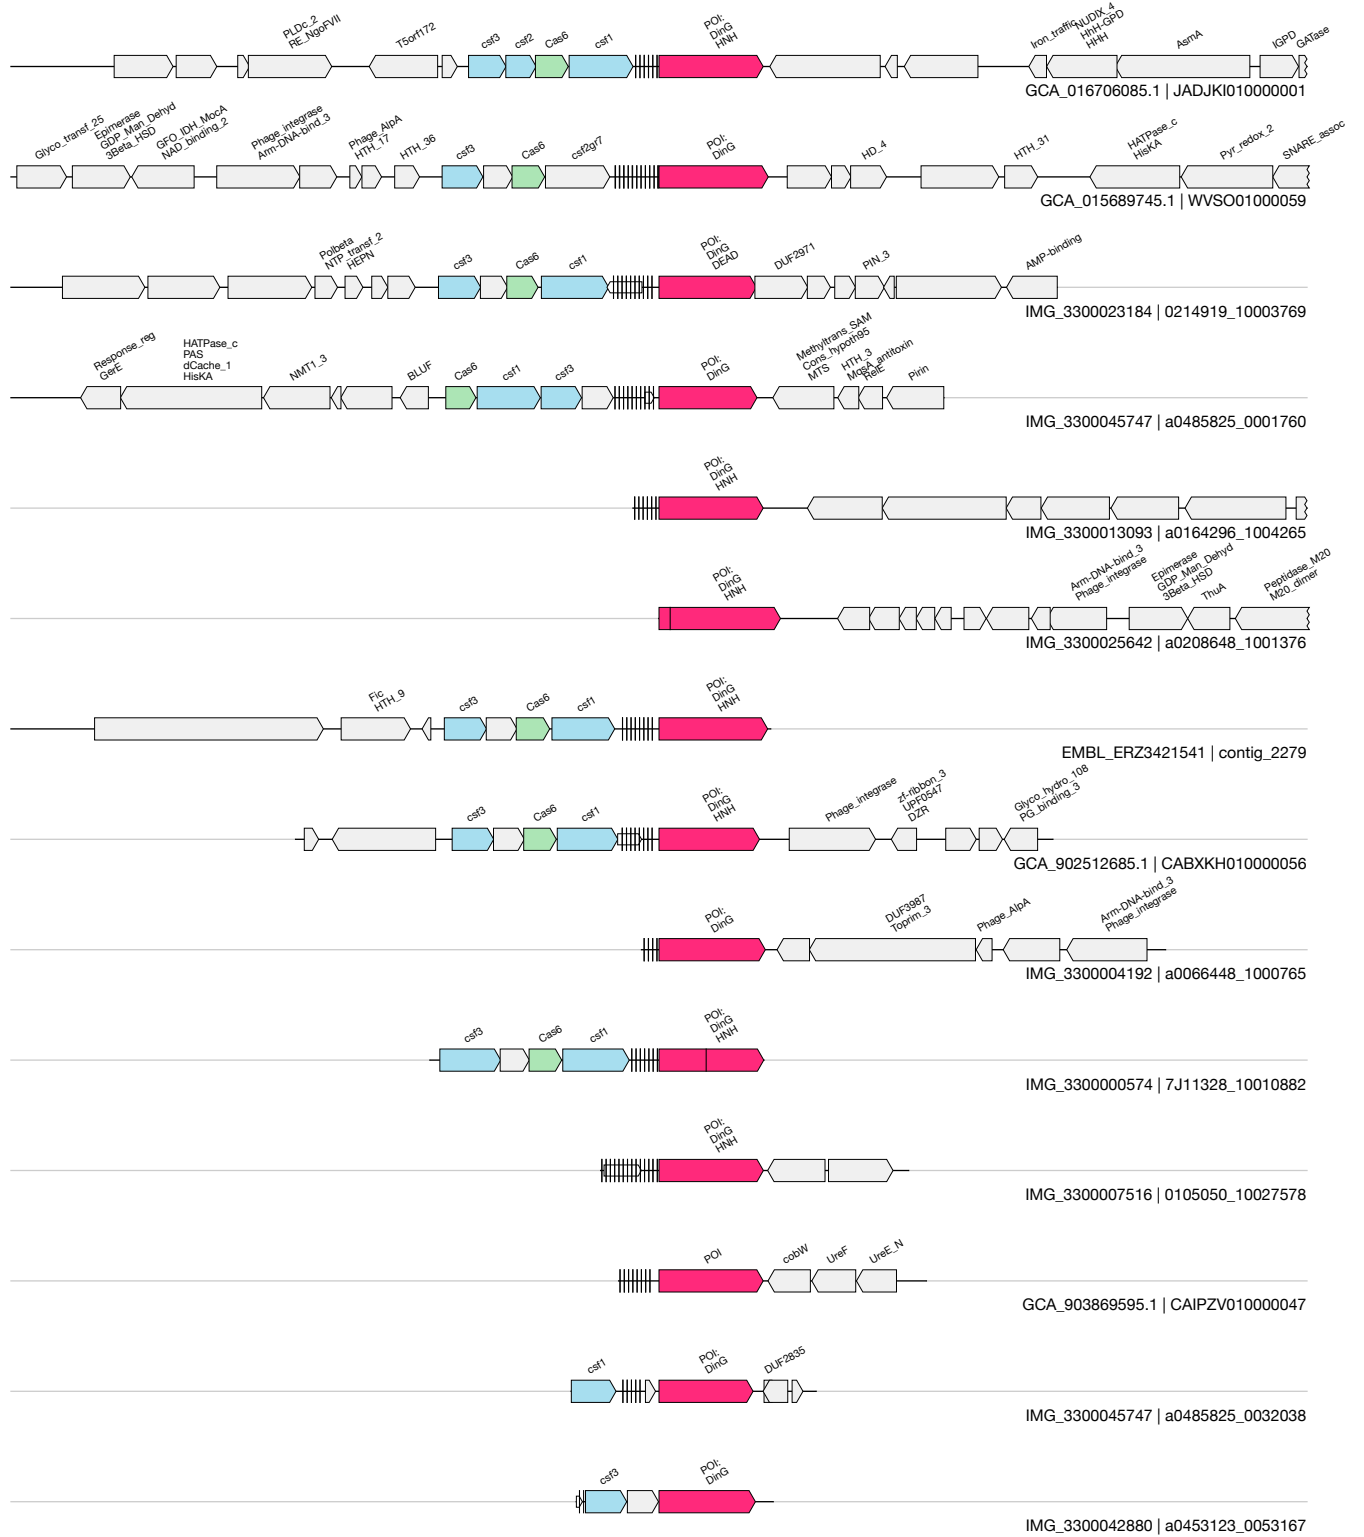

1kb

N

**Cas8-Cas5**  
Cas-Fusions

**(Cas7 + Cas8\_Cas5 fusion)**  
EMBL\_ERZ505329&&contig\_129&&28461\_30633\_-1

3 / 4.7

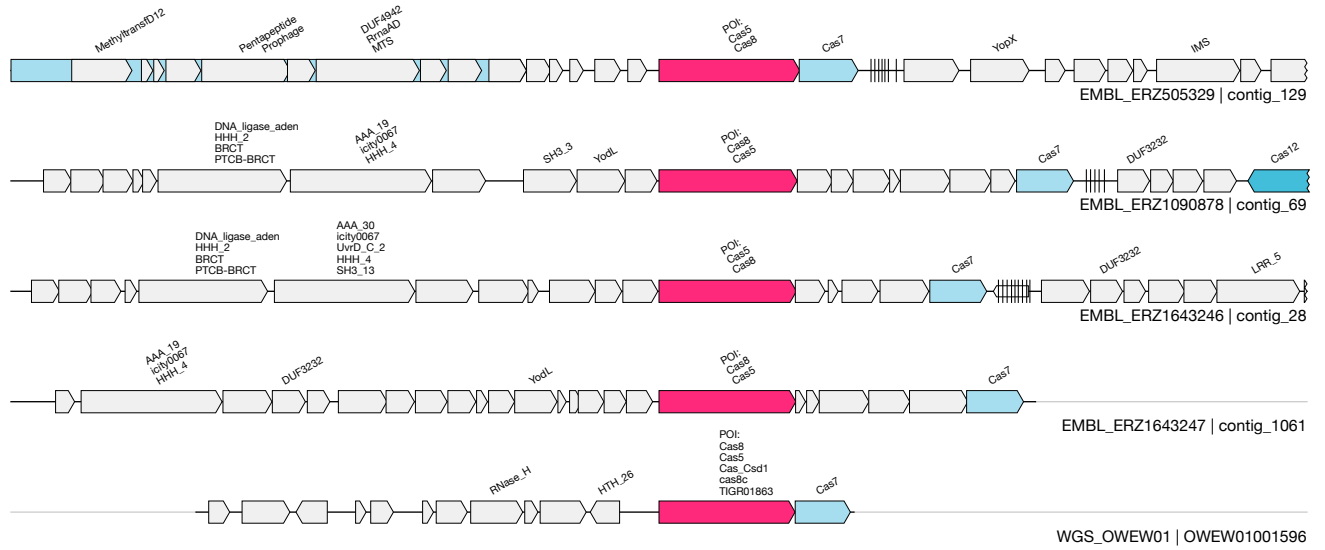

1kb

O

**UAS-37**  
Cas-Fusions

**(Cas9\_Cas1 fusion)**  
GCA\_904380115.1&&CAJFHU010000034&&10263\_14391\_-1

3 / 3.0

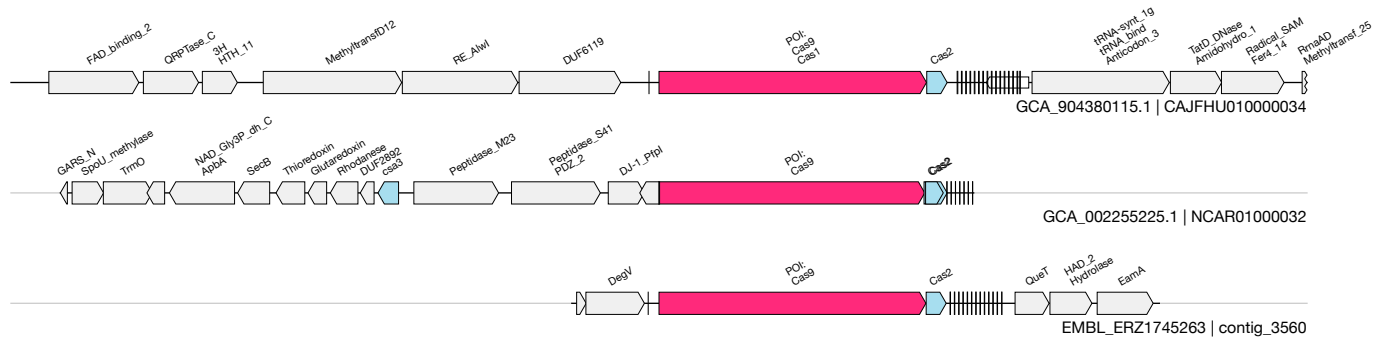

1kb

P

**Cas5-Cas3**  
Cas-Fusions

**(Cas5\_Cas3 fusion)**

27 / 27.7

GCF\_000058485.1&&NC\_008278&&6031418\_6034760\_1

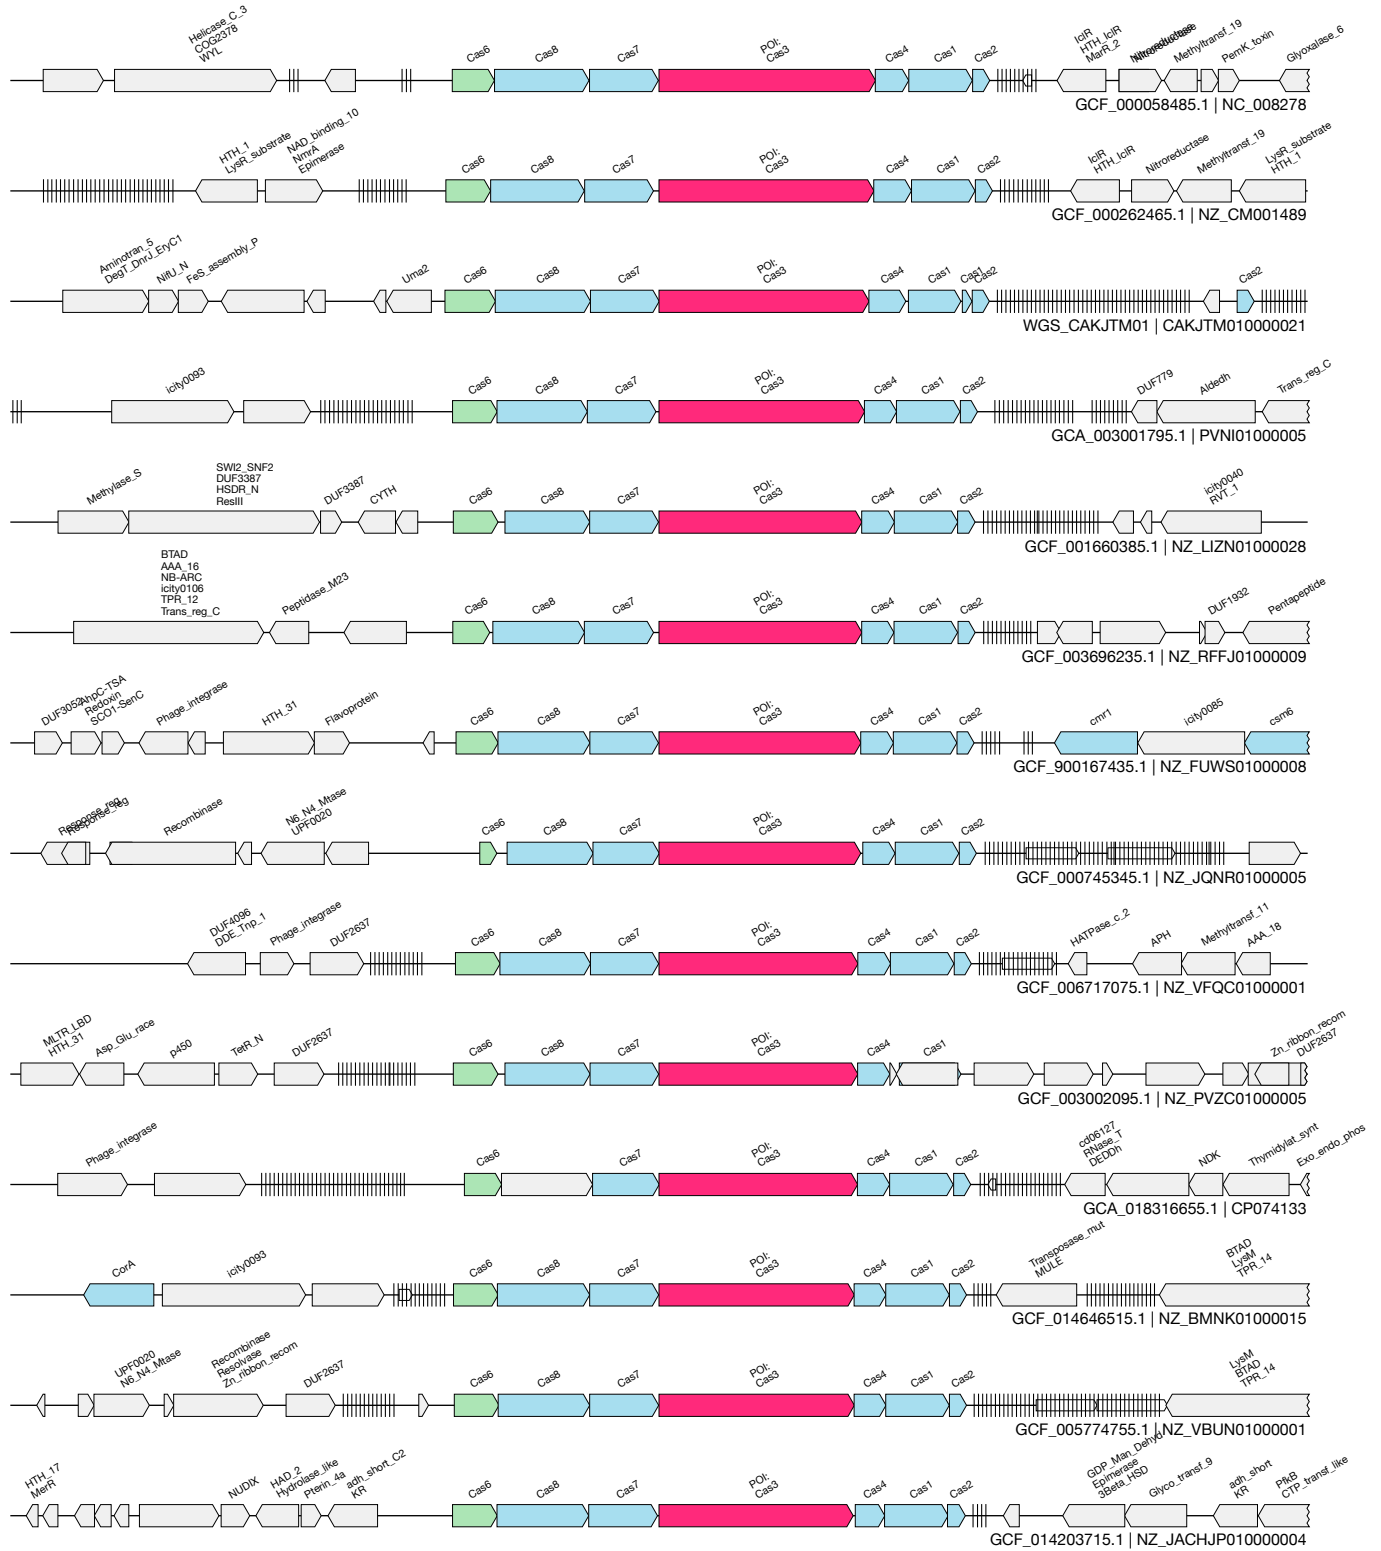

1kb

Q

**UAS-38**  
Cas-Fusions

**(Cmr6\_Cmr1 fusion)**  
GCF\_021018745.1&&NZ\_CP063845&&4894452\_4896432\_-1

24 / 37.1

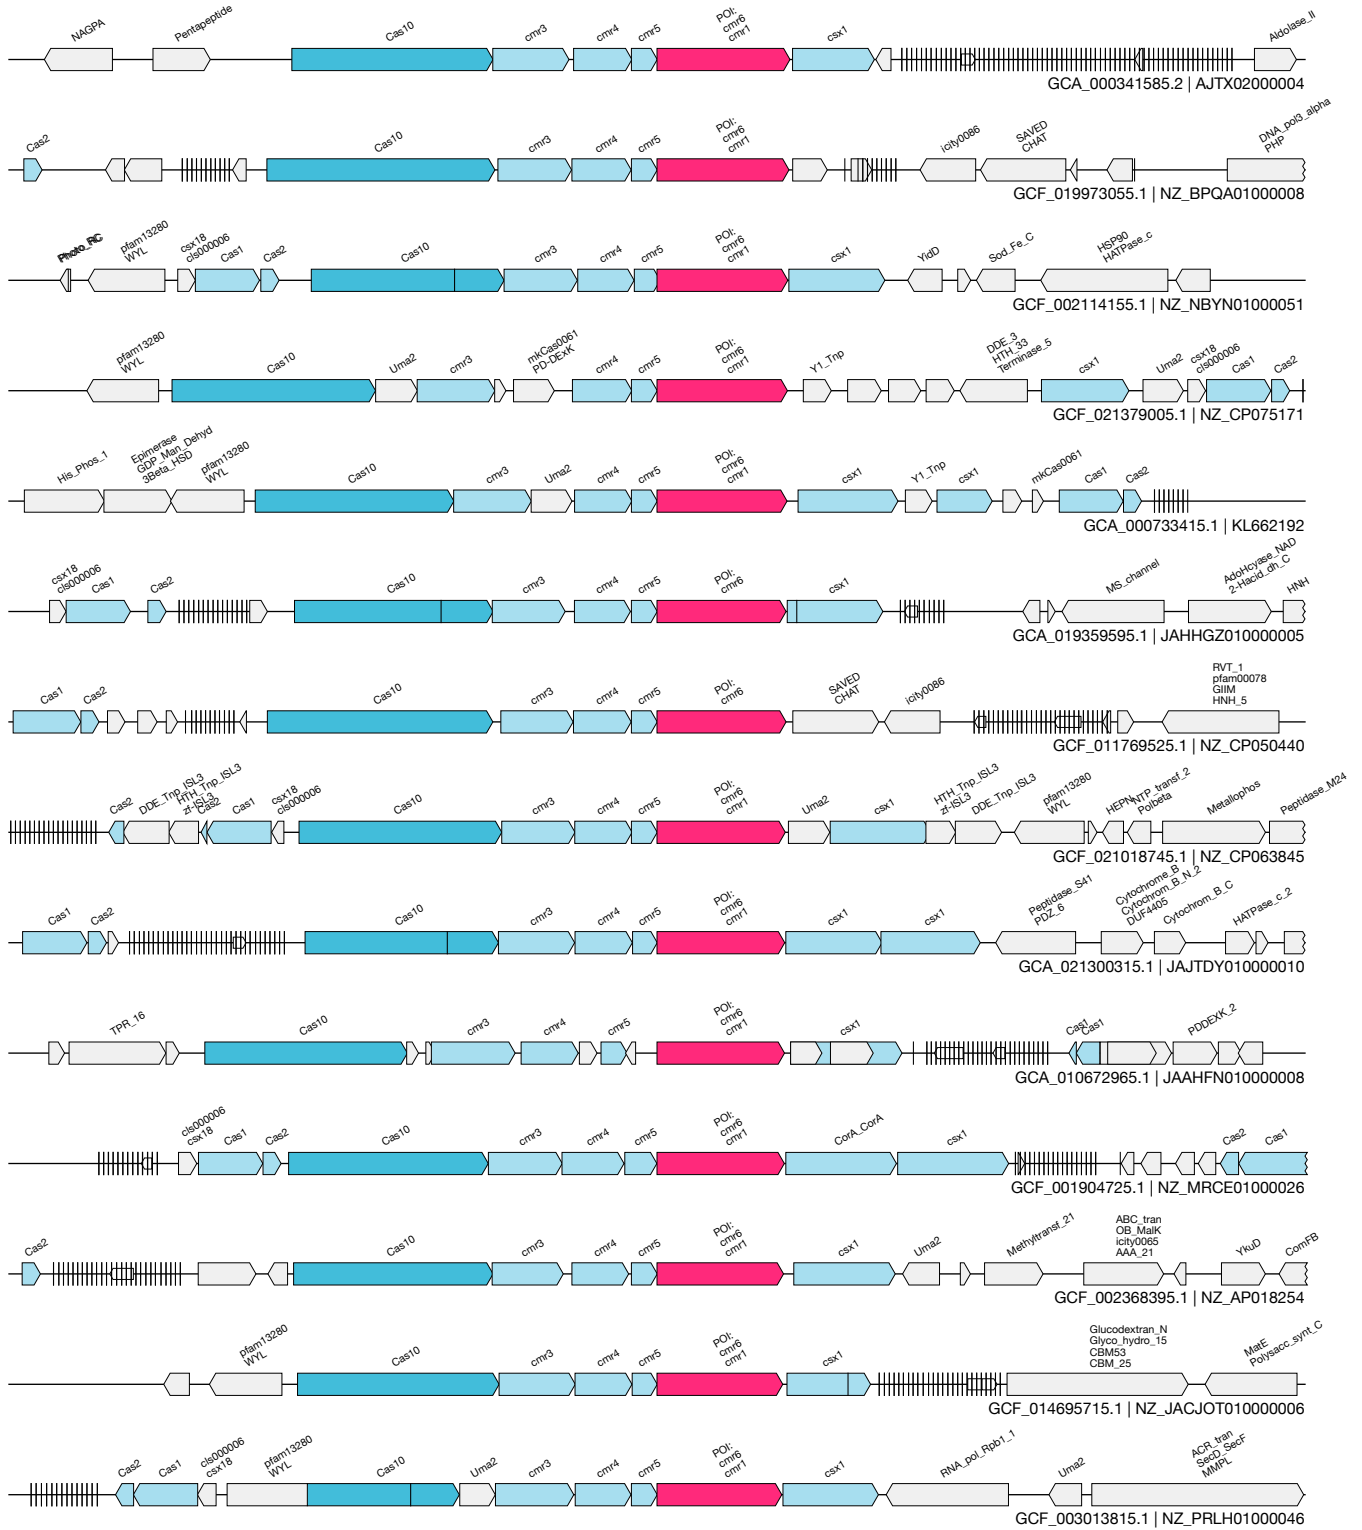

1kb

R

UAS-39  
Cas-Fusions

(Cas6\_Cas5\_fusion)  
IMG\_3300001592&&Draft\_10000135&&23396\_24782\_1

4 / 4.0

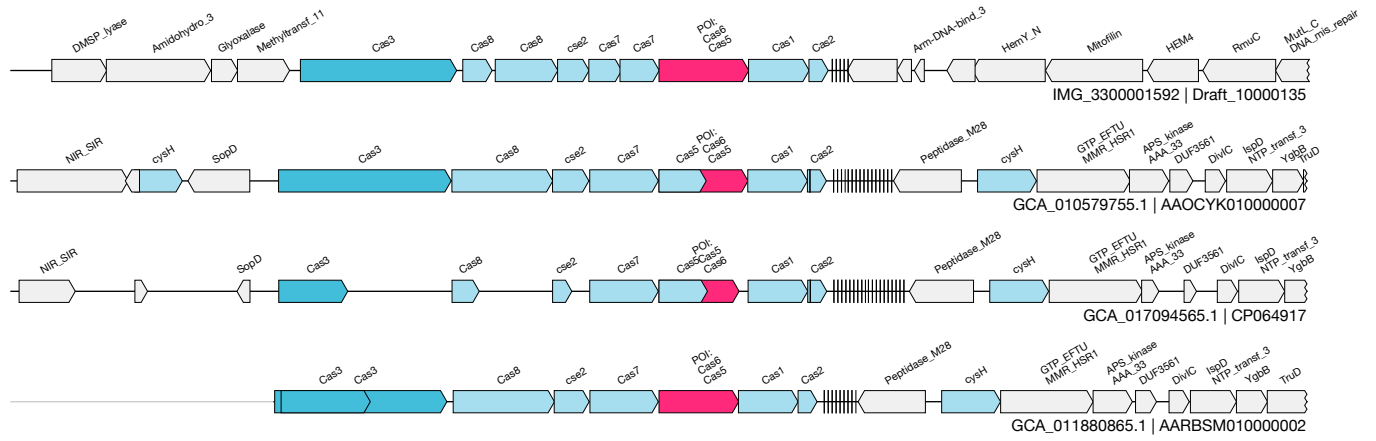

1kb



S

**UAS-40**  
Cas-Fusions

**(Csa5\_Csa4 fusion)**

4 / 6.1

IMG\_3300021472&&a0190363\_1001919&&8327\_9779\_1

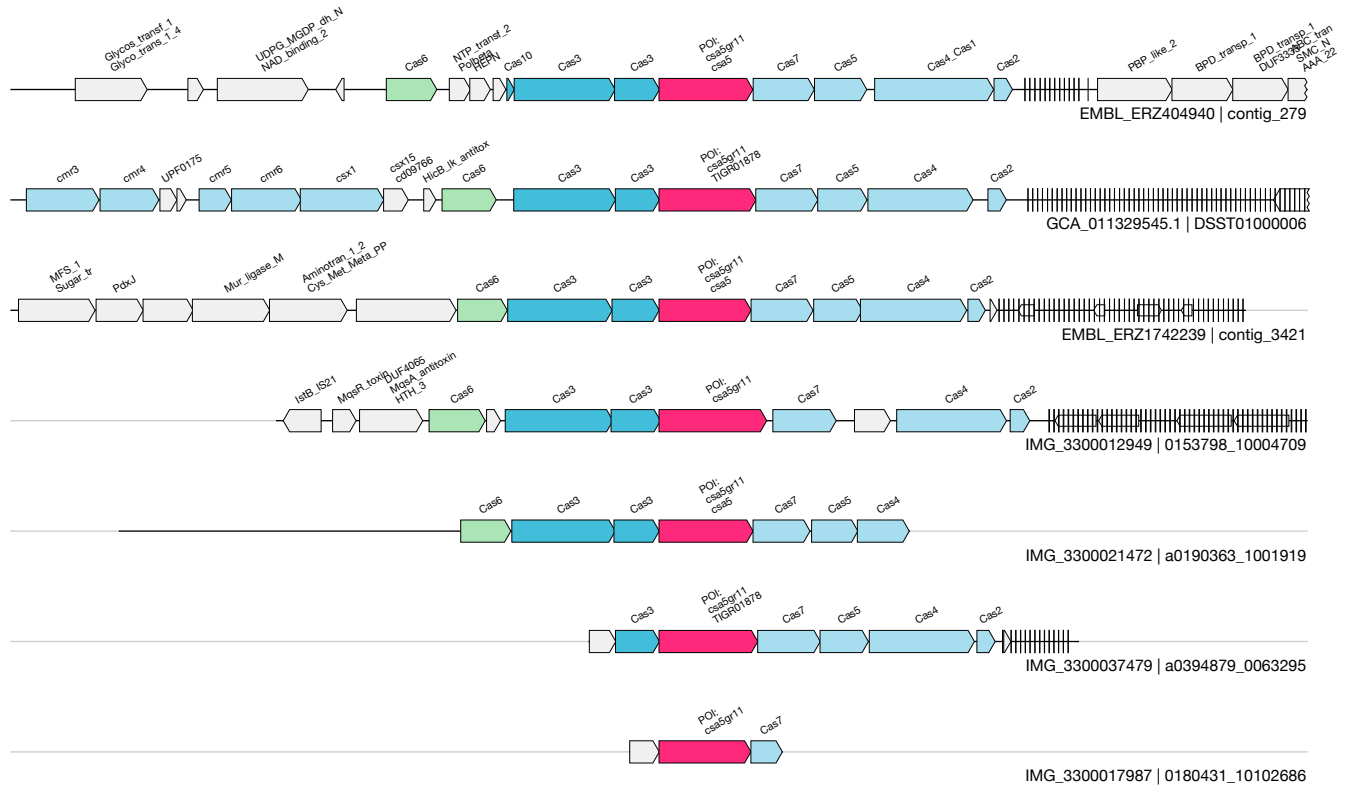

1kb

T

**UAS-41**  
Cas-Fusions

**(Cas8\_Cas5 fusion)**  
WGS\_JABTL01&&JABTL010073043&&184\_2911\_1

4 / 4.0

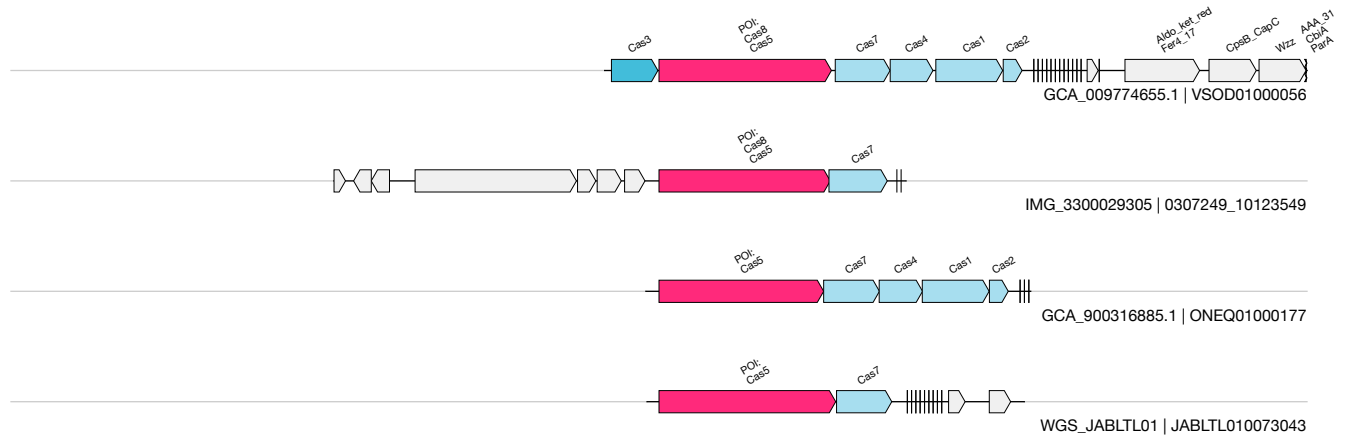

1kb

U

UAS-42  
Acquisition

(DUF3761)  
EMBL\_ERZ724514&&contig\_3192&&343\_1033\_-1

22 / 22.7

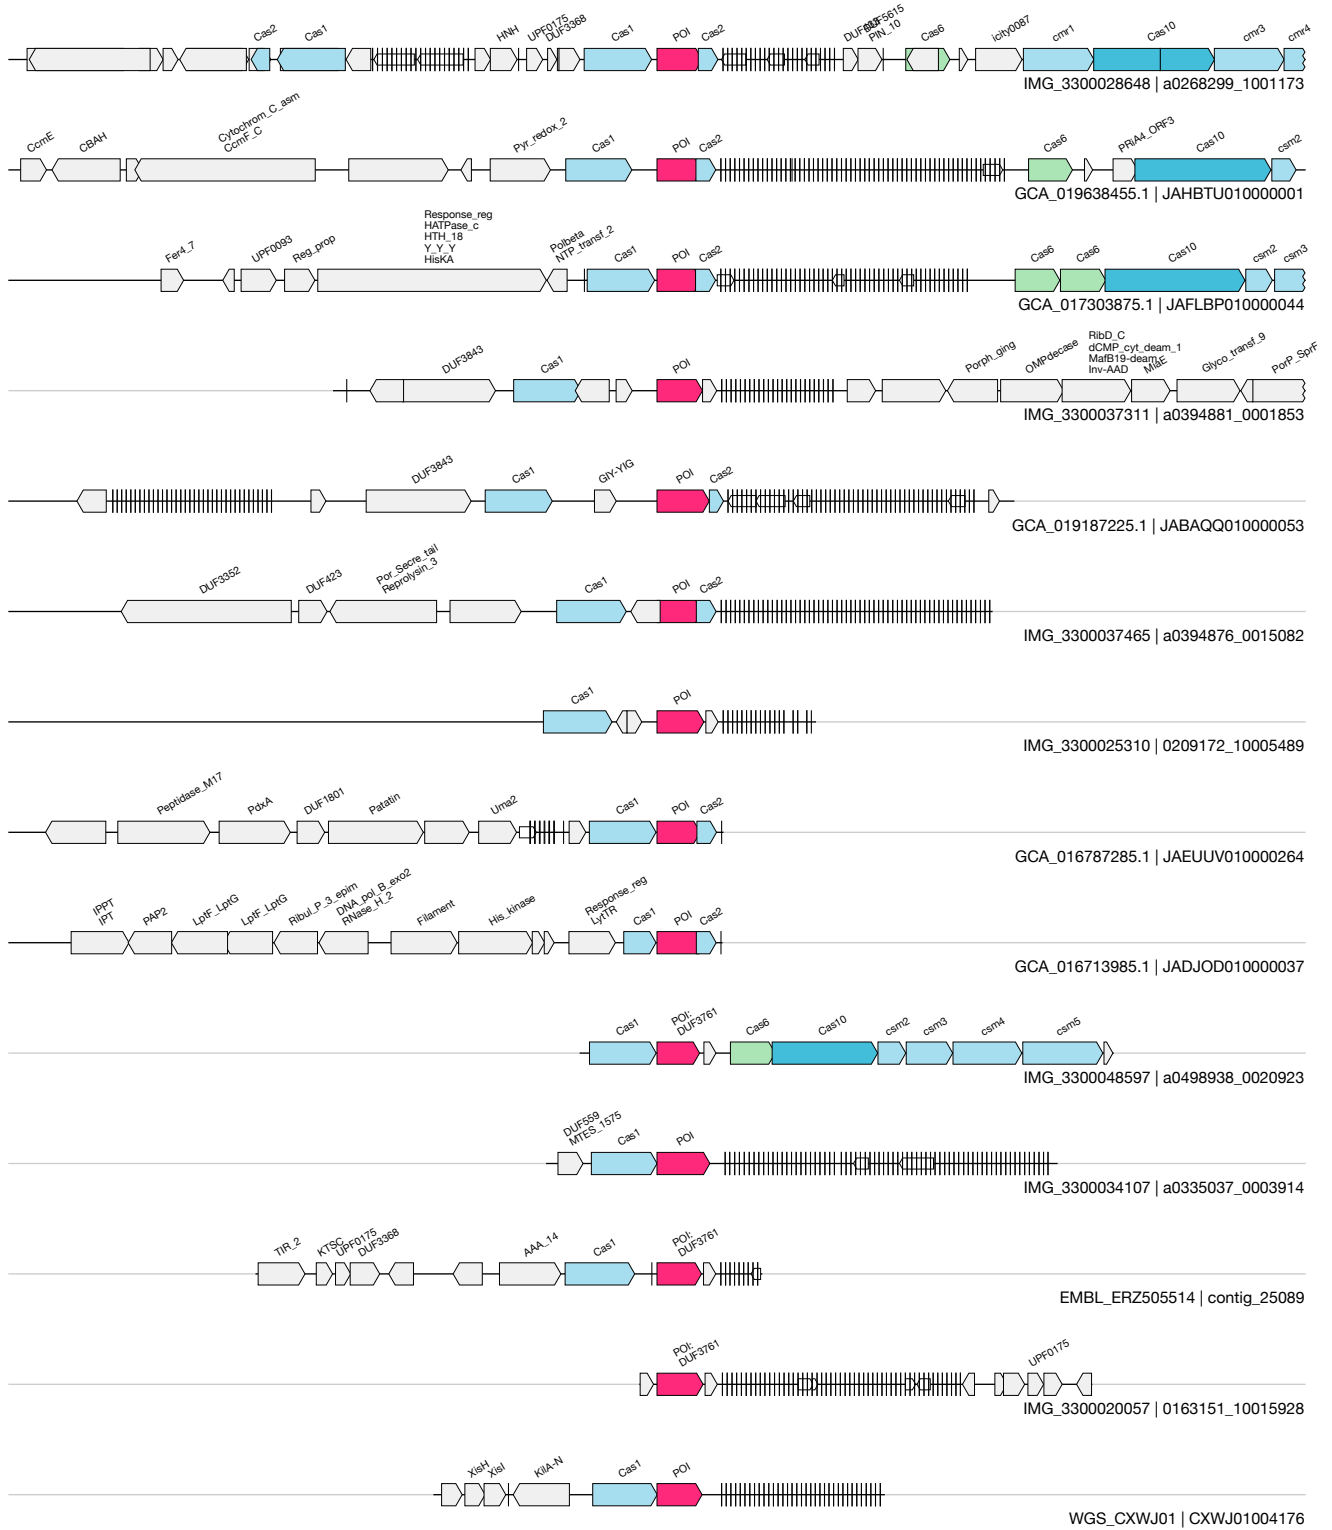

1kb

V

**UAS-43**  
Acquisition

**(RVT + group II intron PrimPol)**  
GCA\_002358875.1&&DEPS01000038&&15824\_19211\_-1

14 / 15.7

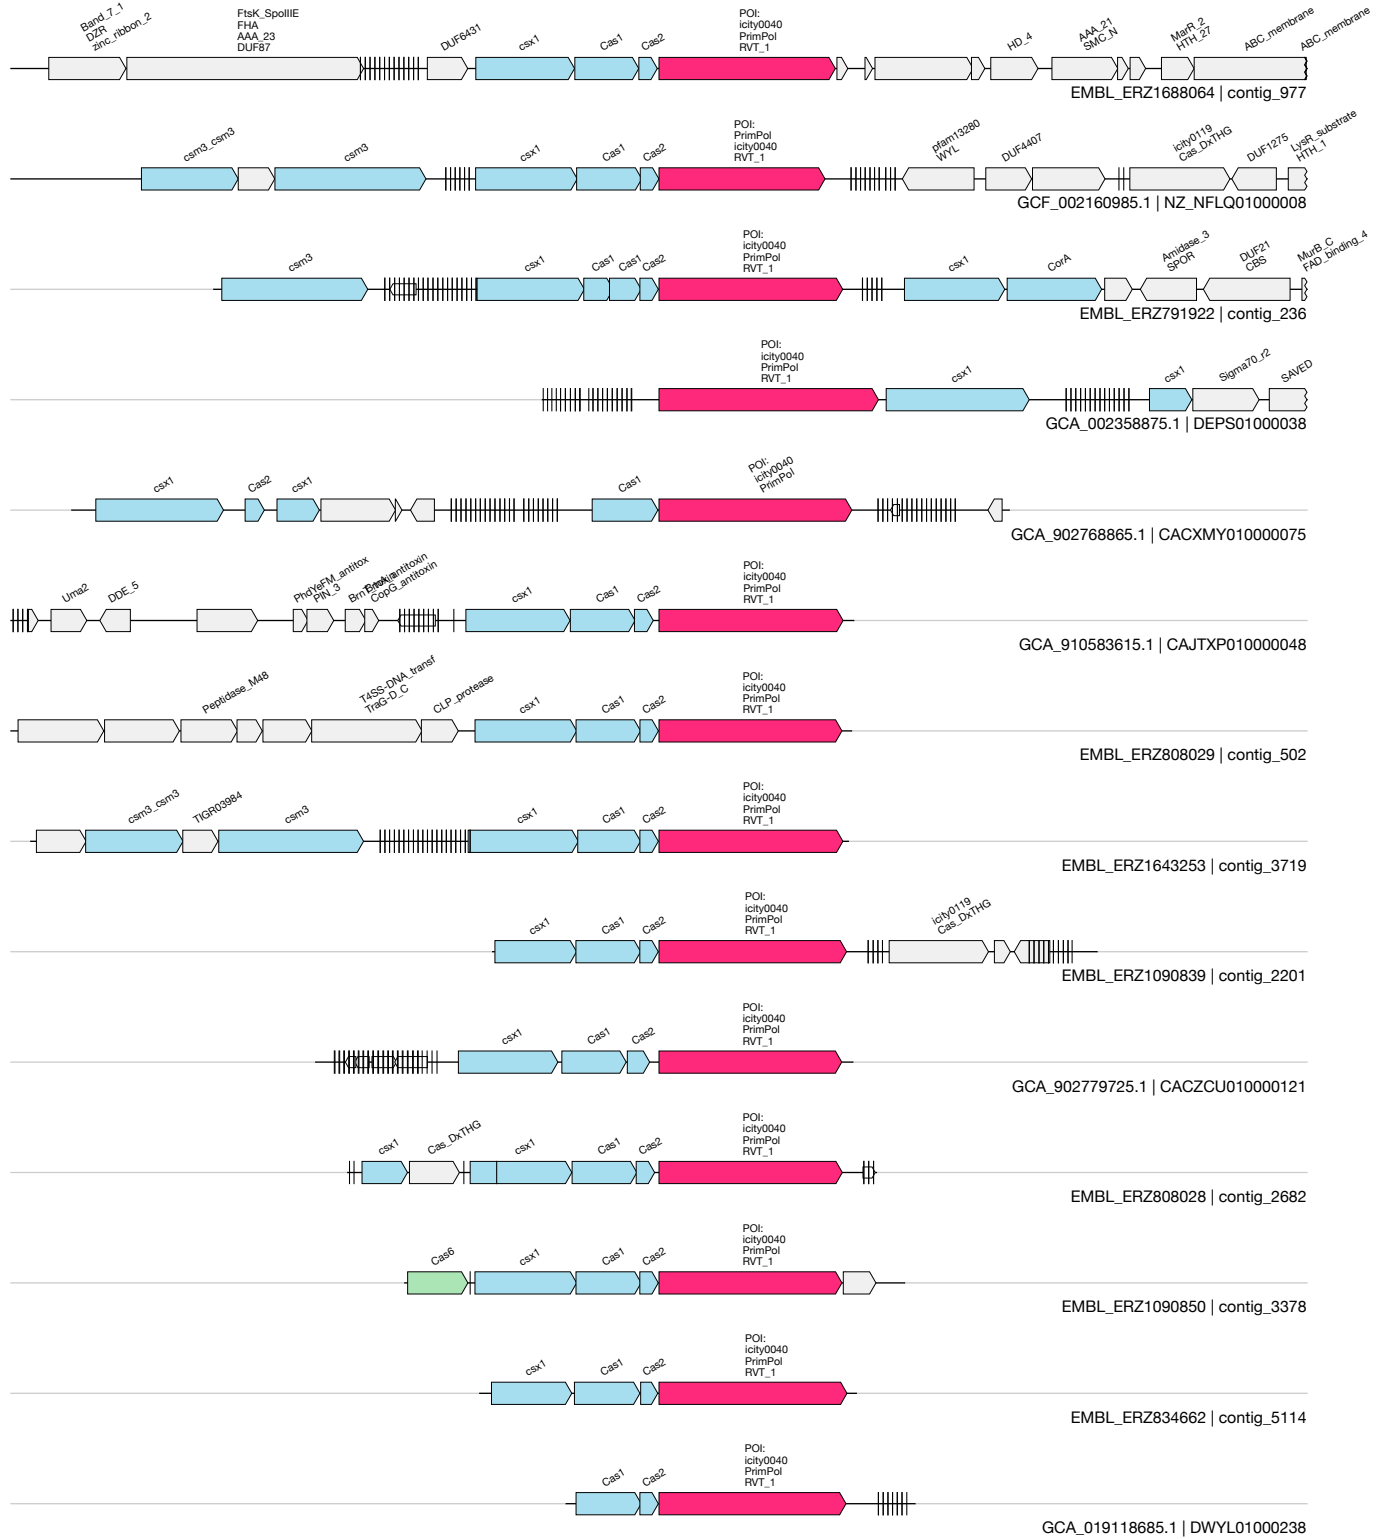

W

**UAS-3**  
Acquisition

**(DUF370)**

2 / 3.5

GCA\_013359445.1&&JABWBV010000281&&2844\_3129\_-1

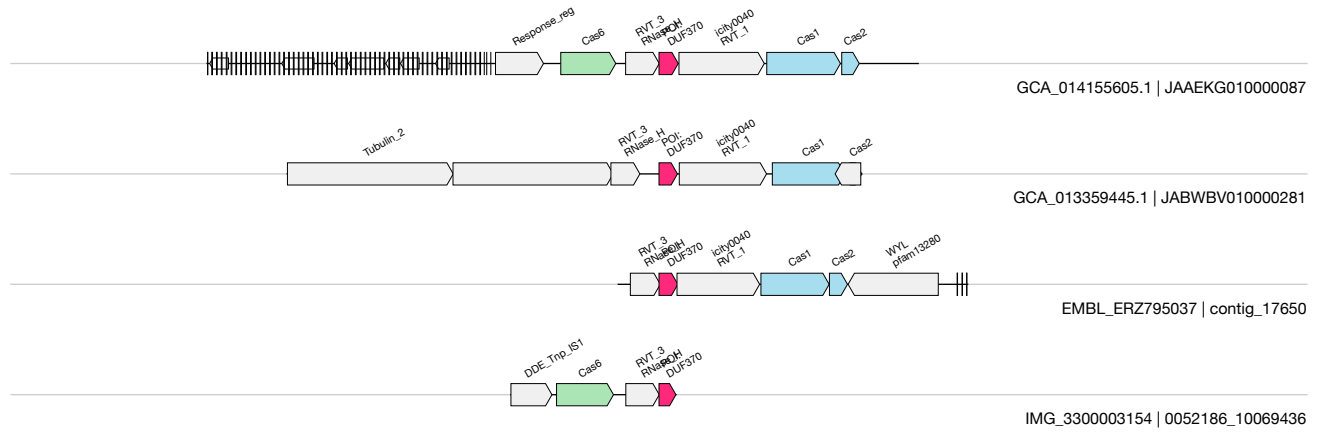

1kb

X

**UAS-7**  
Acquisition

**(vWA + RDD)**  
GCA\_016179065.1&&JACOSD010000405&&5712\_7455\_-1

2 / 4.7

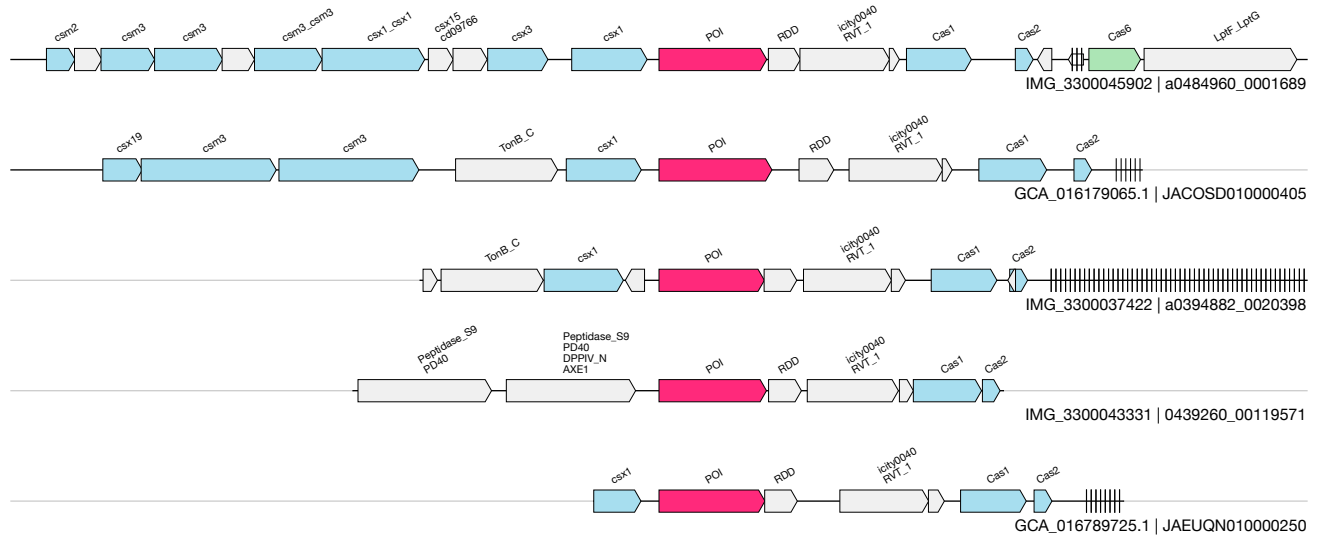

1kb

Y

UAS-2  
Acquisition

(Tbf2 WYL)

GCA\_016223105.1&&JACRPR010000238&&1\_1870\_1

9 / 13.8

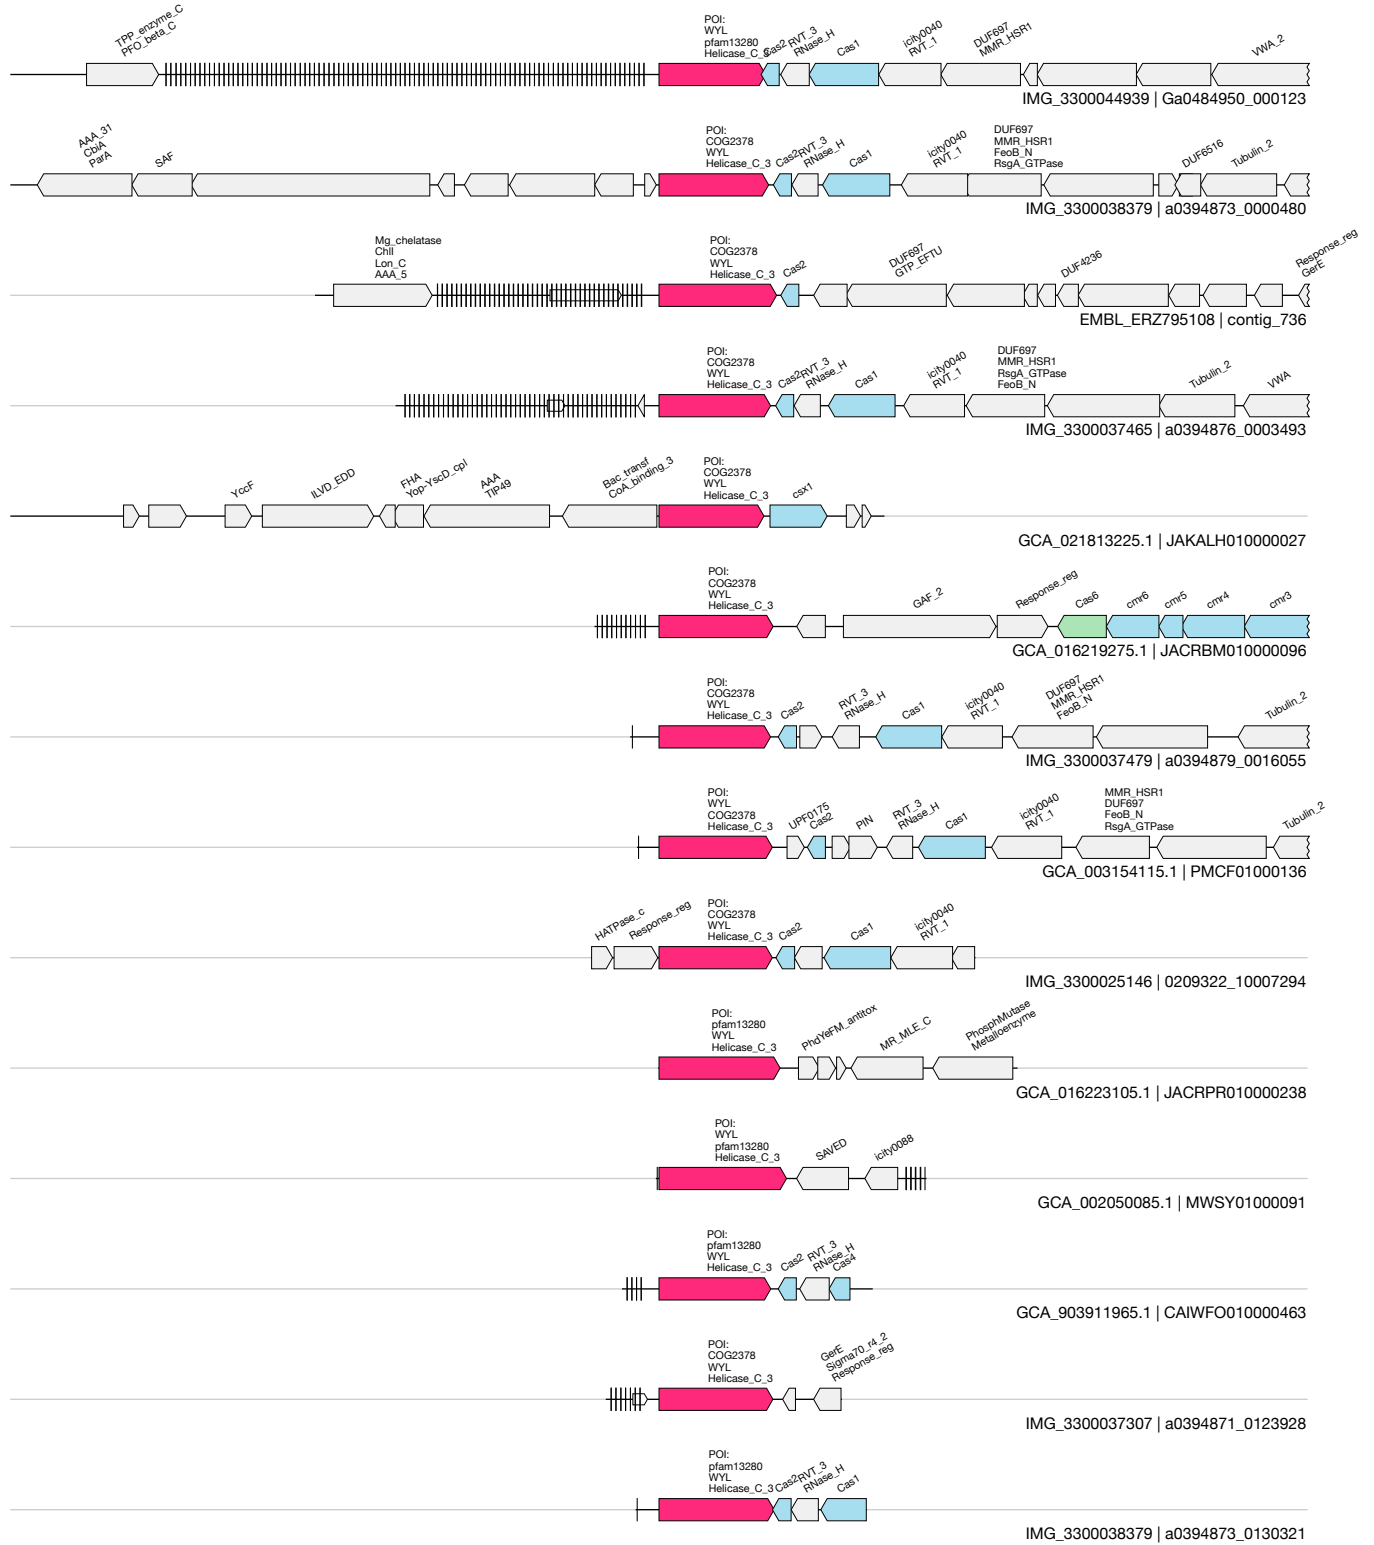

1kb

# Z

**UAS-44**  
Acquisition

**(DUF2797 large zinc finger protein)**  
GCA\_016840085.1&&JAEOTA010000034&&18467\_19766\_-1

8 / 9.2

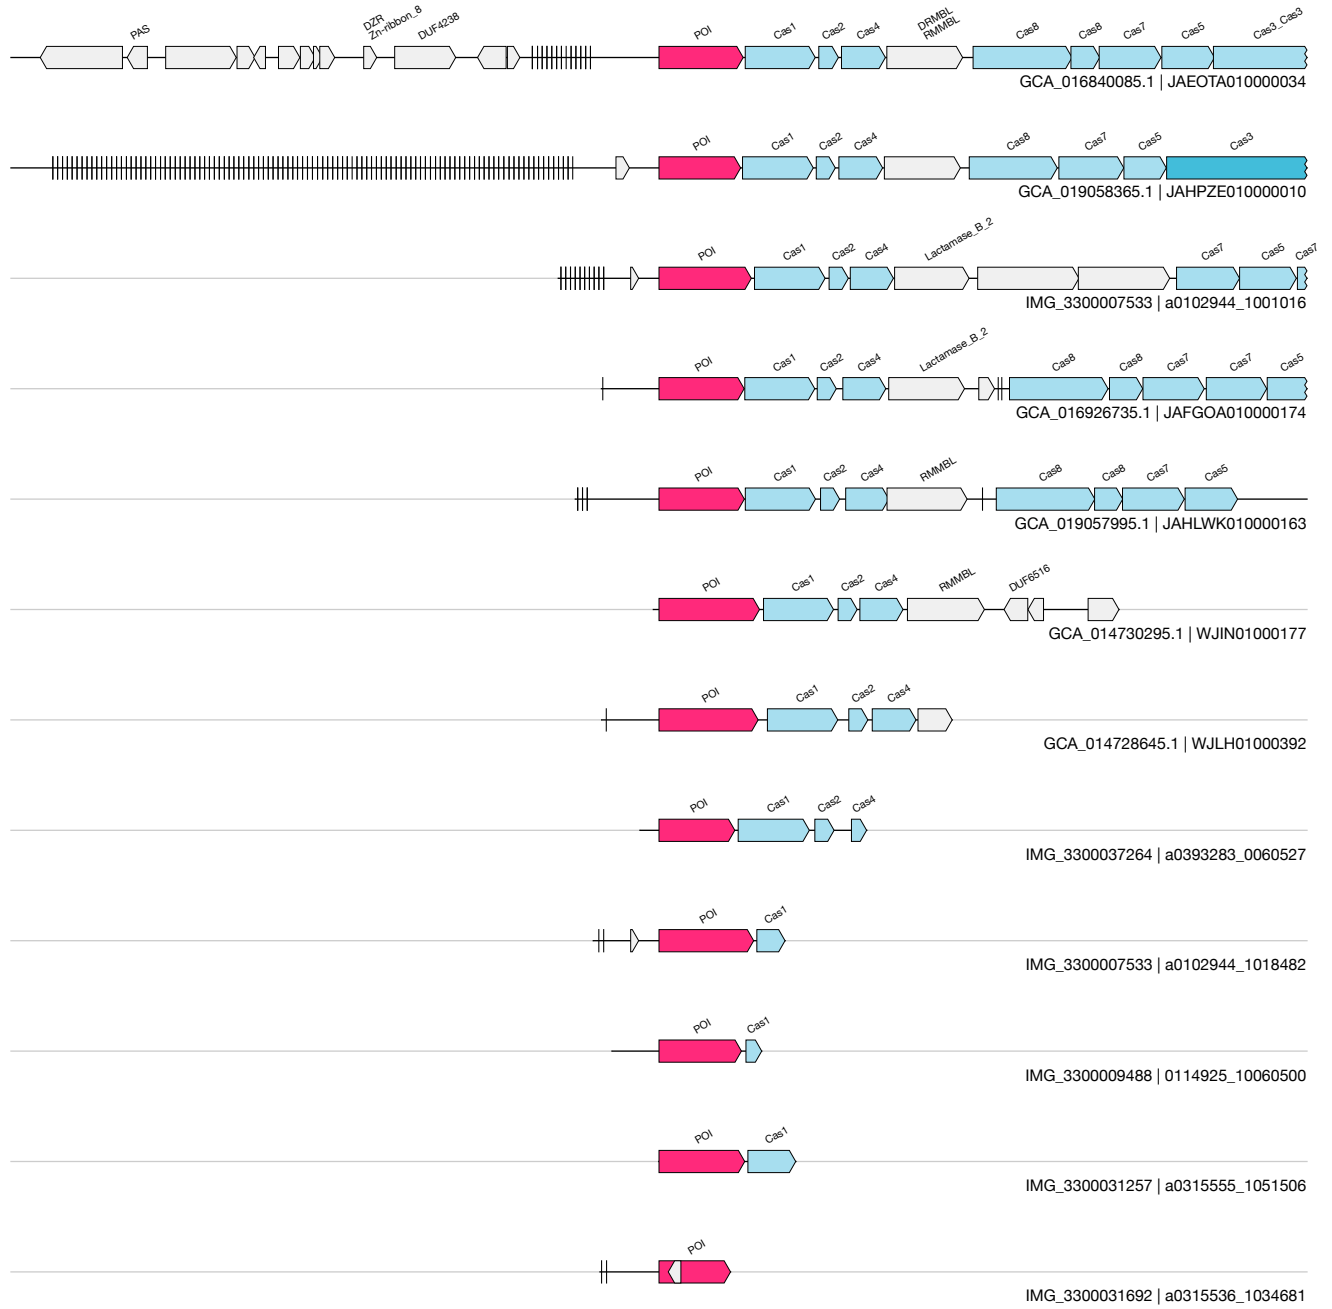

1kb



AA

UAS-45  
Acquisition

(RNaseH)  
GCA\_016876015.1&&VGOD01000184&&7922\_8489\_1

11 / 21.5

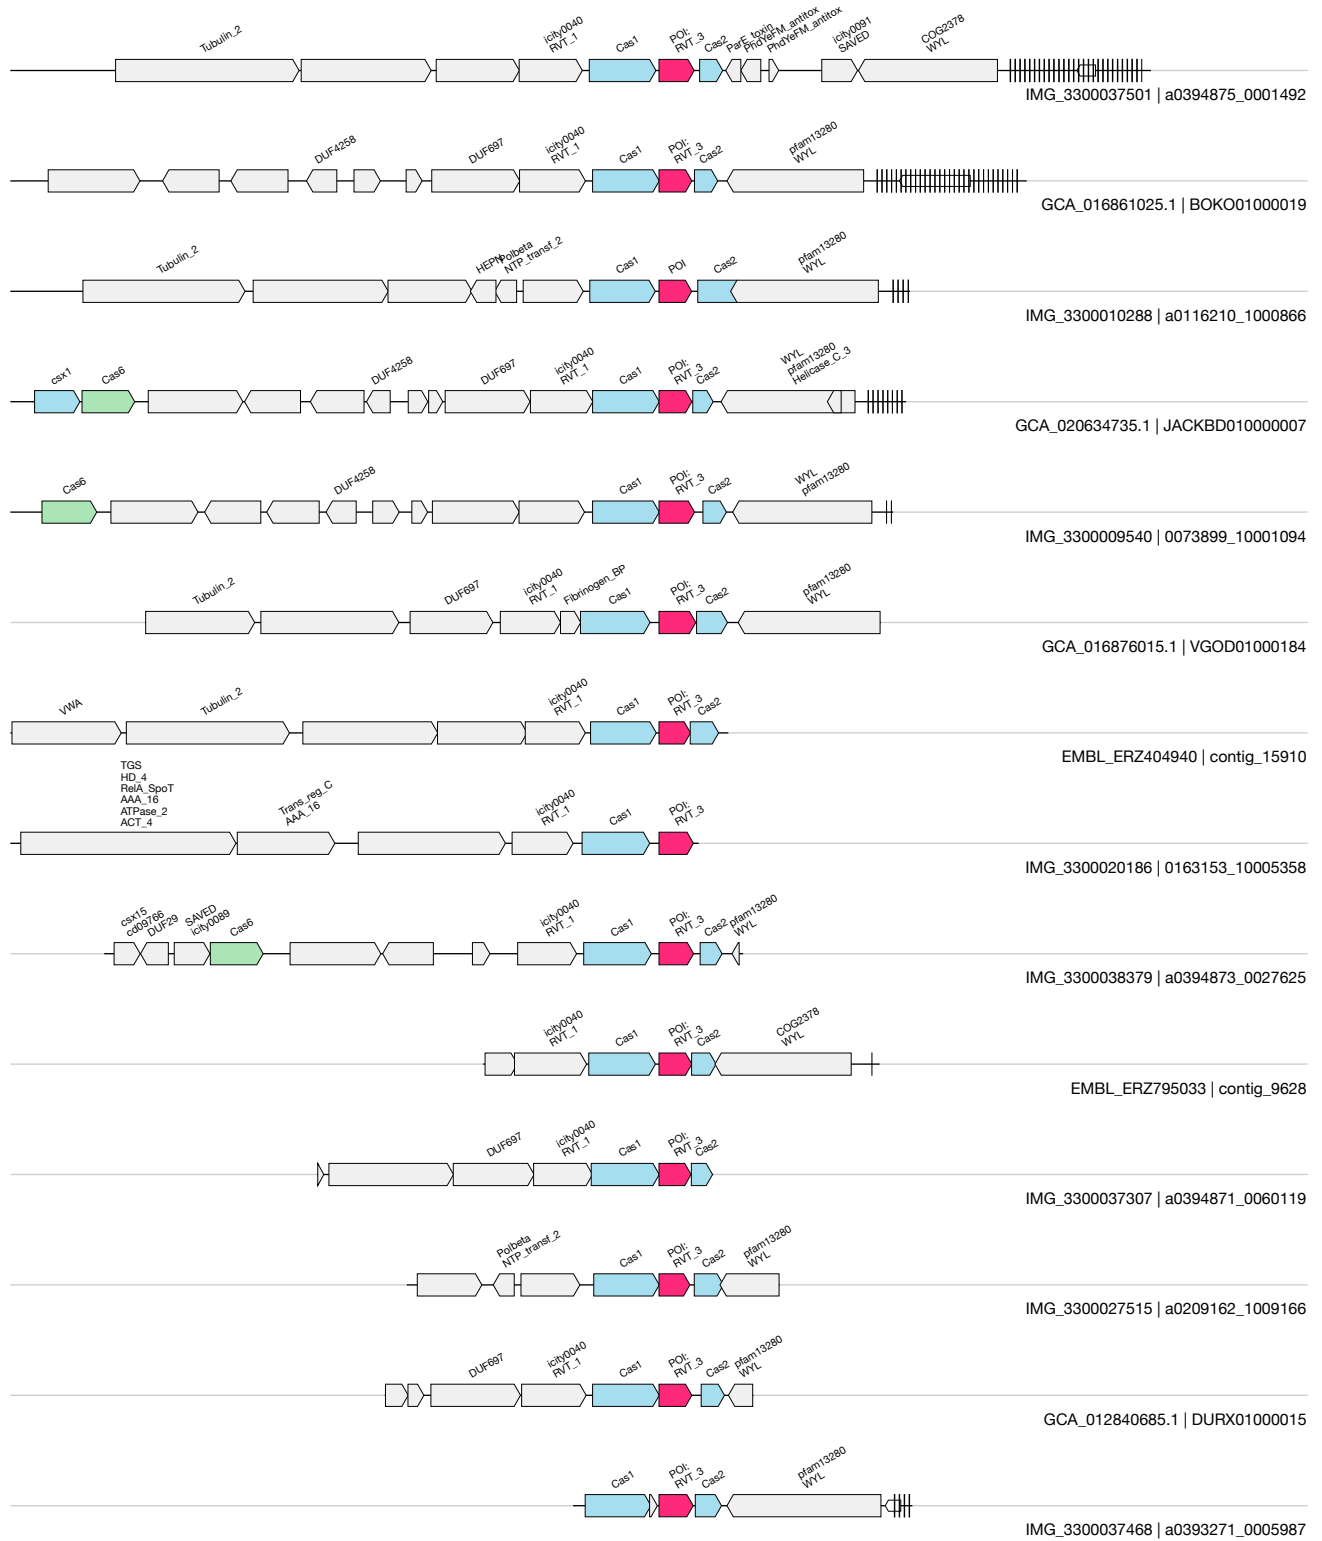

1kb

AB

UAS-13  
Acquisition

(DUF2797)

6 / 7.9

GCA\_018238085.1&&JABCUA010000354&&227\_1190\_-1

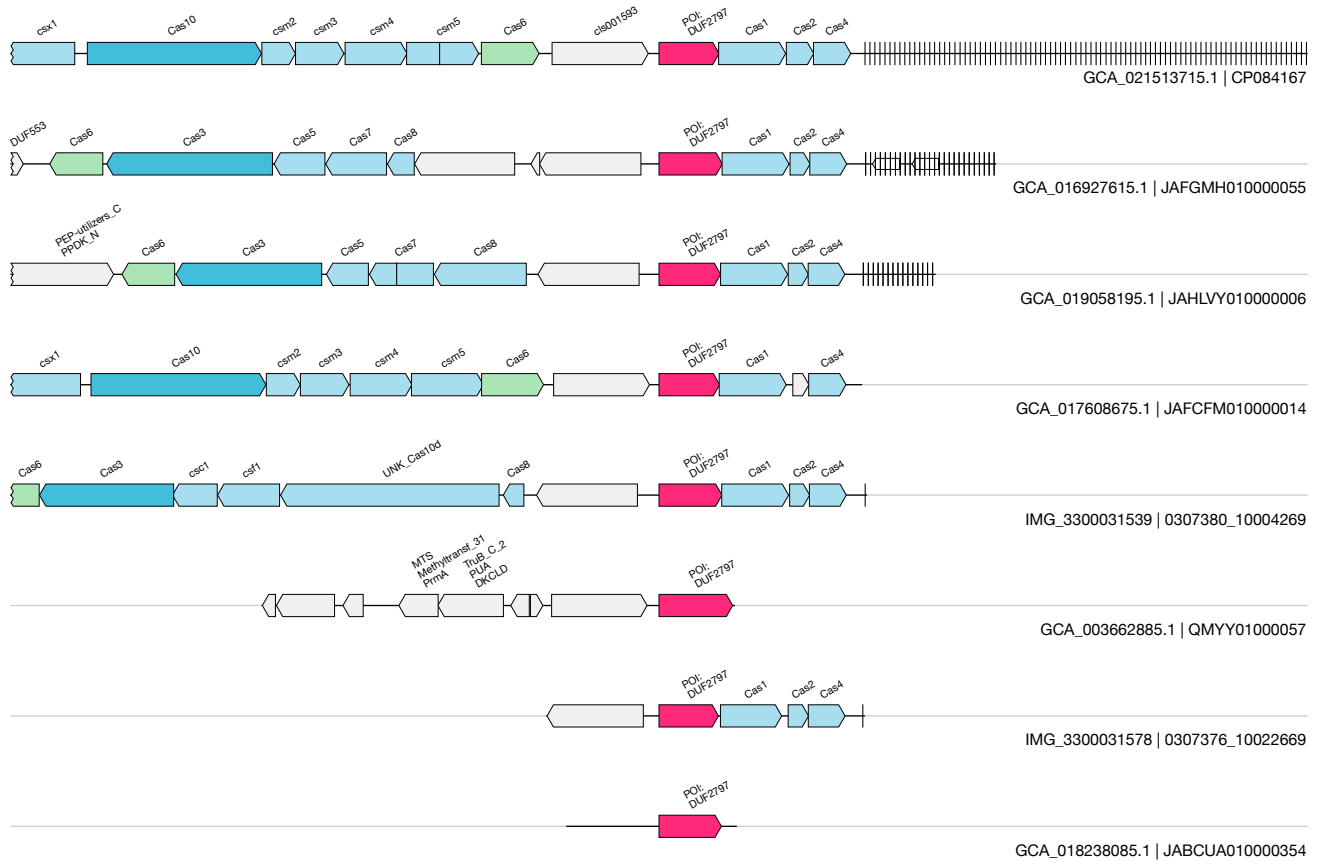

1kb

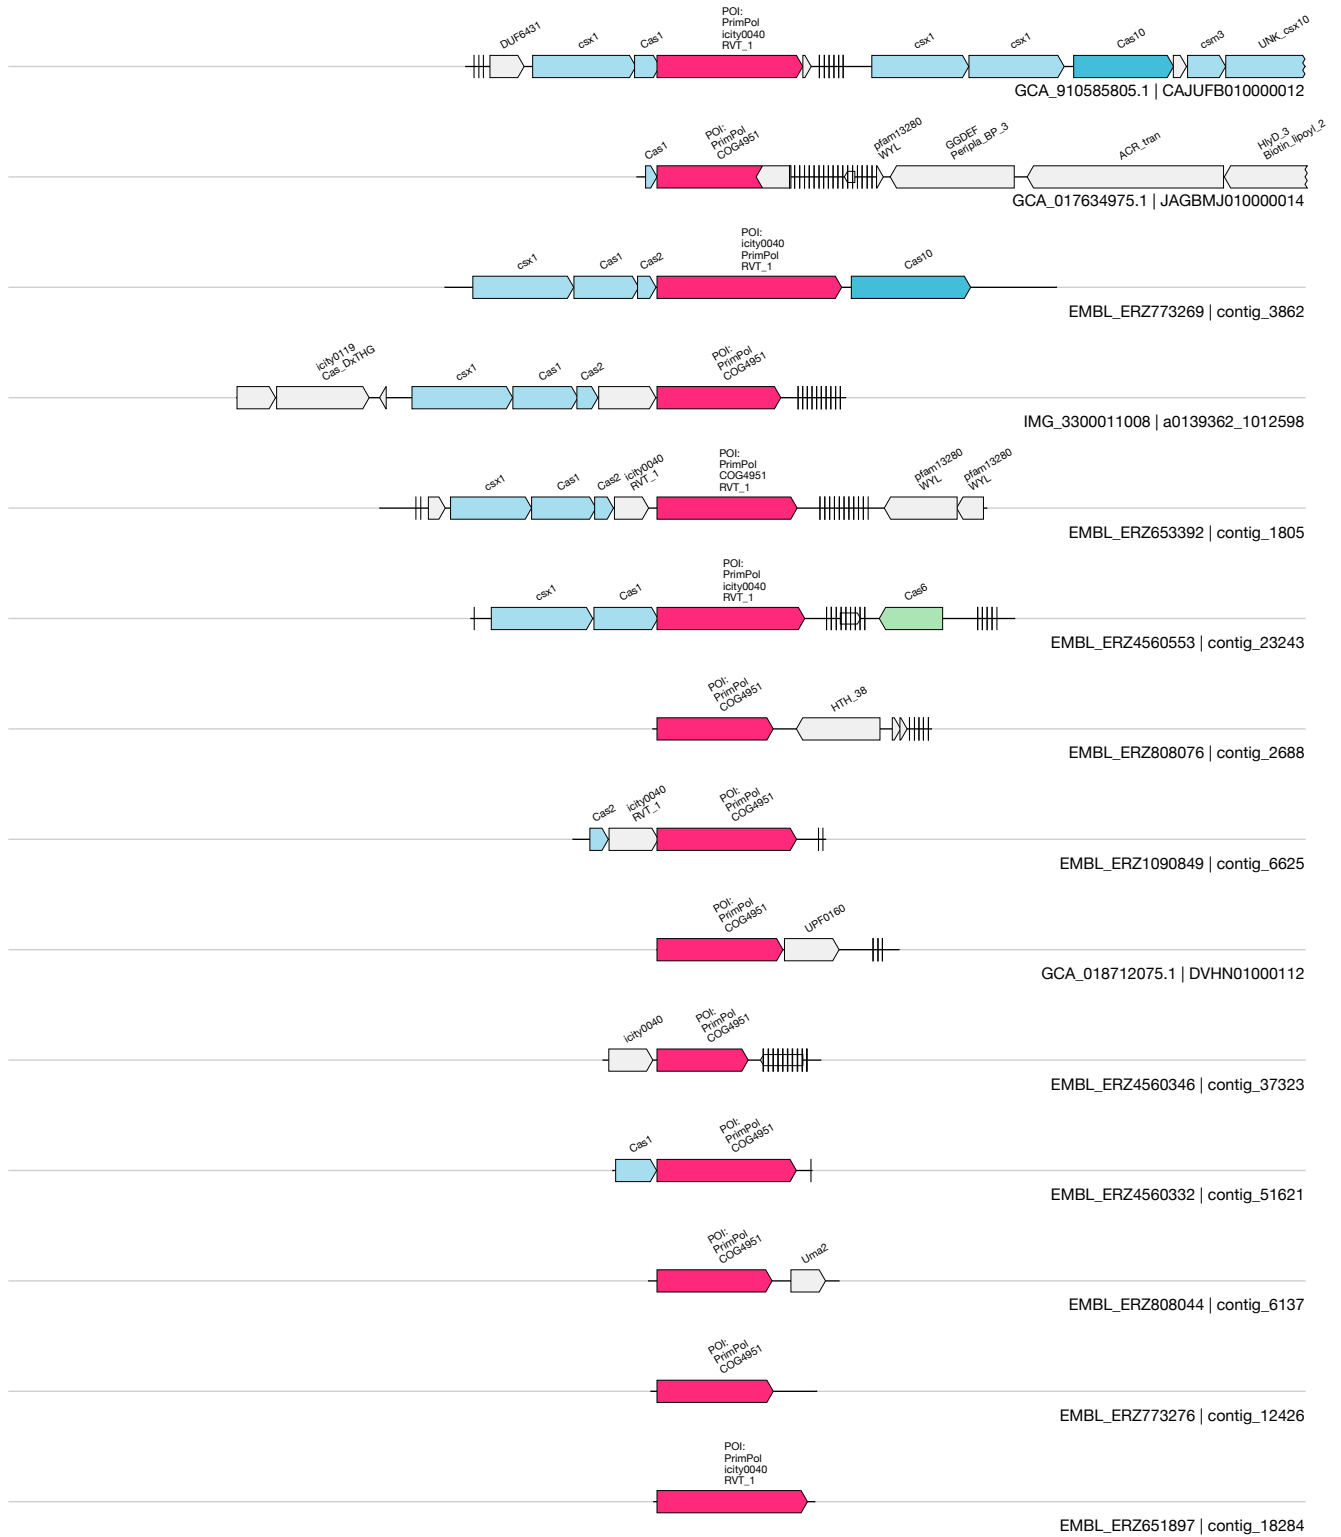

1kb

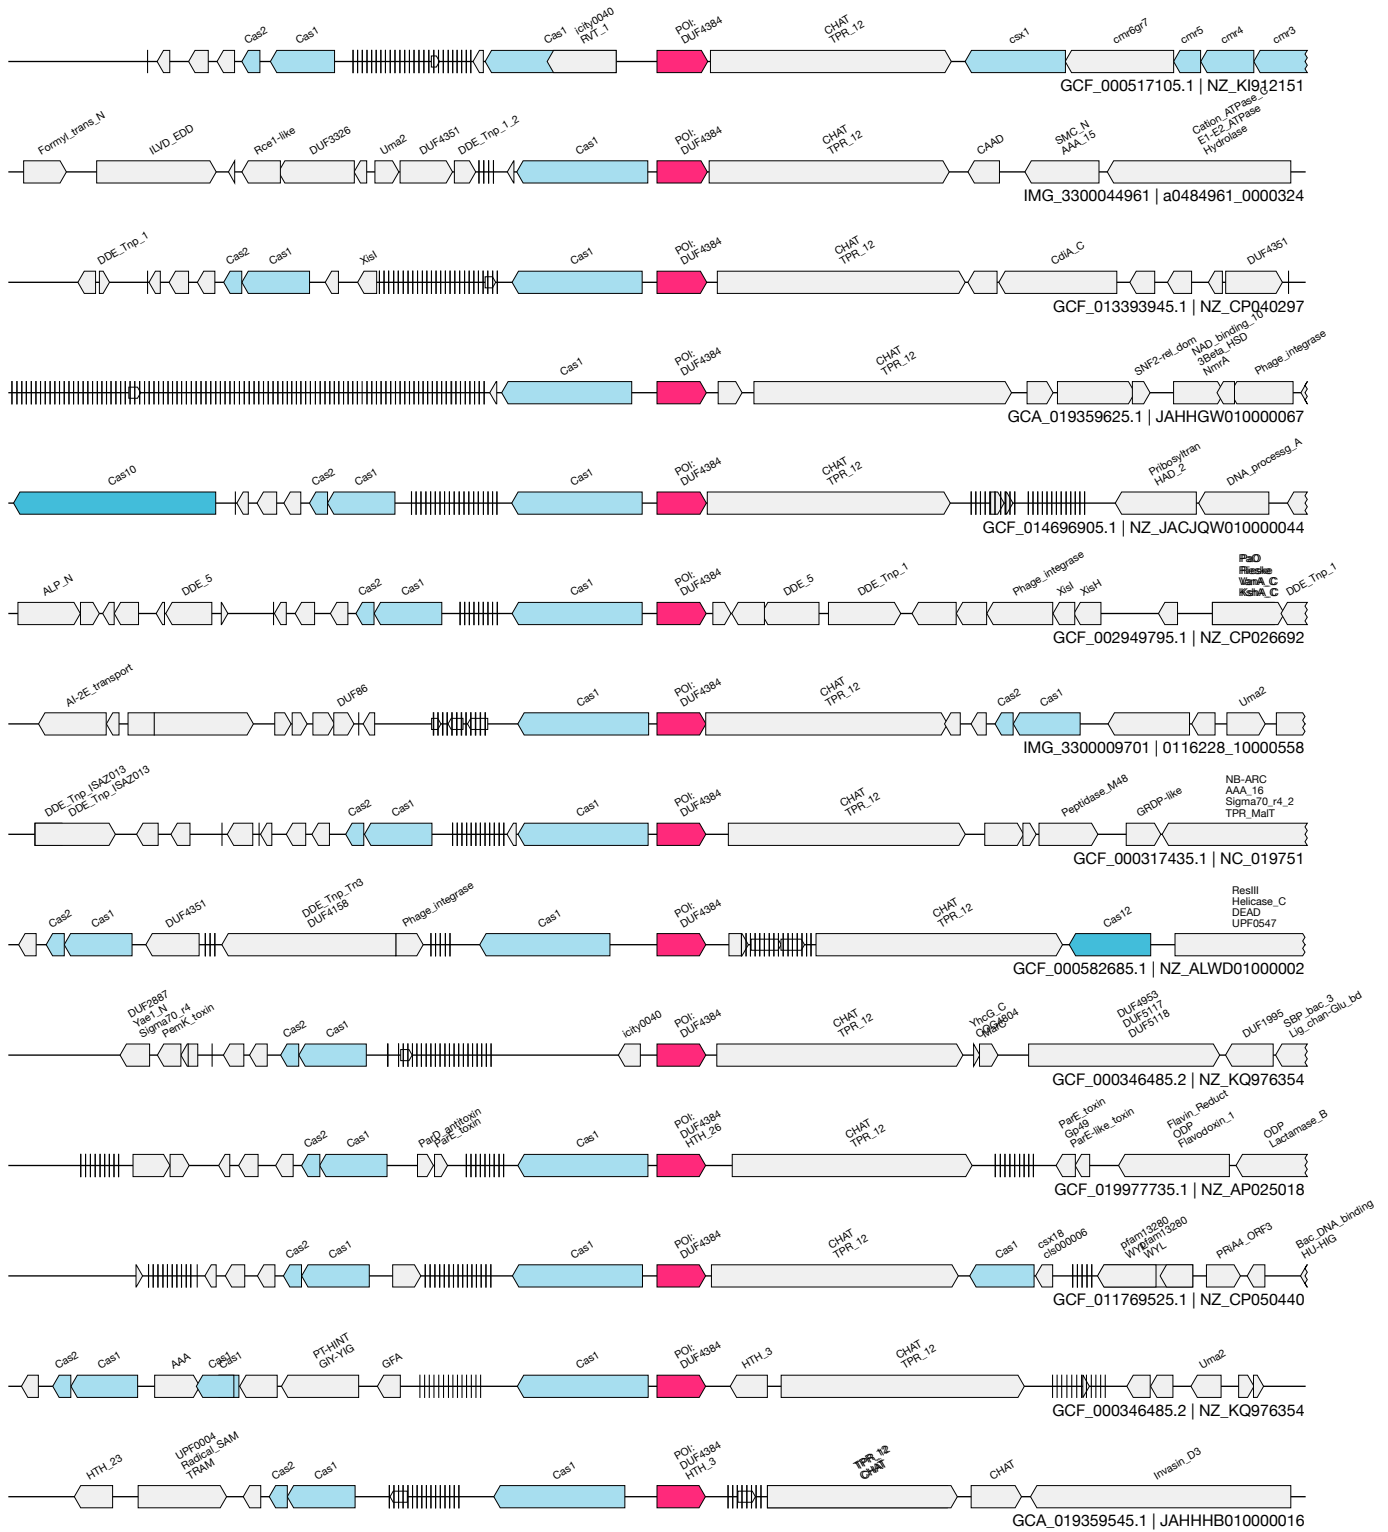

1kb

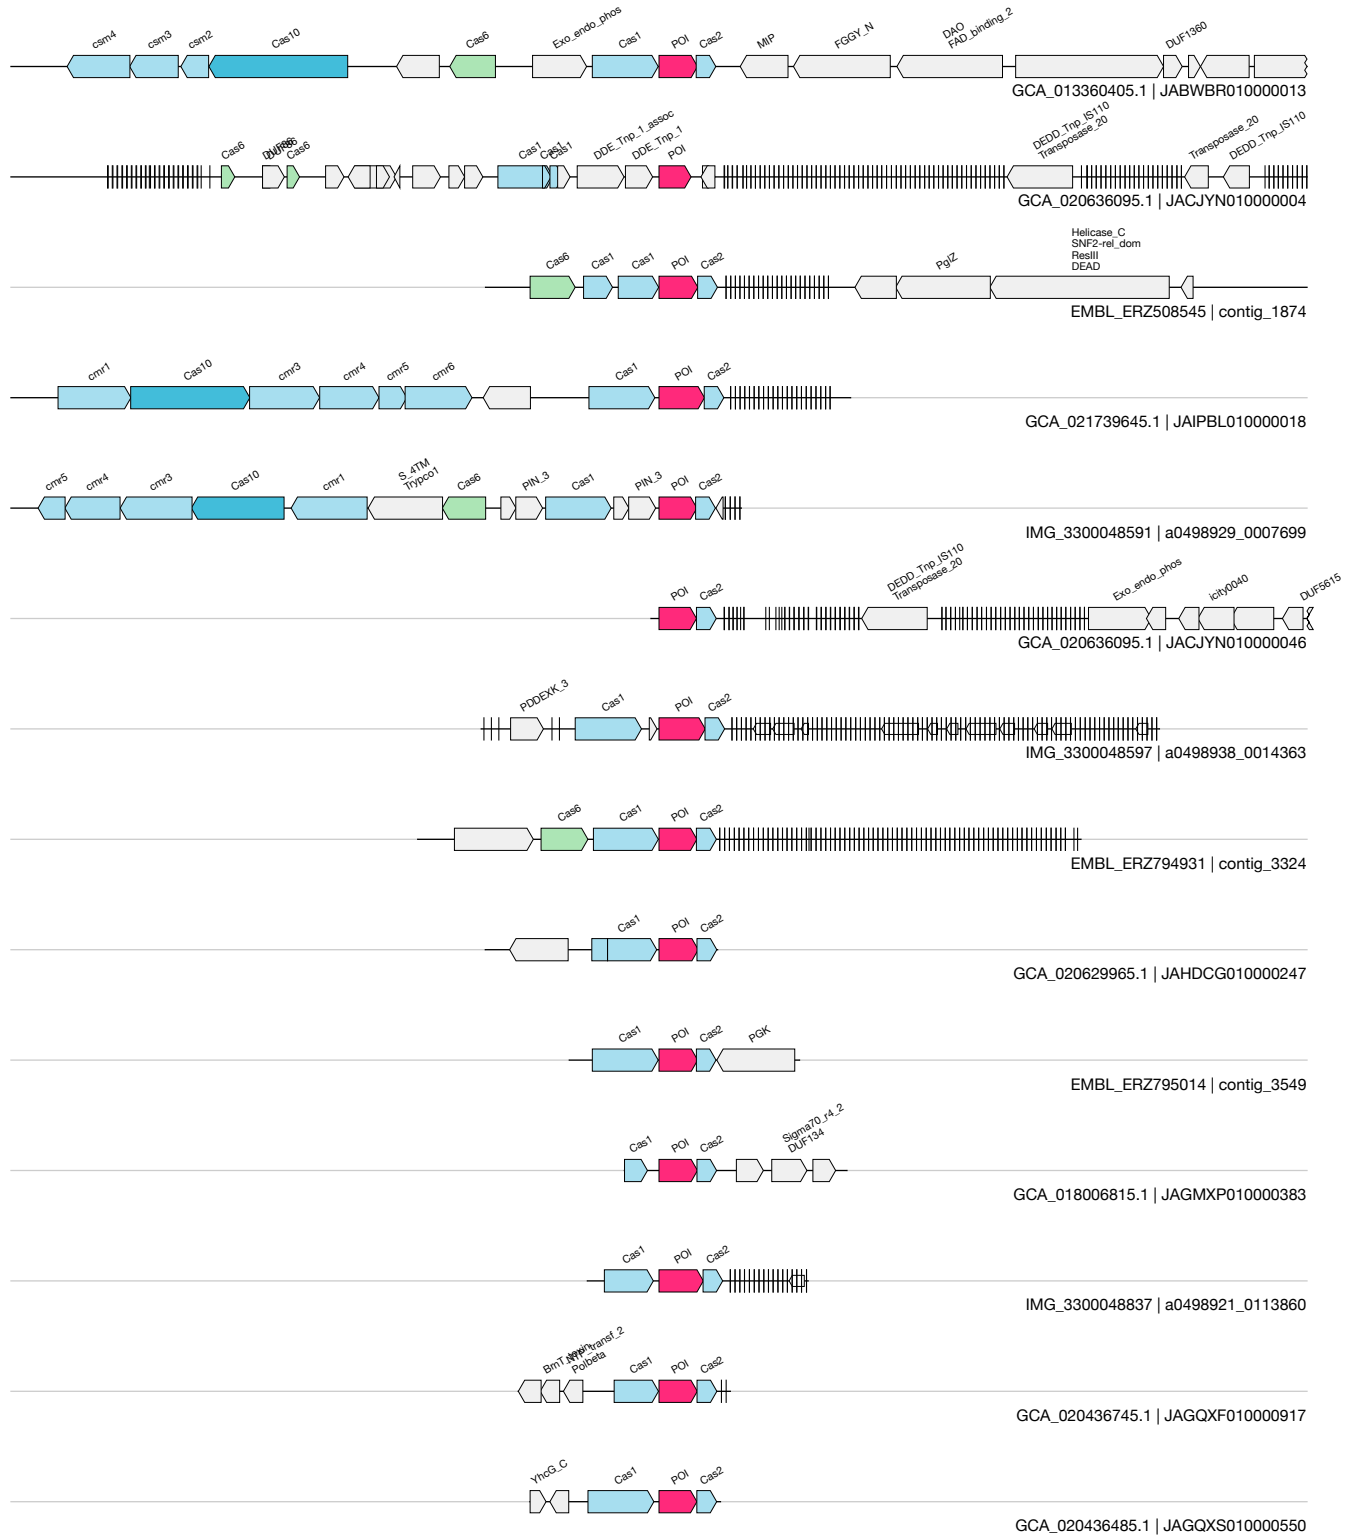

1kb

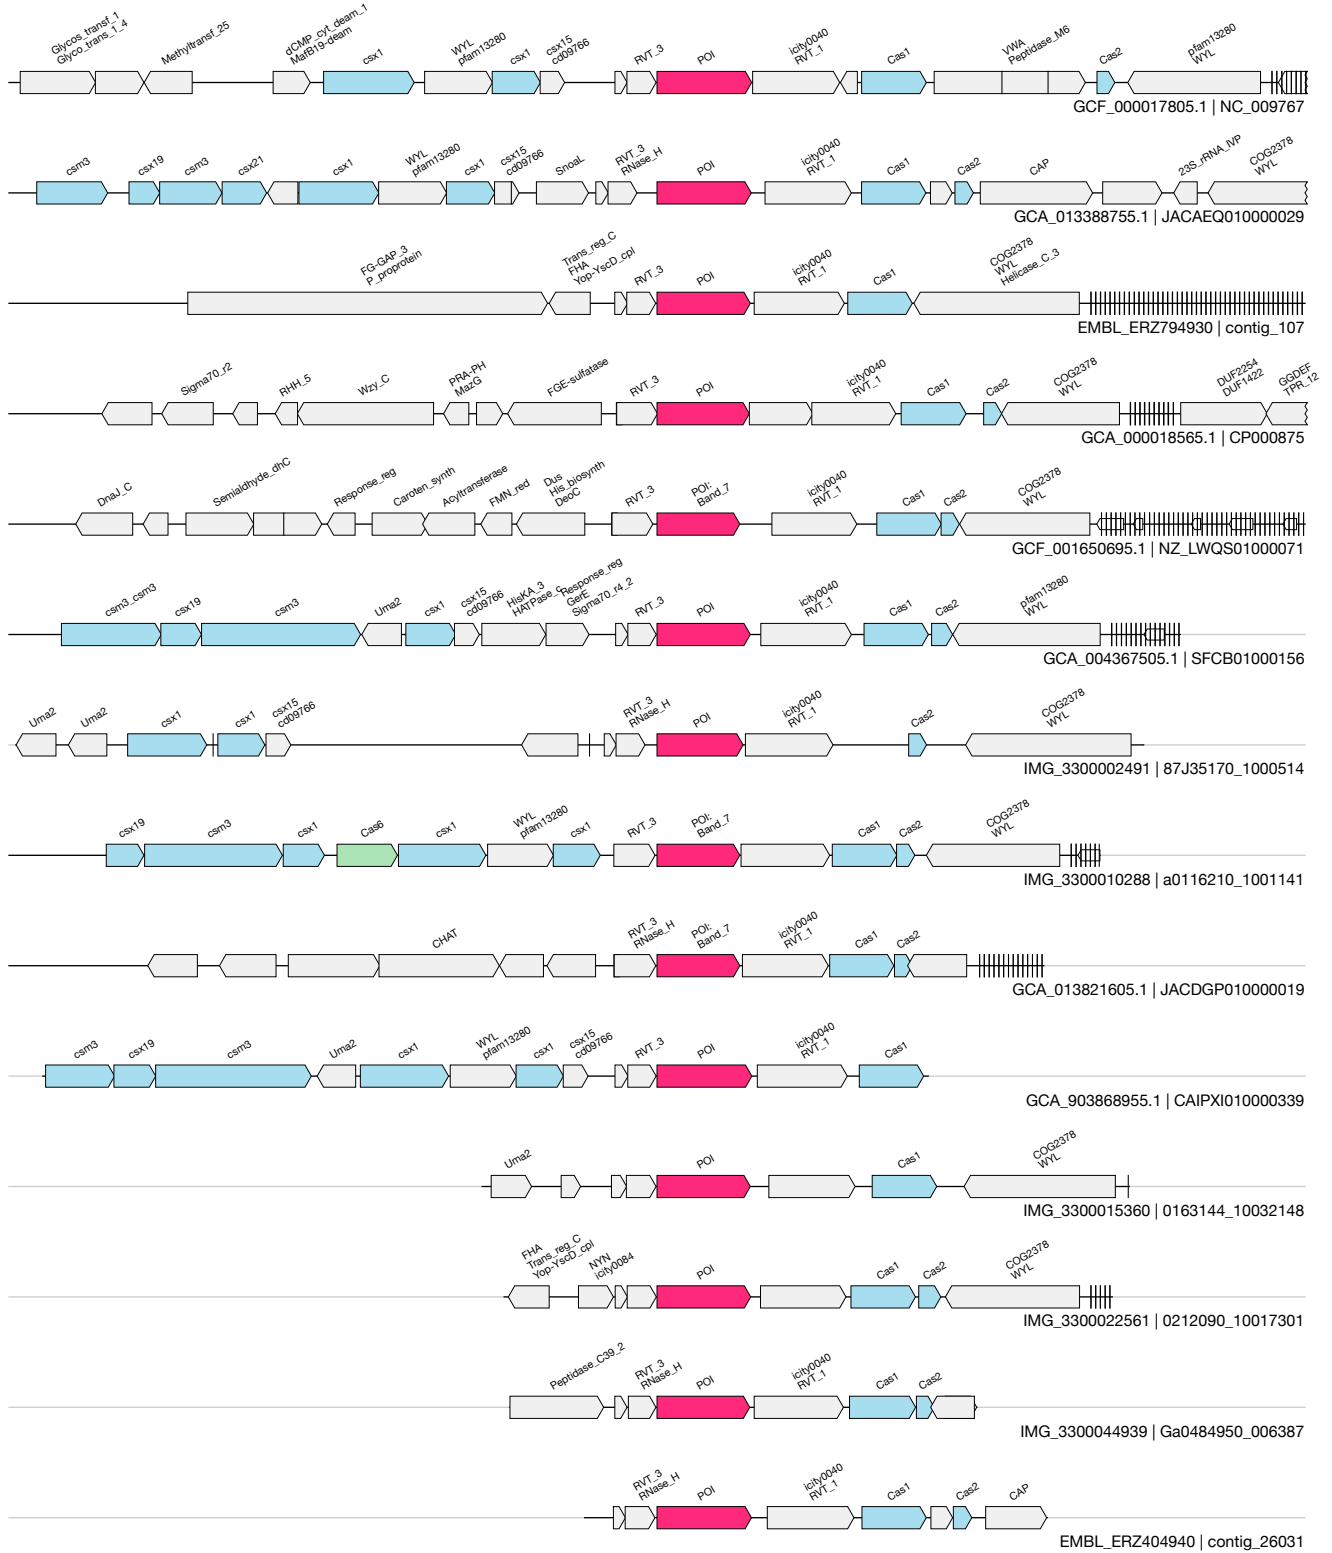

1kb

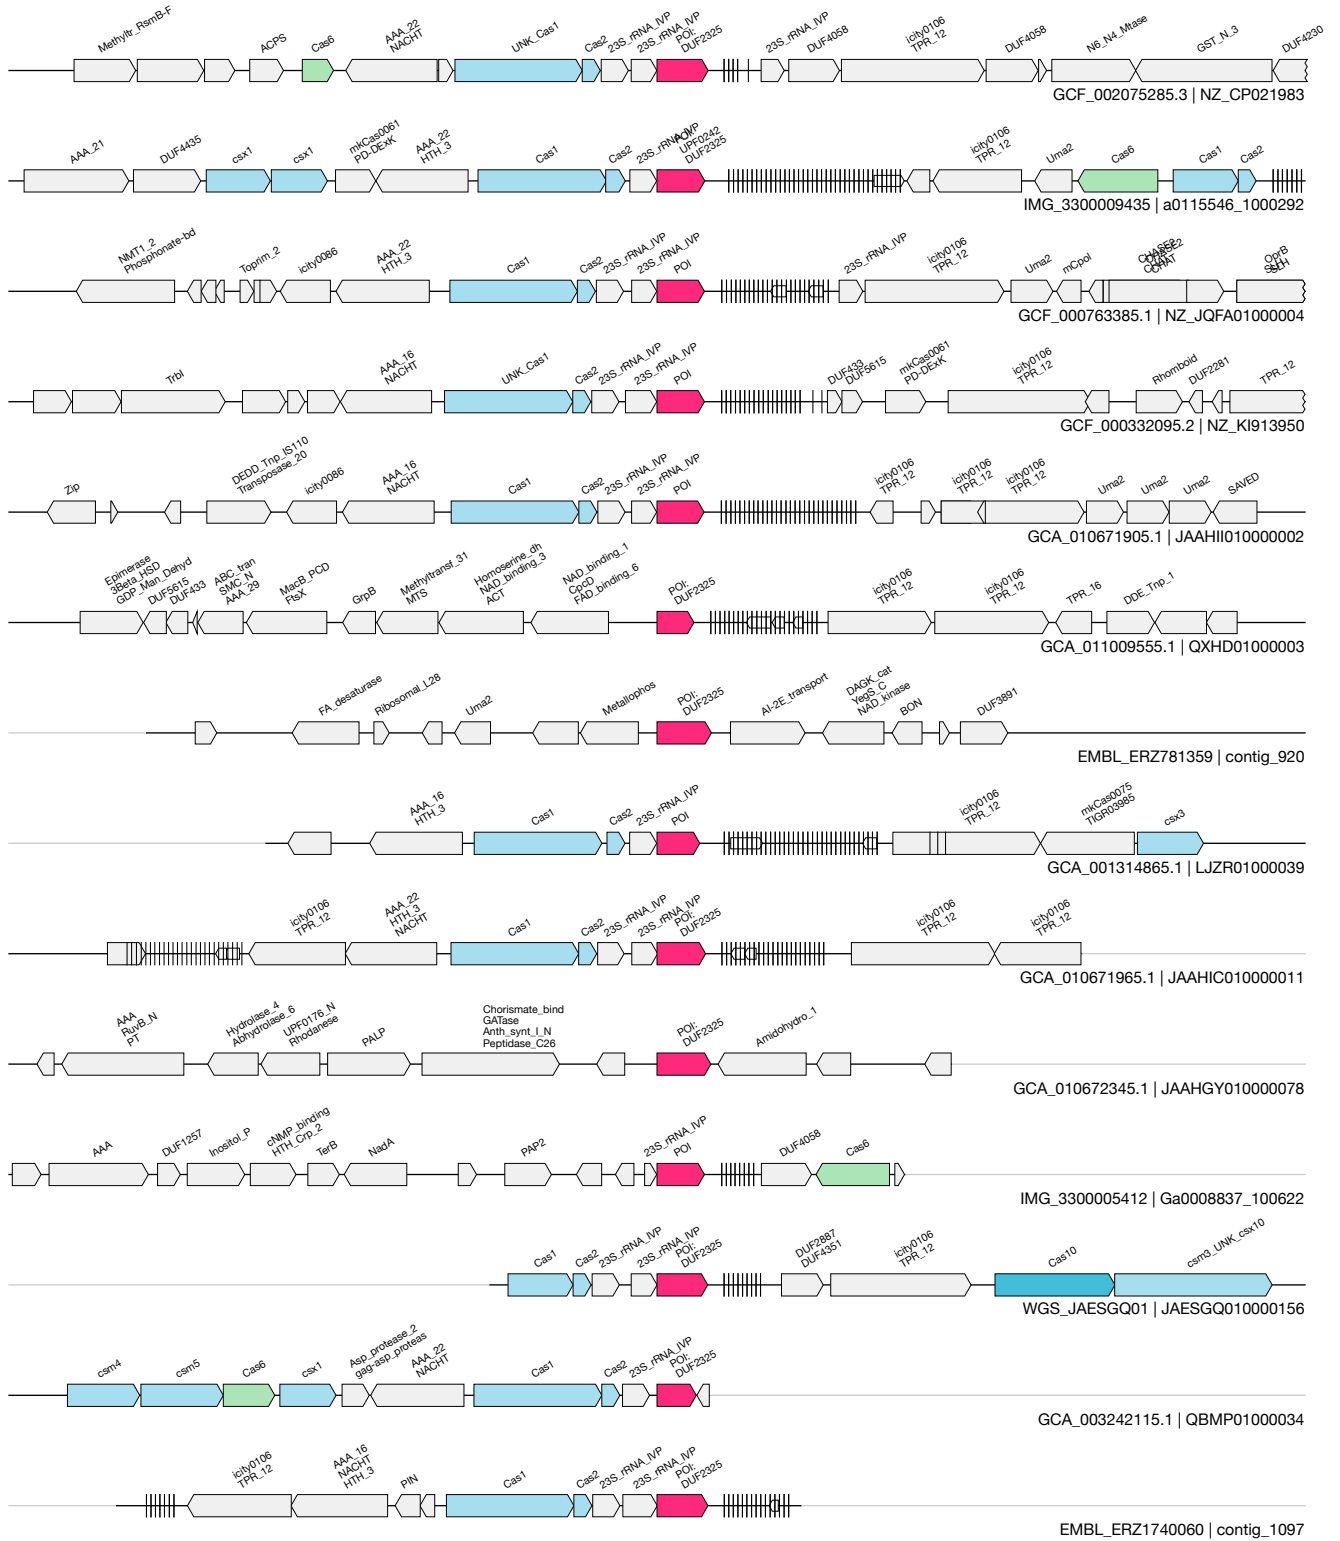

1kb

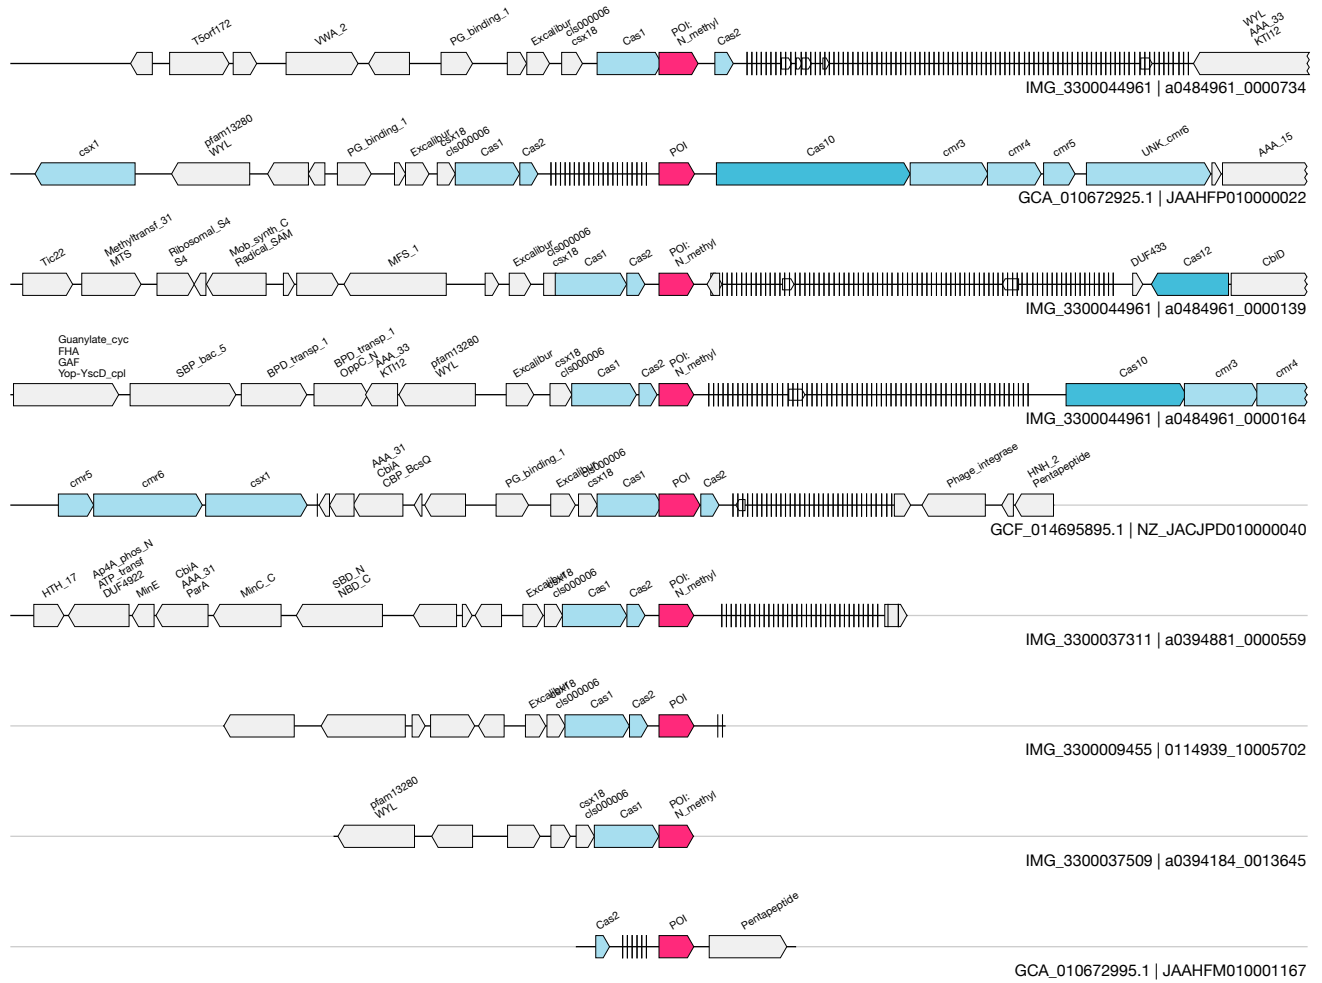

1kb



AI

UAS-17  
Acquisition

(Tbf2)

13 / 32.9

IMG\_3300009499&&0114930\_10001113&&3299\_5312\_-1

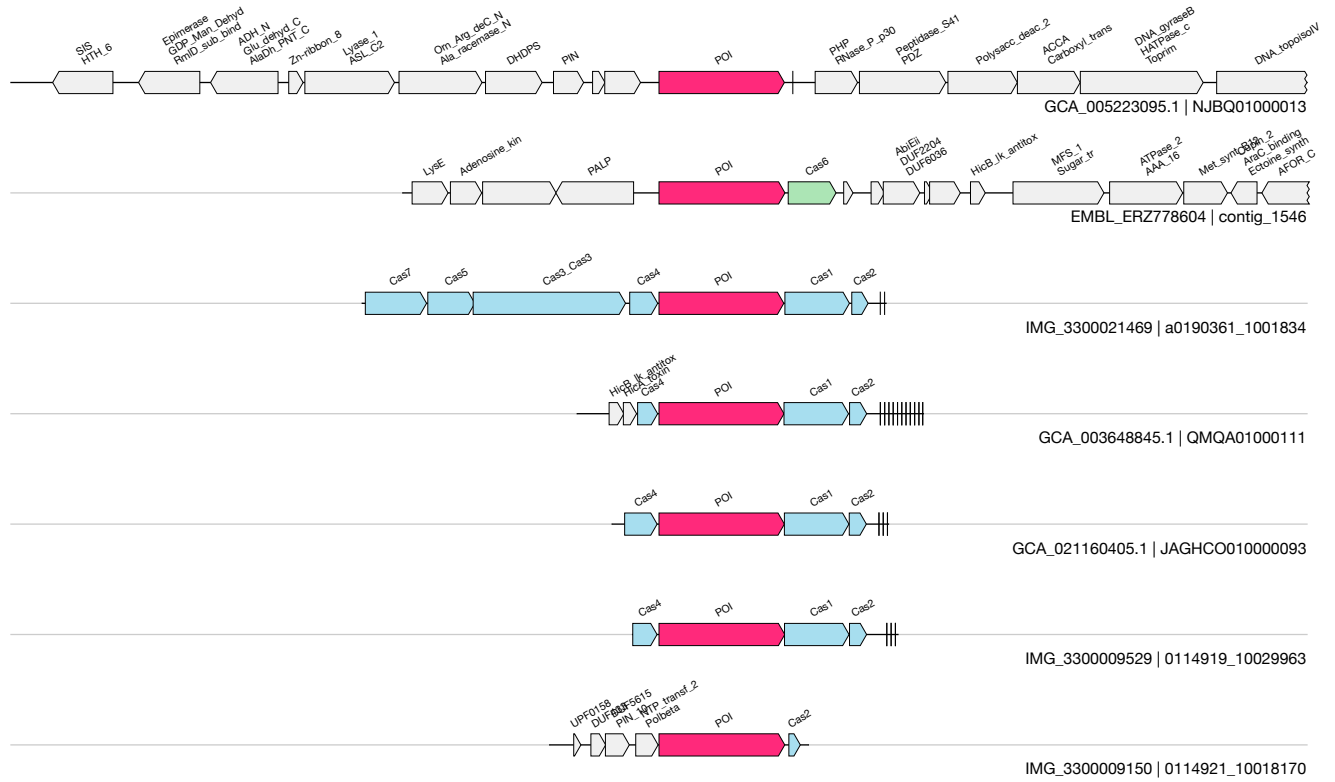

1kb

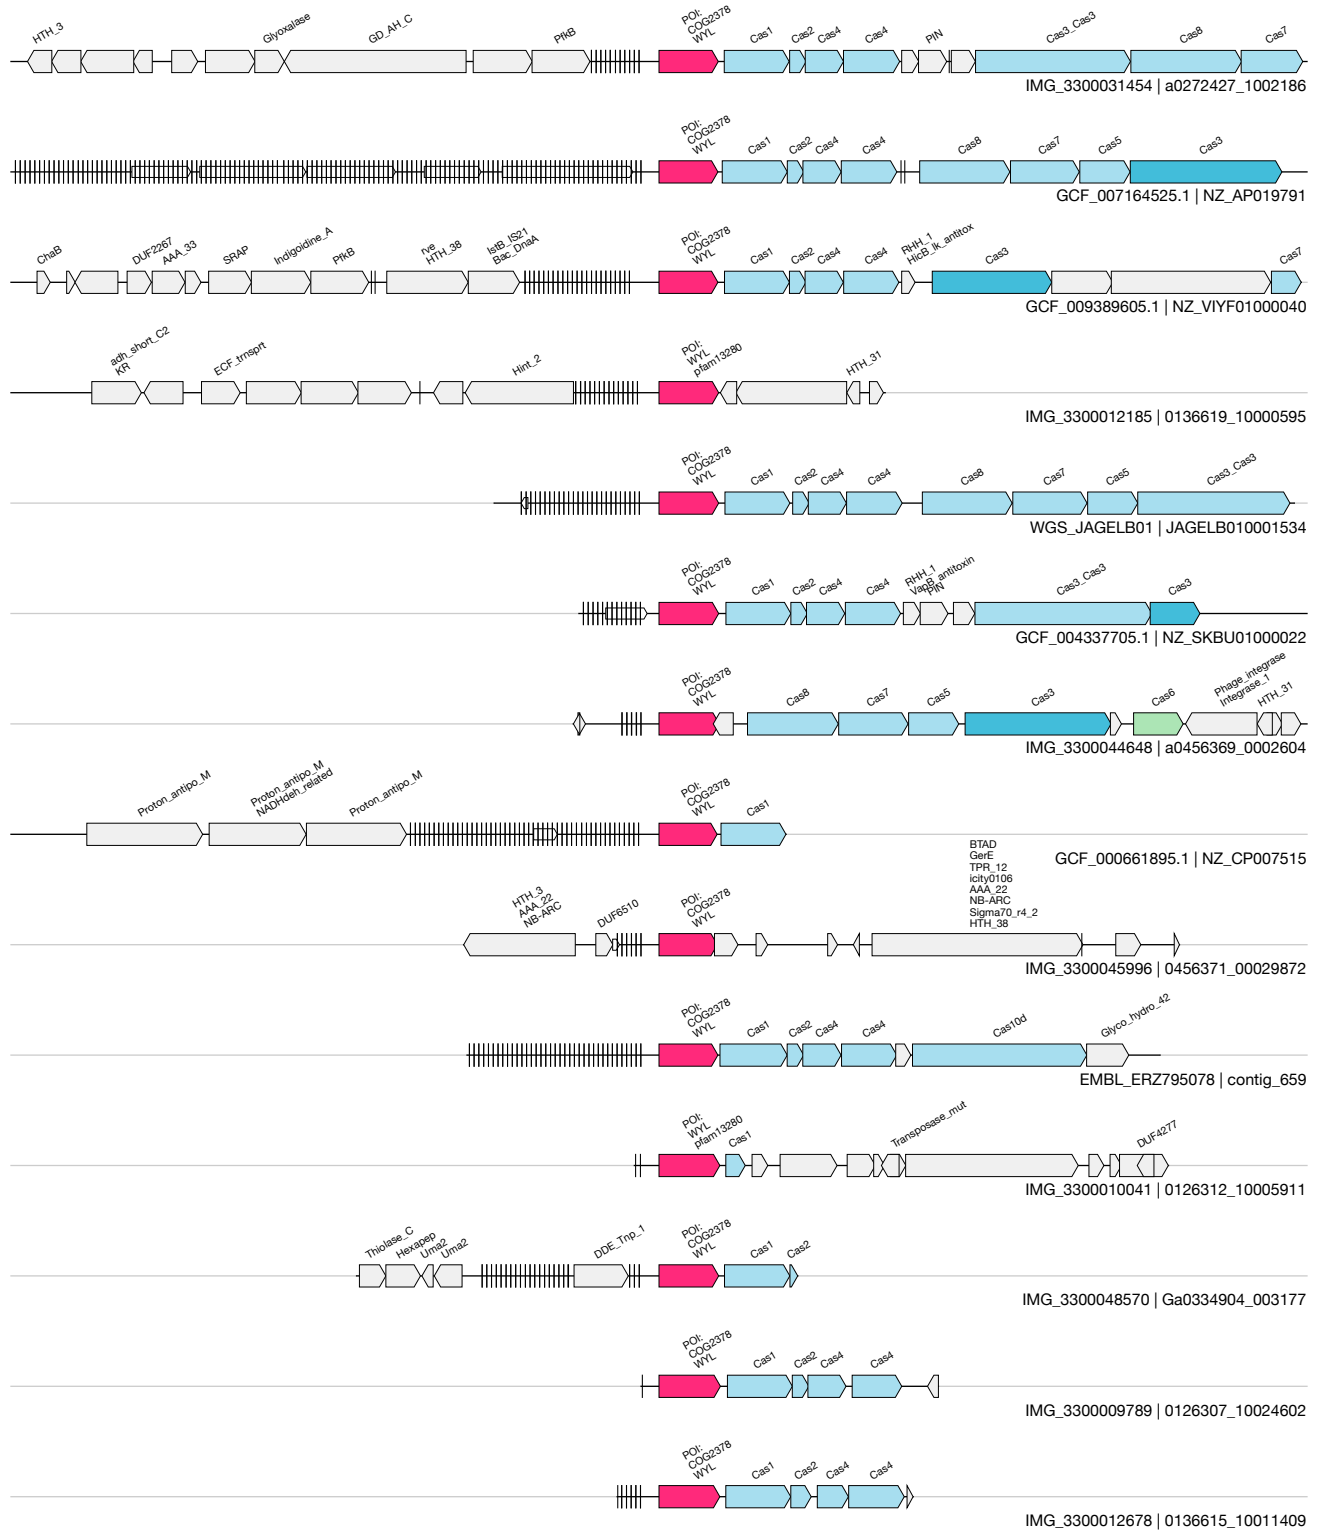

1kb

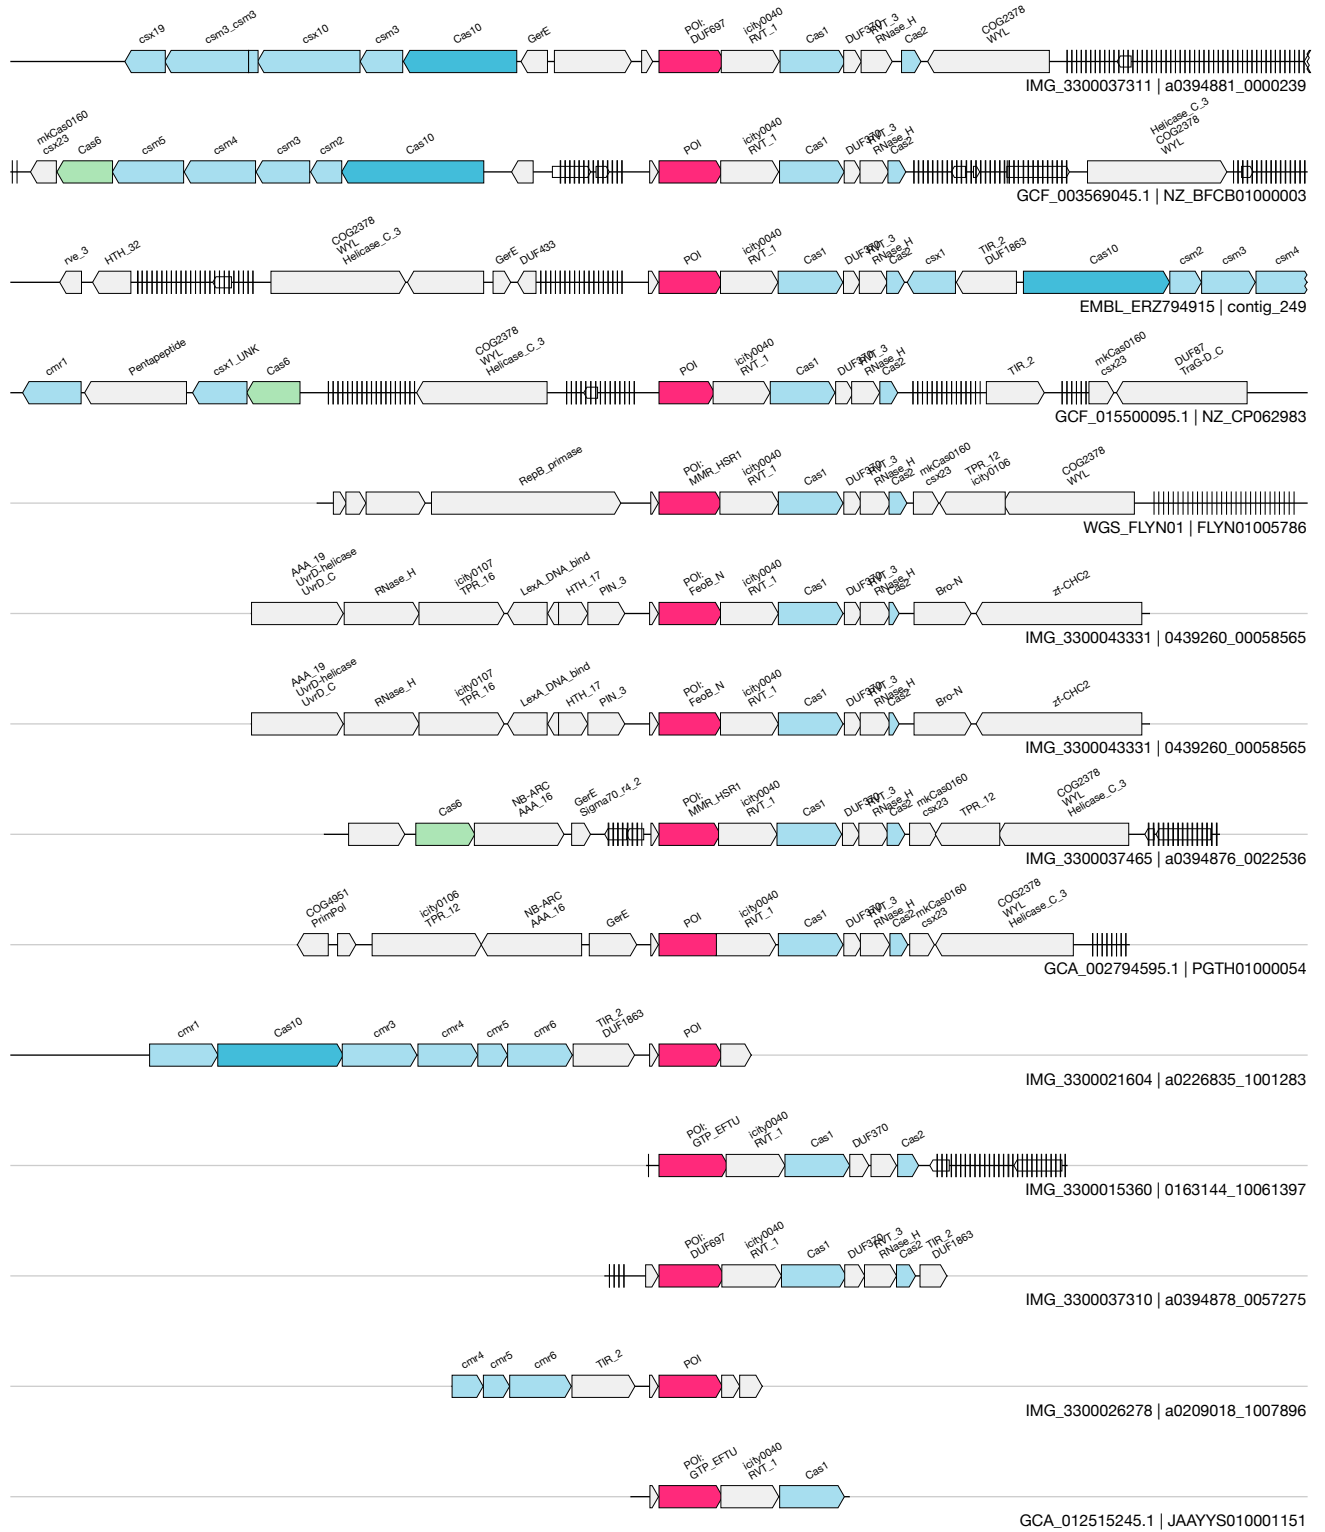

1kb



IMG\_3300026484&&a0256837\_1016836&&561\_990\_-1

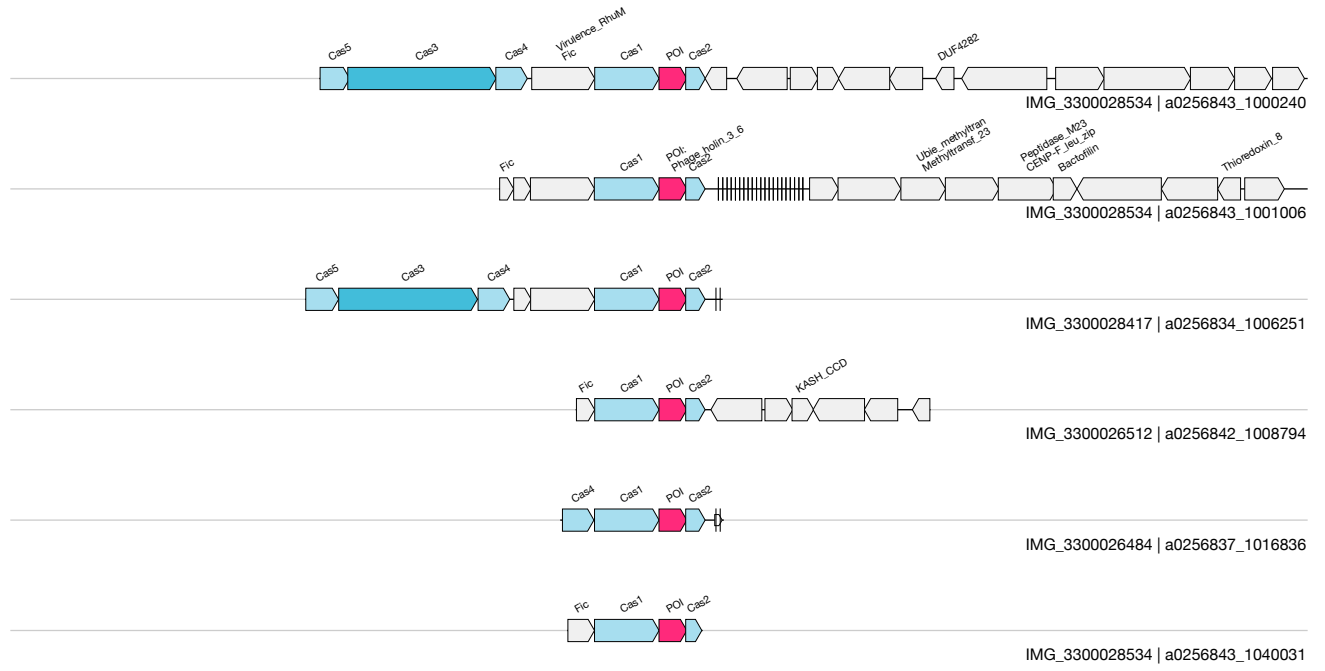

1kb

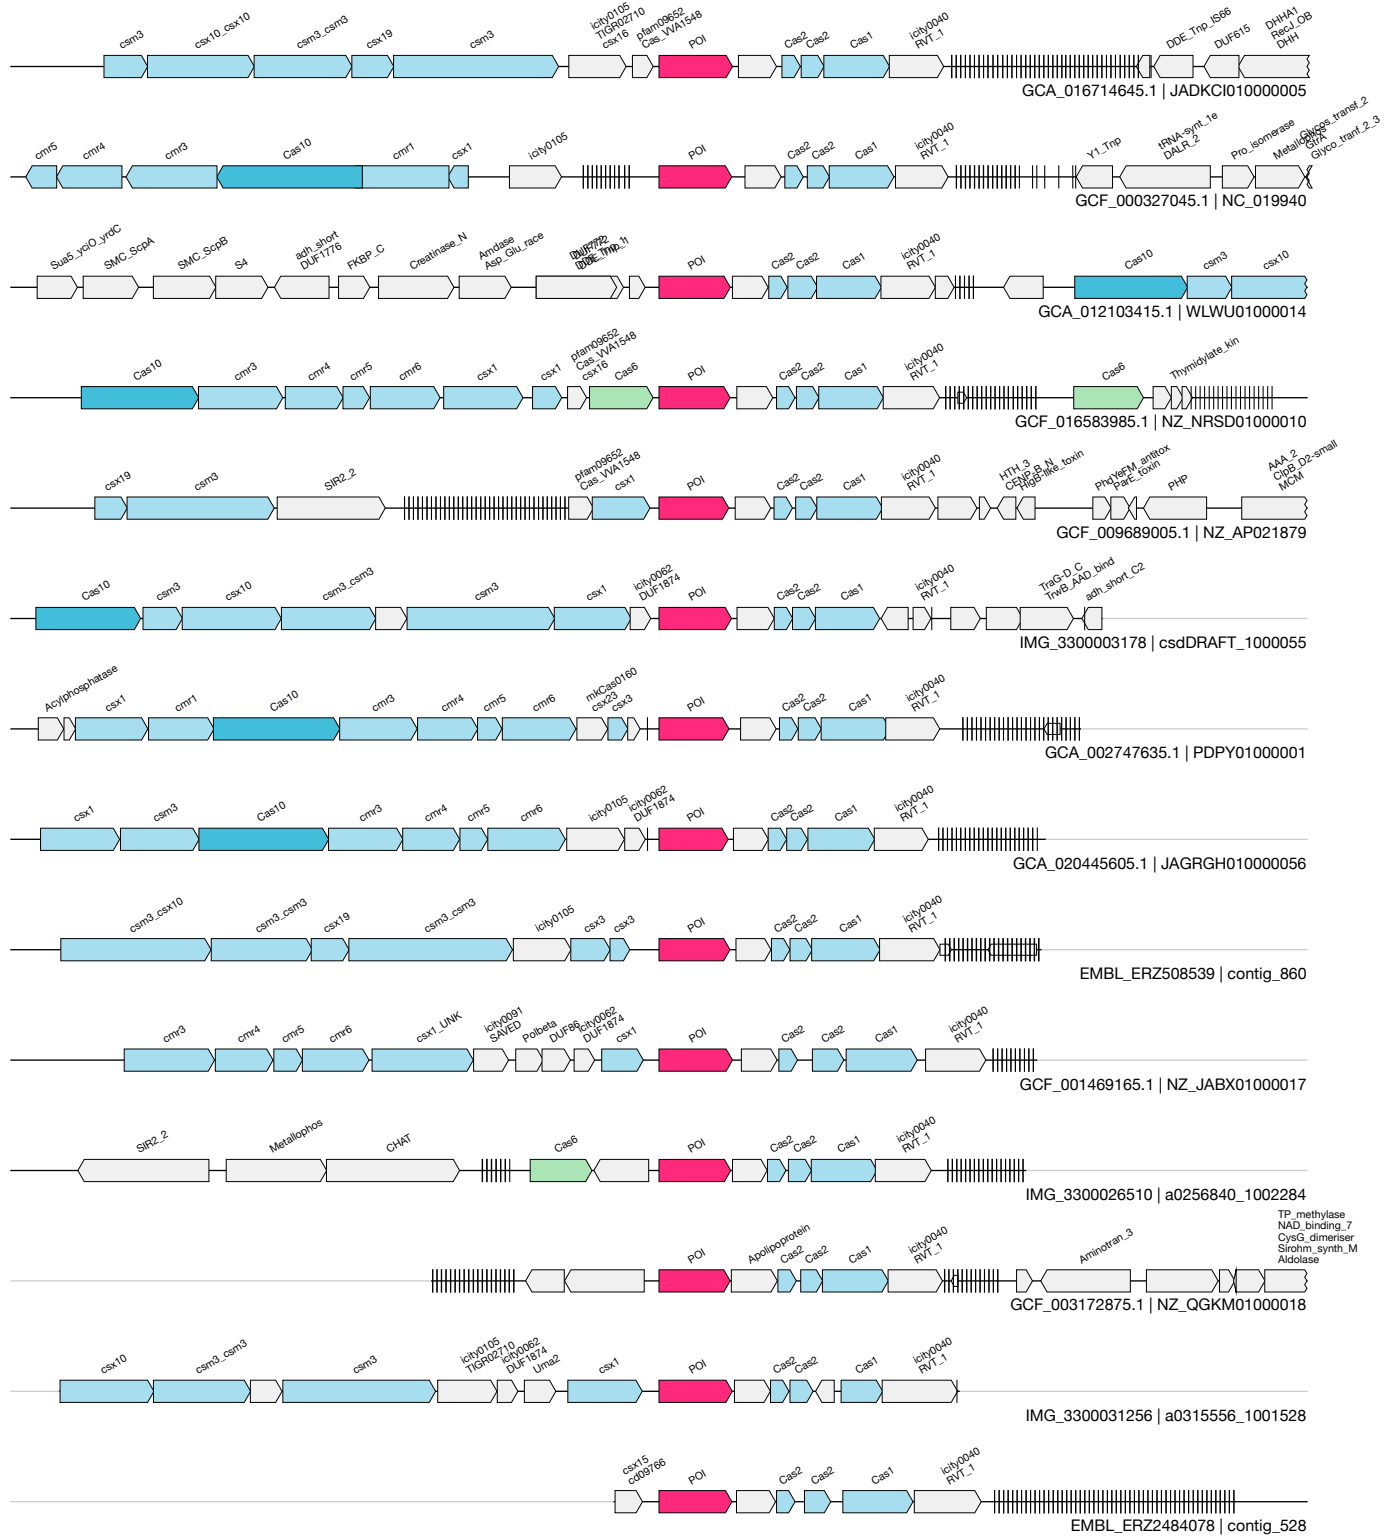

1kb

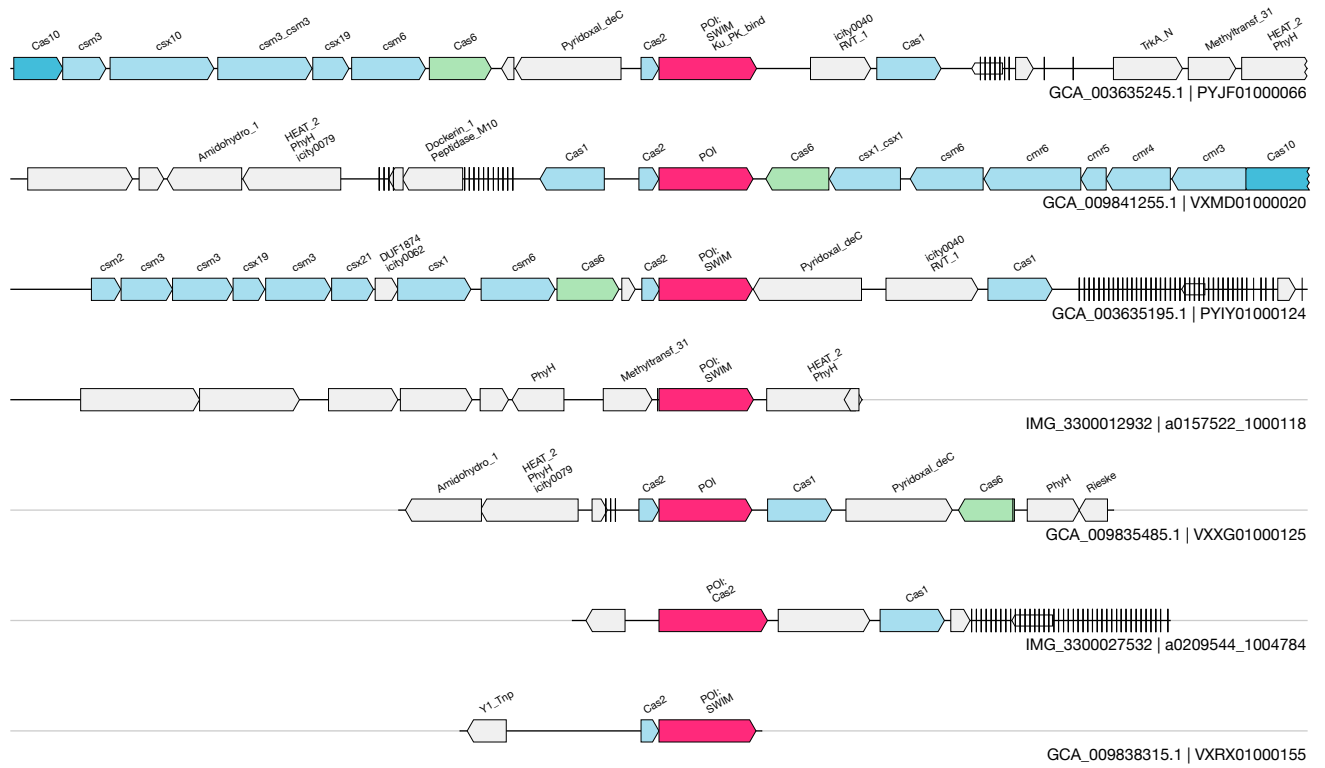

1kb

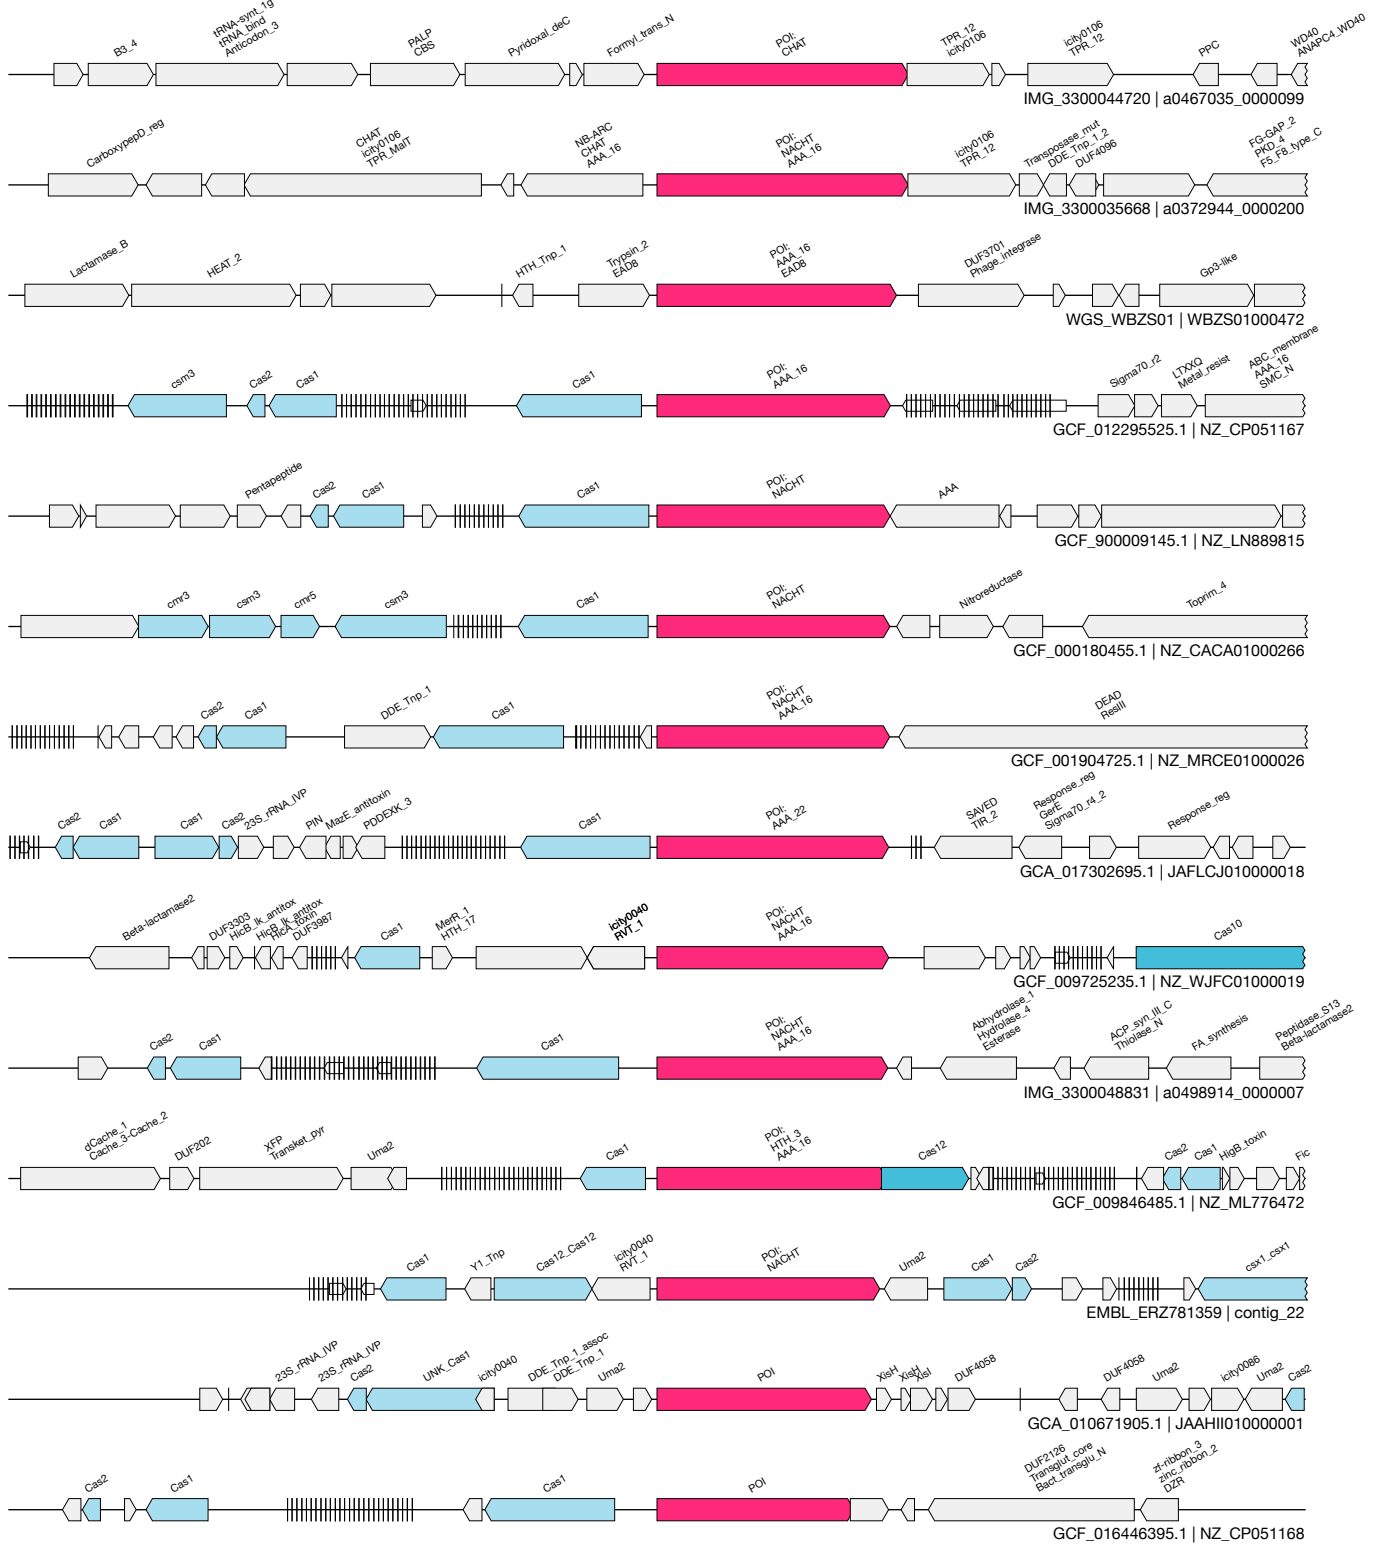

1kb



# AQ

**UAS-16**  
Acquisition

**(DUF3761)**

9 / 12.0

IMG\_3300037311&a0394881\_0014120&&7964\_8594\_-1

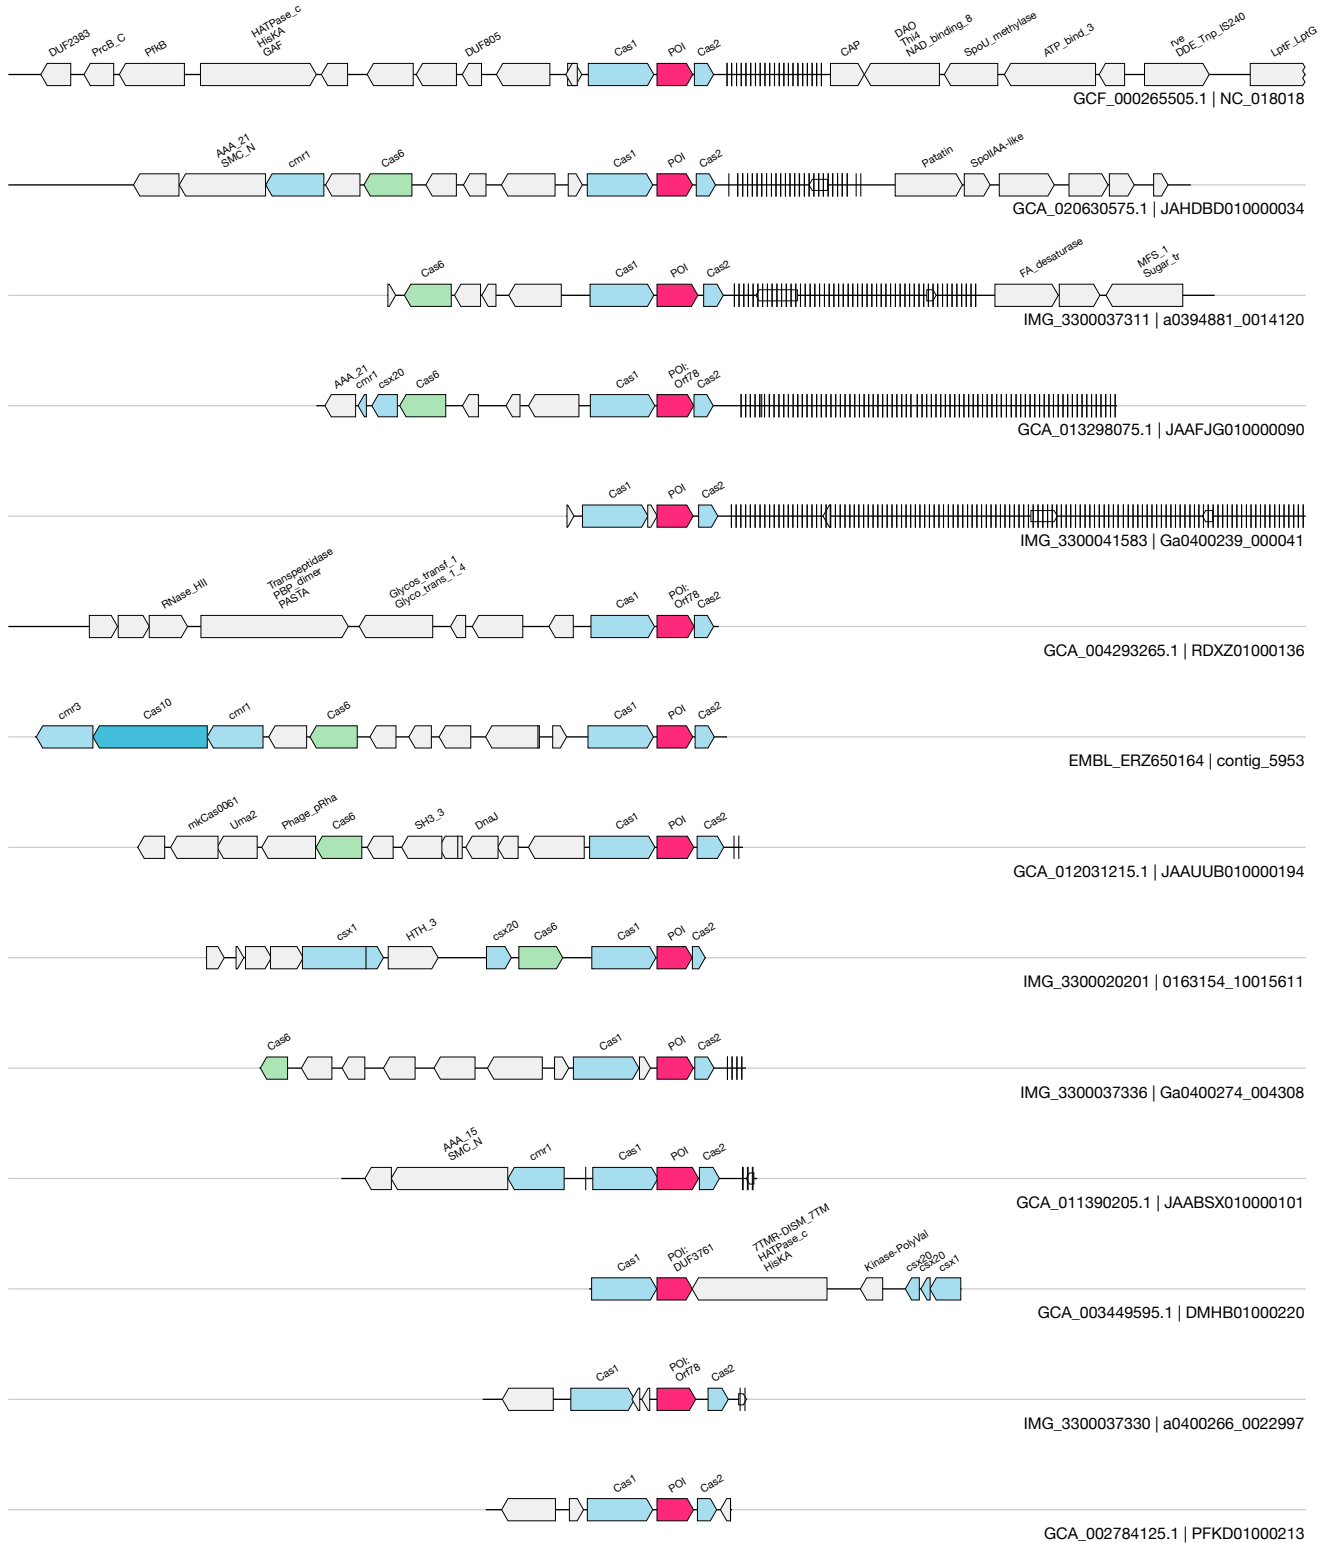

1kb

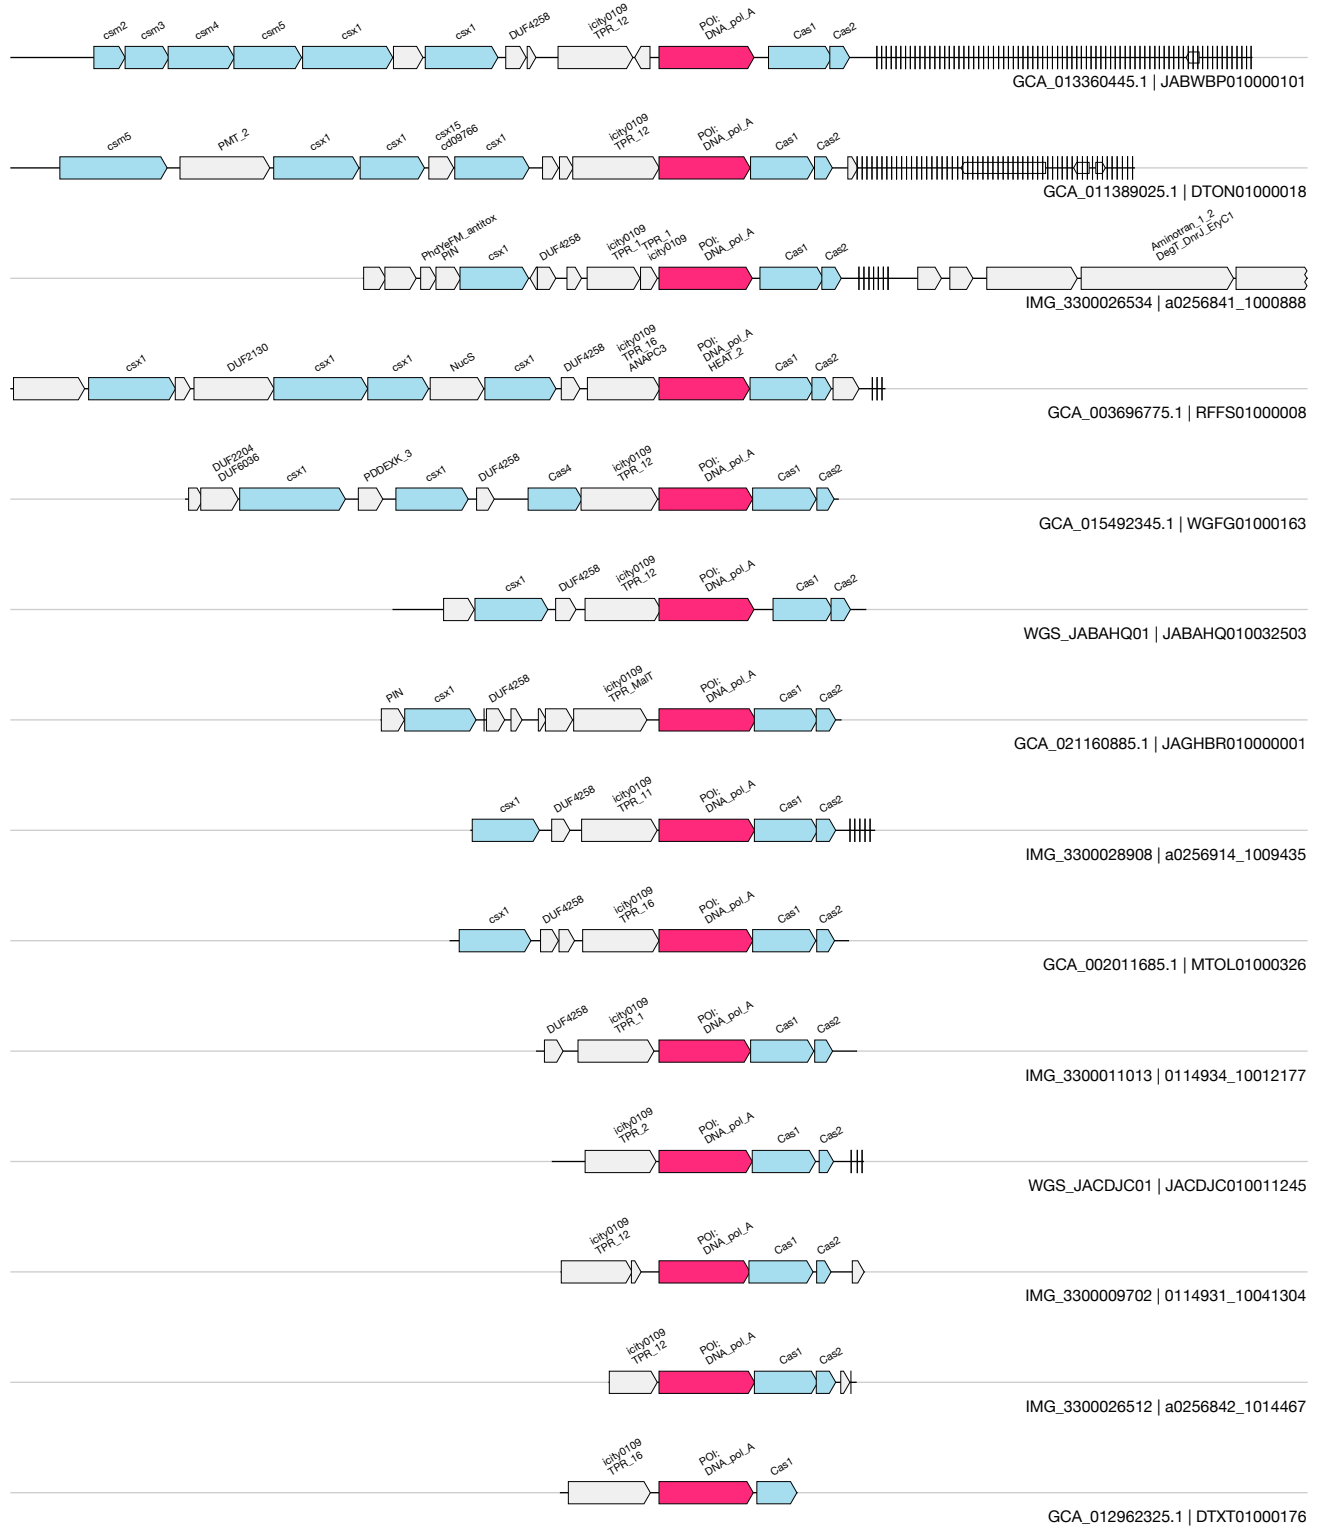

1kb

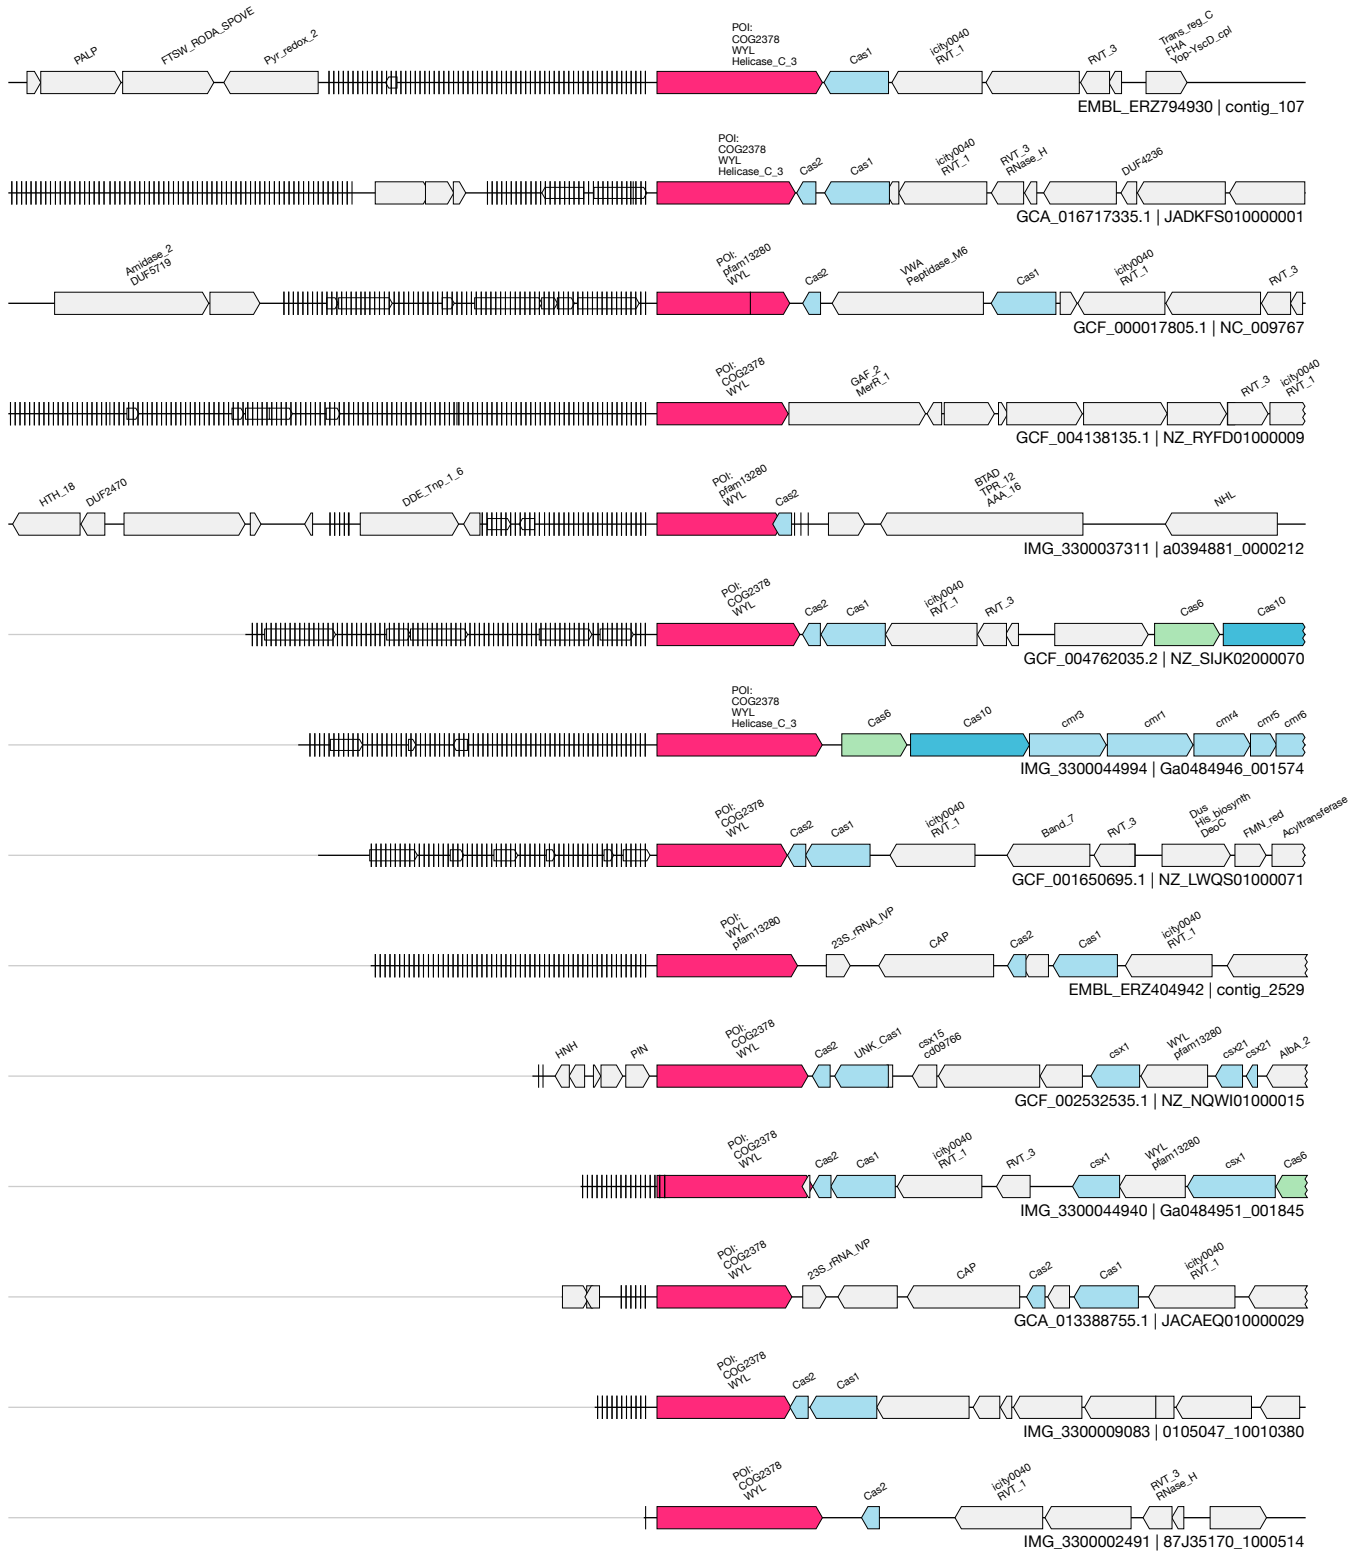

1kb

AT

UAS-50  
CARF

(CARF\_ReIA)  
EMBL\_ERZ404942&&contig\_42542&&228\_1605\_-1

8 / 11.5

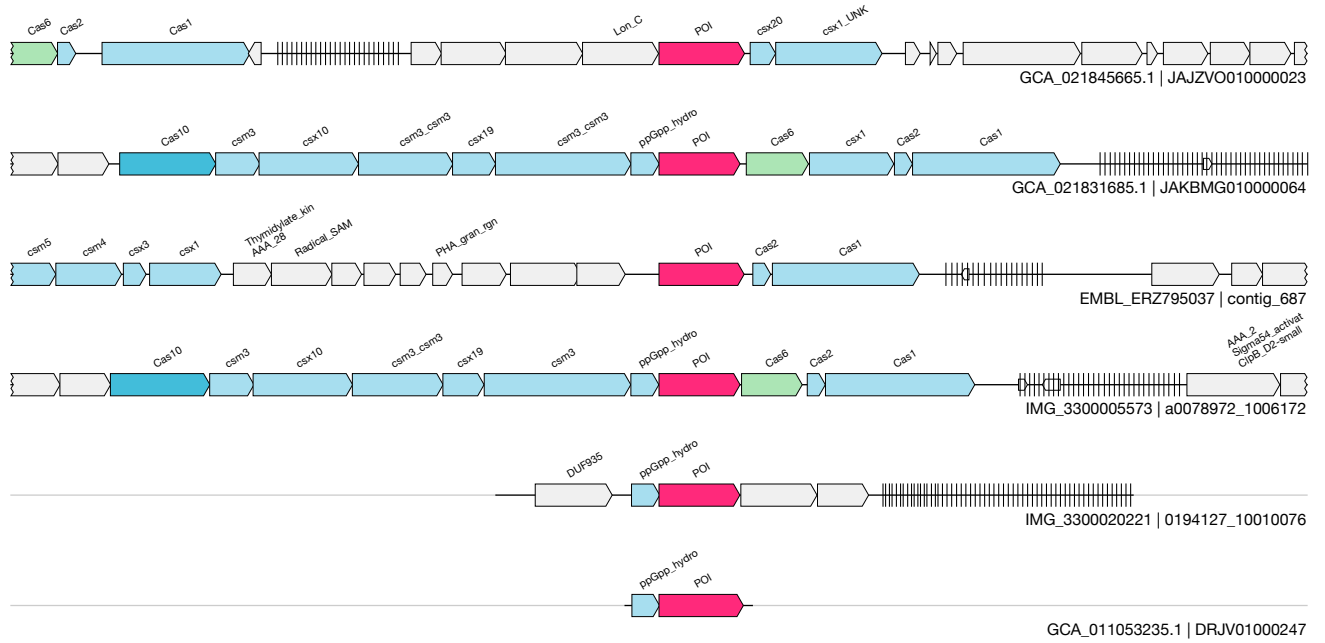

1kb

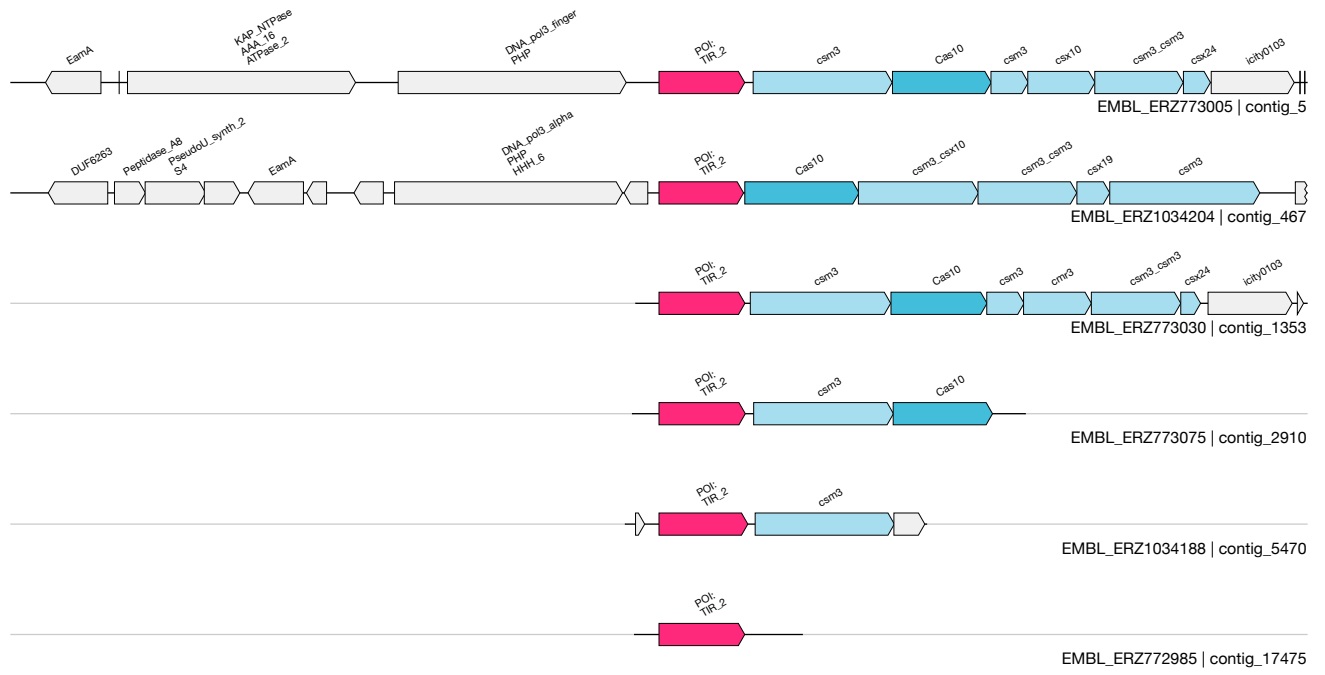

1kb

AV

UAS-52  
CARF

(CARF\_Sigma)  
EMBL\_ERZ795034&&contig\_47960&&1548\_2448\_-1 extraction

N/A

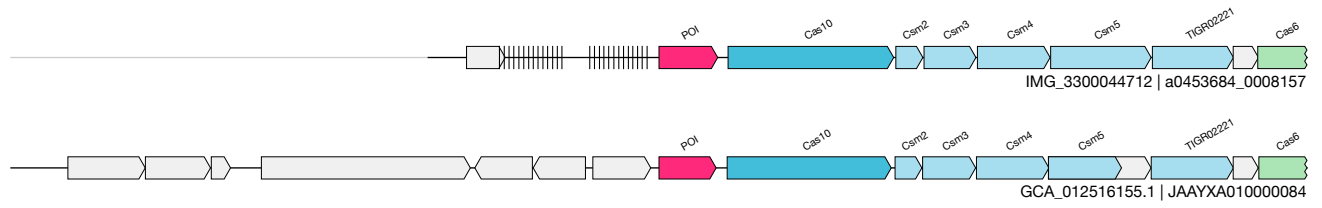

1kb

AW

UAS-53  
CARF

(CARF\_DUF859 + many nearby genes)  
EMBL\_ERZ894180&&contig\_692&&8871\_11661\_-1 extraction

4 / 5.0

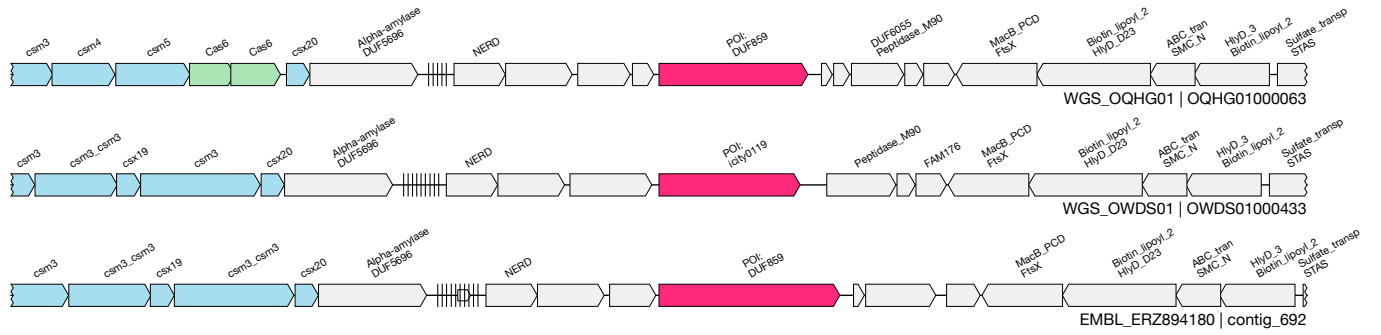

1kb

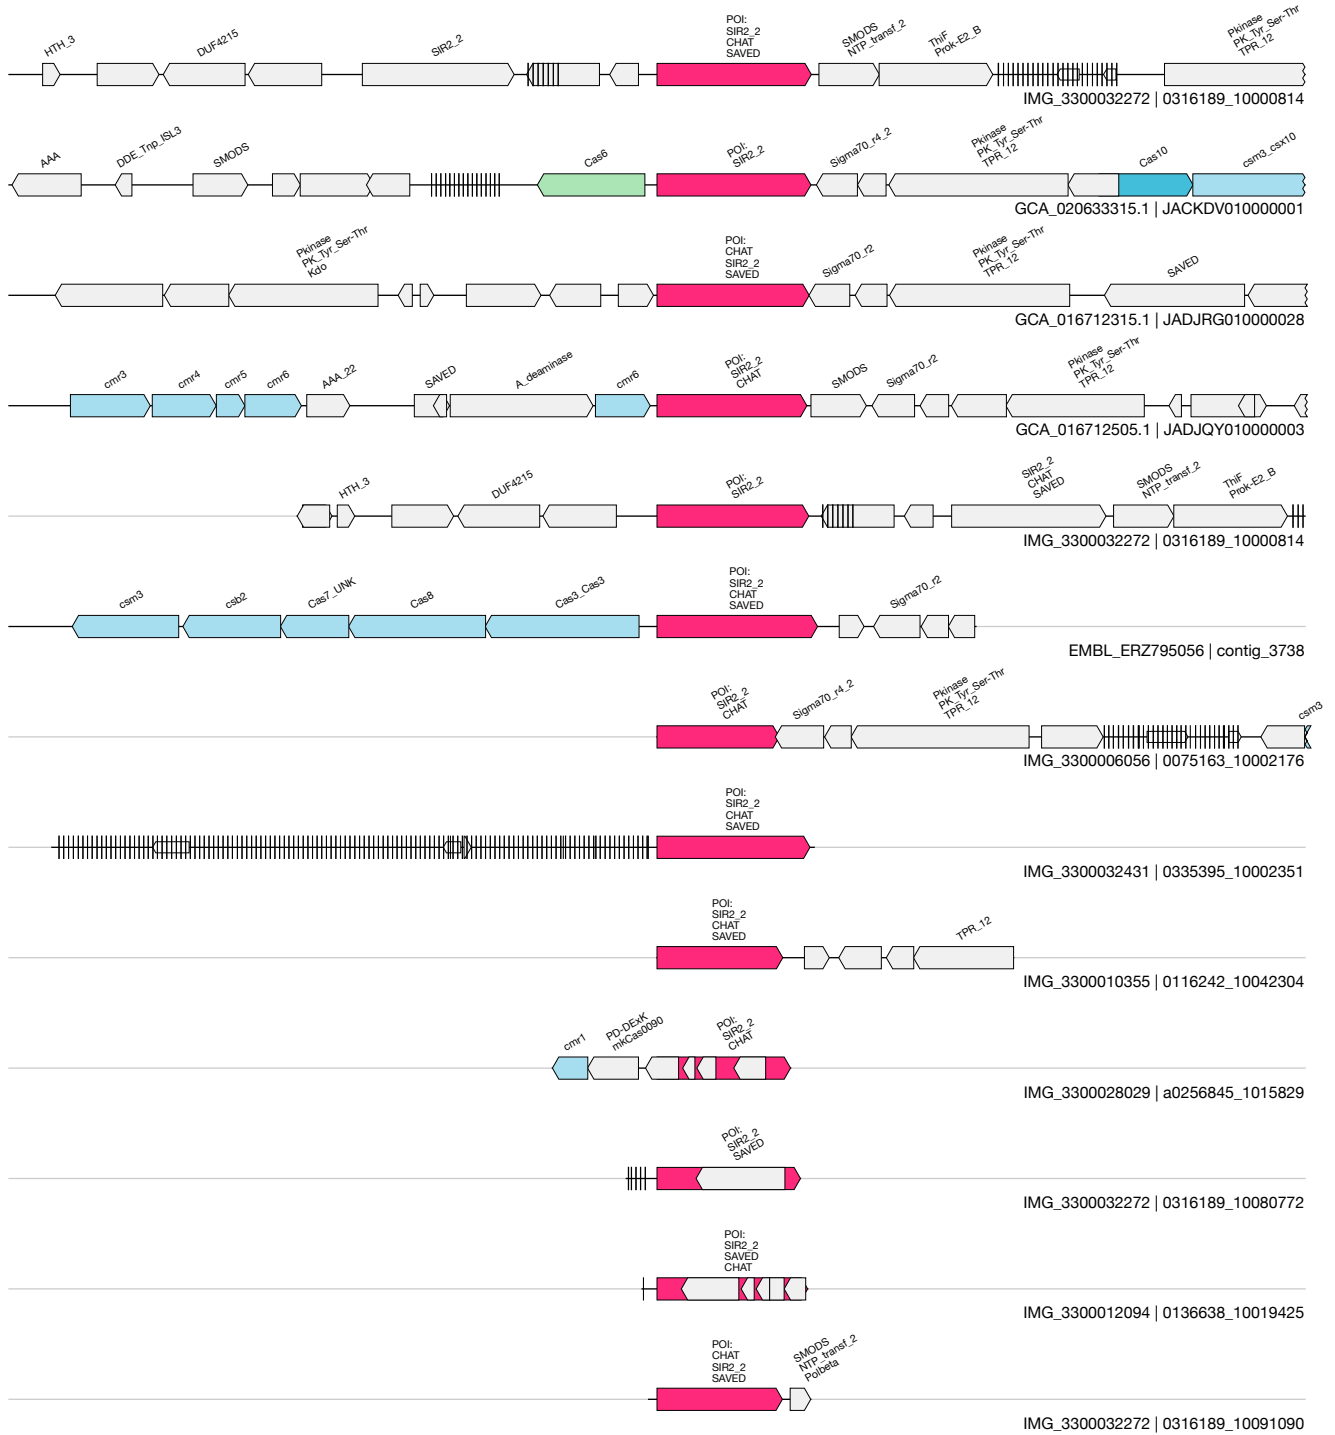

1kb



GCA\_020634195.1&&JACKCE010000043&&1971\_2784\_-1

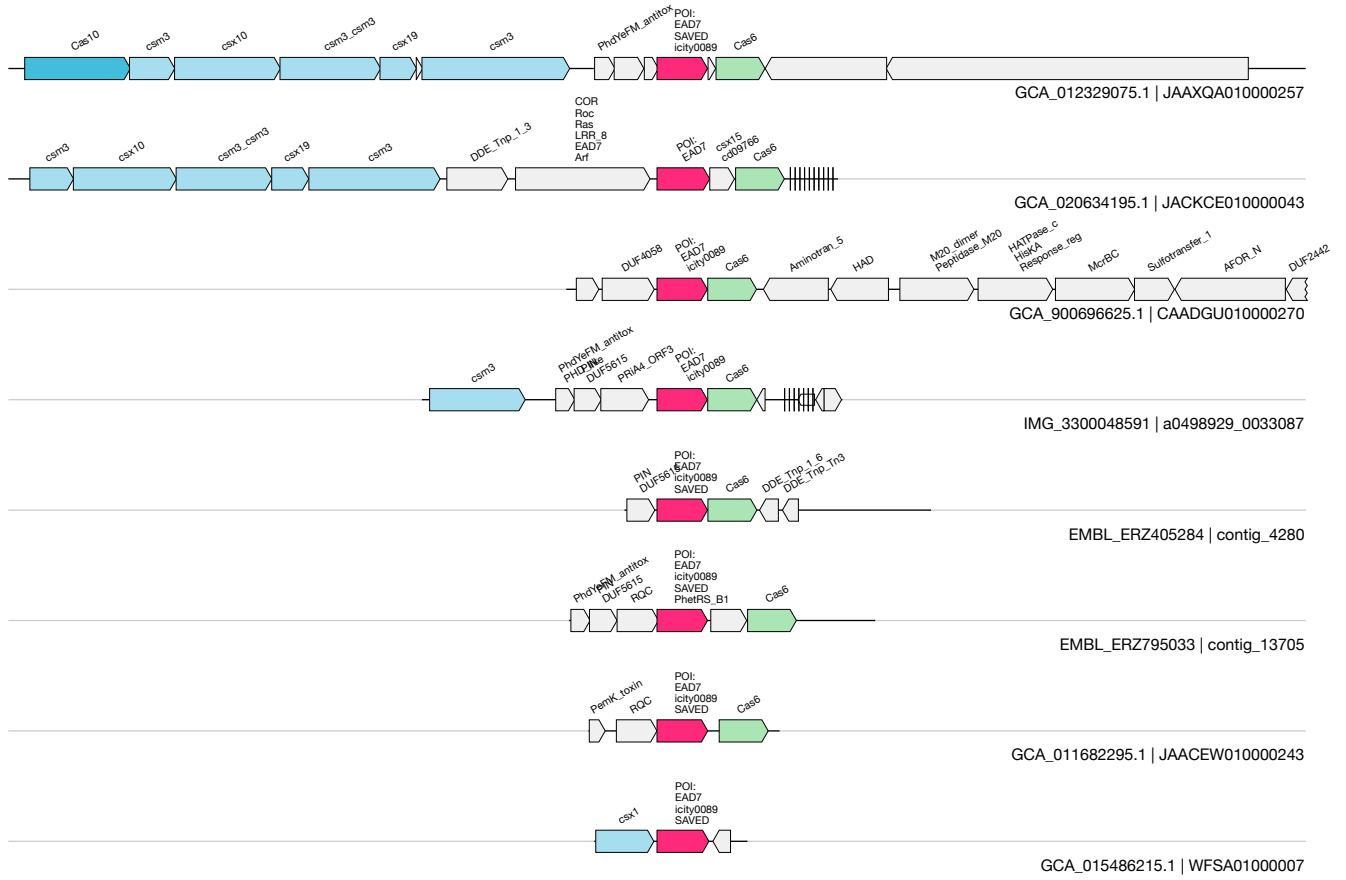

1kb

AZ

UAS-56  
CARF

(CARF\_DUF859\_ATPase + many nearby genes)  
GCA\_900541305.1&&UQJJ01000039&&1337\_4901\_1 extraction

7 / 8.7

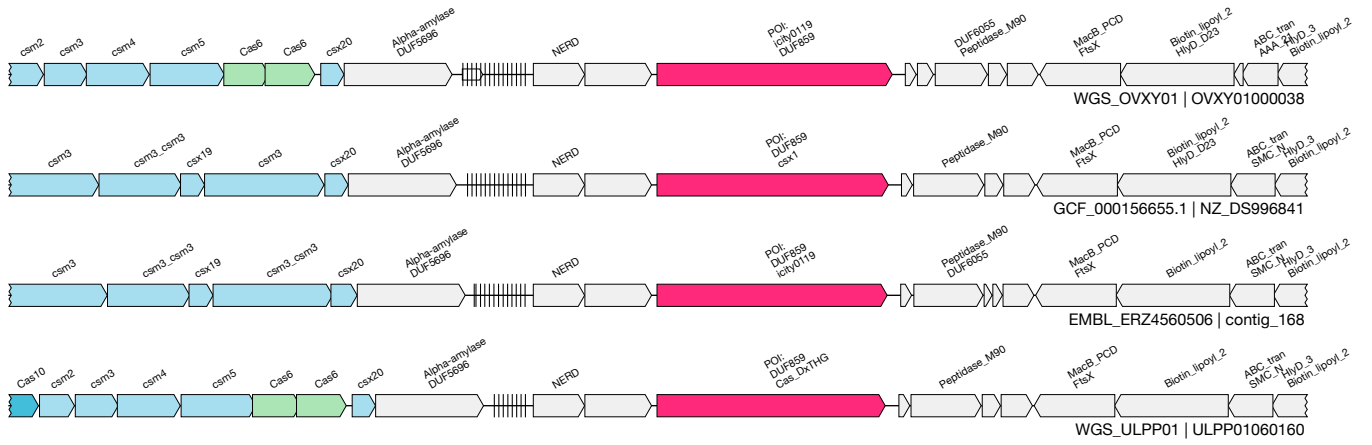

1kb

BA

UAS-57  
CARF

(SAVED TIR)

9 / 18.6

GCF\_000024805.1&&NC\_013440&&7674710\_7676006\_1

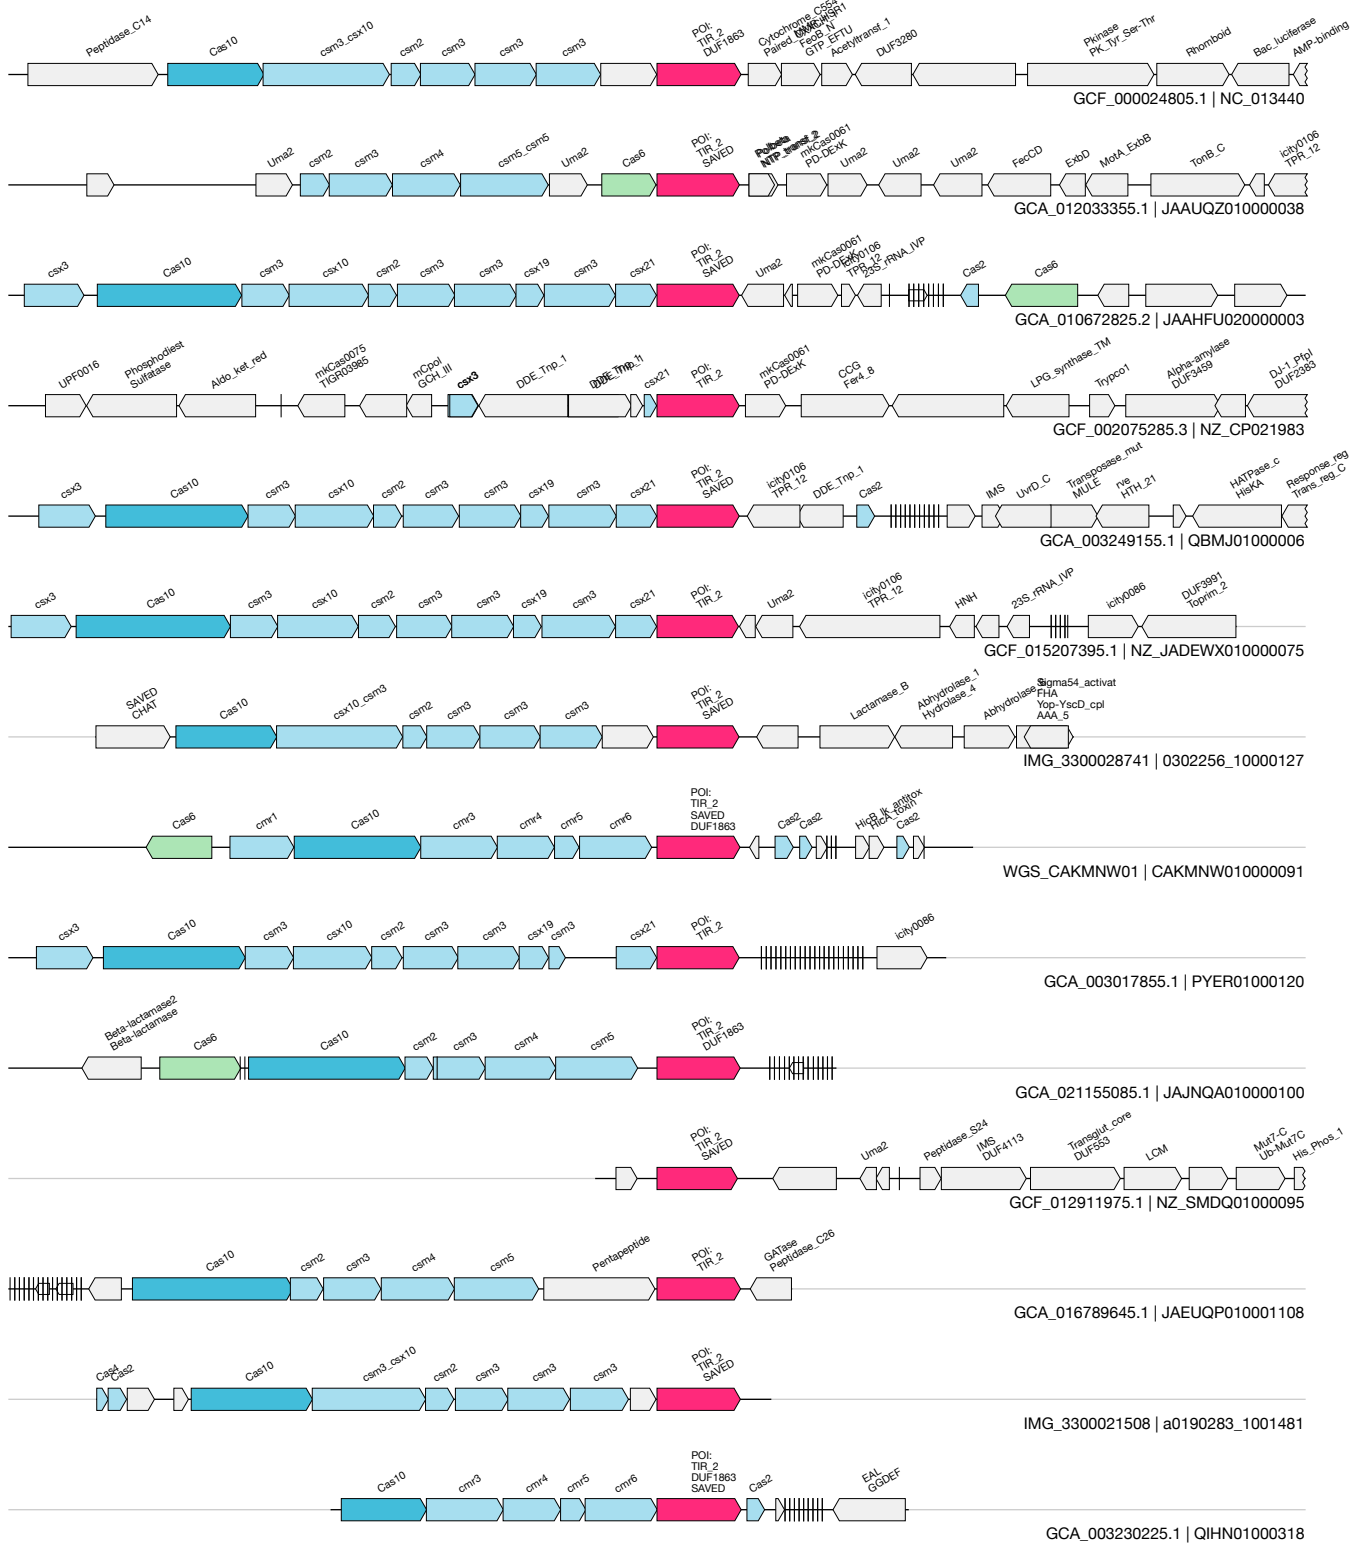

1kb

BB

UAS-58  
CARF

(CARF\_ATPase\_HTH + RNAPol)  
GCF\_000224065.1&&NZ\_AFWT01000006&&121441\_122968\_1 extraction 2

N/A

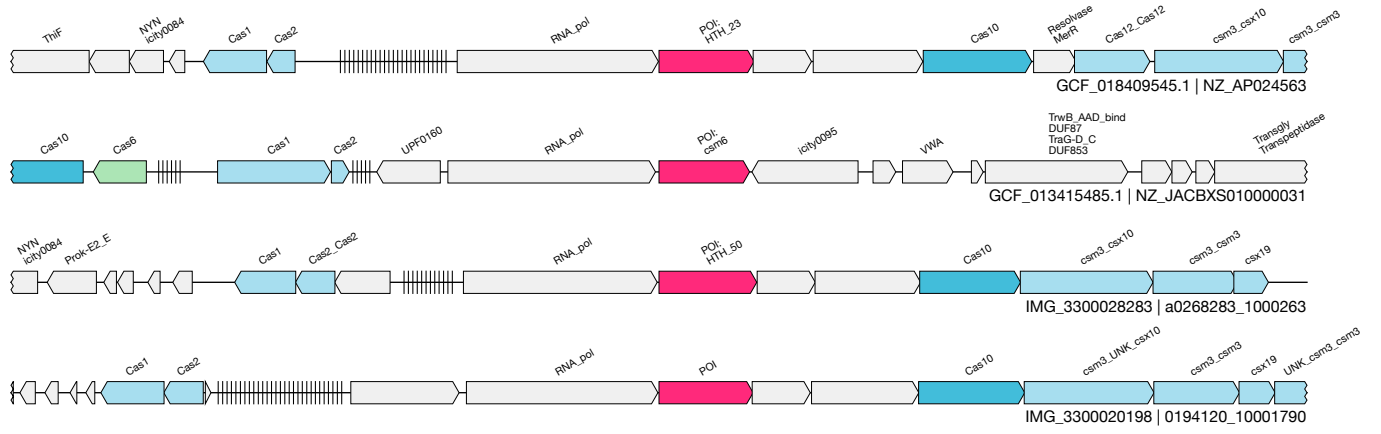

1kb

BC

**UAS-59**  
CARF

**(CARF\_CYTH\_HD)**  
IMG\_3300002498&&TOLCLC\_10008146&&3727\_6961\_-1 extraction

3 / 5.1

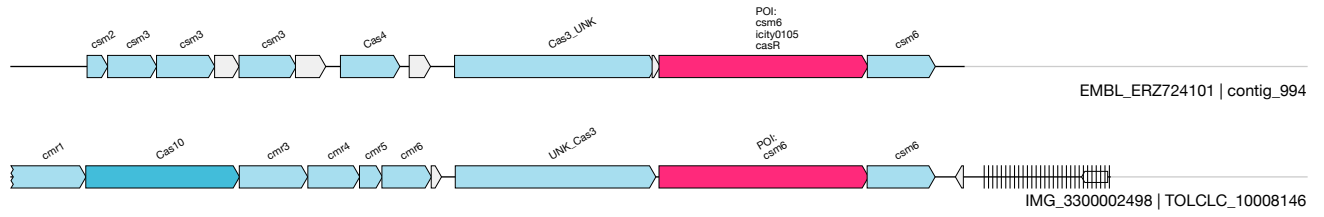

1kb

BD

UAS-60  
CARF

(CARF\_SIR2)

N/A

IMG\_3300009523&&a0116221\_1002542&&6420\_8025\_-1\_loci\_to\_order

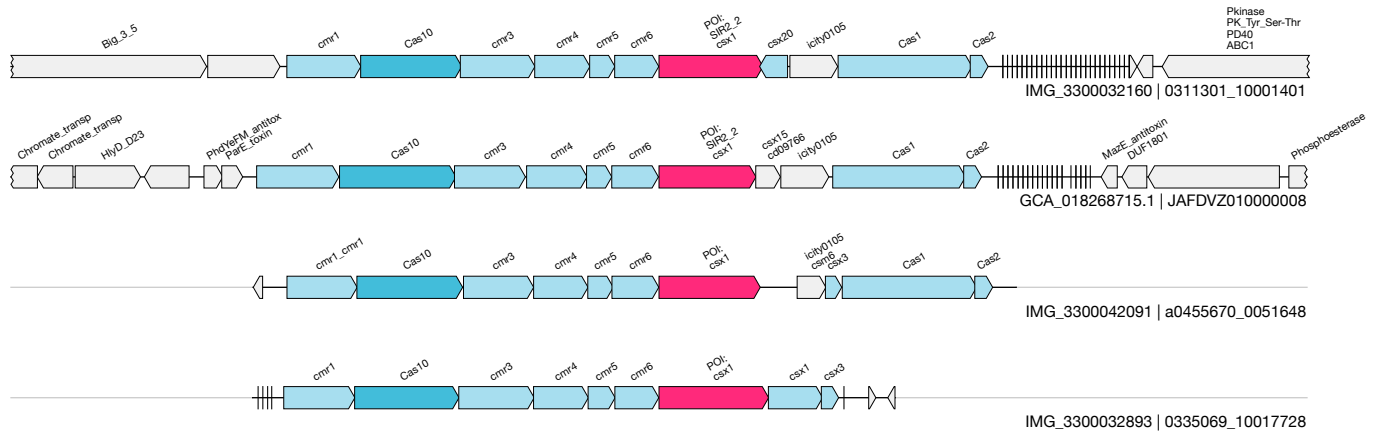

1kb

BE

UAS-61  
CARF

(CARF\_TIR\_Mrr)

11 / 15.3

IMG\_3300020198&&0194120\_10015339&&5702\_6689\_1 extraction

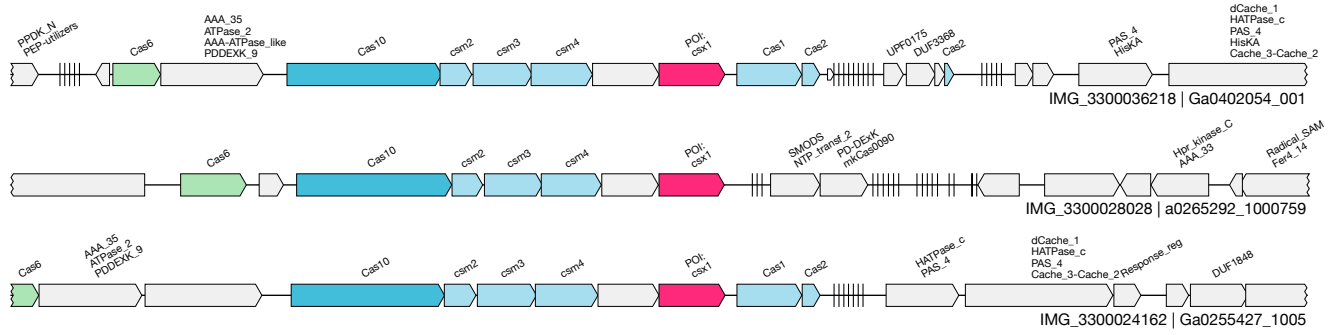

1kb

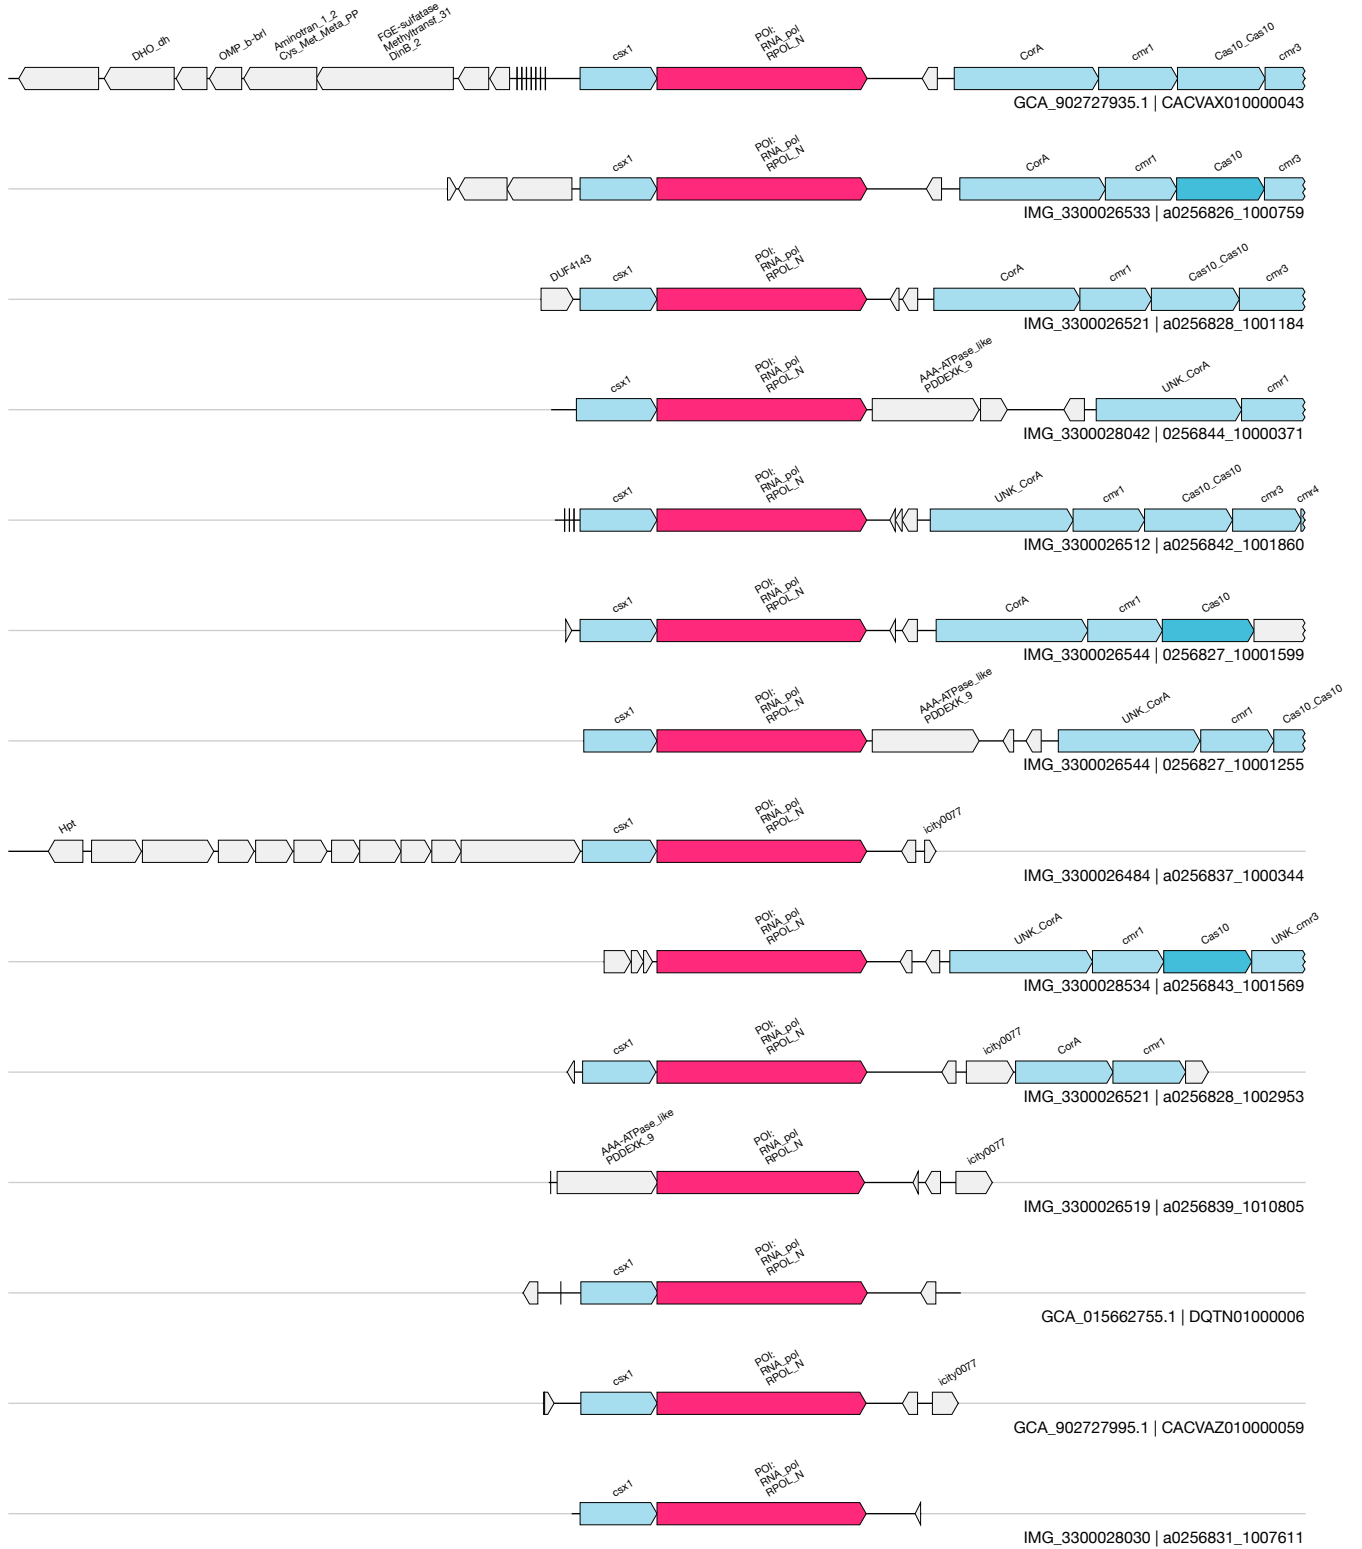

1kb



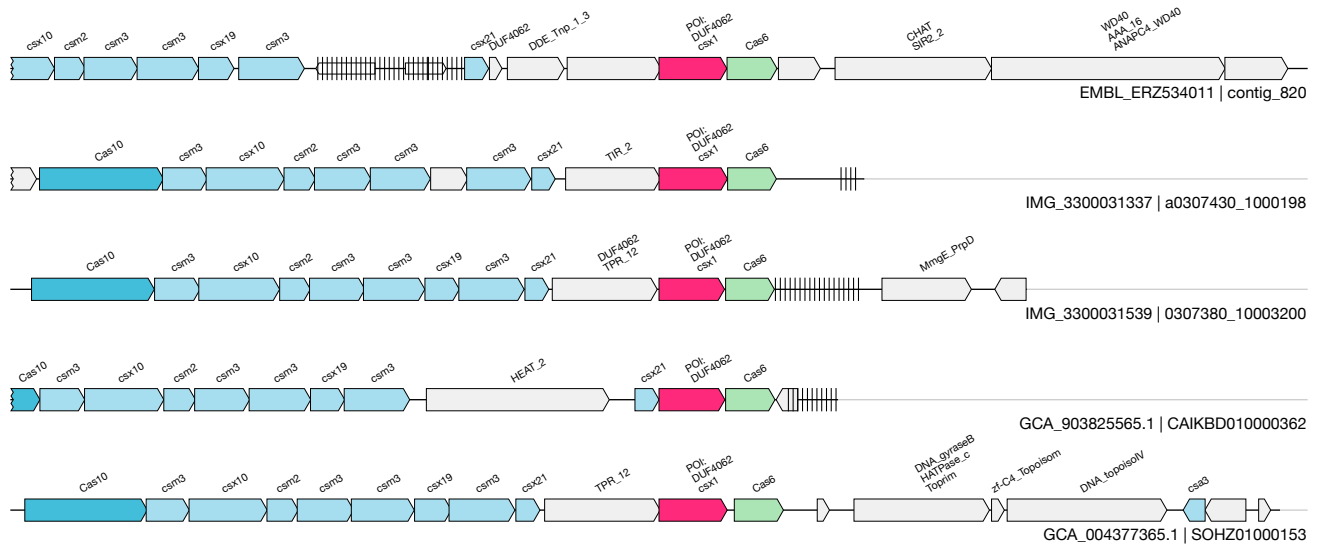

1kb

BH

UAS-64  
CARF

(CARF\_EAD7)

N/A

IMG\_3300031566&&0307378\_10017289&&164\_1499\_1 extraction

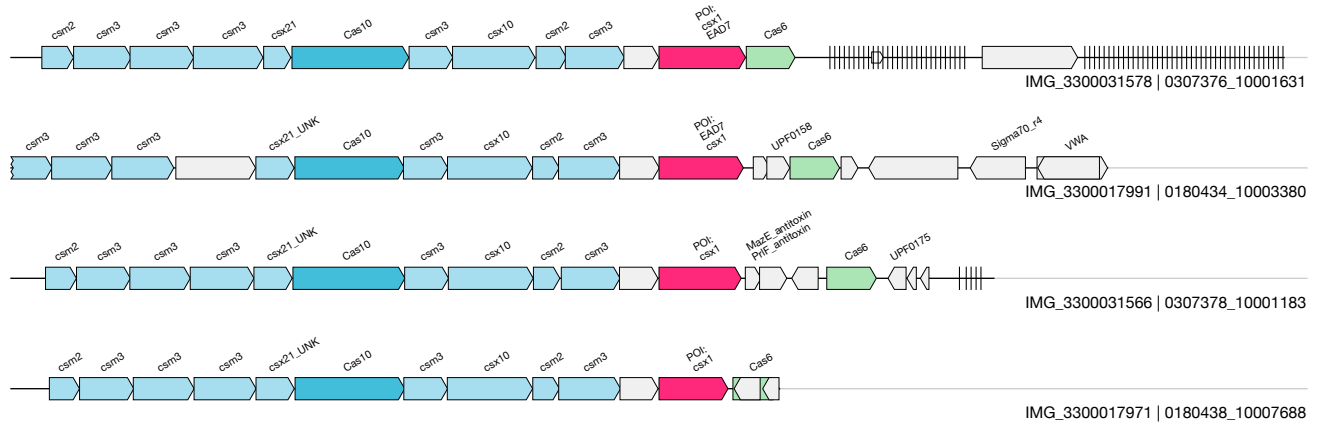

1kb

B1

UAS-65  
CARF

(CARF\_5p\_nucleotidase)  
IMG\_3300031994&&0310691\_10021322&&2165\_3863\_1 extraction

6 / 6.6

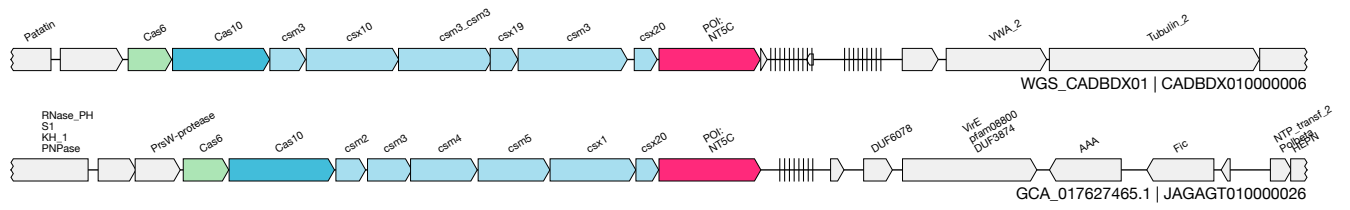

1kb

BJ

UAS-66  
CARF

(SAVED\_APH\_TCAD9)  
IMG\_3300034111&&a0335063\_0013299&&1300\_3253\_1

4 / 4.5

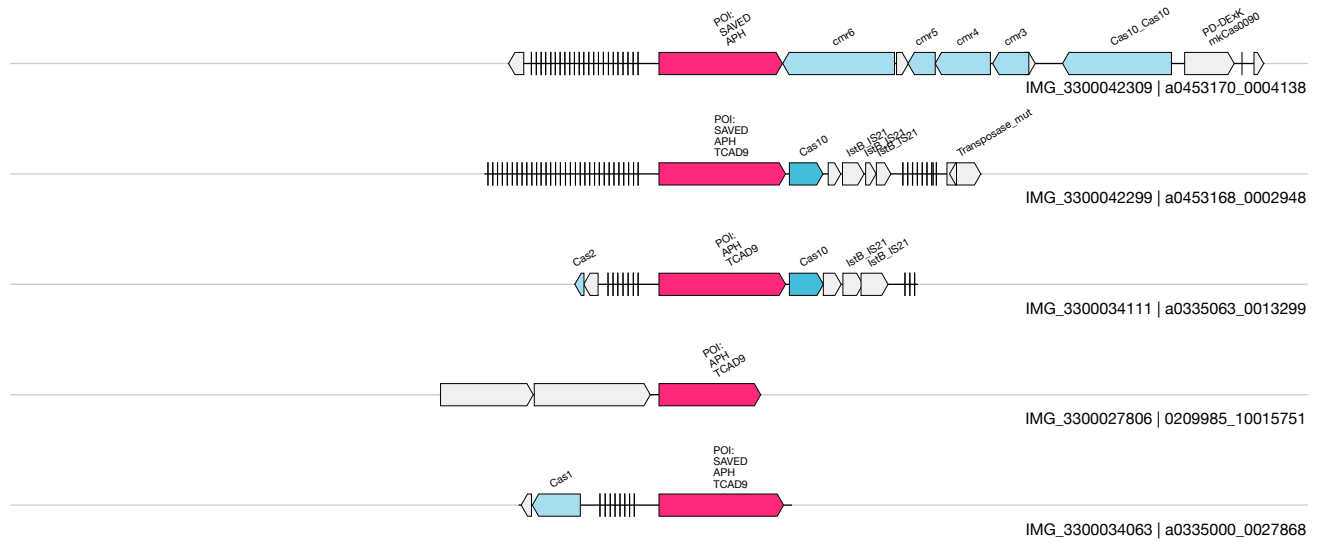

1kb

BK

UAS-67  
CARF

(Cutinase\_Lipase\_SAVED)  
IMG\_3300042939&&a0453142\_0007685&&8027\_9725\_-1

4 / 4.7

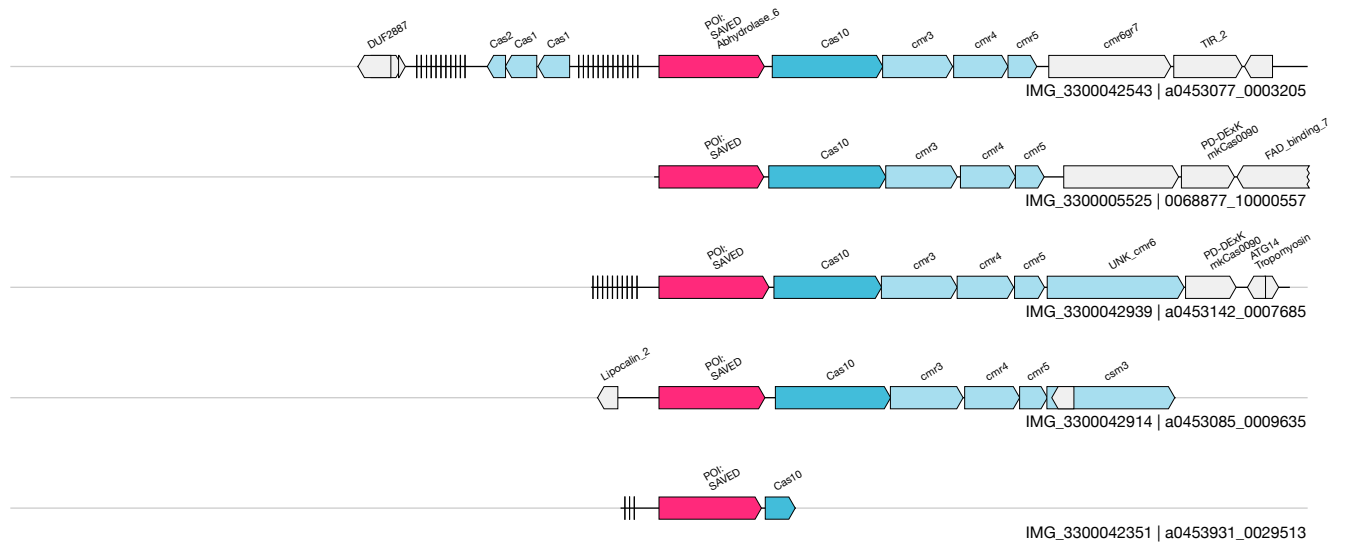

1kb

BL

UAS-68  
CARF

(SMODS + SAVED CHAT)  
IMG\_3300046790&&a0495499\_0000077&&7424\_8333\_1

N/A

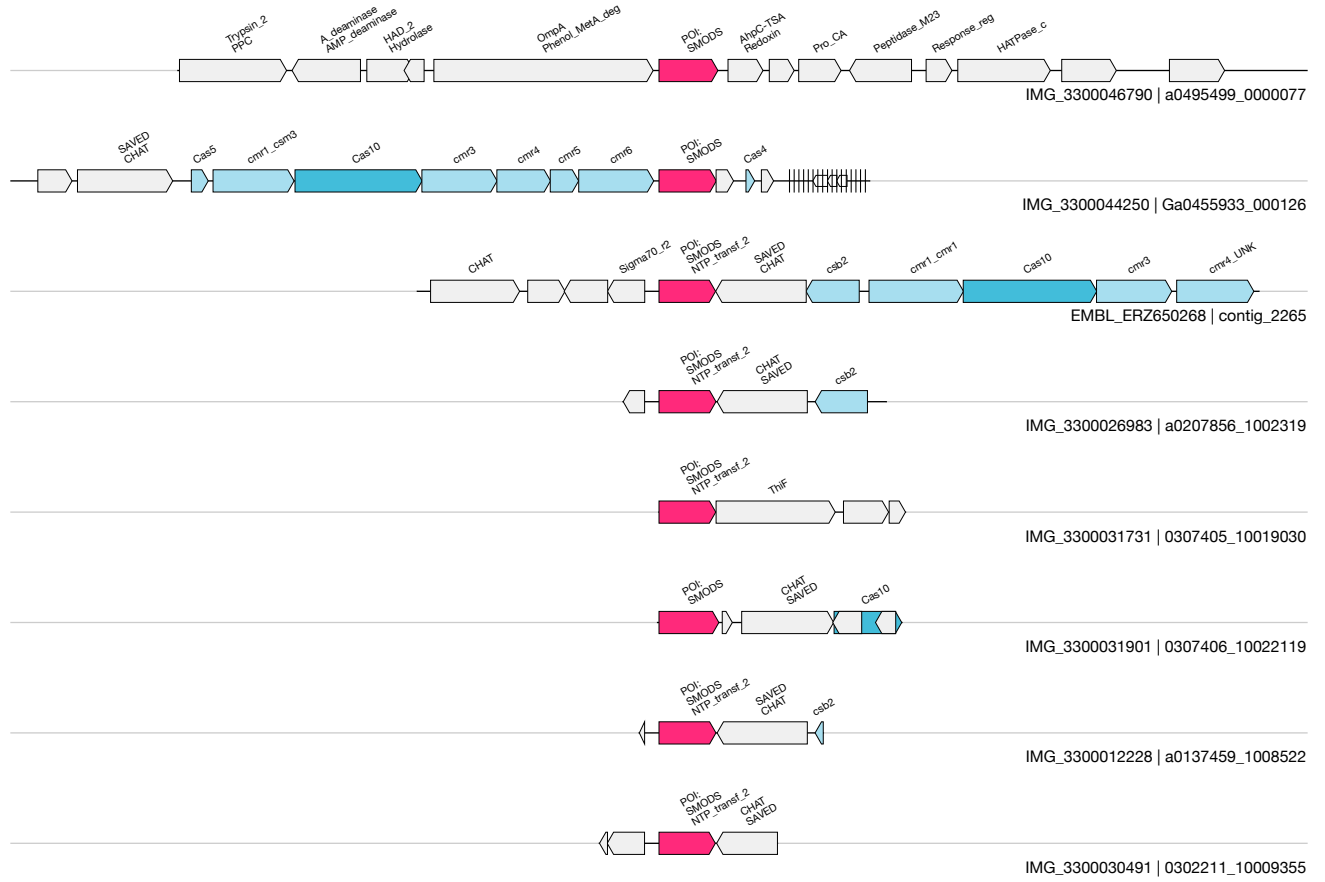

1kb

# BM

**UAS-69**  
Auxiliary

**(methyltransferase)**  
EMBL\_ERZ1030305&&contig\_263&&8899\_9757\_1

3 / 7.0

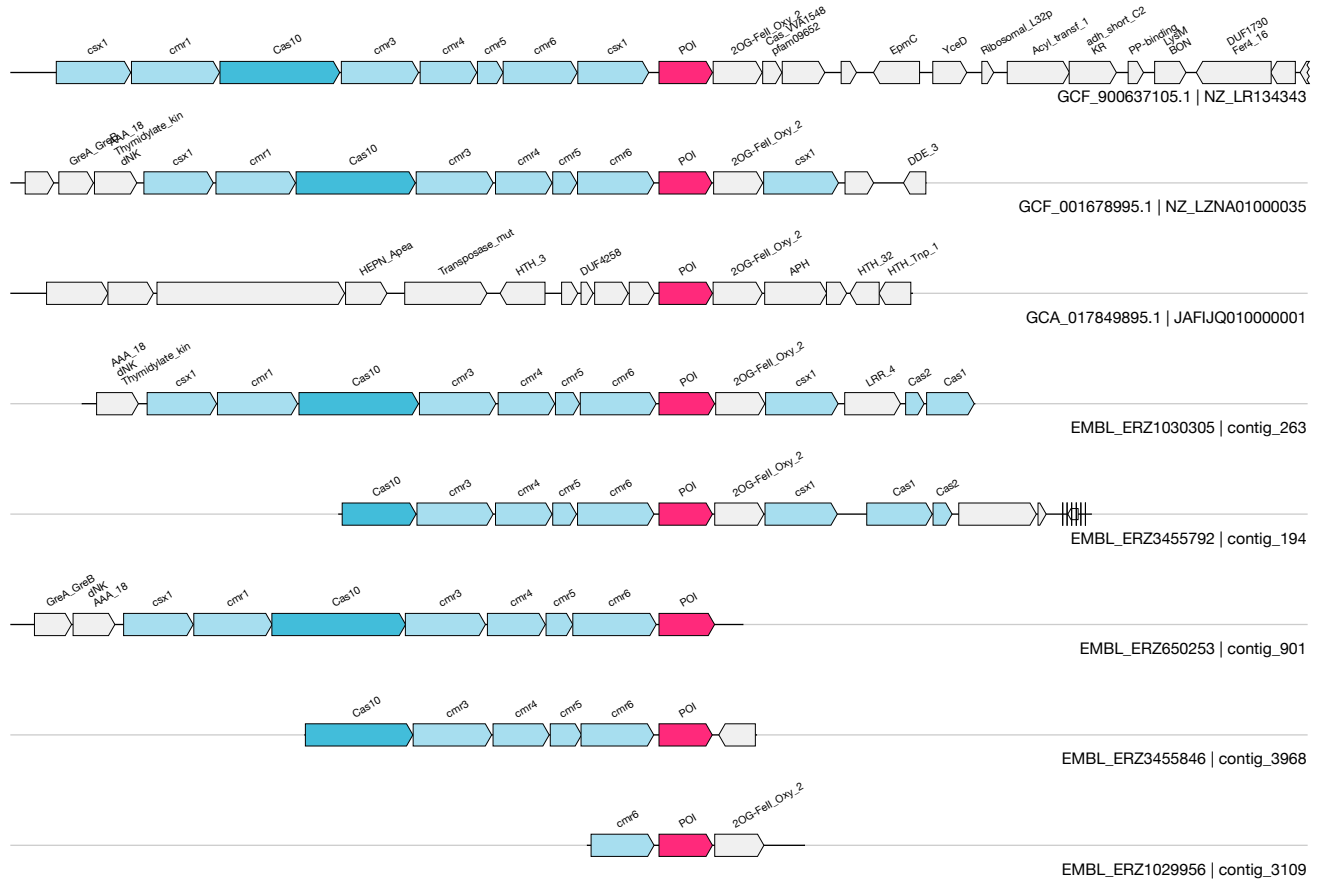

1kb

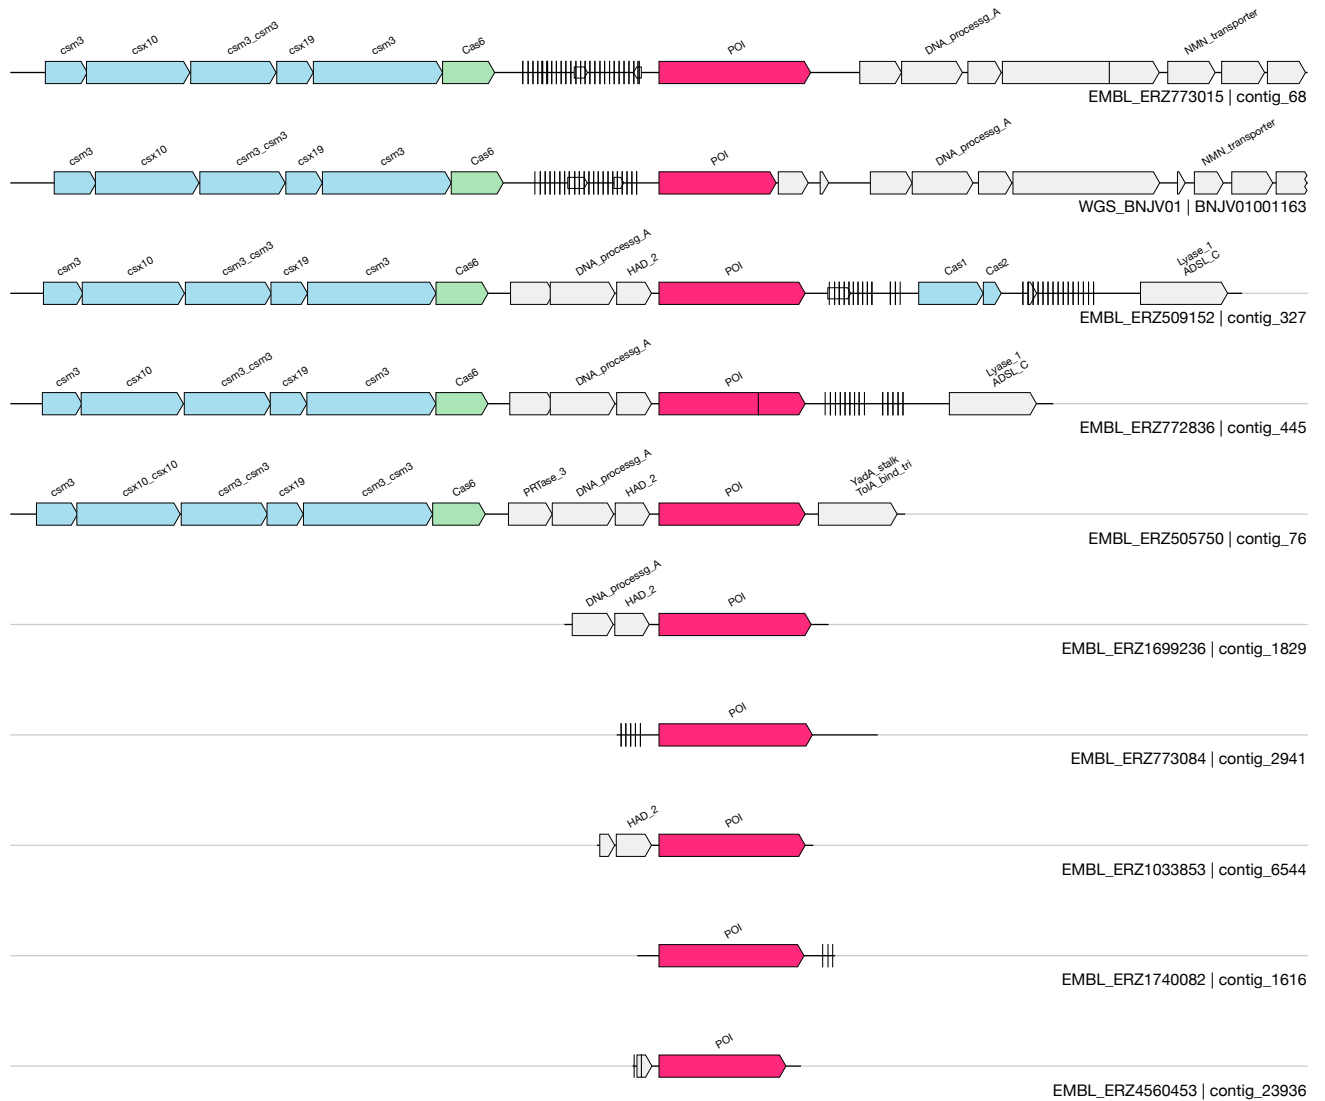

1kb



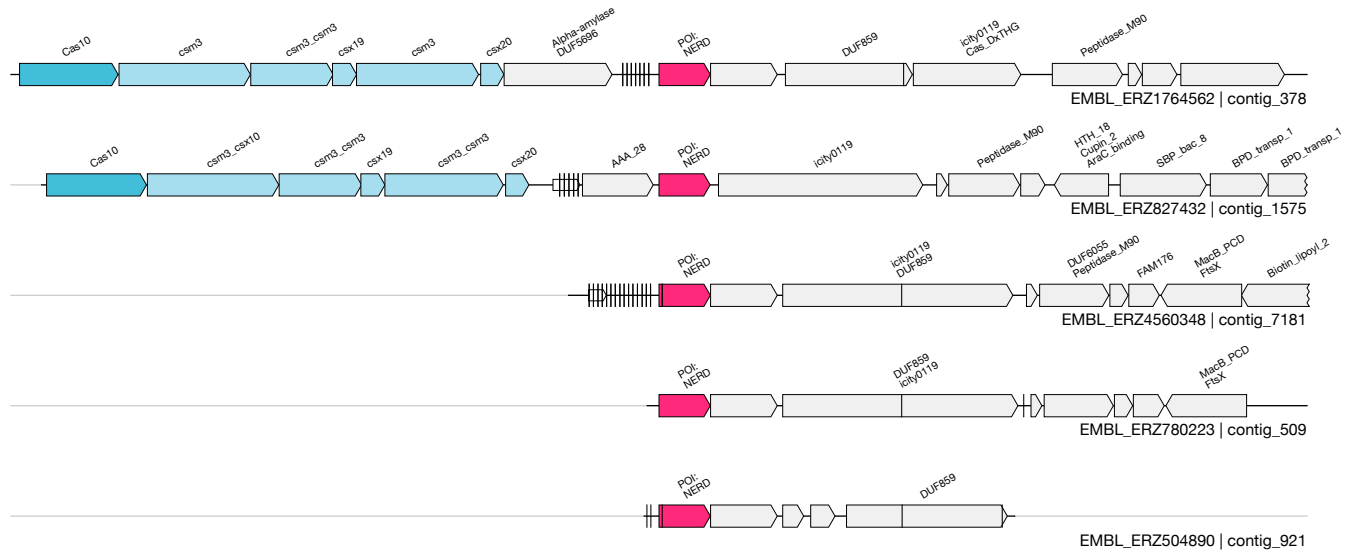

1kb

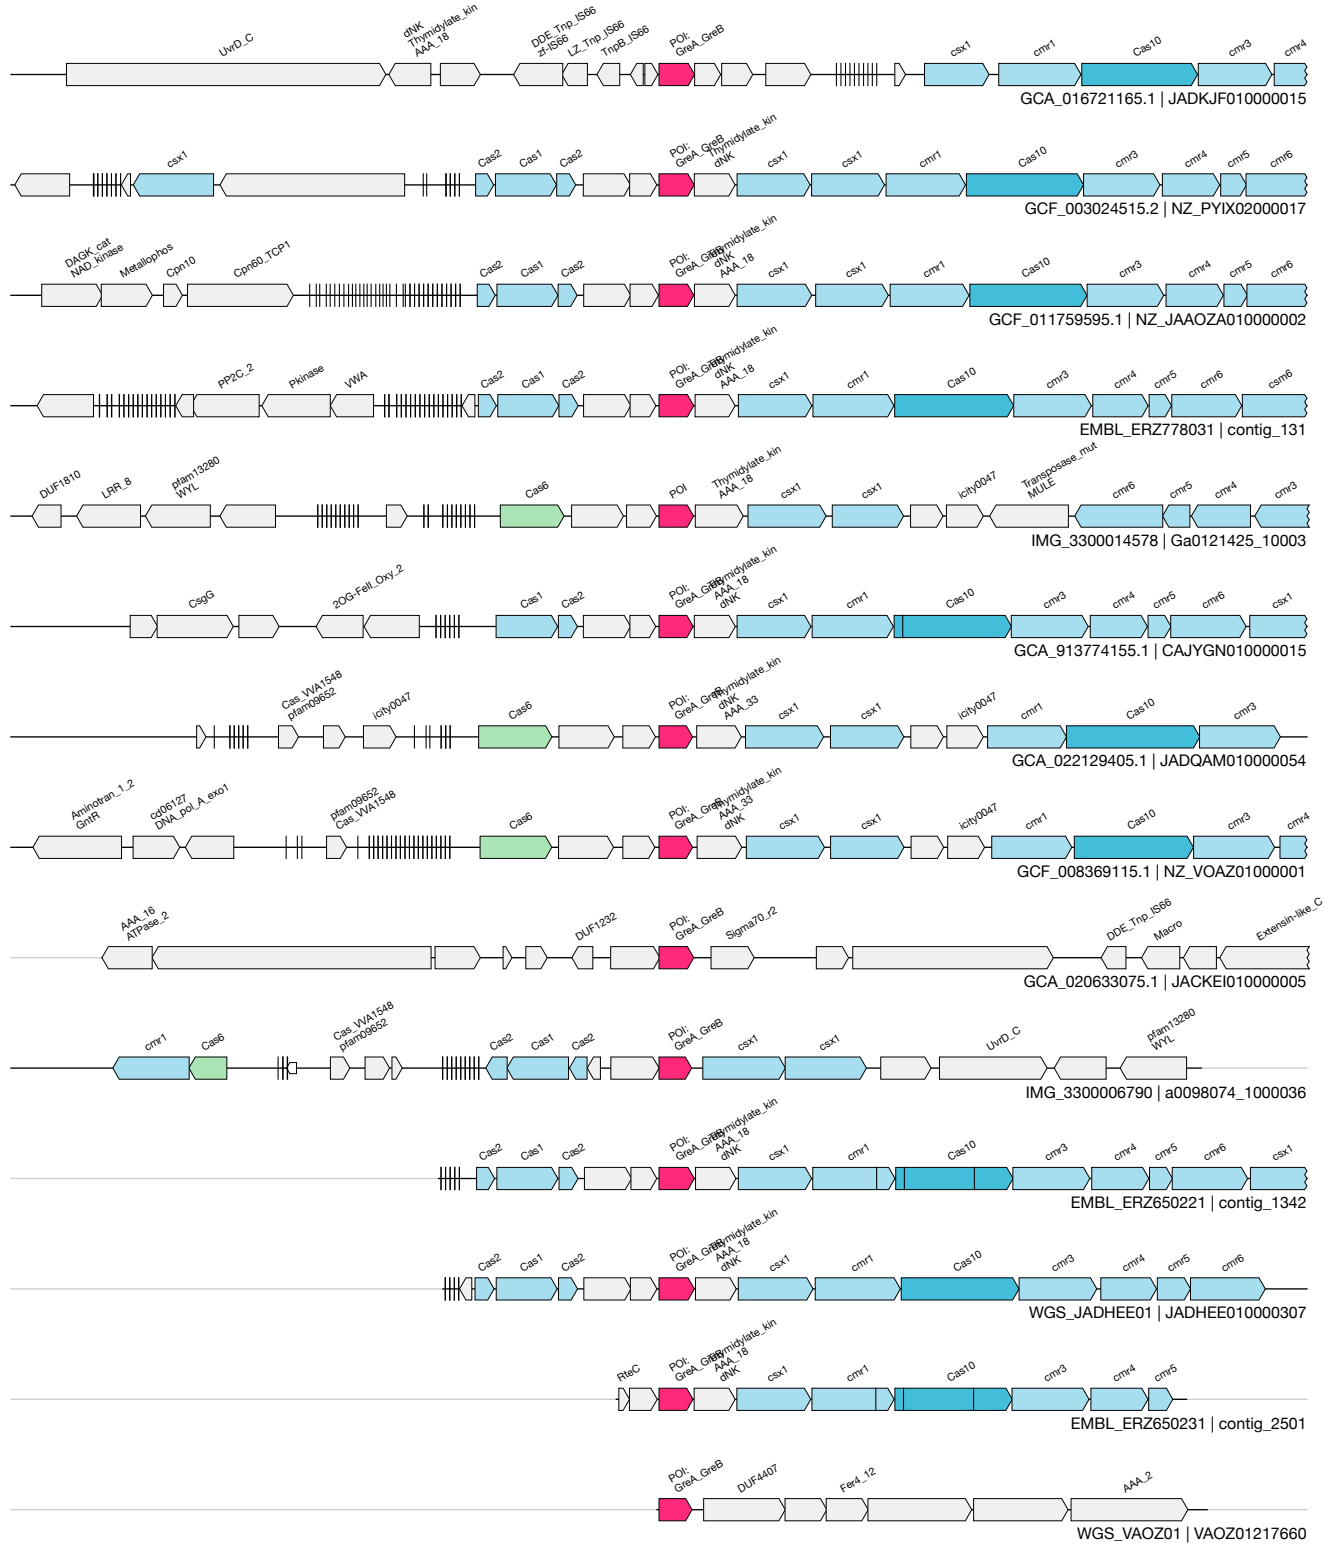

1kb

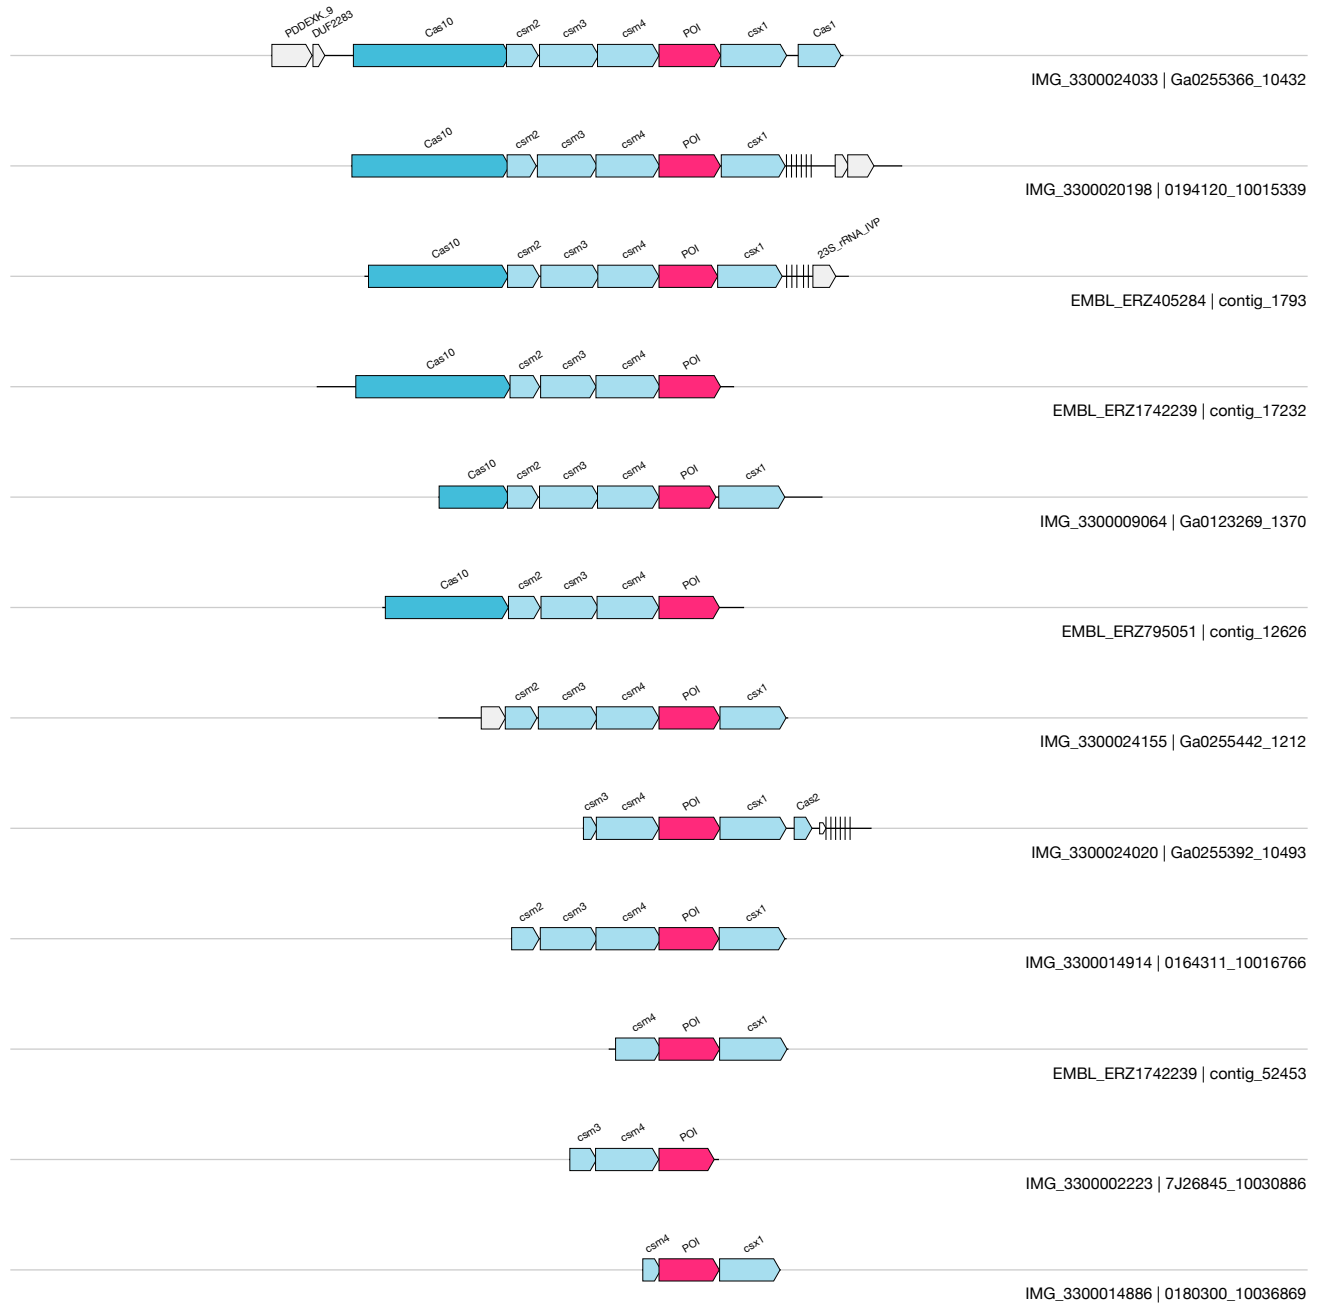

1kb

BR

**UAS-74**  
Auxiliary

**(PKinase)**  
EMBL\_ERZ4560480&&contig\_4482&&7569\_10323\_-1

2 / 3.4

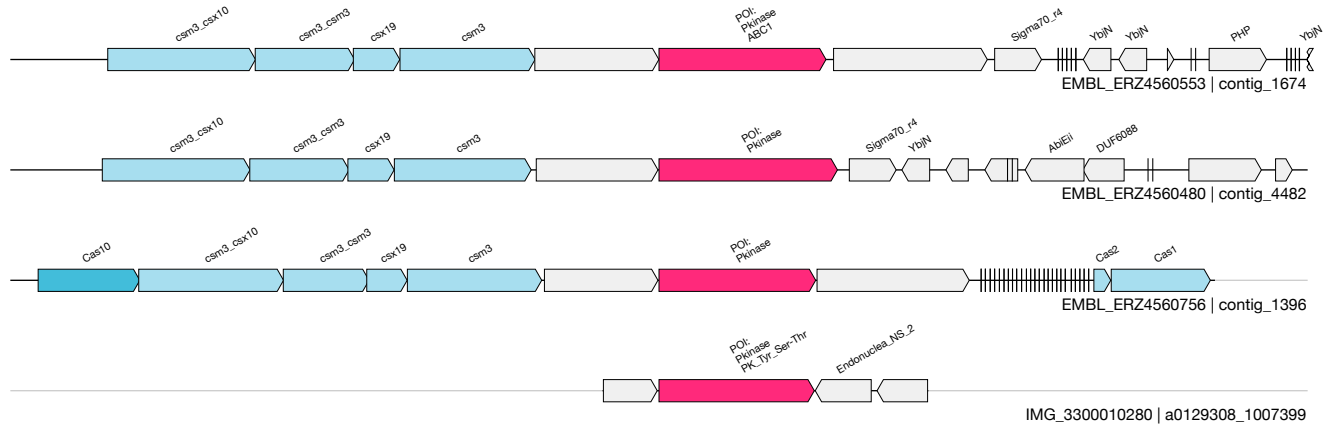

1kb

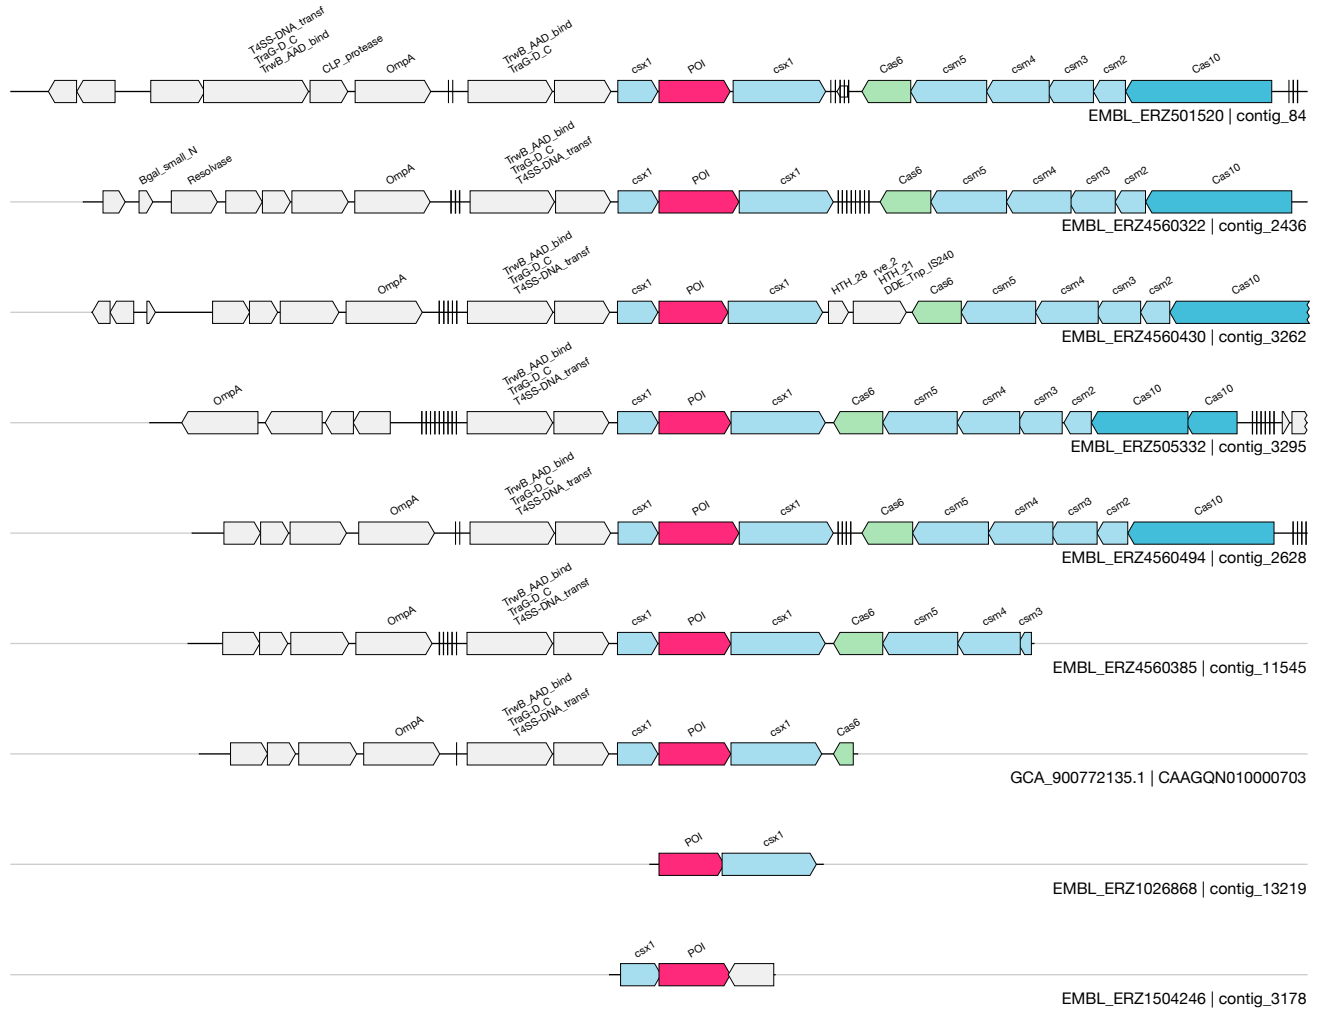

1kb

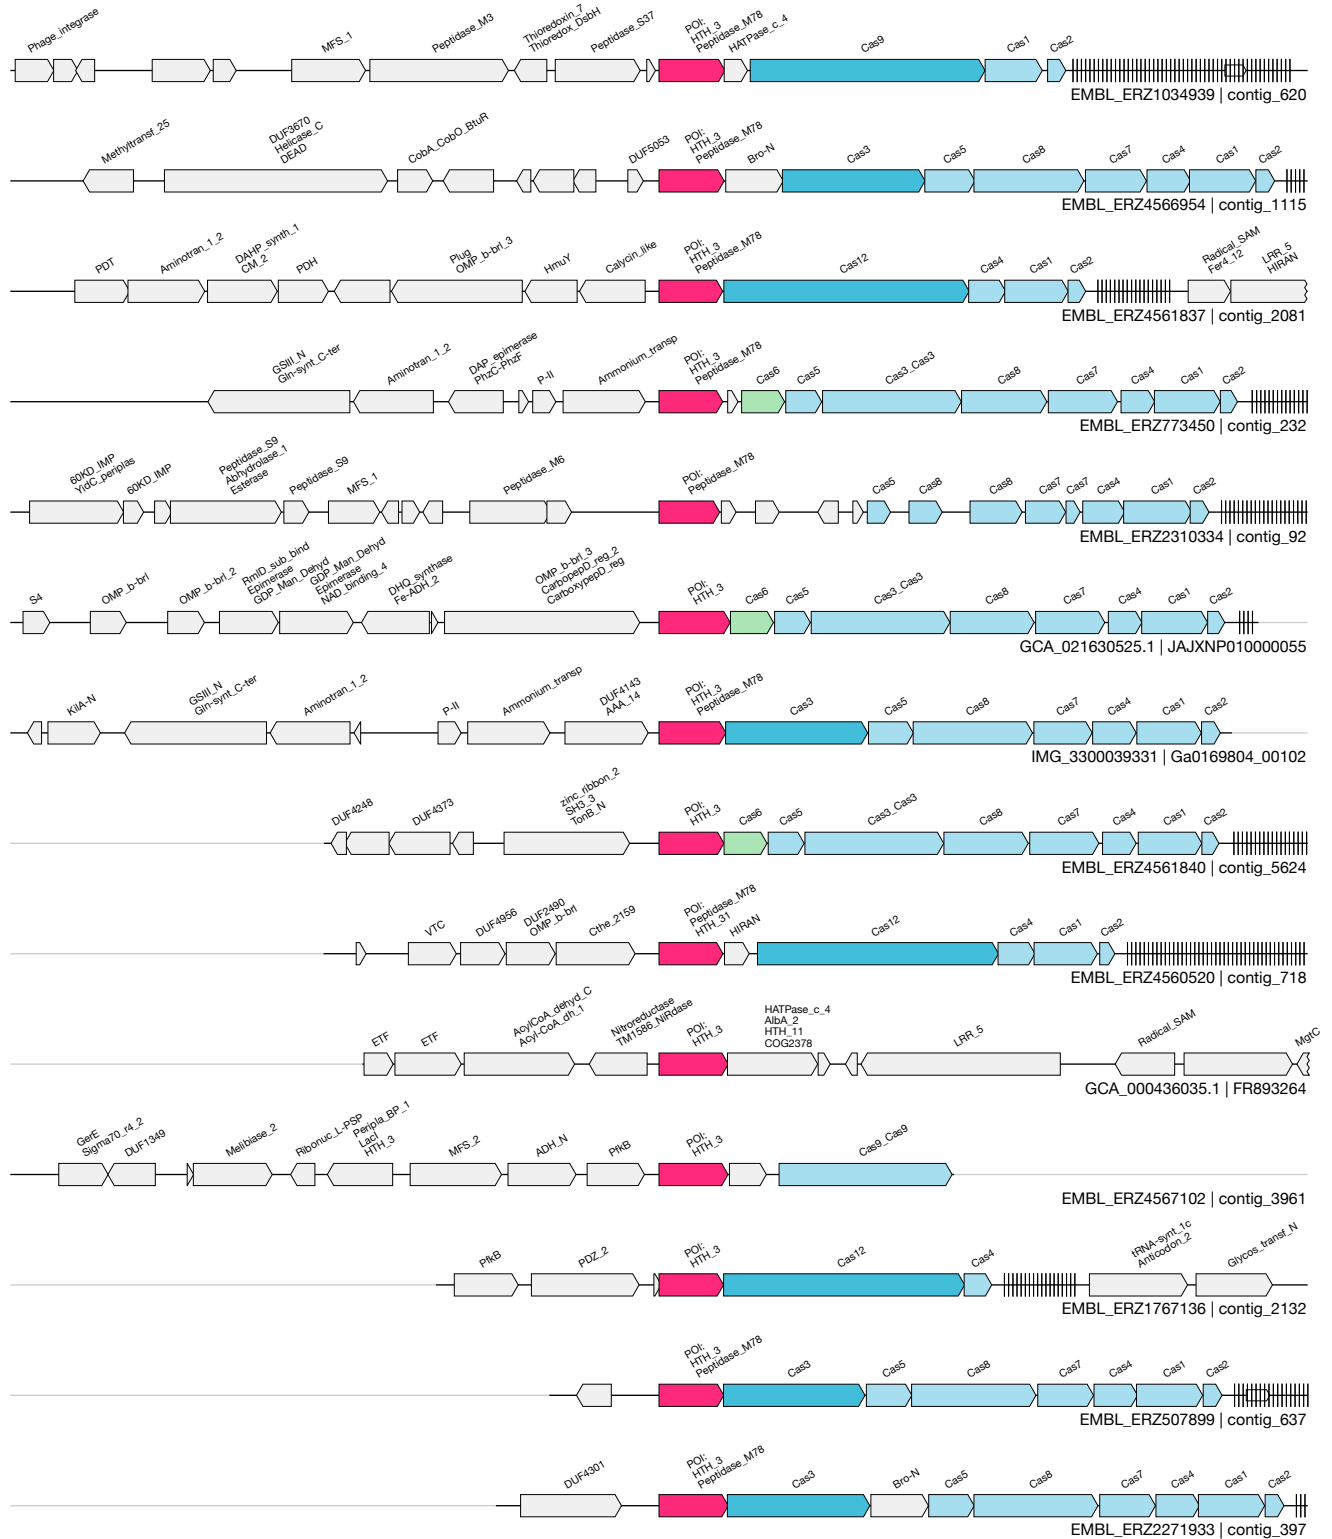

1kb

# BU

**UAS-77**  
Auxiliary

**(DUF2283)**  
EMBL\_ERZ584659&&contig\_1773&&510\_1521\_-1

3 / 5.5

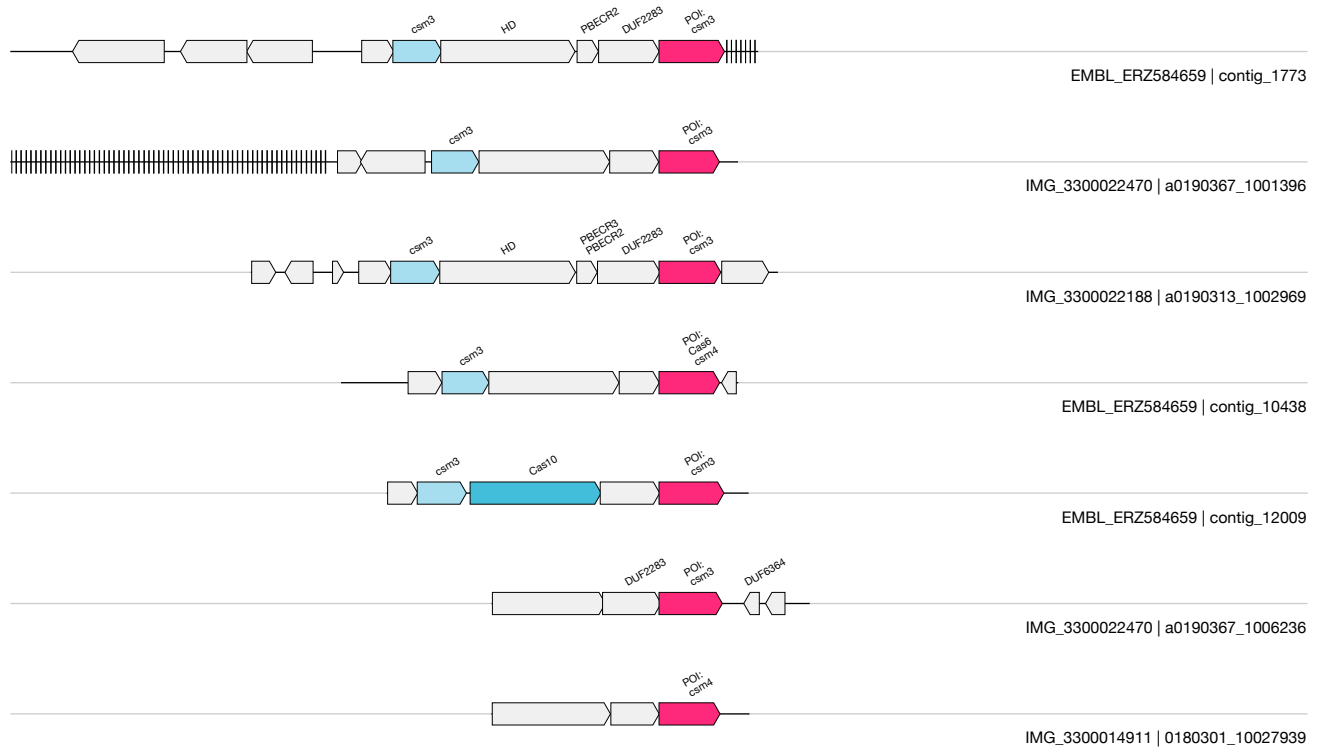

1kb

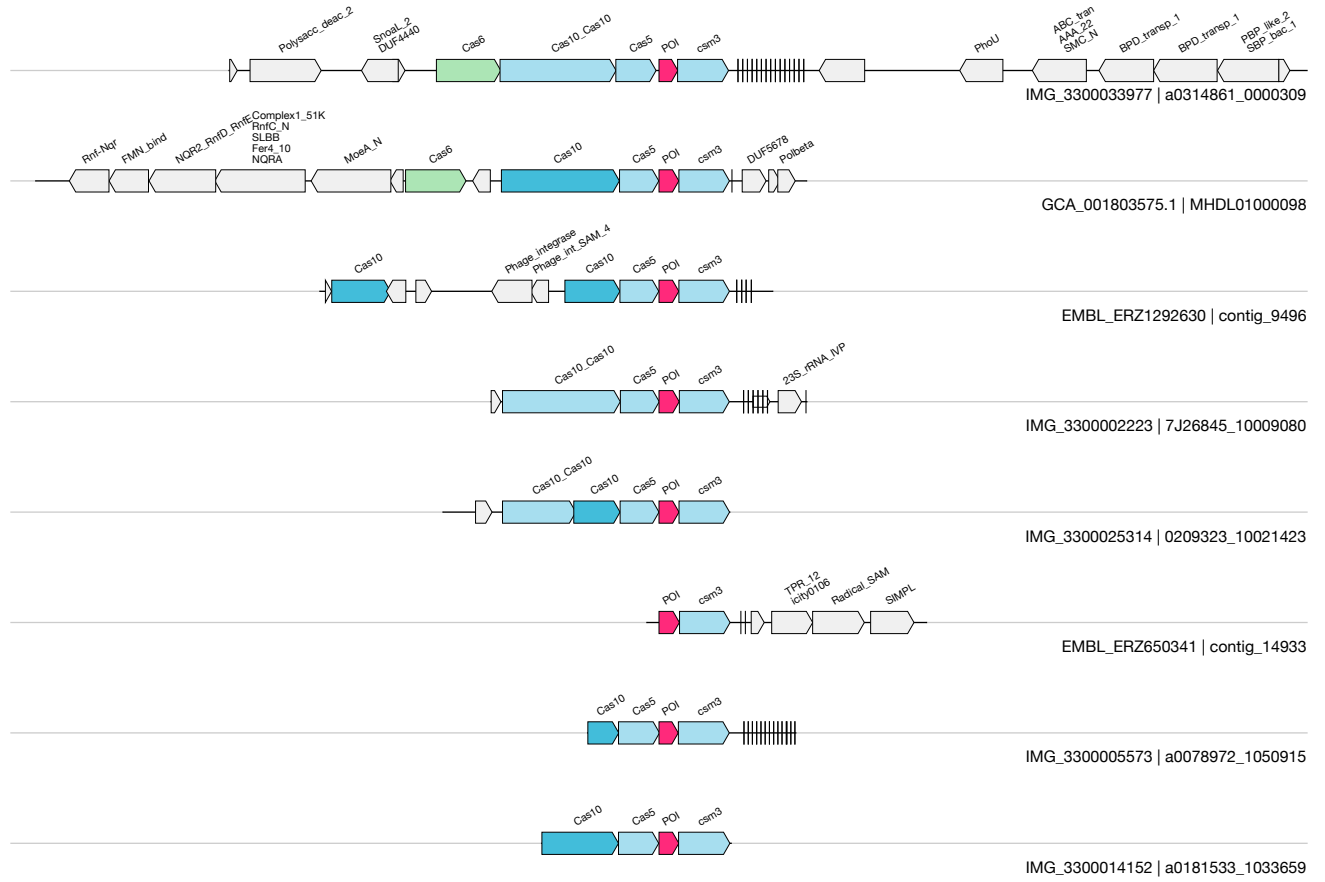

1kb



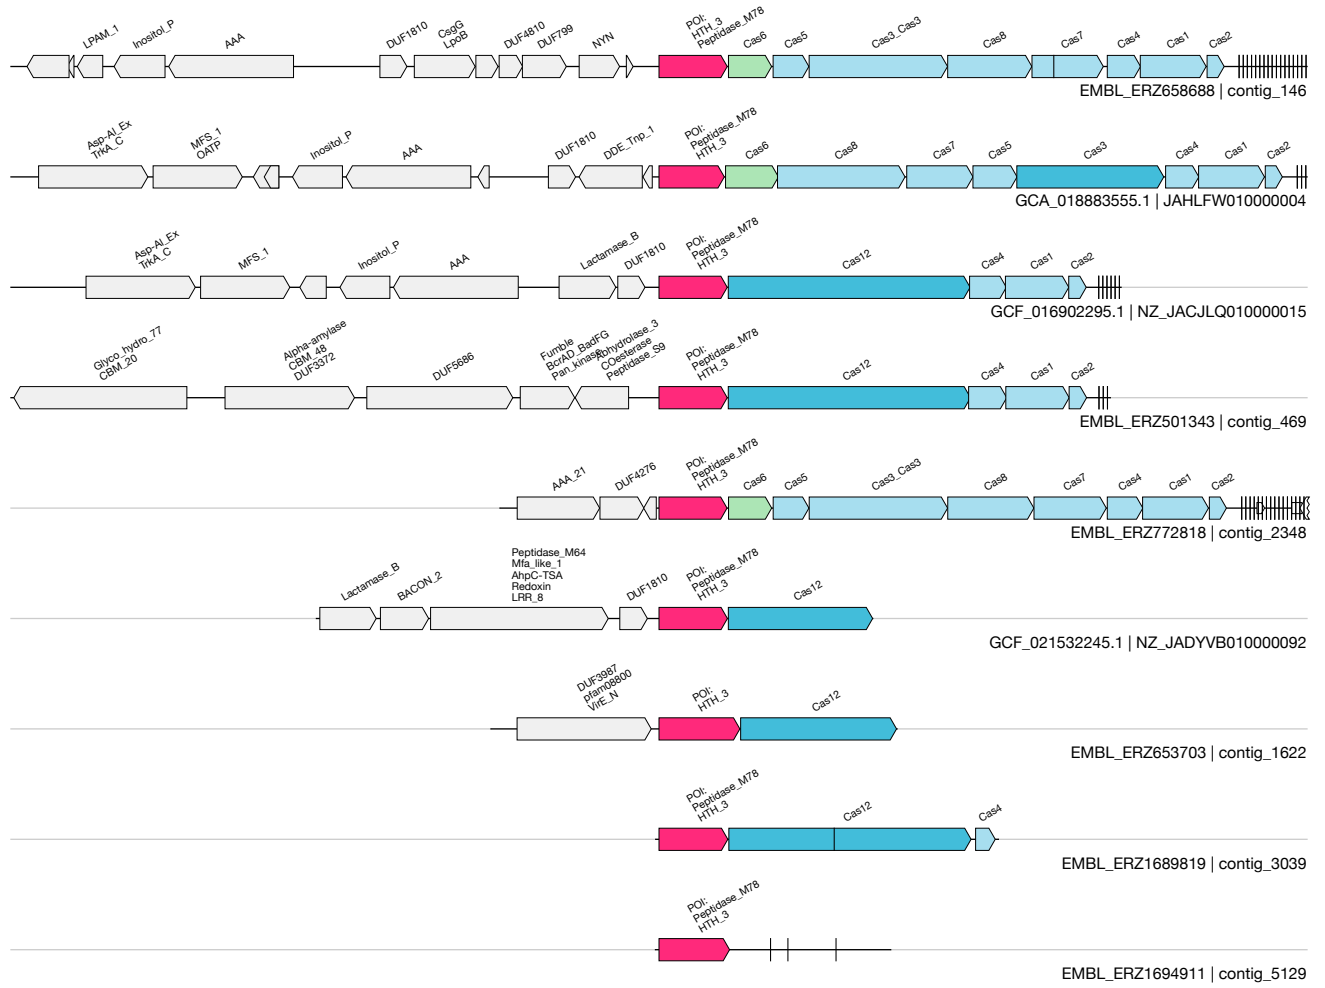

1kb

BX

UAS-80  
Auxiliary

(RepA replication)  
EMBL\_ERZ724078&&contig\_5708&&5799\_7854\_-1

5 / 5.1

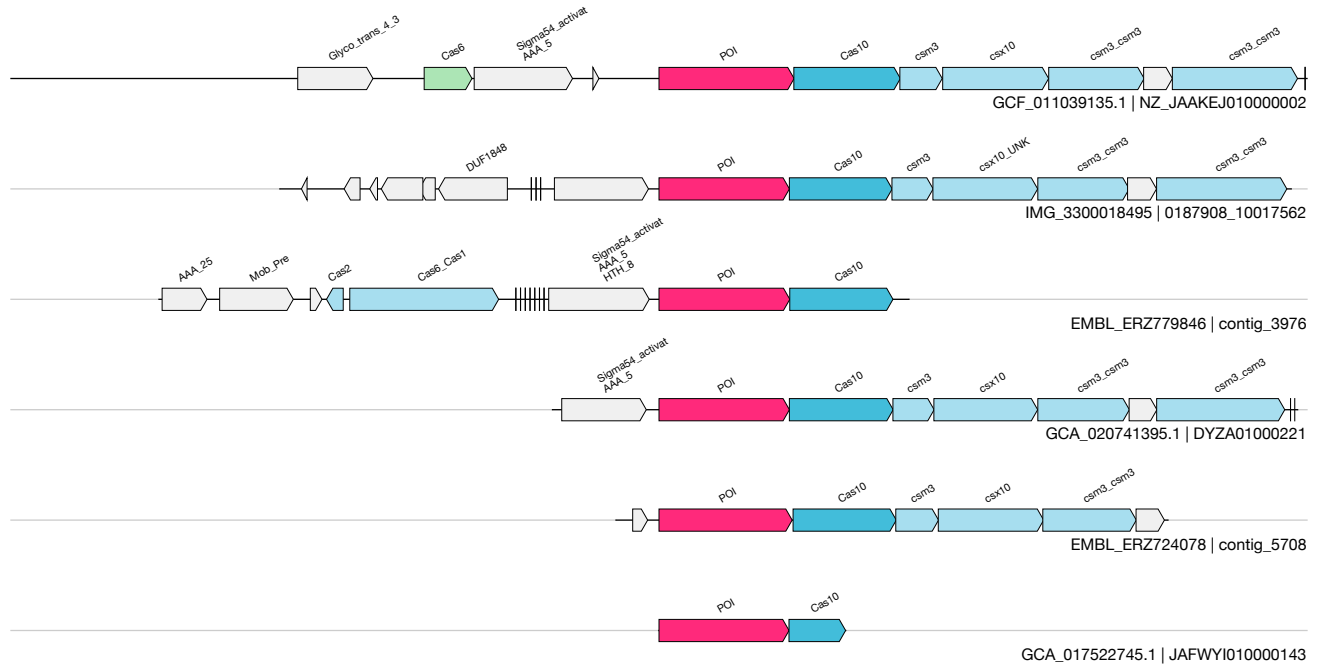

1kb

BY

**UAS-81**  
Auxiliary

**(DUF4145)**  
EMBL\_ERZ724507&&contig\_6357&&940\_1633\_-1

3 / 3.0

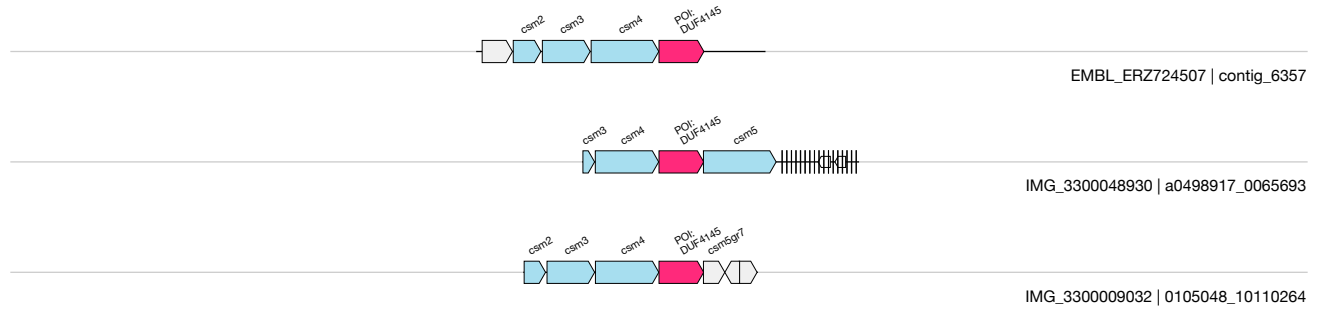

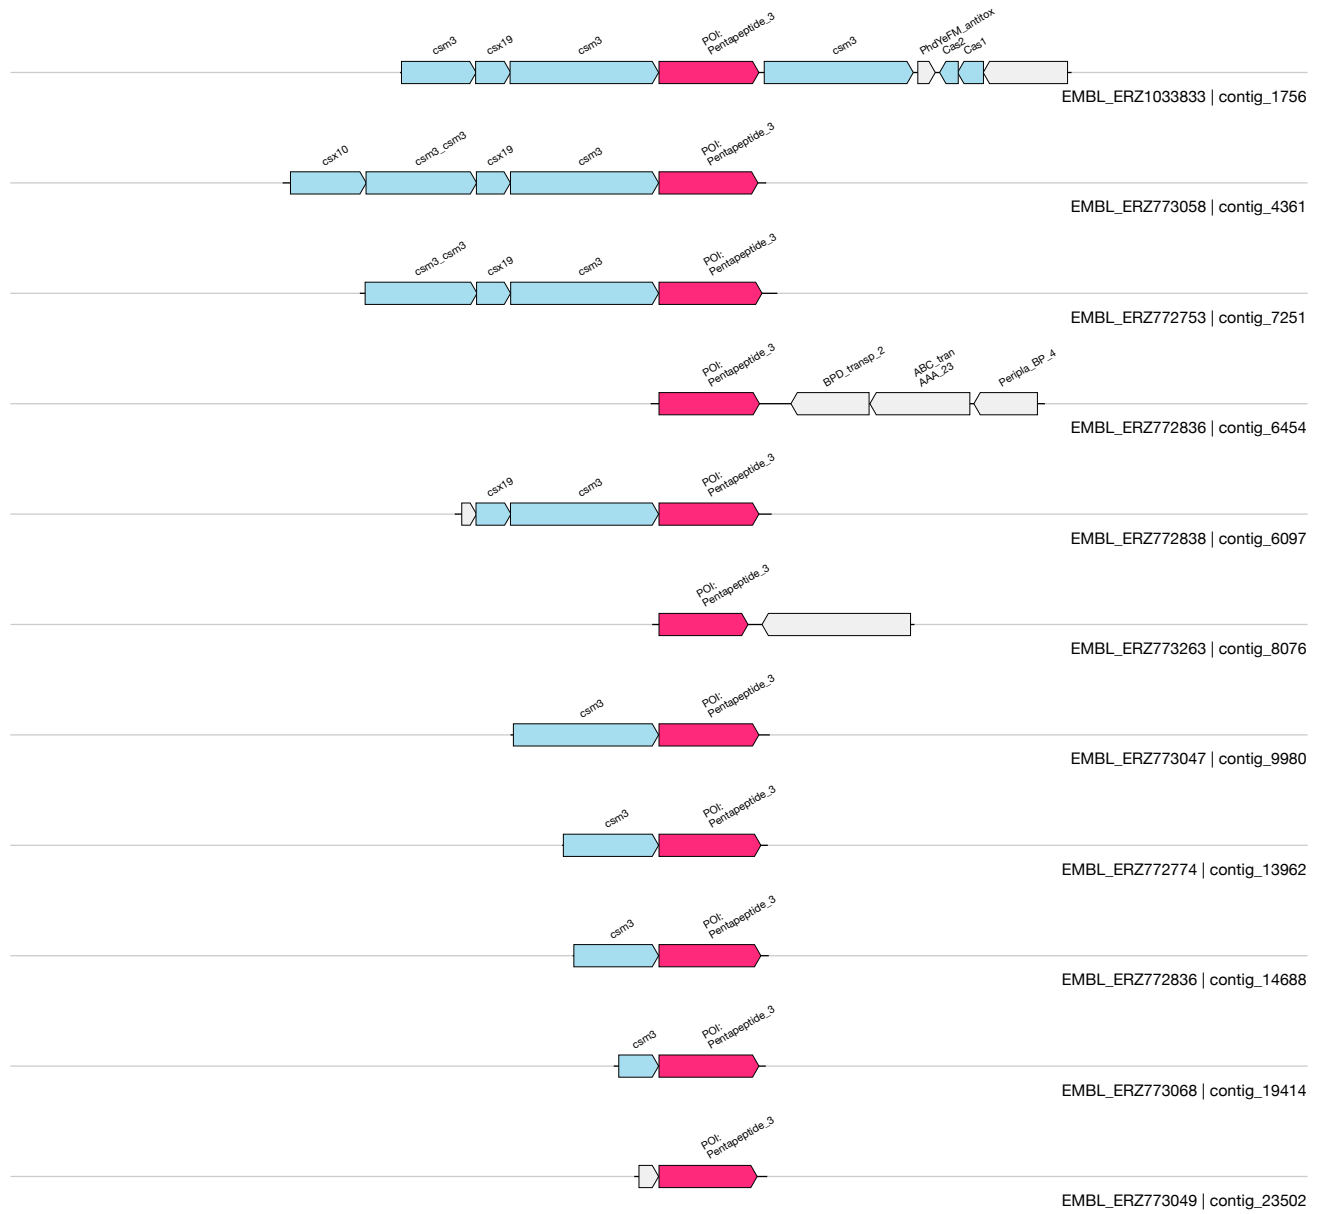

1kb

# CA

**UAS-83**  
Auxiliary

**(Recep domain + 4 unknown genes)**  
EMBL\_ERZ773219&&contig\_530&&18381\_19626\_1

8 / 8.0

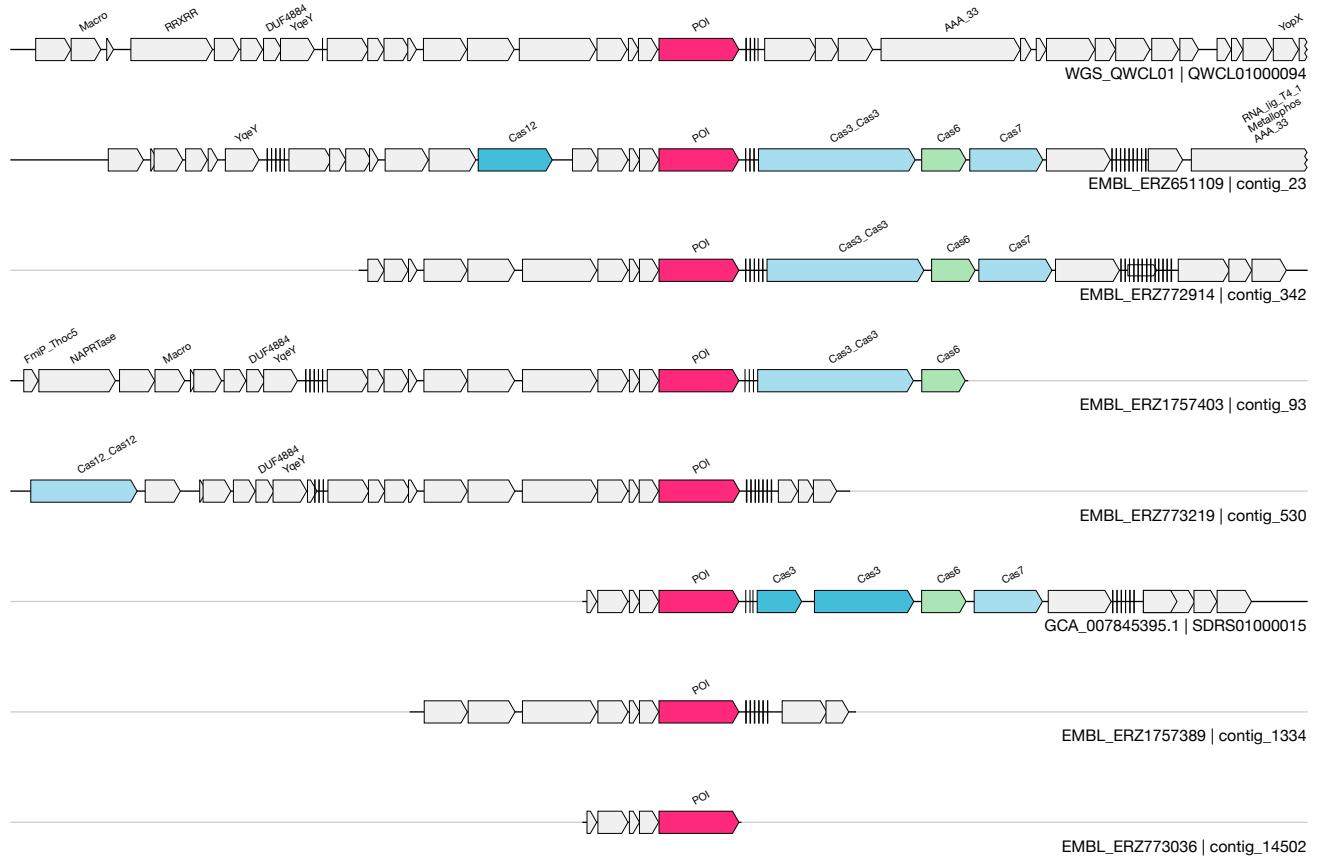

1kb

# CB

**UAS-84**  
Auxiliary

**(MazF)**  
EMBL\_ERZ773360&&contig\_3930&&5259\_6435\_-1

2 / 5.3

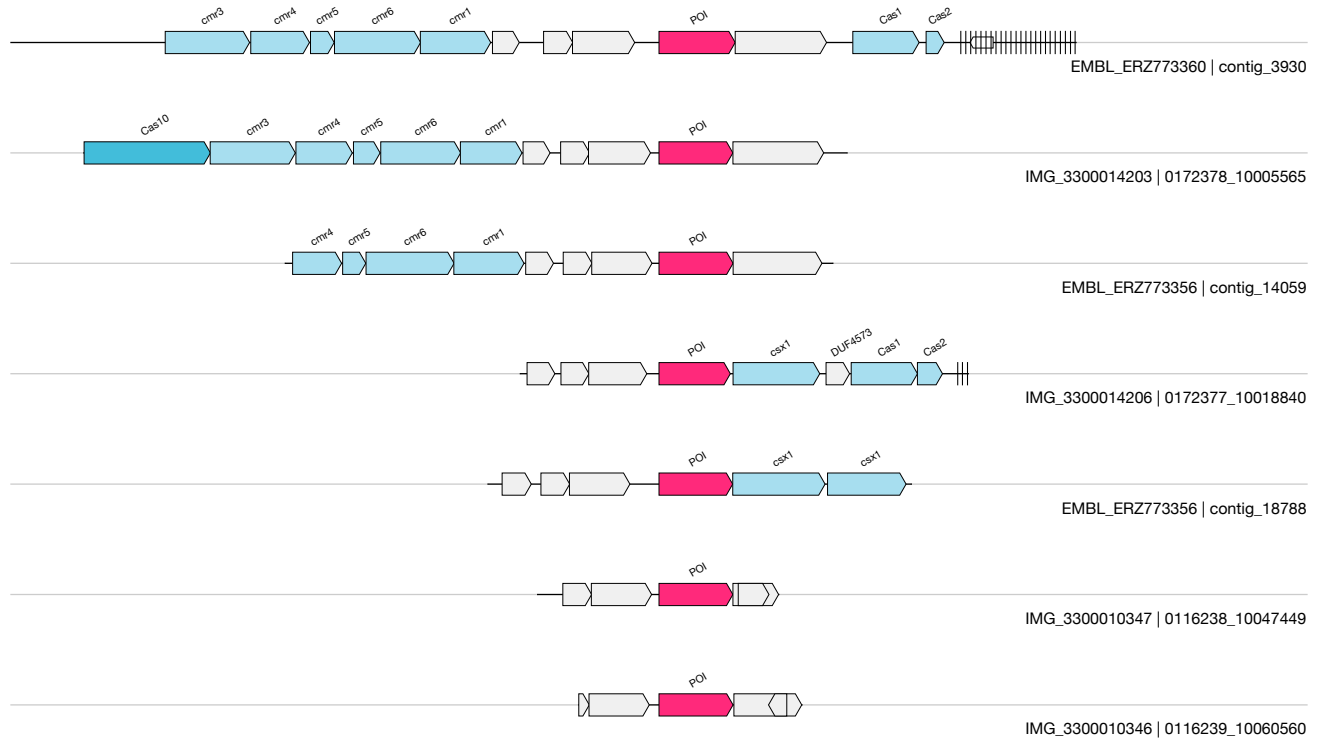

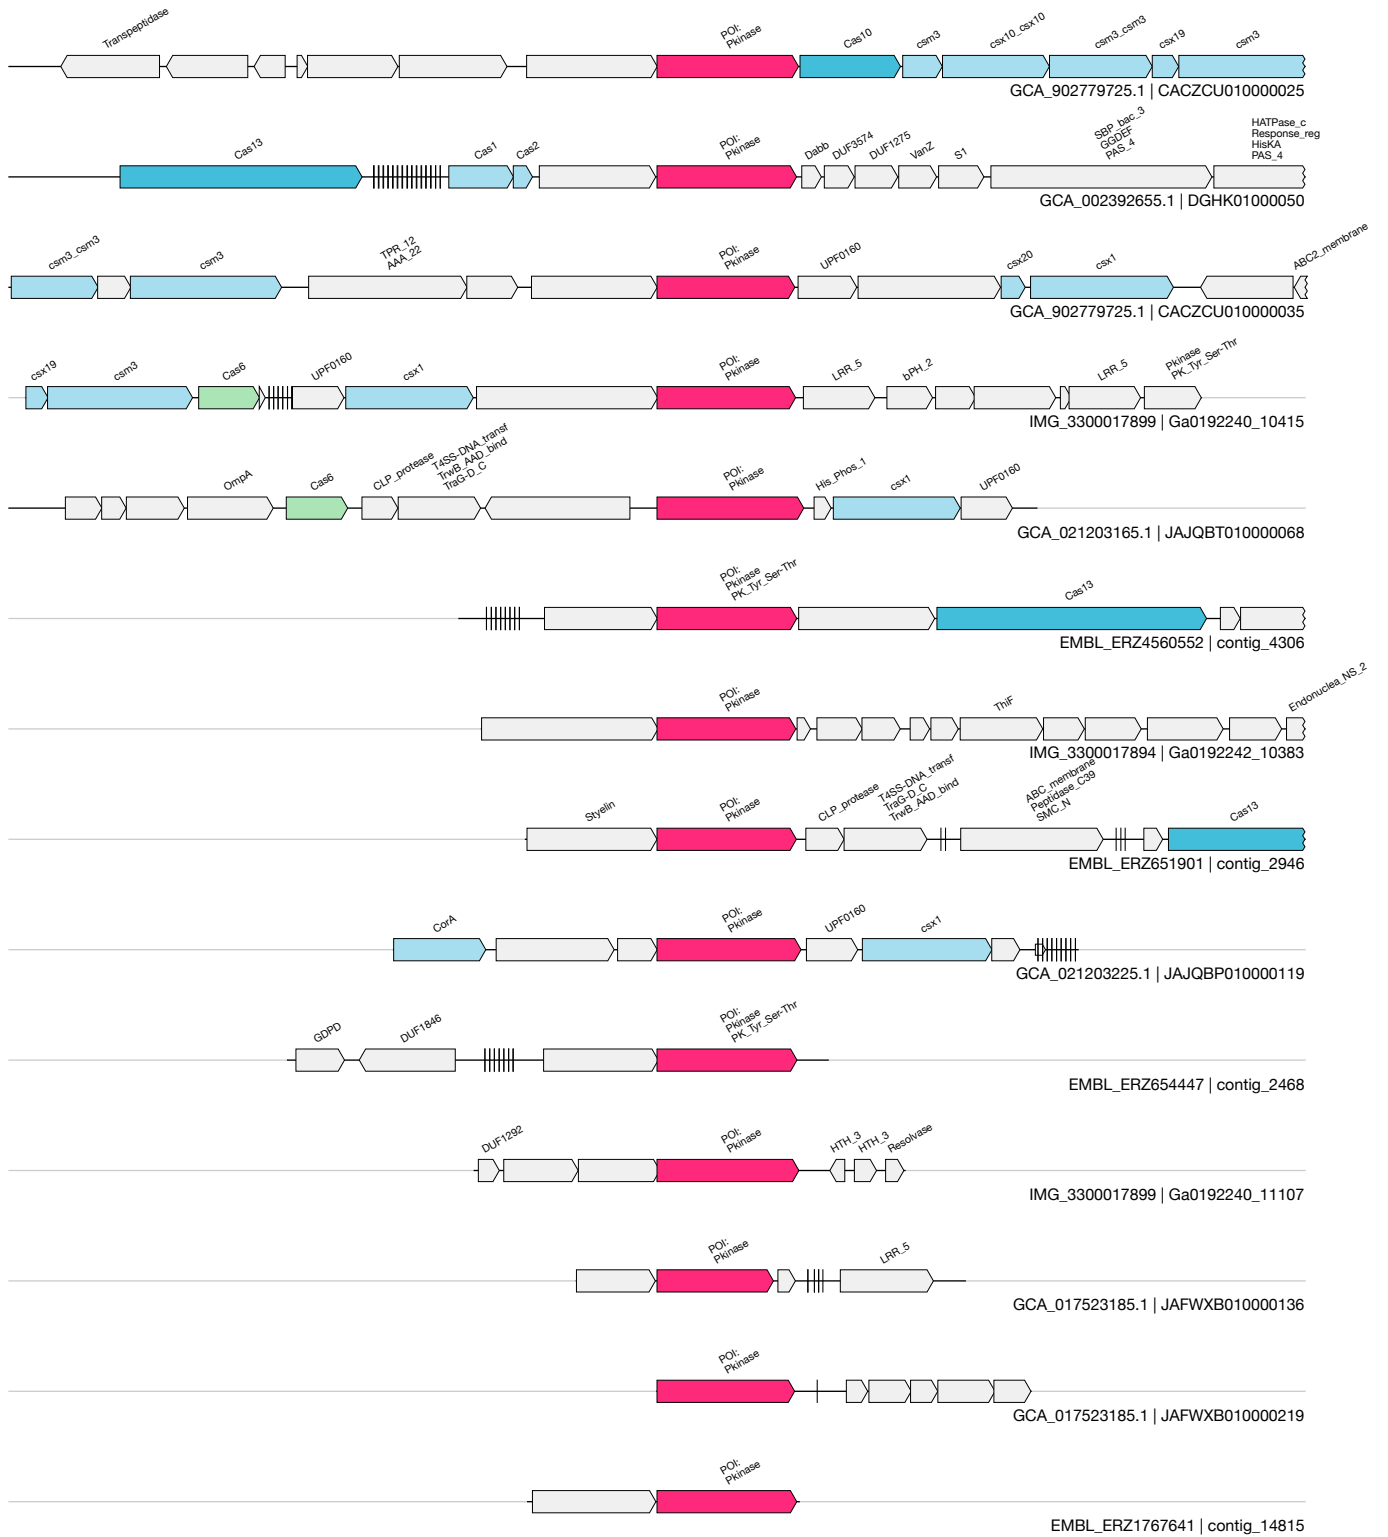

1kb

CD

**UAS-85**  
Auxiliary

**(betalactamase)**  
EMBL\_ERZ778607&&contig\_14514&&540\_2586\_-1

2 / 5.5

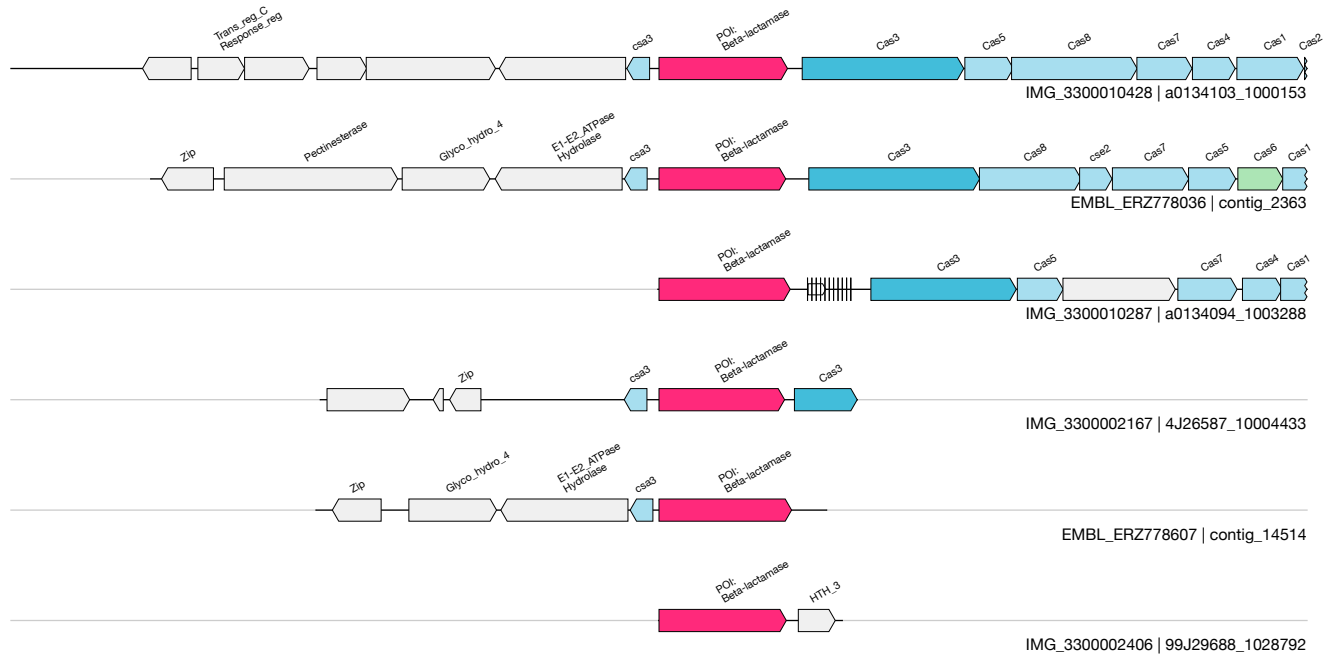

1kb



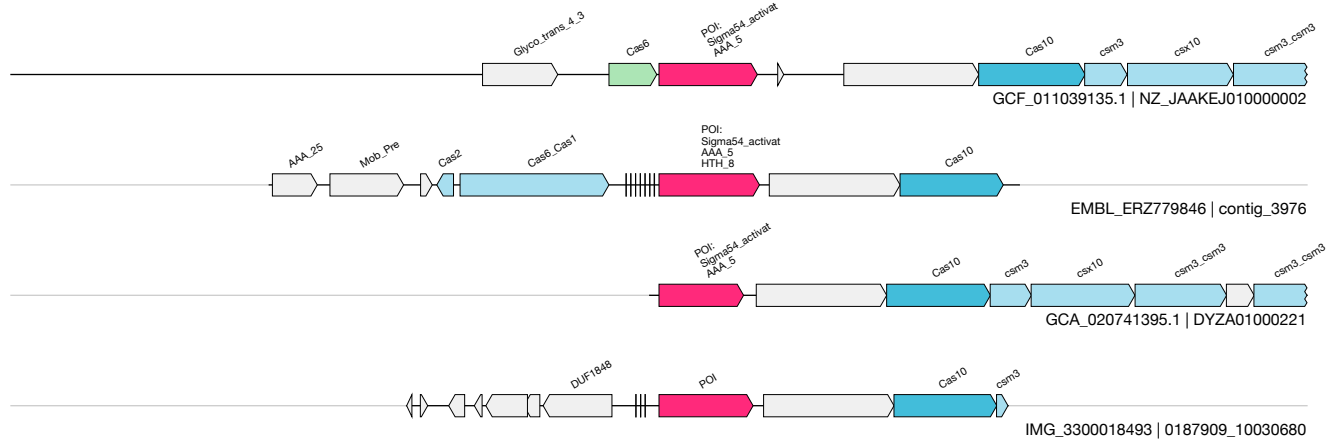

1kb

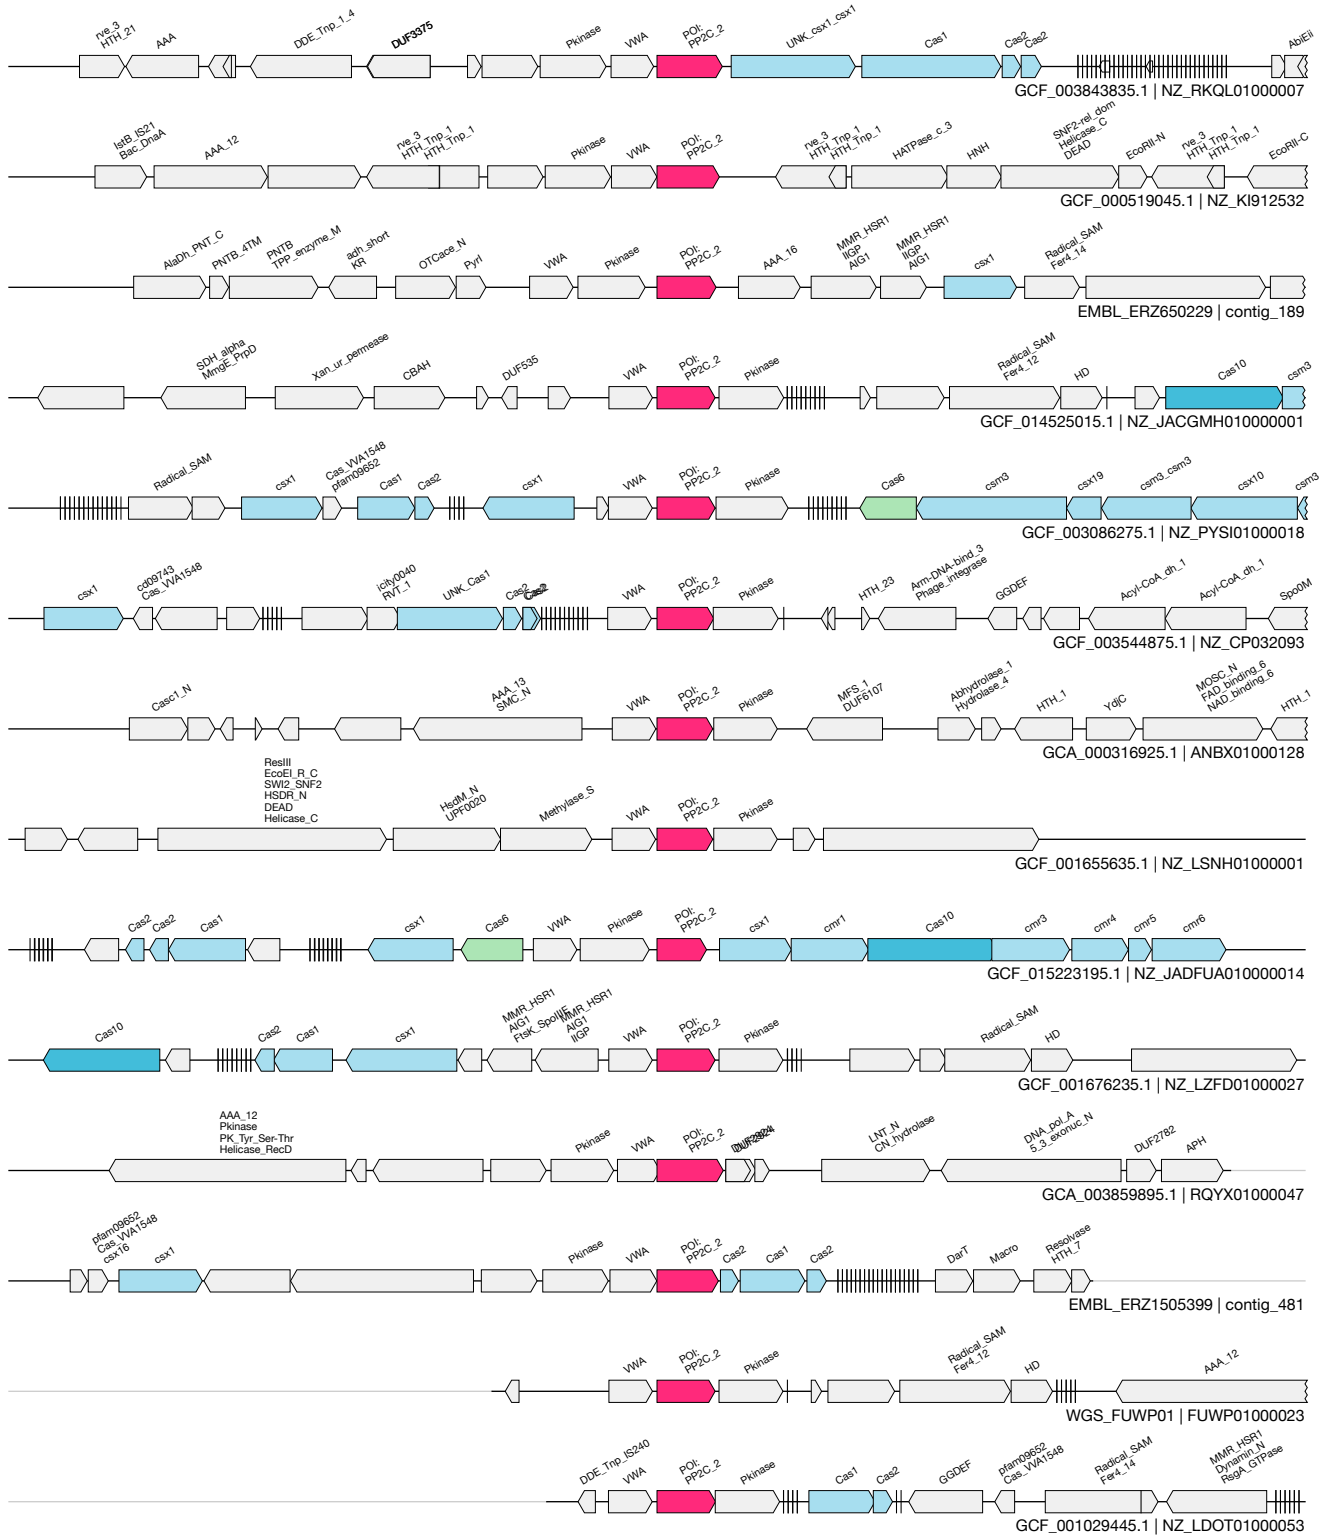

1kb

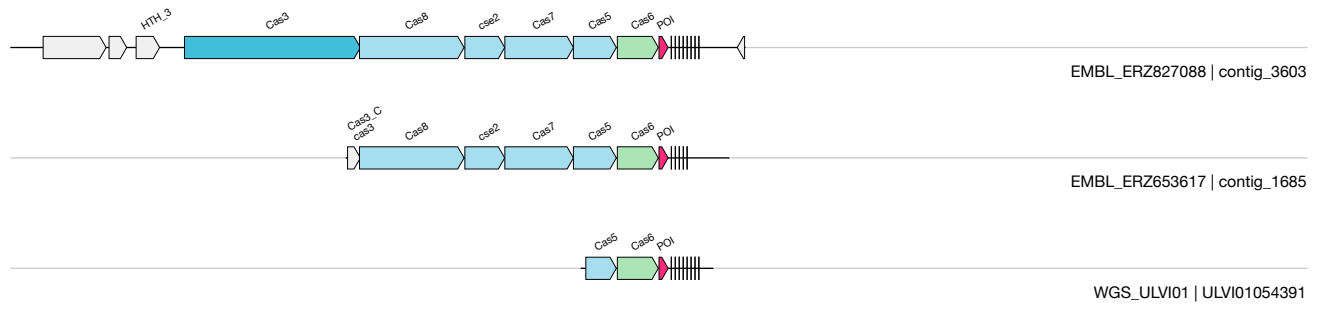

1kb

# CH

**UAS-88**  
Auxiliary

**(Sigma factor + Csx1)**  
EMBL\_ERZ842392&&contig\_23636&&3690\_4530\_1

6 / 7.2

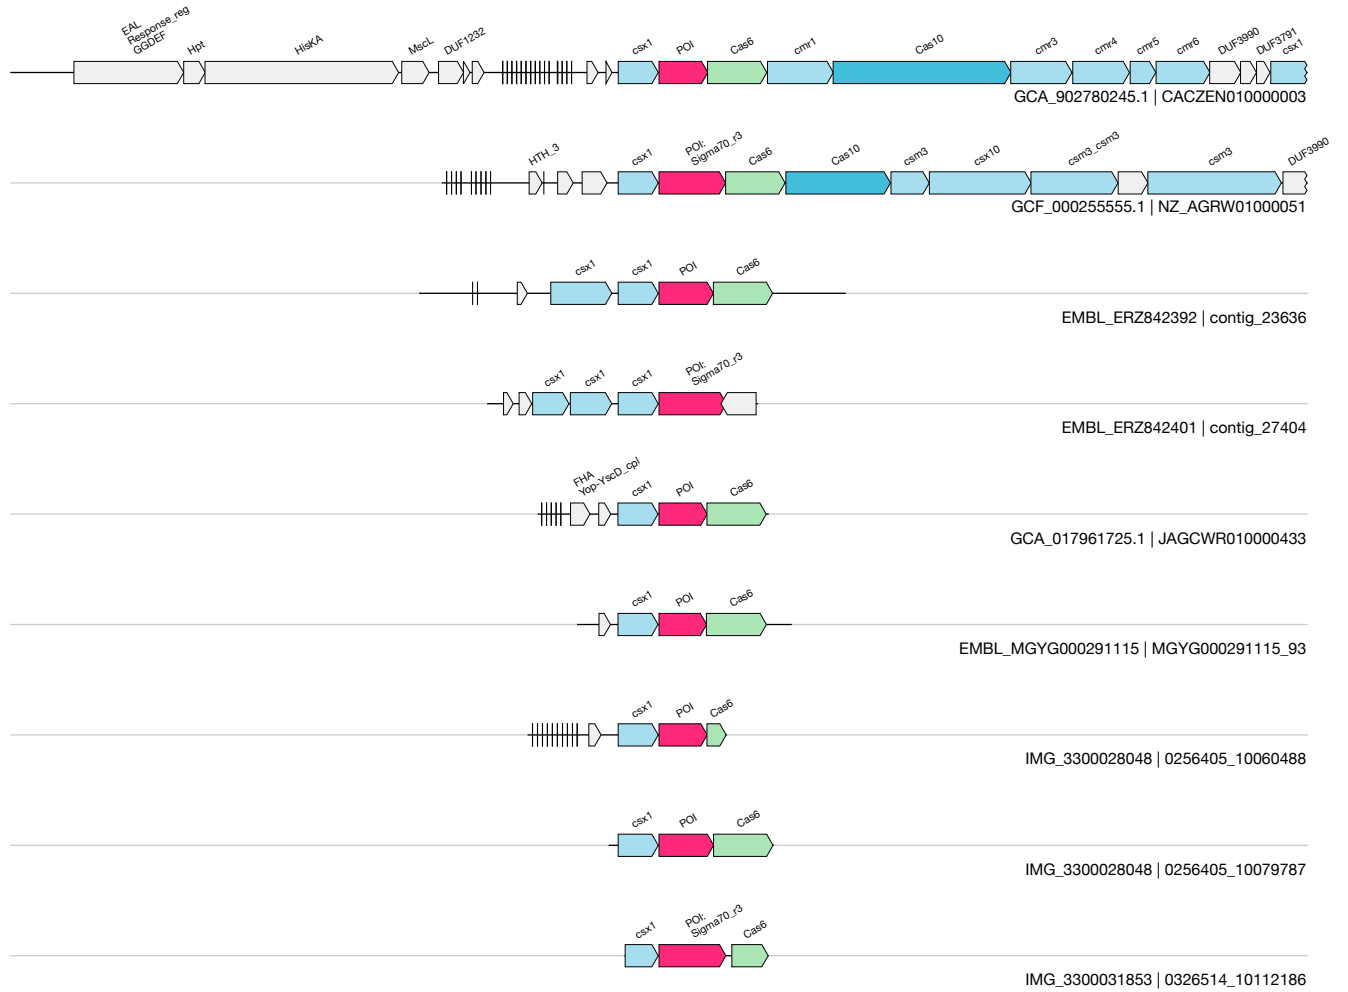

1kb

CI

UAS-19  
Auxiliary

(Cas9 or Cas12 associated WYL)  
EMBL\_MGYG000290606&MGYG000290606\_2&&40\_988\_-1

19 / 35.1

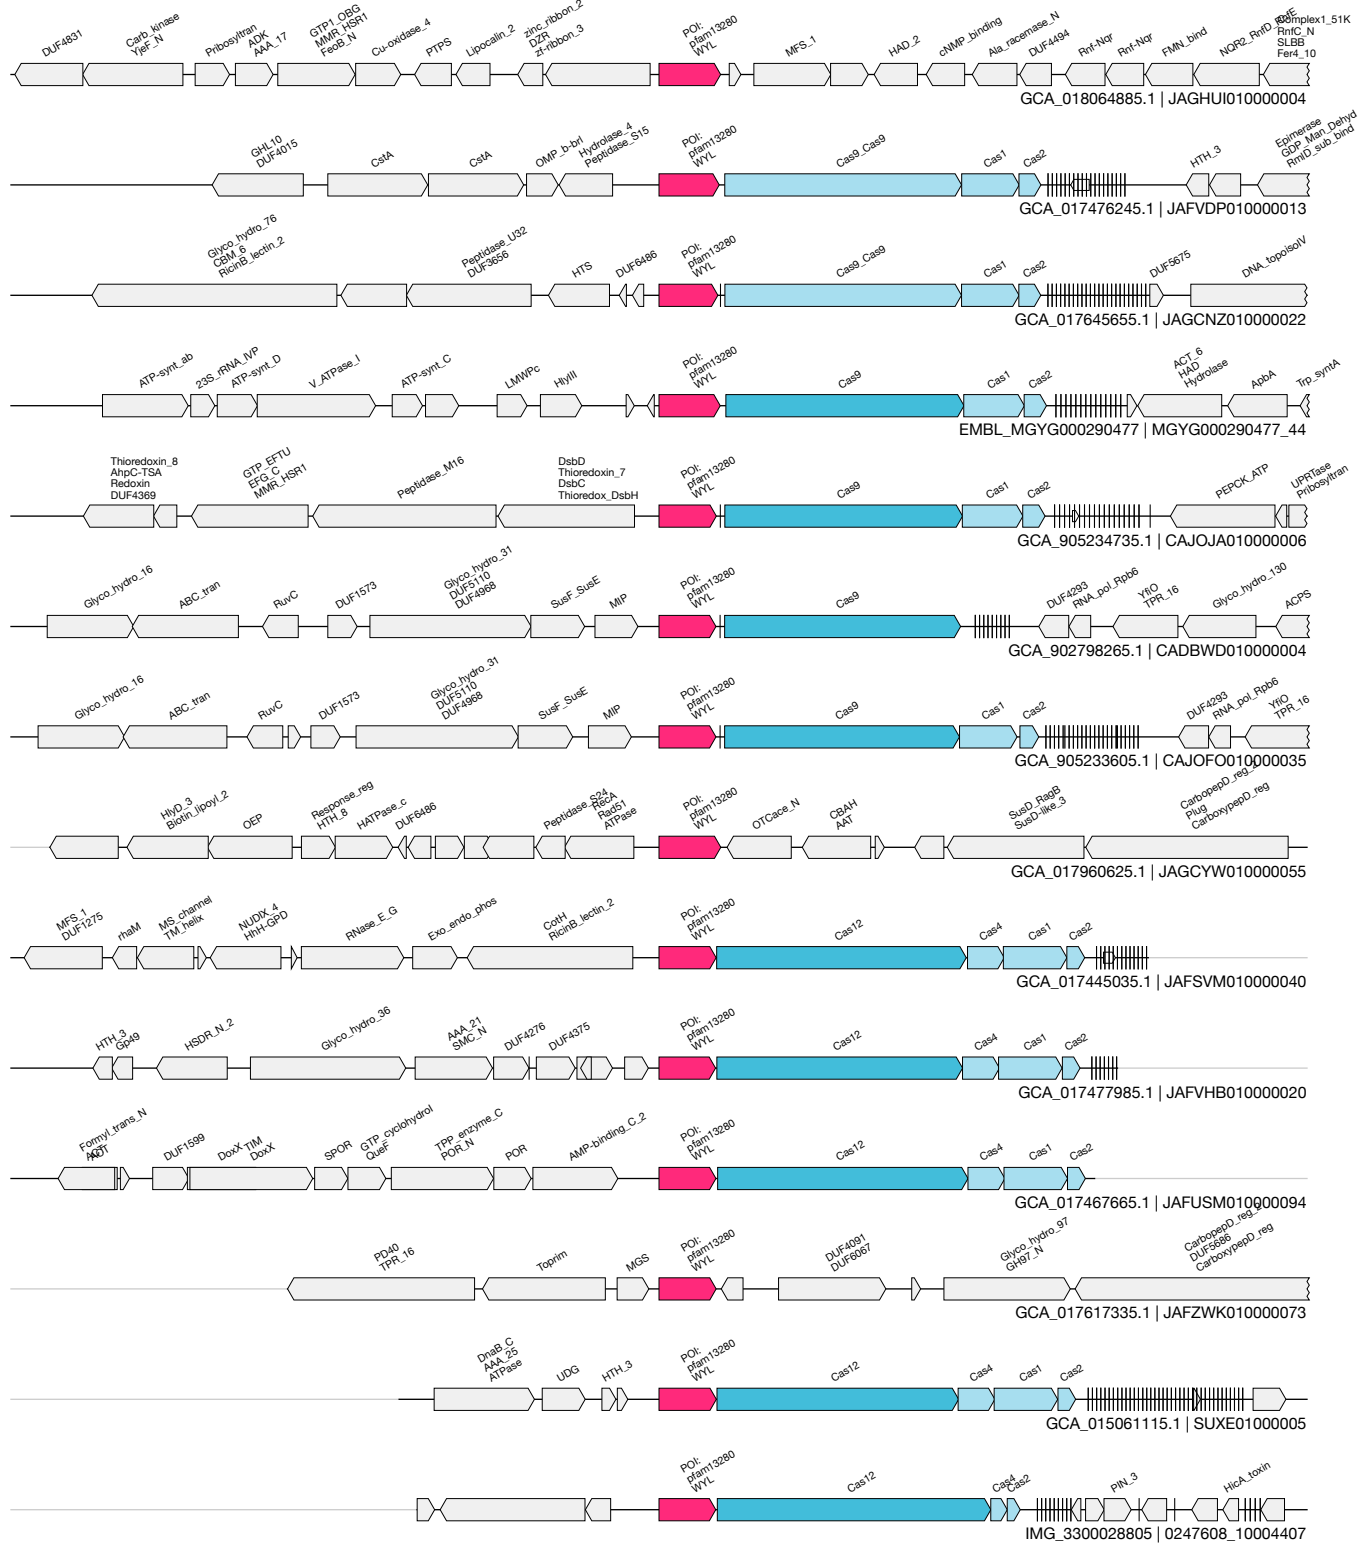

1kb

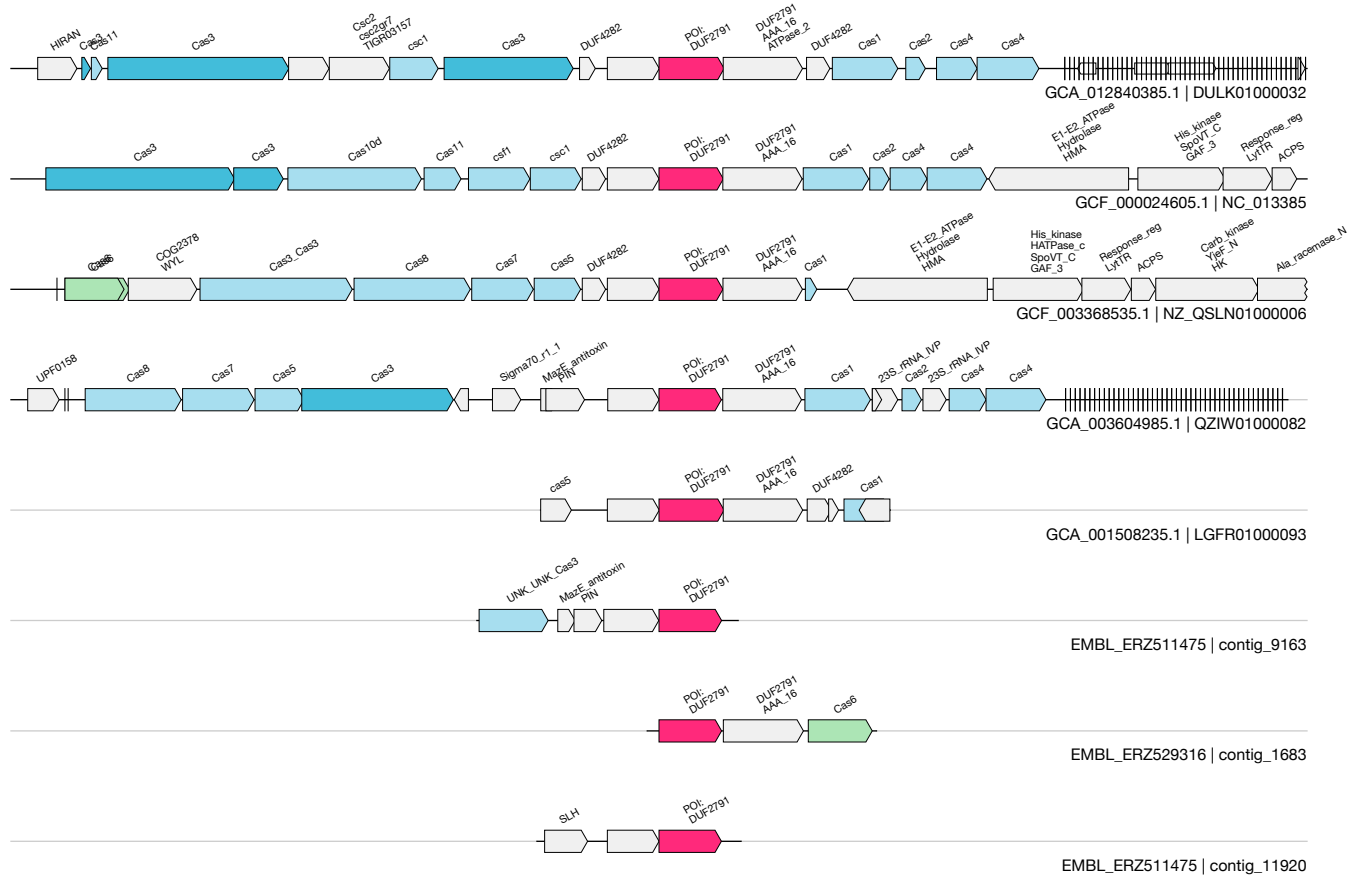

1kb

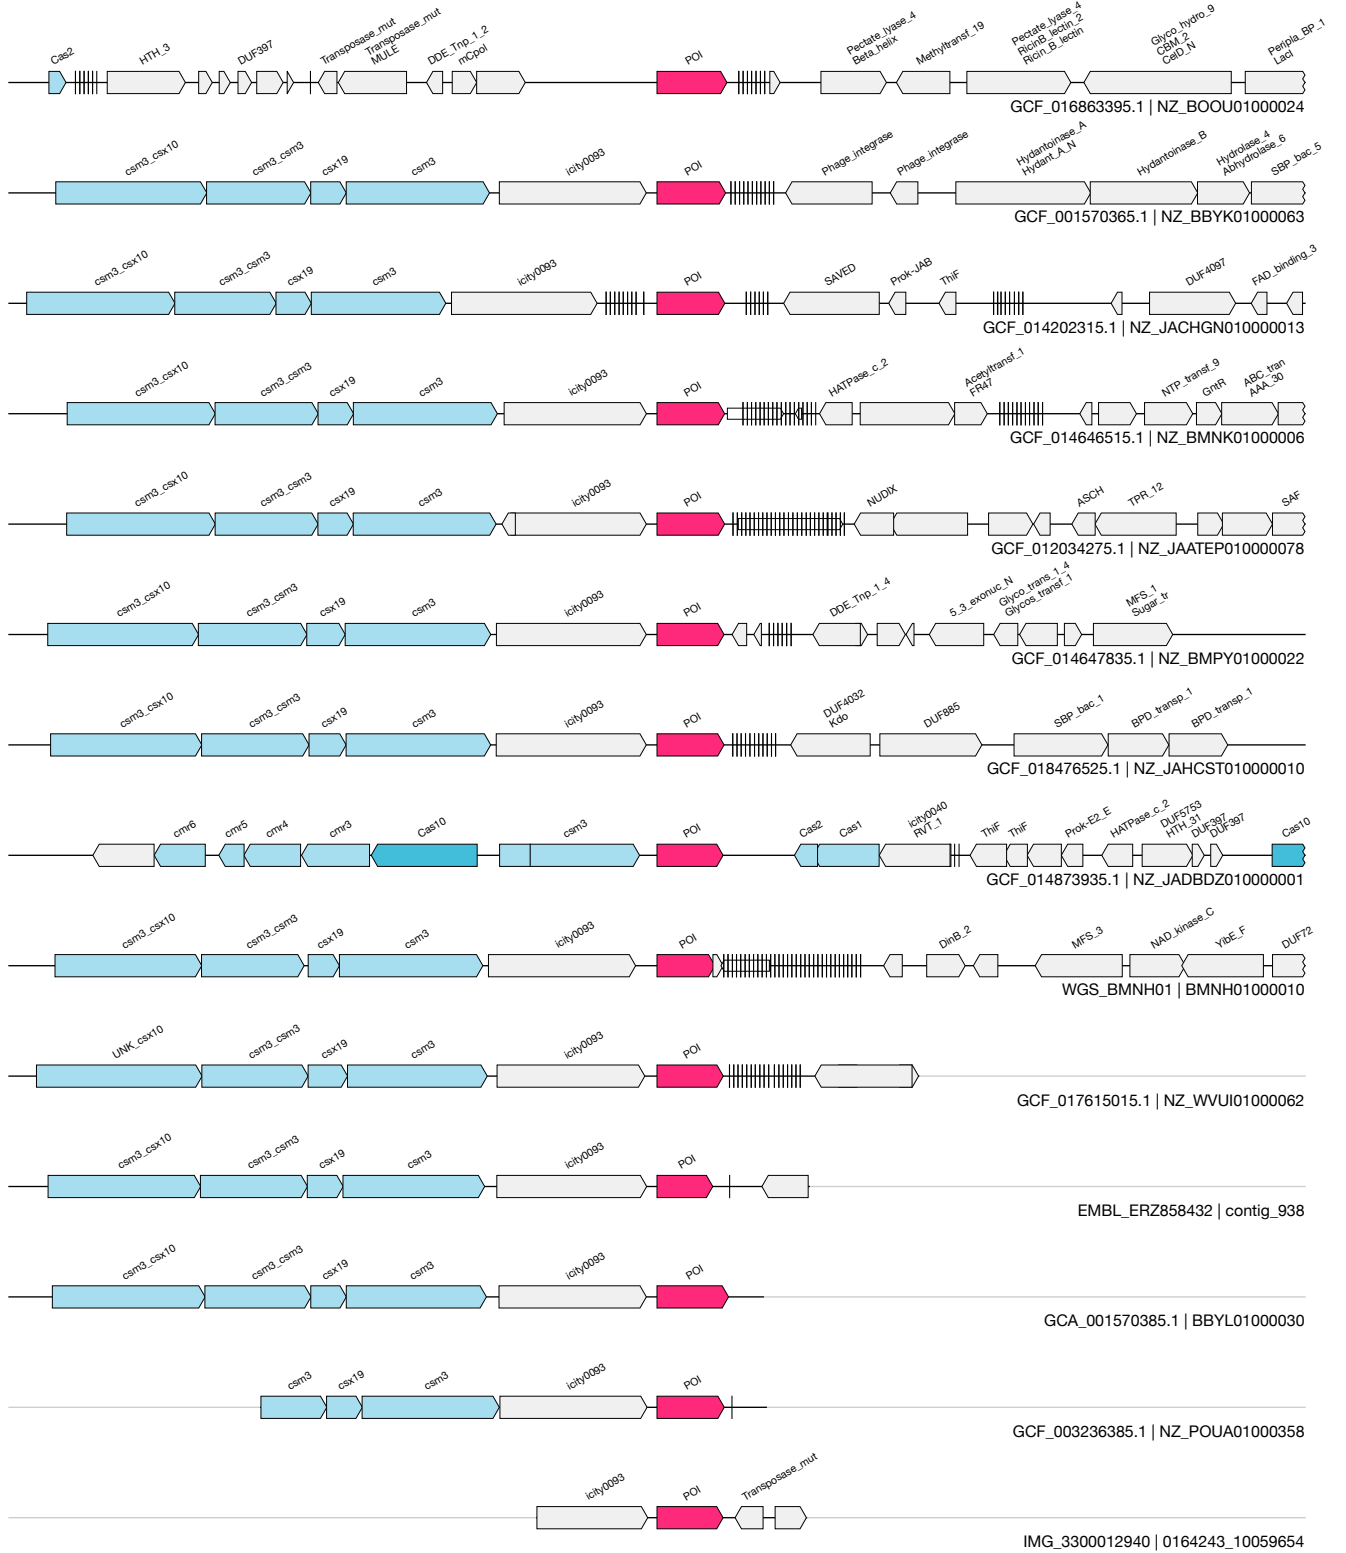

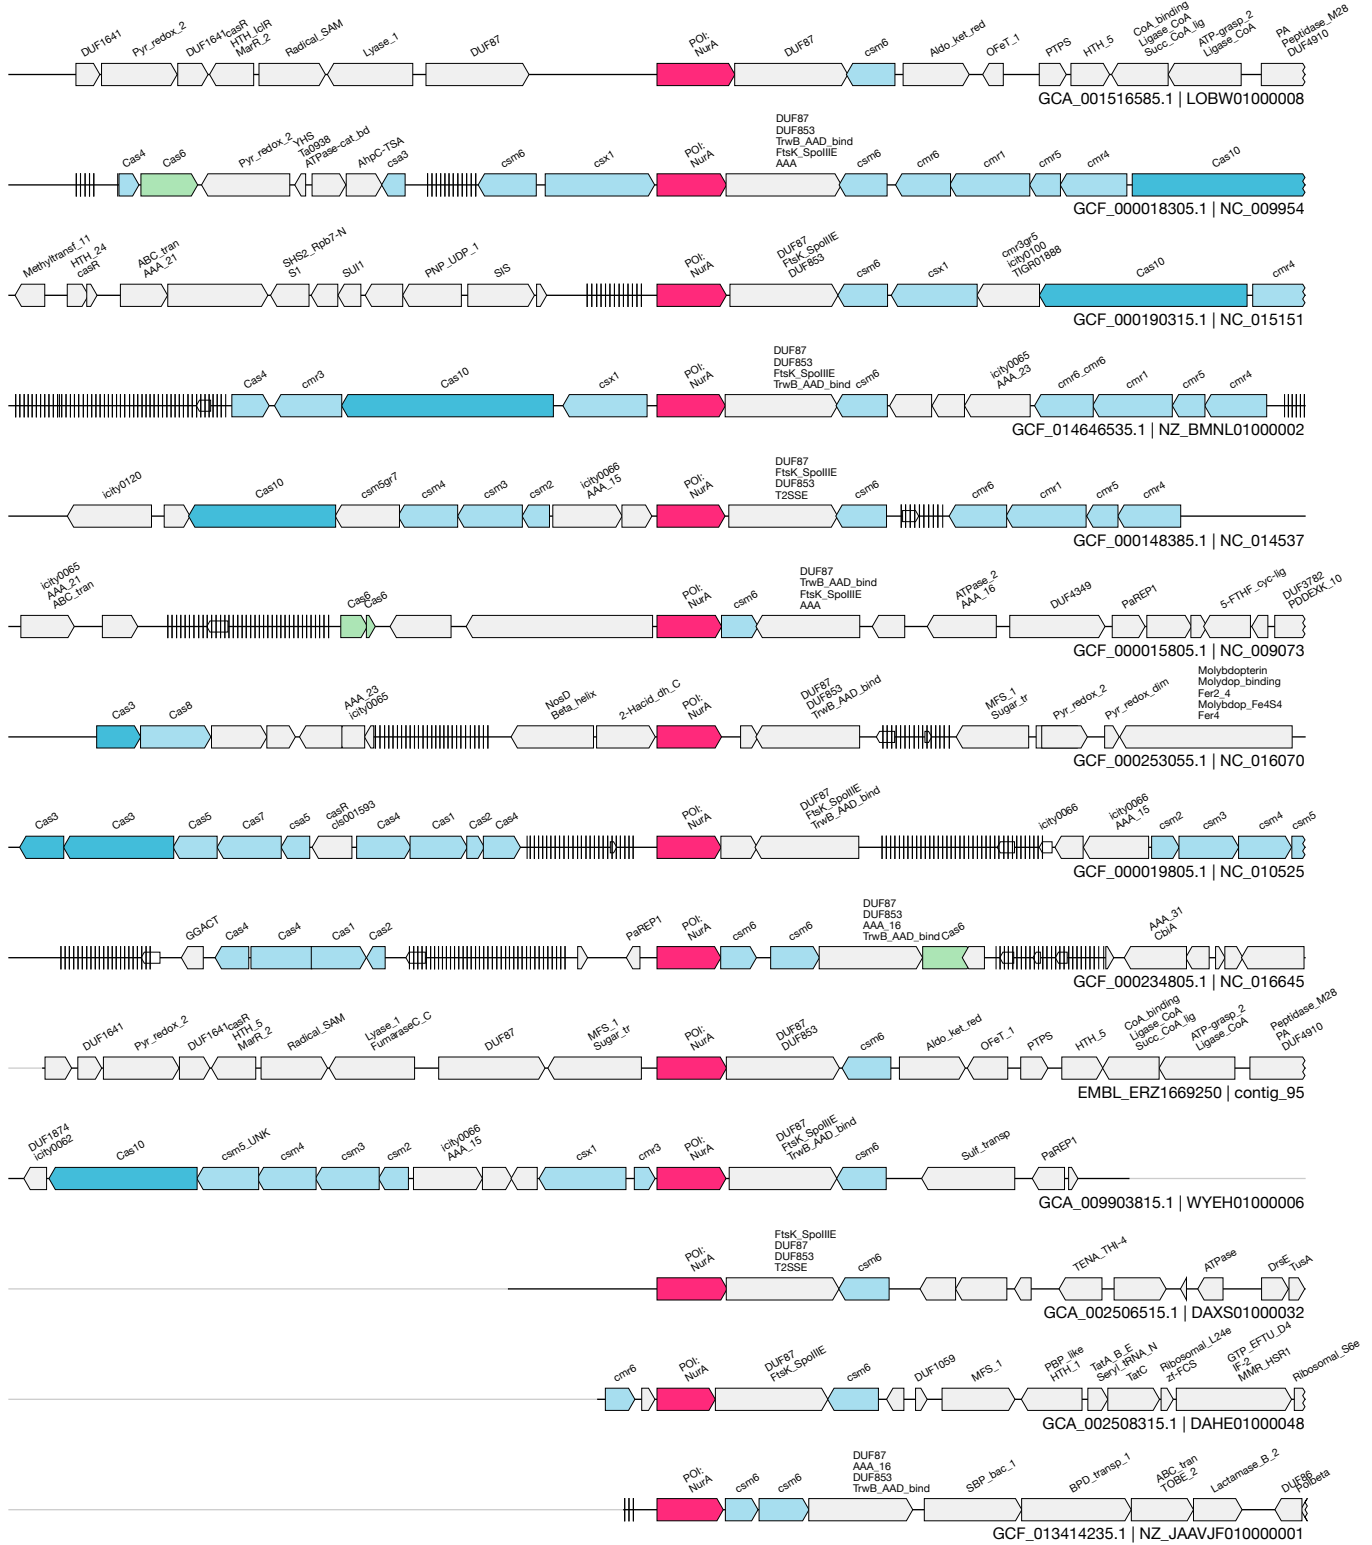

1kb



# CM

**UAS-91**  
Auxiliary

**(vWA + FHA + PP2C)**  
GCA\_011362195.1&&DTDN01000009&&39236\_40742\_-1

3 / 6.8

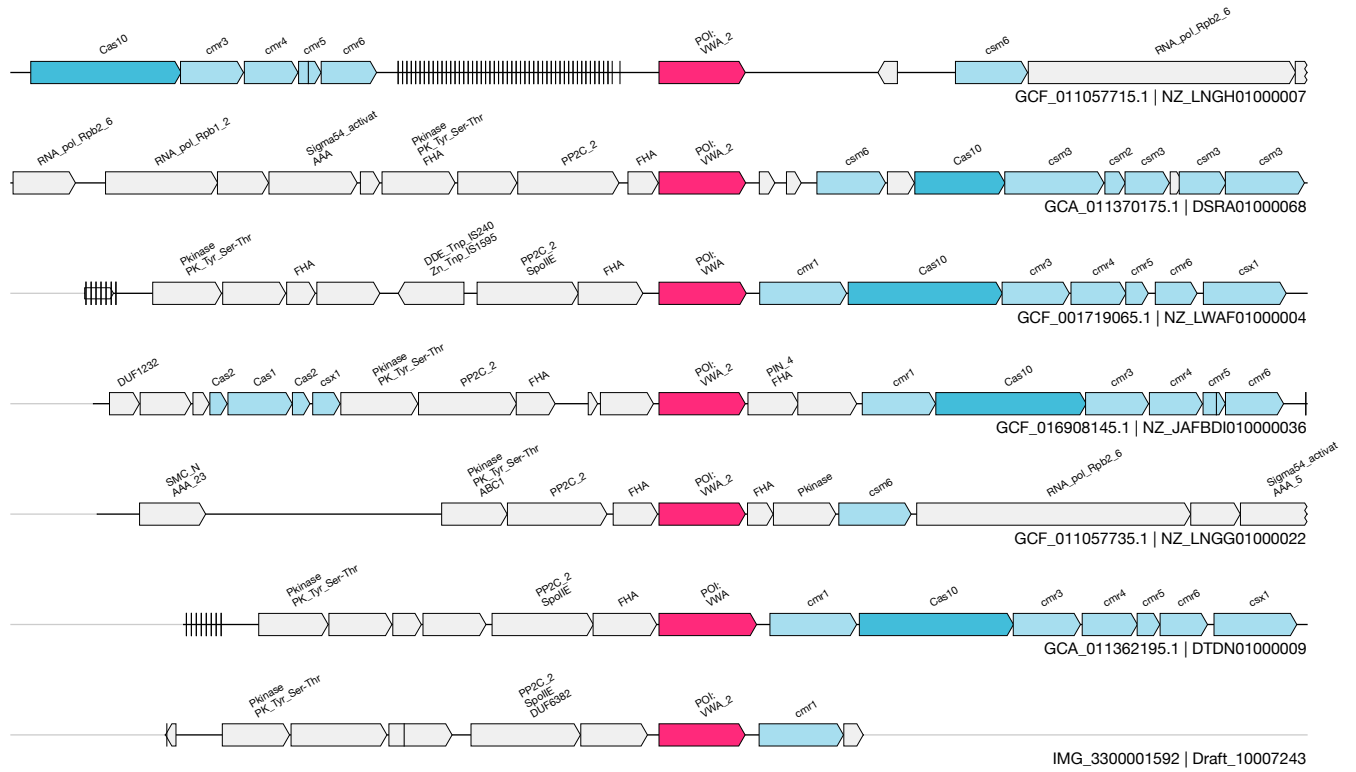

1kb

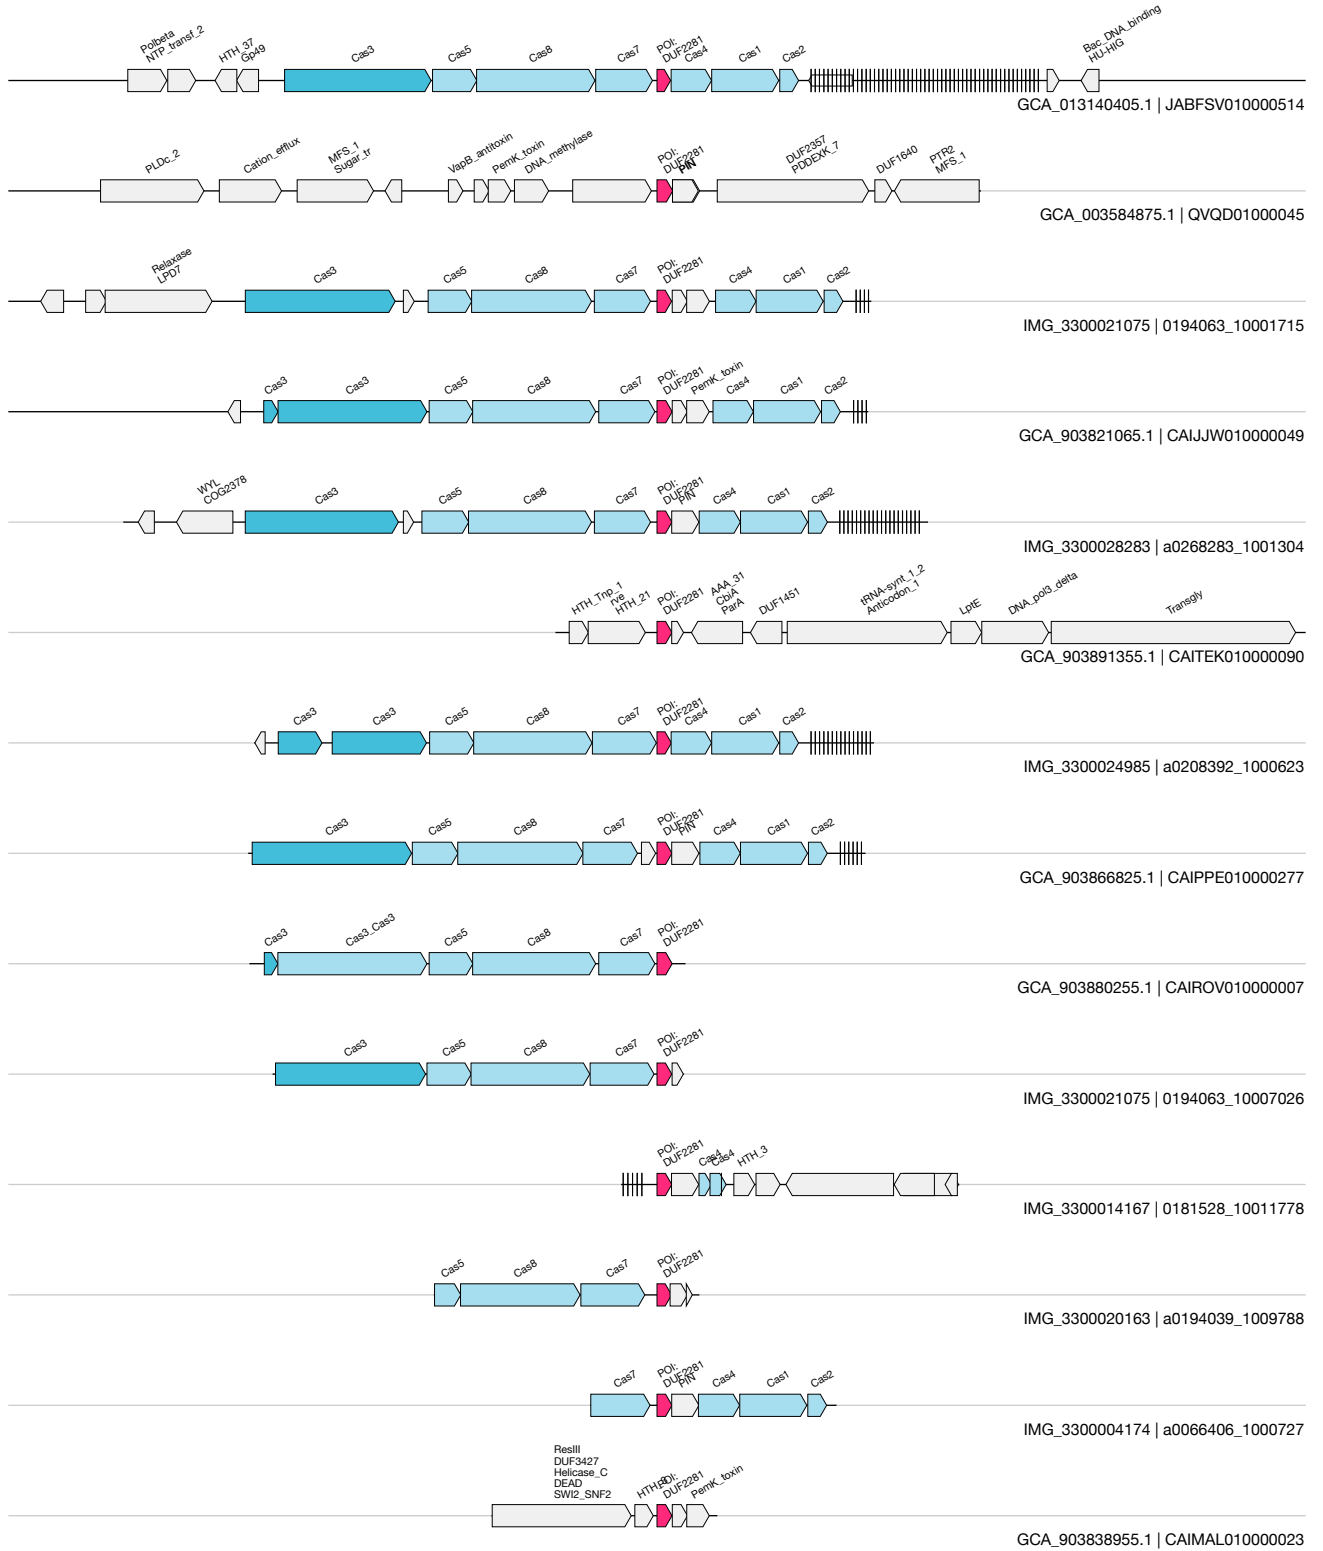

1kb

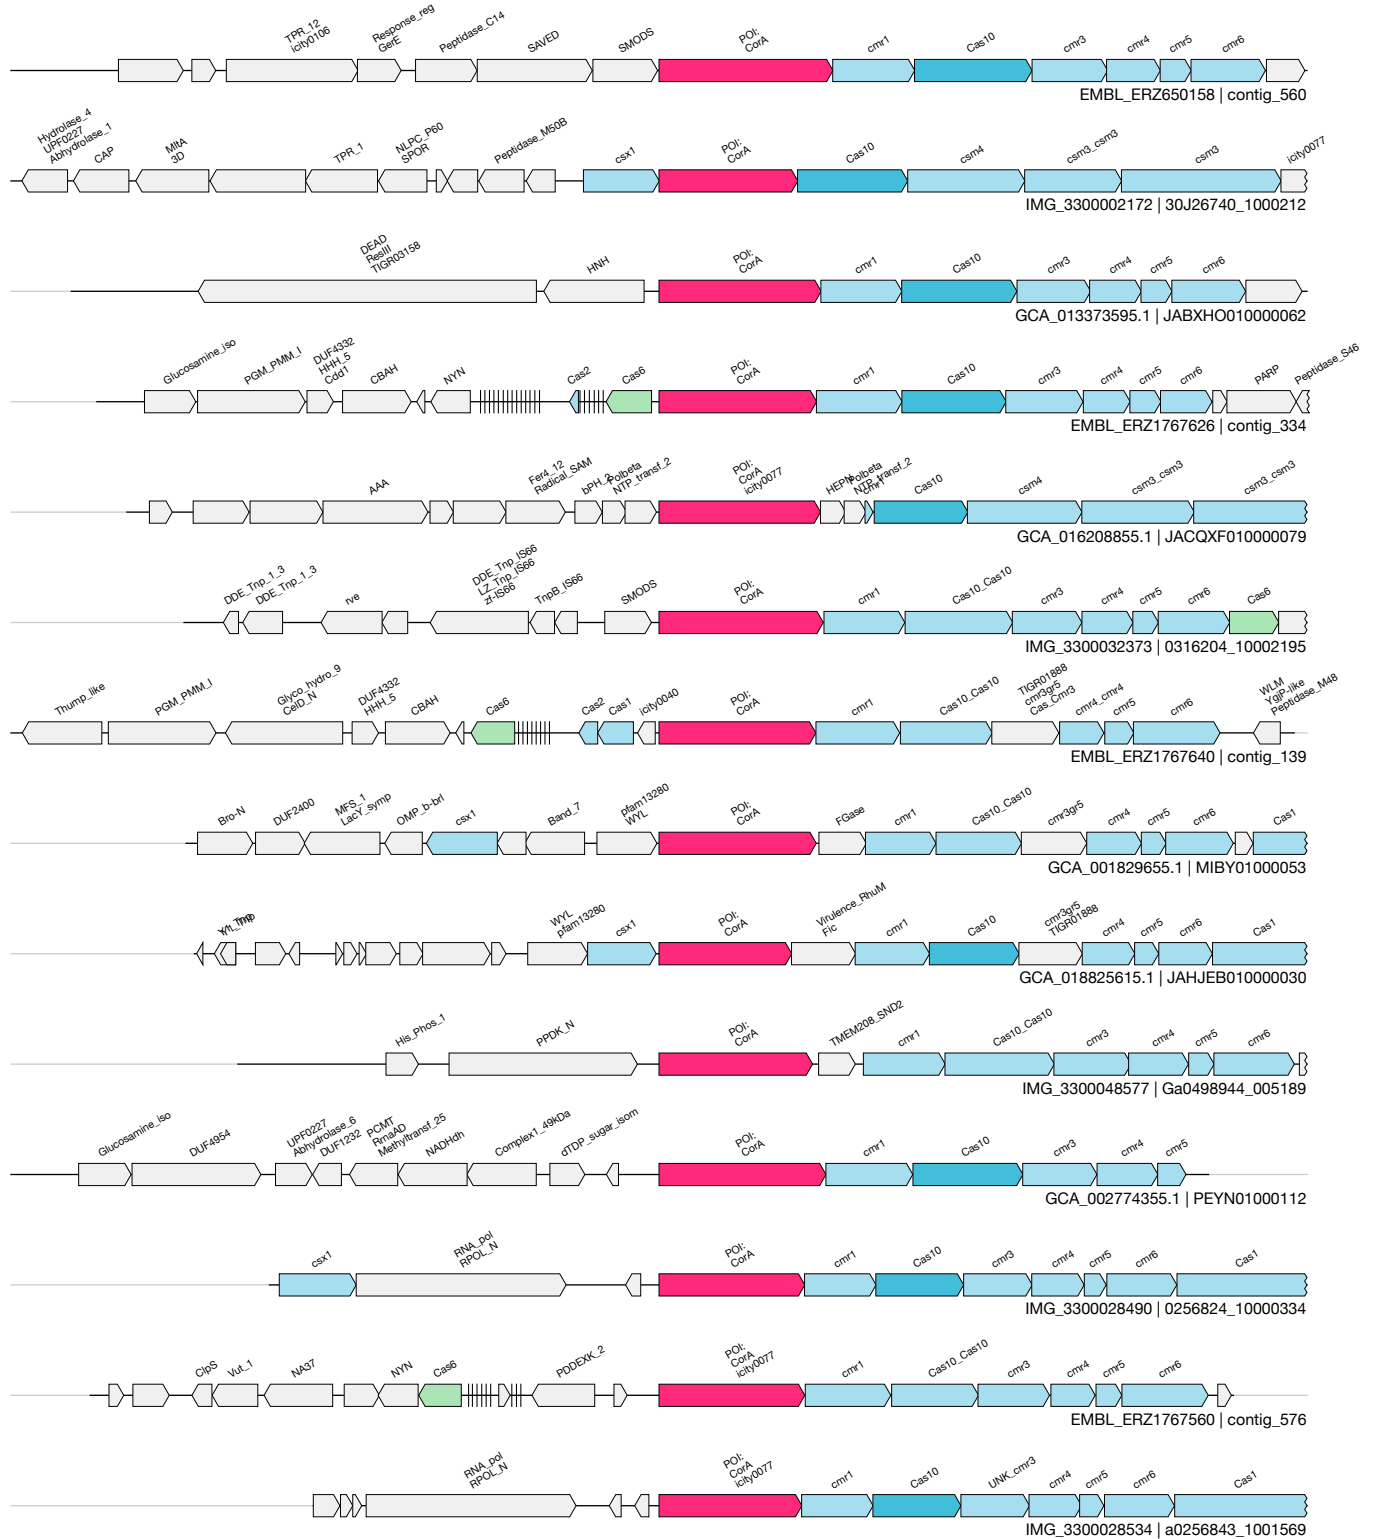

1kb

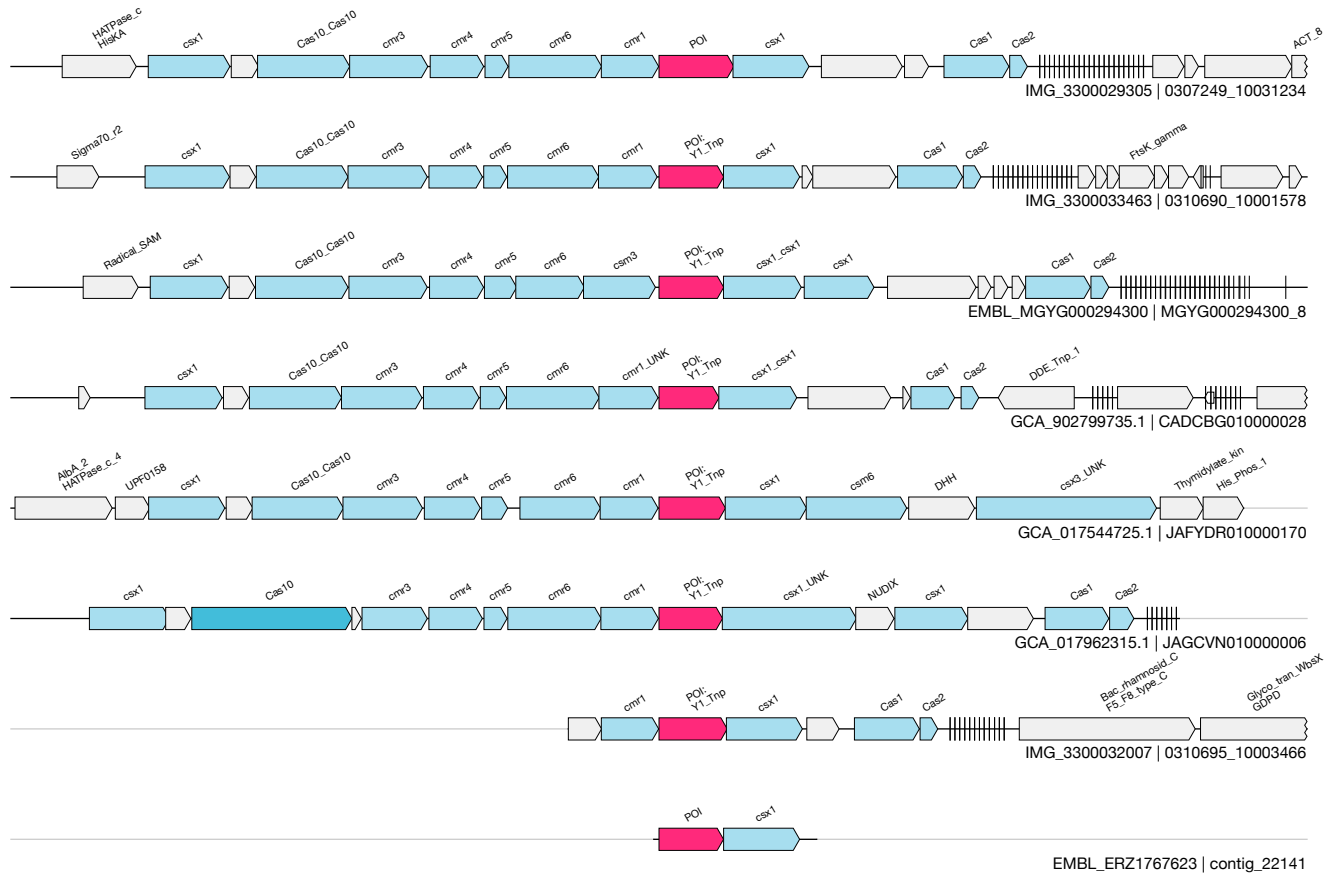

1kb

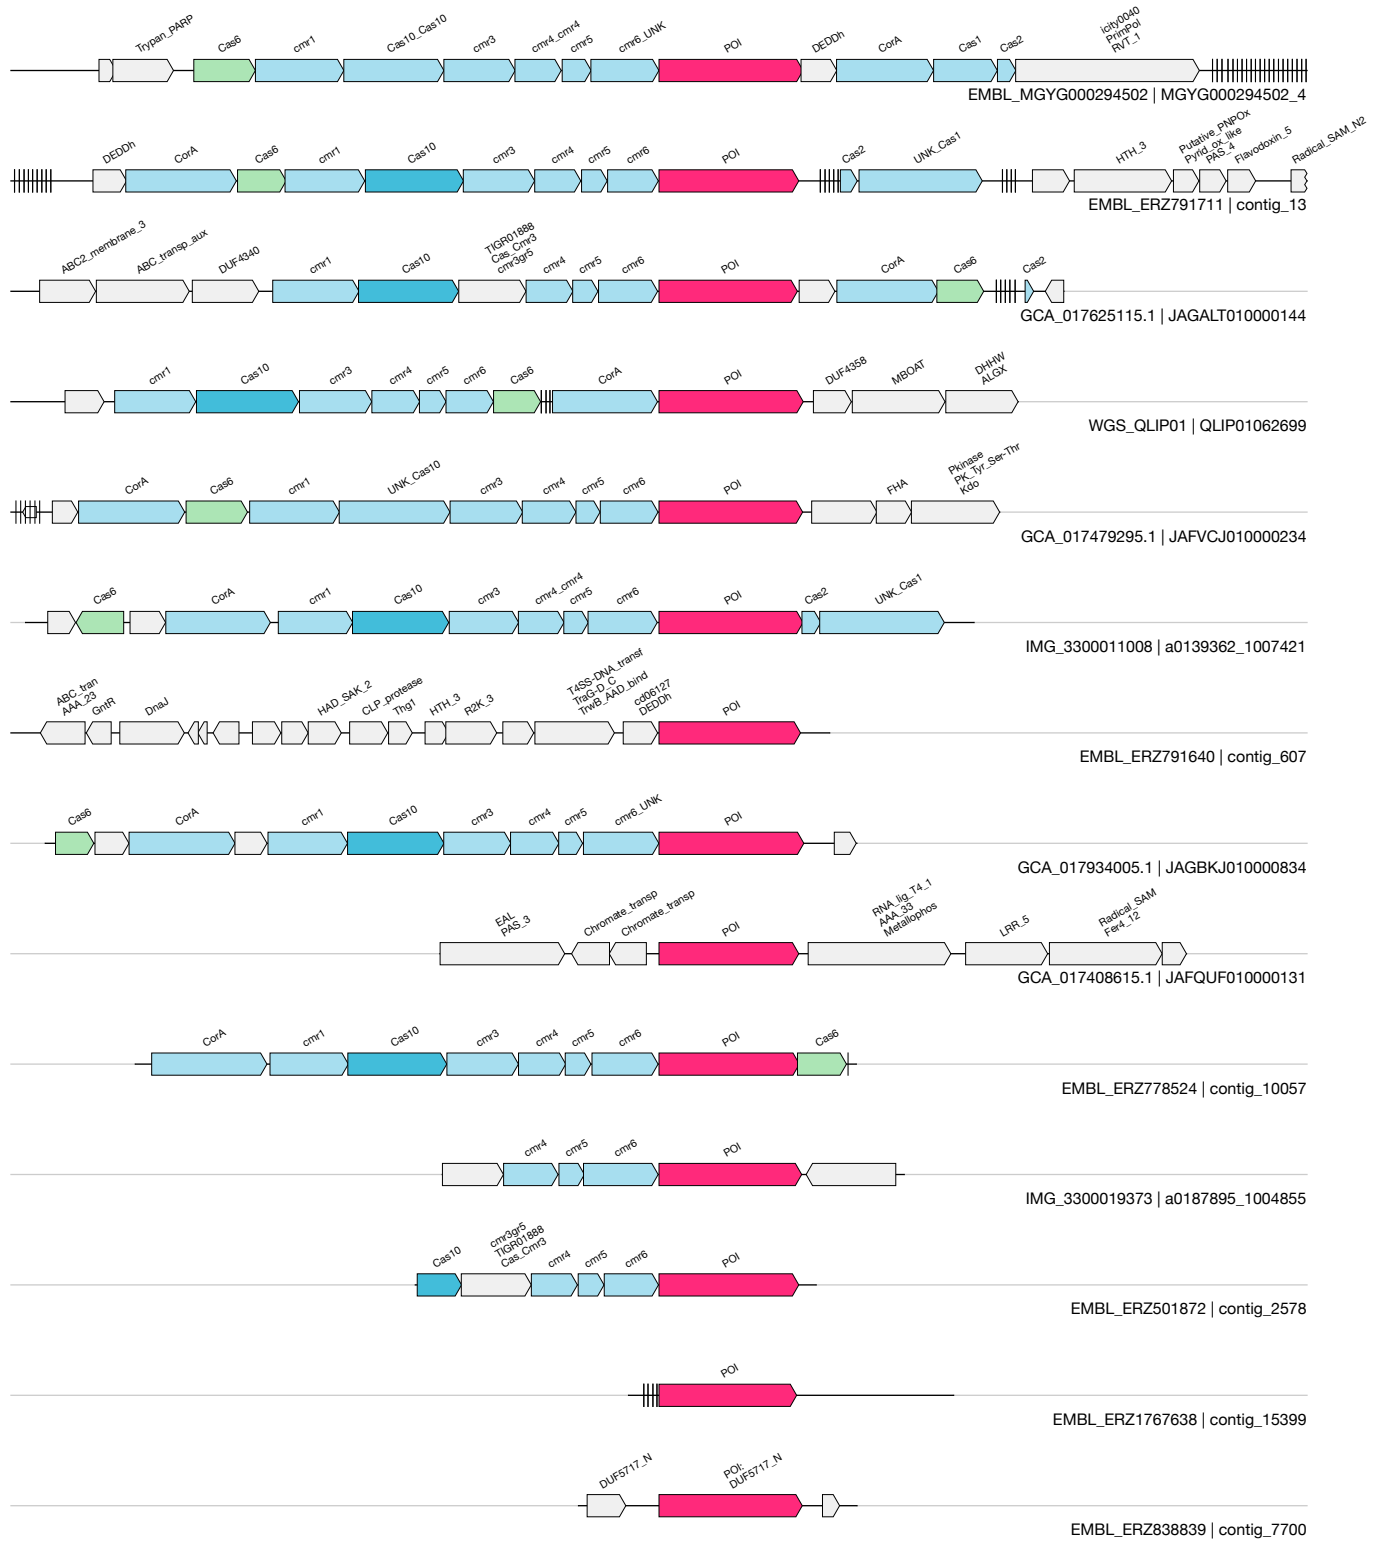

1kb

CR

UAS-95  
Auxiliary

(RAMA + DUF444 + PIN)  
GCA\_019359445.1&&JAHHHJ01000029&&16098\_16602\_1

25 / 34.3

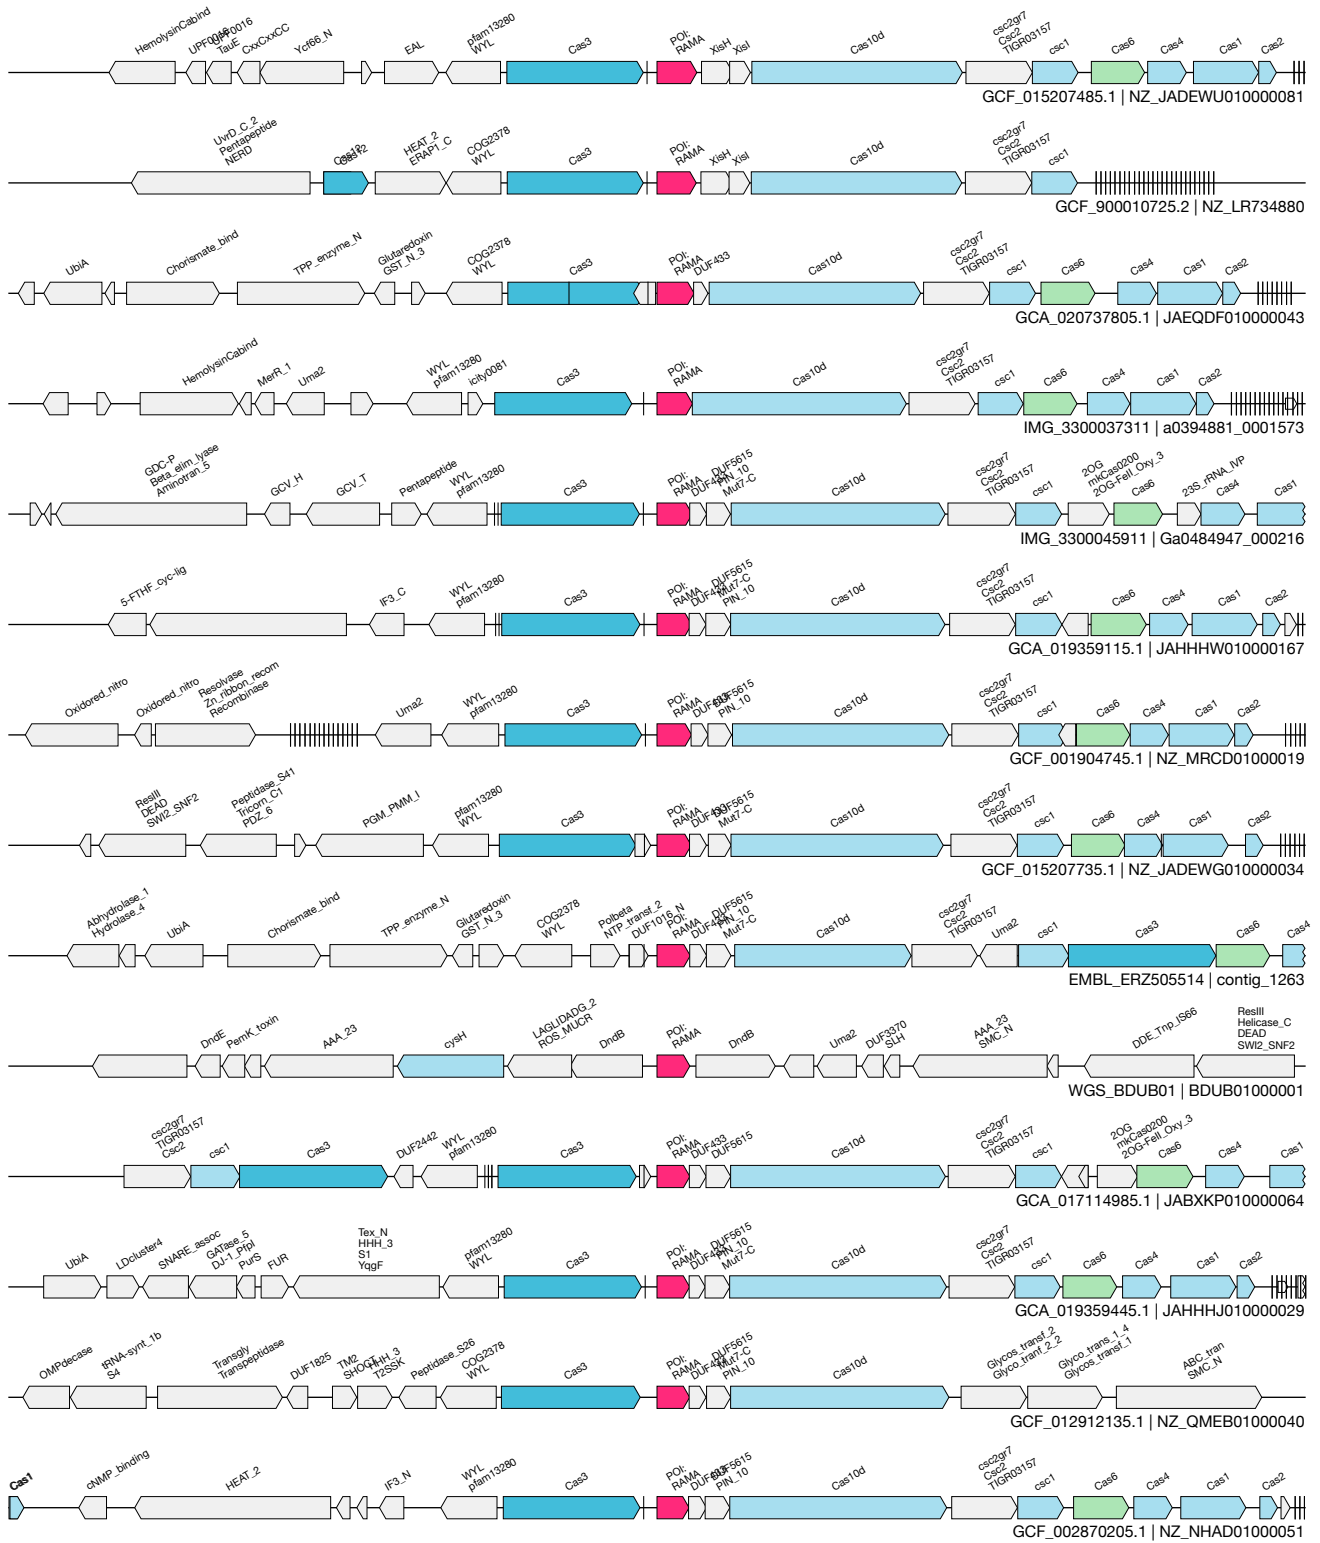

1kb

CS

**UAS-96**  
Auxiliary

**(unknown transmembrane protein)**  
GCA\_020434175.1&&JAGRBH010000503&&340\_1450\_-1

N/A

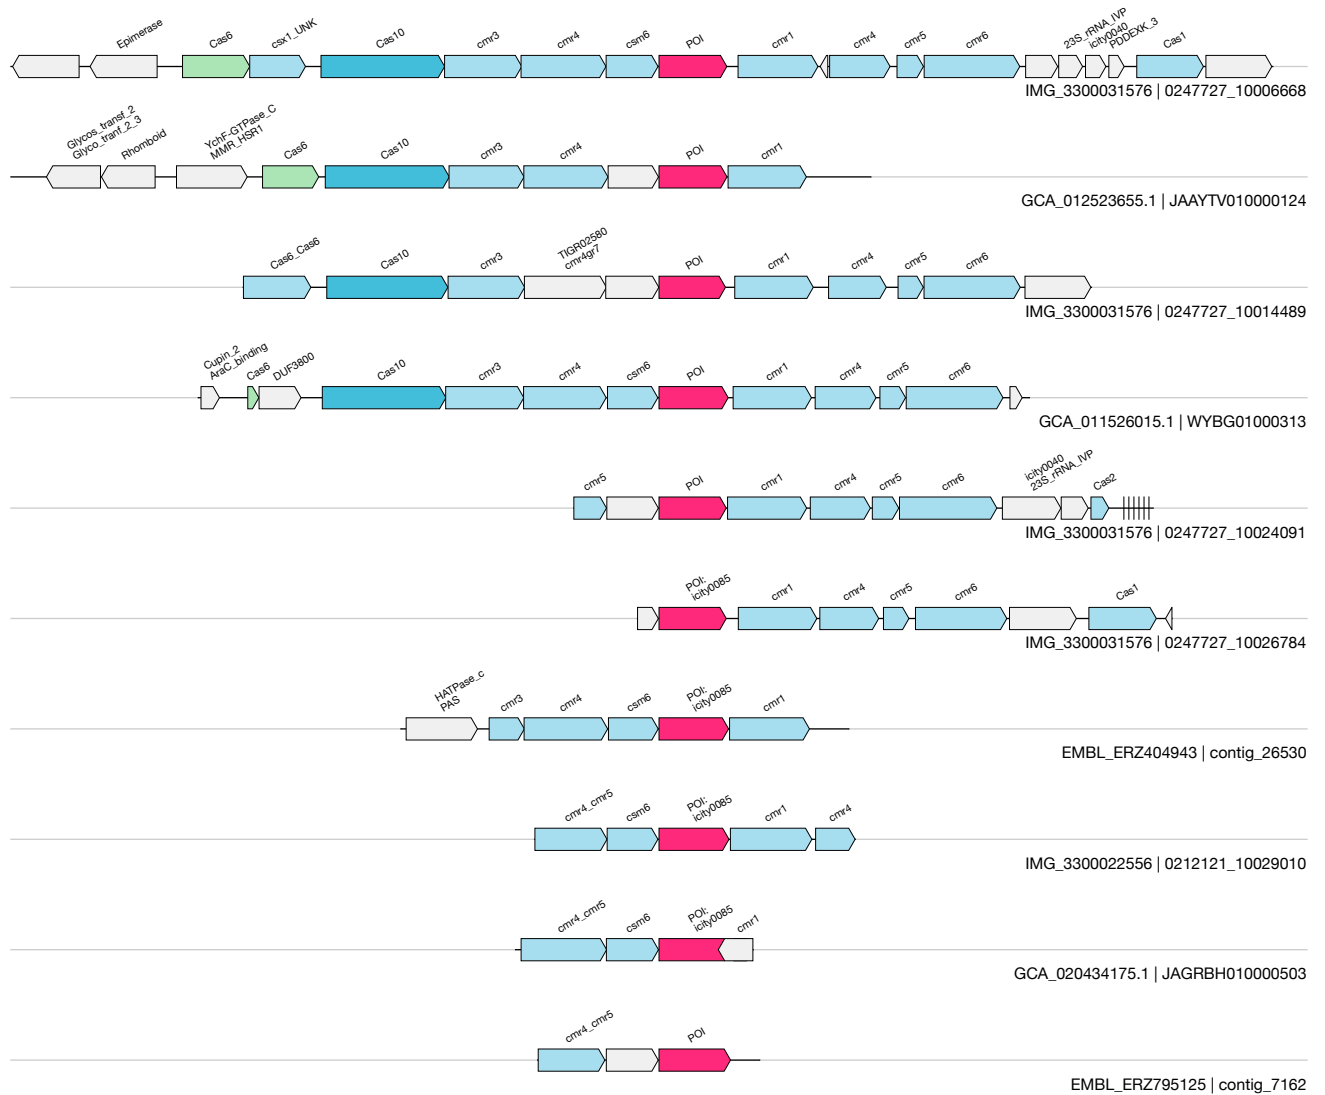

1kb

CT

**UAS-97**  
Auxiliary

**(Fic Cascade)**  
GCA\_903847485.1&&CAINDV010000696&&9392\_10559\_-1

2 / 4.2

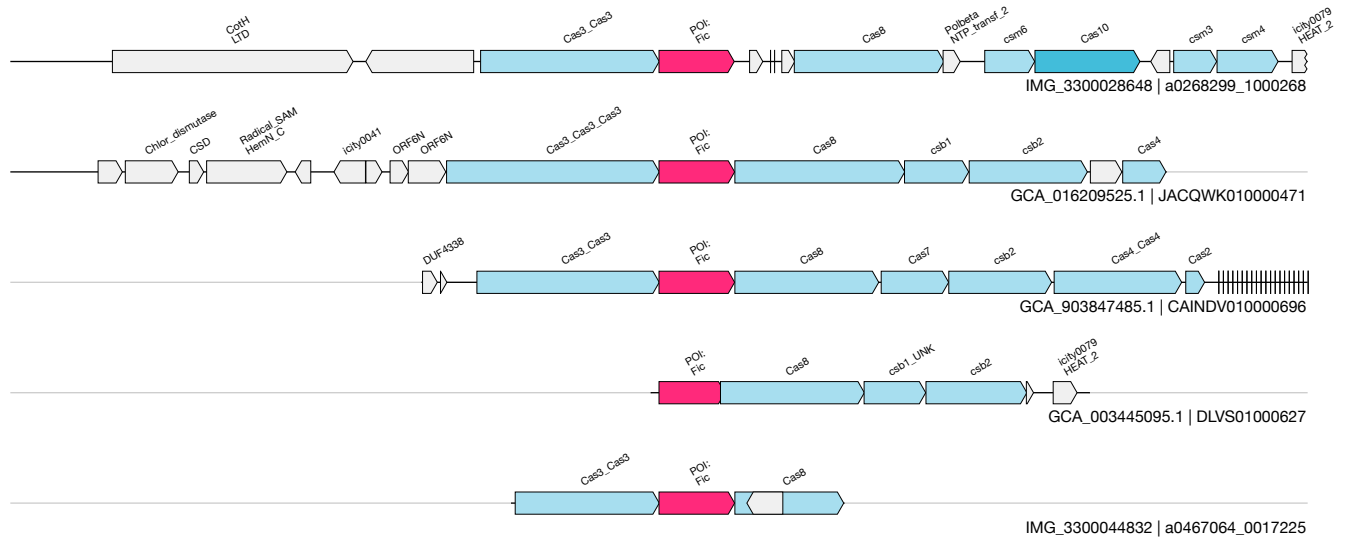

1kb



# CU

**UAS-98**  
Auxiliary

**(TPR\_MALT)**

5 / 6.3

GCA\_910584945.1&&CAJUDY010000014&&24554\_26873\_1

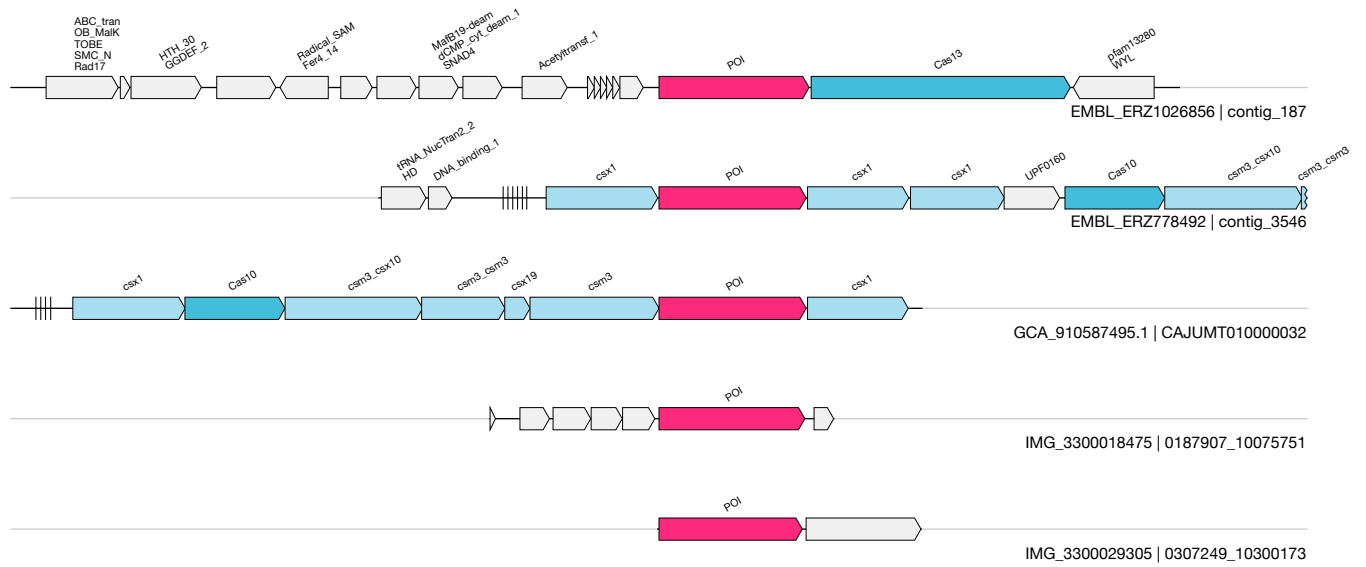

1kb

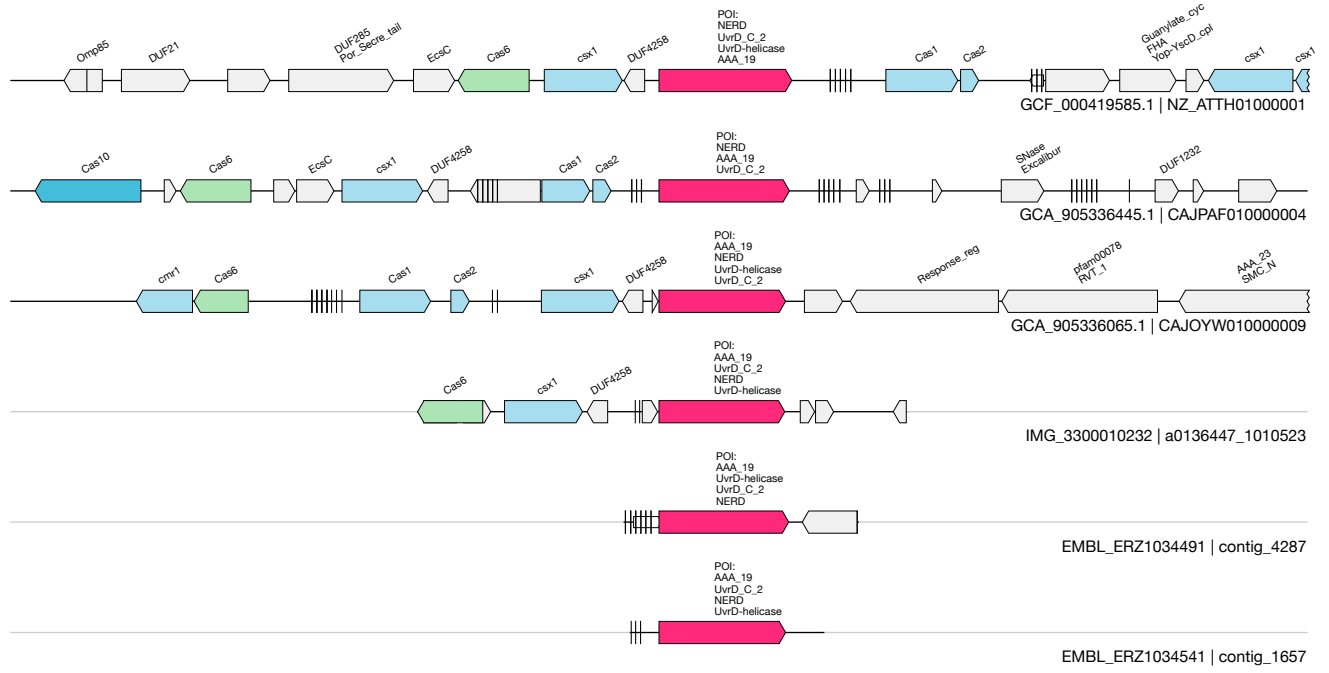

1kb

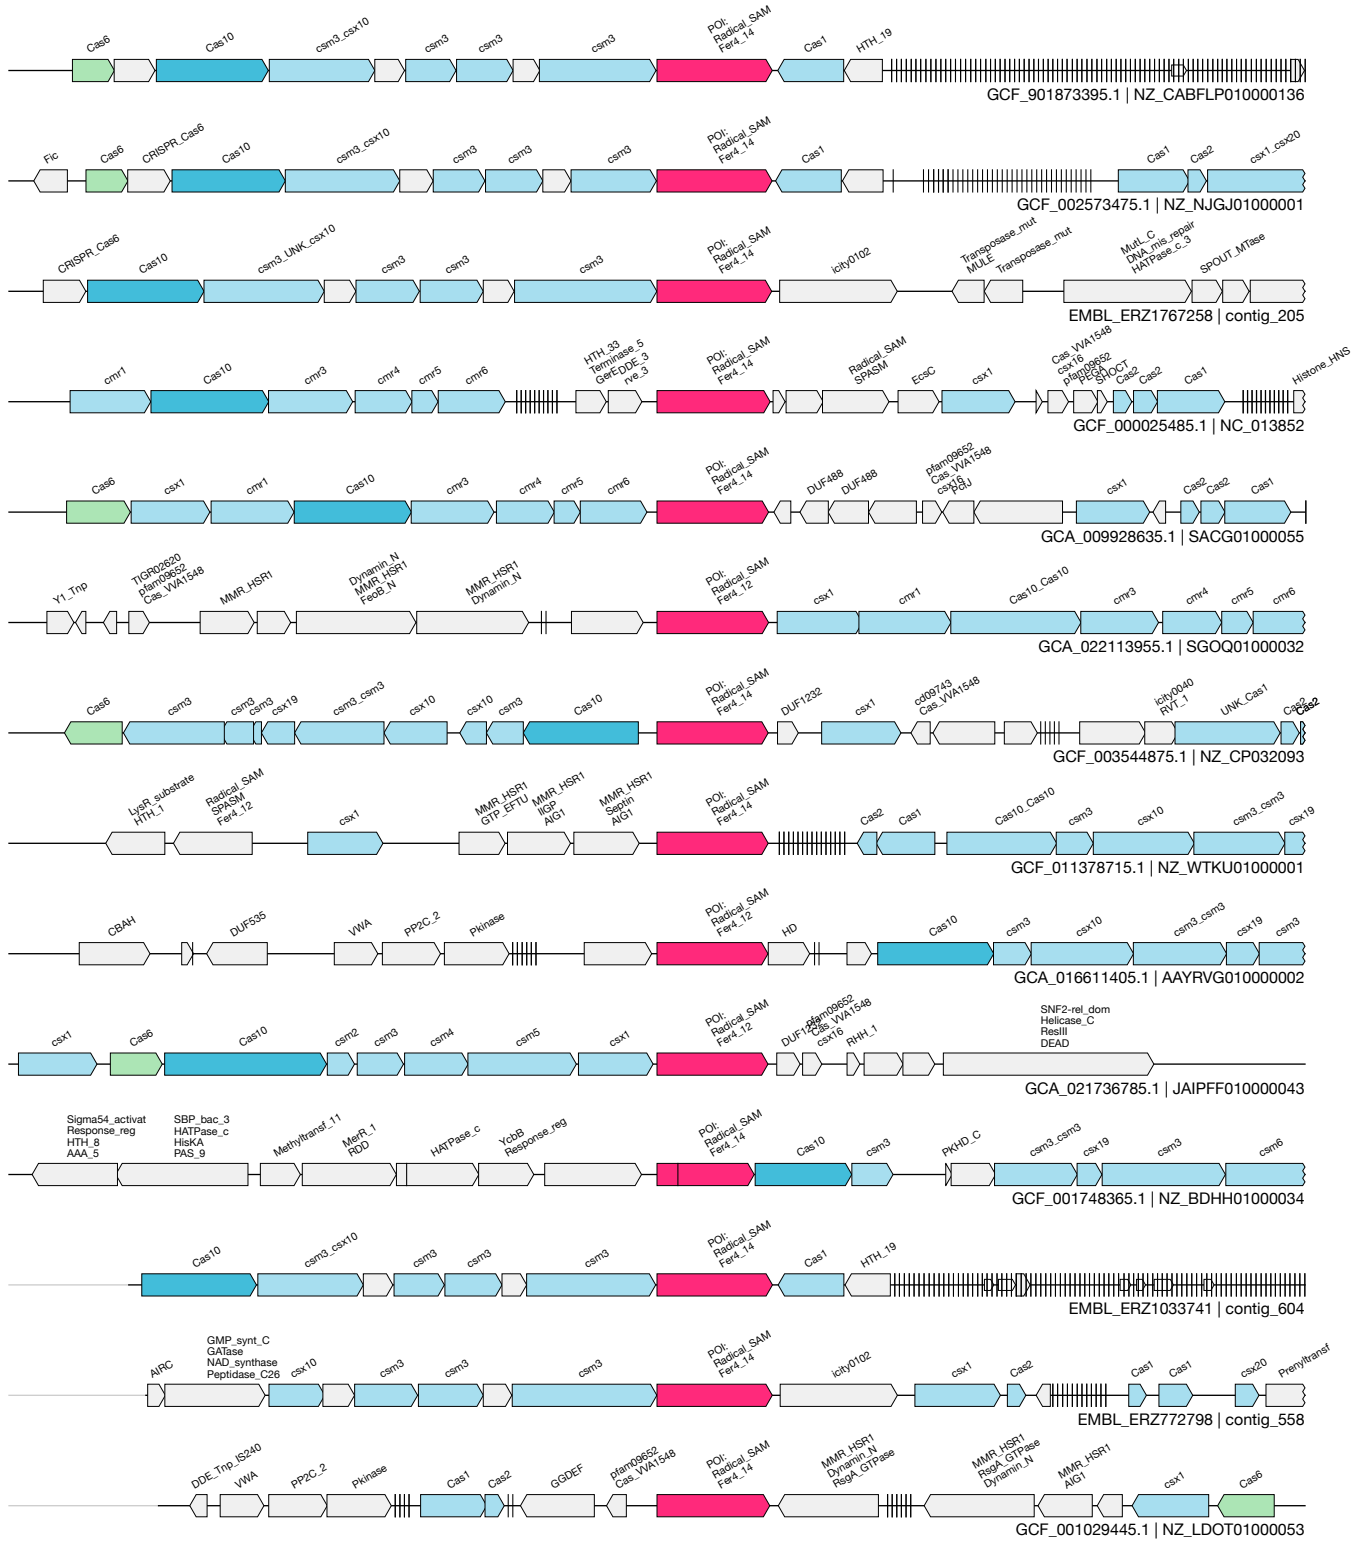

1kb

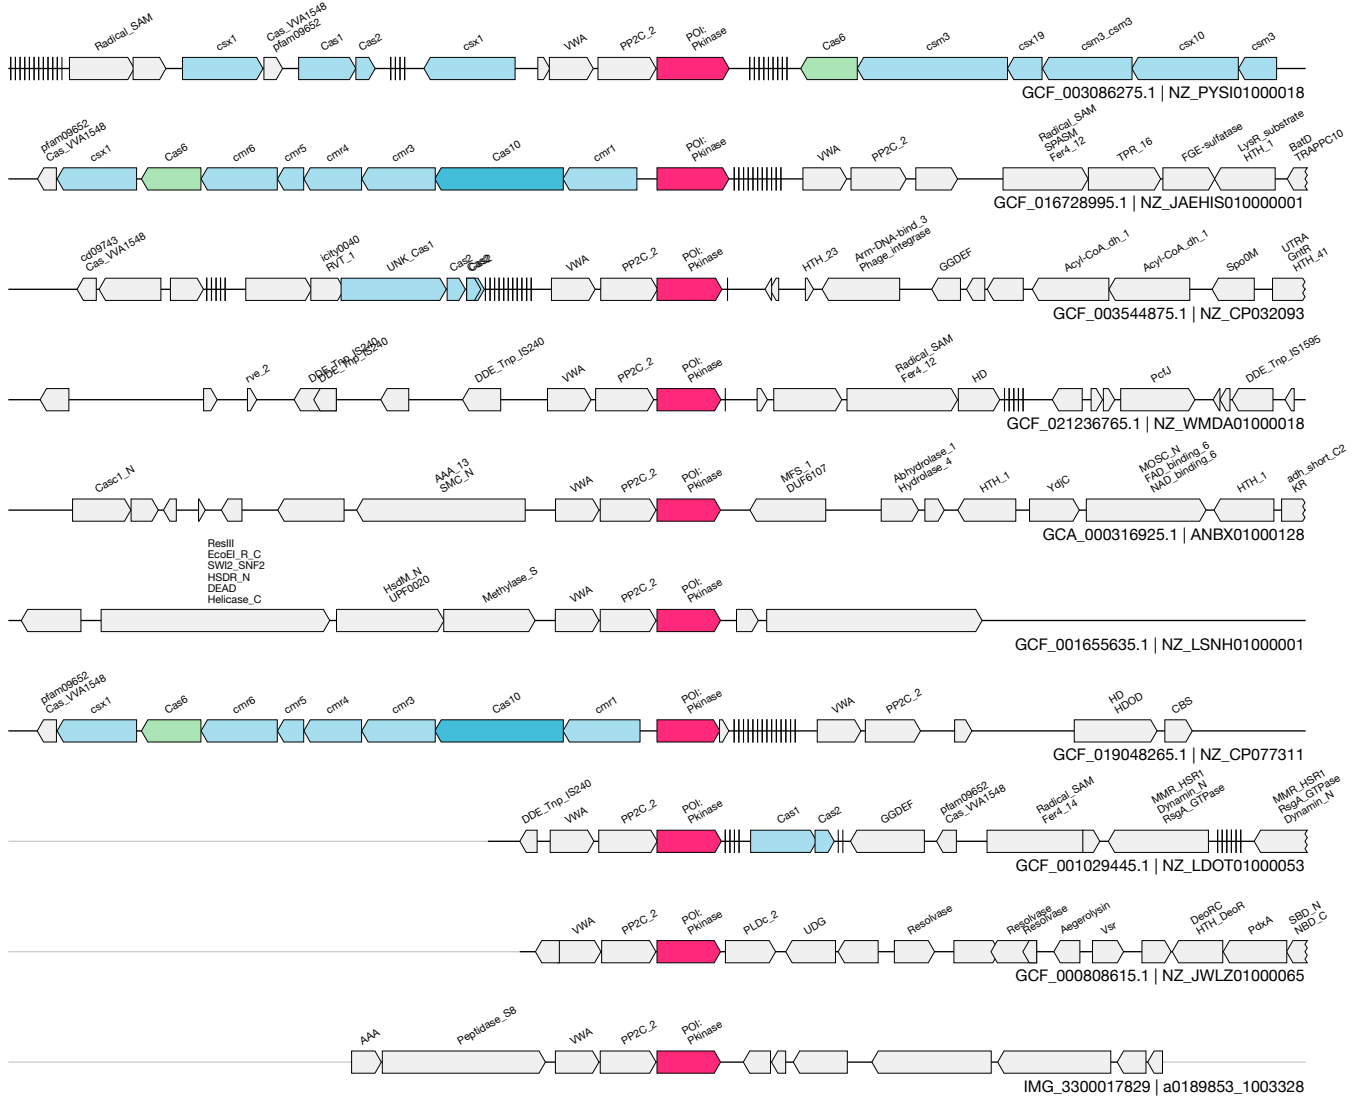

1kb

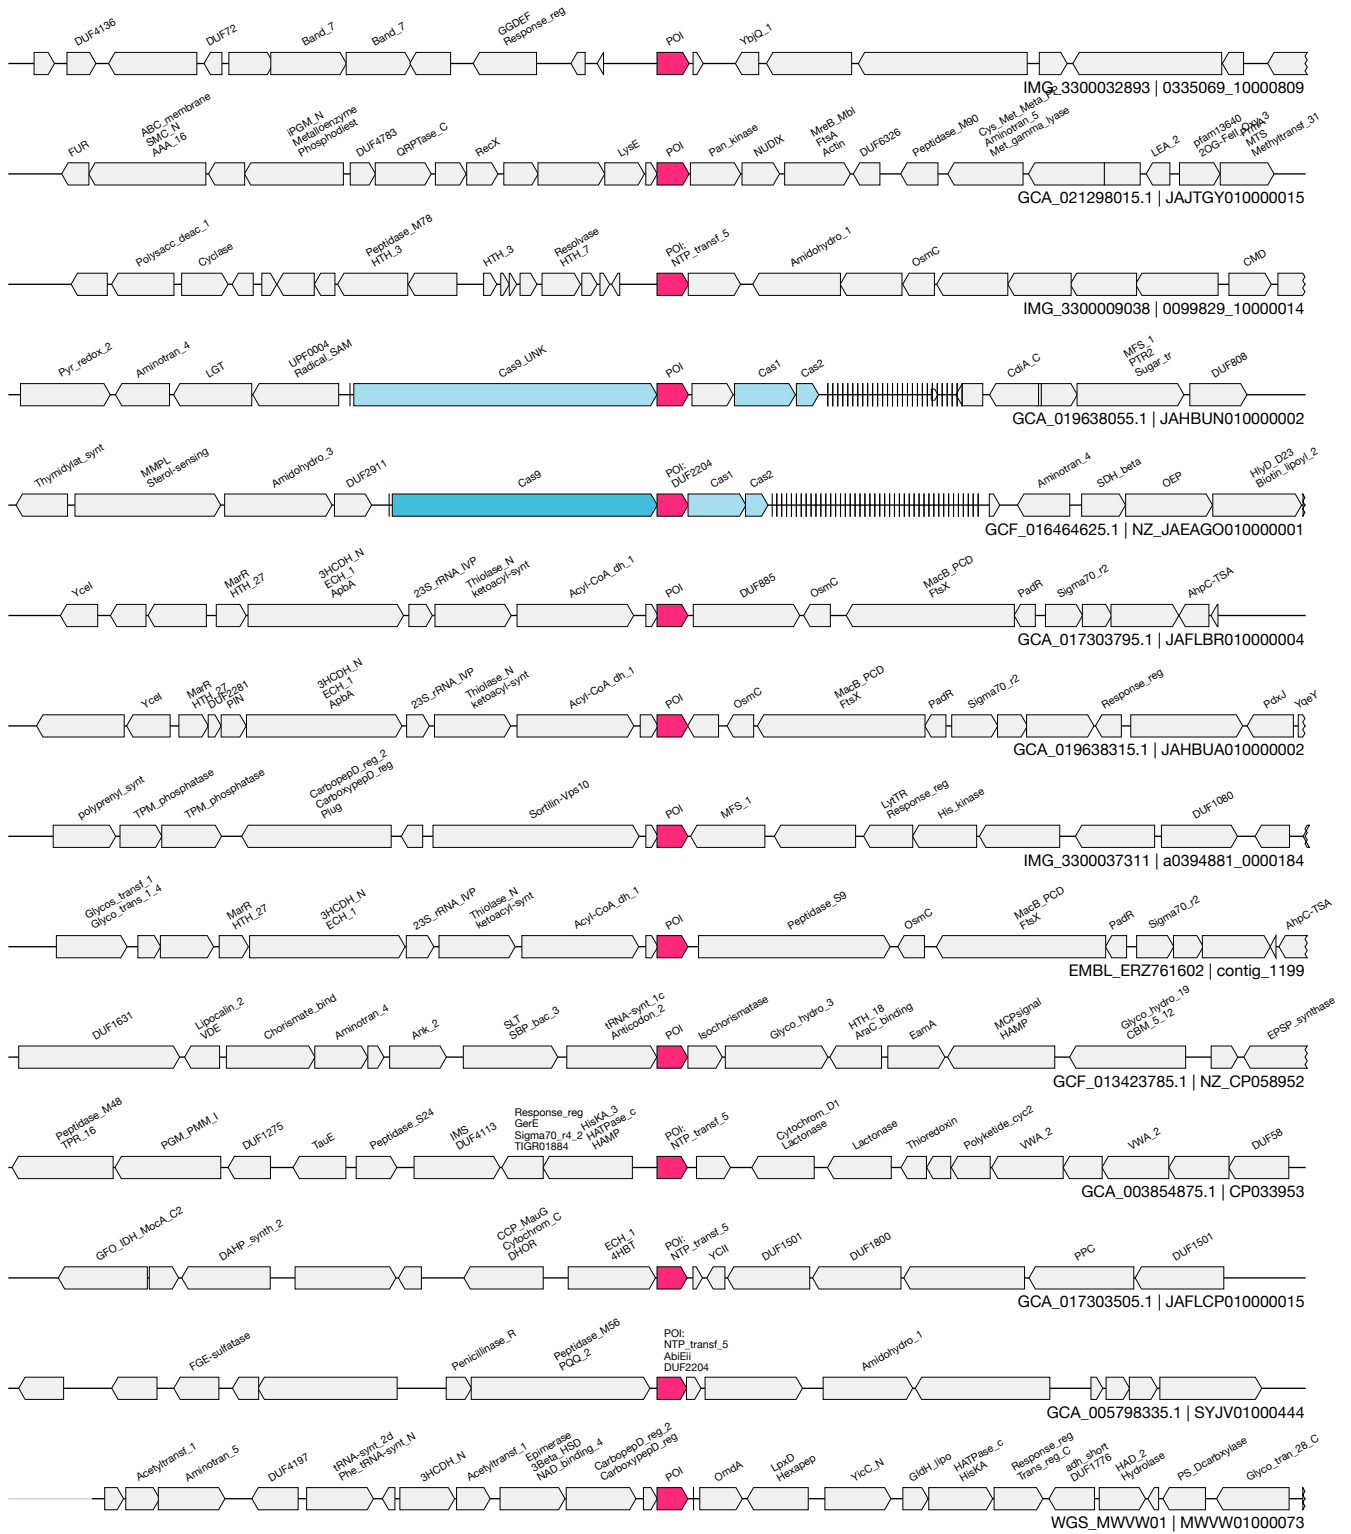

1kb

CZ

**UAS-102**  
Auxiliary

**(DUF5343 + Helicase\_HNH\_ResIII)**  
GCF\_016526145.1&&NZ\_JADDUE01000010&&220137\_220869\_-1

3 / 3.0

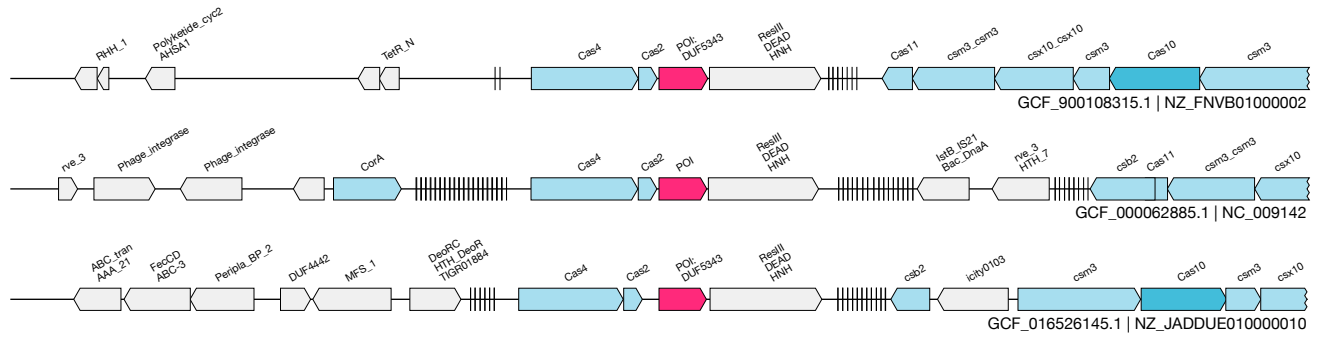

1kb

DA

**UAS-103**  
Auxiliary

**(TPR HATPase)**

2 / 3.0

GCF\_016757215.1&&NZ\_JAESIY010000005&&313654\_315544\_1

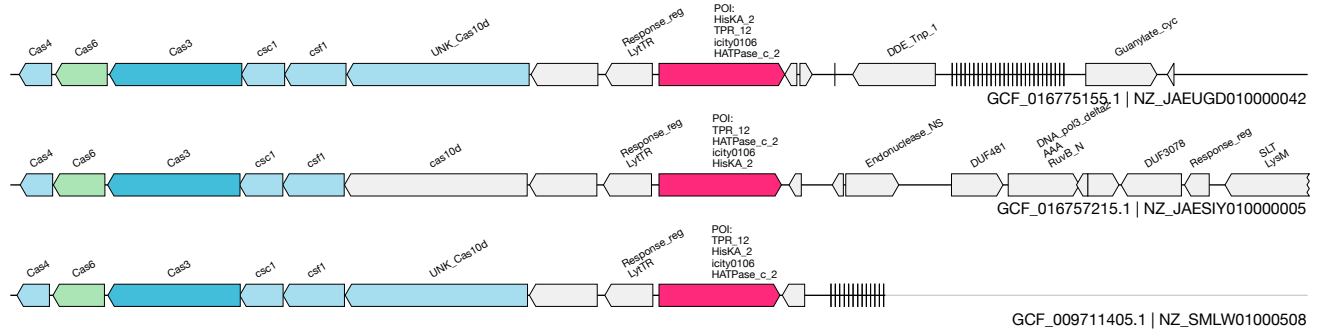

1kb

DB

**UAS-104**  
Auxiliary

**(ATPase + Metallophosphatase)**  
GCF\_018502485.1&&NZ\_CP075546&&993250\_997099\_1

3 / 3.0

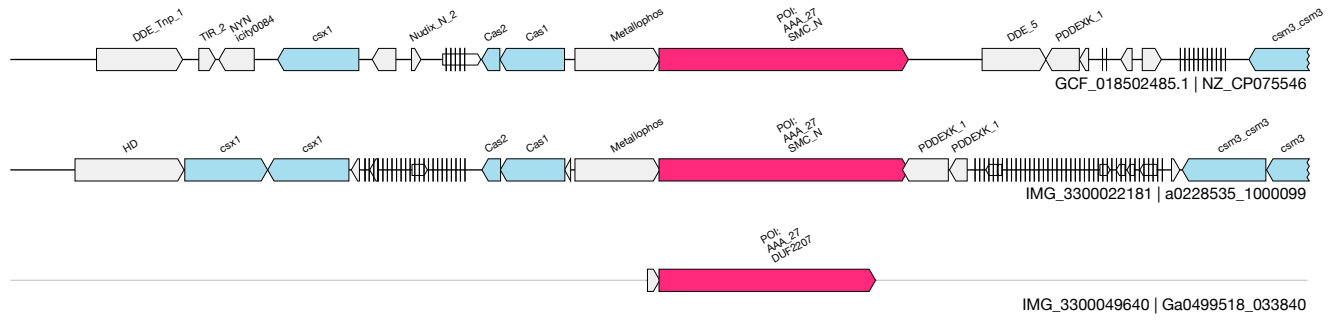

1kb



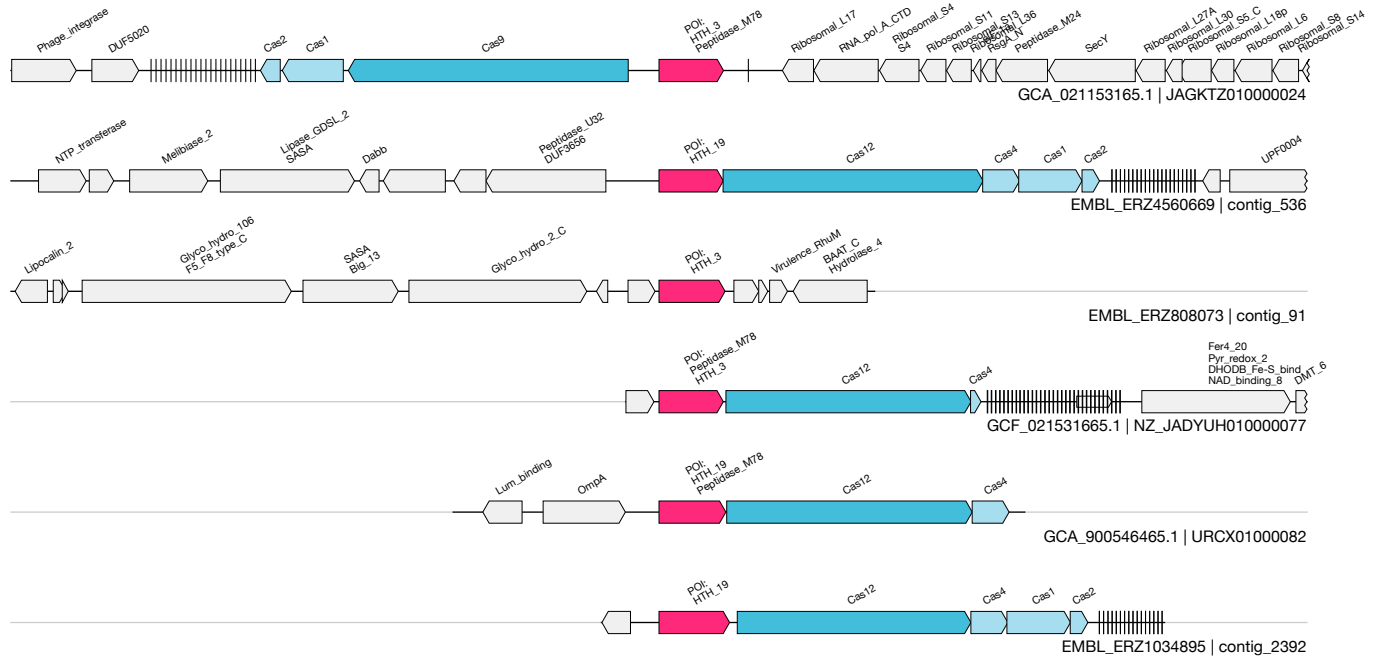

1kb

DD

**UAS-106**  
Auxiliary

**(DUF3800)**

3 / 3.0

GCF\_900453405.1&&NZ\_UGPM01000003&&1785257\_1786514\_-1

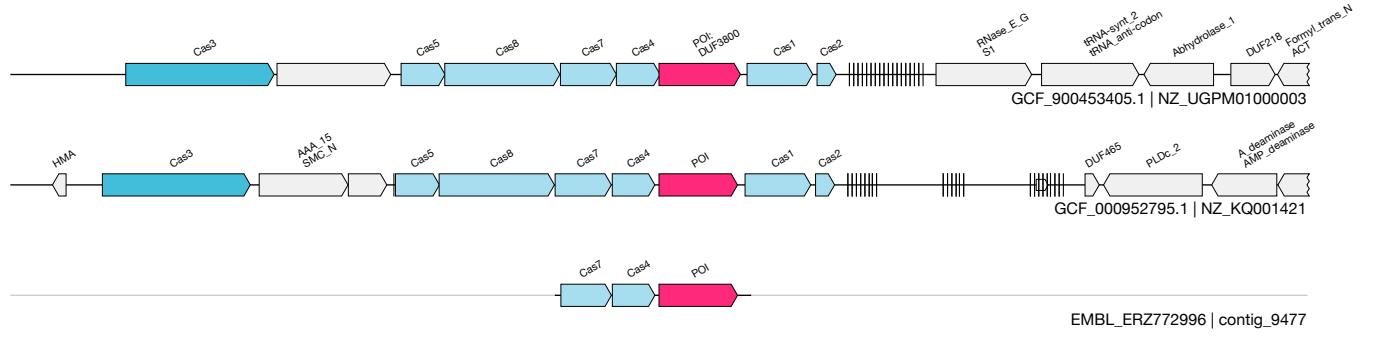

GCF\_902500215.1&&NZ\_CABVOU010000021&&55311\_56466\_-1

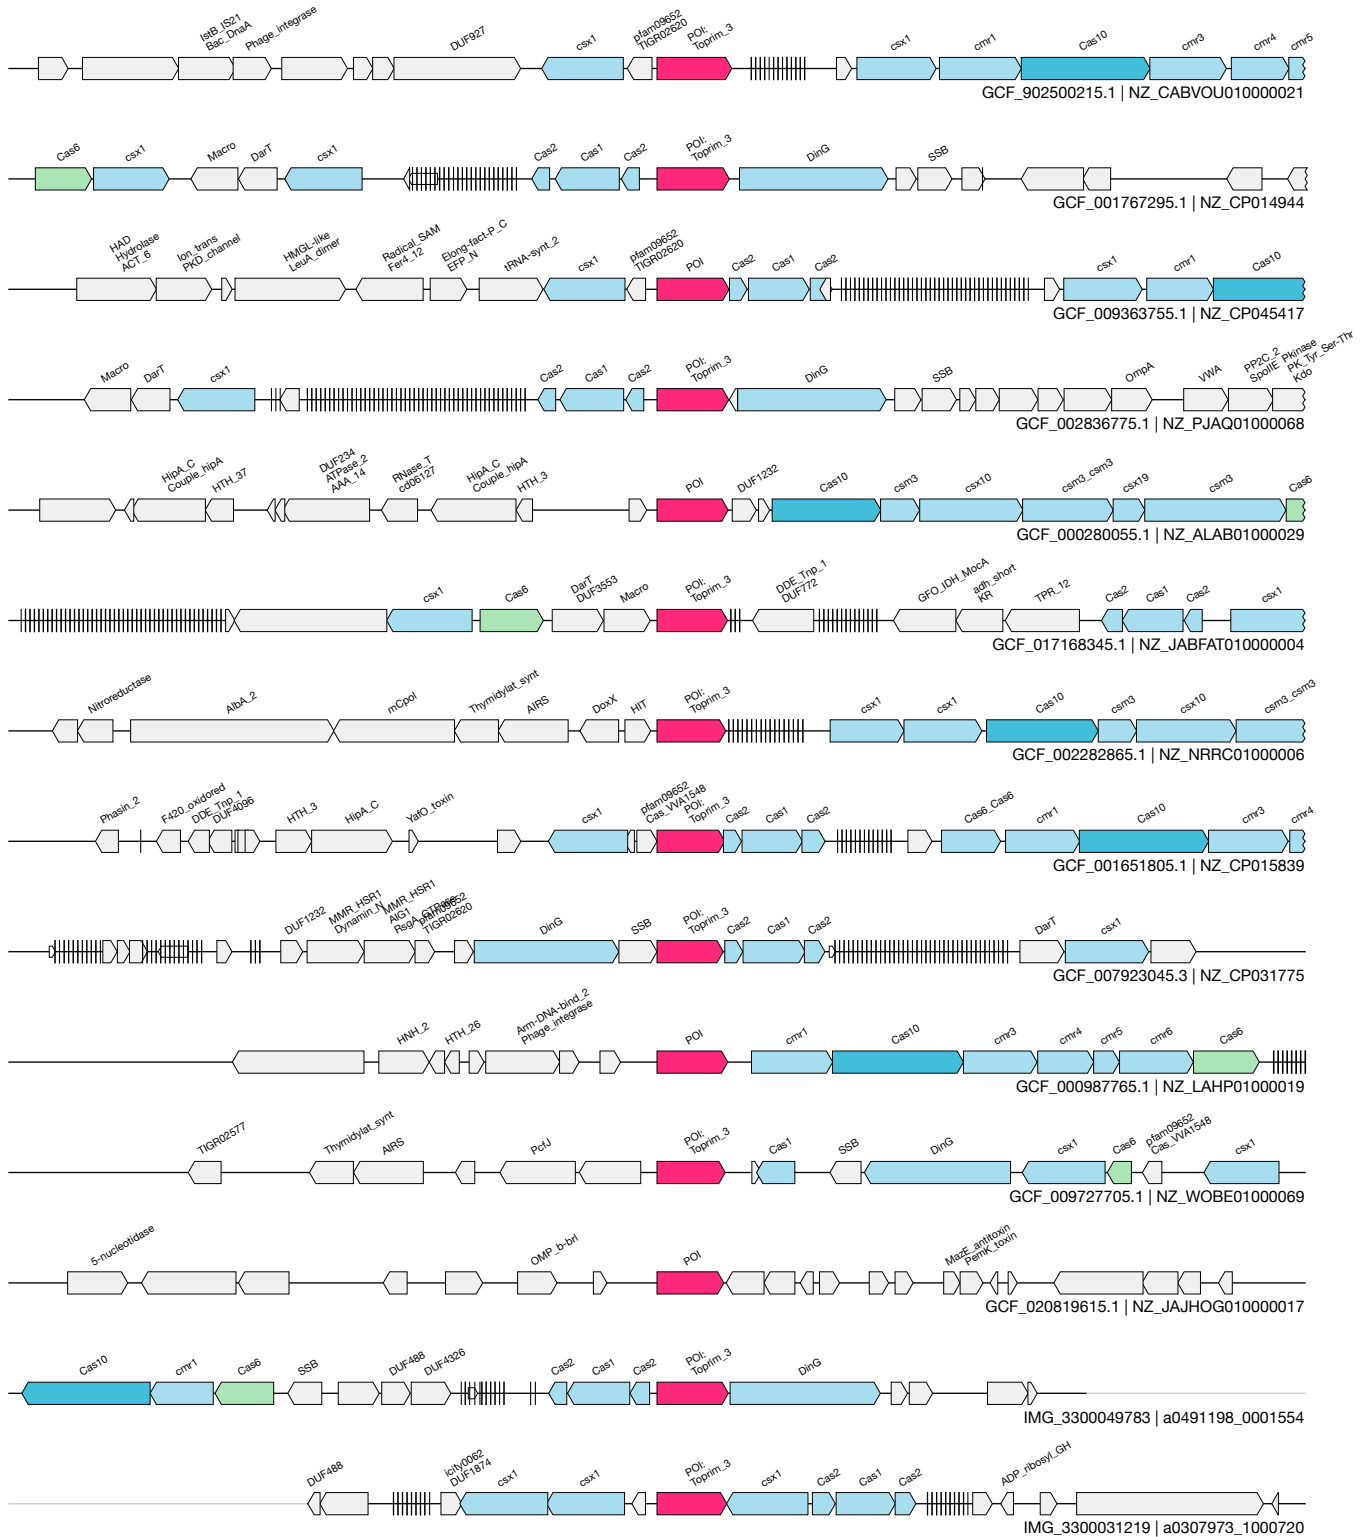

1kb

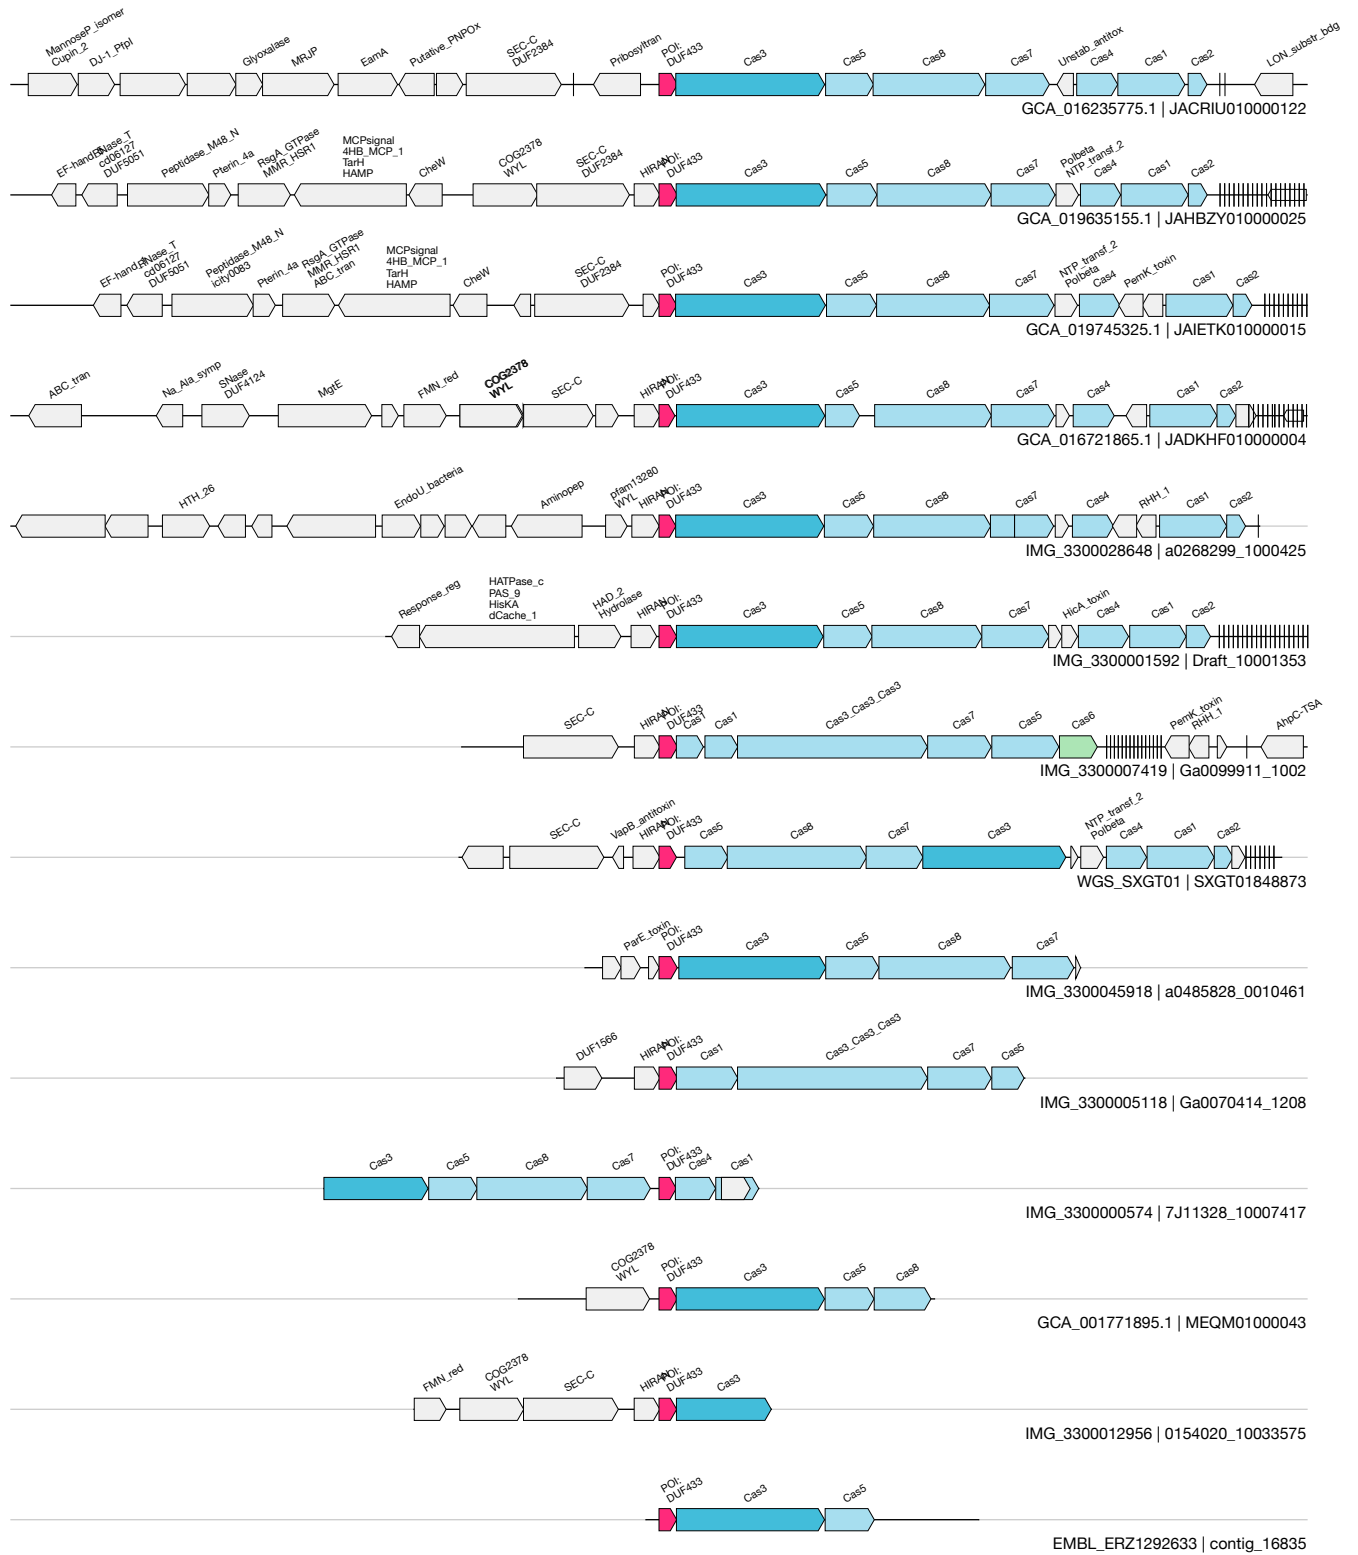

1kb

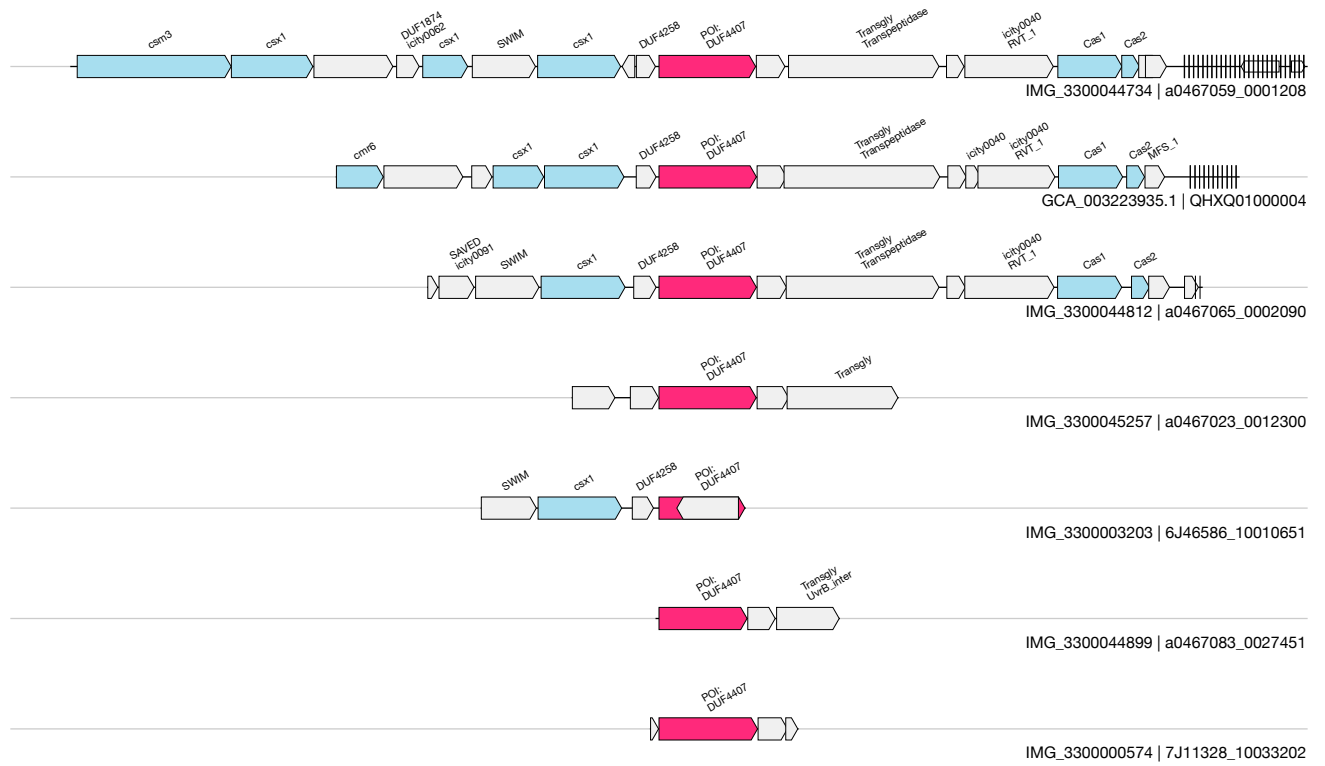

1kb

DH

UAS-110  
Auxiliary

(mega peptidase)  
IMG\_3300001598&&EMG\_10018732&&309\_3072\_1

2 / 3.5

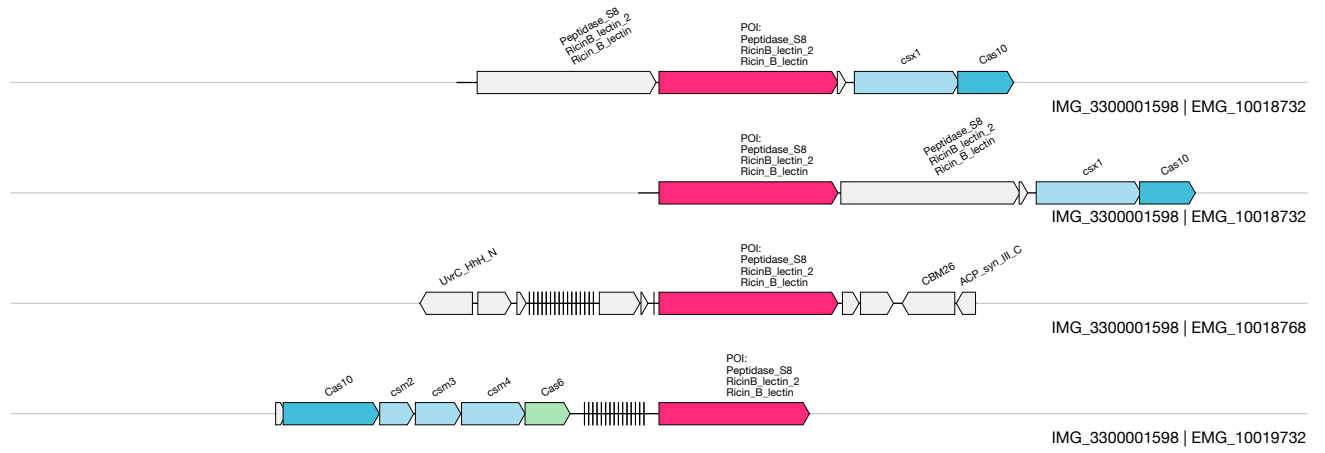

1kb

DI

**UAS-111**  
Auxiliary

**(TIR cascade)**  
IMG\_3300002223&&7J26845\_10007859&&1305\_2472\_1

2 / 4.4

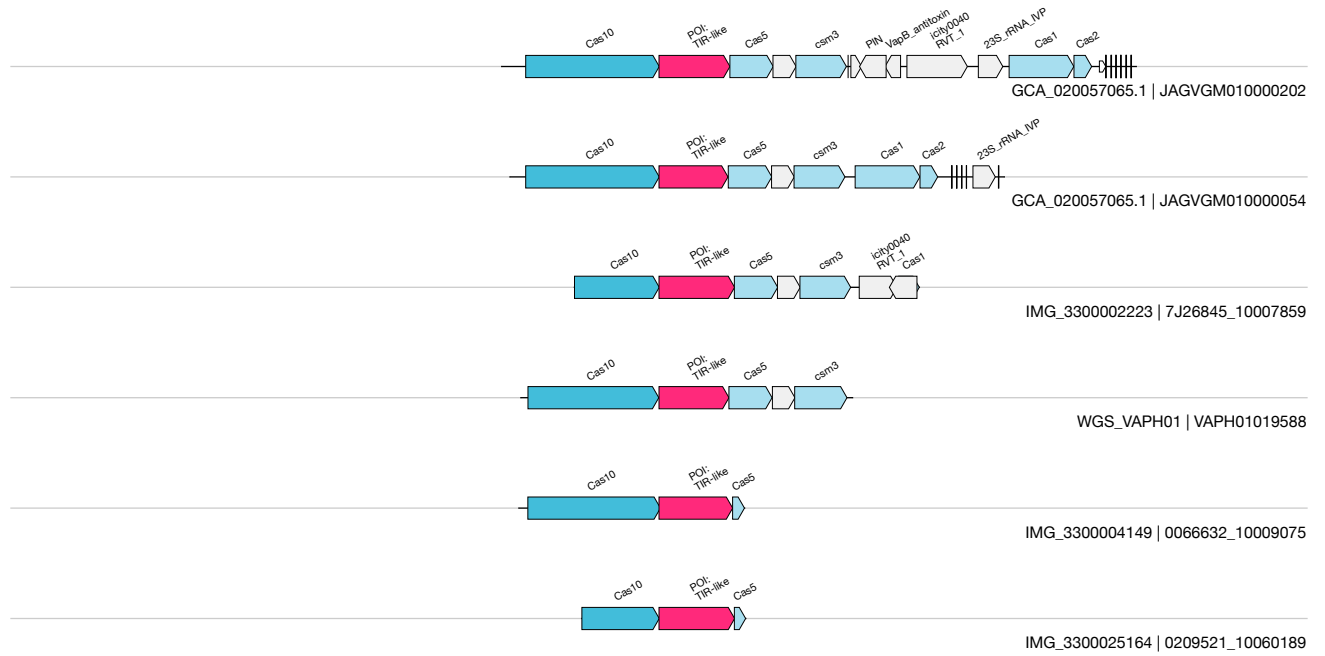

1kb

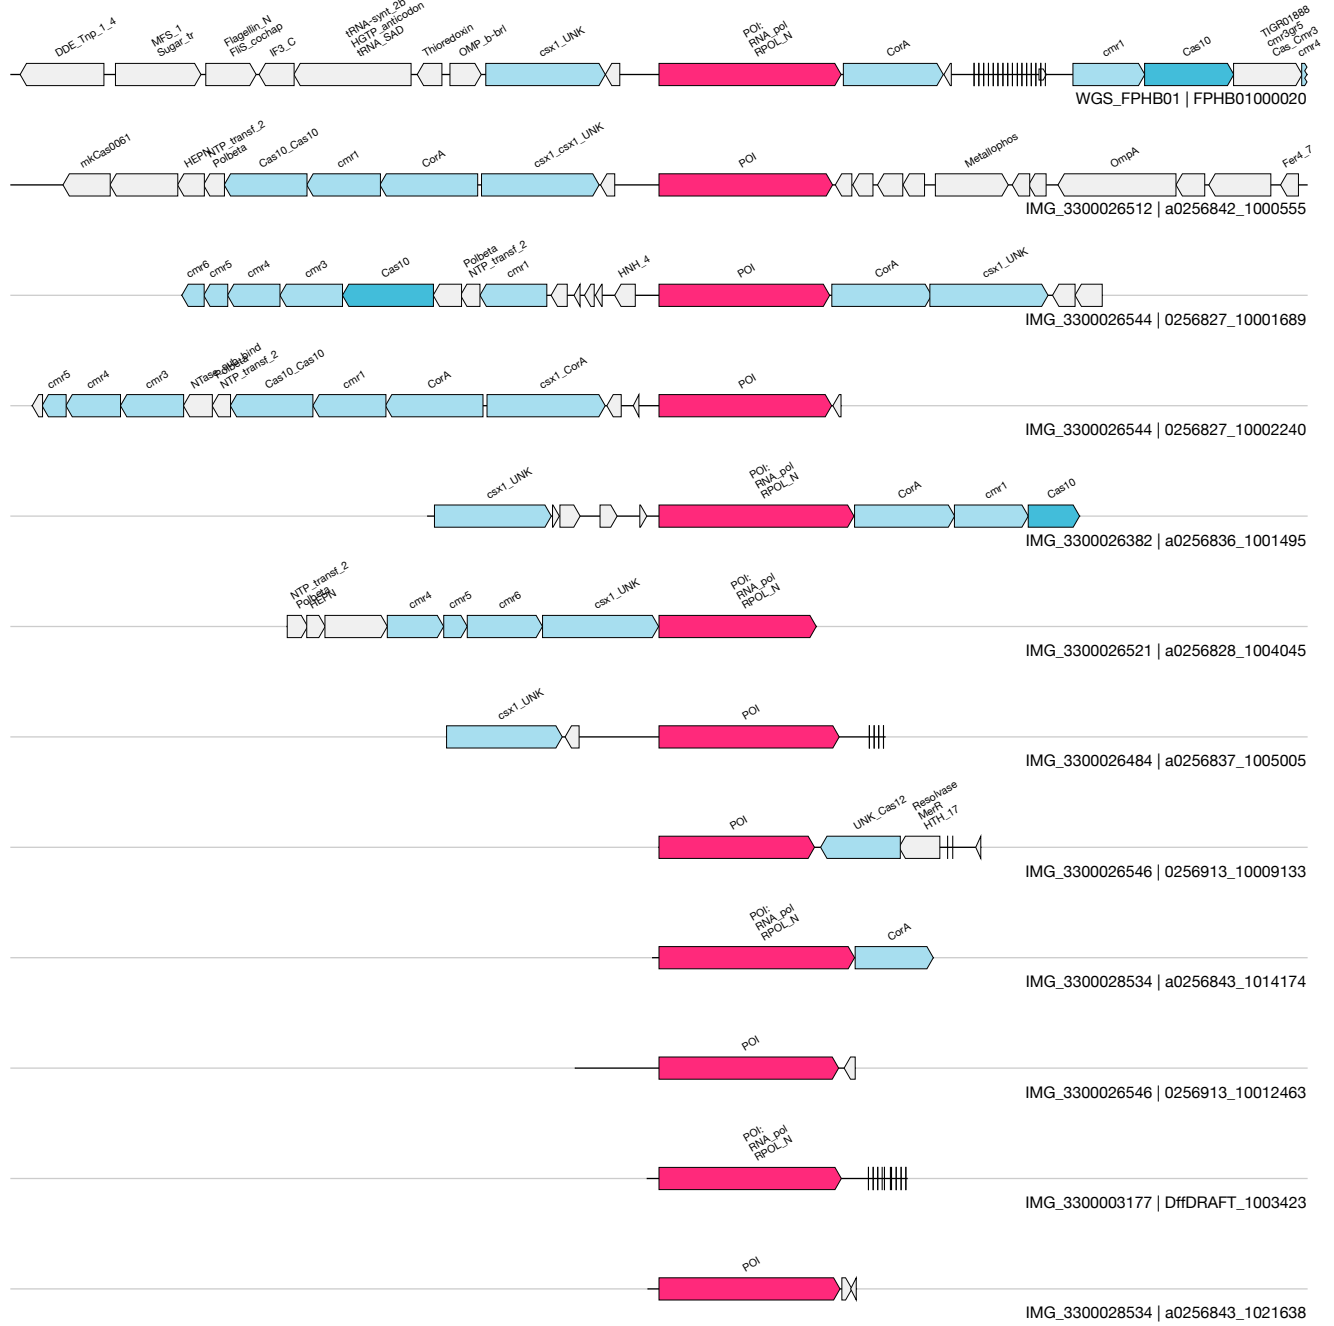

1kb



DK

UAS-112  
Auxiliary

(Csx20 operonized with Alpha Amylase)  
IMG\_3300004628&&a0070399\_1037568&&498\_2109\_1

N/A

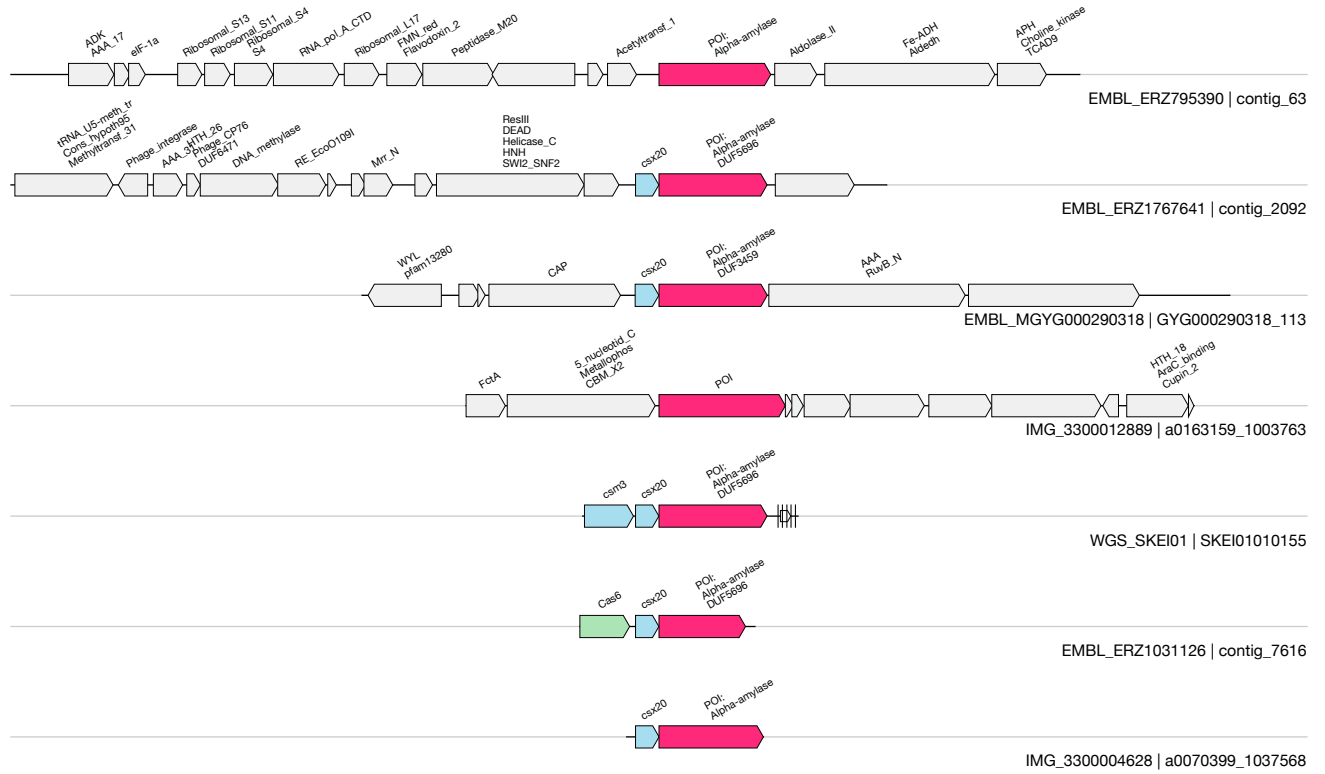

1kb

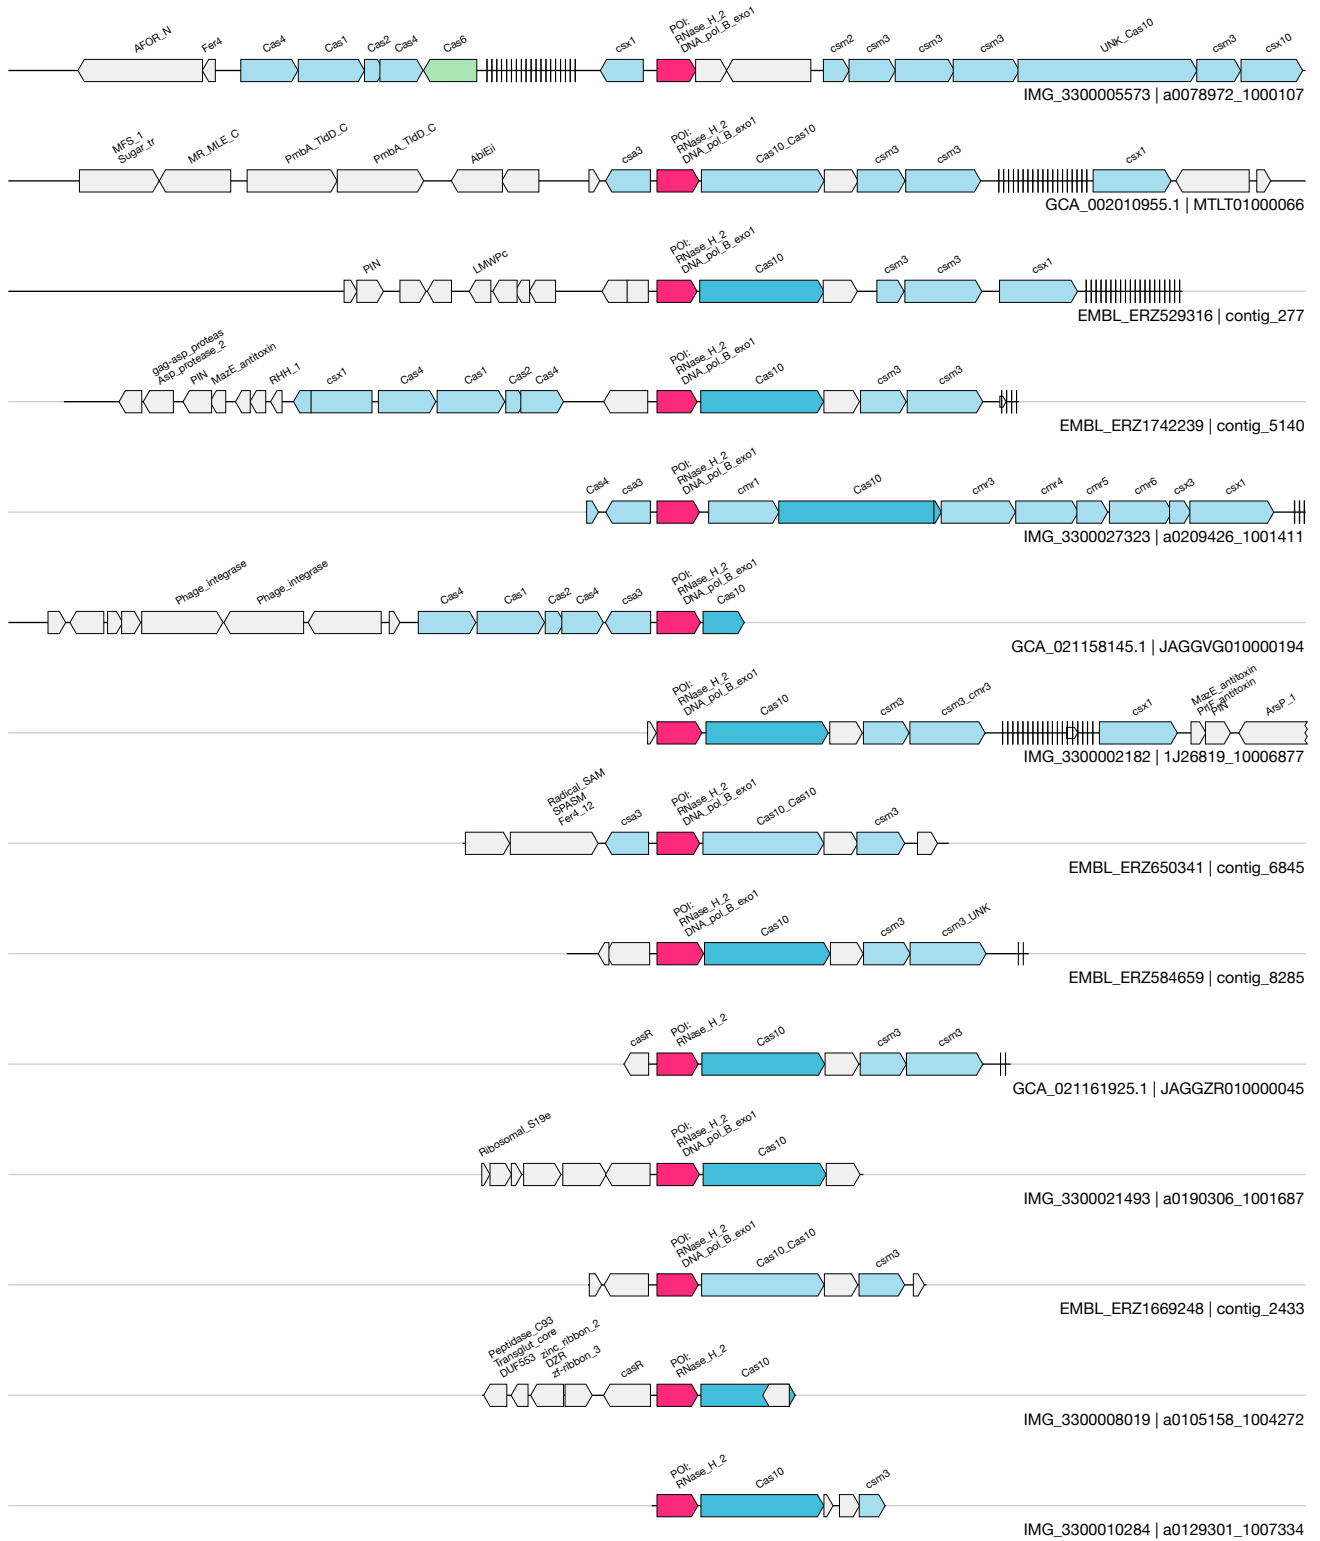

1kb

# DM

**UAS-114**  
Auxiliary

**(Tfb2\_Cas3terminus\_WYL)**  
IMG\_3300007521&&0105044\_10068709&&481\_2728\_1

5 / 5.5

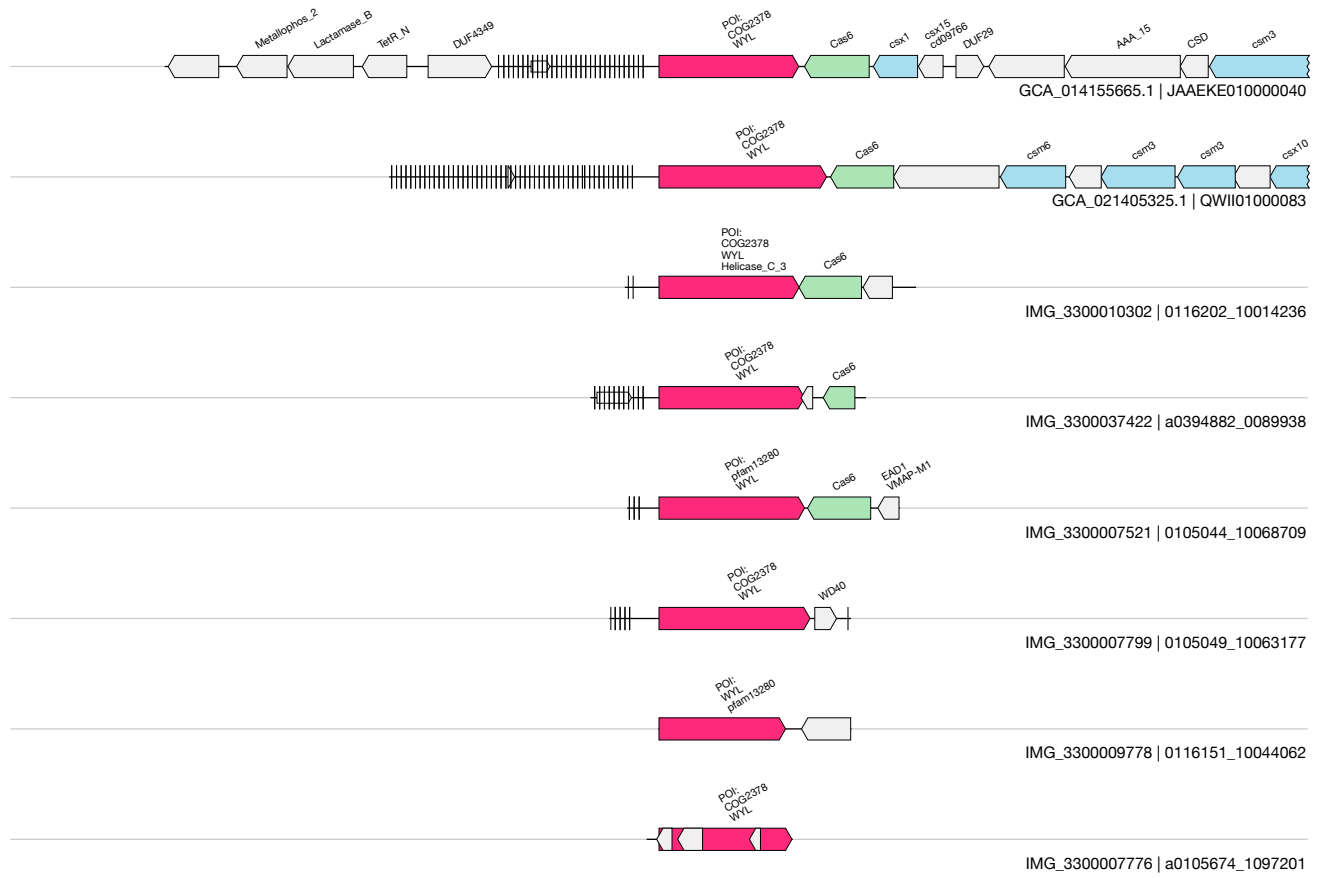

1kb

DN

UAS-115  
Auxiliary

(SLATT)

N/A

IMG\_3300007964&&a0100400\_1019481&&1335\_1944\_-1

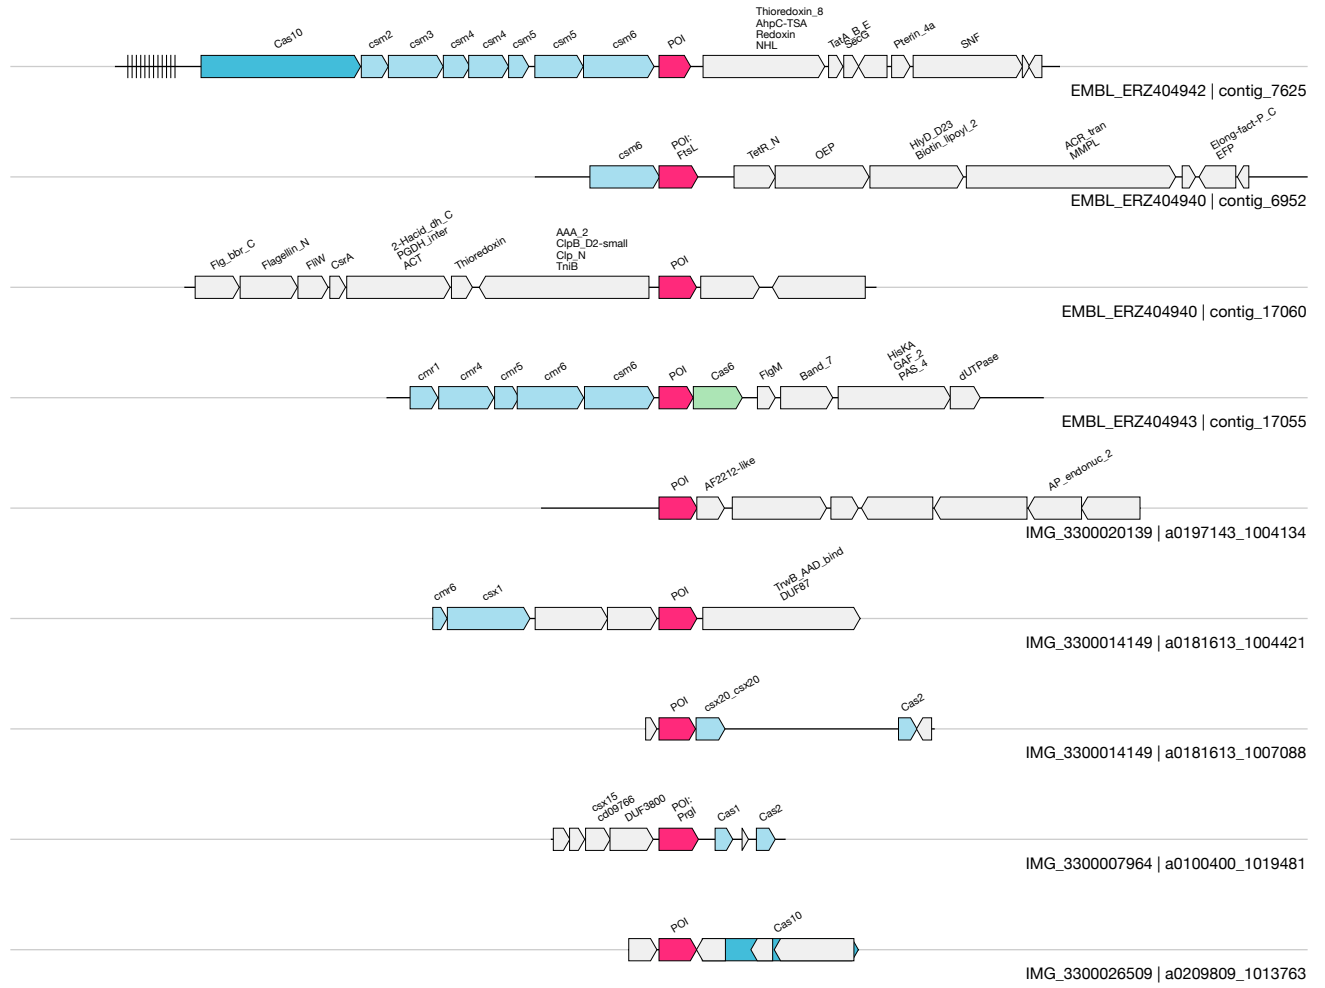

1kb

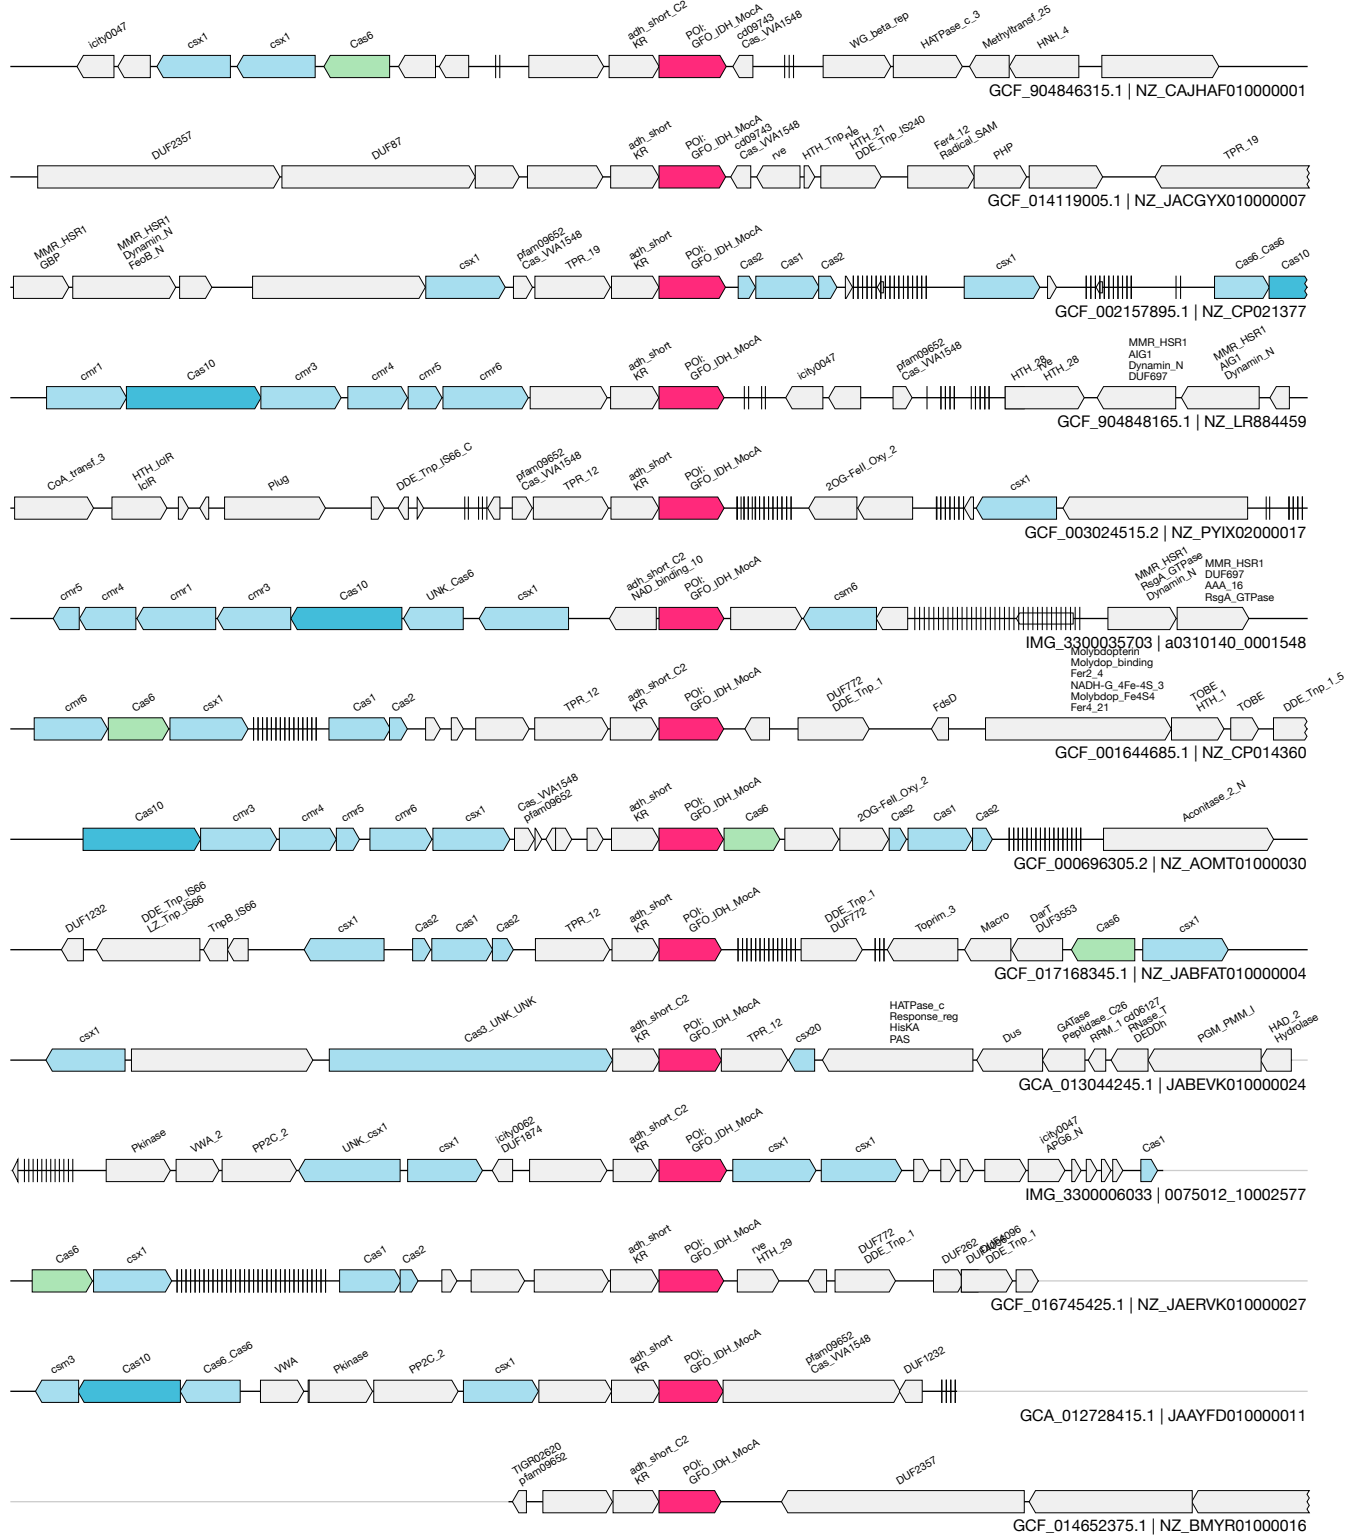

1kb

# DP

**UAS-117**  
Auxiliary

**(DUF4231)**

3 / 4.8

IMG\_3300009032&&0105048\_10143319&&1427\_2051\_-1

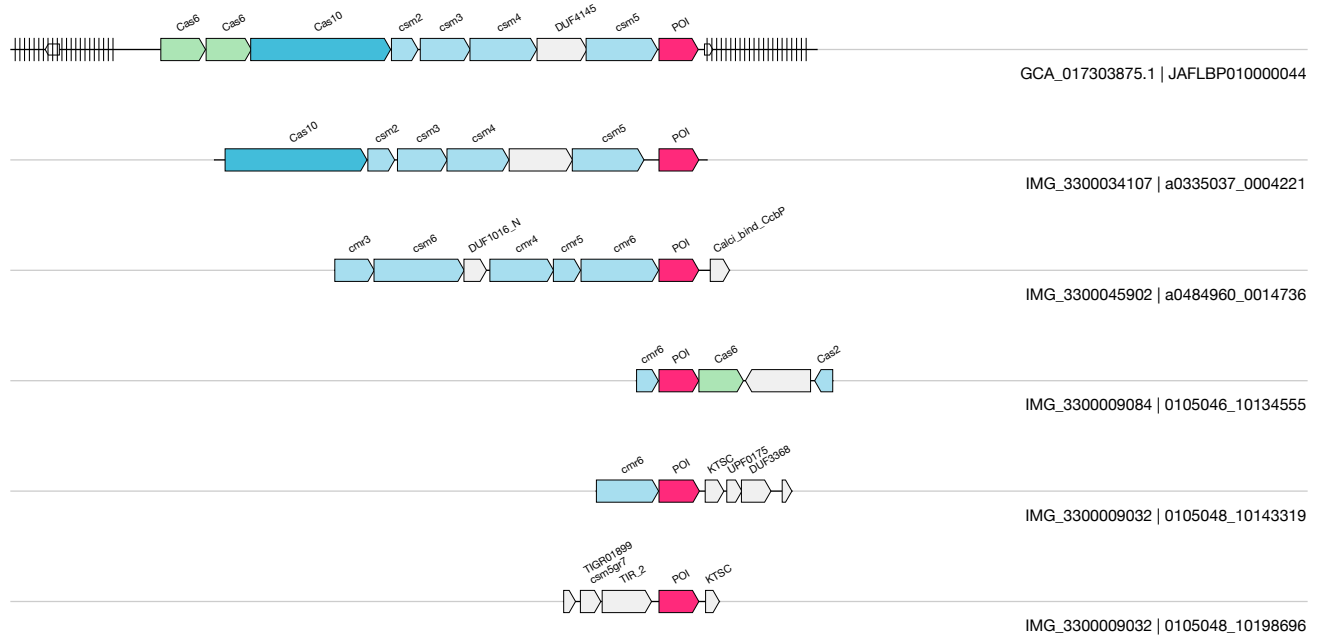

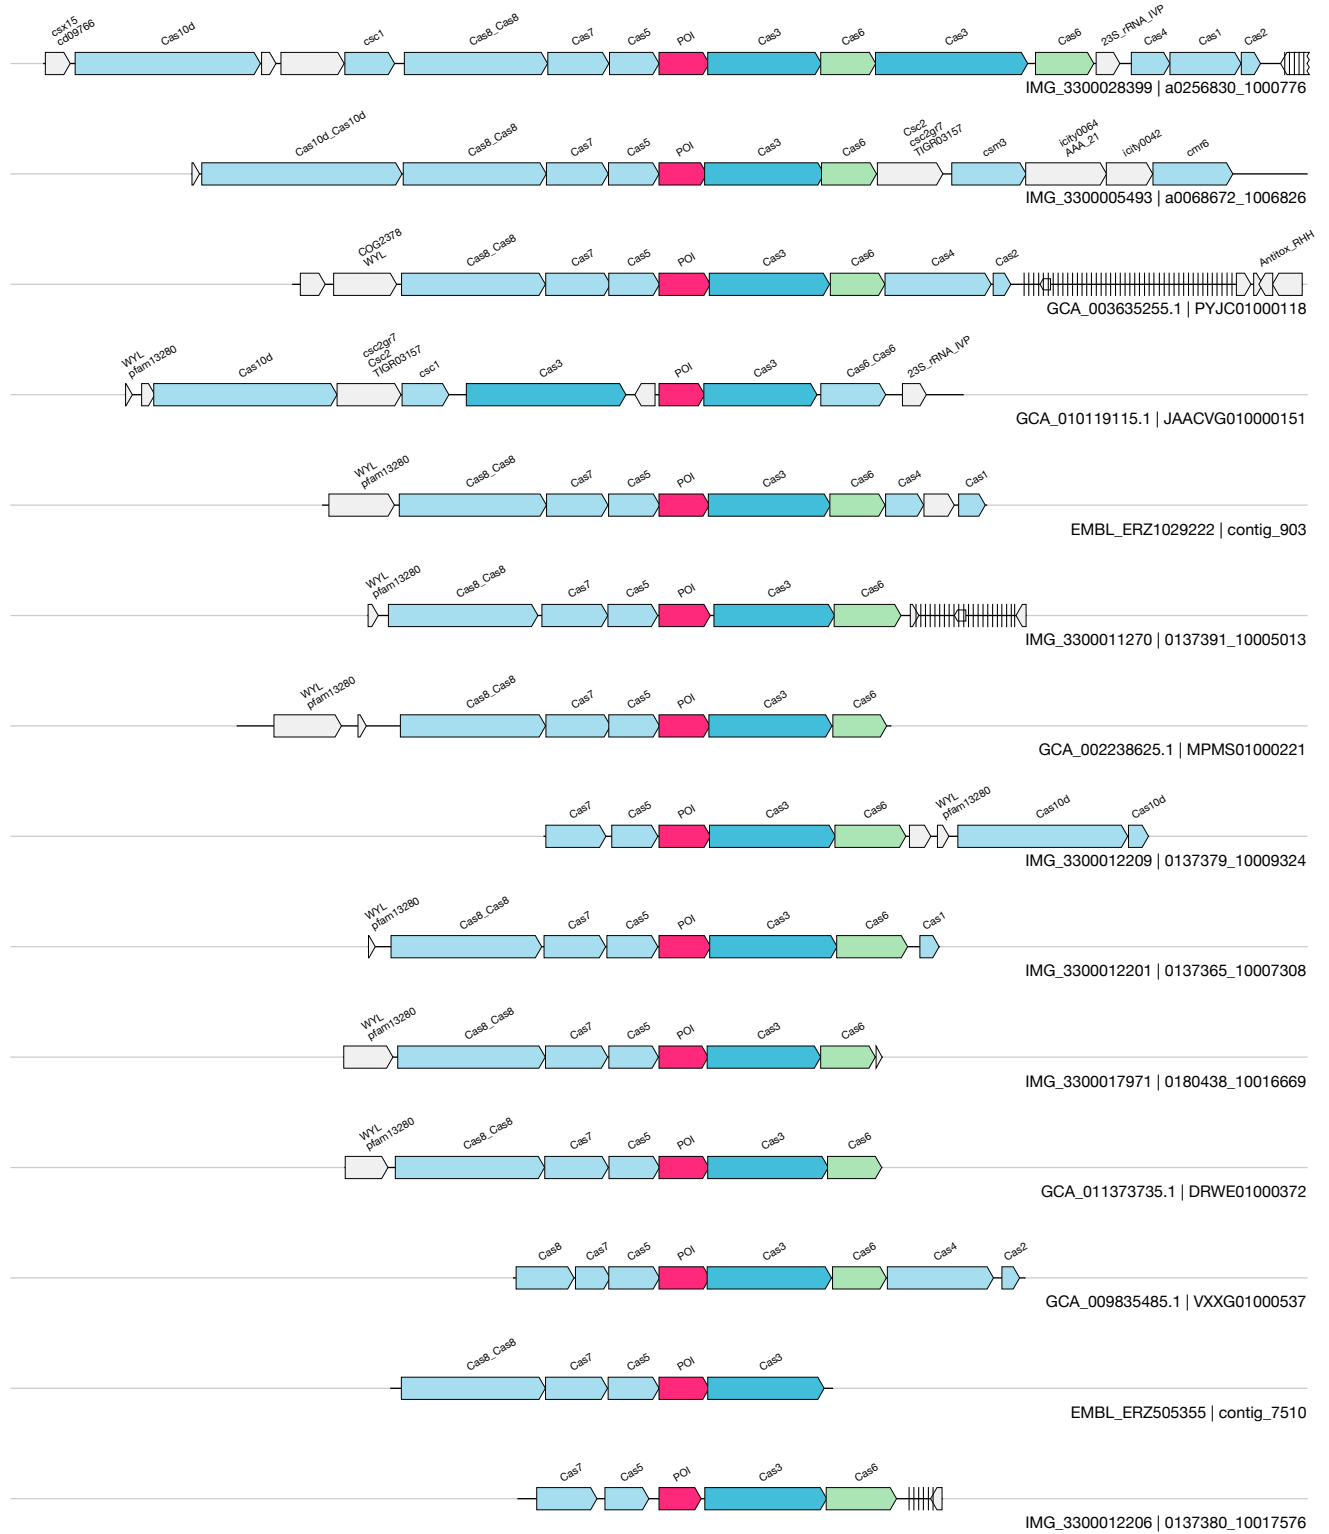

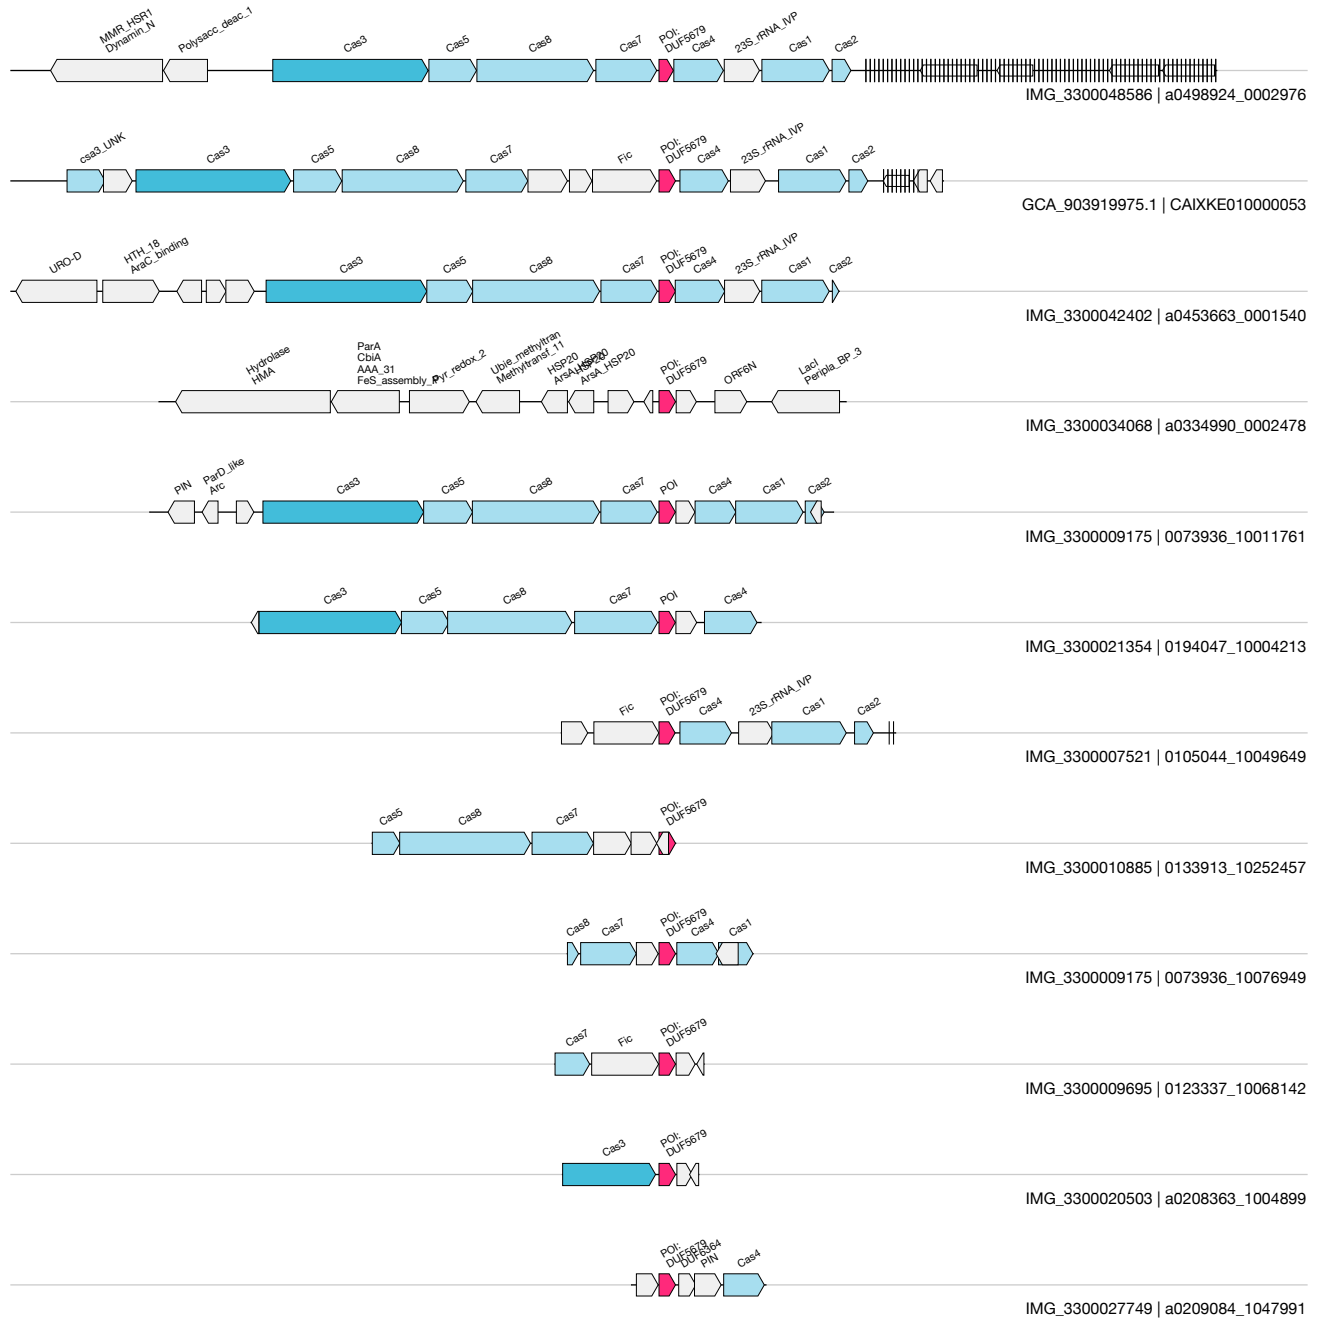

1kb



DS

UAS-120  
Auxiliary

(DUF2225)

2 / 4.1

IMG\_3300009503&&0123519\_10124867&&69\_1659\_-1

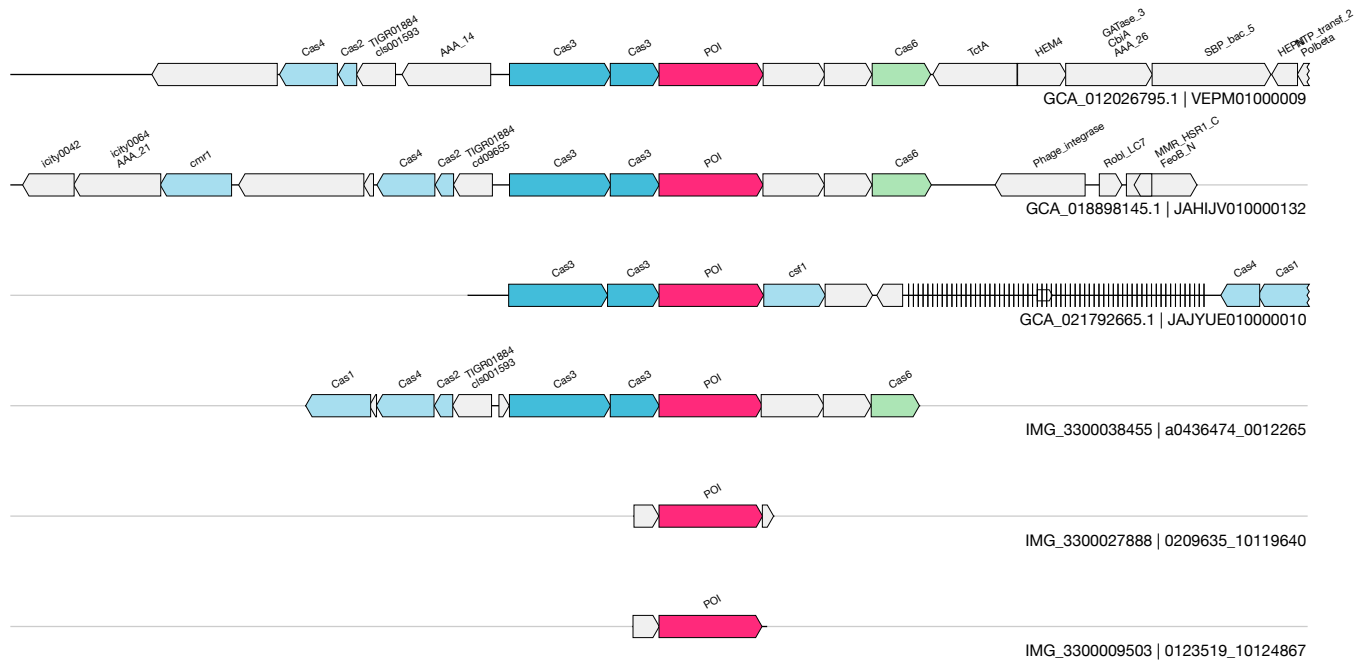

1kb

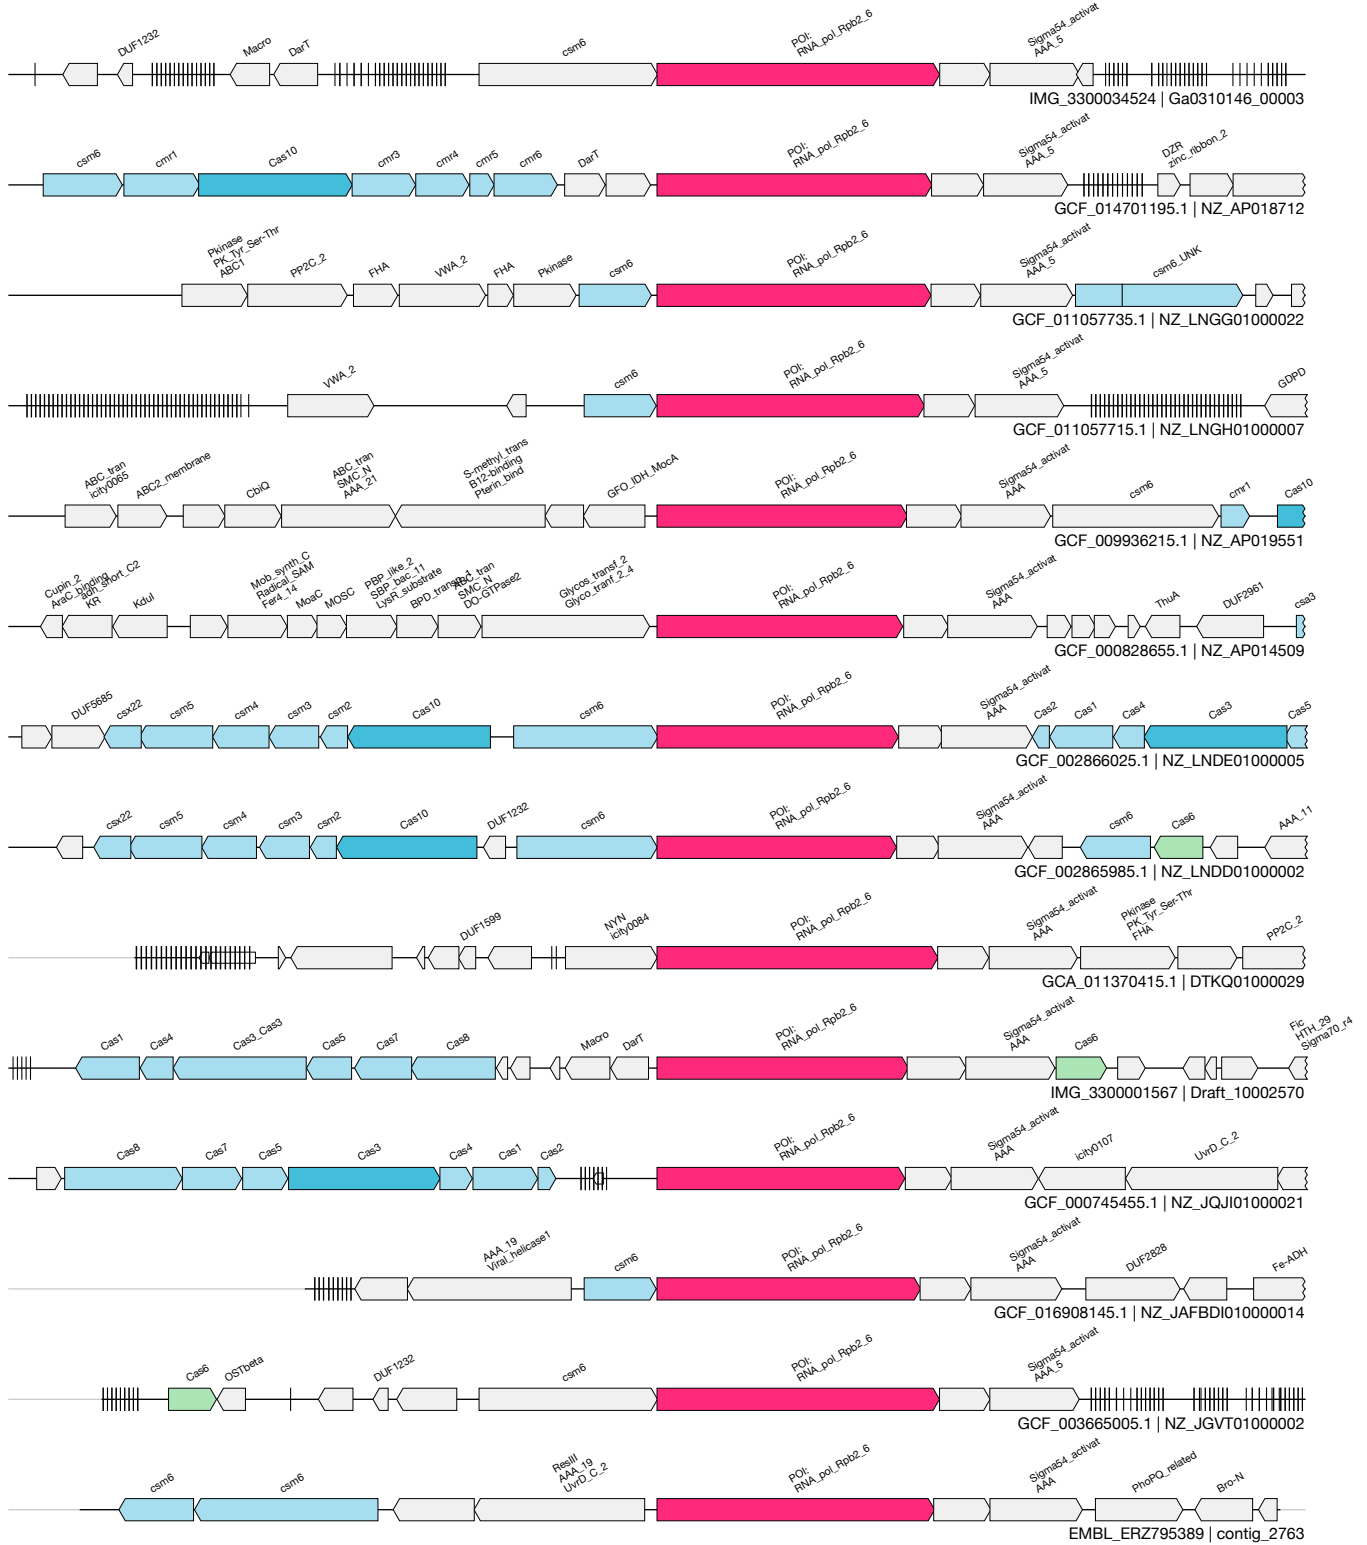

1kb

DU

UAS-122  
Auxiliary

(PRIA3 + zf)

IMG\_3300012931&&0153915\_10003429&&308\_1193\_1

15 / 36.2

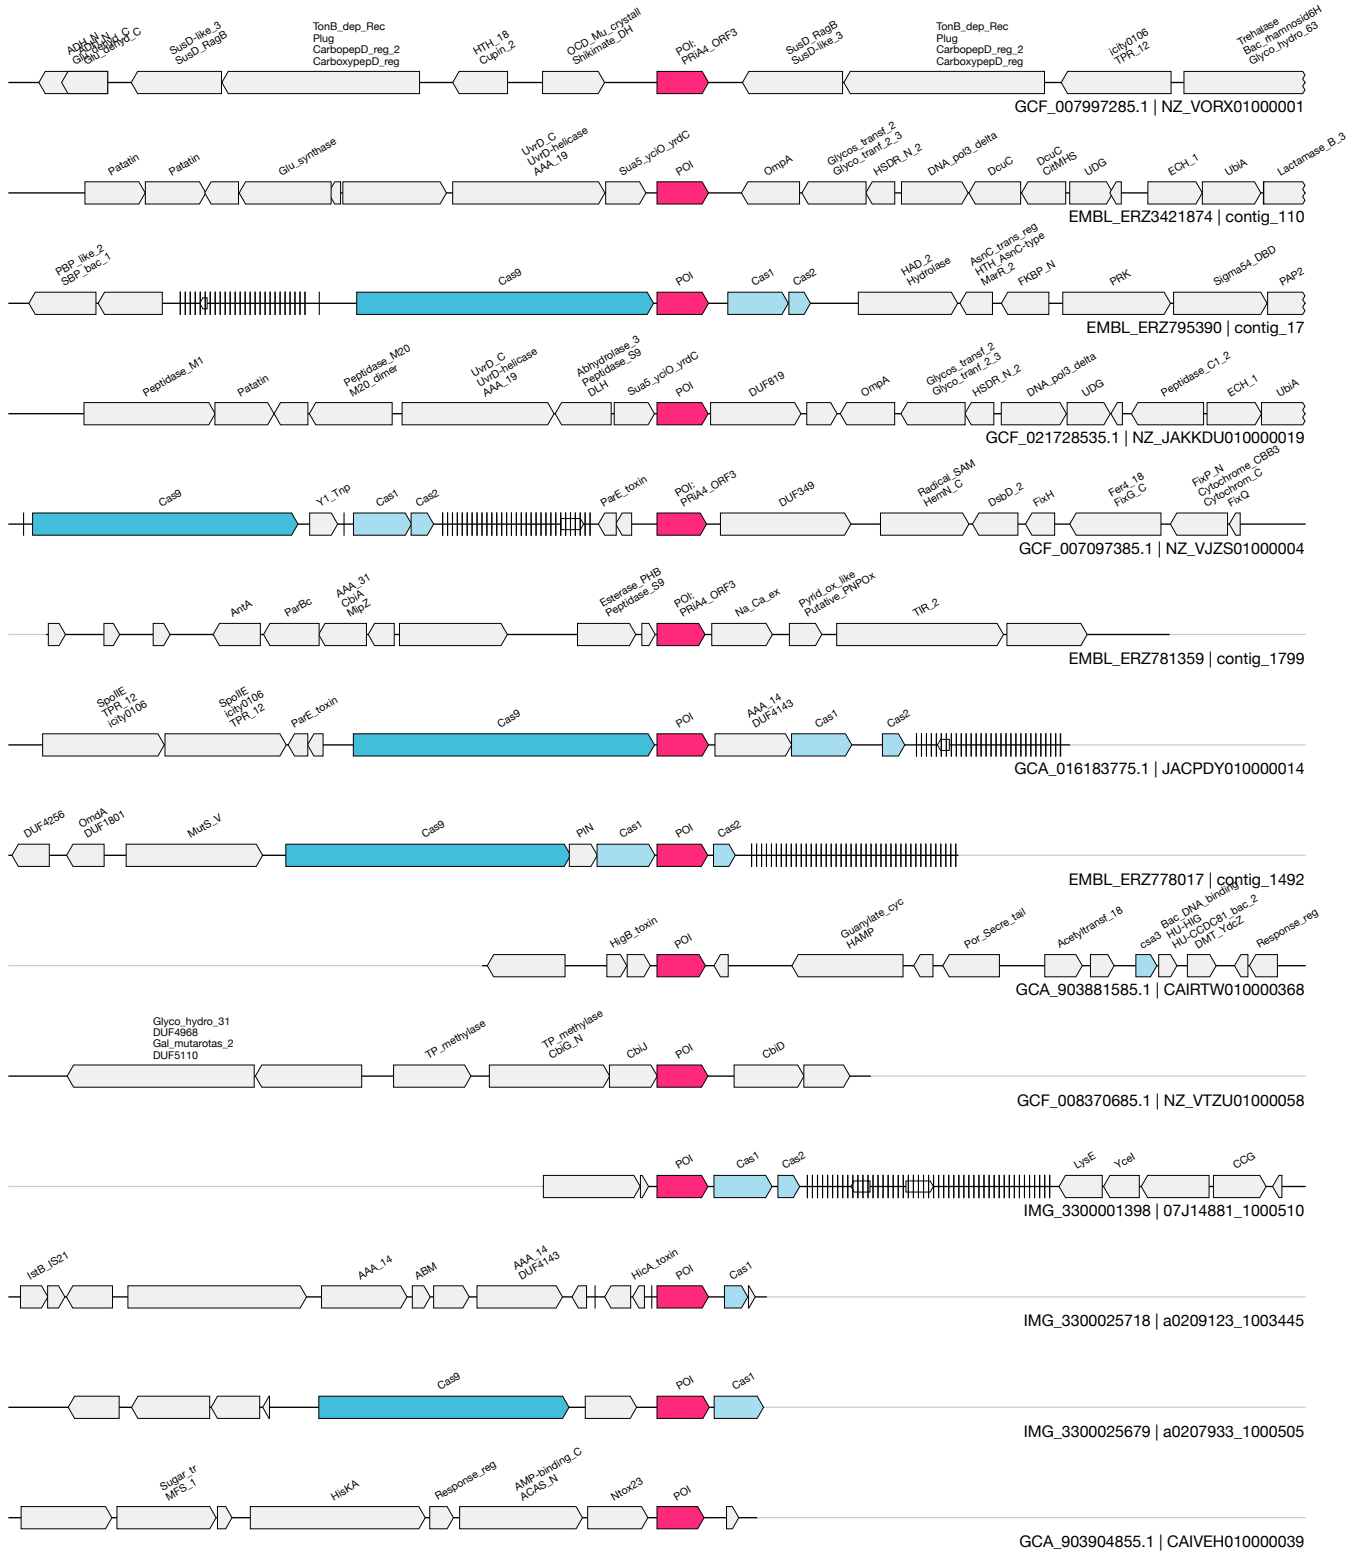

1kb

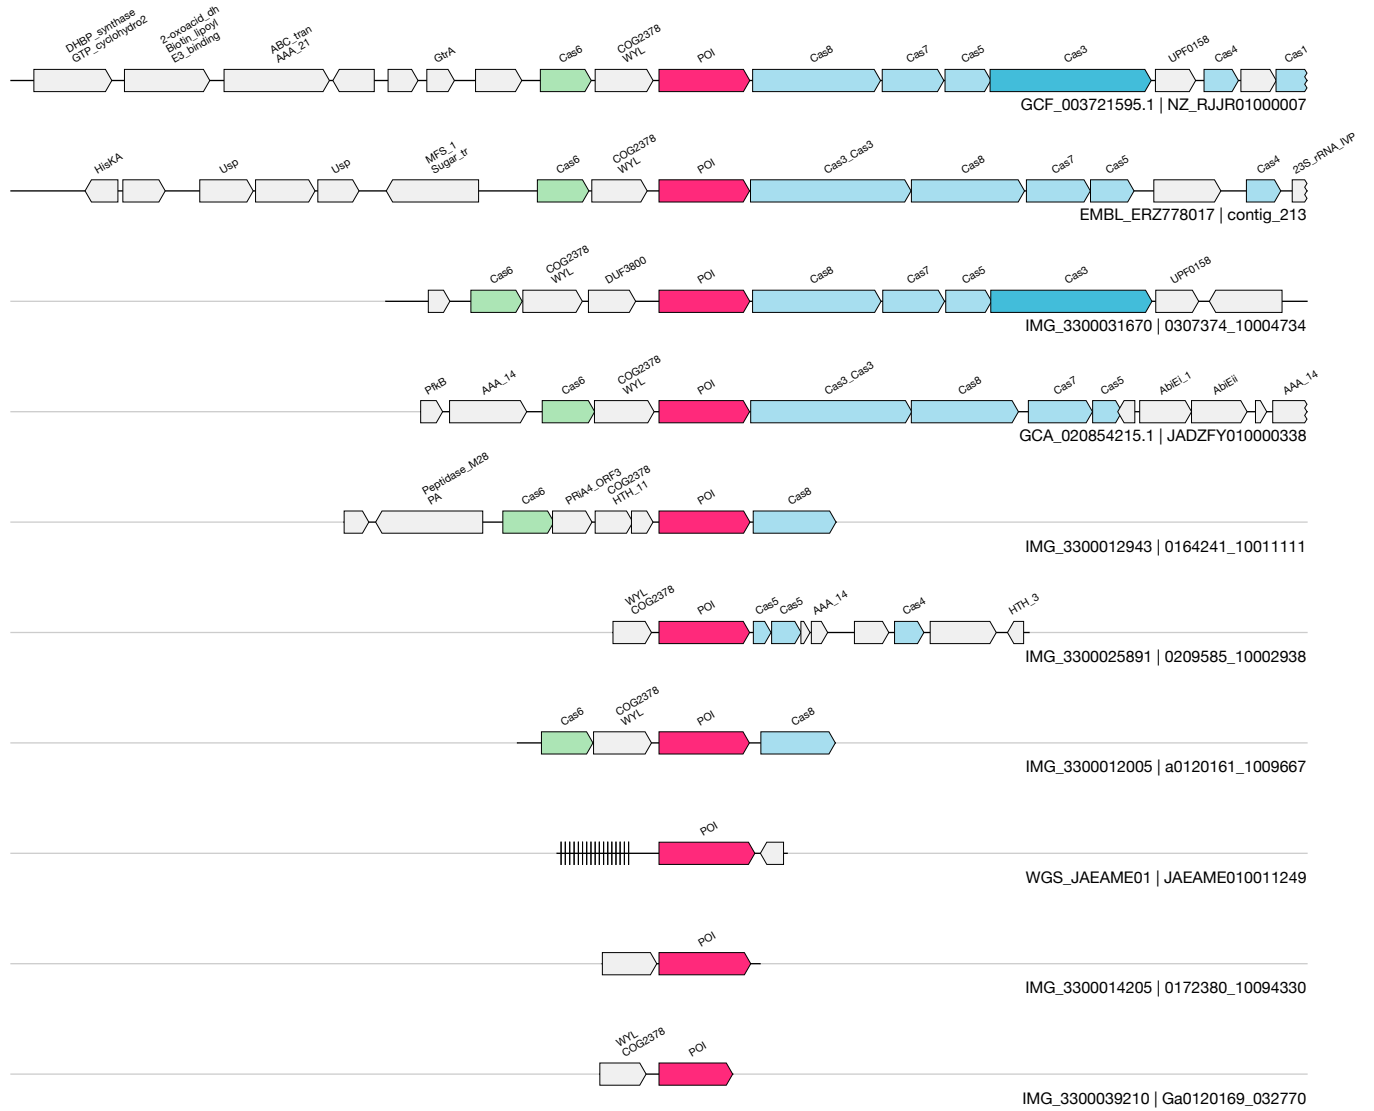

1kb

DW

**UAS-21**  
Auxiliary

**(Cas13b + CorA)**  
IMG\_3300012983&&0123349\_10003896&&1100\_3251\_1

3 / 3.7

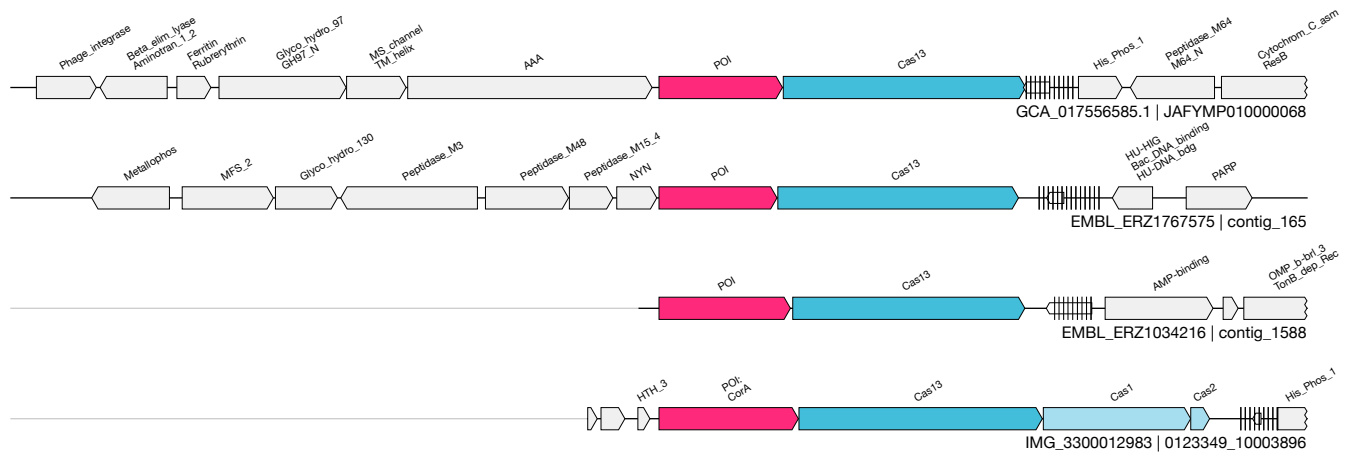

1kb

DX

UAS-123  
Auxiliary

(NACHT)

2 / 3.2

IMG\_3300014149&&a0181613\_1011337&&962\_3059\_-1

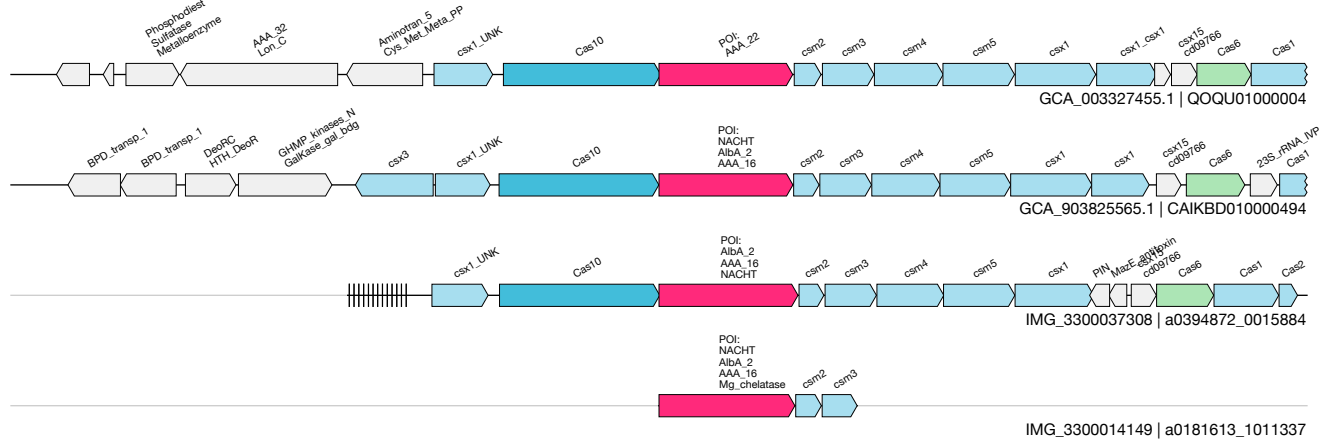

1kb

DY

**UAS-124**  
Auxiliary

**(unknown)**

3 / 3.3

IMG\_3300014153&&a0181527\_1048931&&1181\_2084\_-1

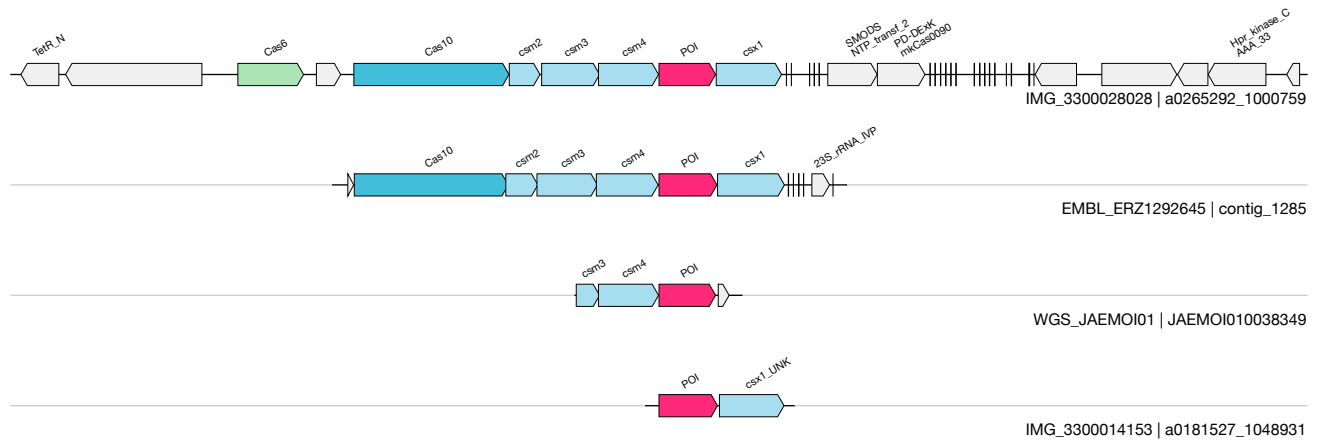

1kb

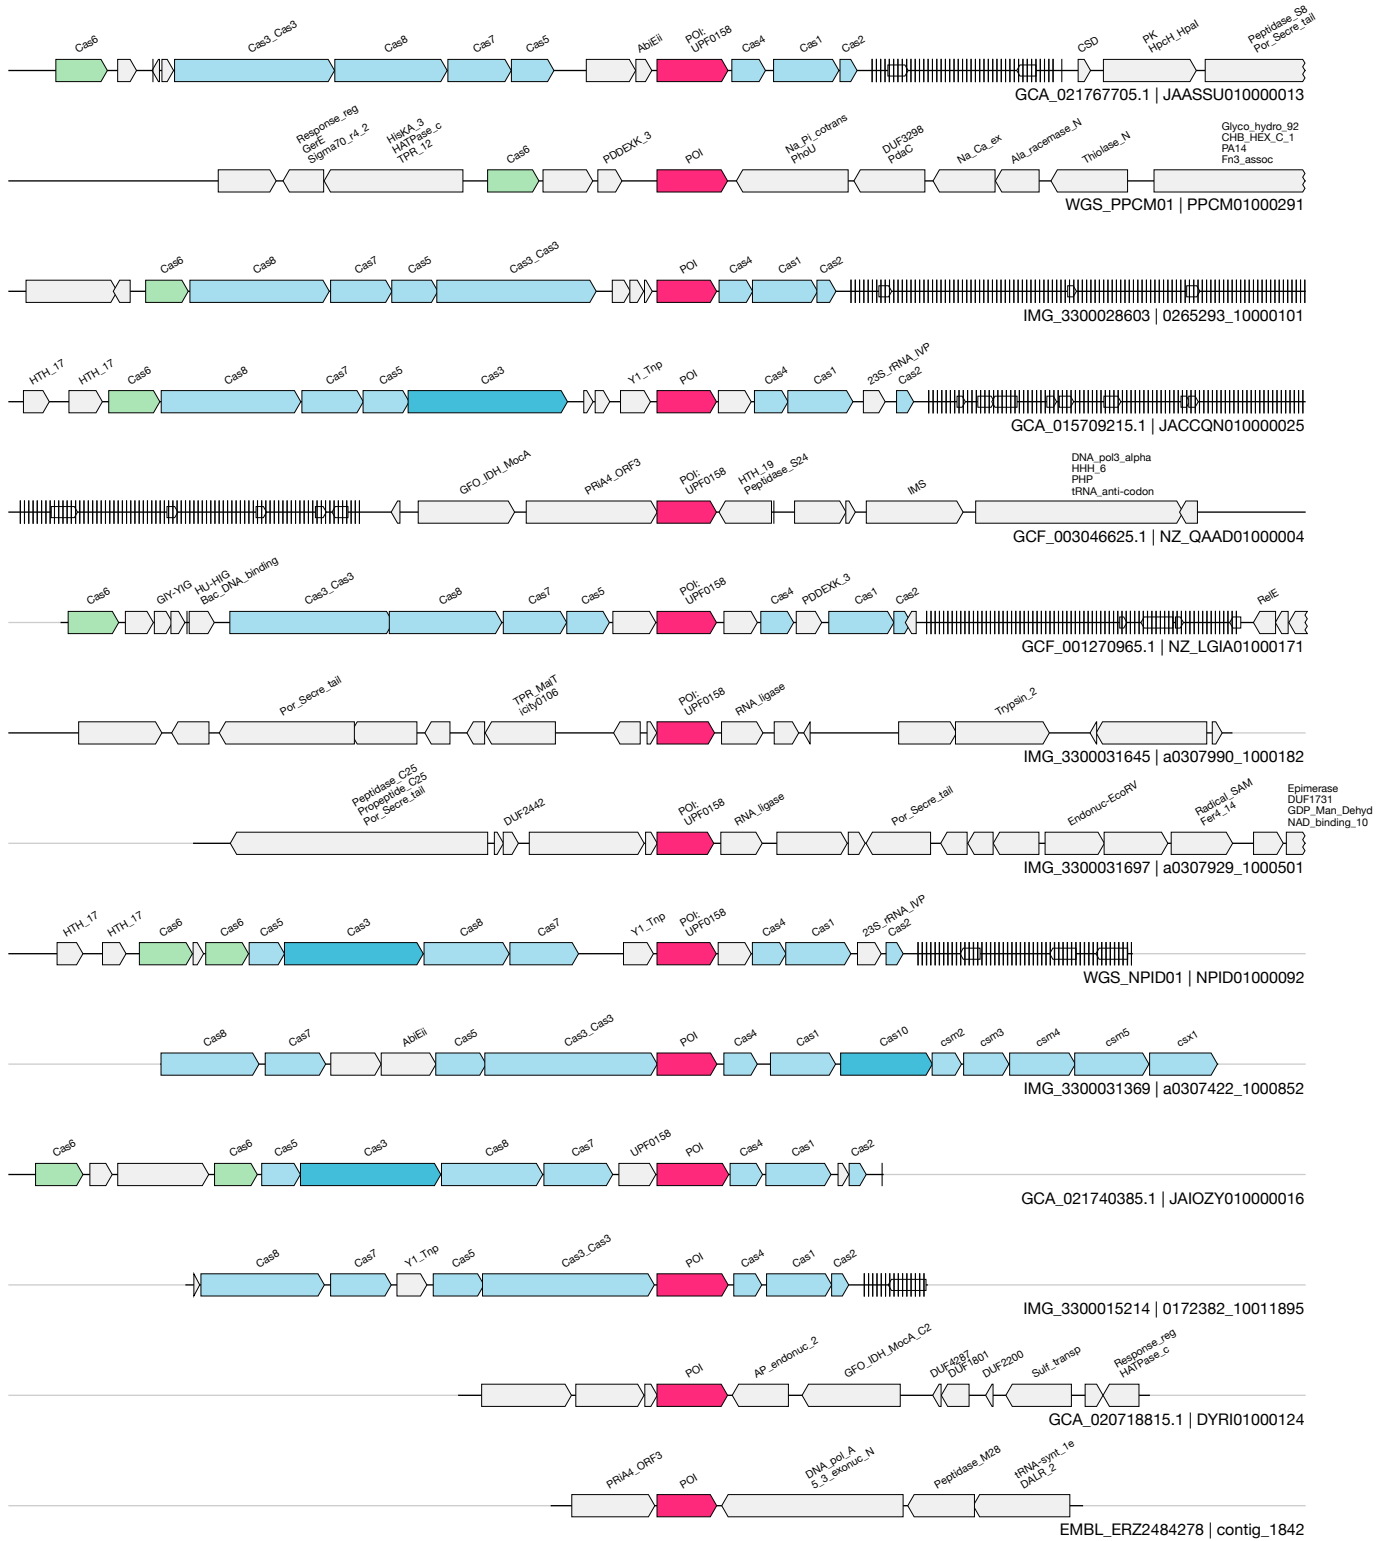

1kb



IMG\_3300018012&&0187810\_10022321&&90\_1506\_-1

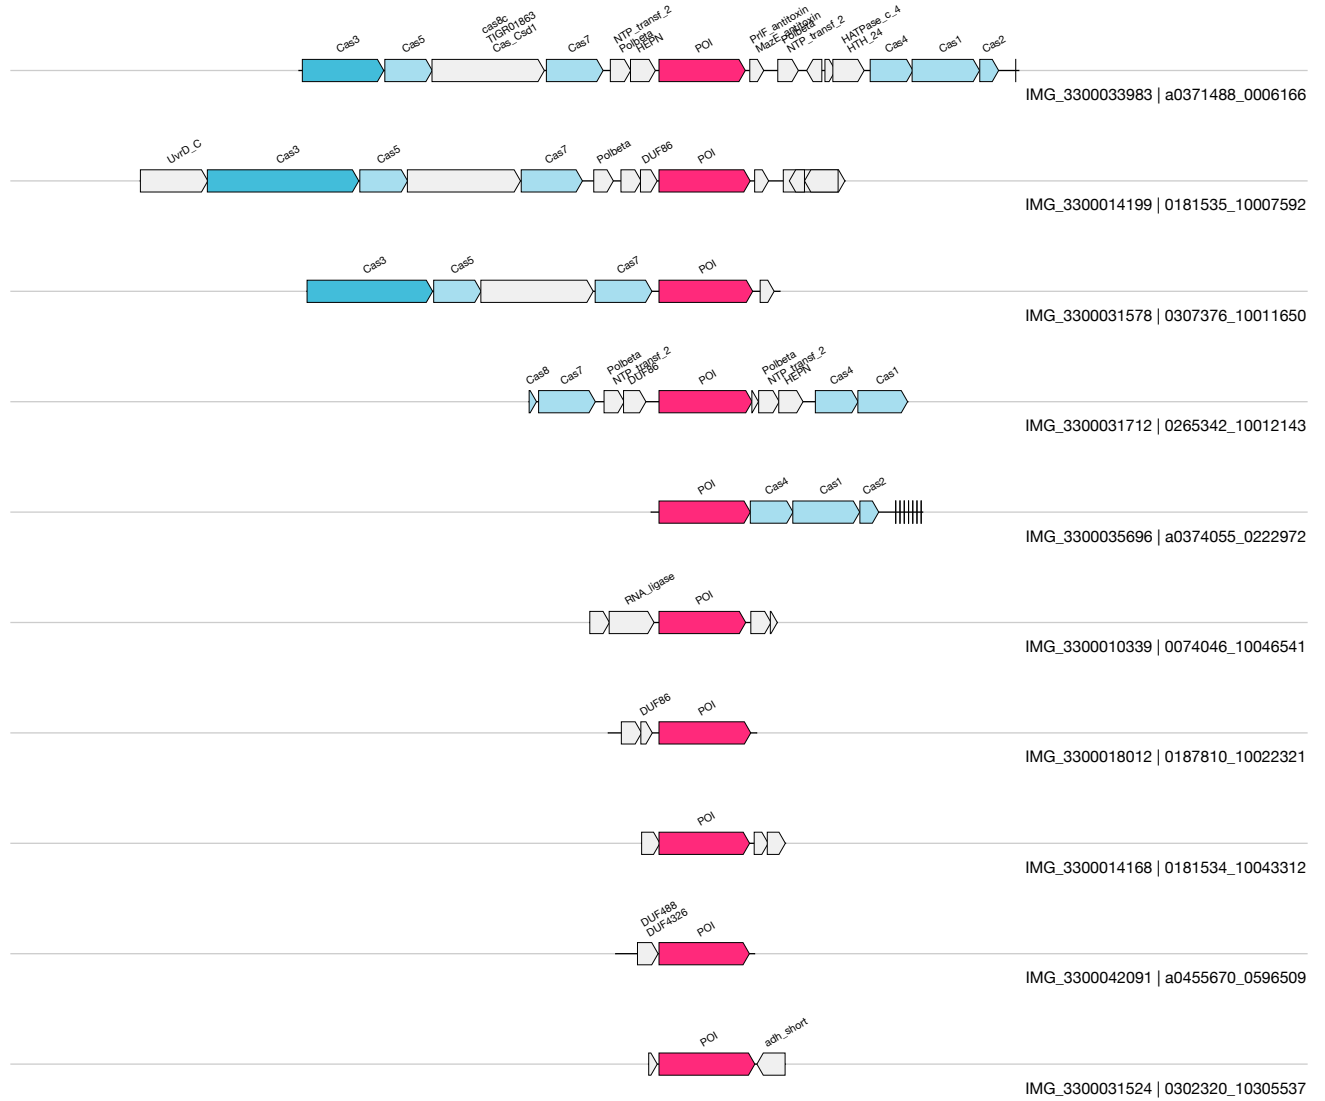

1kb

# EB

**UAS-26**  
Auxiliary

**(DUF87 + NurA 5' to 3' nuclease)**  
IMG\_3300018407&&a0187900\_1000594&&12585\_14151\_-1

4 / 4.0

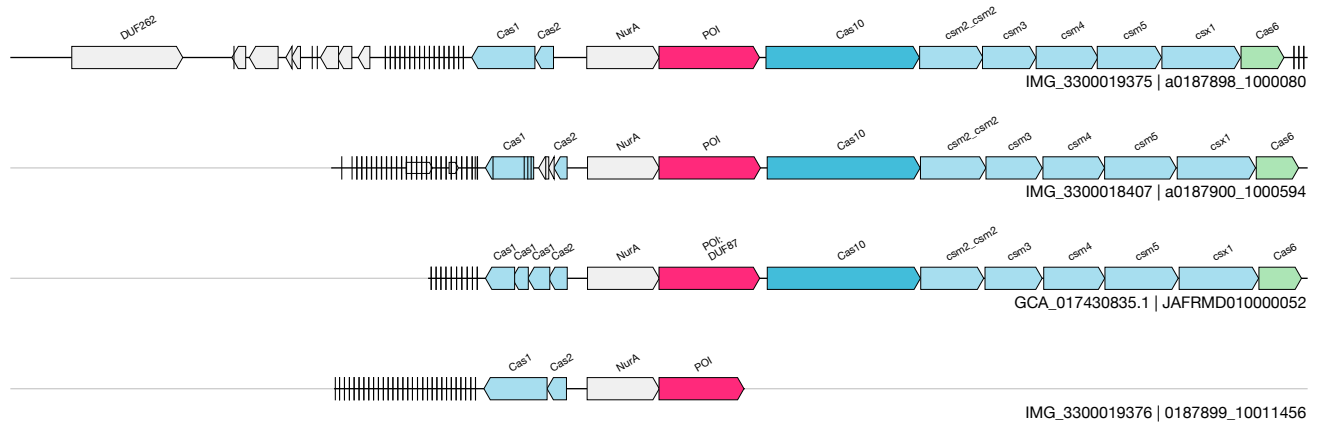

1kb

IMG\_3300020192&&0163147\_10009373&&460\_1681\_-1

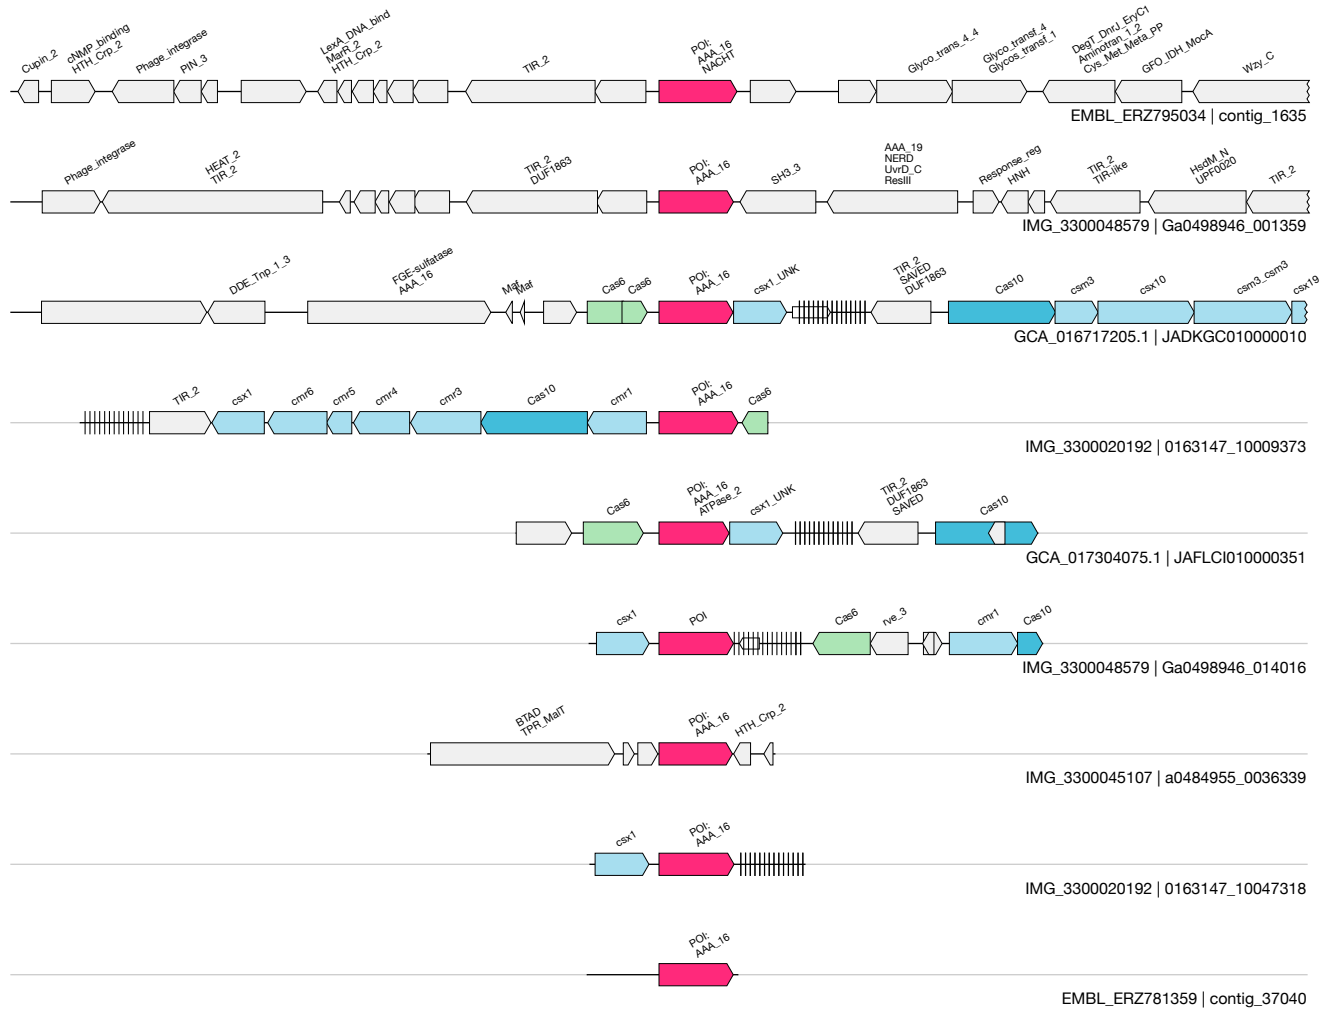

1kb

ED

**UAS-128**  
Auxiliary

**(Mrr nuclease)**

N/A

IMG\_3300024353&&a0209979\_1002041&&5779\_7255\_-1

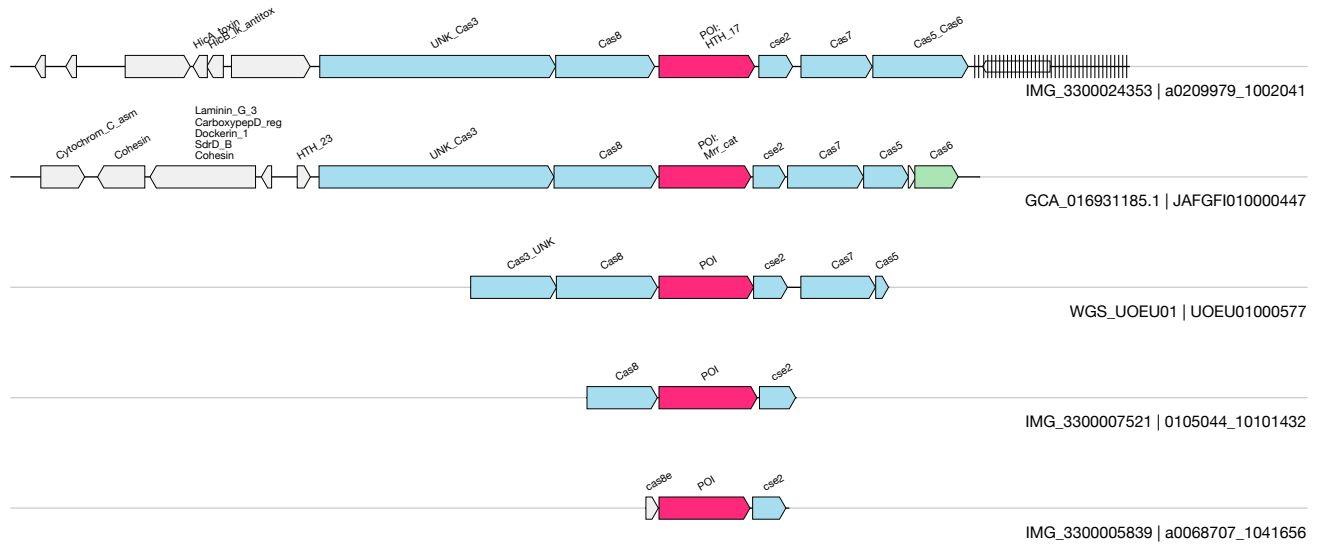

1kb

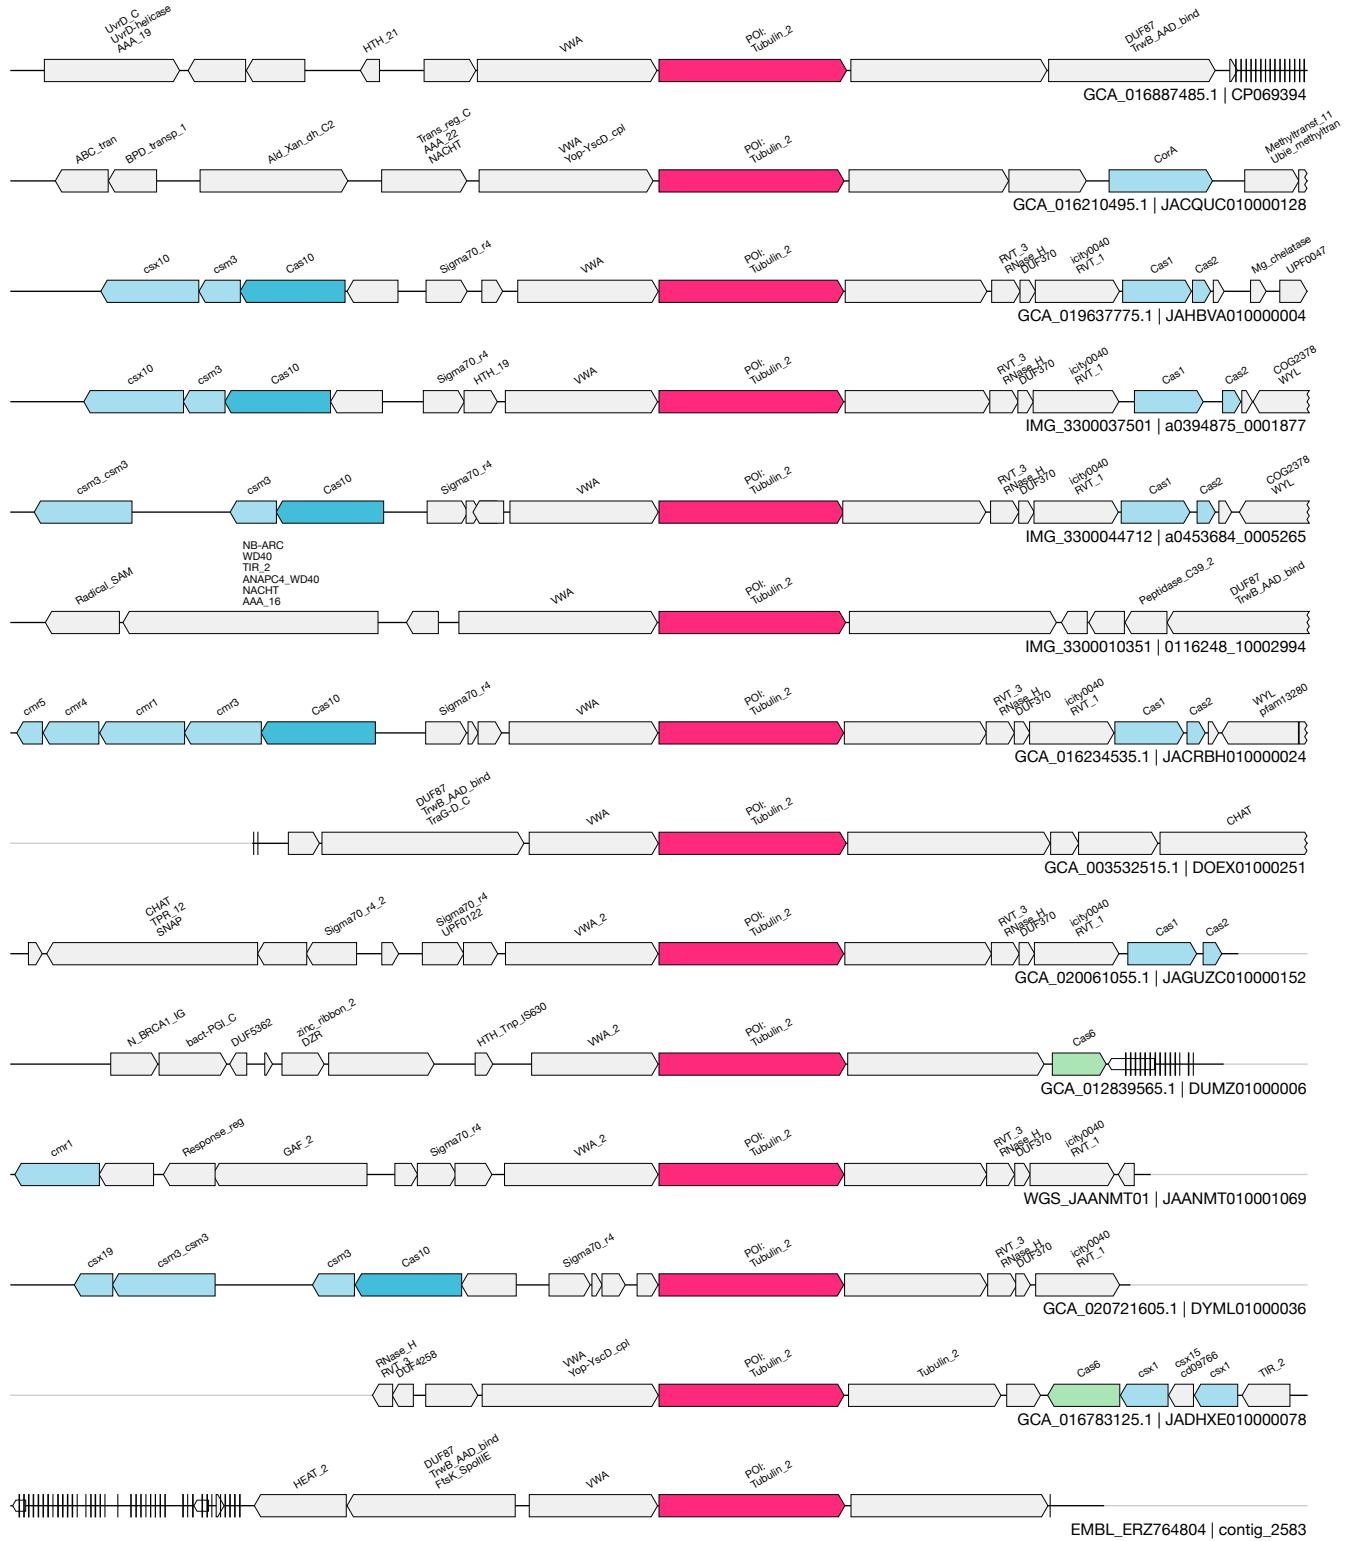

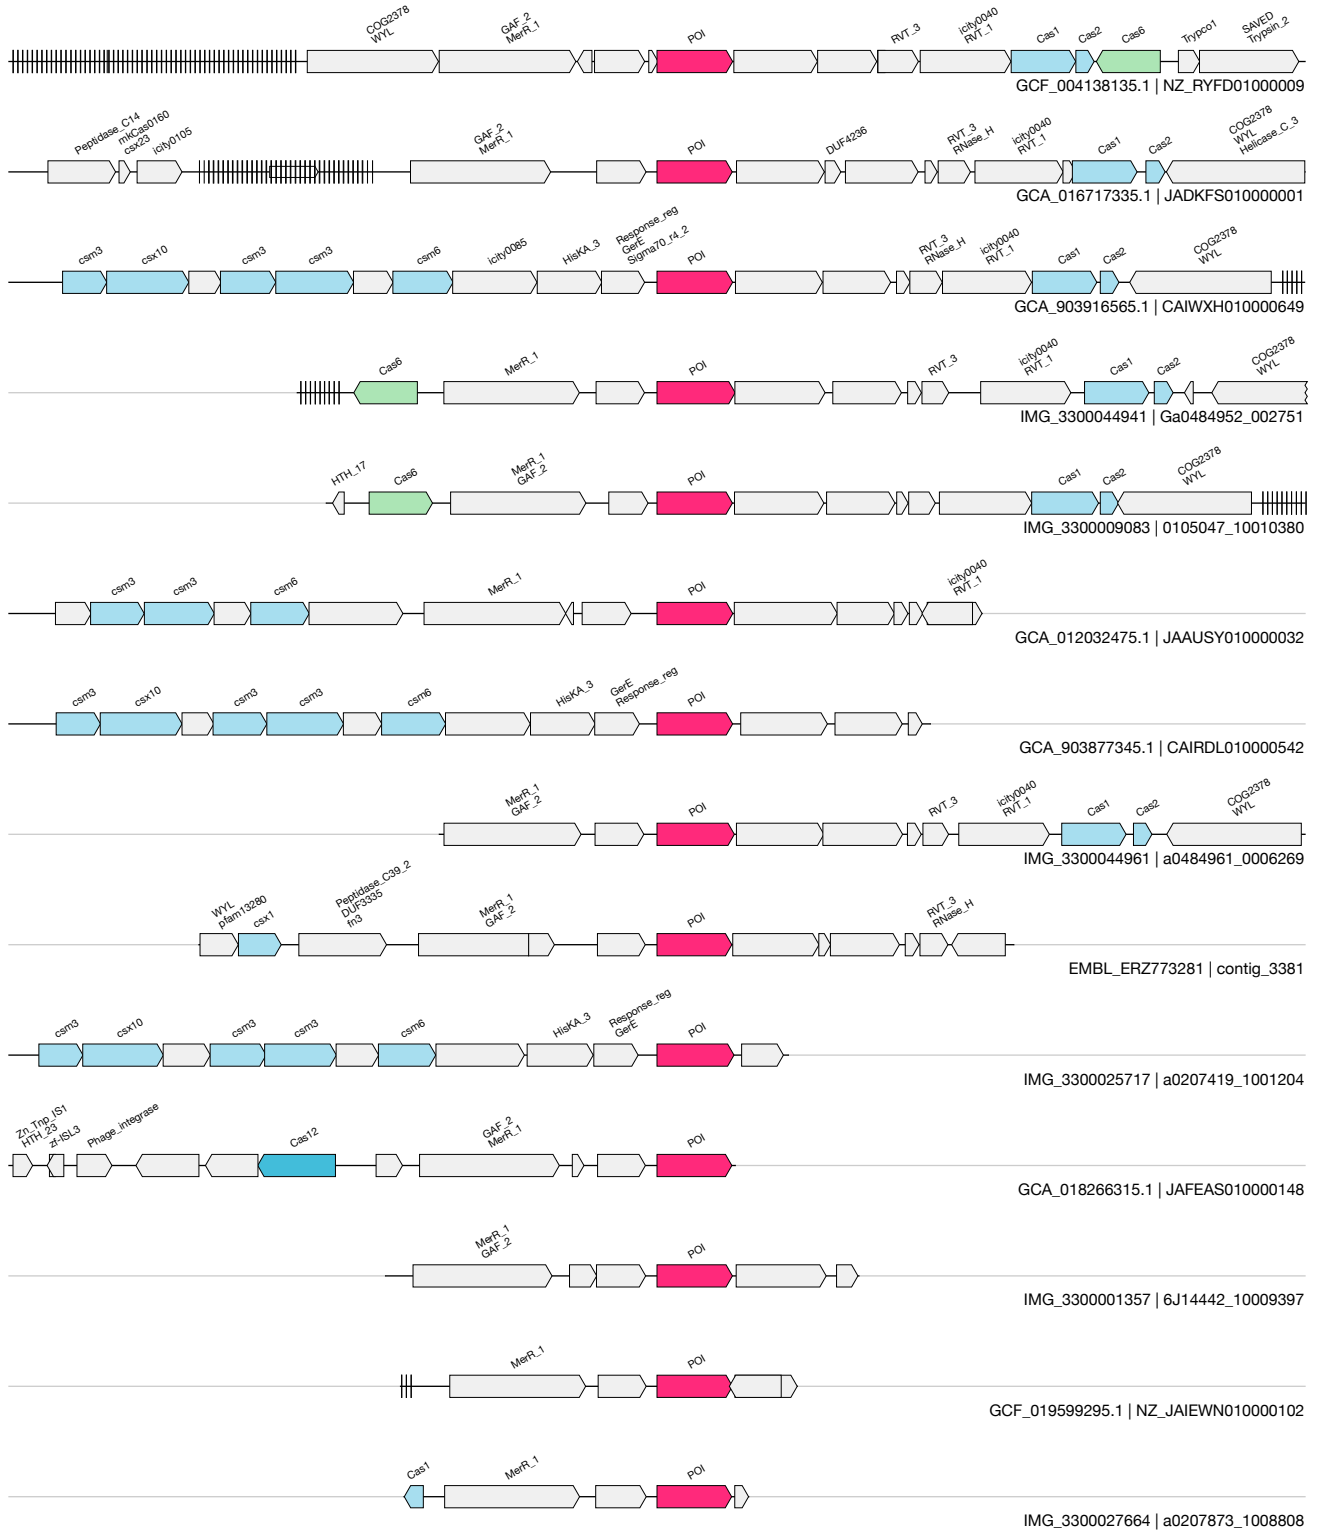

1kb

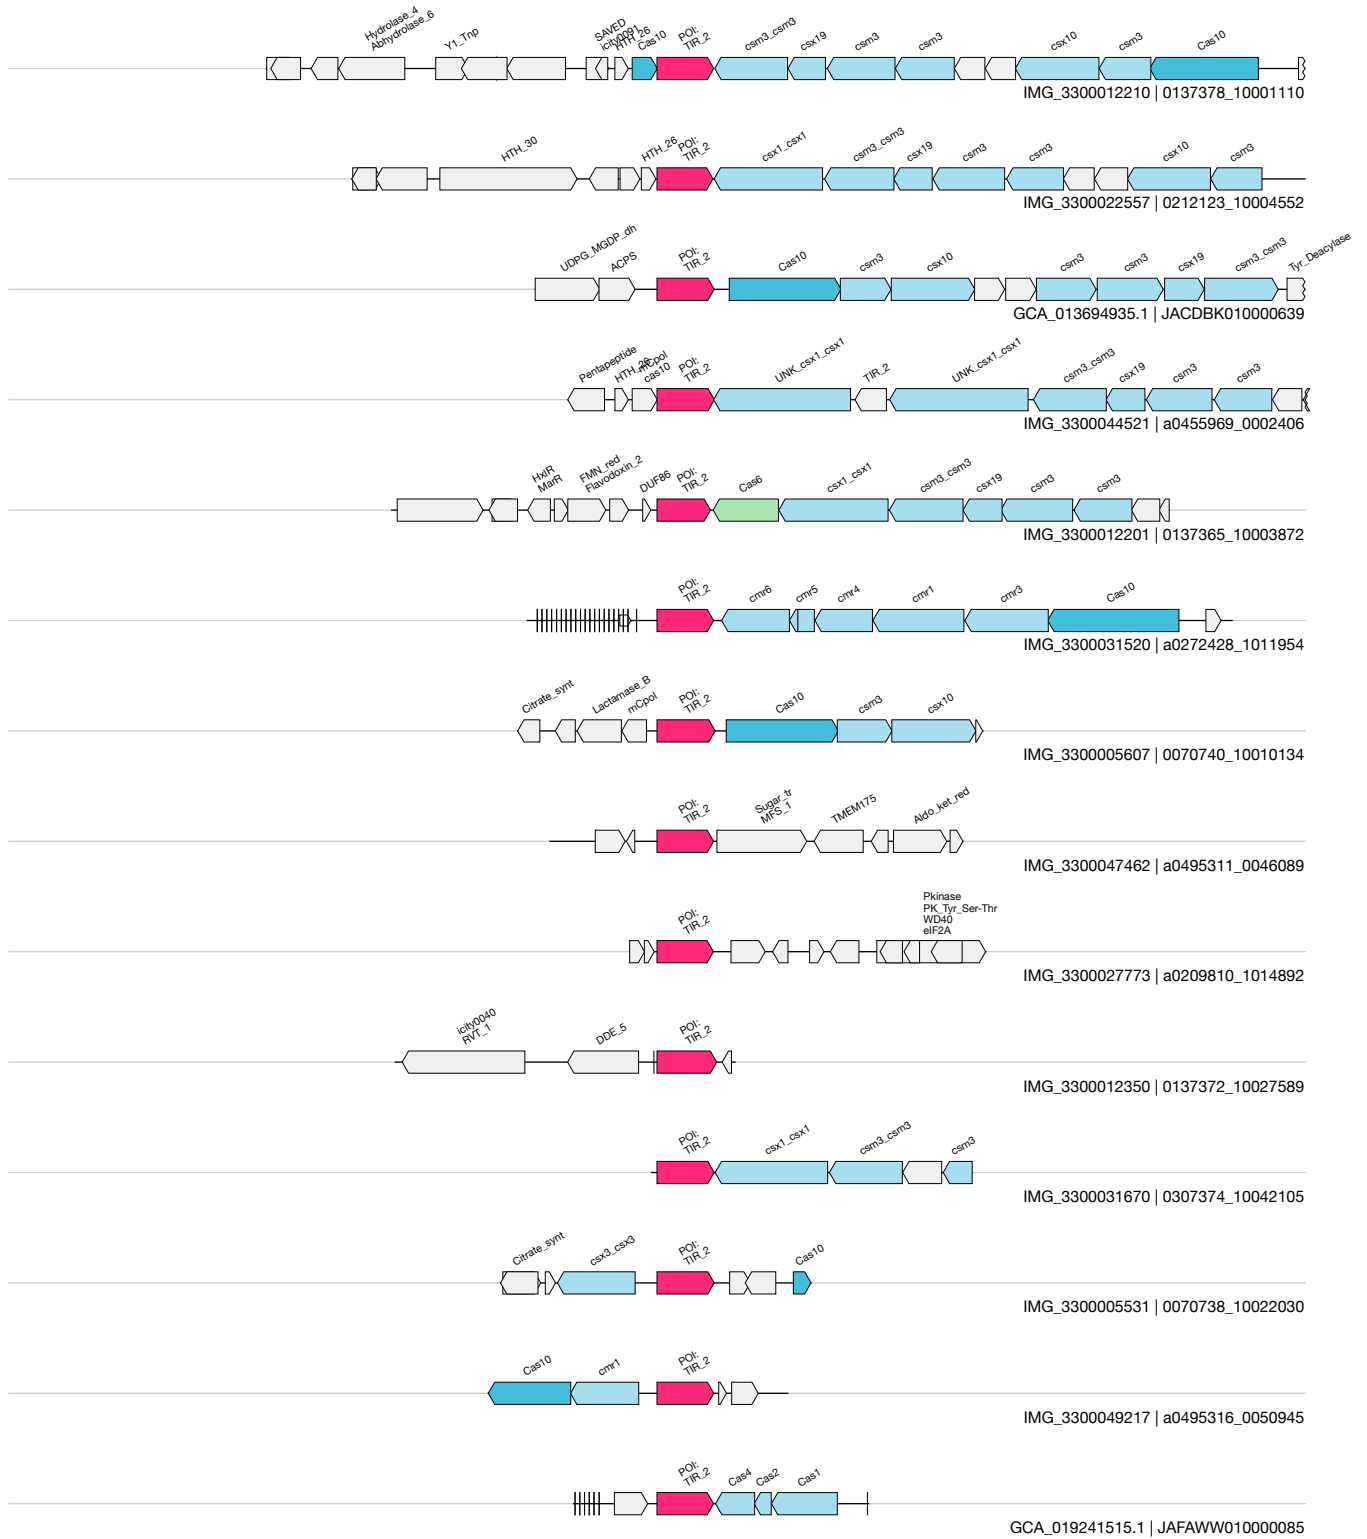

1kb

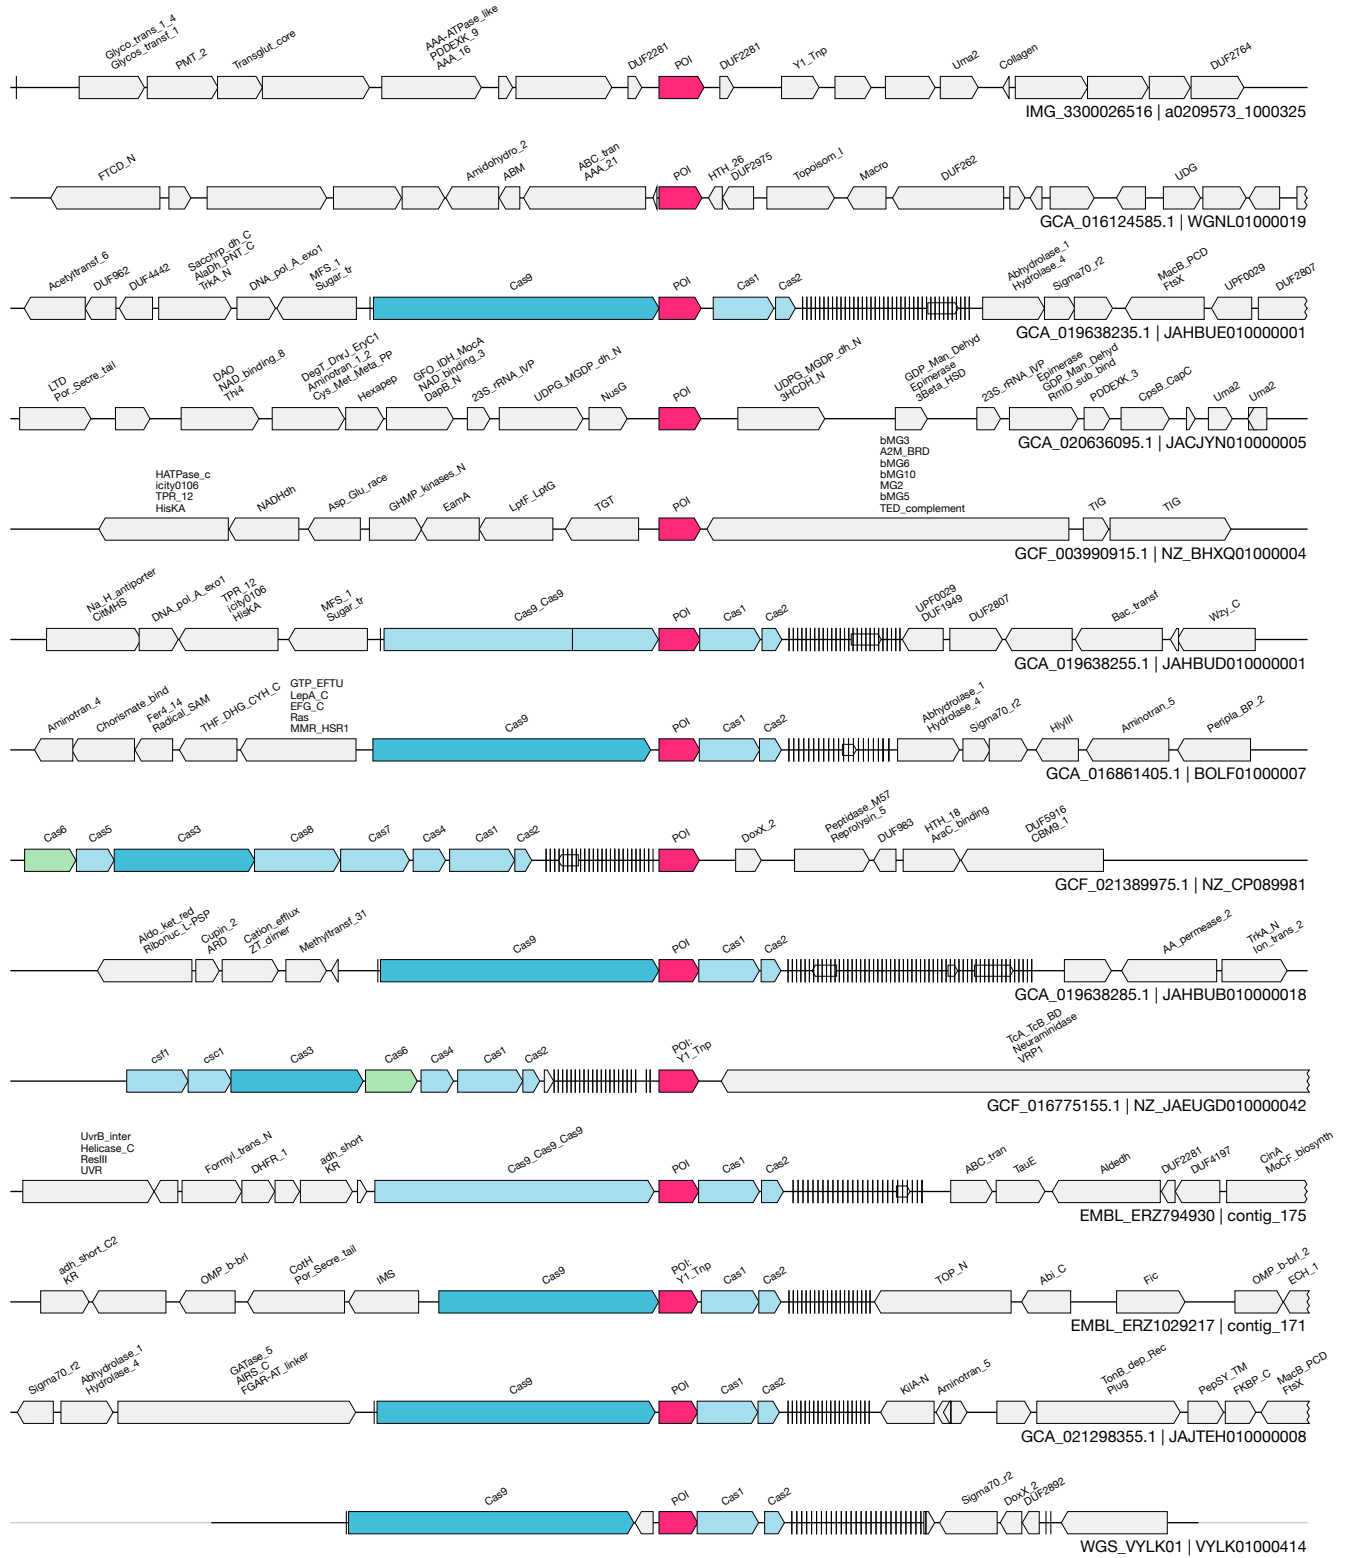

1kb



EI

**UAS-133**  
Auxiliary

**(TPR Rho RNA binding)**  
IMG\_3300026546&&0256913\_10013832&&2\_1481\_1

5 / 6.4

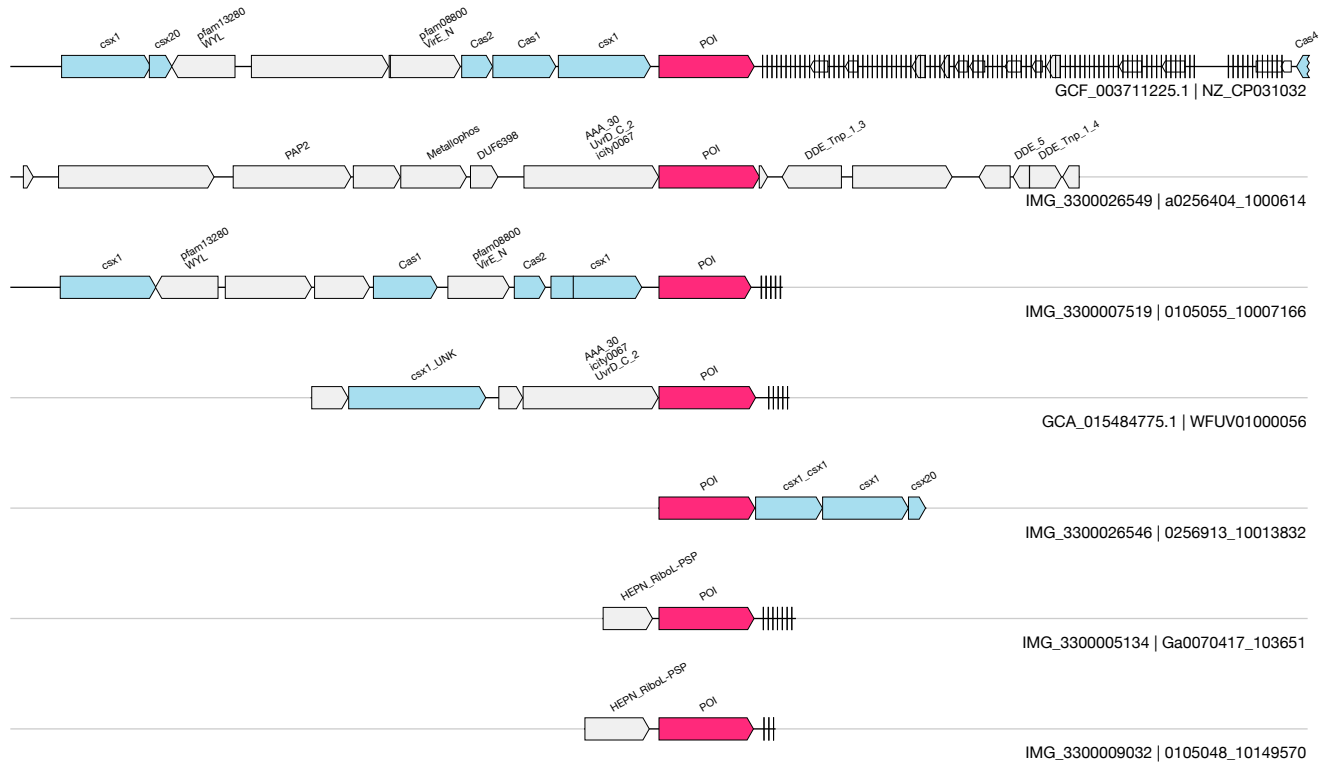

1kb

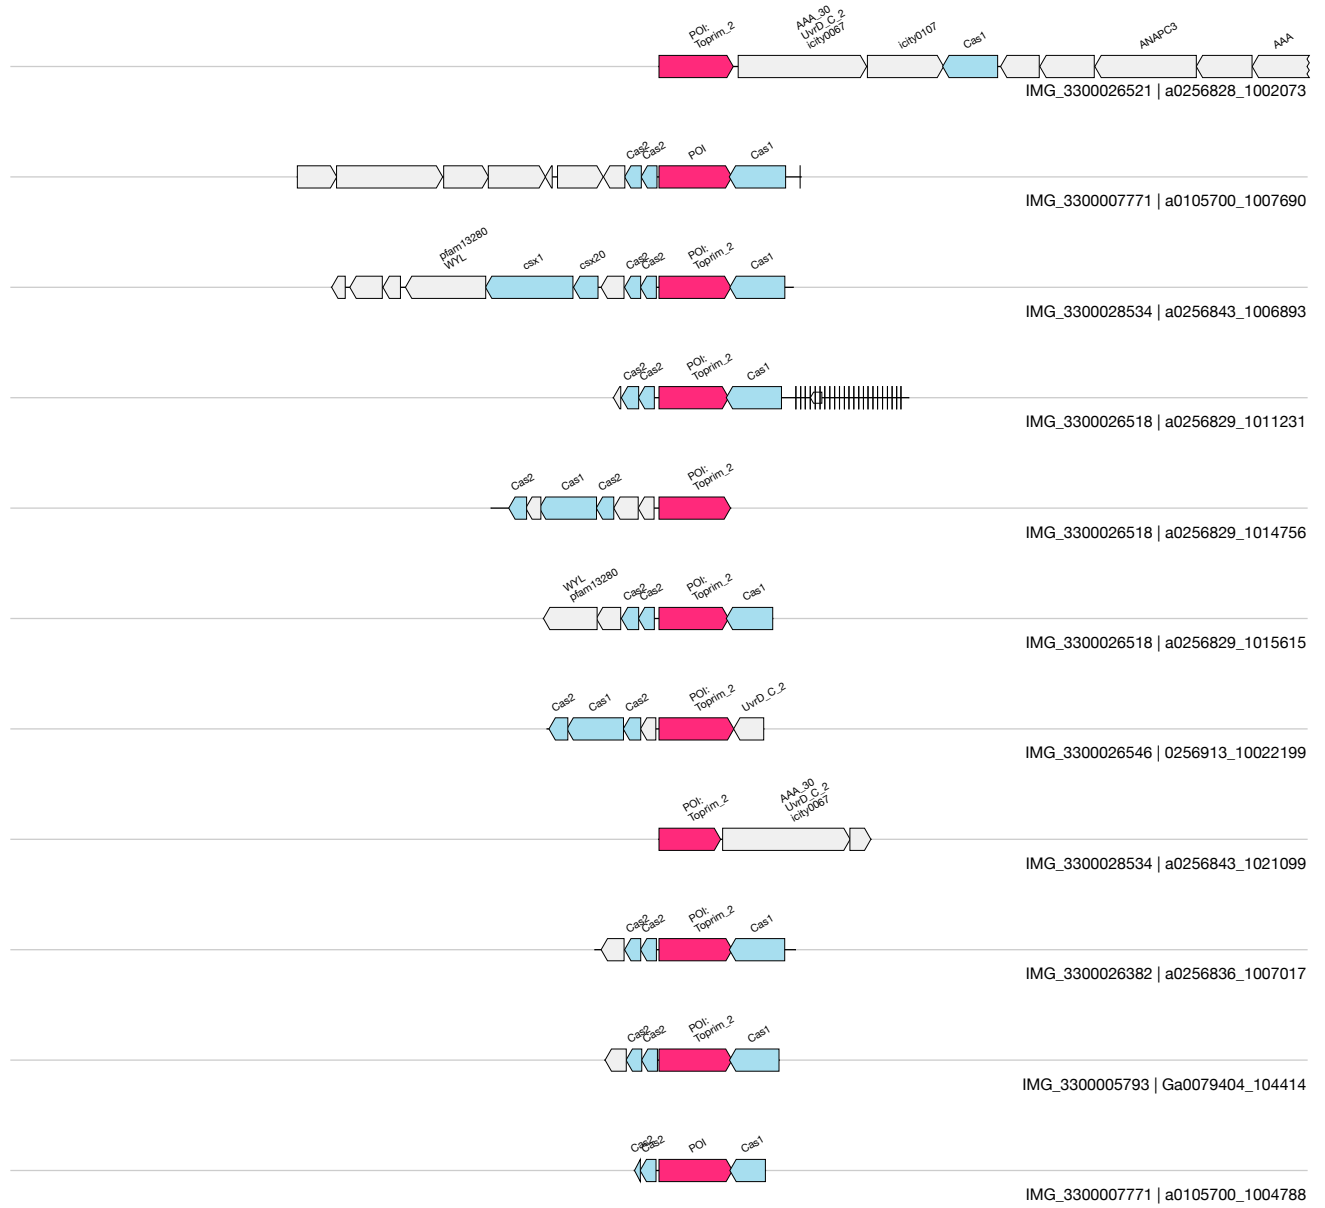

1kb

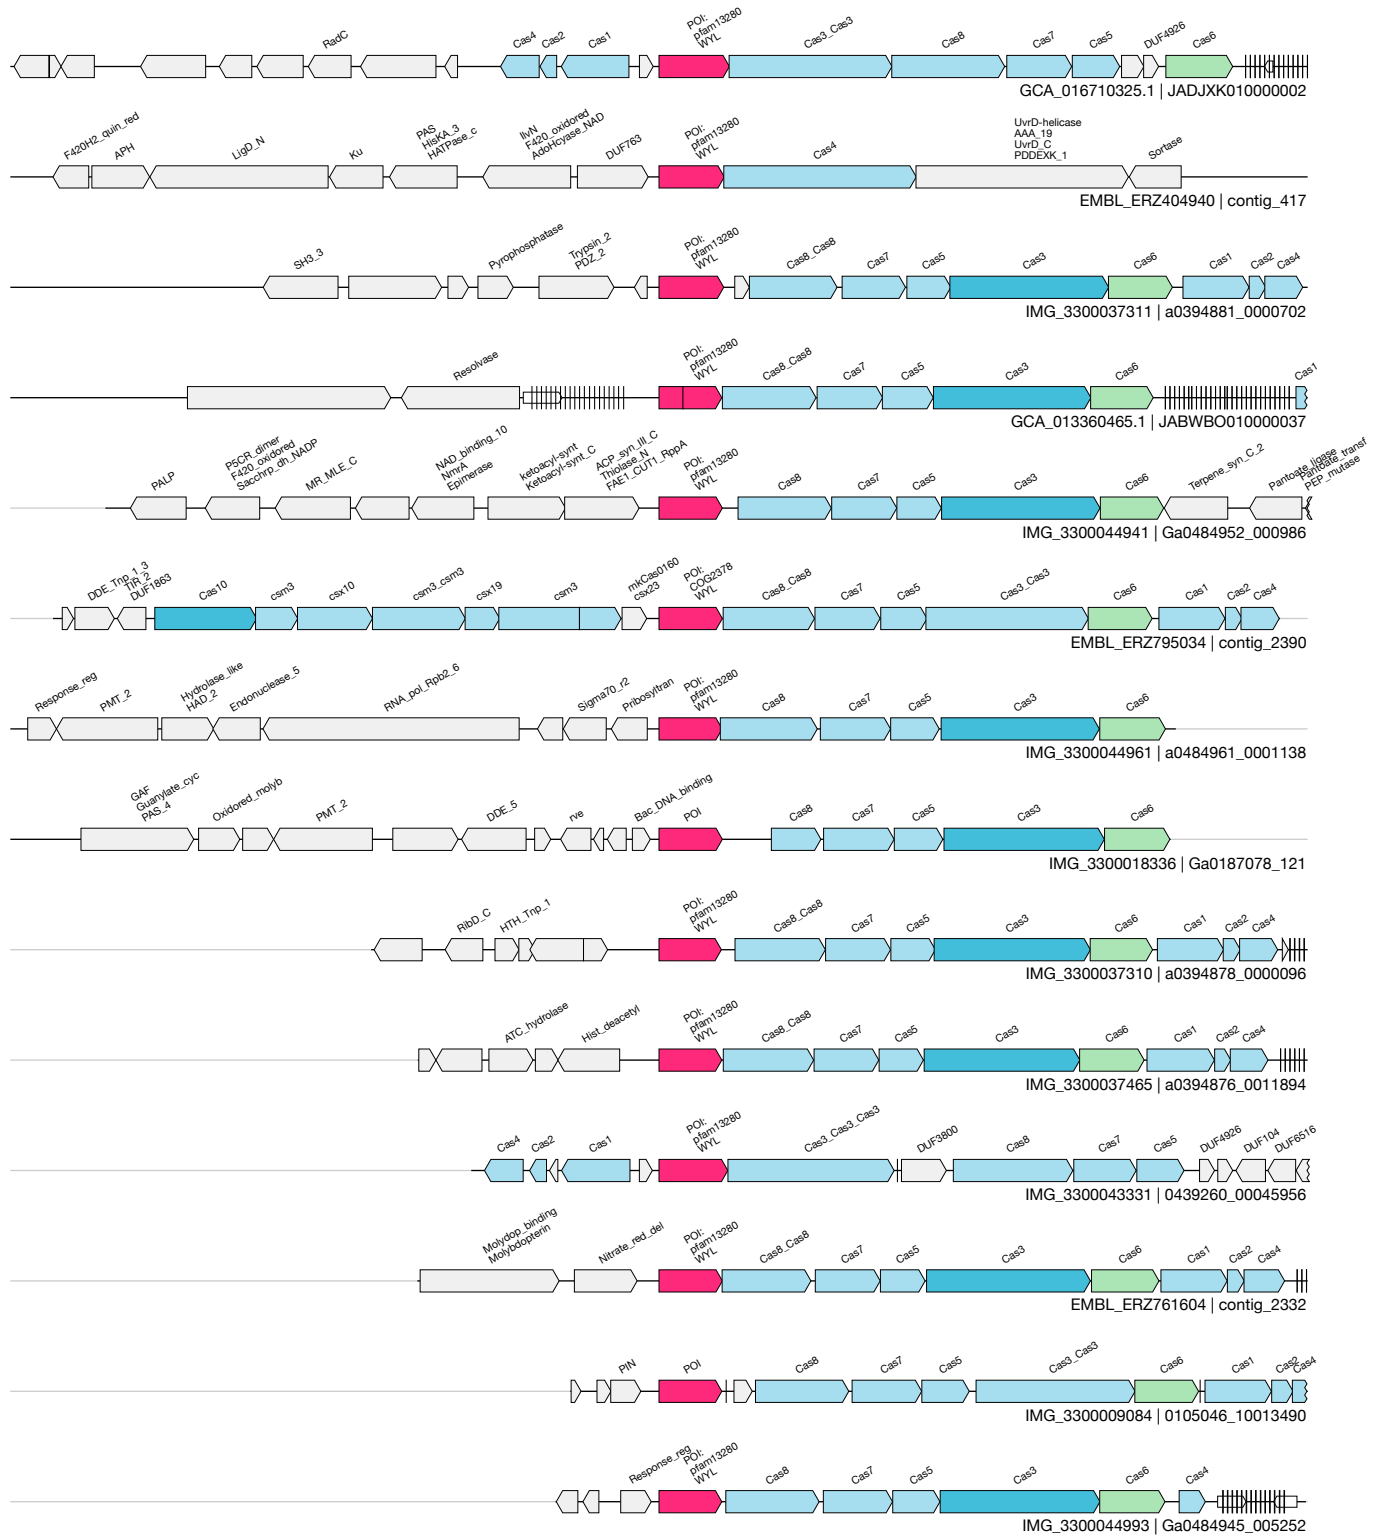

1kb

EL

**UAS-135**  
Auxiliary

**(ATPase\_DUF4435 + Cas12)**  
IMG\_3300028048&&0256405\_10015800&&2772\_4671\_-1

3 / 3.0

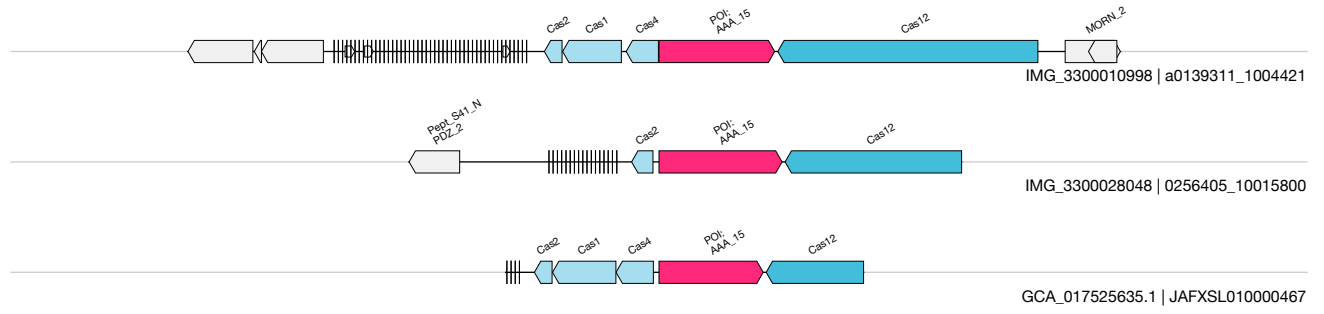

1kb

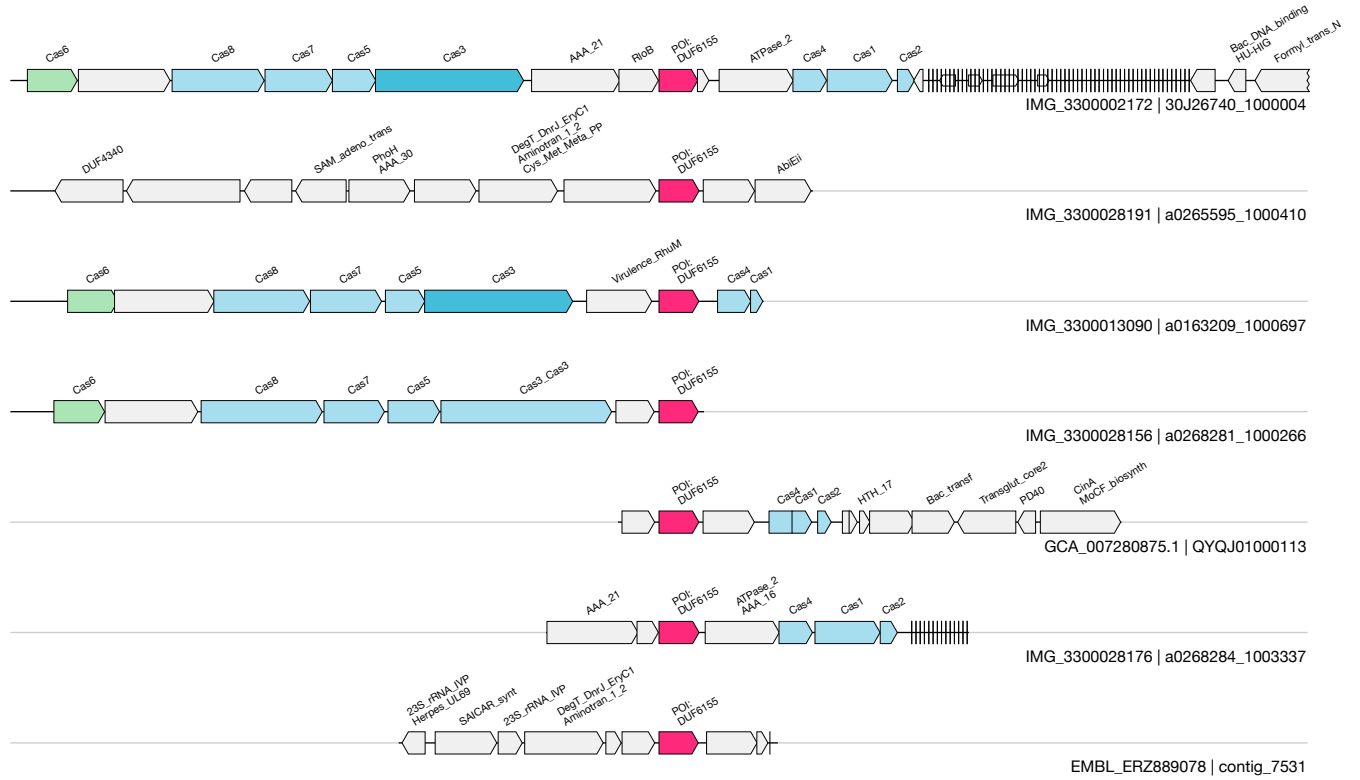

1kb

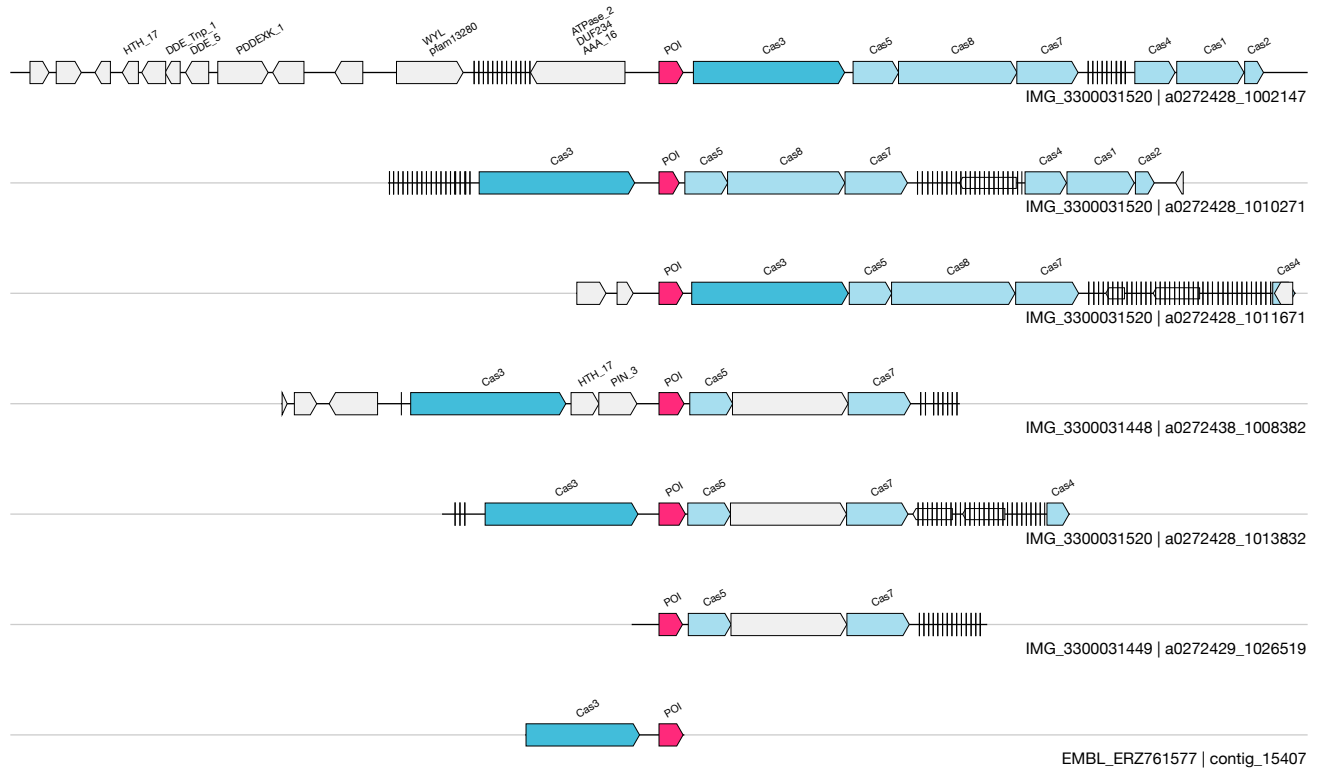

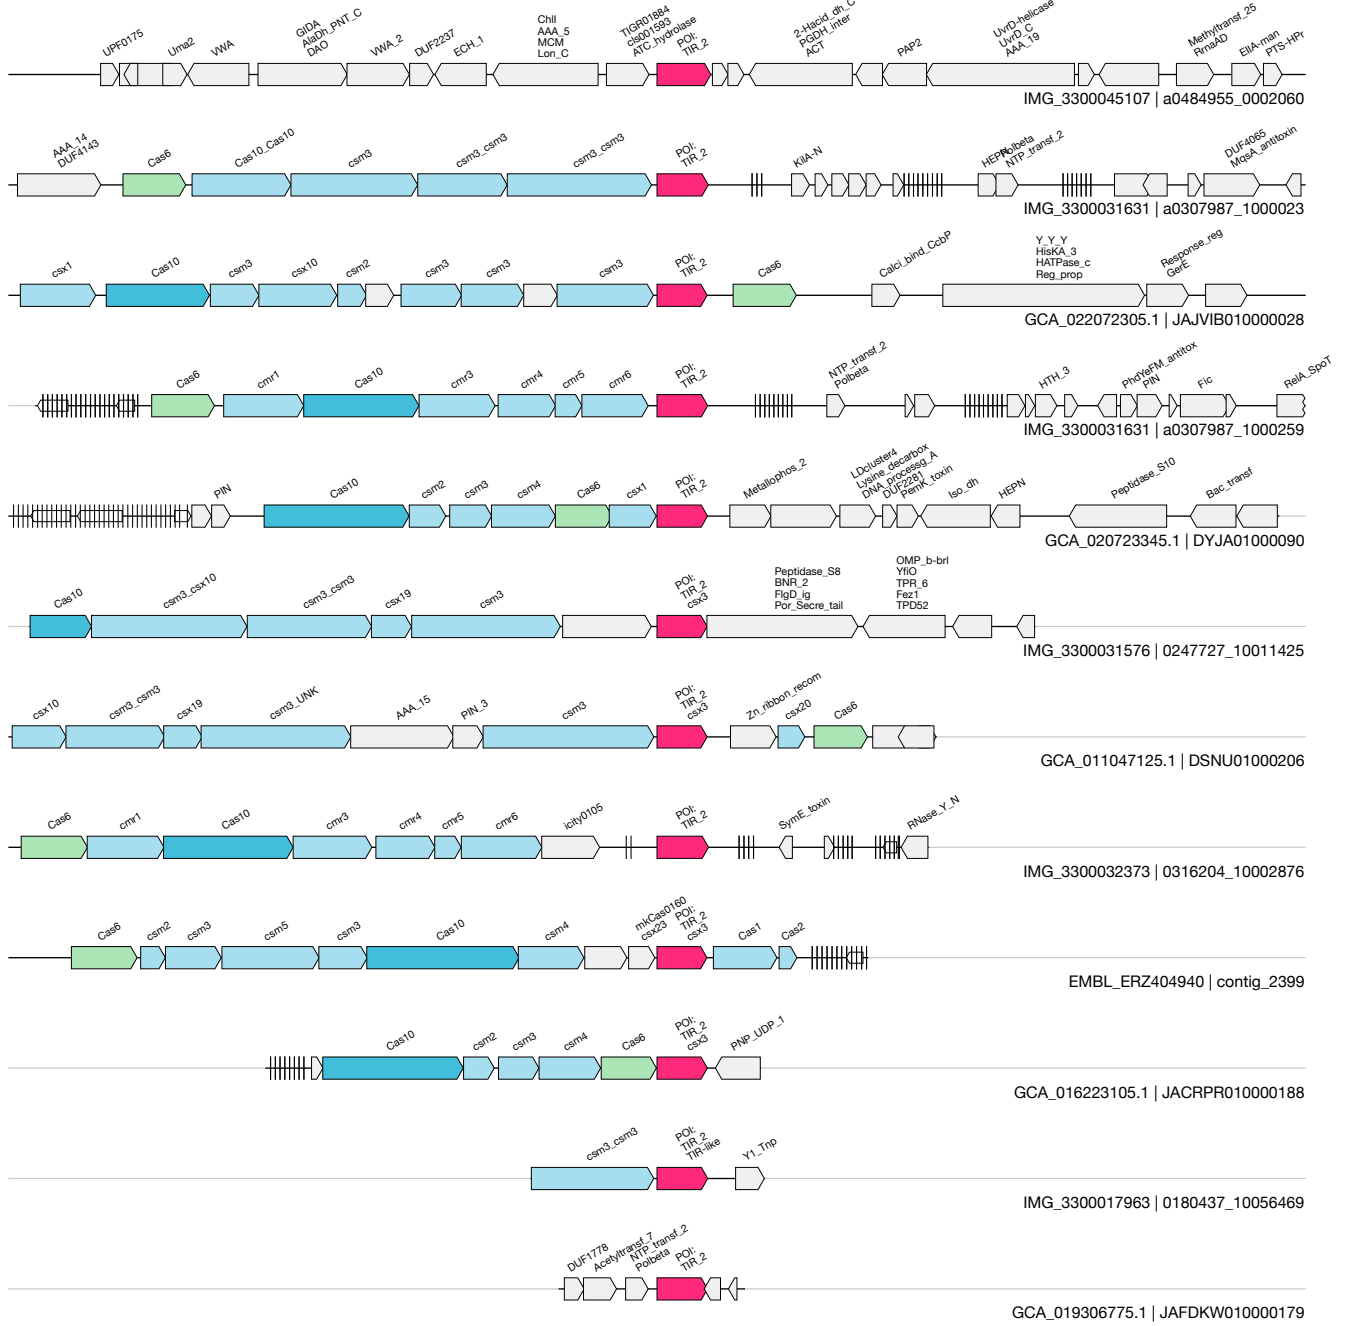

1kb

IMG\_3300031654&&a0315549\_1044866&&183\_2397\_-1

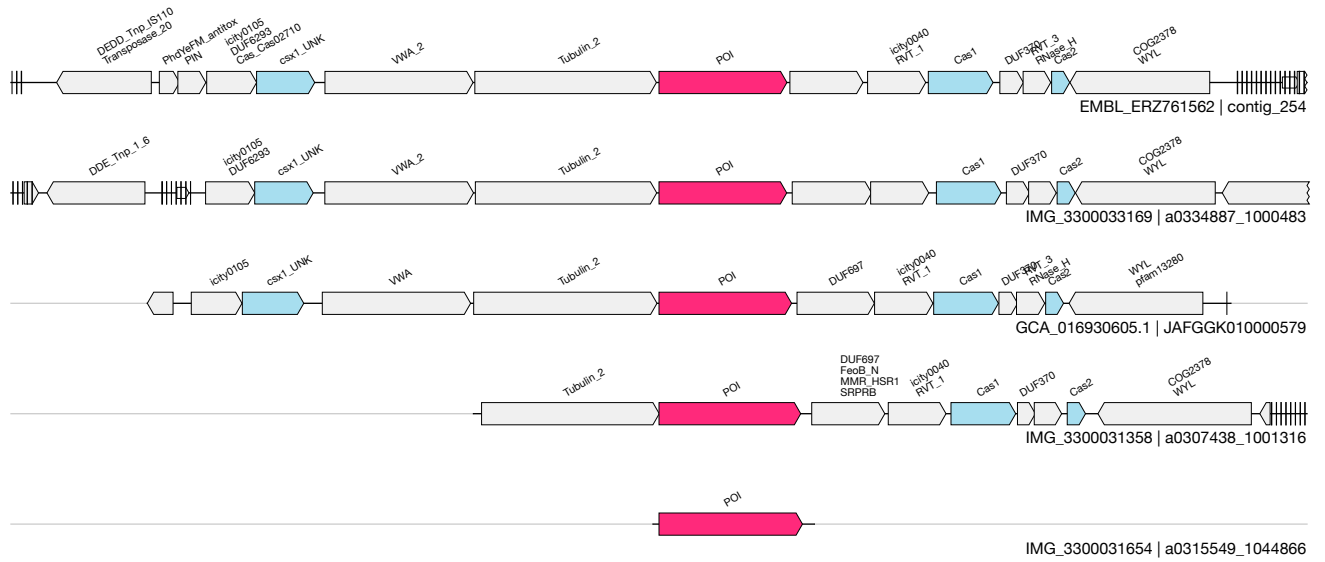



EQ

**UAS-140**  
Auxiliary

**(DUF5919)**

2 / 3.0

IMG\_3300031670&&0307374\_10003486&&16416\_17127\_1

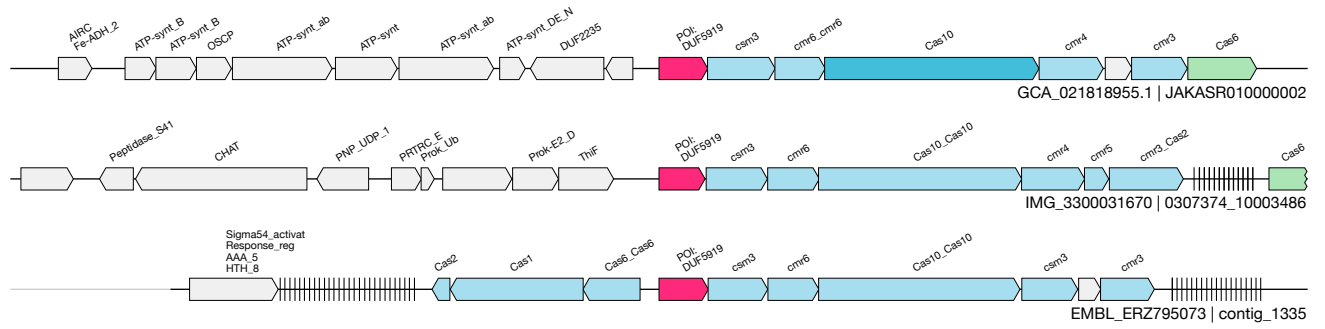

1kb

ER

**UAS-141**  
Auxiliary

**(PriA4 ORF3)**

2 / 3.9

IMG\_3300031911&&0307412\_10000093&&68229\_68721\_-1

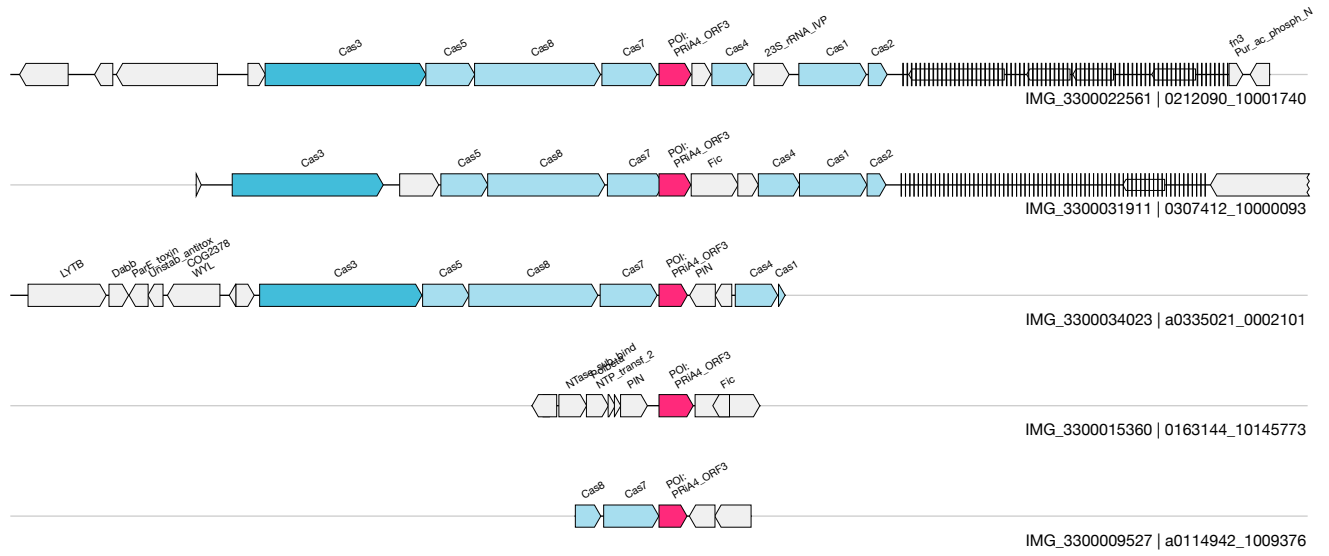

1kb

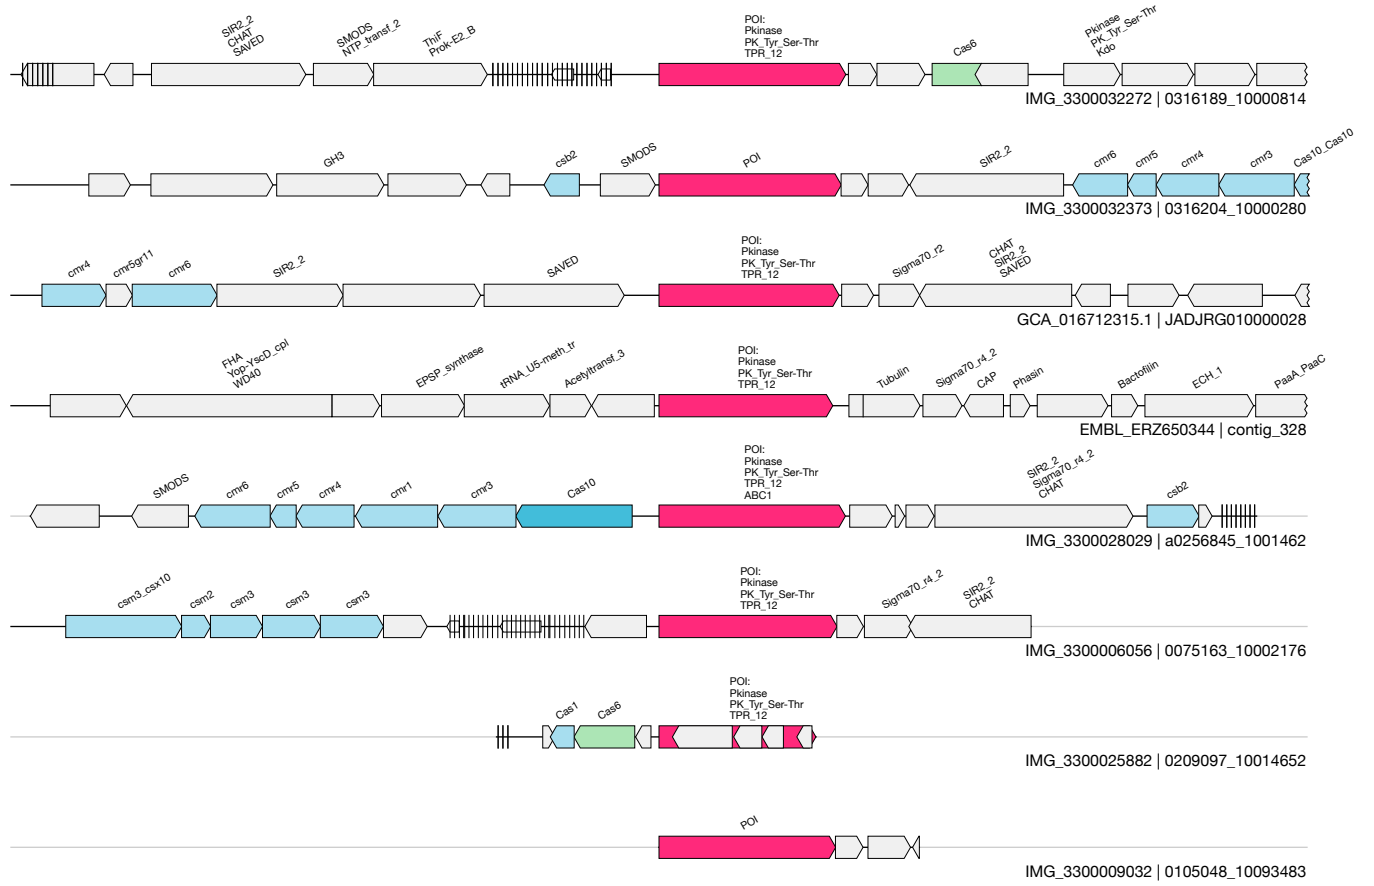

1kb

ET

**UAS-143**  
Auxiliary

**(EamA\_F420H2\_quin\_red)**  
IMG\_3300033167&&a0334898\_1003770&&3048\_4593\_-1

3 / 3.0

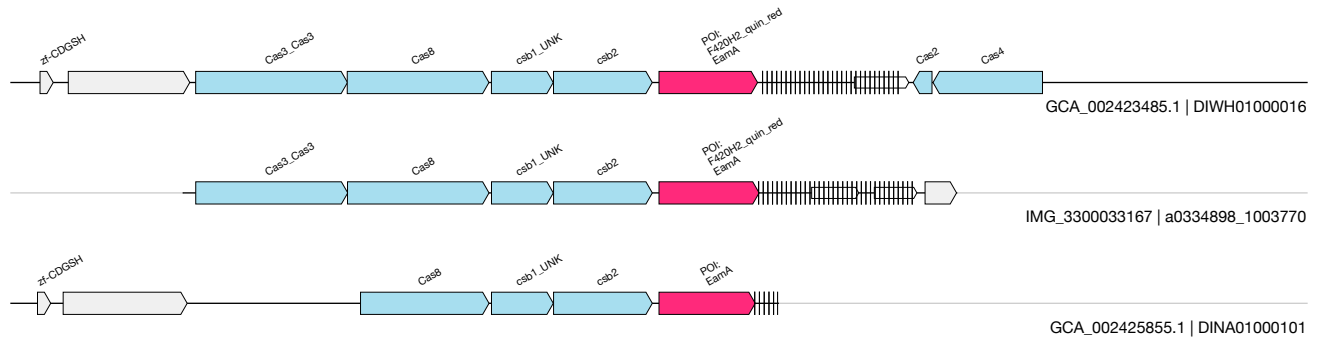

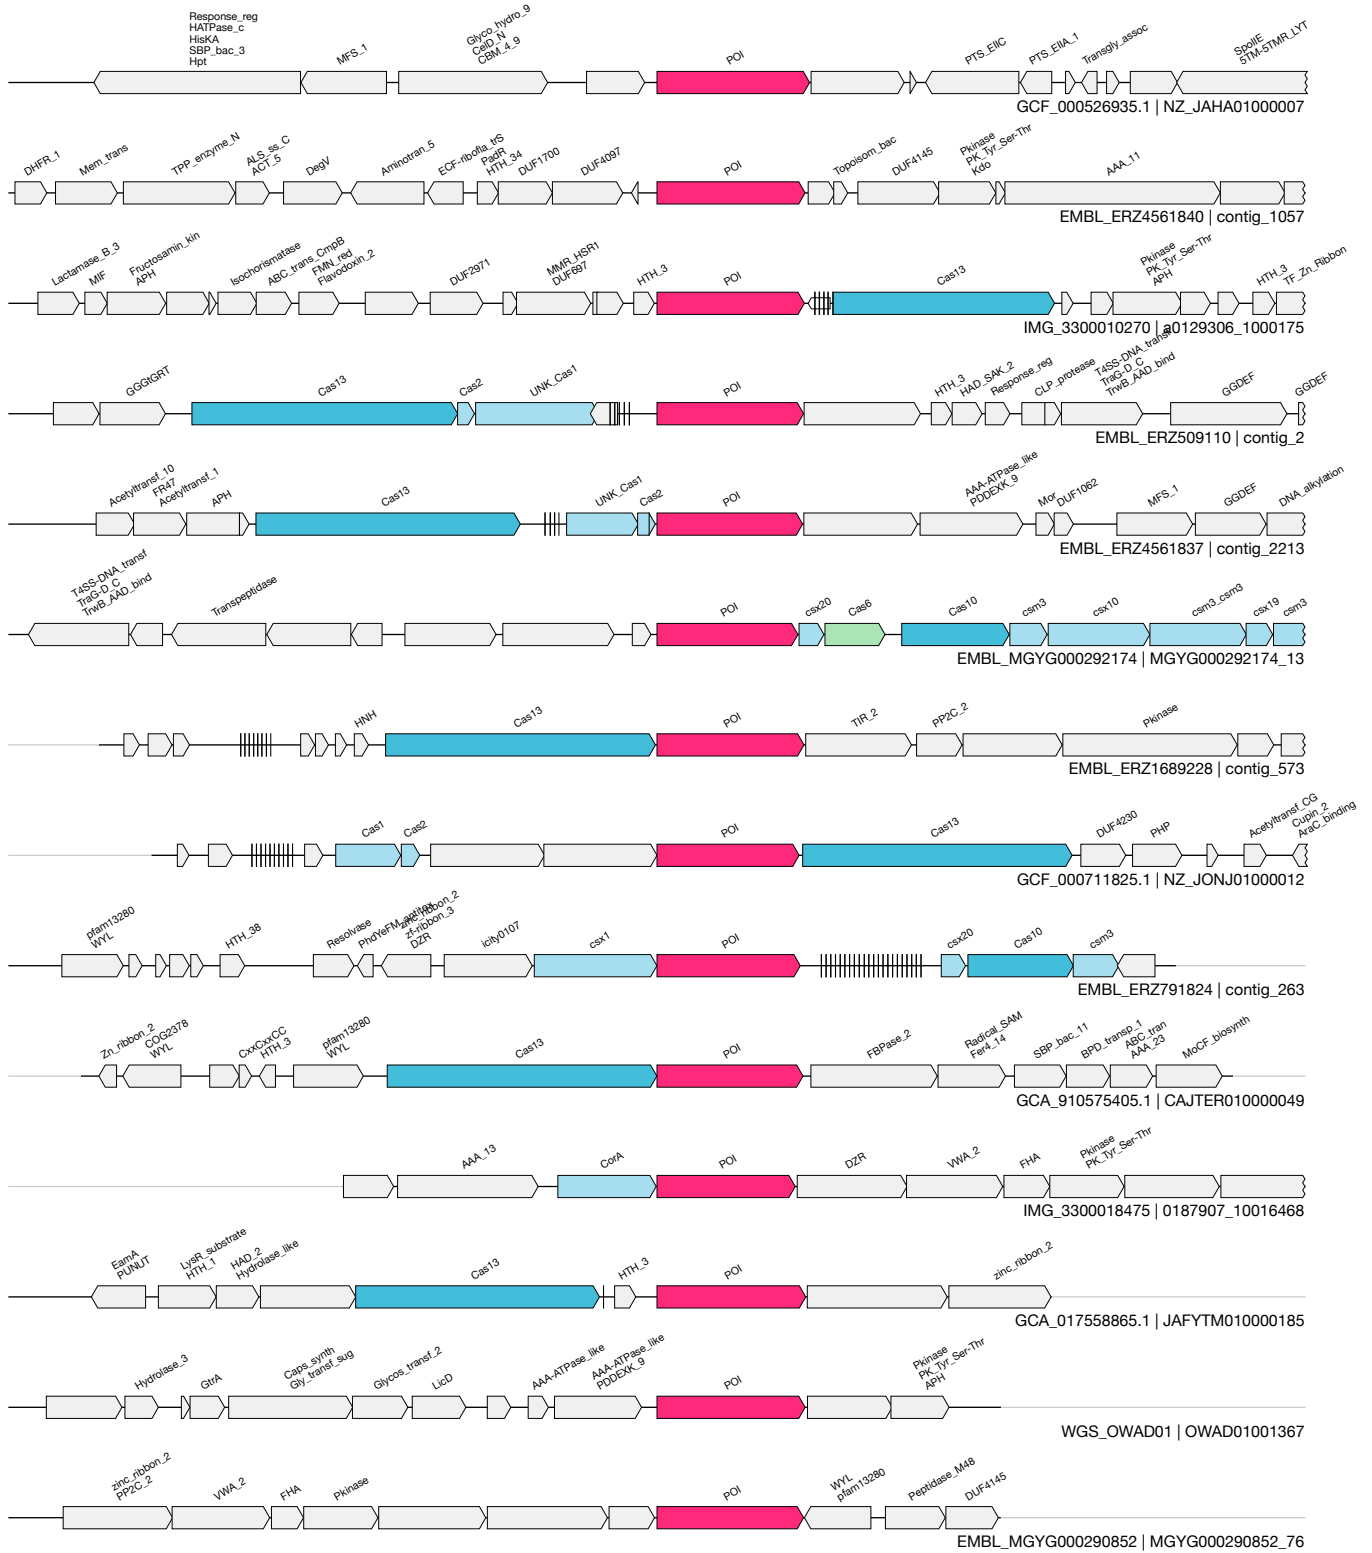

1kb

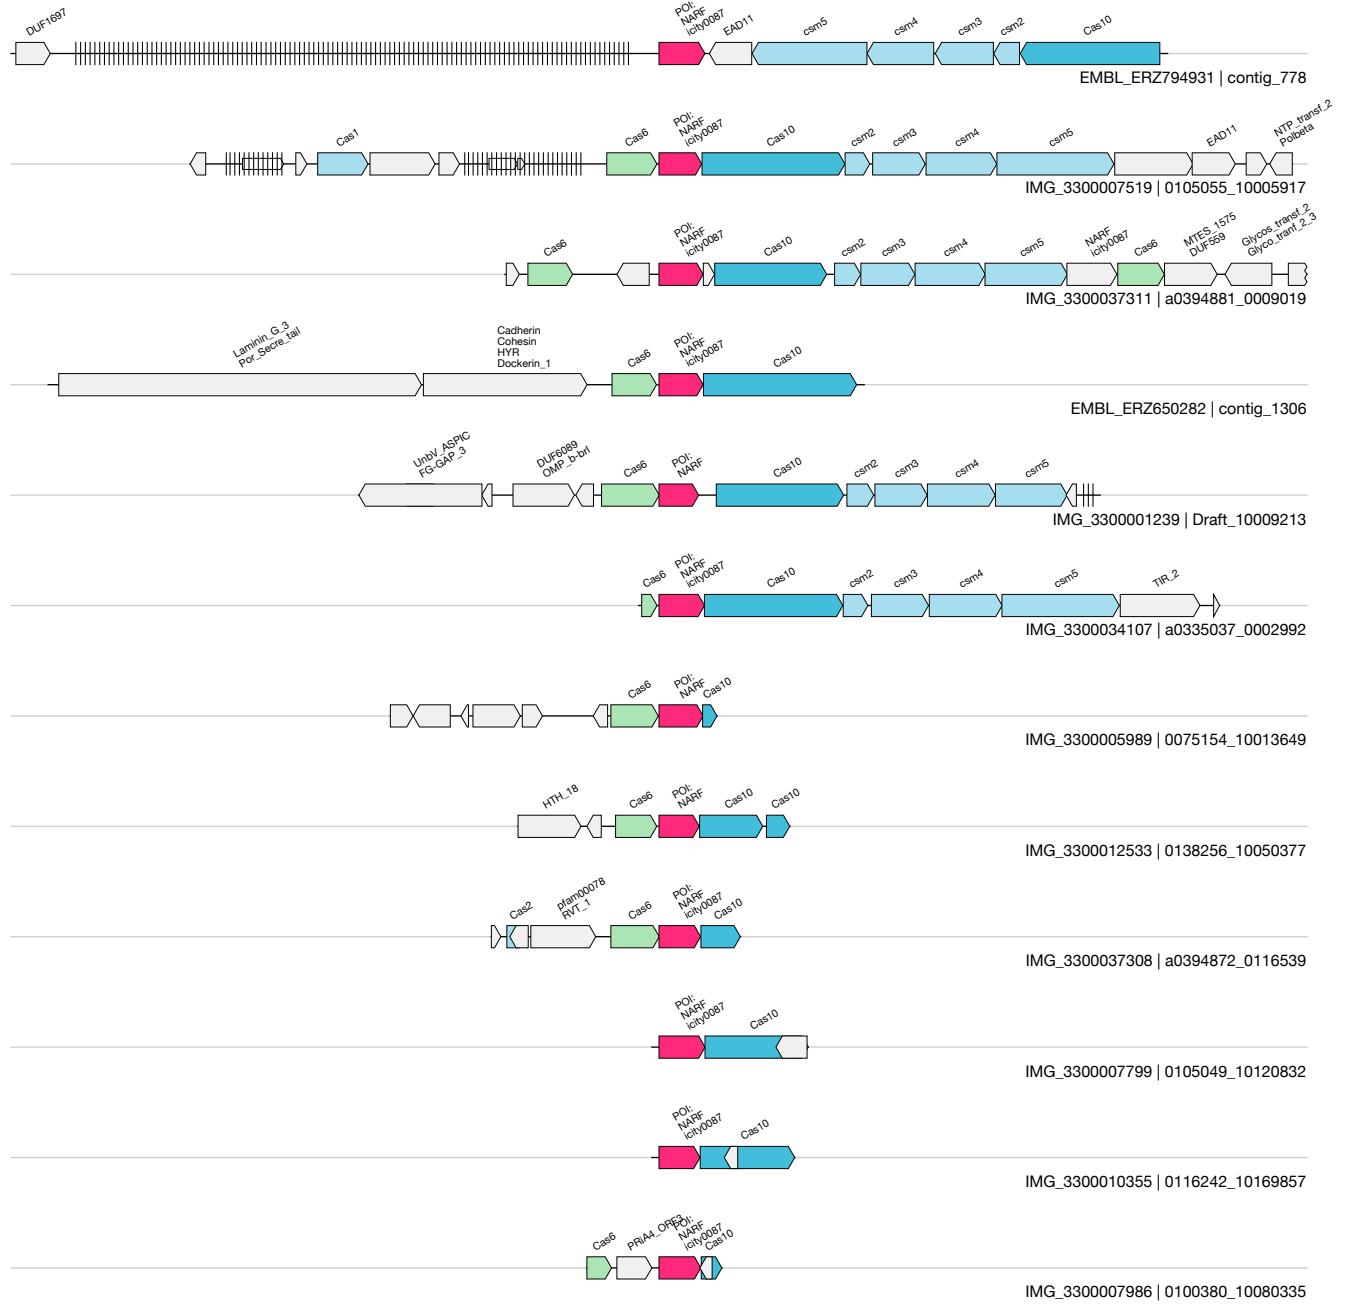

1kb

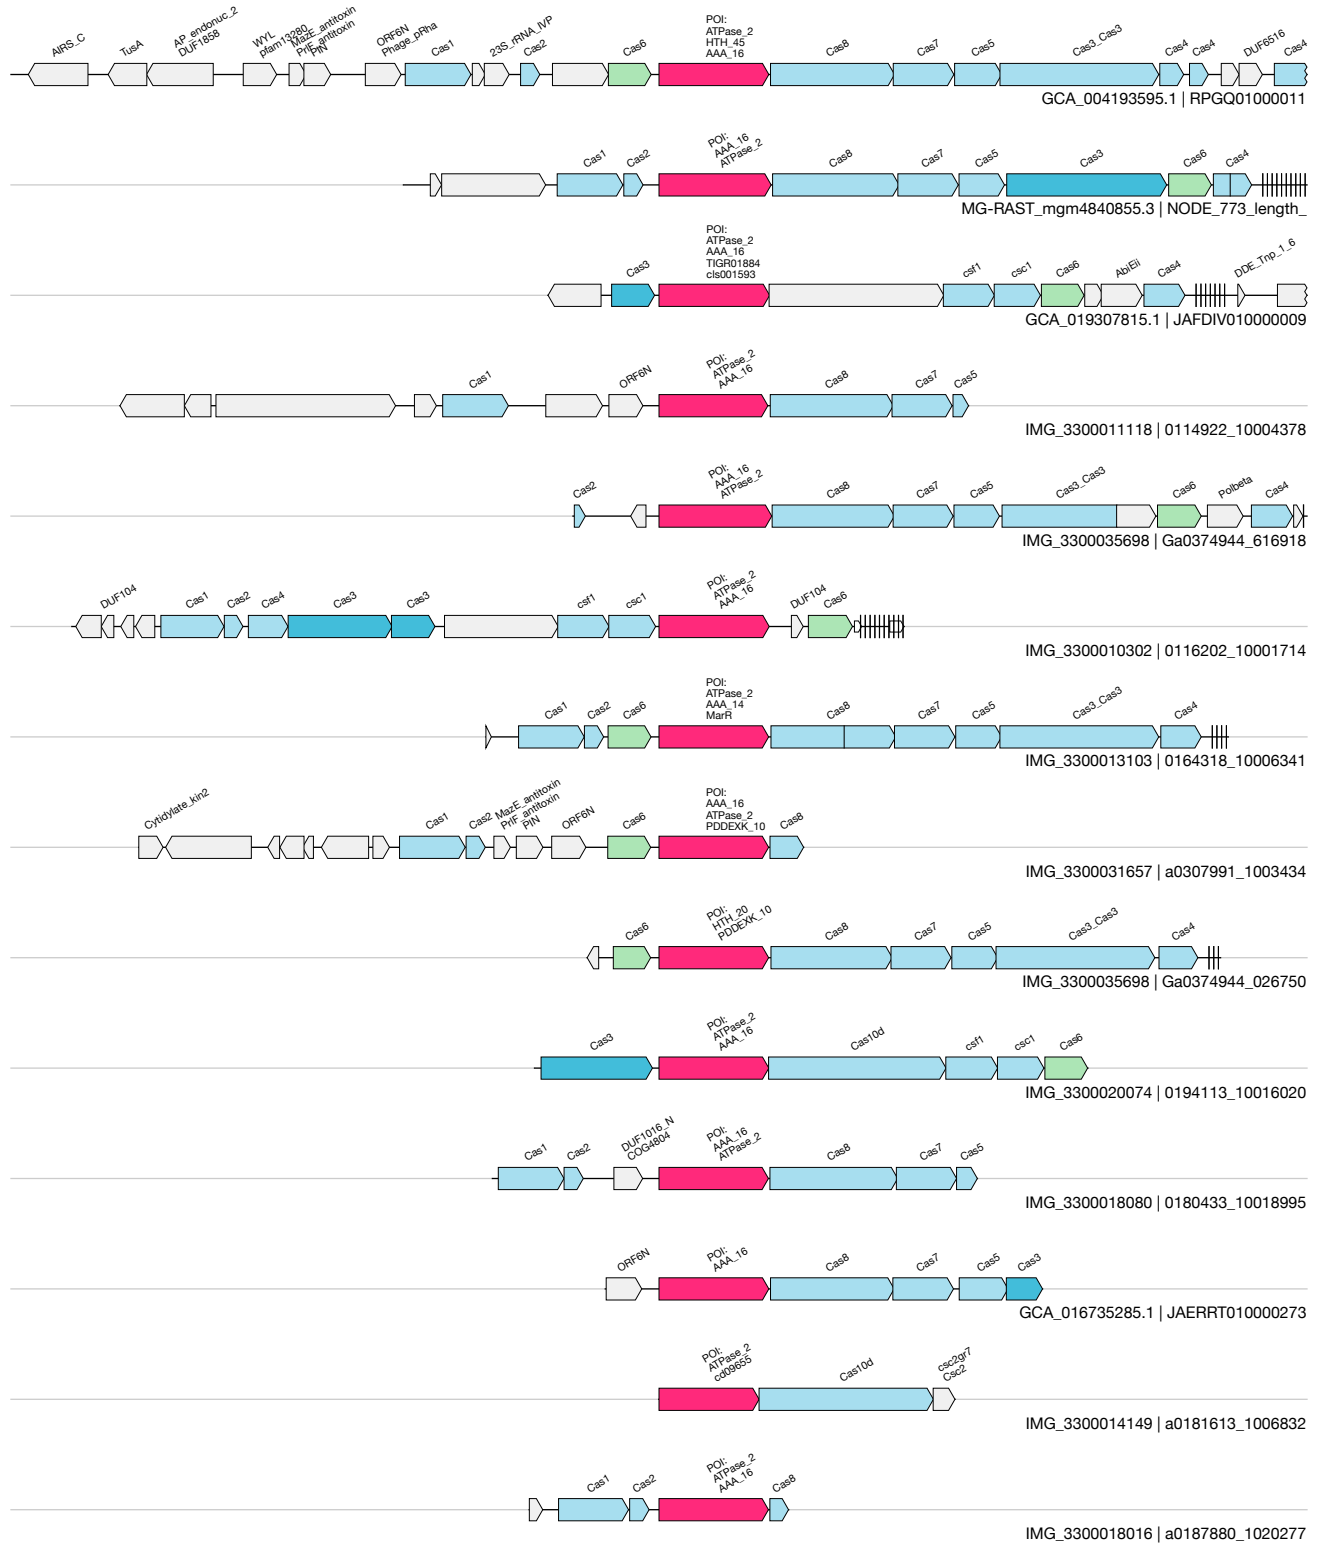

# EX

**UAS-146**  
Auxiliary

**(EAD11)**

5 / 8.2

IMG\_3300037311&&a0394881\_0008304&&11617\_12277\_1

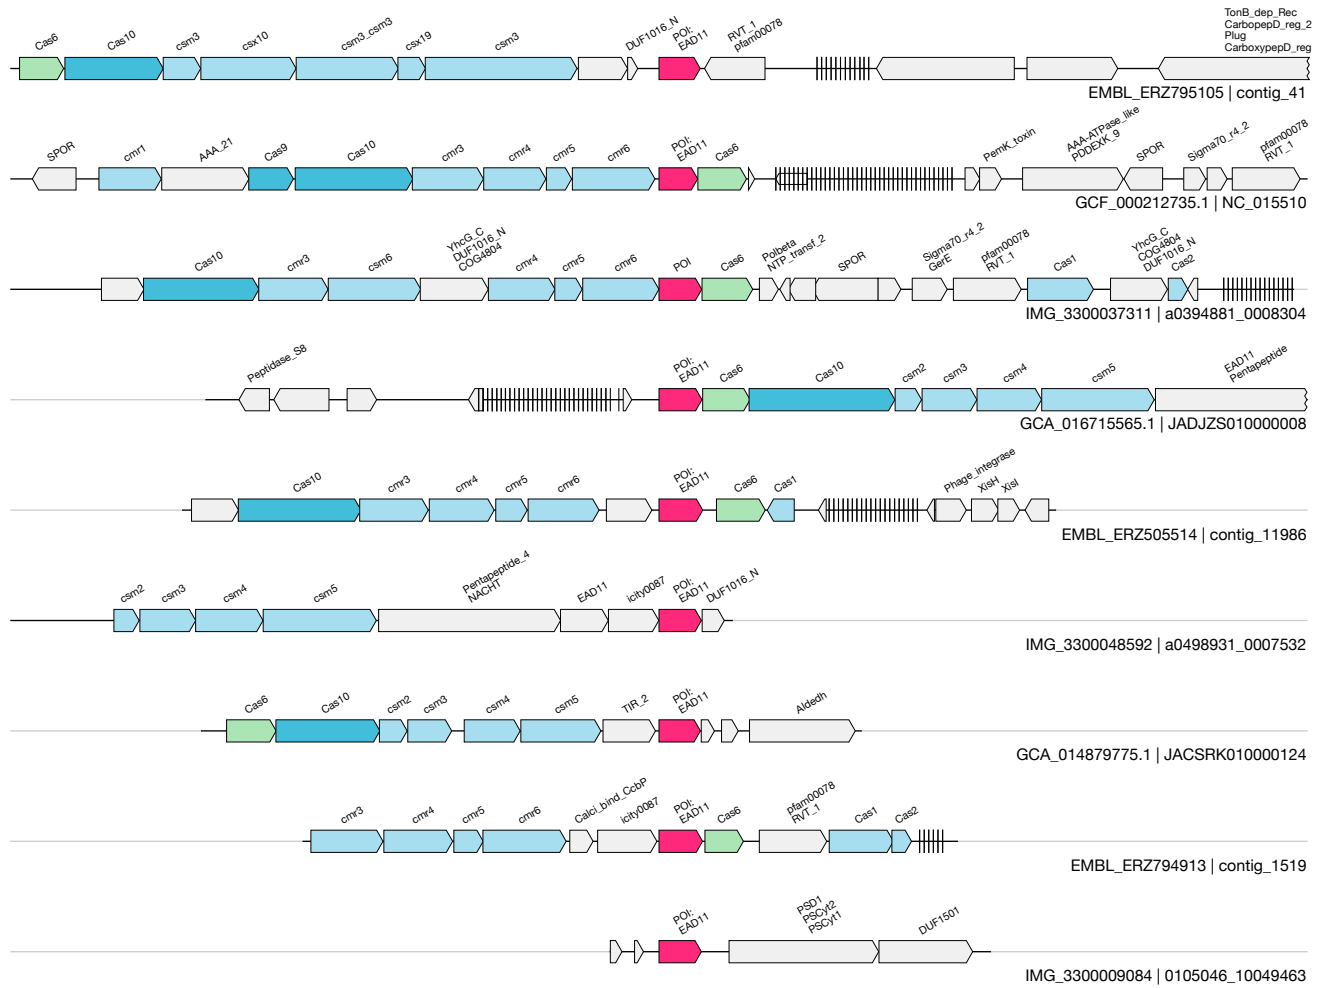

1kb



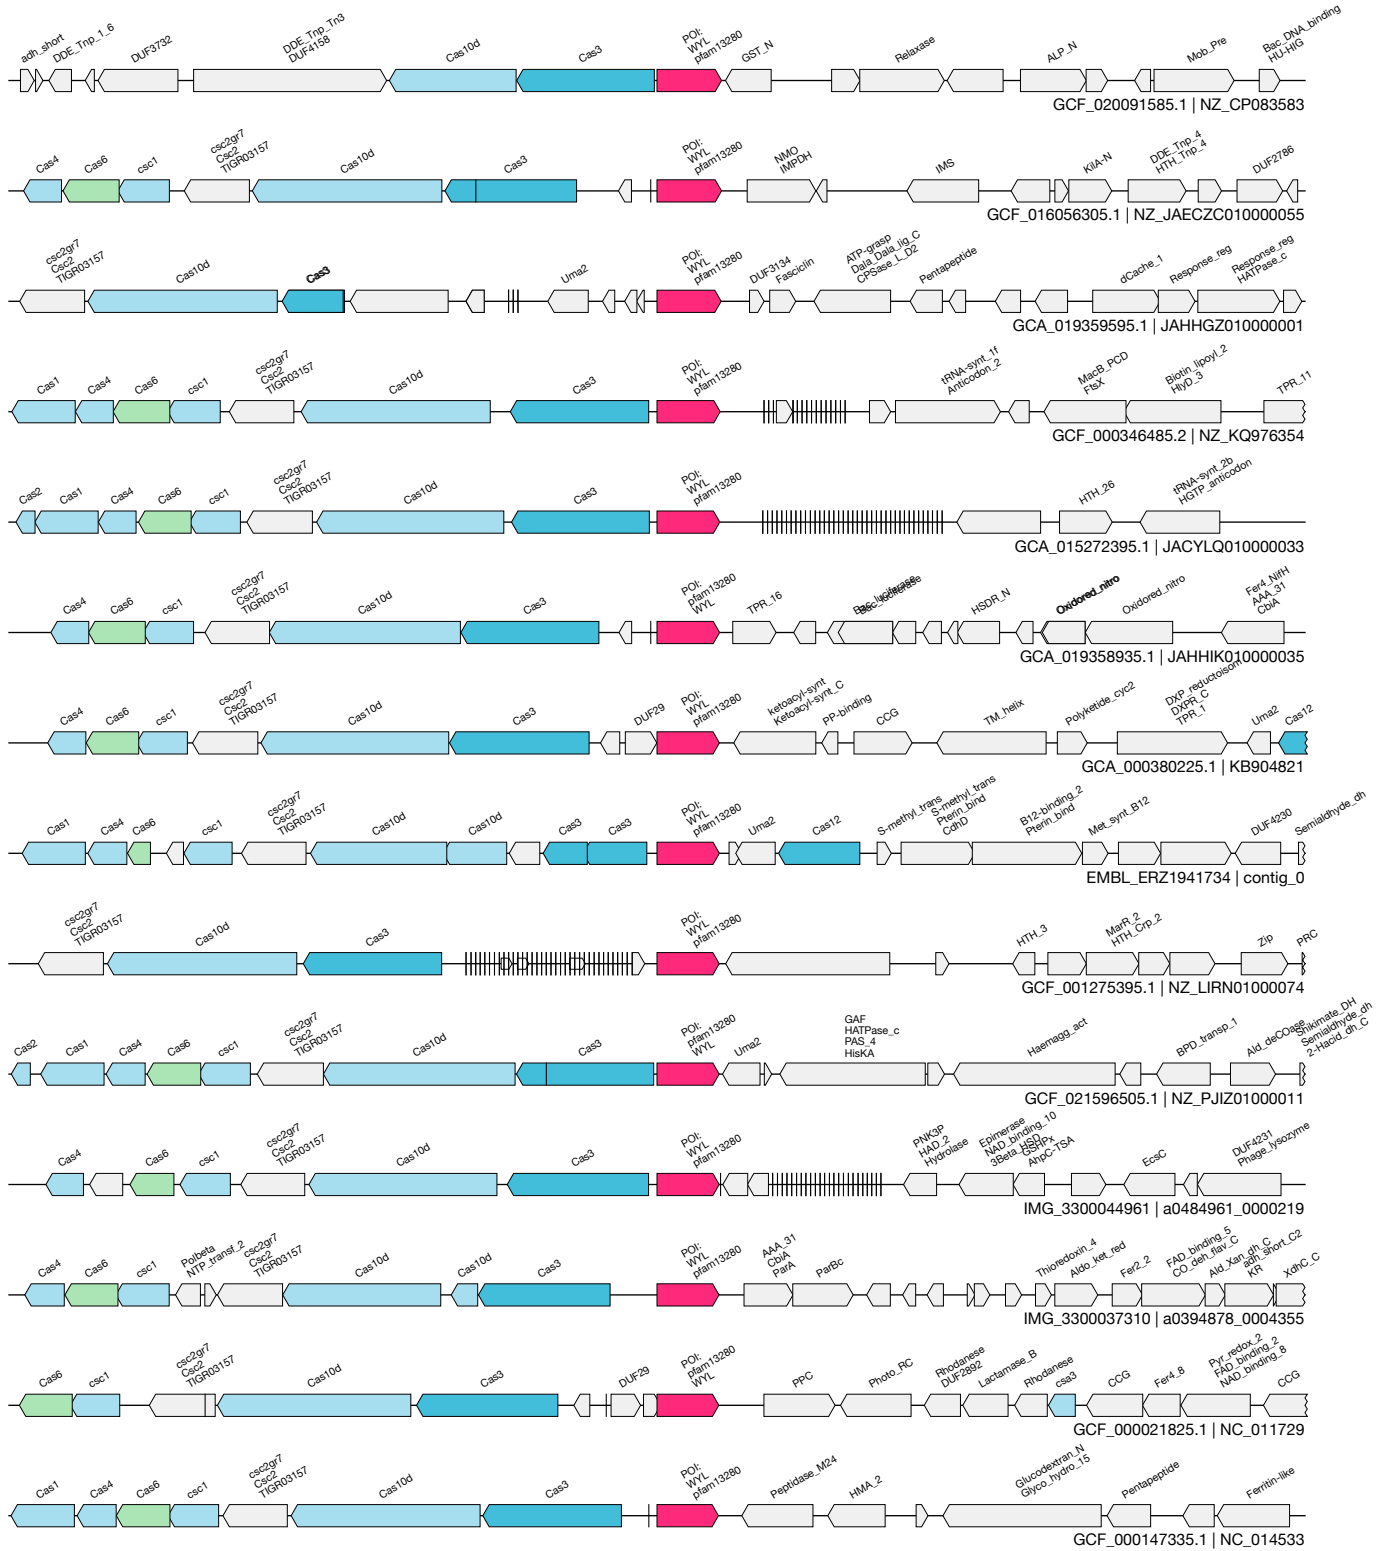

1kb

EZ

**UAS-27**  
Auxiliary

**(methyltransferase + cascade)**  
IMG\_3300041417&&a0439242\_0072051&&1423\_2242\_1

2 / 3.2

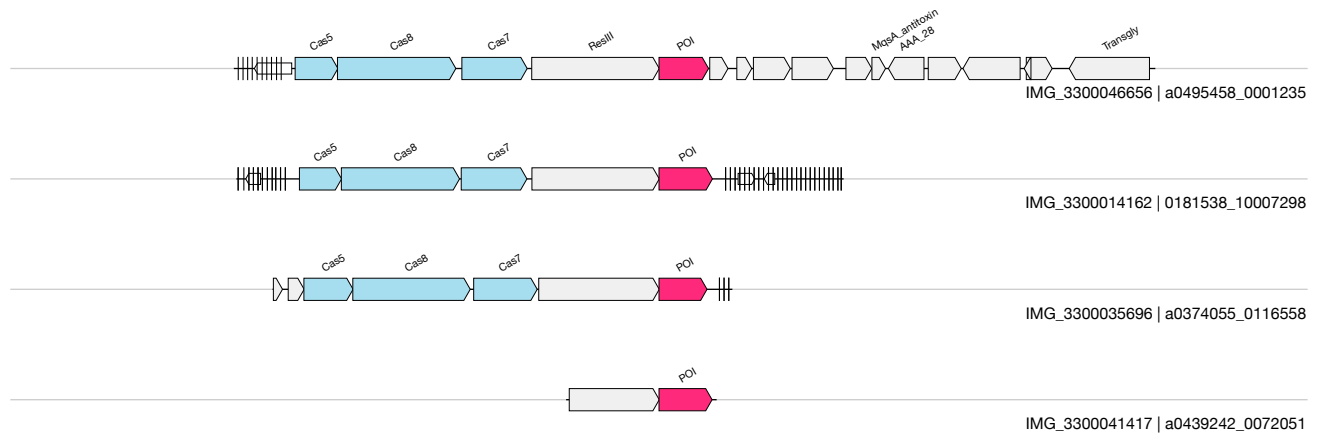

1kb

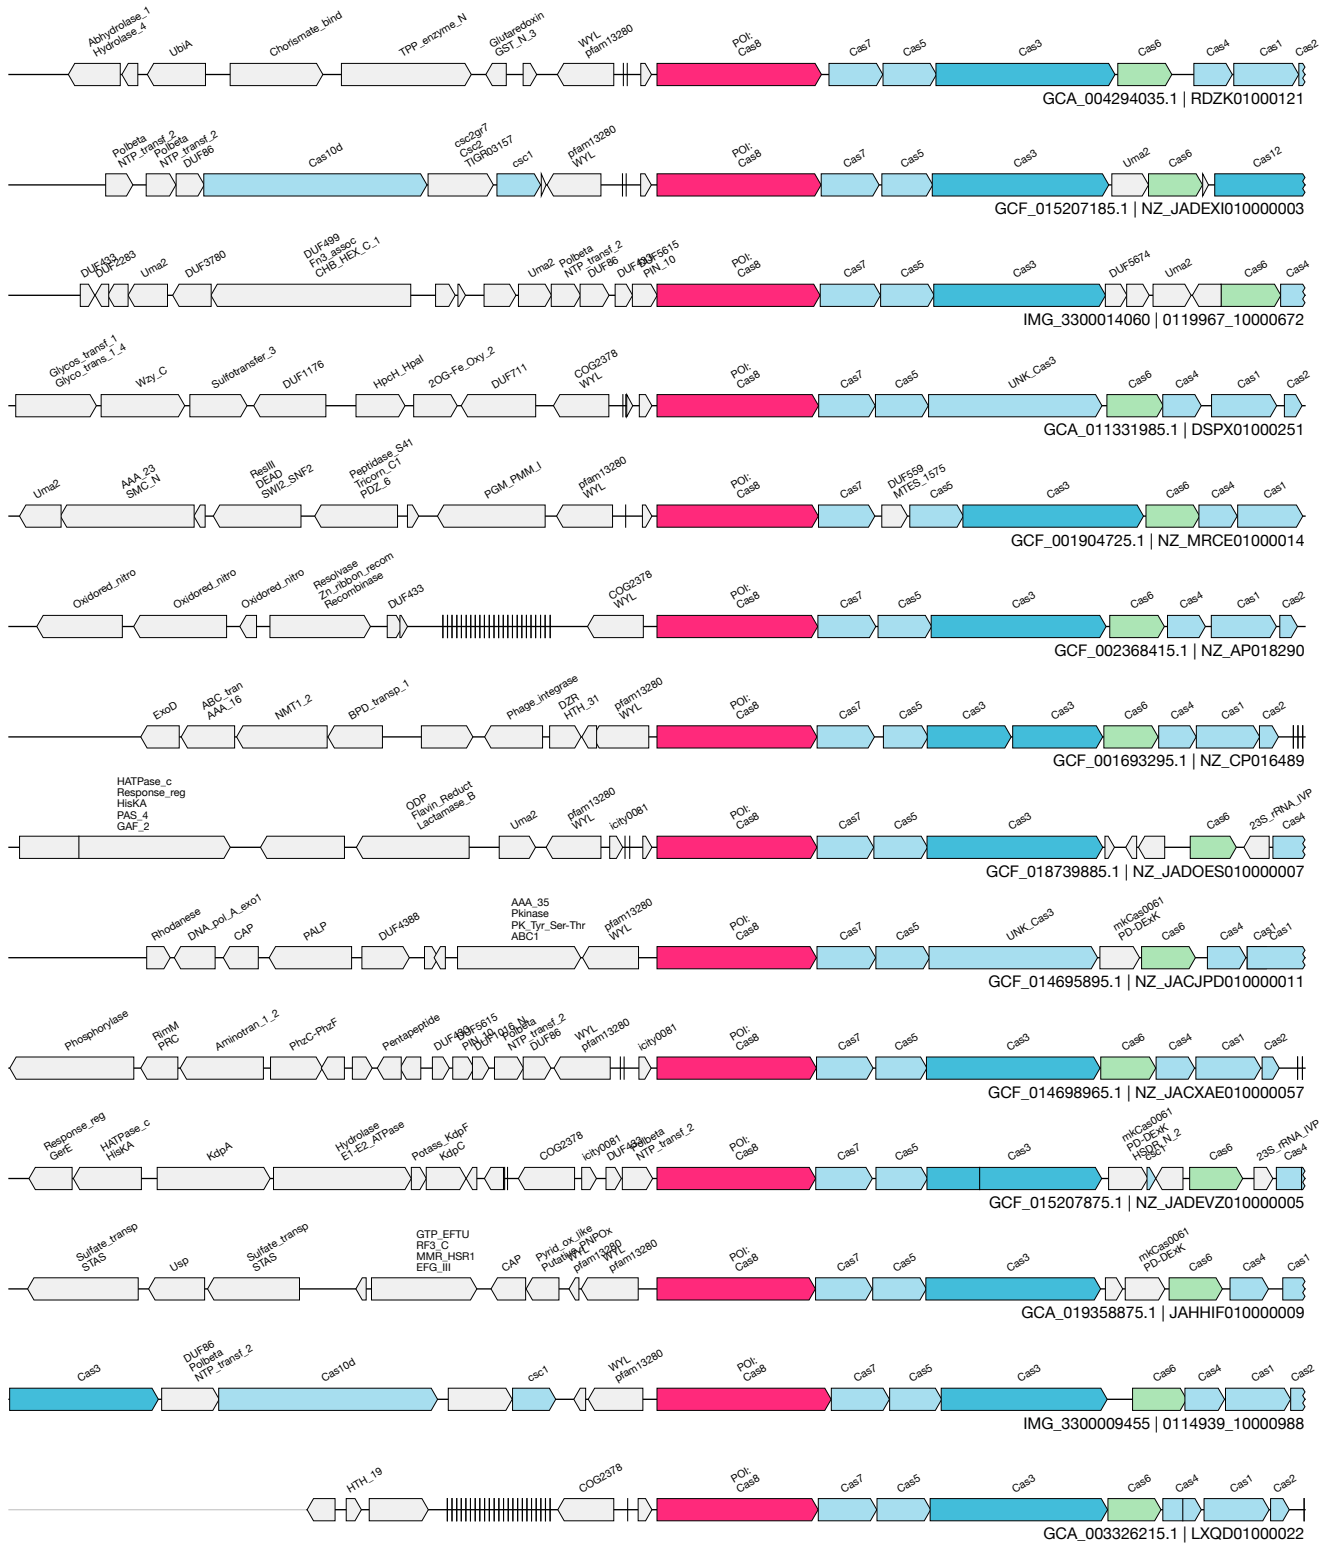

1kb

FB

UAS-149  
Auxiliary

(vWA + Tubulin)

N/A

IMG\_3300043390&&Ga0454692\_000076&&4479\_7614\_1

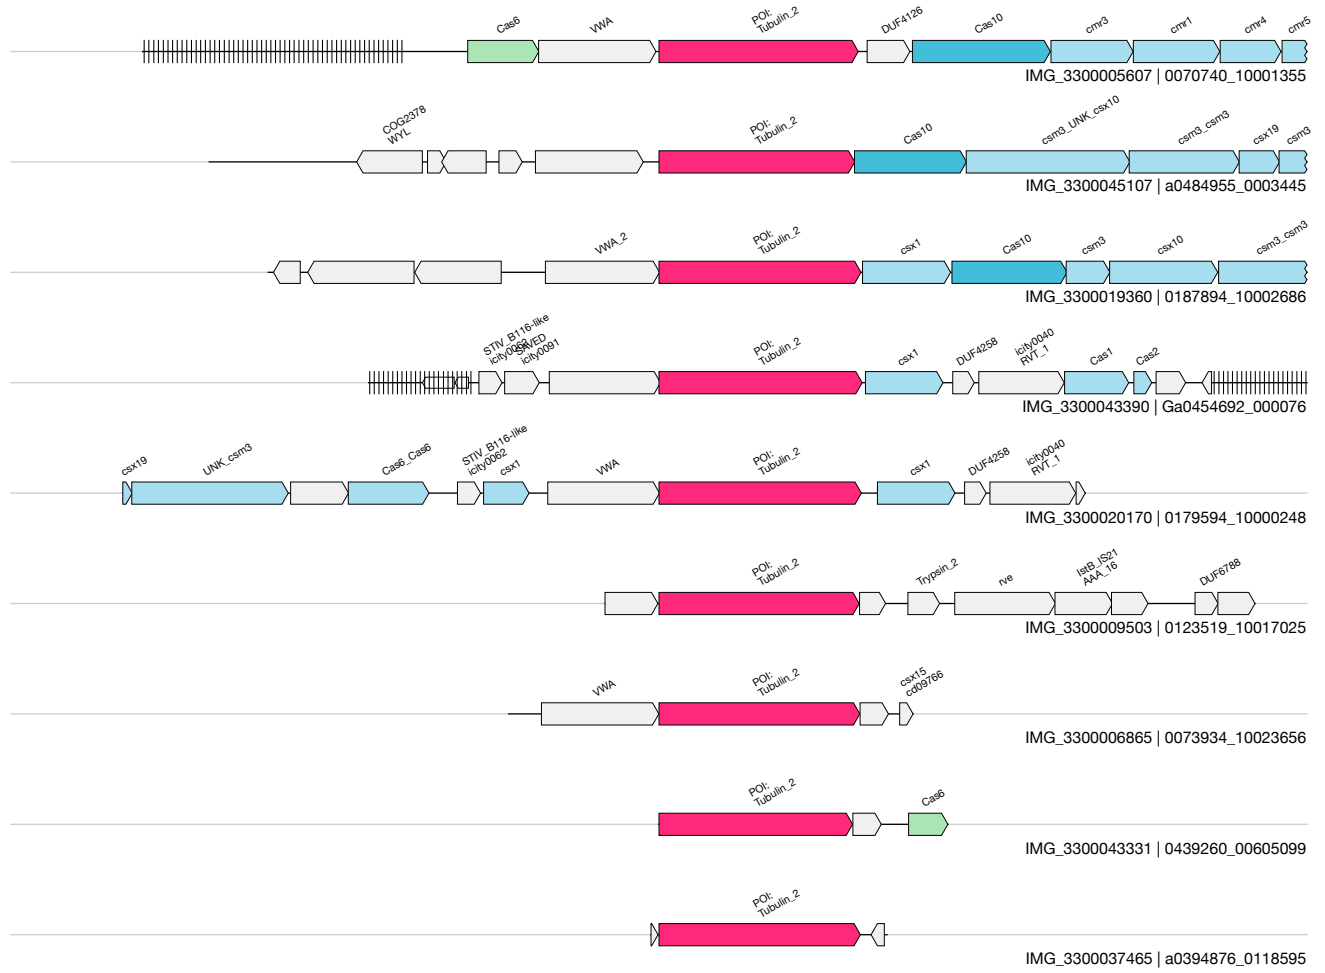

1kb

FC

**UAS-150**  
Auxiliary

**(APH\_EcKinase)**  
IMG\_3300044730&&a0453757\_0004423&&6344\_8234\_-1

3 / 3.0

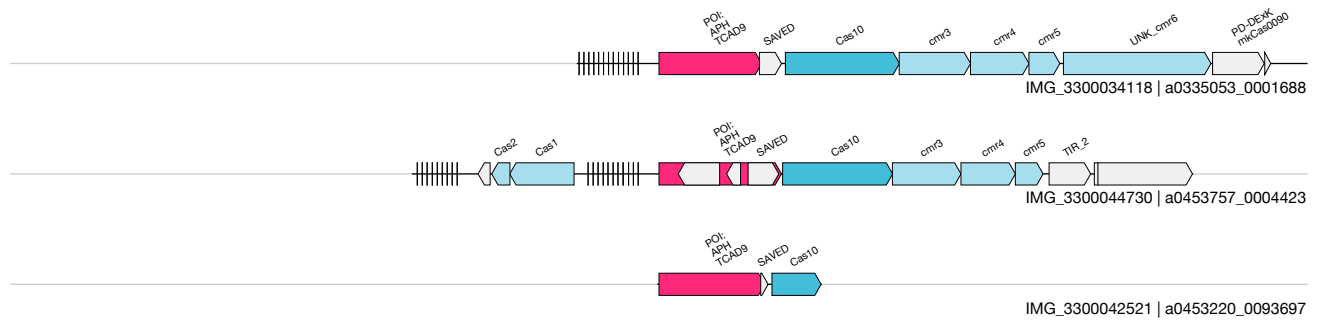

1kb

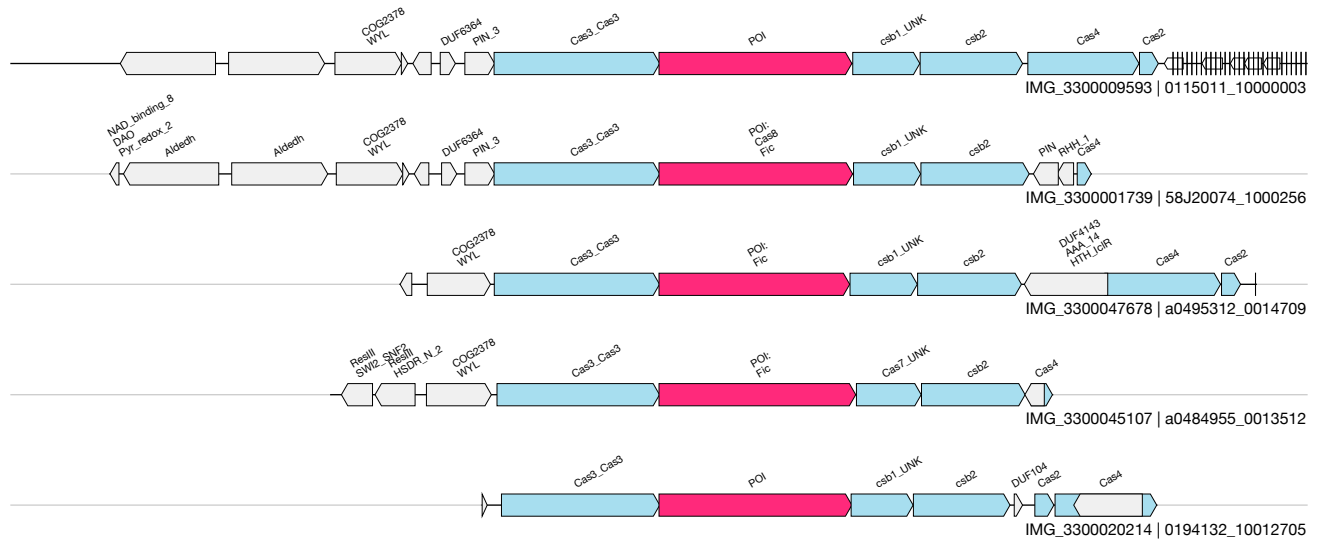

1kb

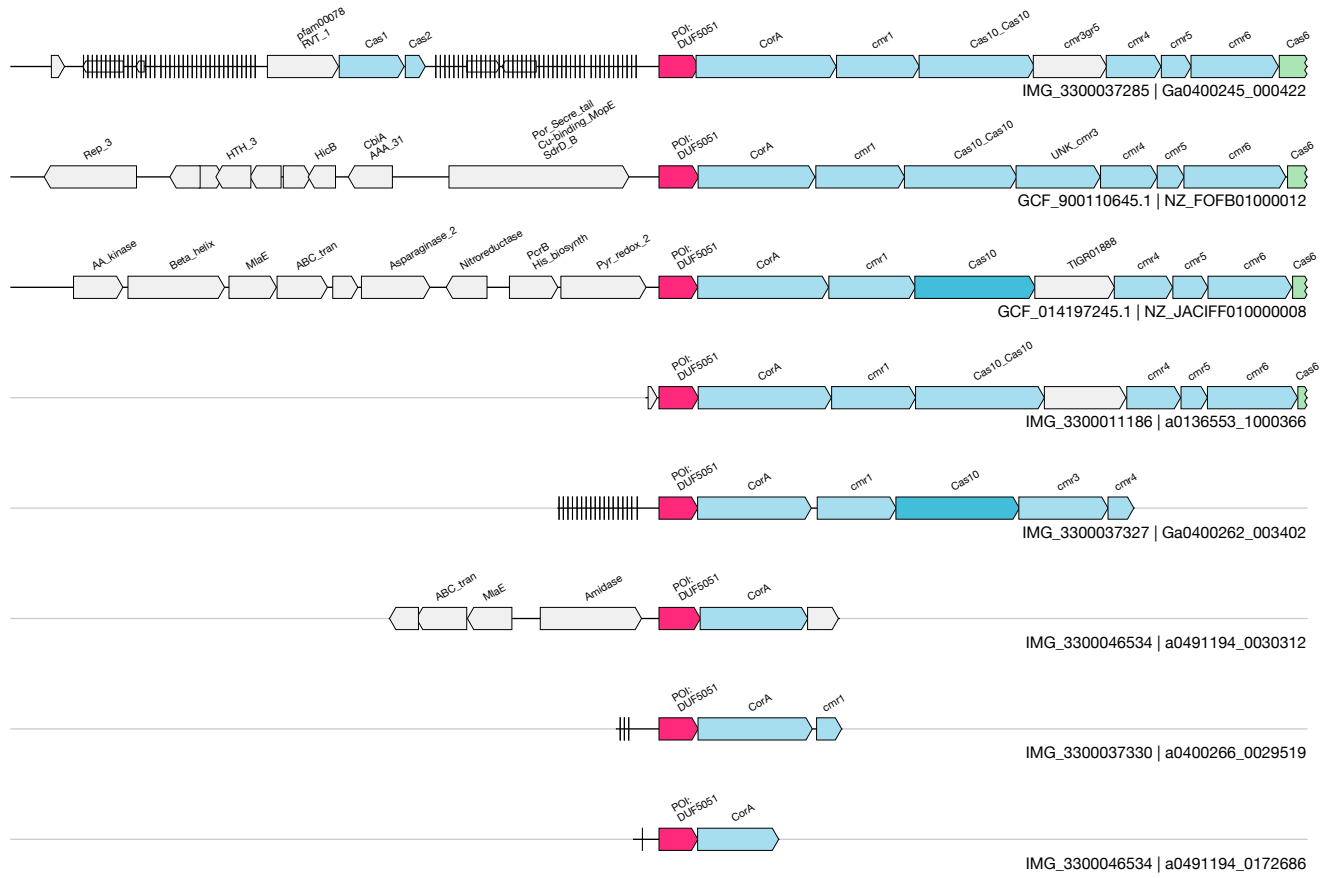

1kb

FF

UAS-153  
Auxiliary

(SNF2 instead of Cas3)  
IMG\_3300047317&a0495604\_0021803&&2293\_4057\_-1

7 / 9.9

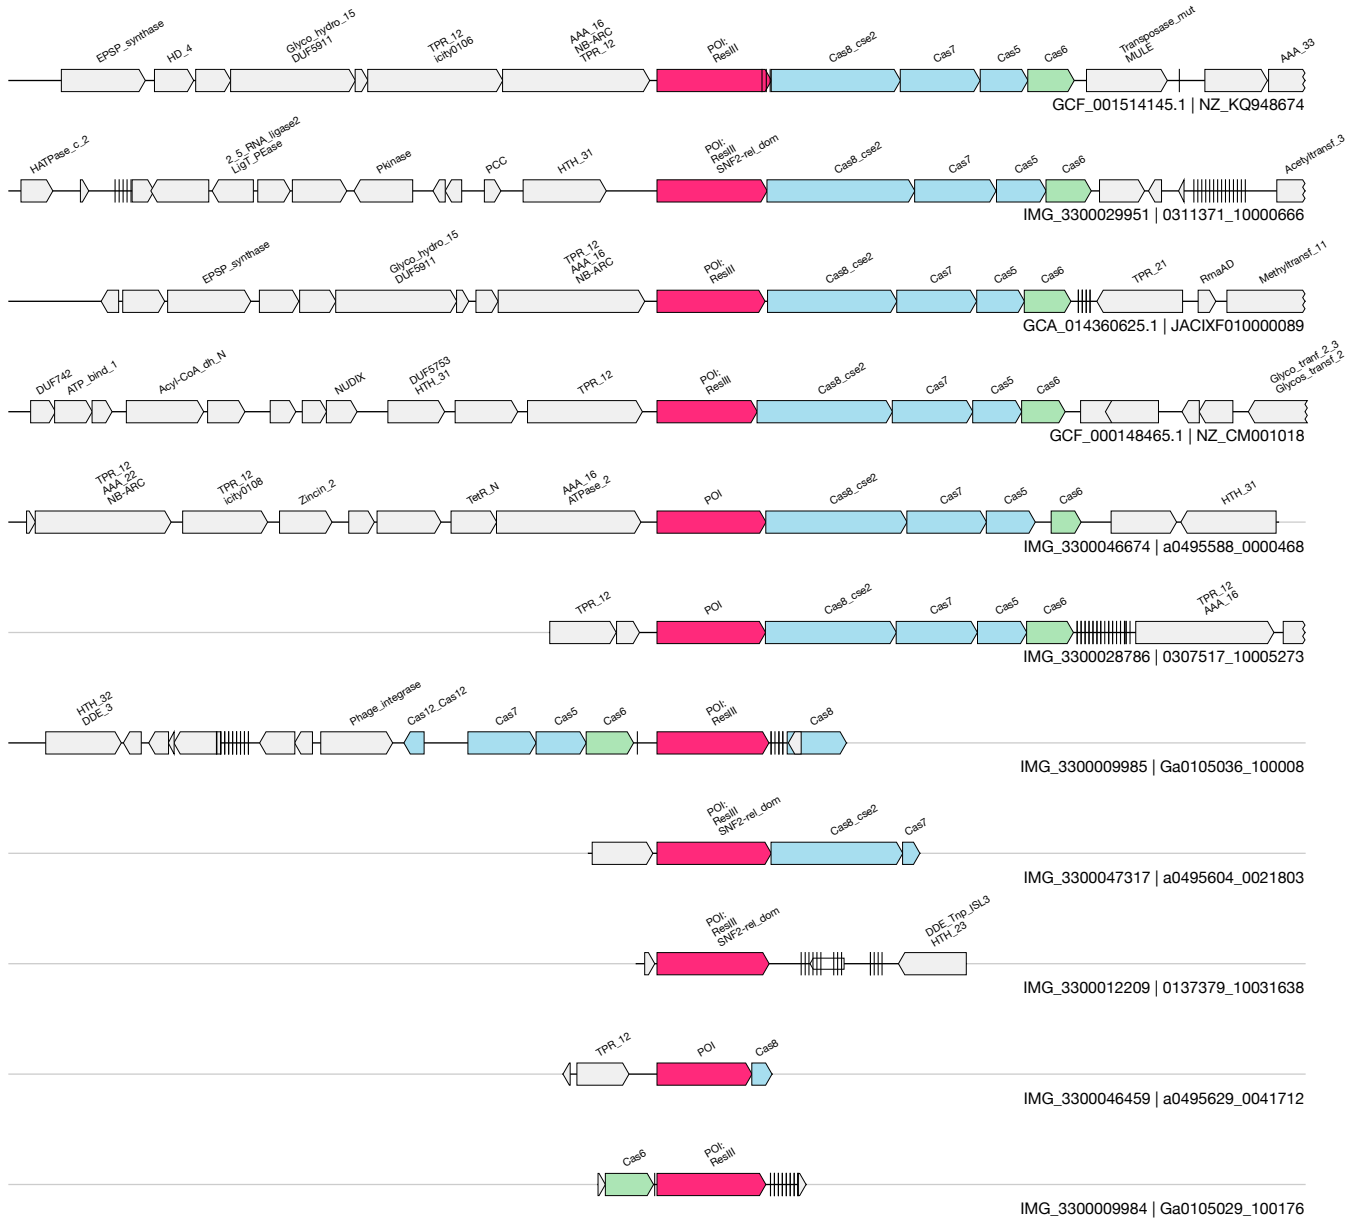

1kb



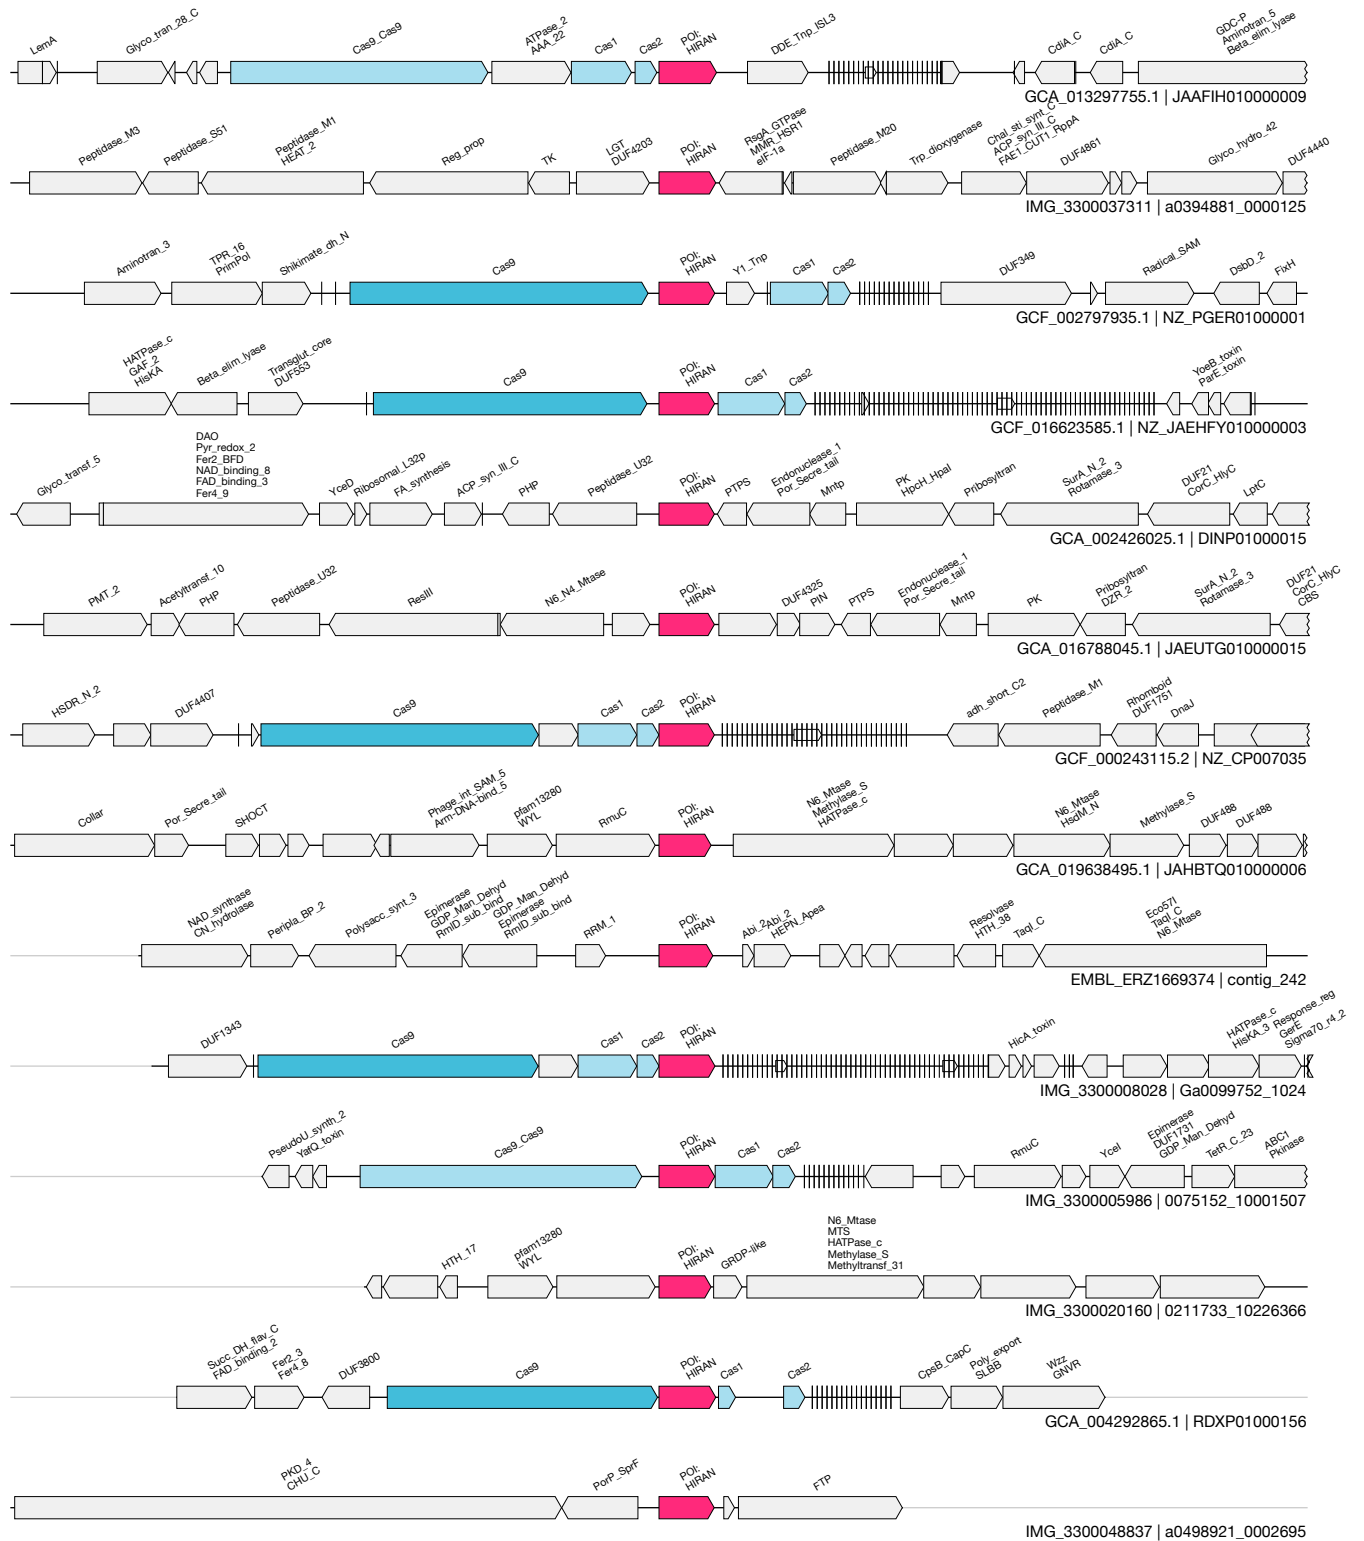

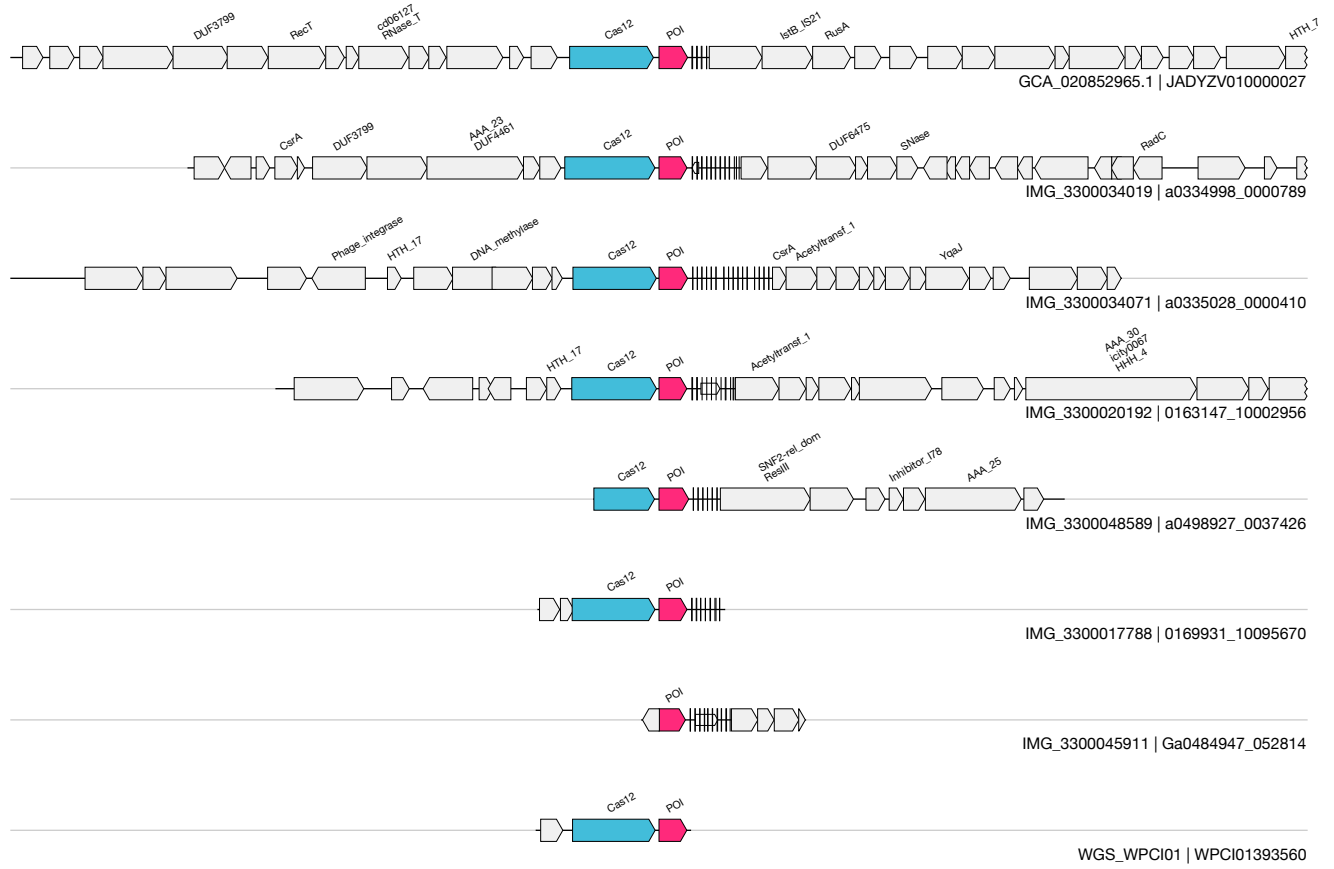

1kb

FI

**UAS-155**  
Auxiliary

**(transmembrane\_vWA + DUF4407)**  
IMG\_3300048987&&a0467049\_0000162&&19133\_19934\_1

3 / 4.4

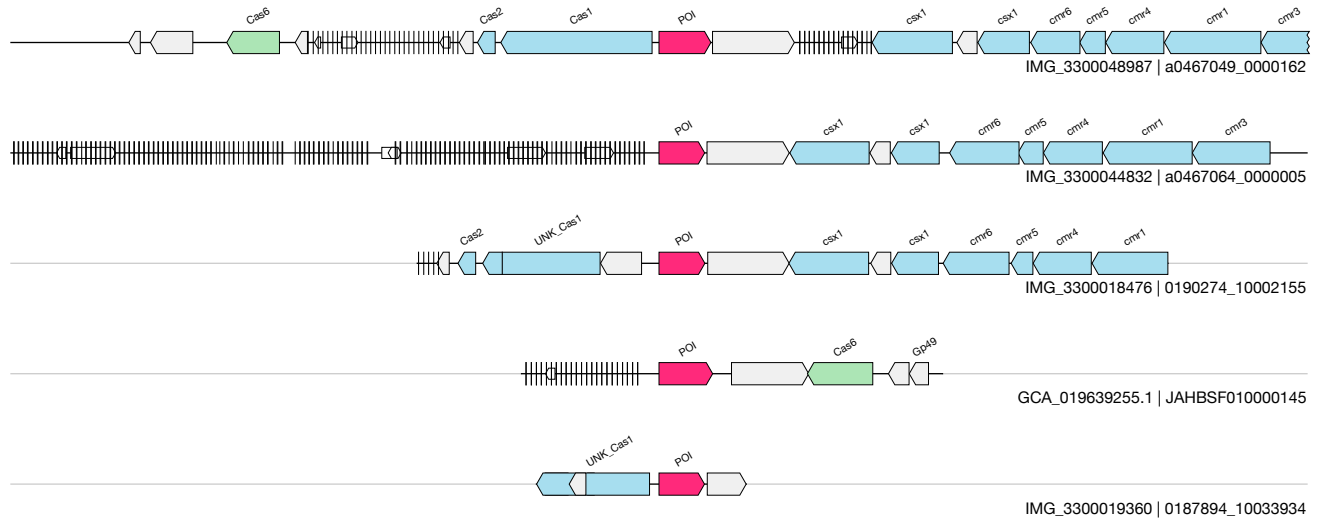

1kb

FJ

**UAS-156**  
Auxiliary

**(Mrr nuclease + ATPase)**  
WGS\_CADHRT01&&CADHRT010000022&&25862\_26885\_1

N/A

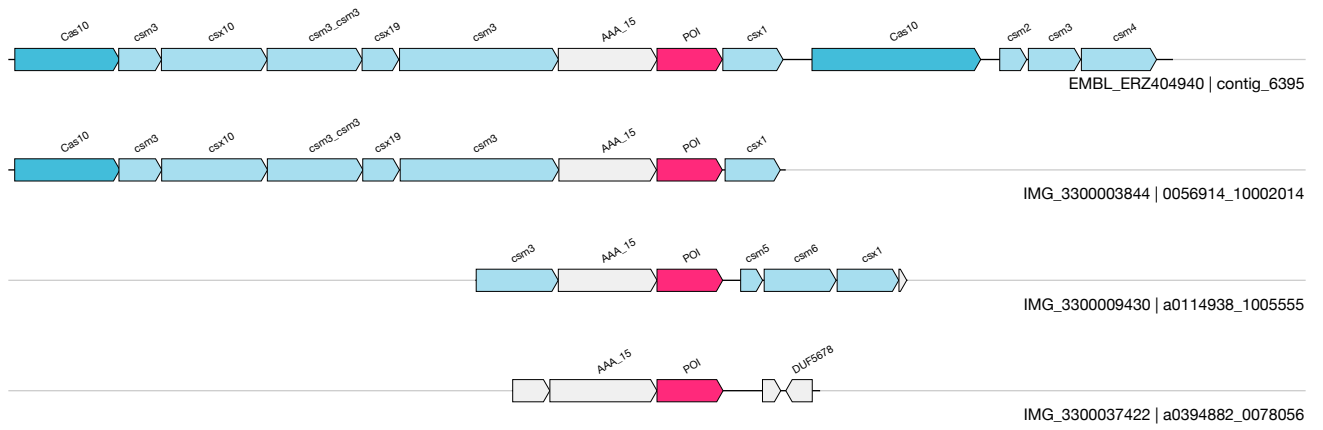

1kb

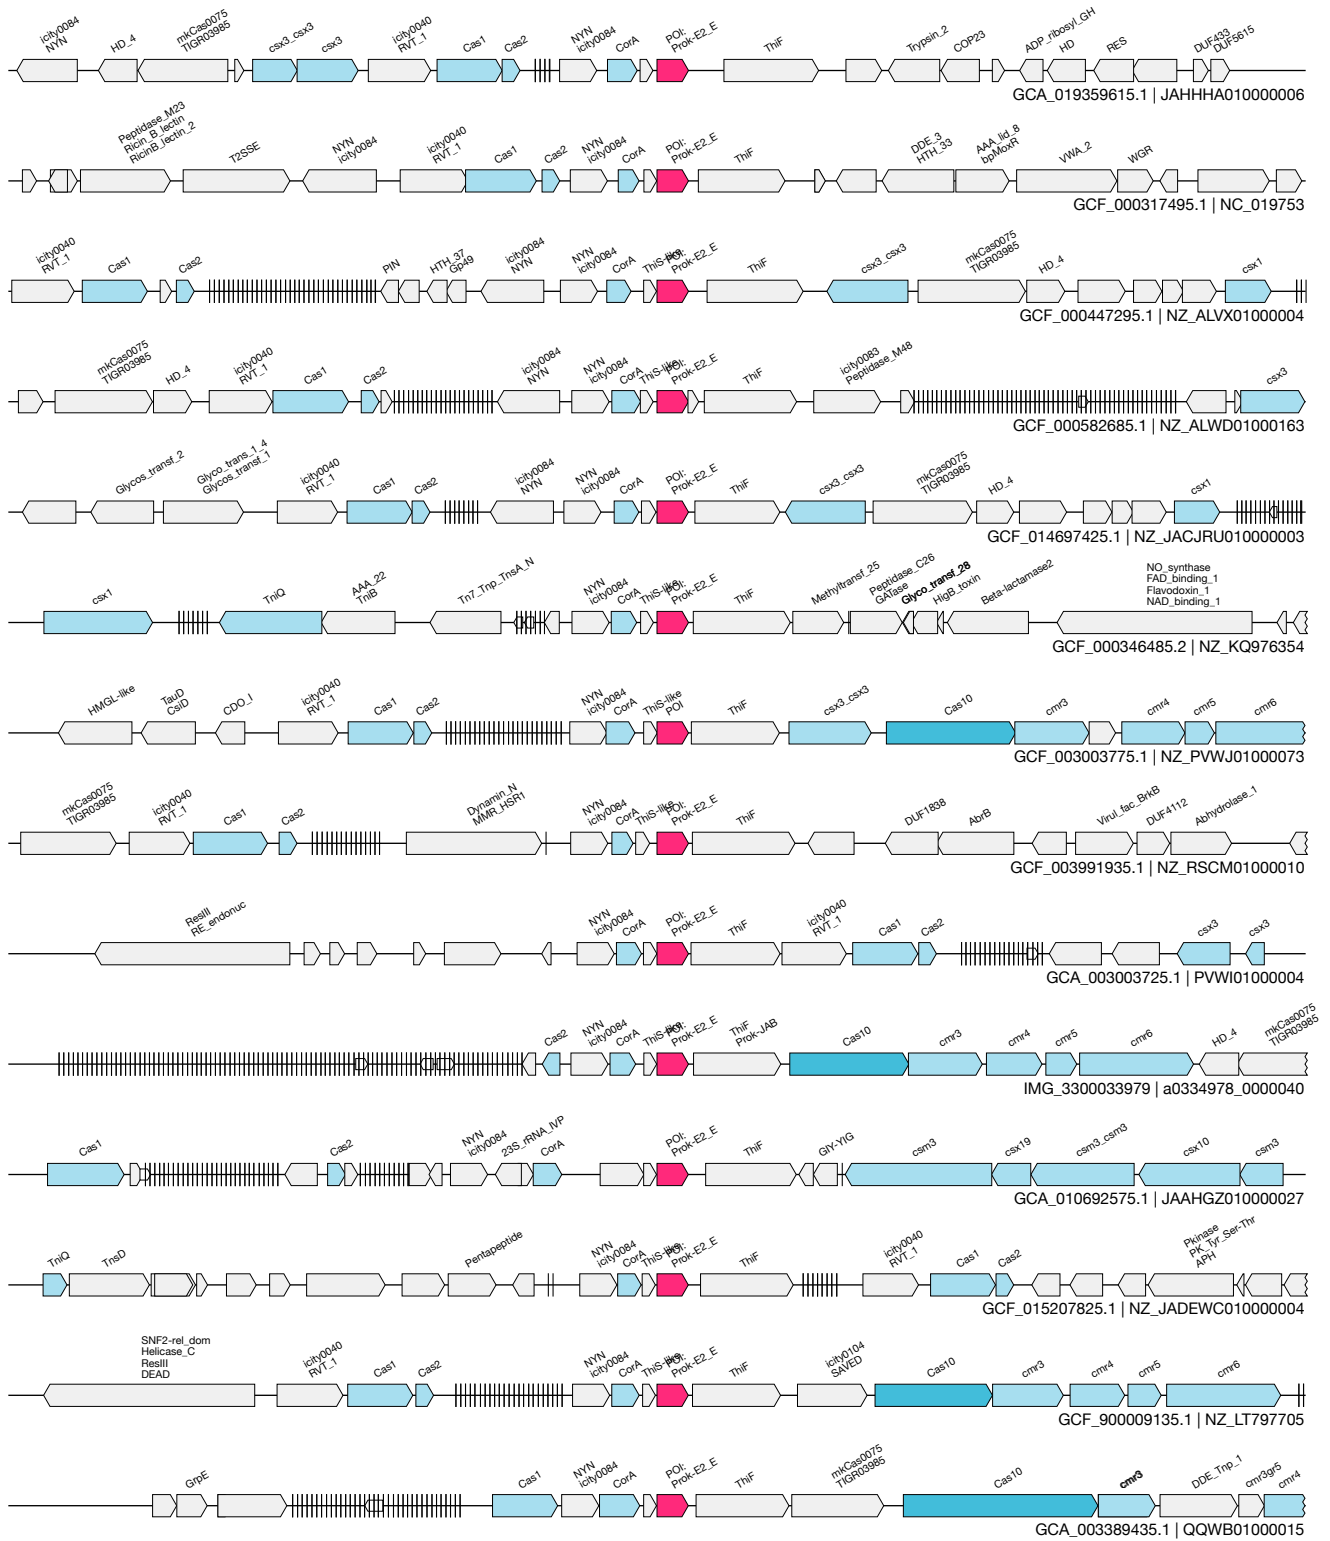

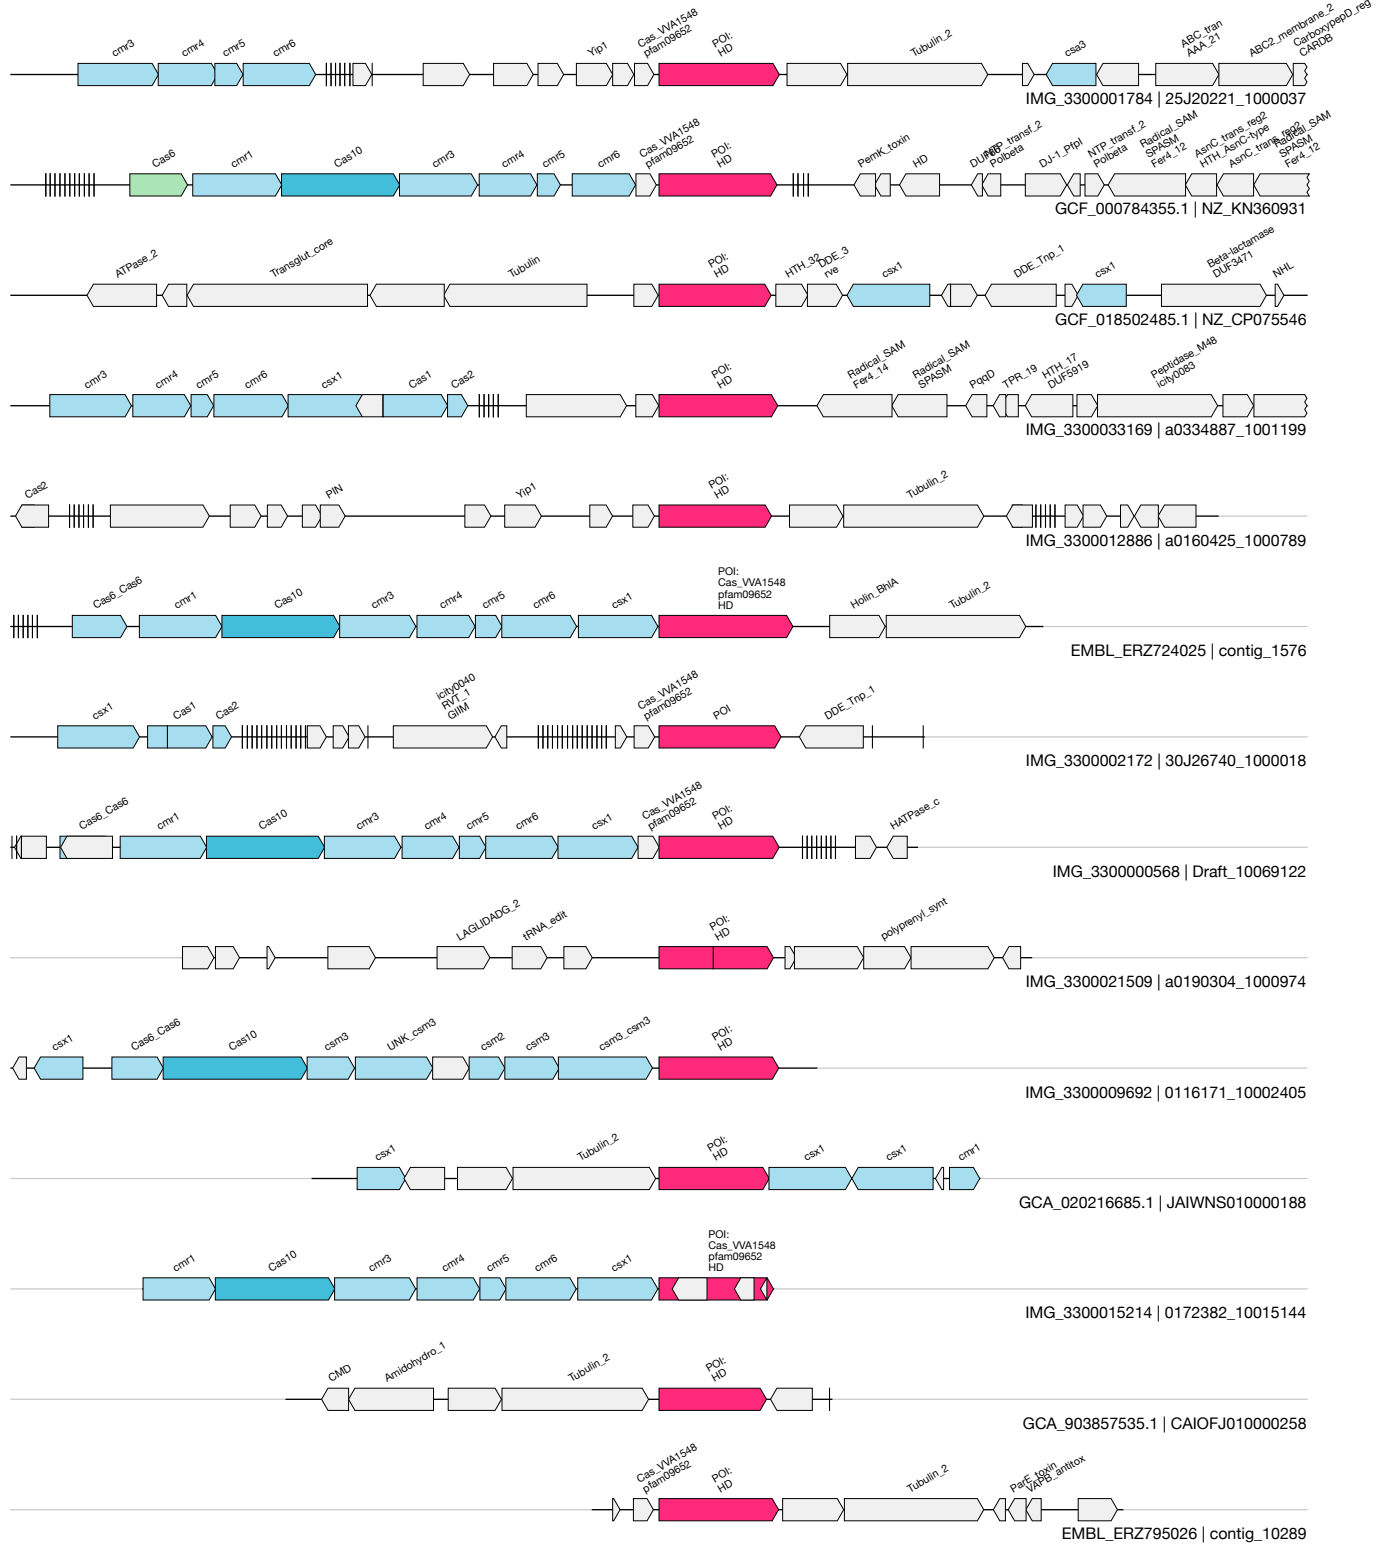

1kb

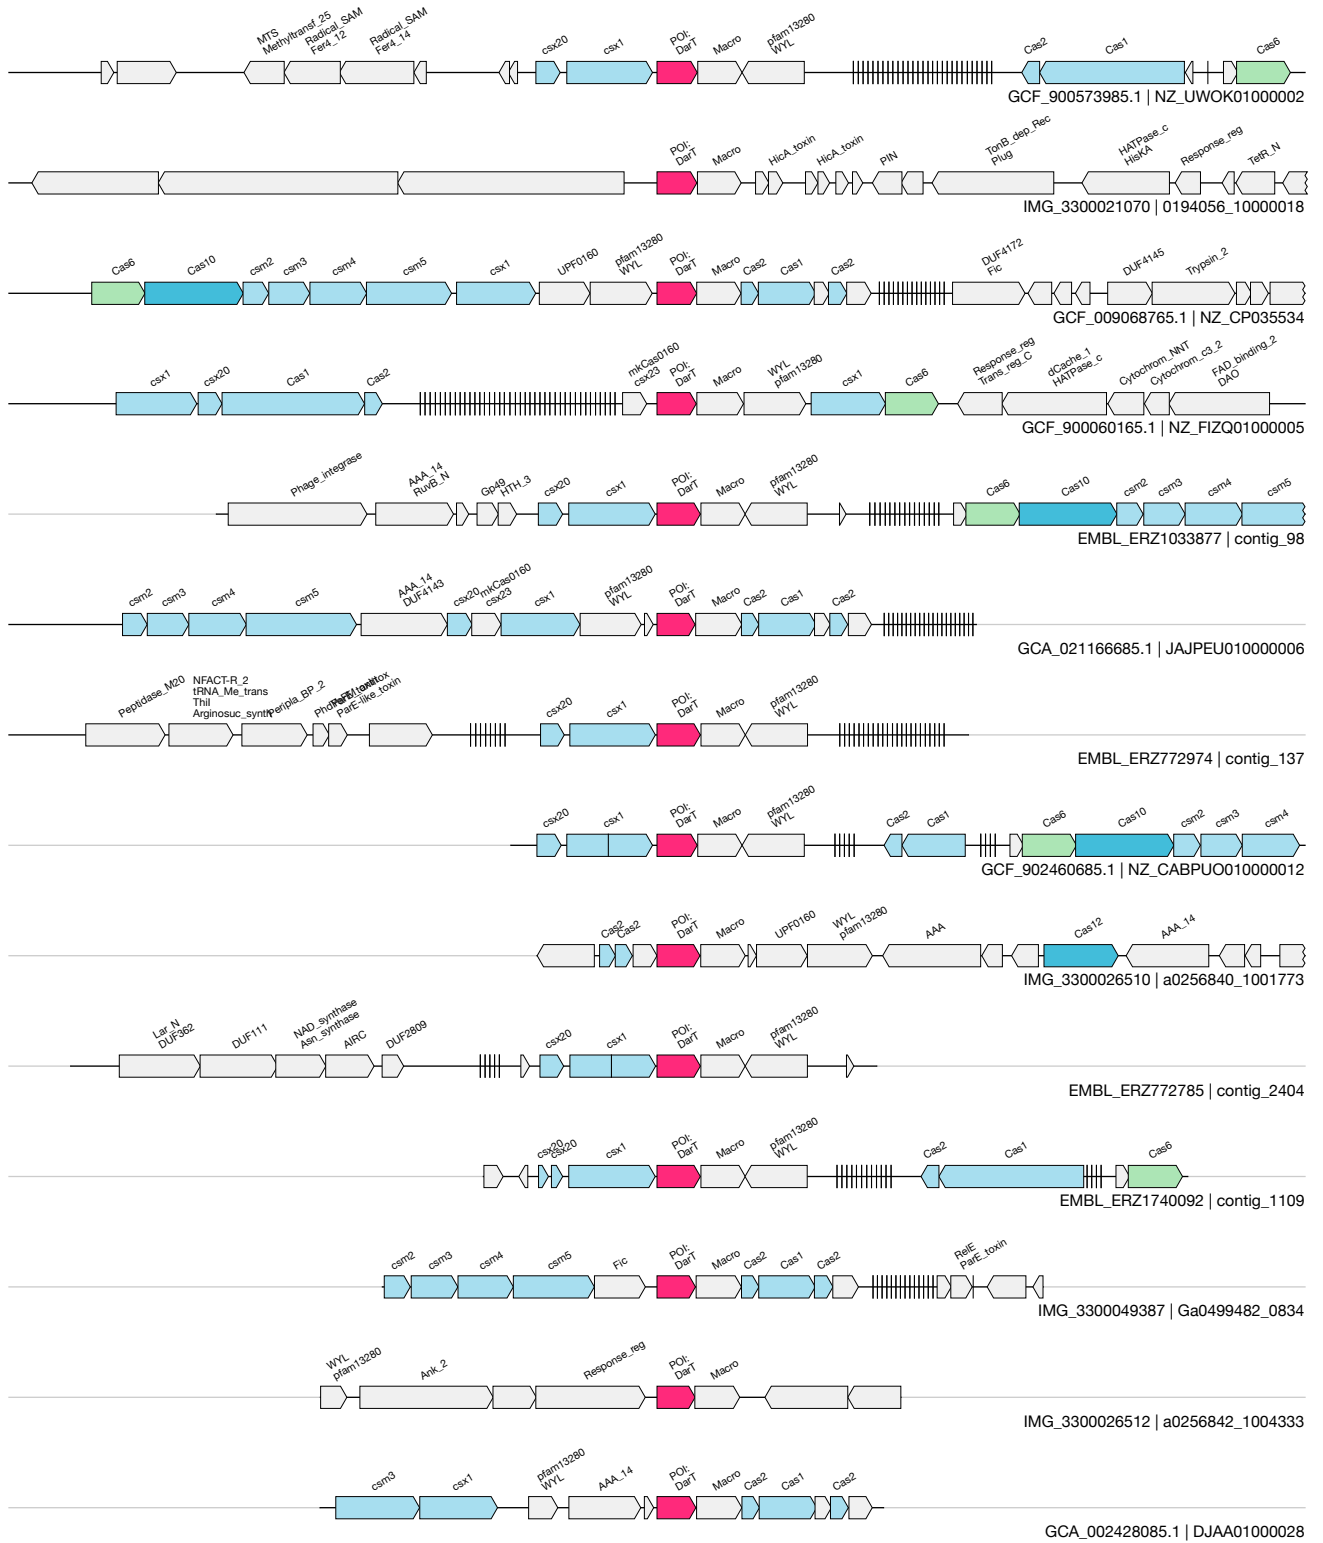

1kb

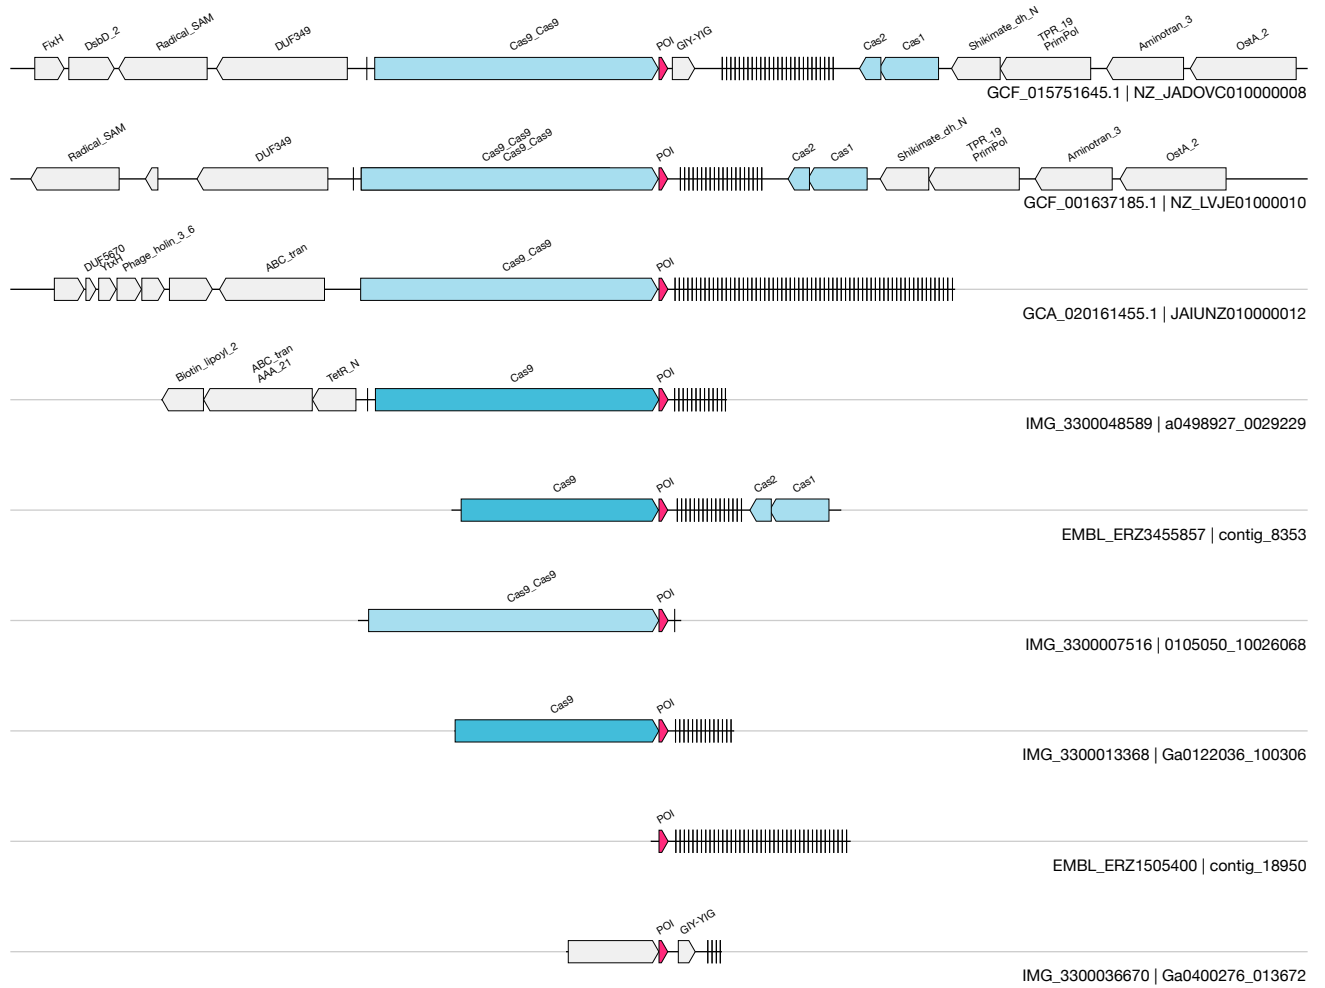

1kb



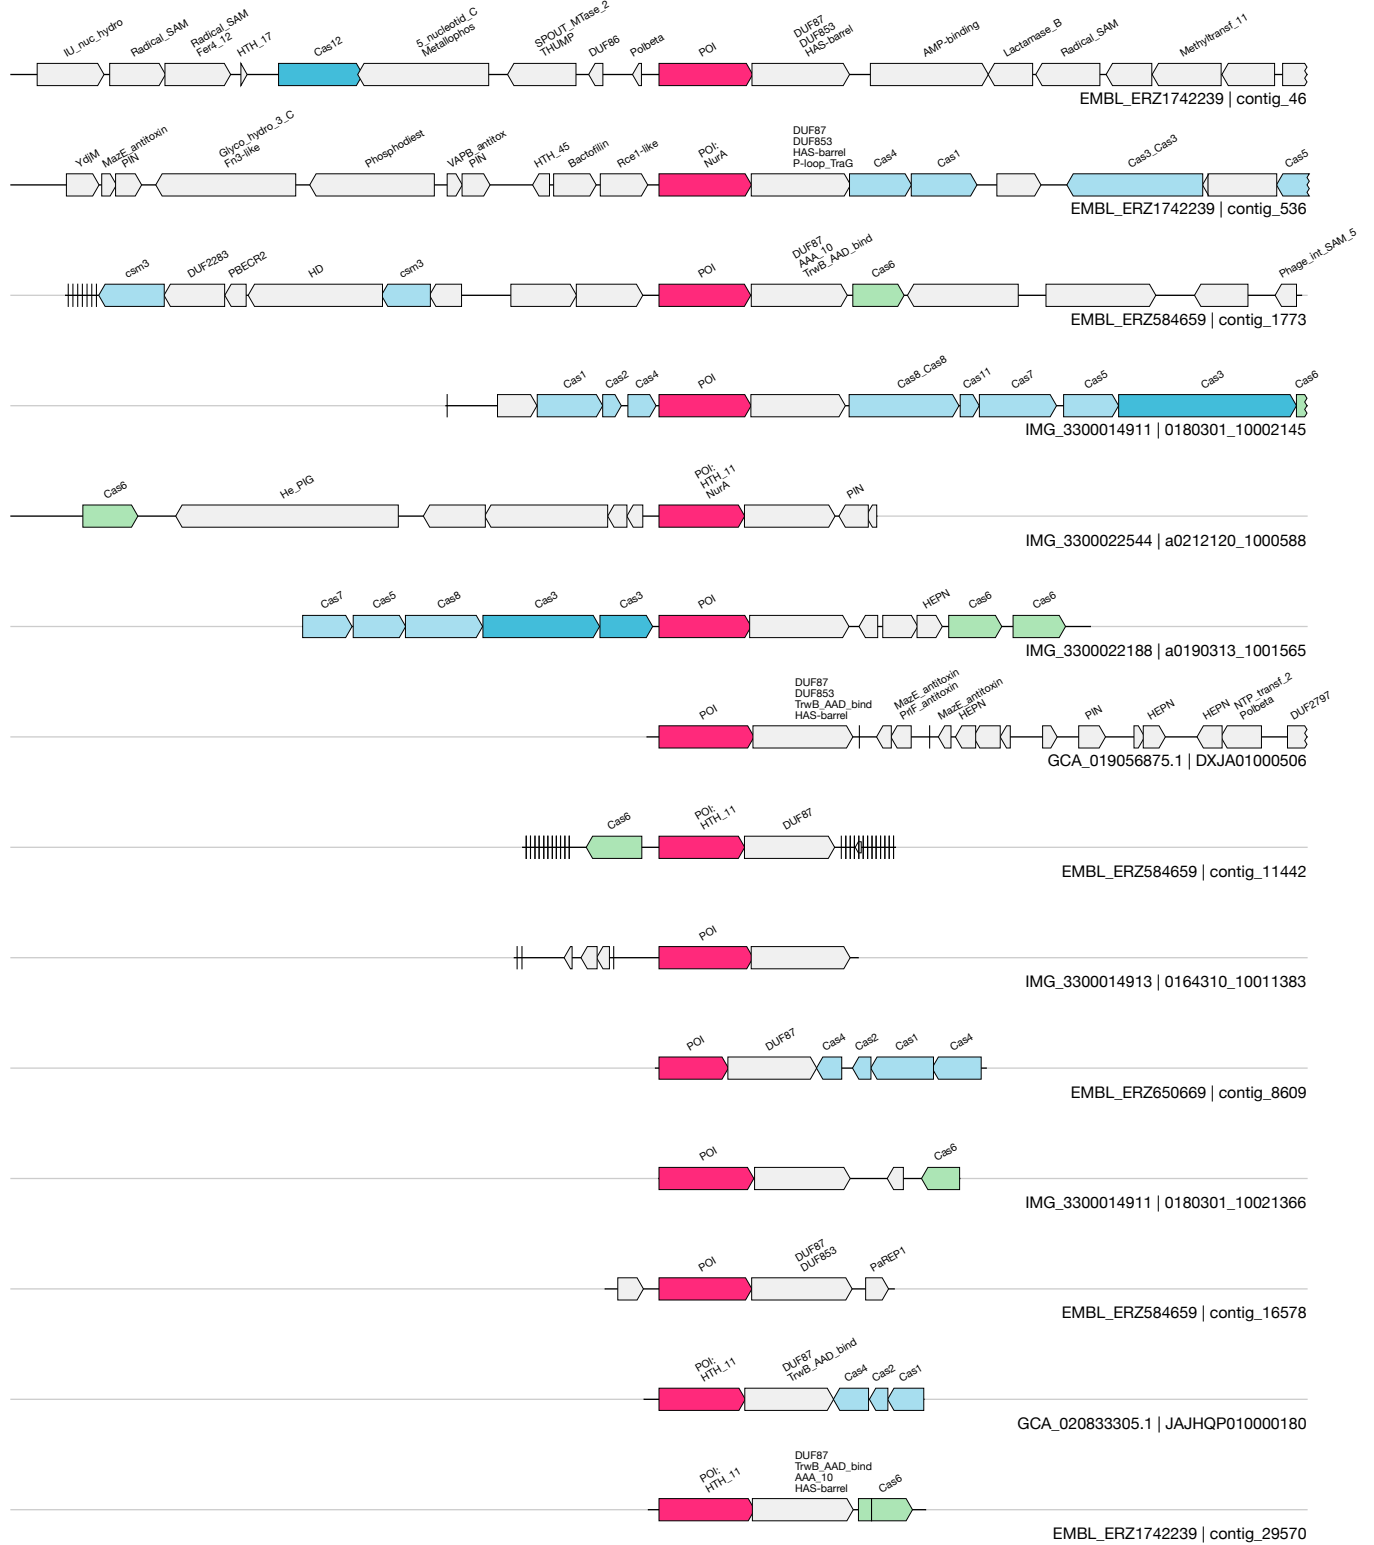

1kb

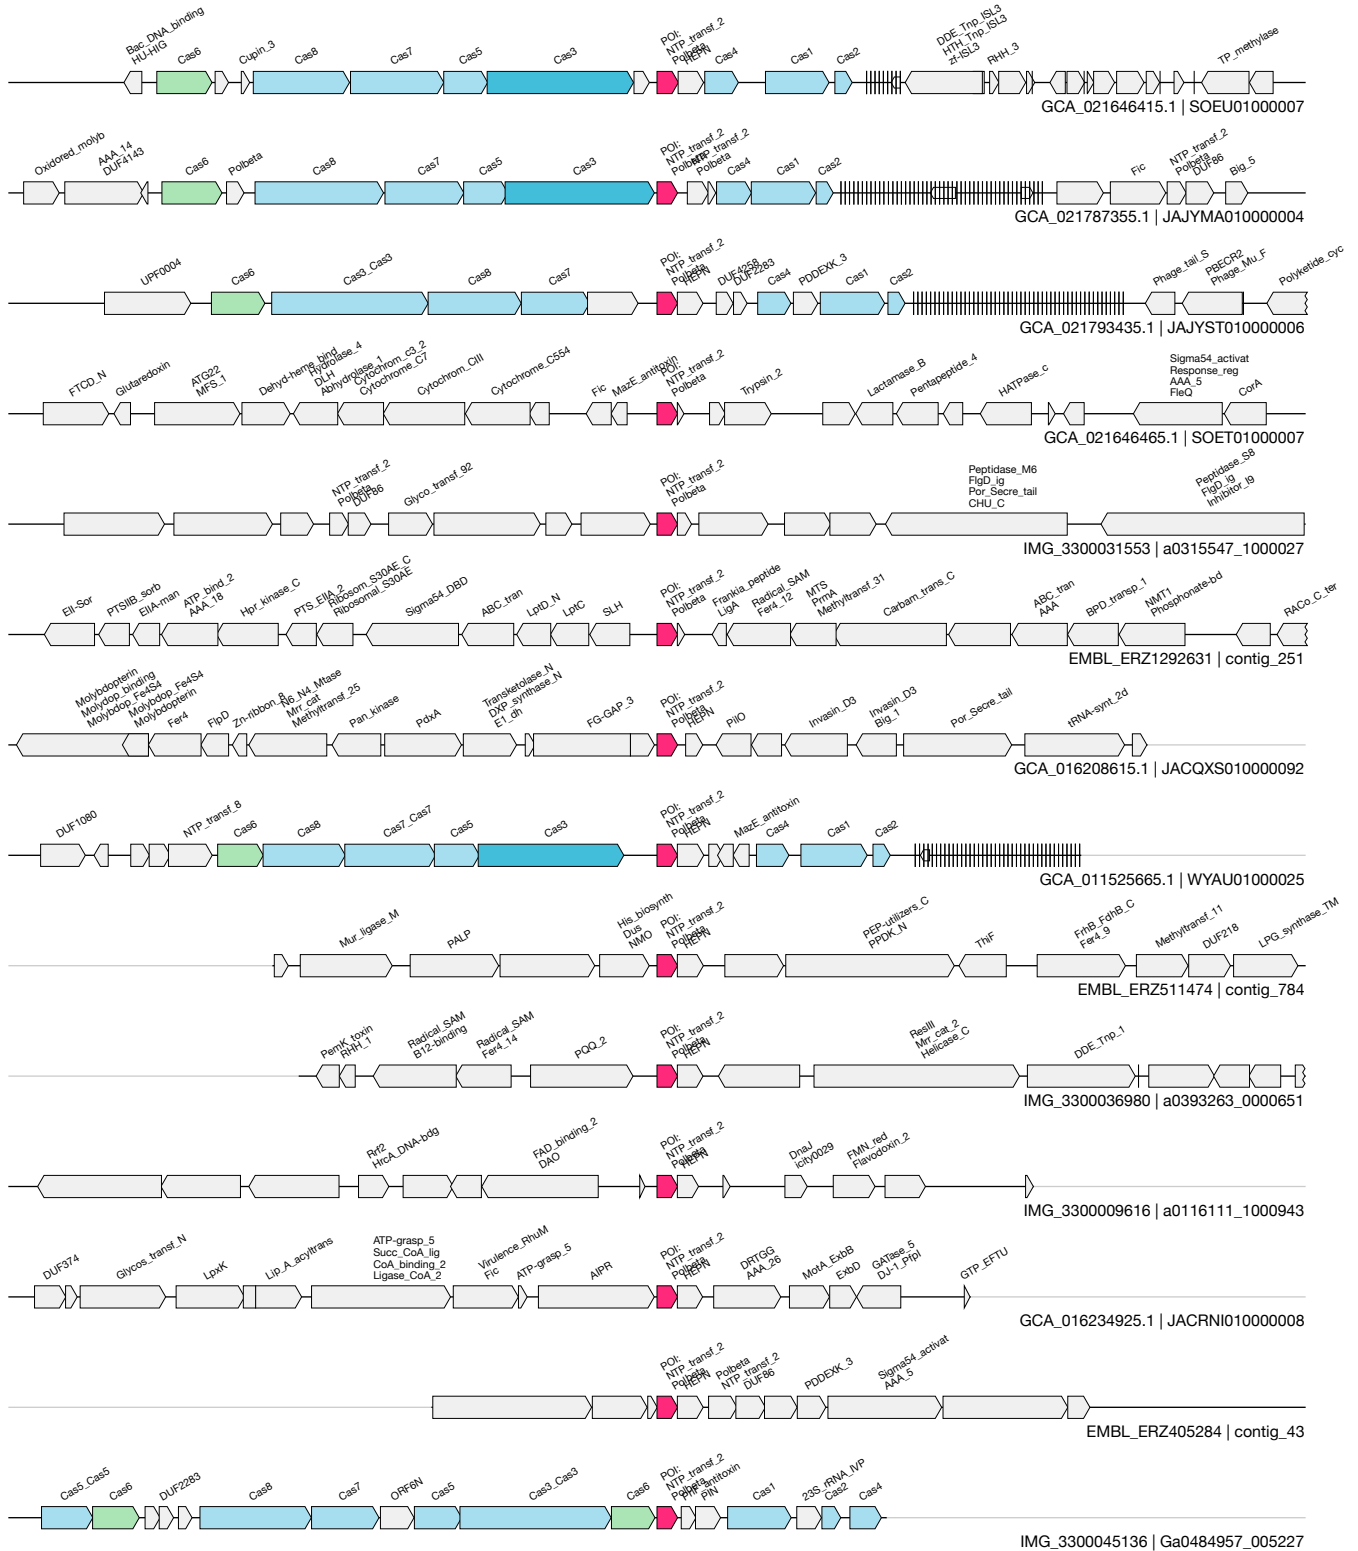

1kb

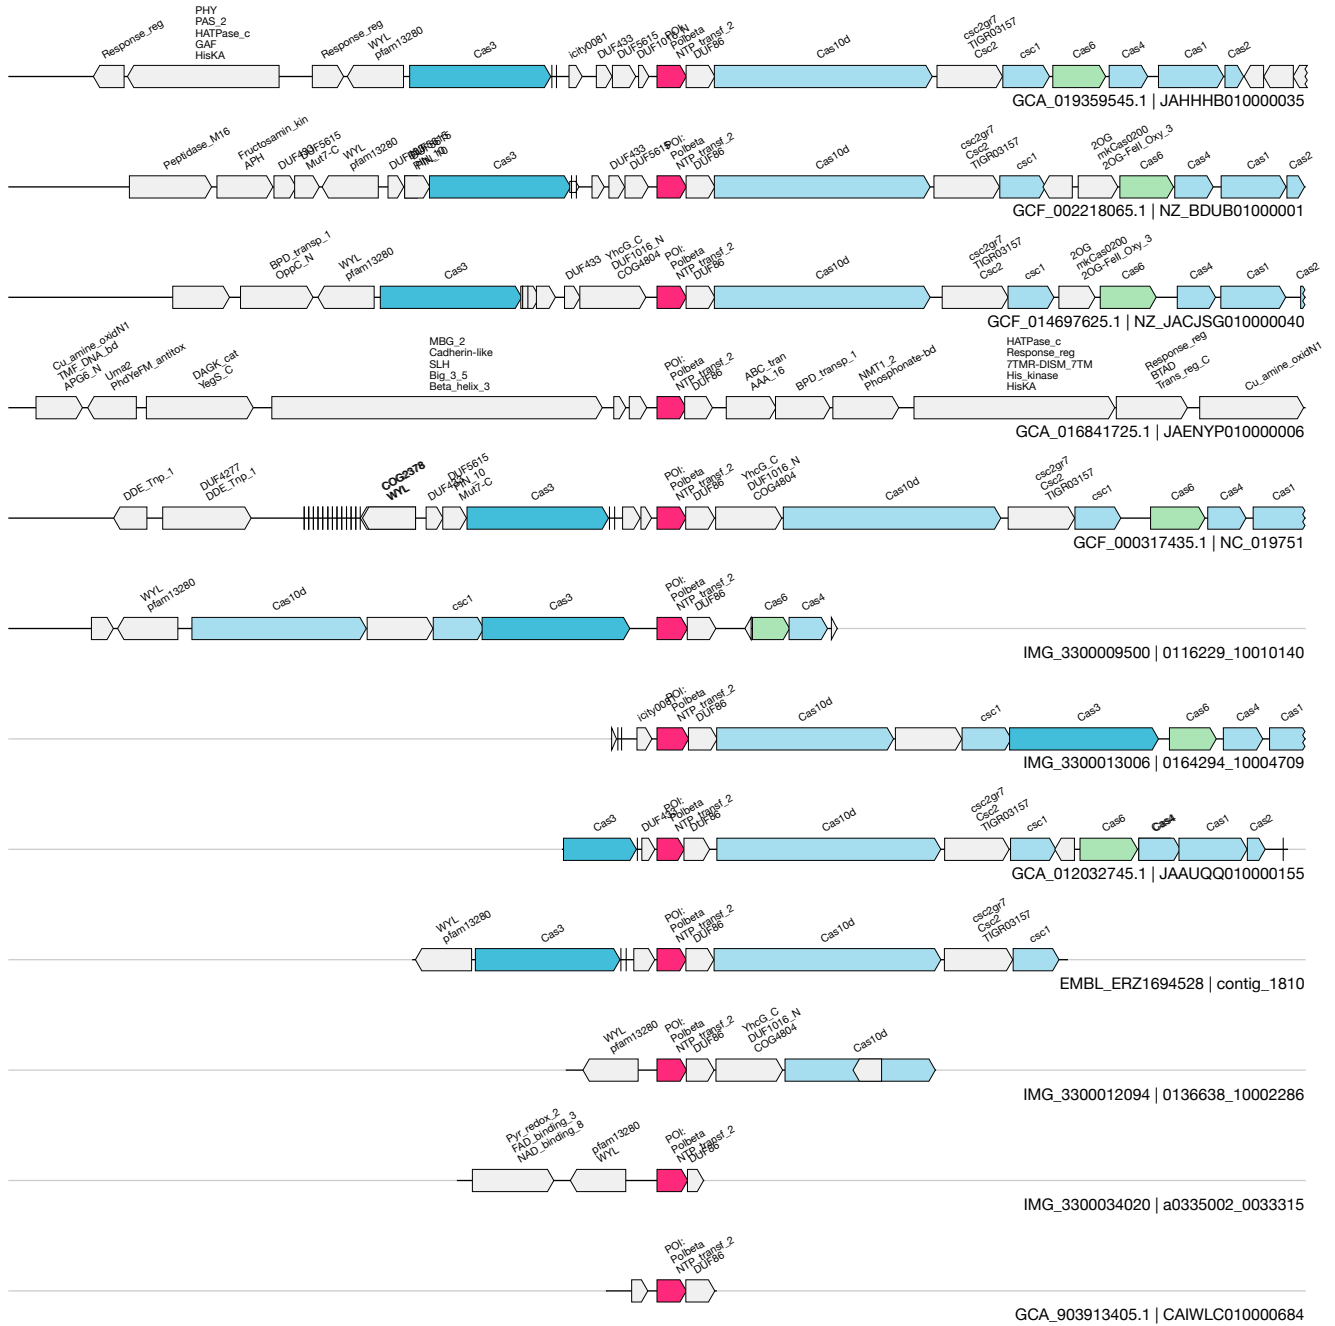

1kb

FR

**UAS-161**  
Toxin-Antitoxin

**(Cas9 HicAB TA)**  
GCF\_003337175.1&&NZ\_NETH01000035&&6357\_6546\_1

3 / 3.0

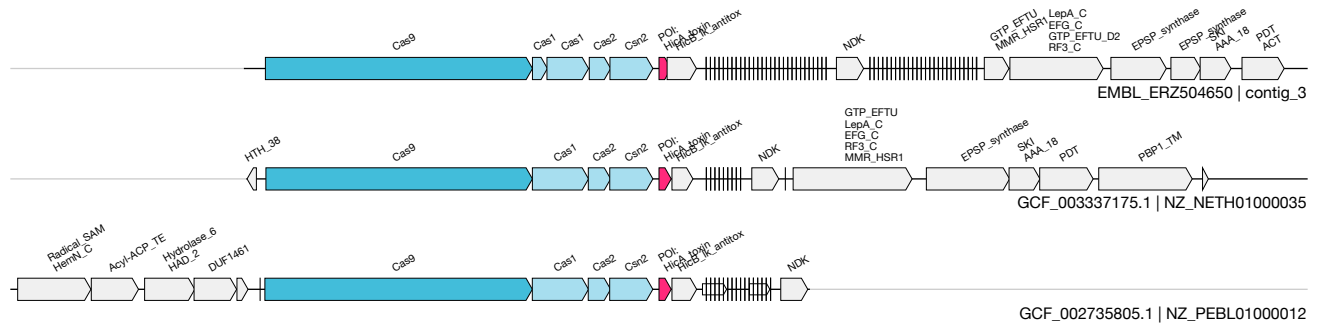

1kb

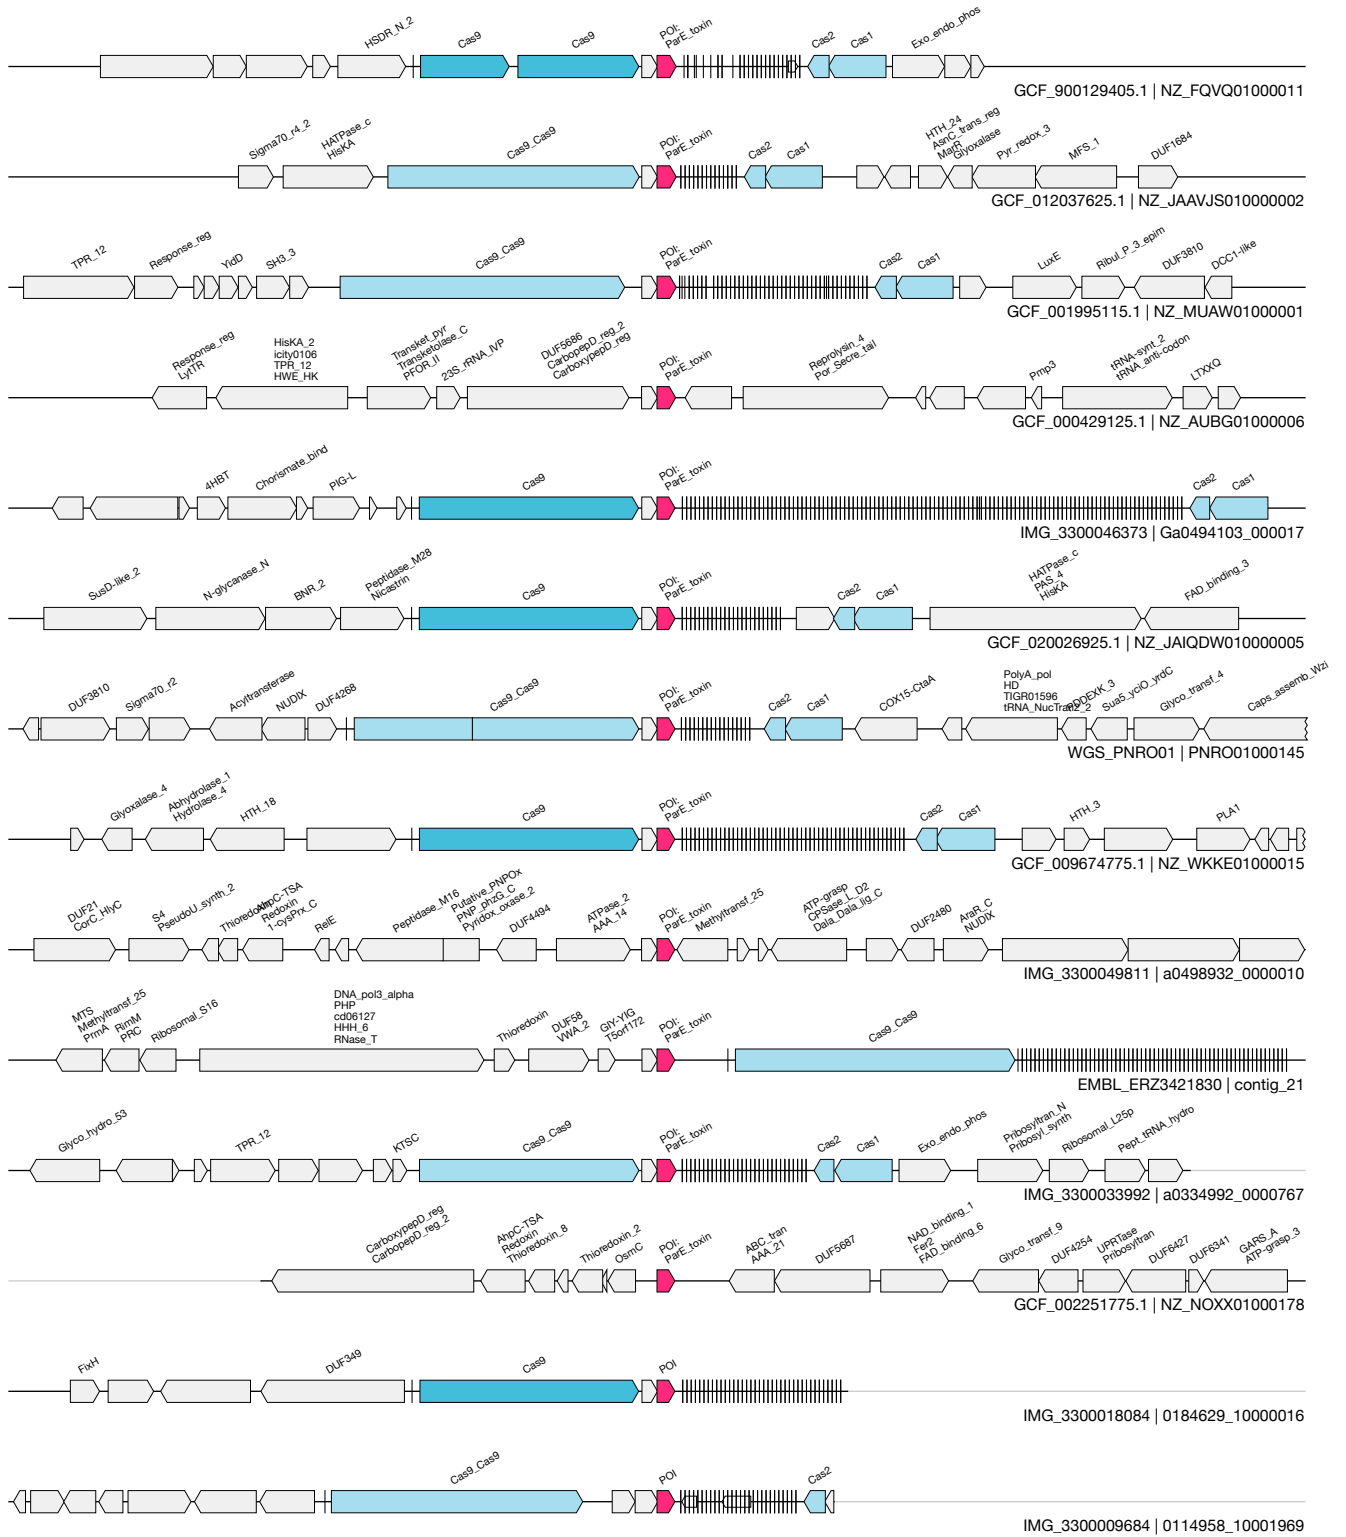

1kb

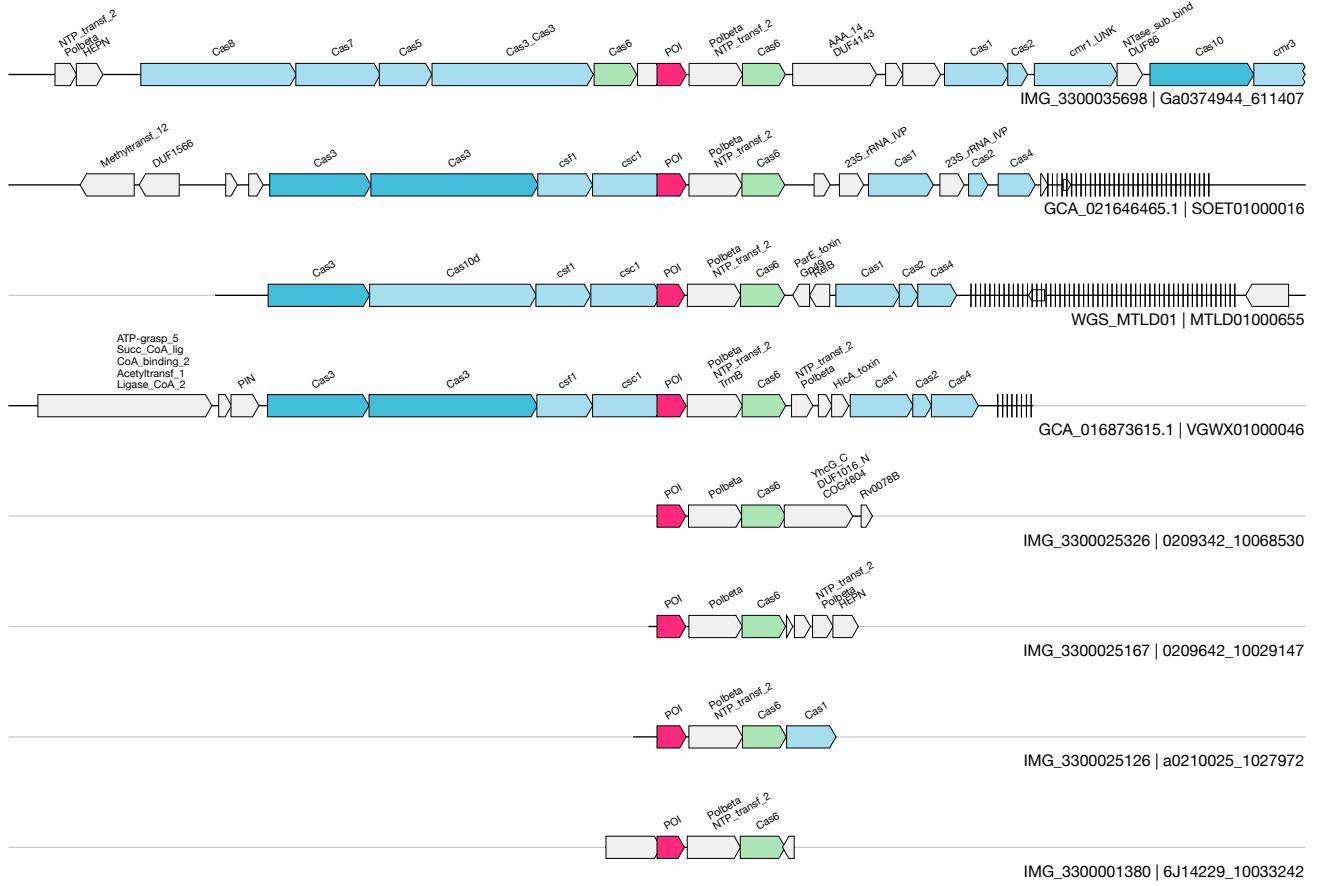

1kb

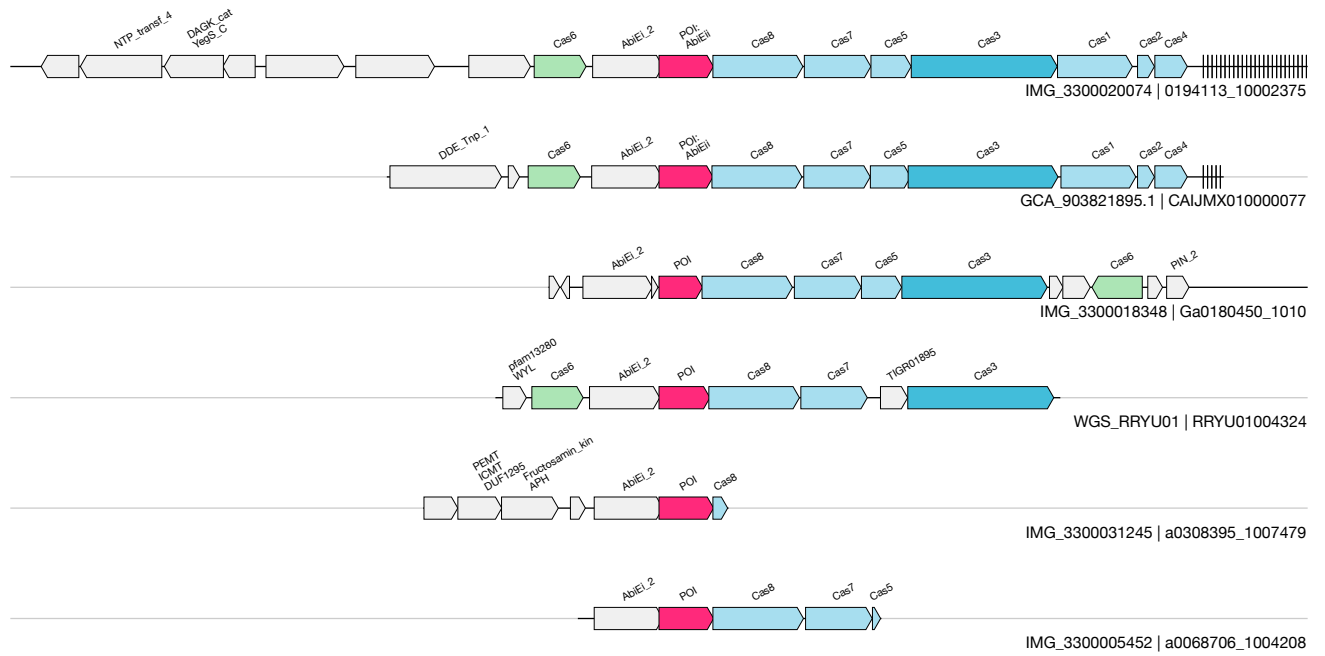

1kb

FV

**UAS-165**  
Toxin-Antitoxin

**(TA DUF3368 \_UPF0175)**  
IMG\_3300009455&&0114939\_10000745&&24543\_24870\_1

11 / 16.6

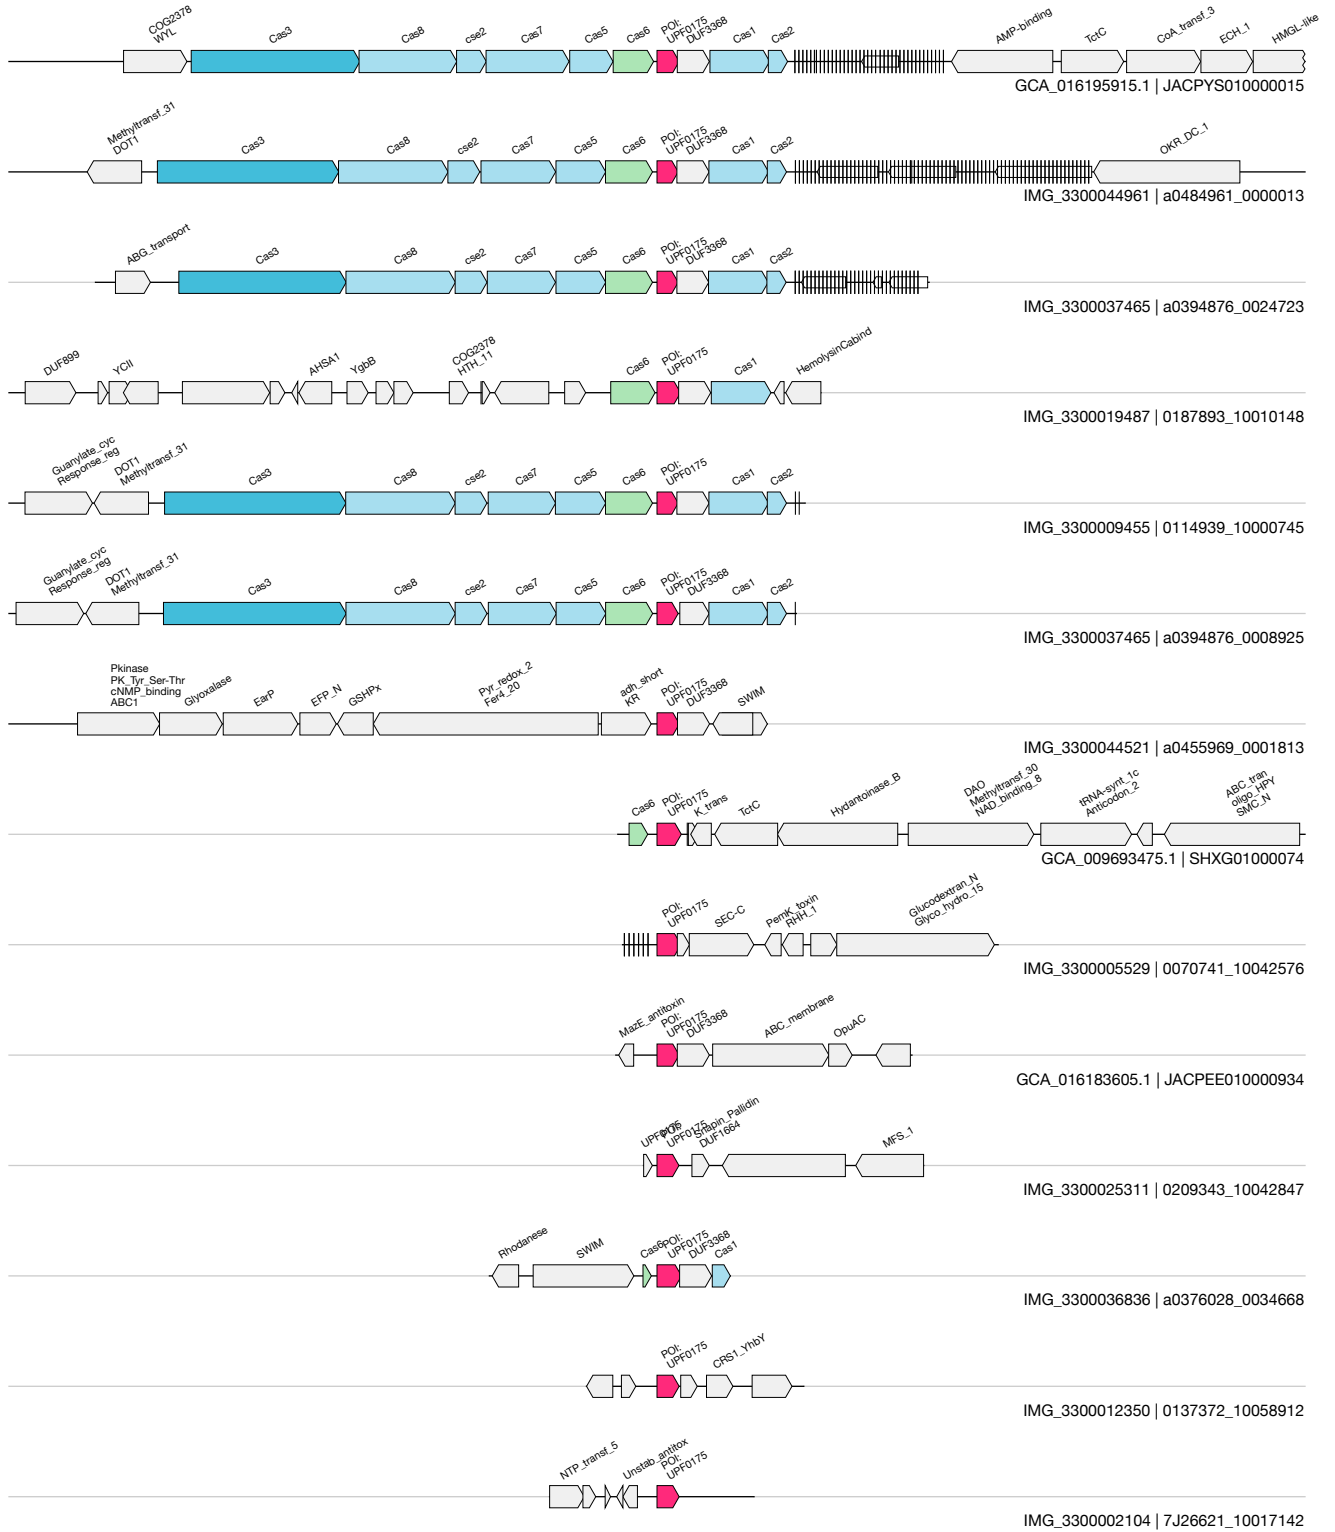

1kb





# FX

**UAS-167**  
Toxin-Antitoxin

**(TA system)**

7 / 7.3

IMG\_3300014205&&0172380\_10021645&&1390\_1759\_1

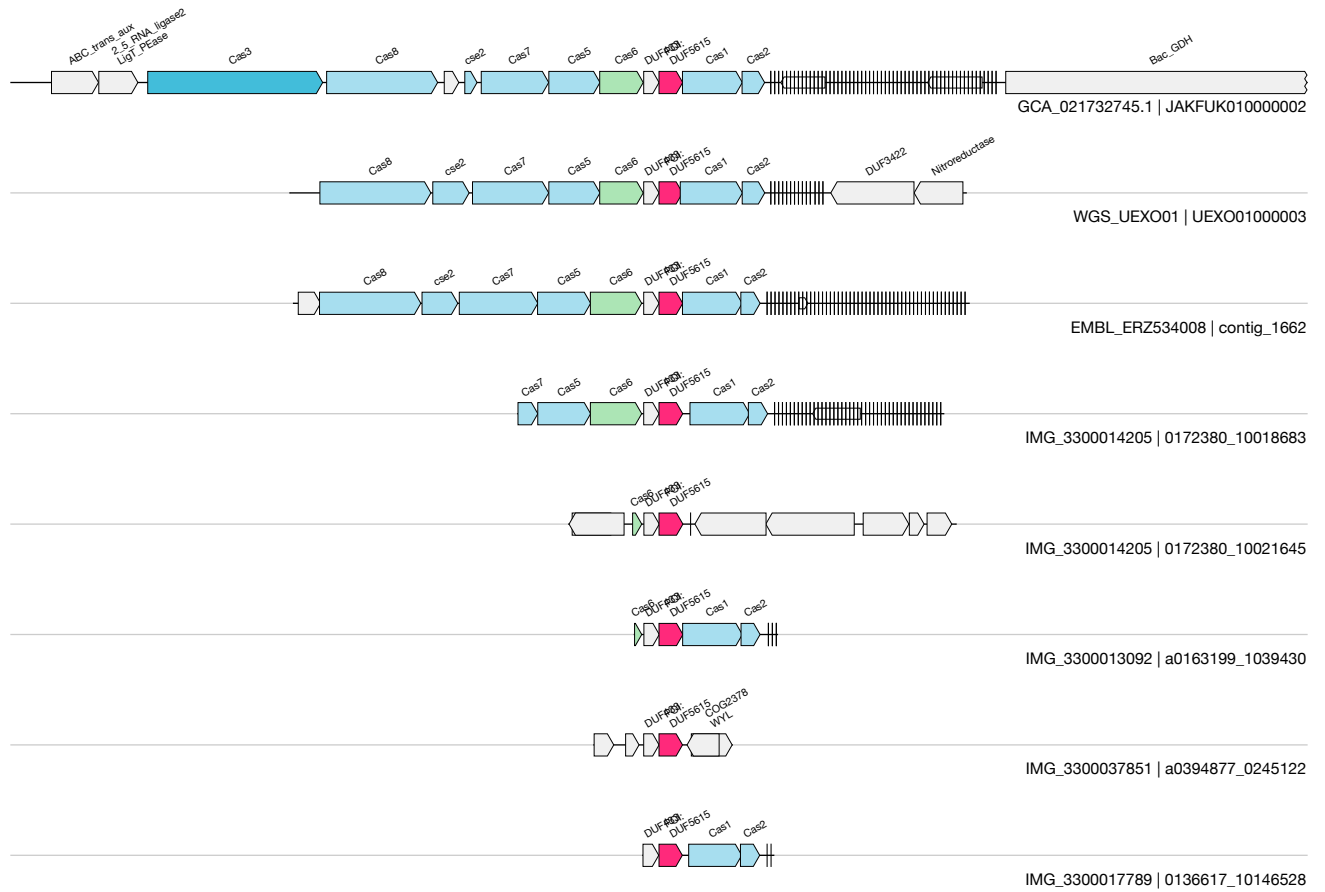

1kb

FY

**UAS-168**  
Toxin-Antitoxin

**(PHD + PIN TA)**  
IMG\_3300025308&&0209211\_10037079&&3340\_3646\_-1

3 / 3.9

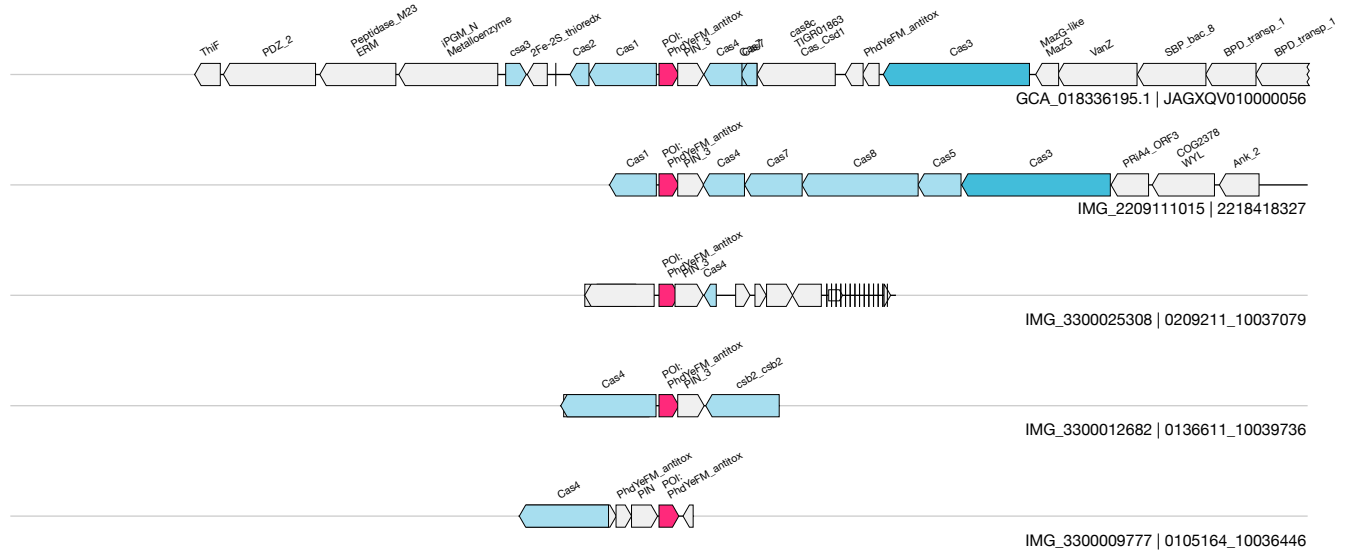

1kb

FZ

**UAS-169**  
Toxin-Antitoxin

**(DUF370 + RNaseH TA)**  
IMG\_3300031358&&a0307438\_1001316&&8395\_8671\_1

3 / 5.2

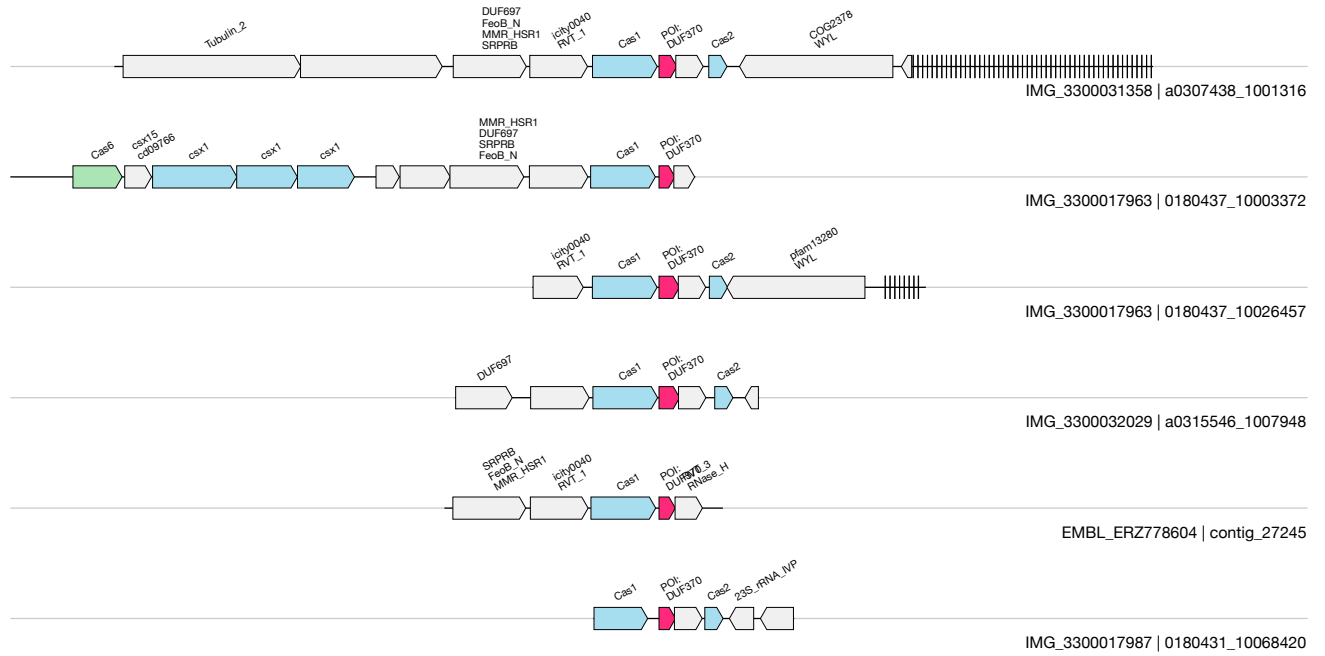

1kb

GA

**UAS-170**  
Toxin-Antitoxin

**(DUF2442 + DUF4160)**  
IMG\_3300034066&&a0335019\_0002251&&7799\_8117\_-1

3 / 3.0

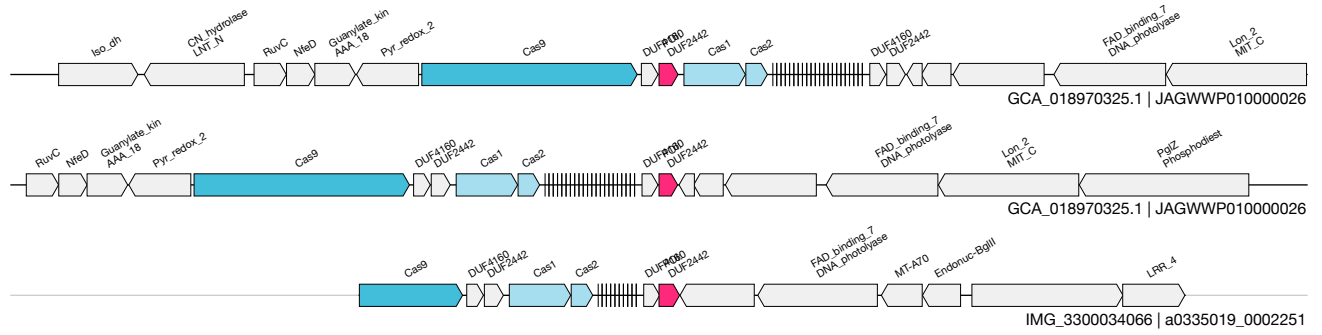

1kb

GB

**UAS-171**  
Toxin-Antitoxin

**(small ORFs)**  
IMG\_3300044960&&Ga0484958\_001236&&27209\_27470\_-1

43 / 48.3

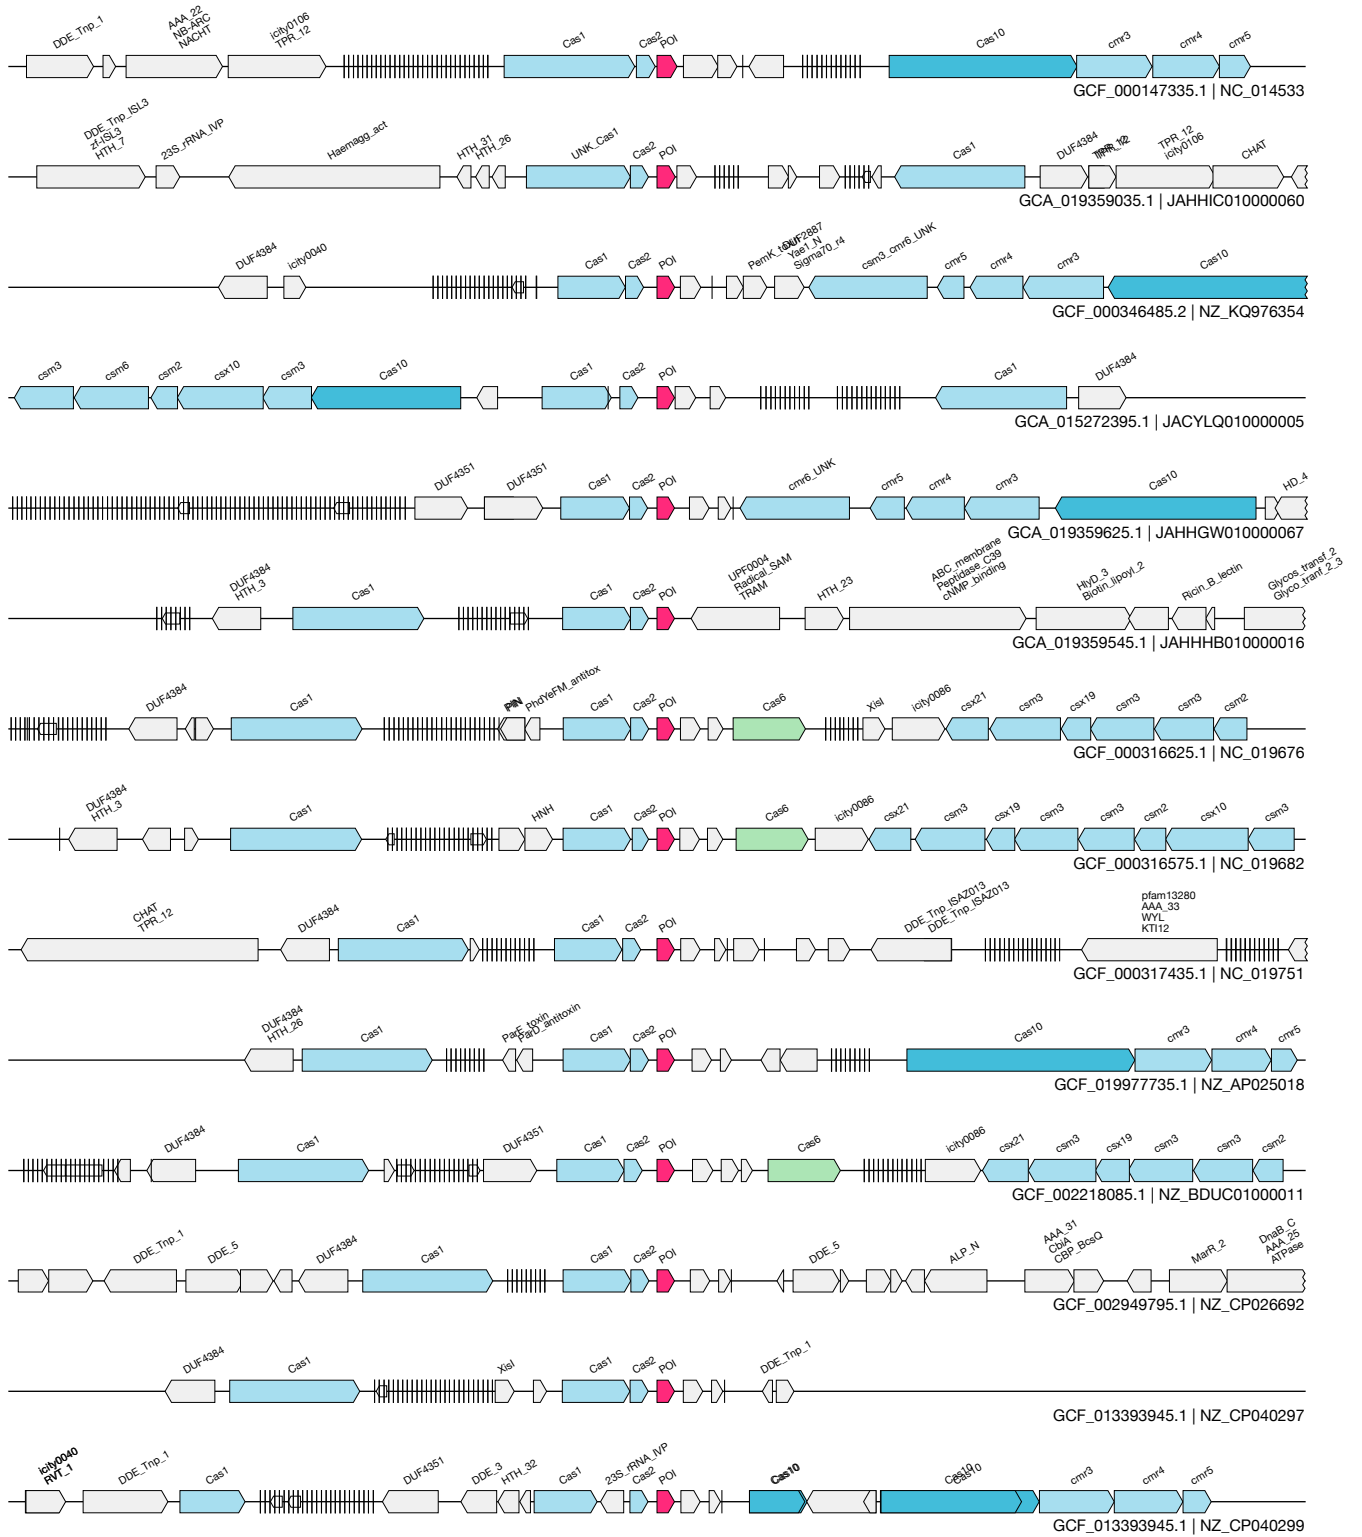

1kb

# GC

**UAS-172**  
Toxin-Antitoxin

**(RHH TA system)**  
IMG\_3300045747&&a0485825\_0053347&&1617\_1944\_1

23 / 35.0

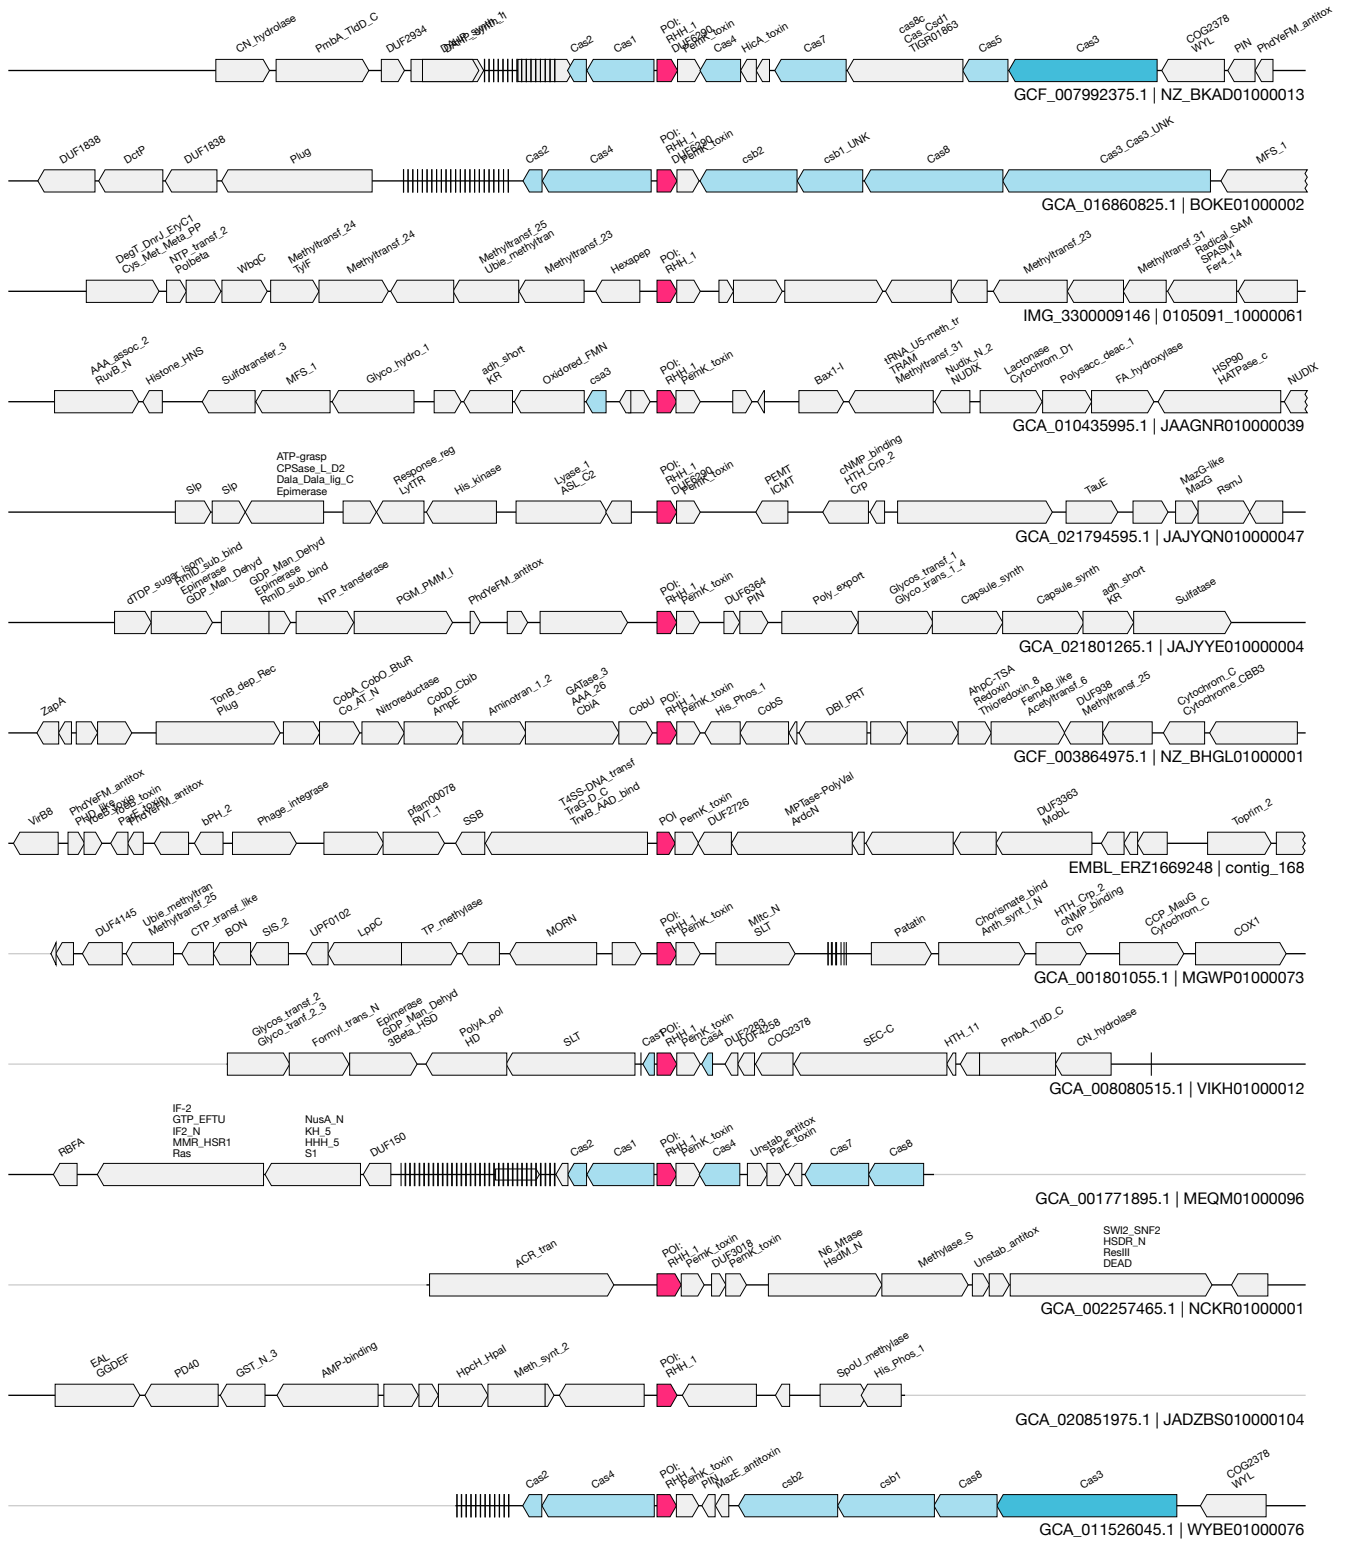

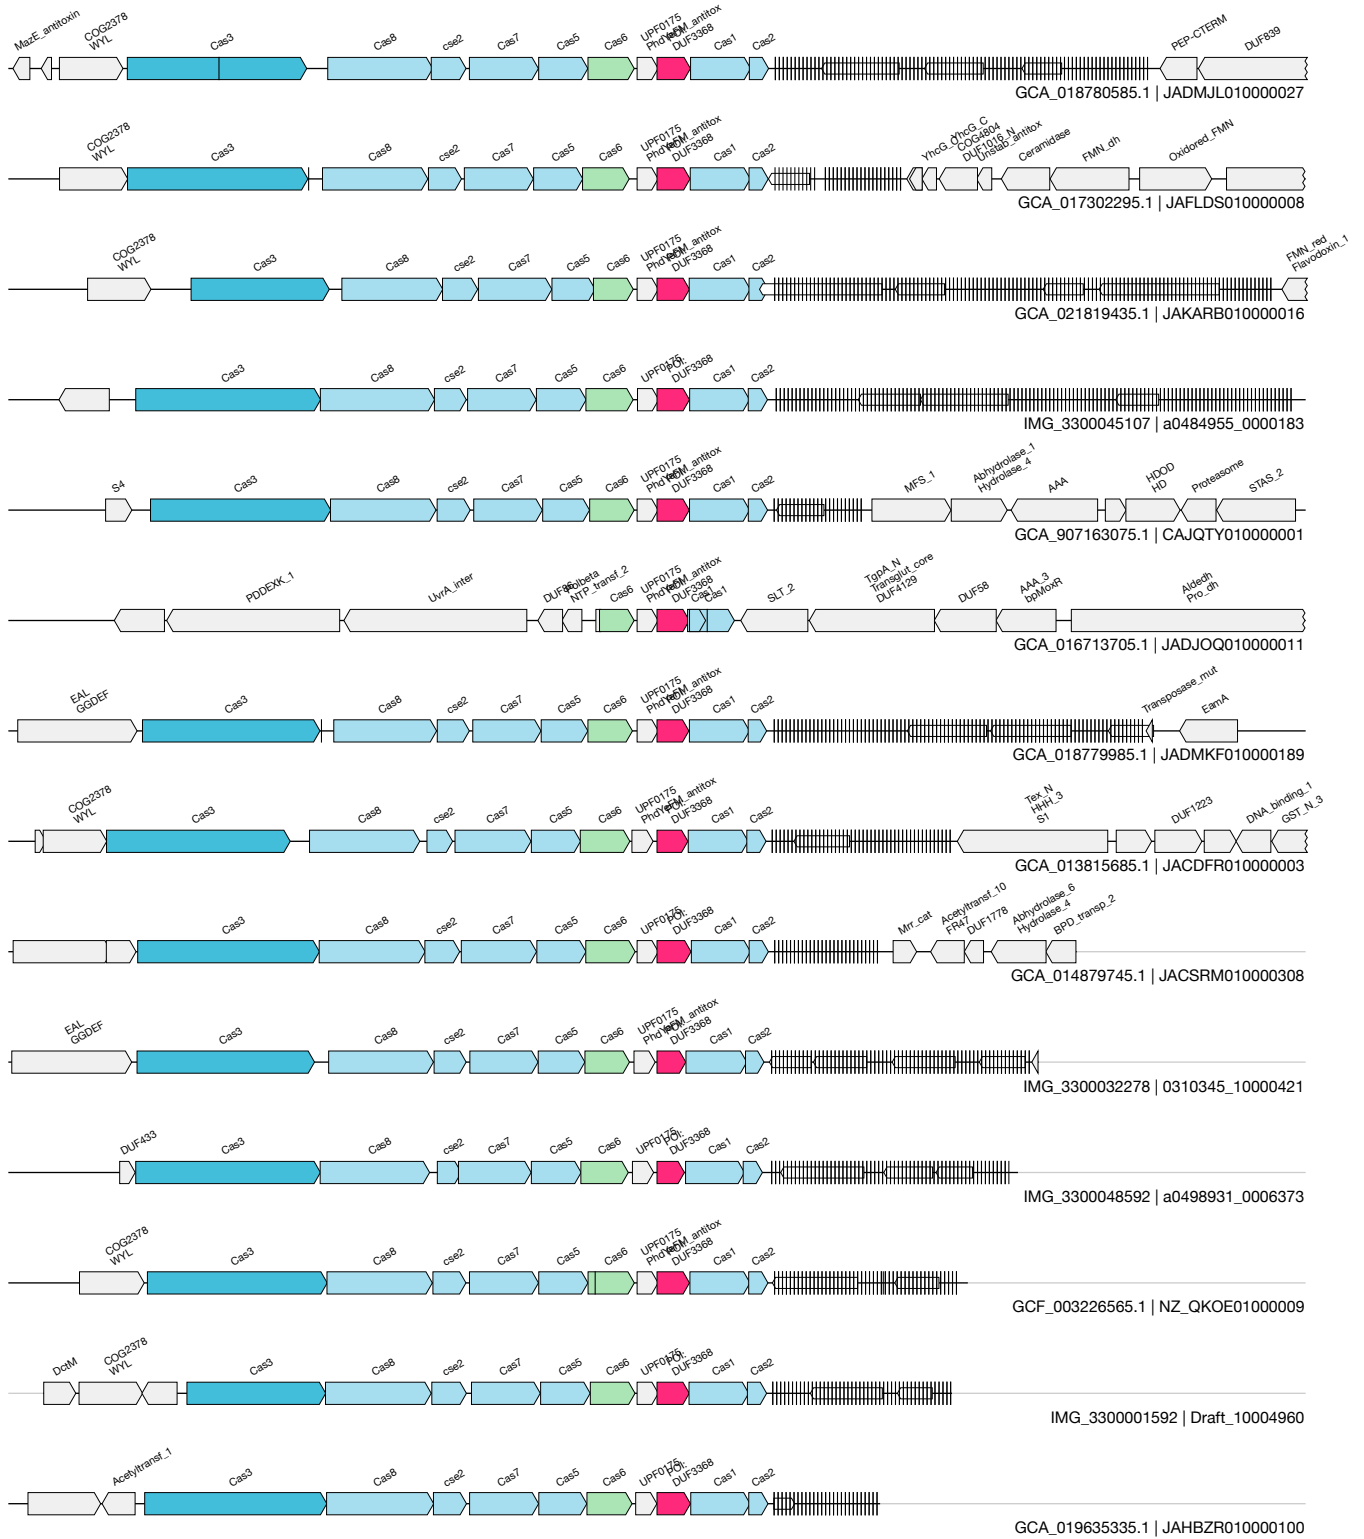

1kb



# GE

M2  
Giant

(massive defense genes)  
EMBL\_MGYG000003147&&MGYG000003147\_7&&47692\_56296\_-1

3 / 3.0

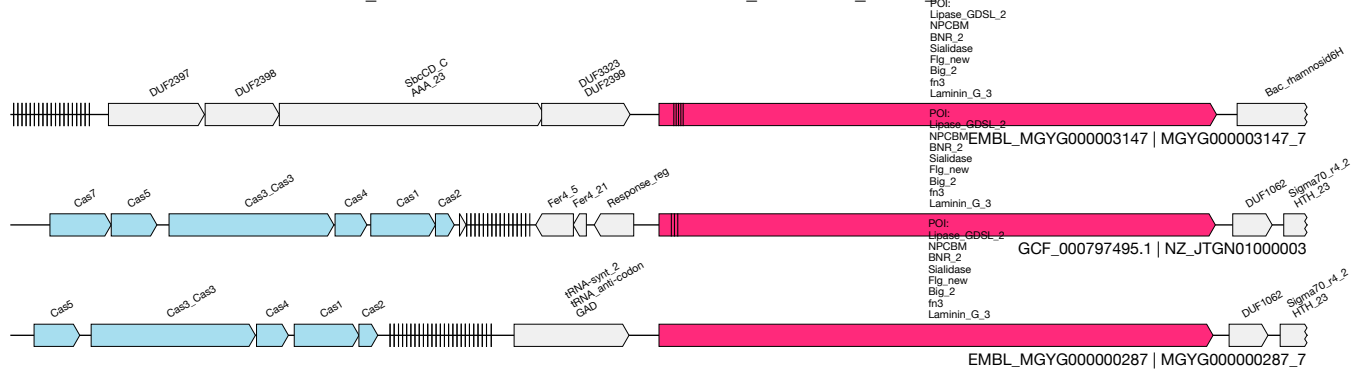

1kb

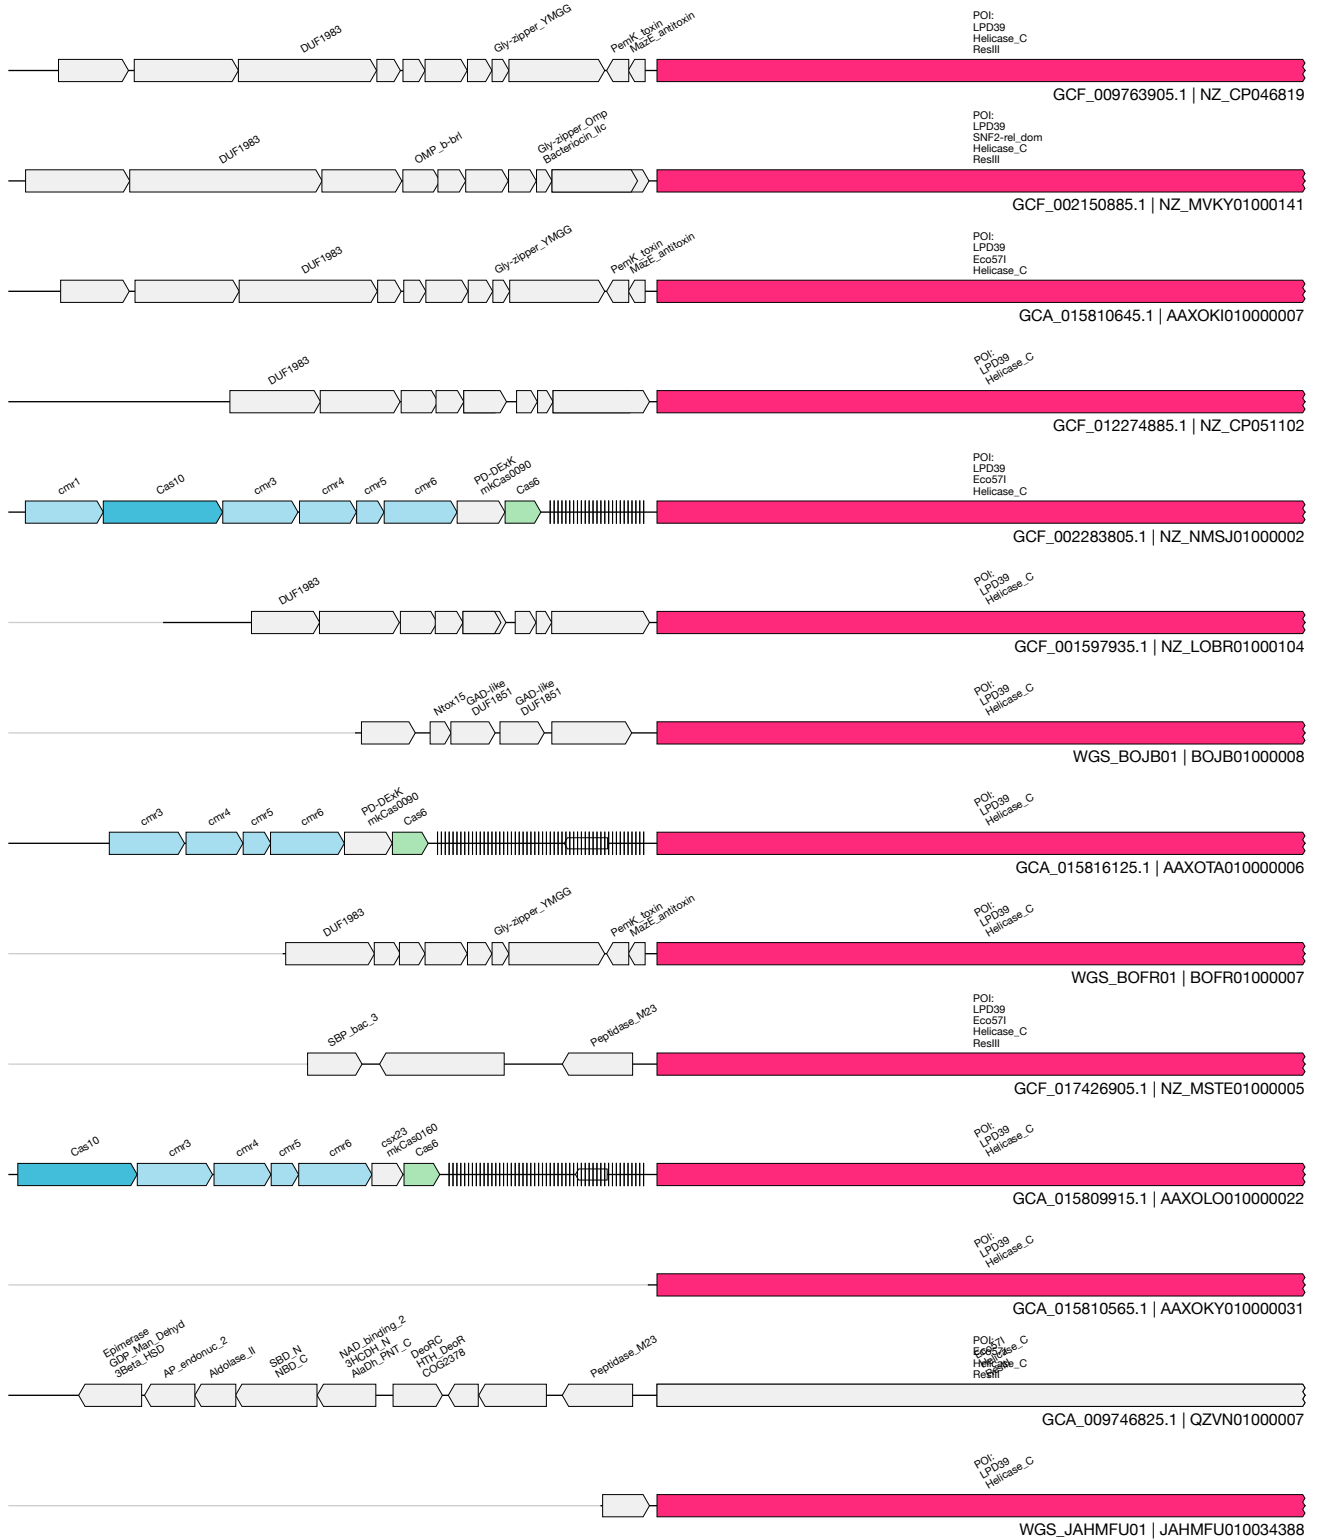

1kb



(tRNA array DEDDh)

Non-CRISPR\_tRNA\_arrays

GCF\_016469335.1&NZ\_CP059888&&1400143\_1401604\_1

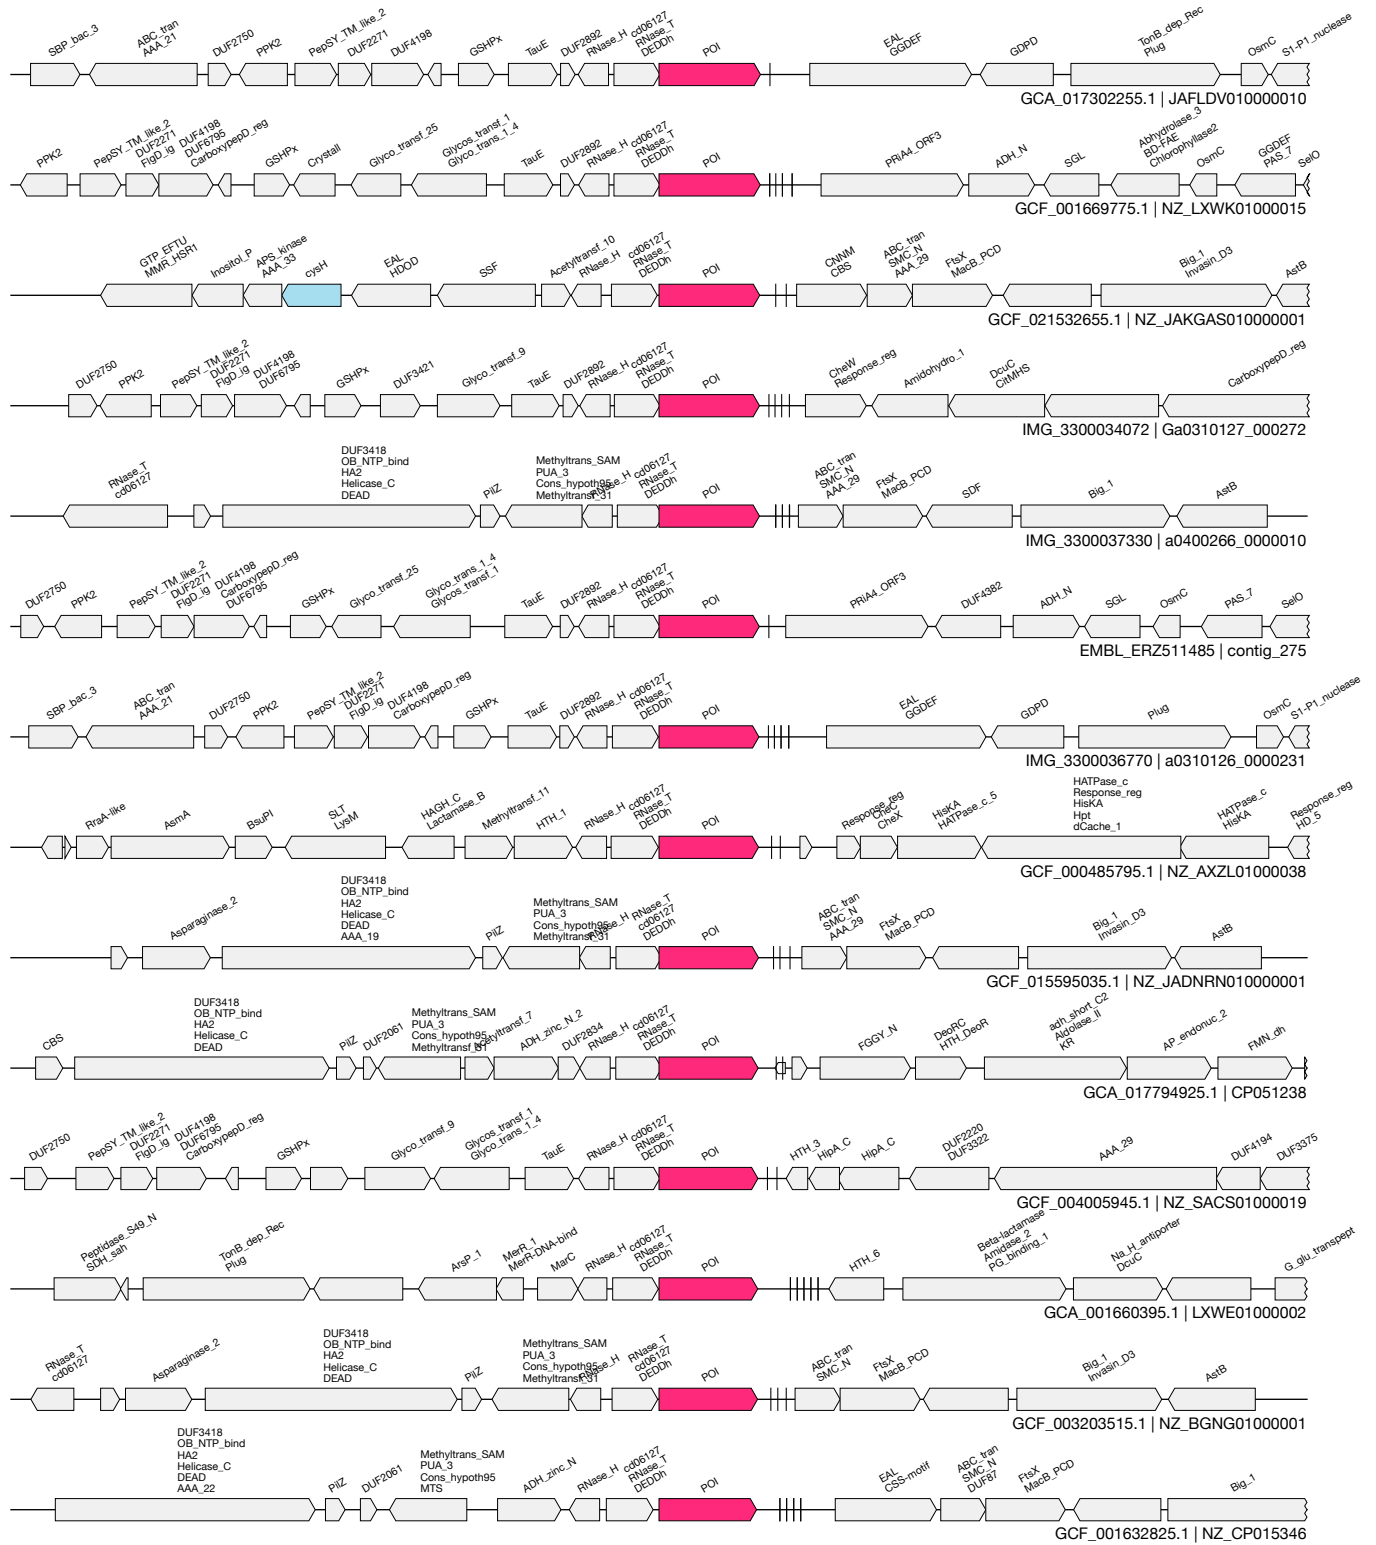

1kb

(tRNA array ribonuclease)

Non-CRISPR\_tRNA\_arrays

IMG\_3300012943&&0164241\_10000118&&68729\_72041\_1

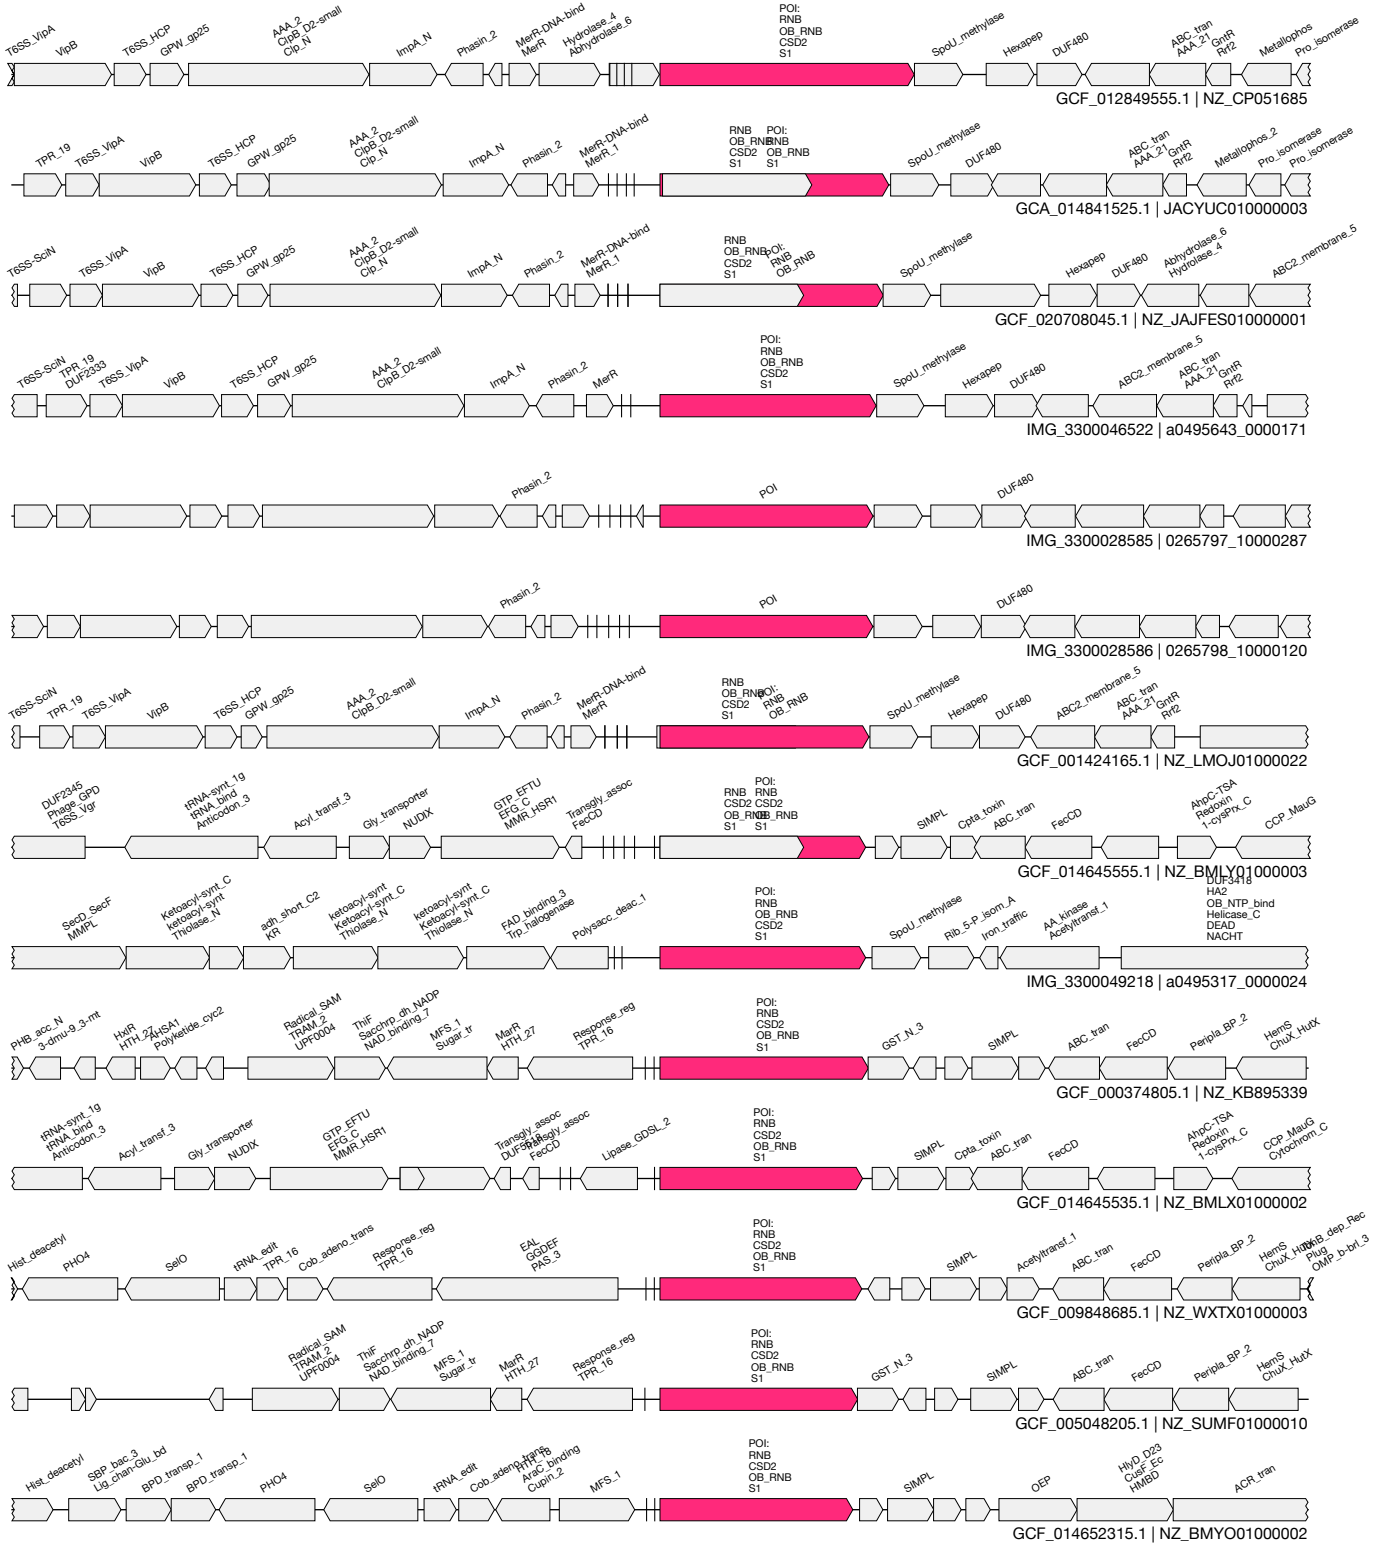

1kb

(DUF3800 standalone)

Non-CRISPR\_hypervariable\_repeat EMBL\_ERZ795038&&contig\_16642&&892\_1681\_1

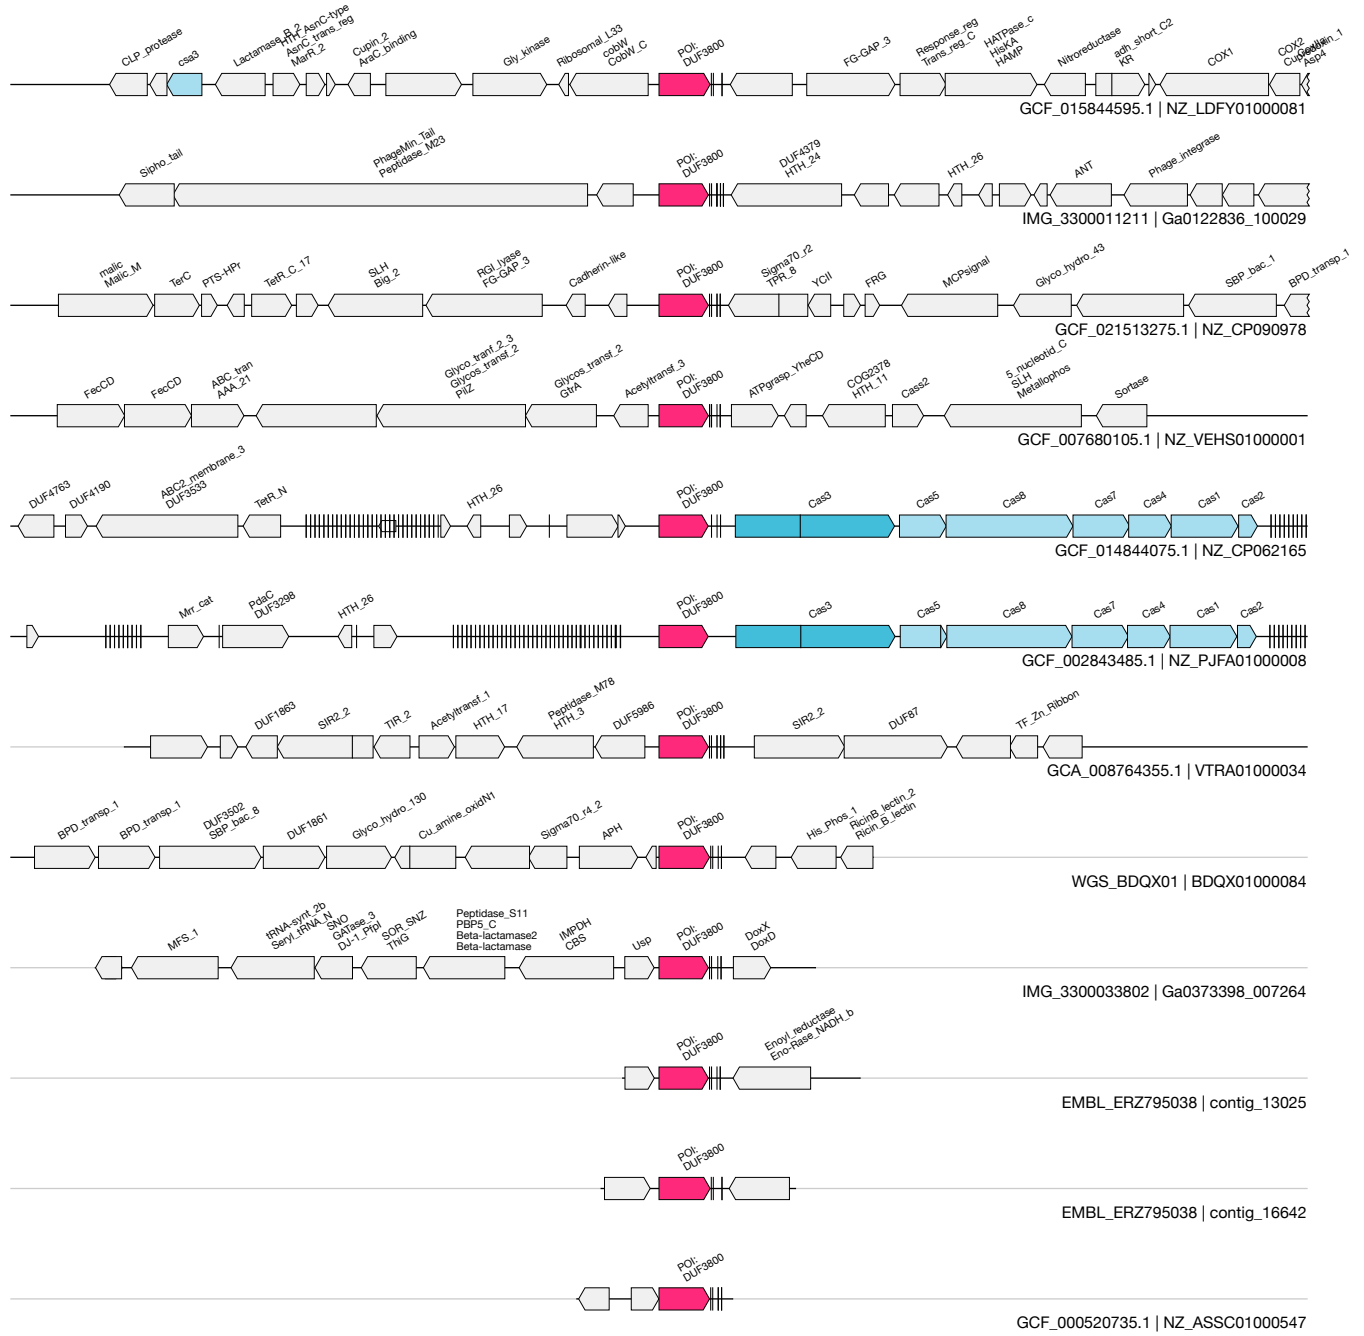

1kb

(PDEXK + Metallophosphatase)

Non-CRISPR\_hypervariable\_repeat EMBL\_ERZ825177&&contig\_7965&&5053\_8428\_1

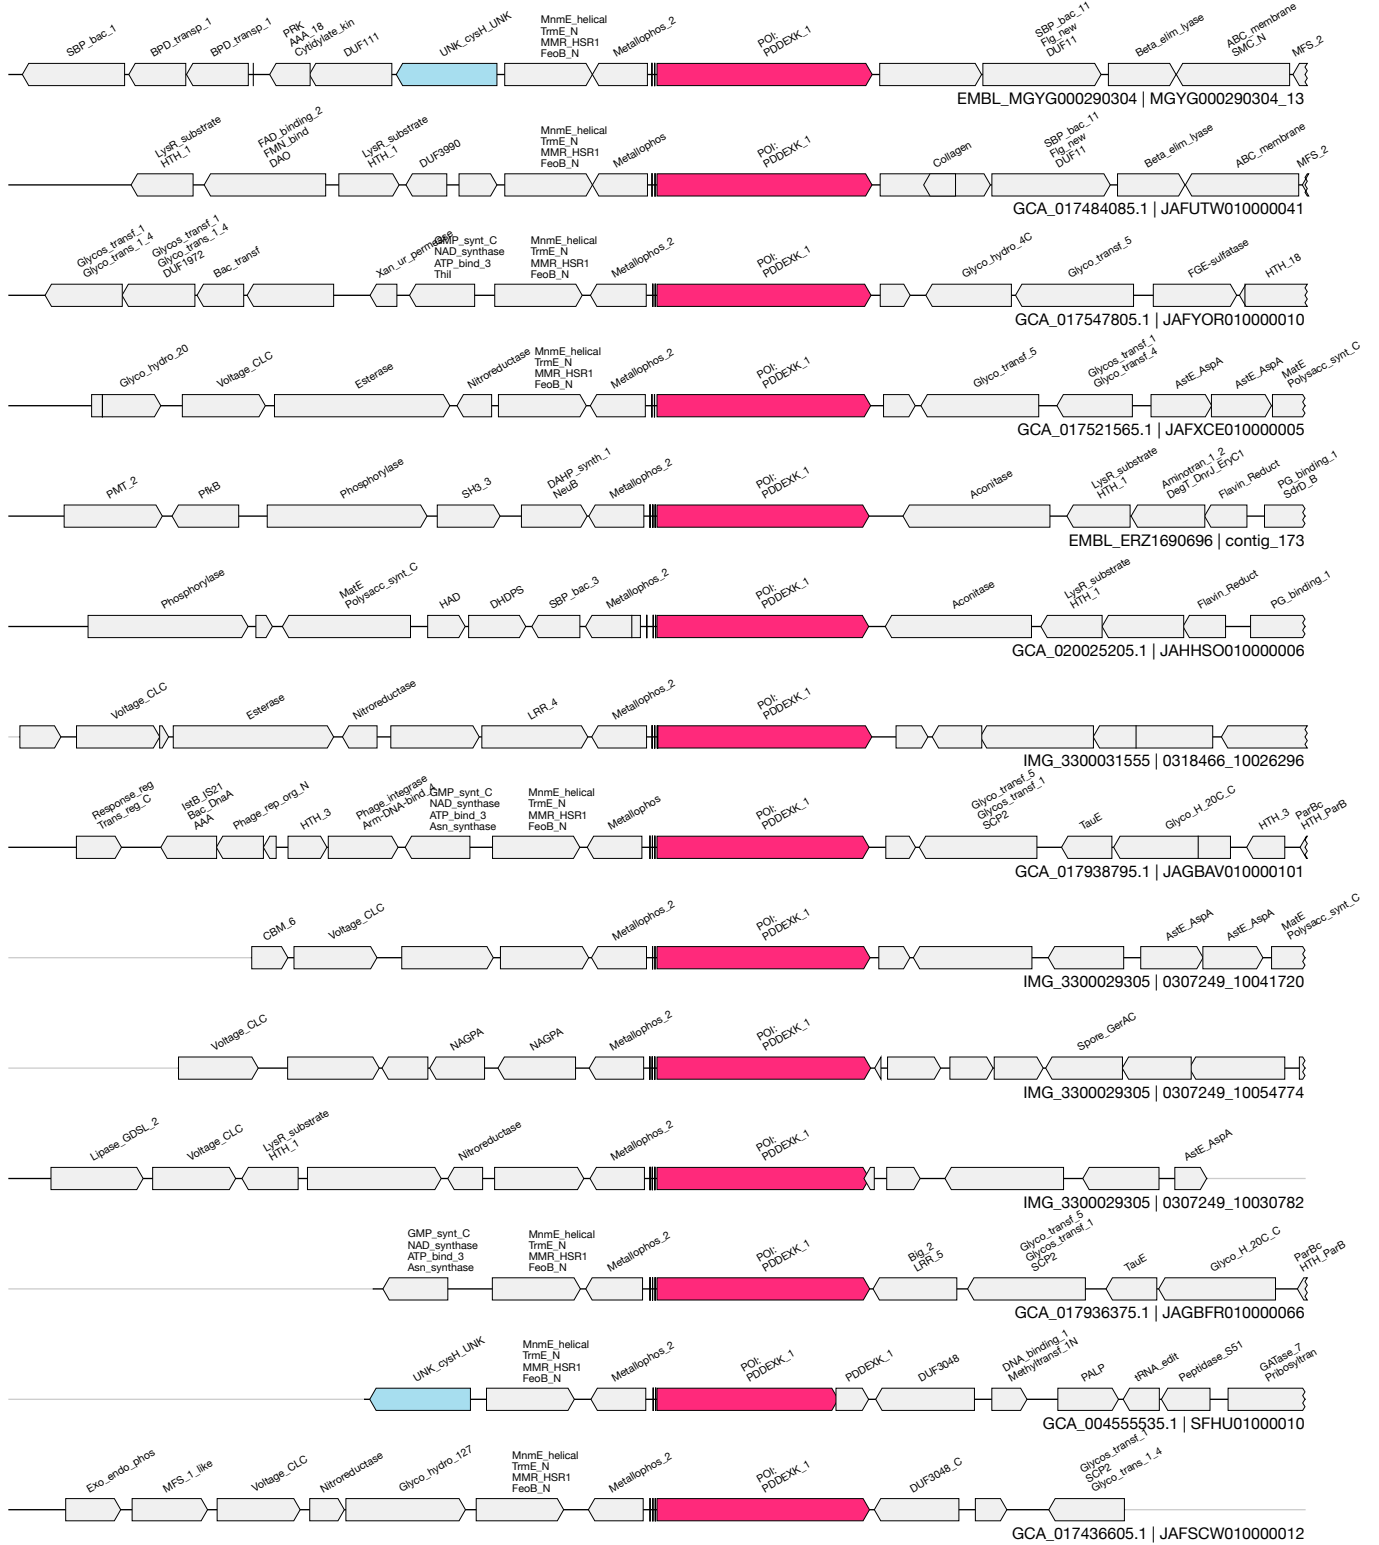

1kb

(PDEXK\_ATPase)

Non-CRISPR\_hypervariable\_repeat EMBL\_ERZ842383&&contig\_35002&&108\_1647\_-1

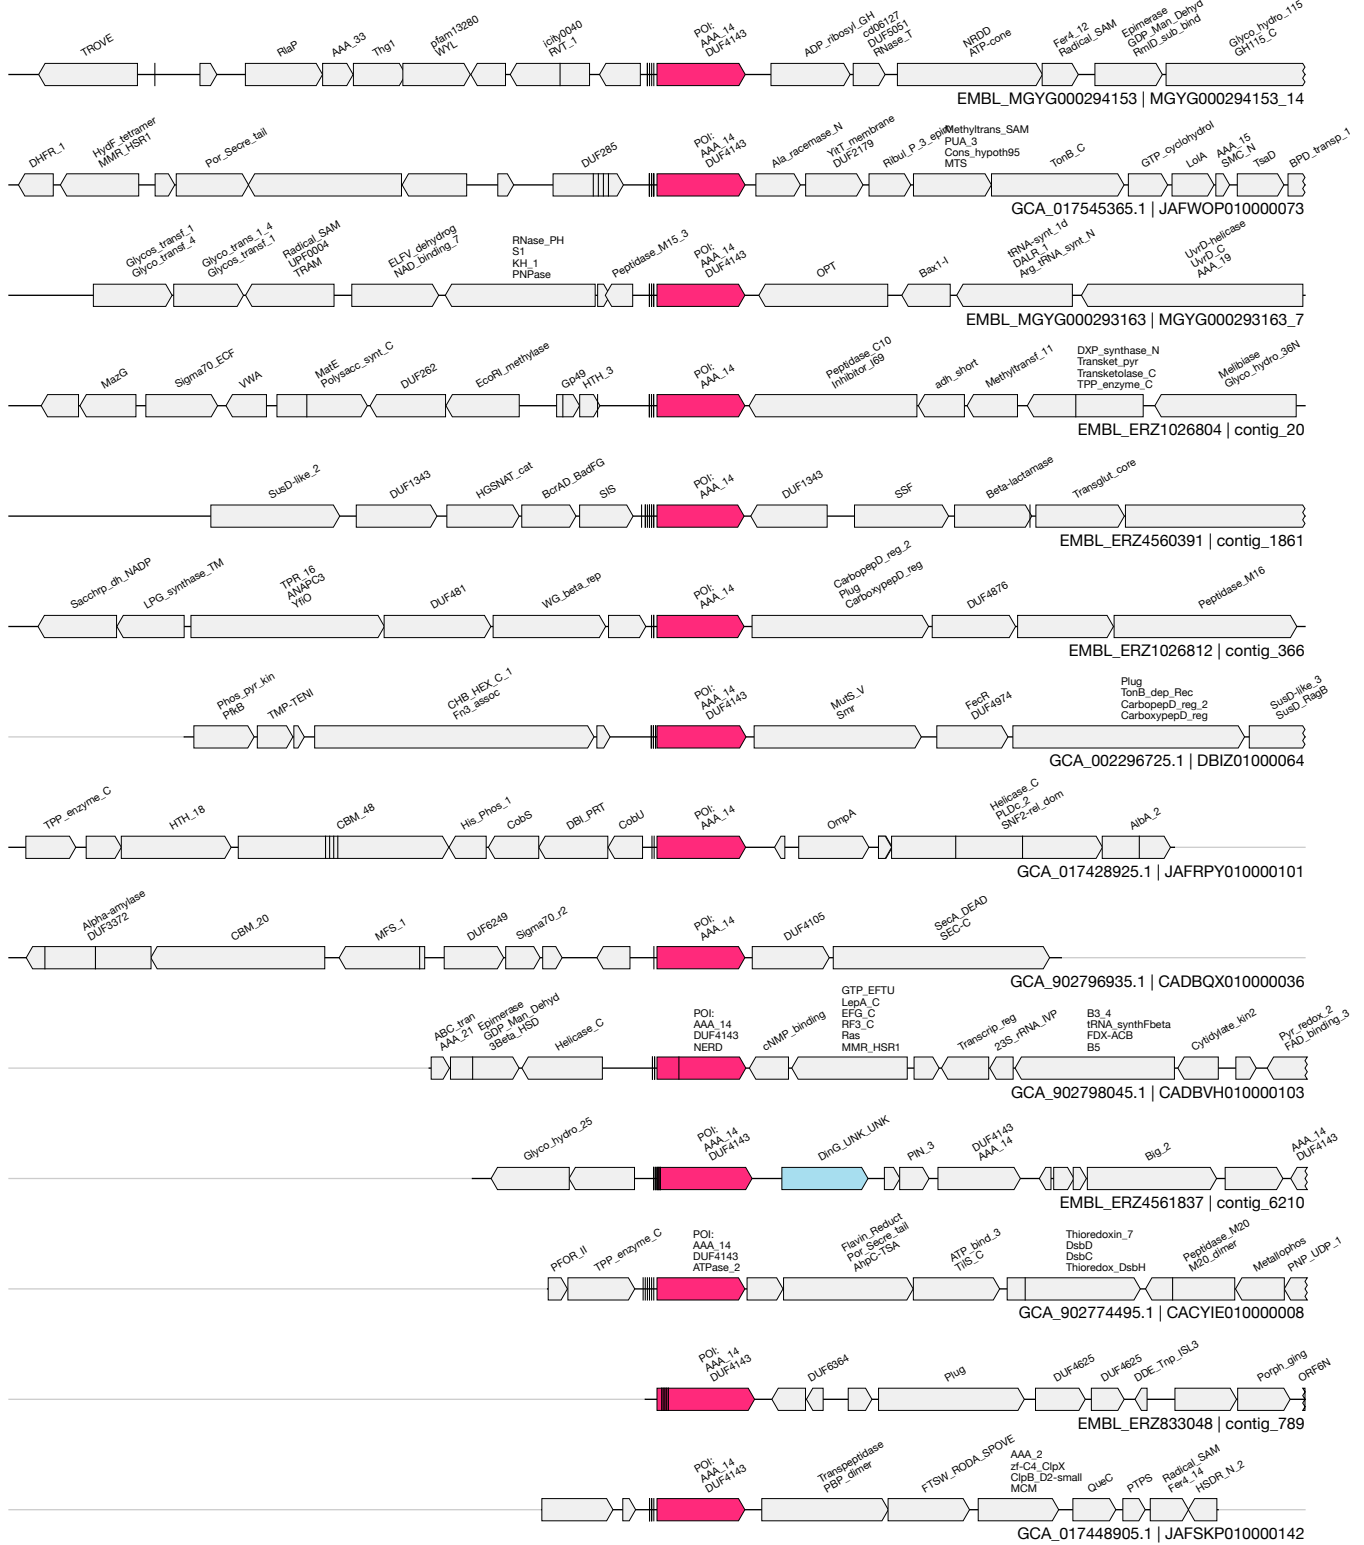

1kb



(PLMP\_corA-like)

Non-CRISPR\_hypervariable\_repeat GCA\_014804555.1&&JAAUZ0010000014&&4635\_6039\_-1

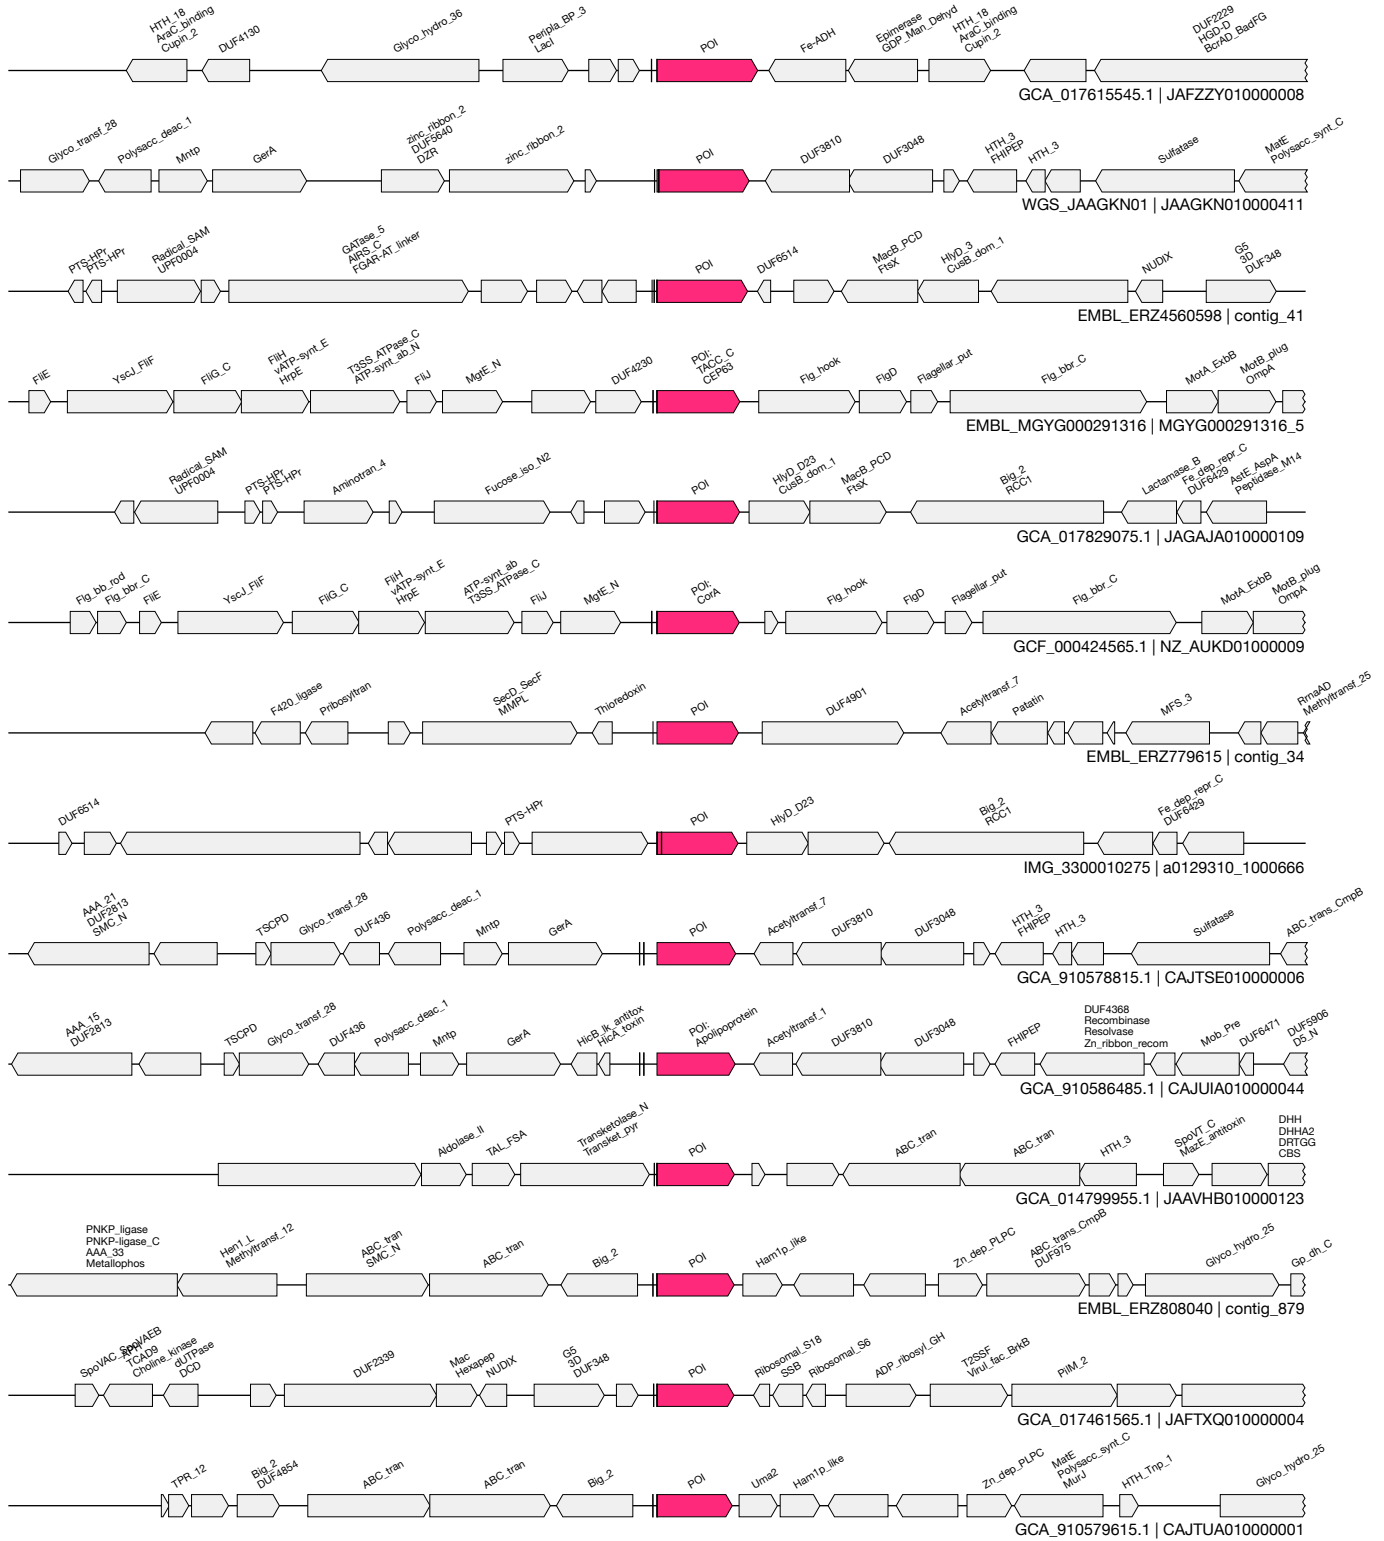

1kb

(DUF222\_HNH)

Non-CRISPR\_hypervariable\_repeat GCF\_000442645.1&&NC\_021915&&2150743\_2152009\_1

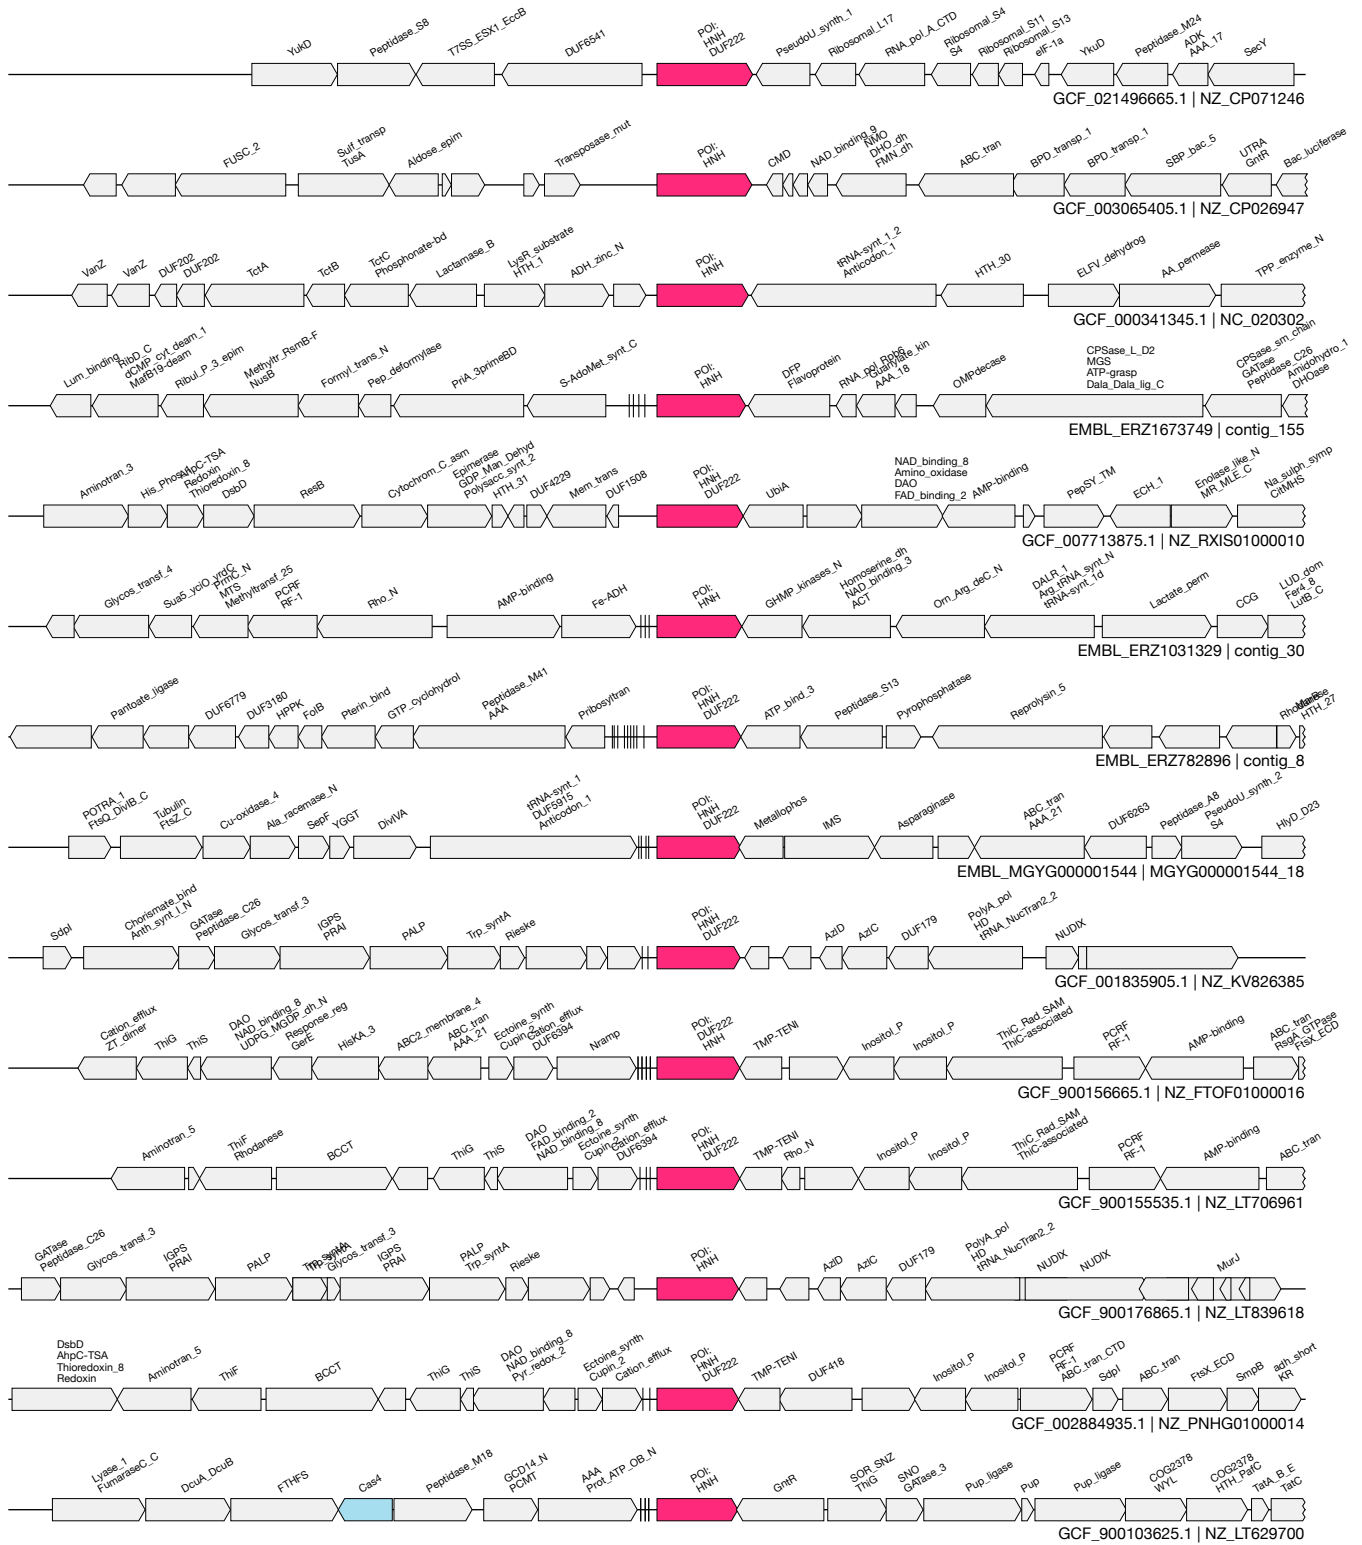

1kb

GO

(GGDEF + MFS + Phospholipase)

25 / 35.5

Non-CRISPR\_hypervariable\_repeaGCF\_002262875.1&&NZ\_NKYE0100003&&91808\_93059\_-1

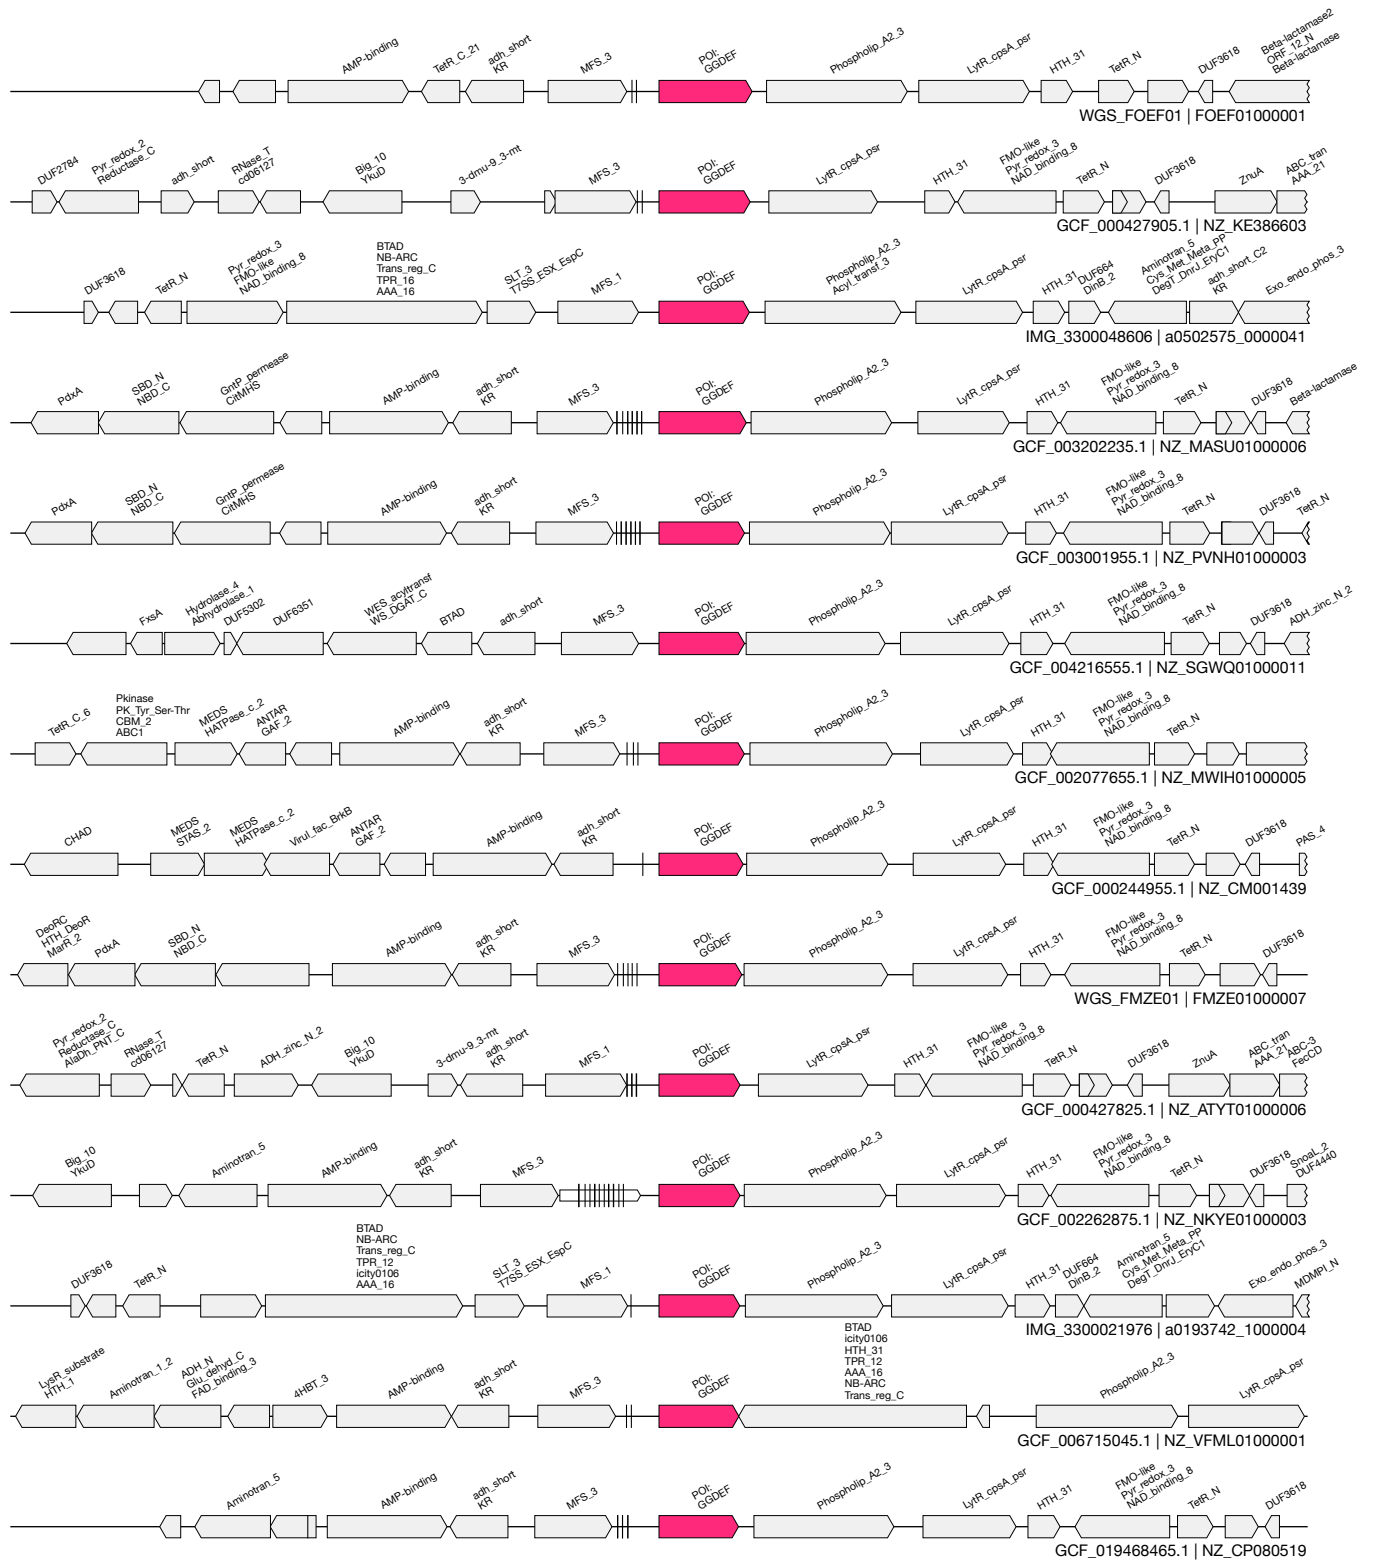

1kb

Fig. S15.

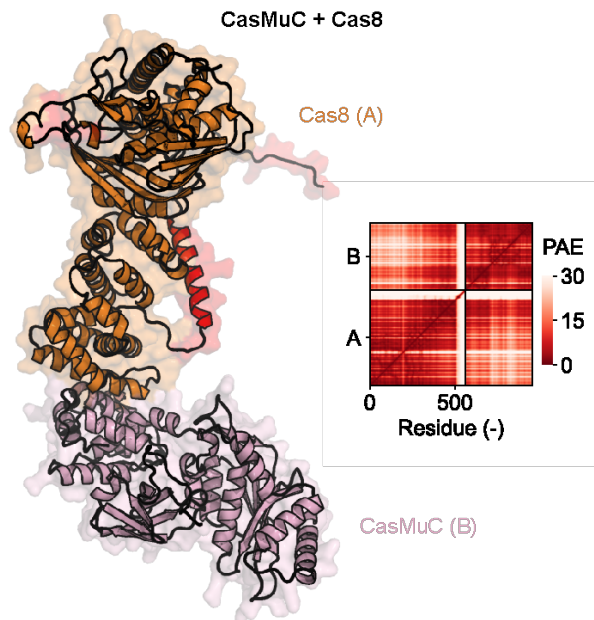

**Fig. S15. AlphaFold2 predictions of CasMu-I system**

AlphaFold2-multimer structural prediction of Cas8 interaction with CasMuC. PAE plot shown on the right.

**Fig. S16.**

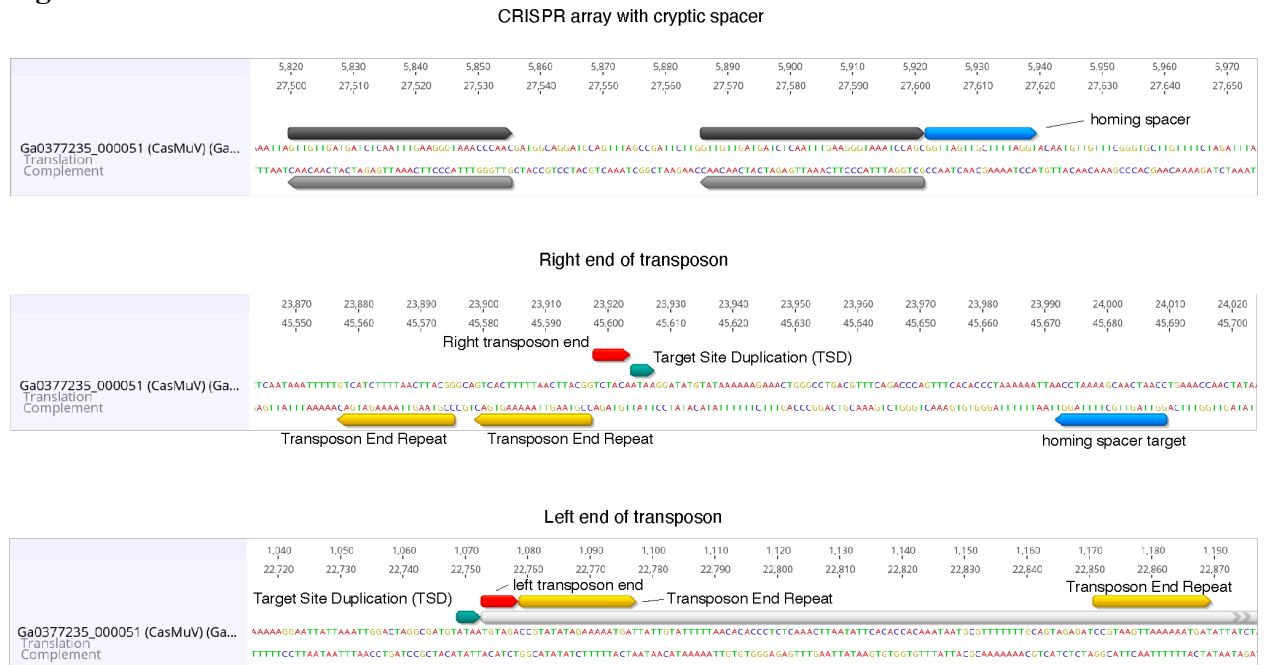

**Fig. S16. CasMu-V Transposon ends and homing spacer**

CasMu-V CRISPR array along with a cryptic spacer outside of the array is shown along with the spacer’s target site 68 bp downstream from the right end of the transposon. The transposon end repeats are present in copies of two, and the exact boundary of the transposon contains the motif TGT which is consistent with Mu-like transposon ends. A target site duplication of length 4 outside of the transposon is detectable as well.

Fig. S17.

A

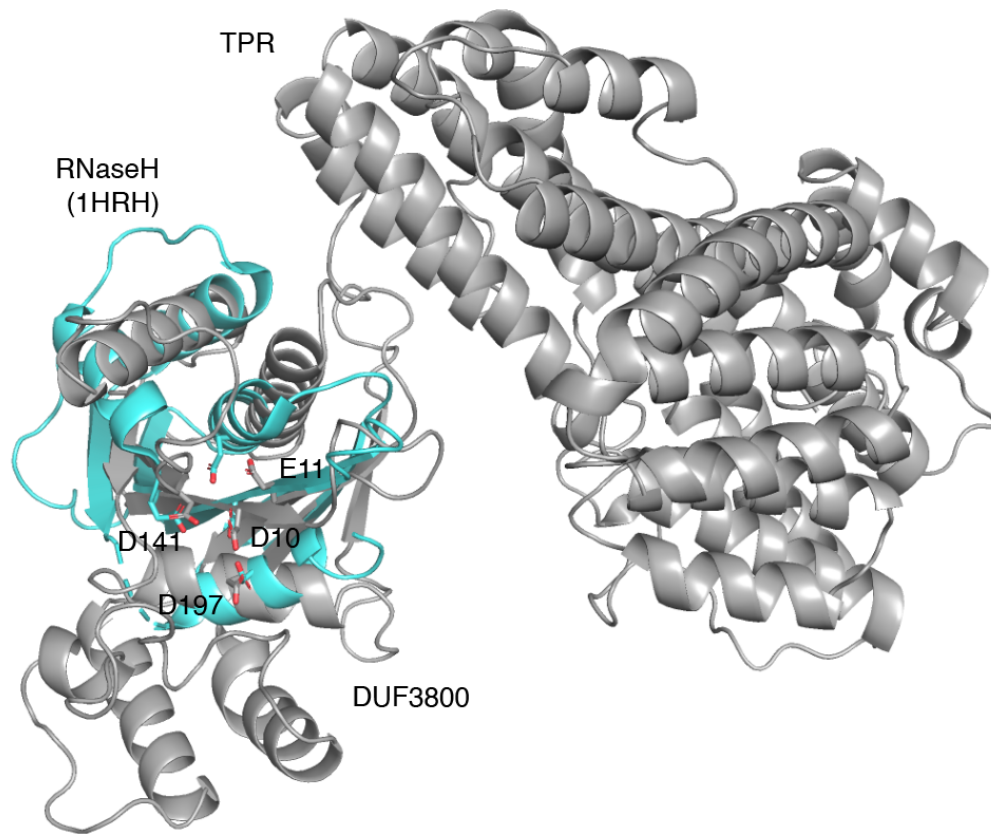

B

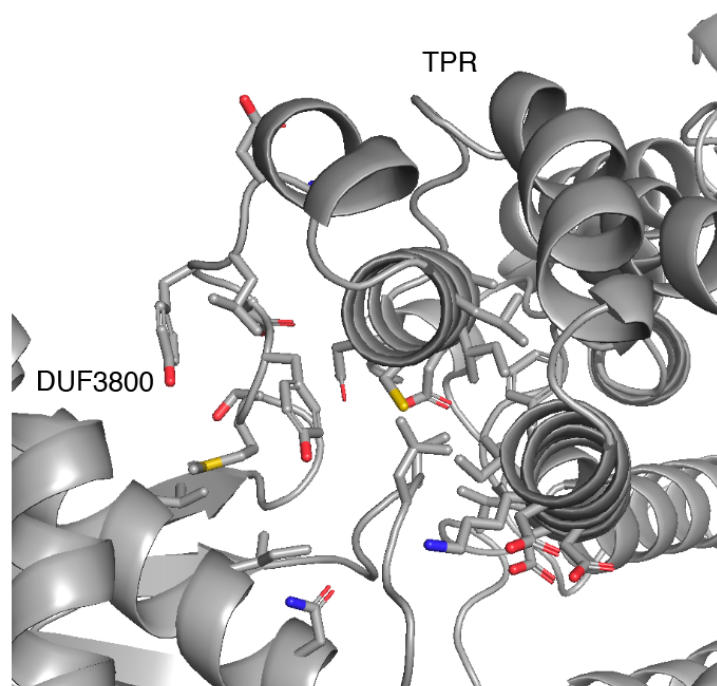

**Fig. S17. Structural comparison of DUF3800-TPR protein**

**(A)** The structure DUF3800-TPR protein from the Cas12a2 associated system was predicted using AlphaFold2 and superimposed with the RNaseH domain from the HIV reverse transcriptase domain (PDH: 1HRH). All catalytic residues from the RNaseH fold was found in the DUF3800 protein, barring one catalytic rearrangement (E11), which takes place of E478 from the HIV reverse transcriptase RNaseH domain. The DUF3800 domain contains an additional segment of alpha helices that are not found in the typical RNaseH fold. **(B)** The TPR domain is apparently connected to the DUF3800 protein via a linker but makes multiple contacts with the DUF3800 domain.

**Fig. S18.**

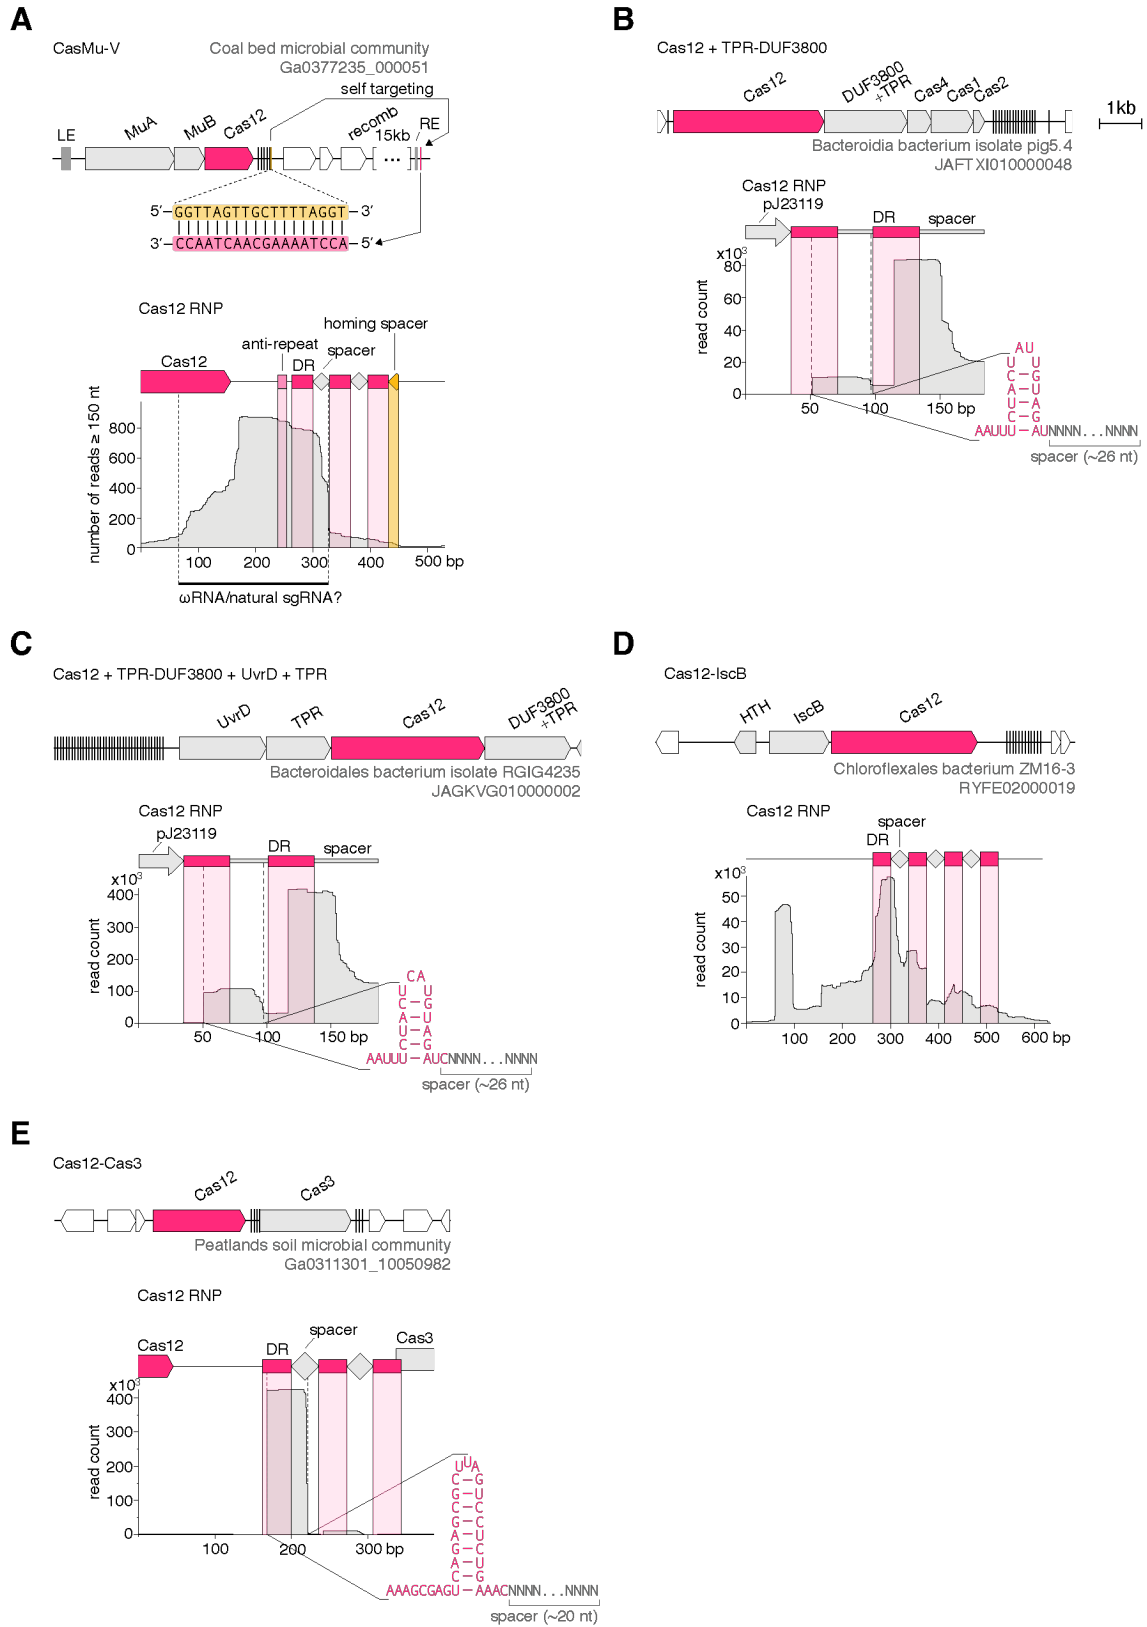



**Fig. S18. Small RNA-seq of Cas12 RNPs from new Type-V associated systems**

Small RNA-seq of affinity purified Cas12 RNPs from (A) CasMu-V, (B) Cas12 + TPR-DUF3800, (C) Cas12 + TPR-DUF3800 + UvrD + TPR, (D) Cas12-IscB and (E) Cas12-Cas3. Cas12s from (B) and (C) were co-expressed with a CRISPR array expressed under a pJ23119 promoter, and all other Cas12s were co-expressed with the full locus encoding the system, with RNA components under control of natural promoters in the locus. All Cas12s co-purified with ncRNA overlapping with the predicted CRISPR array, as shown.





Fig. S19. (cont'd)

C

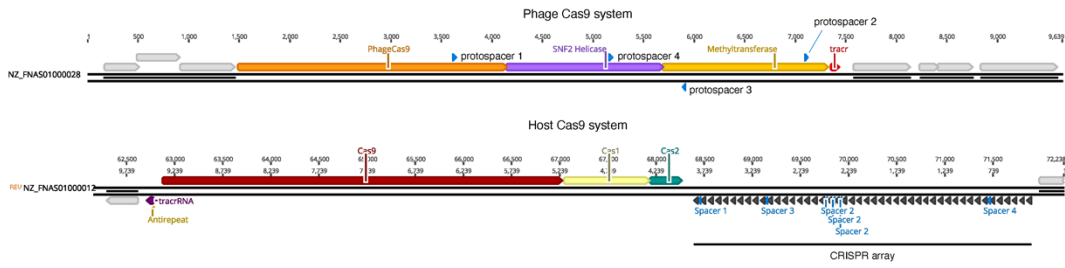

D

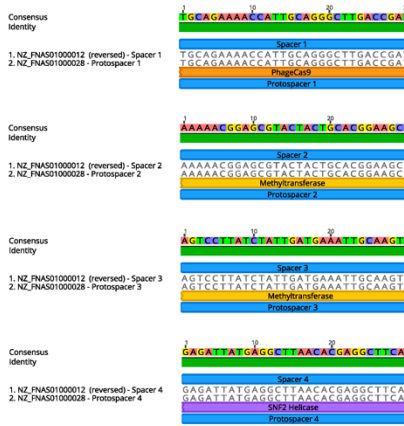

E

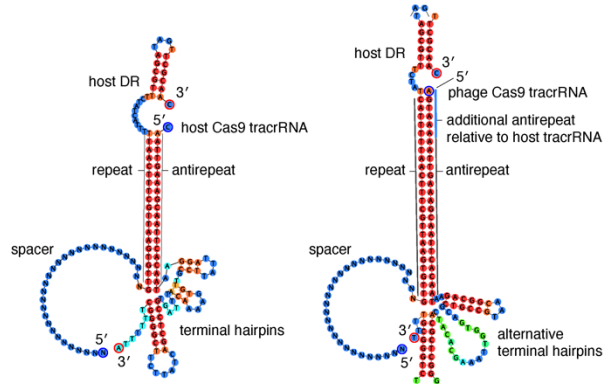

F

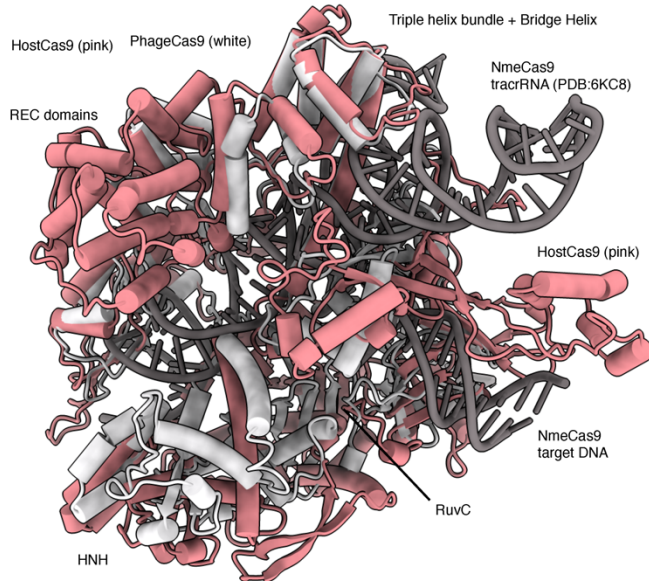

G

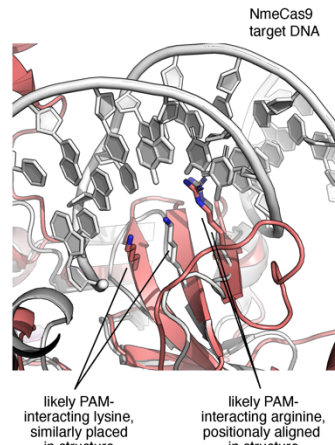

Fig. S19. PhageCas9 compared to a corresponding Cas9 in the host organism

(A) HHpred of the phage Cas9 protein from *Riemerella columbipharyngis* strain DSM 24015-infecting phage along with the catalytic sites shown with black arrows. The RuvC-I and RuvC-III domains are inactivated. (B) HHpred of the host Cas9 protein from *Riemerella*

*columbipharyngis* strain DSM 24015 along with the catalytic sites shown with arrows. All catalytic residues are present. **(C)** Gene locus architectures of the phage Cas9 along with the corresponding host Cas9. The phage Cas9 system has a PhageCas9 along with a SNF2 helicase, a potentially linked methyltransferase, followed by a tracrRNA. 6 CRISPR spacers from the host Cas9 system (with 4 unique sequences) have matches directly to the Phage Cas9 system. **(D)** Matching spacers along with their protospacer sequences in the phage Cas9 system. All hits are exact matches, indicating ongoing conflict between the two systems. **(E)** Comparison of the tracrRNAs from the host Cas9 and the phage Cas9 as they anneal to the host CRISPR direct repeats. Secondary structure predictions were performed with RNAFold from the Vienna RNA package at an annealing temperature of 37°C. **(F)** AlphaFold2 predictions and structural comparison of the phage Cas9 and the host Cas9, which is substantially larger. The two Cas9s are superimposed onto the RNA components from the structure of NmeCas9 (PDB: 6KC8) with the NmeCas9 protein not shown.

**Fig. S20.**

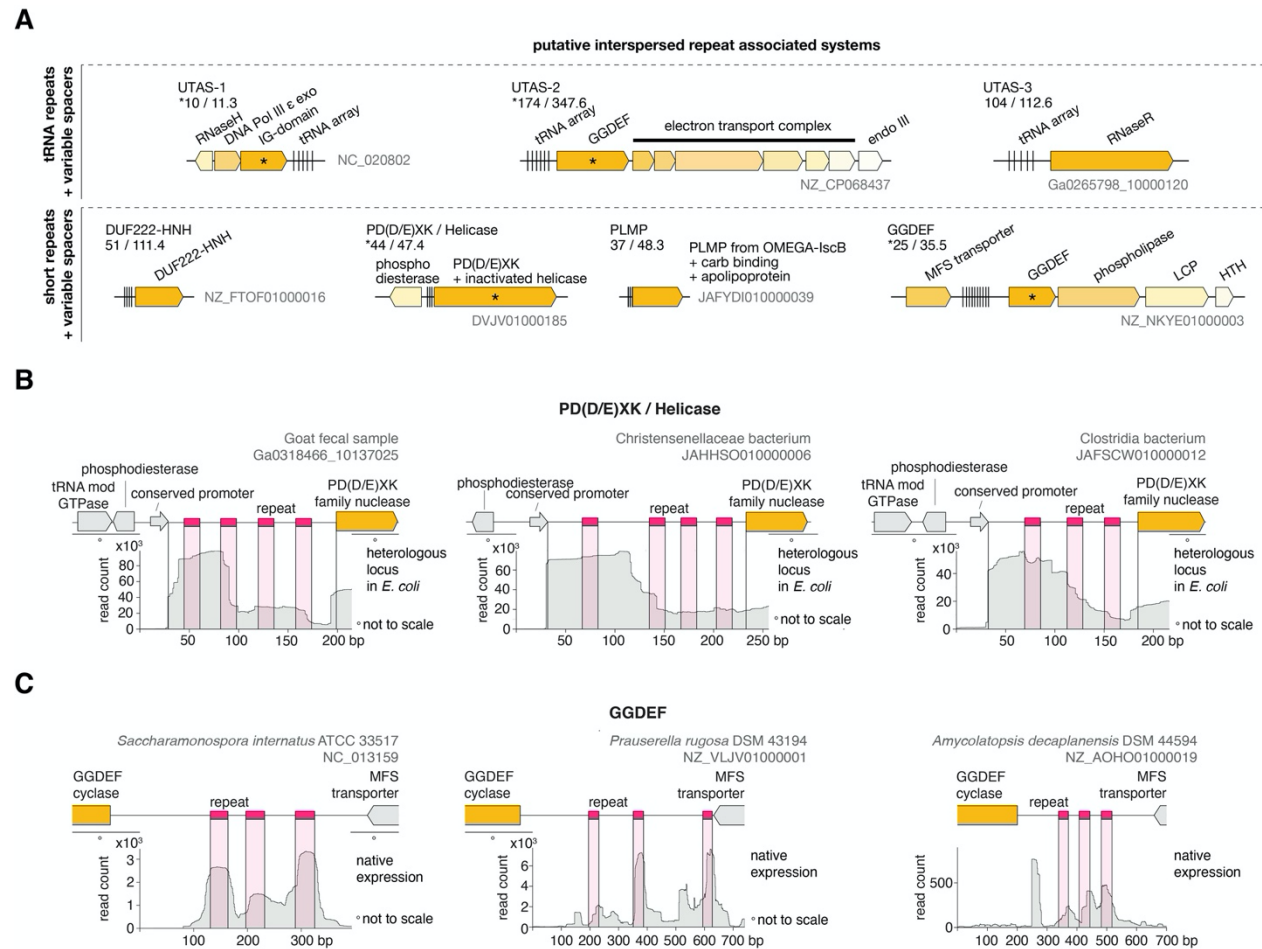

**Fig. S20. Additional interspaced repeat array systems**

(A) Systems identified in this study associated with repeat arrays interspaced with hypervariable sequences with no association to known CRISPR-Cas genes. All enhanced CRISPR association scores are shown below the system name as determined by the pipeline with the numerator corresponding to the number of repeat-associated loci in a given cluster and the denominator being the effective sample size of that cluster. \* denotes the gene for which the score is calculated where multiple genes are present in the system. (B) Small RNA-seq of *E. coli* heterologously expressing PD(D/E)XK loci from plasmids. (C) Small RNA-seq of native organisms harboring instances of the GGDEF system.

Fig. S21.

A

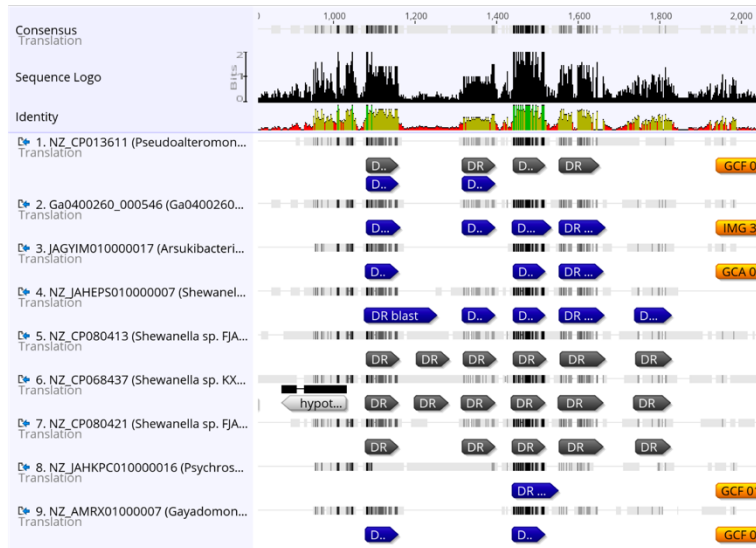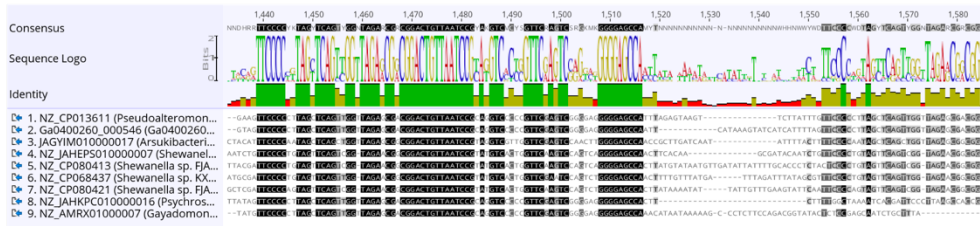





C

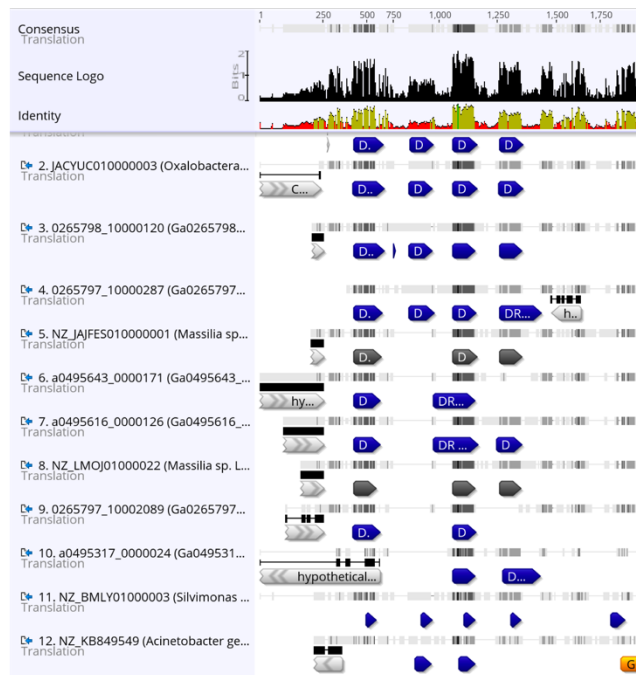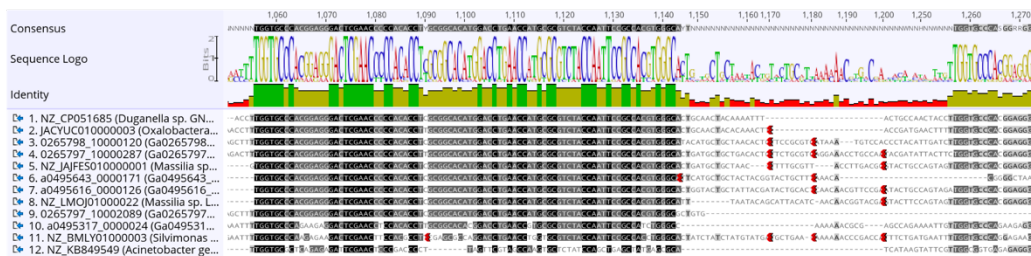

**Fig. S21. Alignments of various tRNA associated systems with variable spacer regions.**

Alignments of representative tRNA arrays from example identified tRNA array systems with variable spacer regions (A) GGDEF tRNA system. (B) DEDDh/DNA Pol III epsilon + RNaseH + TIGR03503 tRNA system. (C) Ribonuclease R tRNA system.

### **Table S1. CRISPR association scores of clusters passing filters**

Data for main CRISPR association analysis of passing clusters. Columns are as follows:

|                        |                                                                                                                             |
|------------------------|-----------------------------------------------------------------------------------------------------------------------------|
| c30_id:                | cluster id                                                                                                                  |
| N_cr:                  | number of CRISPR-associated, non-redundant loci,                                                                            |
| N_cr_search:           | number of CRISPR-associated, non-redundant loci including DRs found from BLAST search of representative DR for the cluster, |
| N:                     | Number of non-redundant loci,                                                                                               |
| N_eff:<br>function     | Effective number of non-redundant loci, as determined by weighting function                                                 |
| N_eff_search:          | Effective number of non-redundant loci, incorporating DRs found from BLAST search, as determined by weighting function      |
| weighted_icity:        | Weighted association score ( $N_{cr} / N_{eff}$ )                                                                           |
| weighted_icity_search: | Weighted association score with DRs found with BLAST ( $N_{cr\_search} / N_{eff\_search}$ )                                 |
| aa_seq:                | Amino acid sequence of the representative cluster member                                                                    |

### **Table S2. Redundant names for Cas proteins**

Example equivalences from legacy Cas names to add clarity to the discussion.

### **Table S3. Pipeline comparisons**

Comparison of 5 pipeline variations in their ability to recover key hits found in the study using comparable thresholds.

### **Table S4. Guide sequences, data and statistical analysis related to genome editing experiments**

Sequence, indel, and statistical testing information from the mammalian genome editing experiments.

### **Table S5. Taxonomic distribution of $\beta$ -CASP proteins**

Distribution of the types of organisms that various  $\beta$ -CASP proteins are found in.

### **Table S6. List of plasmids used in this study and links to sequences**

Information or plasmids used in the experiments.

**Data S1. Appearance of CRISPR systems in public data**

Files contain the data for appearance of CRISPR systems in public data. Each entry in the list of data contains 3 columns. The first column contains the system identifier. The second column contains the list of p\_id's (protein identifiers with the format genome\_name && contig\_name && start \_end \_strand), c30\_ids (30% cluster ids), and with their date of appearance (time at which 4 non-redundant proteins (90% clusters) found within the 30% cluster appeared in the public data). The third columns contain the list of p\_id's (protein identifiers with the format genome\_name && contig\_name && start \_end \_strand), c90\_id's, and and dates of appearance for all non-redundant proteins (90% clusters) within the first 30% cluster to appear in the public data.

**Data S2. Genbank files of all redundant loci associated with the manually curated set of hits**

Protein IDs list the original contig accession of each cluster, and start, end and strand of the protein of interest are noted for each as in Data S1. Available on Zenodo.

**Data S3. Representative proteins from systems identified in this study**

Fasta format file of all proteins associated with CRISPR-linked systems identified in this study, using the uas#A, uas#B... nomenclature.

**Data S4. Protein-protein association analysis results**

Tabular format table with all protein-protein association scores against passing clusters identified in the CRISPR association pipeline. Accession information is encoded in c30\_ids as described in Data S1: (genome\_name && contig\_name && start \_end \_strand) for retrieving protein sequence ids from public data. Available on Zenodo.

**Data S5. Spacer analysis for candidate type VII system**

All spacer hits and search for the experimentally studied candidate type VII system.

**Data S6. Genbank files of all plasmids**

All plasmid maps for plasmids used in this study.
